# Supplementary material for: Exploring Alzheimer’s Disease Molecular Variability via Calculation of Personalized Transcriptional Signatures
Source: Biomolecules. 2020 Mar 26;10(4):503. doi: 10.3390/biom10040503 (PMC7226317; doi:10.3390/biom10040503)
Supplement: Supplementary file 1 [file biomolecules-10-00503-s001.zip]

Archive with 6 entries (5 files):
- suppl/
- suppl/biomolecules-719963-supplementary-1.pdf
- suppl/Supp Table 1.xlsx
- suppl/Supp Table 2.xlsx
- suppl/Supp Table 3.xlsx
- suppl/Supp Table 4.xlsx
