# Supplementary material for: Exploring Alzheimer’s Disease Molecular Variability via Calculation of Personalized Transcriptional Signatures
Source: Biomolecules. 2020 Mar 26;10(4):503. doi: 10.3390/biom10040503 (PMC7226317; doi:10.3390/biom10040503)
Supplement: Supplementary file 1 [file biomolecules-10-00503-s001.zip › suppl/Supp Table 1.xlsx]

## Sheet: G values
	steady state	unbalanced process 1	unbalanced process 2	unbalanced process 3	unbalanced process 4	unbalanced process 5	unbalanced process 6	unbalanced process 7
Gene Symbol	Gi0	Gi1	Gi2	Gi3	Gi4	Gi5	Gi6	Gi7
0	0.0151297	-0.0041244	-0.0117417	0.00809692	0.00254074	0.00795487	0.00824712	0.0015628
0	0.0118678	-0.00728359	-0.0159792	0.00909719	0.00501411	0.0102529	0.0106918	0.0023764
0	0.0151636	-0.00266681	-0.0146537	0.0050042	0.006578	0.0121314	0.0120745	0.00216654
0	0.00963066	-0.00559791	-0.0253453	0.00331449	0.0165172	0.022722	0.0244167	-0.00165235
0	0.00605412	-0.00561631	-0.0214785	0.00504246	0.0110131	0.0136653	0.0162674	0.000889288
0	0.0147712	-0.00440319	-0.0115725	0.00873039	0.00028425	0.00707836	0.00637201	-0.000509062
0	0.00218348	-0.00129412	-0.00201171	0.00275864	0.000373894	-0.00170185	0.00176203	-0.00310064
0	0.00811785	-0.00331182	-0.0275864	0.0029845	0.0190438	0.029307	0.0256827	-0.00114515
0	0.0131854	-0.00585926	-0.0138495	0.0100362	0.00225717	0.00568932	0.00760383	0.00335395
0	0.00493634	-0.00387672	-0.0167986	0.00243609	0.0109973	0.00860013	0.0115722	0.000637344
0	0.0069794	-0.00479377	-0.0244274	0.00327227	0.013894	0.0159744	0.0175967	0.00126919
0	0.00878794	-0.00644516	-0.0213341	0.00435276	0.012977	0.0113696	0.0166387	0.00330497
ACTB	0.0147338	-0.000197077	-0.000527514	0.00348504	-0.000960055	0.0047218	-0.00174835	0.00249709
ACTB	0.0108244	-0.00554111	0.0430006	0.00880843	0.00476395	0.0349413	0.0115605	-0.002821
ACTB	0.0124272	-0.00200031	0.0236471	0.00507467	0.000148938	0.0235388	0.00691646	-0.00295314
0	0.0155754	-0.0024407	-0.00495016	0.00908318	-0.00749991	0.00189883	-0.000161728	-0.00708772
GAPDH	0.0145411	0.000458111	-0.00377947	0.00491695	-2.75104e-05	0.00409147	-0.000373549	-0.000358928
GAPDH	0.0128989	-0.00153335	0.028651	0.00897711	-0.000916661	0.0210111	0.00761653	-0.00236597
GAPDH	0.013248	0.00089517	0.0105215	0.00497459	-0.00207301	0.0172521	0.00605518	-0.00544624
STAT1	0.00573406	0.00608372	-0.00557742	-0.00511994	-0.00202551	0.00169691	-0.0135098	0.0101304
STAT1	0.00318861	-0.00267668	0.0021603	0.0029673	0.00349401	9.57568e-05	-0.000460015	0.00202422
STAT1	0.0031946	-0.00203138	0.00202429	0.00137538	0.00321106	0.00312645	-0.00169468	0.00268308
STAT1	0.00420256	-0.000764235	0.00333043	0.000196574	0.0042283	0.00623357	-0.00326164	0.00705921
0	0.00401566	-0.00294067	-0.00890191	0.00879483	0.00228151	-0.00487932	-0.000164756	-0.00160816
0	0.00322101	-0.00265964	-0.00611472	0.00618588	0.00114748	-0.004877	-0.00030522	0.000384179
0	0.00374163	-0.00348446	-0.0066749	0.00505805	0.00449718	-0.00223281	-0.00066317	-0.00012992
0	0.00260581	-0.00160383	-0.00224217	0.00251588	0.000970034	-0.00110176	0.00187568	-0.00254088
0	0.00247116	-0.00162559	-0.00233994	0.00255101	0.000543927	-0.000222011	0.00220479	-0.00246424
0	0.00263101	-0.000449707	-0.00177333	0.00144252	0.00114402	-0.000116635	0.0015545	-0.00165353
0	0.00204891	-0.000843506	-0.00111219	0.000554349	0.000850053	-0.00103883	-0.00016208	0.000969716
0	0.00429456	-0.00274069	-0.00297239	0.00273021	0.00443843	0.00361468	0.000890971	0.00211102
0	0.003196	-0.00161071	-0.00448557	0.00170472	-0.00116002	0.00233572	0.000407517	-0.00441153
0	0.00338242	-0.00207261	-0.00151801	0.0040197	0.00195001	-0.000539315	0.00259468	-0.00343419
0	0.00227967	-0.00149707	-0.00149984	0.00184158	0.0014937	-0.00139395	0.000473395	-0.00191504
0	0.0024573	-0.00179451	-0.00203557	0.00159559	0.0012514	-0.00181405	0.00161673	-0.00289178
0	0.00553949	-0.0042265	-0.0237716	0.00111178	0.0132815	0.0133461	0.014051	0.00871468
0	0.00676141	-0.00439465	-0.0249834	0.00251059	0.0169517	0.0159019	0.0190826	0.00535591
0	0.00919825	-0.00509973	-0.0212398	0.0053222	0.0144234	0.0133006	0.0161885	0.00935235
0	0.00277491	-0.00120805	-0.00158217	0.00302089	0.000777454	0.000427664	0.000147968	-0.000425131
0	0.00241922	-0.00236332	-0.00209974	0.00274522	0.00307874	-0.00155004	0.00317433	-0.00345481
0	0.00291951	-0.00206189	-0.00160718	0.00289029	0.00177893	-0.000806091	0.0012048	-0.00369296
0	0.00349145	-0.00165614	-0.00202541	0.00418829	0.00130257	-0.00174496	5.38899e-05	-0.00146576
0	0.00244698	-0.00176701	-0.00212133	0.00293348	0.00132083	-0.000688181	0.00176536	-0.00250456
0	0.00271267	-0.00222828	-0.00254869	0.00300026	0.00214149	-0.00145869	0.00164296	-0.00389325
0	0.00239486	-0.00109474	-0.00234333	0.00270441	0.000692323	-0.000158466	0.00112228	-0.00046642
0	0.00290055	-0.0011073	-0.00253731	0.00312193	0.00217507	-0.00116989	0.00010626	-0.00146469
0	0.00206451	-0.00140319	-0.00159221	0.00309056	0.00157349	0.000273642	4.45318e-05	2.28902e-05
0	0.0152066	-0.00400748	-0.0107115	0.00793056	0.00264701	0.0069689	0.00714401	0.00349108
0	0.0123931	-0.00696605	-0.0154091	0.00892952	0.00588667	0.0090845	0.0117101	1.42853e-05
0	0.0149827	-0.00279528	-0.0130759	0.00504974	0.00743207	0.0108491	0.0115496	0.00362742
0	0.0106044	-0.00570227	-0.0231712	0.00635771	0.0148398	0.019578	0.0214328	-0.000753073
0	0.00831297	-0.00718441	-0.0259299	0.00641585	0.0136137	0.0184334	0.0188237	0.00187629
0	0.0156107	-0.00372203	-0.00971026	0.00810323	0.00139794	0.00523105	0.00392738	0.004216
0	0.00319331	-0.00147502	-0.00236363	0.00368332	0.000457711	-0.00254975	0.00105664	-0.00240534
0	0.0035202	-0.00331277	-0.00765678	0.00697015	0.00316521	-0.00761366	0.00176872	-0.00475932
0	0.00323724	-0.00272048	-0.00748471	0.00547069	0.00227622	-0.00411339	-0.000371439	-0.000570527
0	0.0027577	-0.00168396	-0.00653199	0.00210247	0.00440663	-0.00307751	0.00357943	-0.00250372
0	0.00447105	-0.00570728	-0.00287067	0.0109863	0.00295379	-0.0031253	2.65518e-05	-0.000394485
0	0.00379022	-0.00220746	-0.00857867	0.00653239	0.00287401	-0.00201474	0.00178256	-0.00110365
0	0.00370768	-0.0031472	-0.00306871	0.00399207	0.00357303	-0.000724069	0.00135196	0.000976985
0	0.0105132	-0.0043672	-0.0253791	0.00153927	0.0227139	0.0222014	0.027504	0.00329707
0	0.0143323	-0.00540239	-0.0118684	0.0103395	0.00191759	0.00320807	0.00672162	0.00383191
0	0.0024531	-0.0012268	-0.00227378	0.00223366	0.000252795	-0.000215544	0.00063779	-0.00148646
0	0.0030971	-0.00153965	-0.00193003	0.00318911	0.00086205	-0.000575489	-0.000256292	-0.00153273
0	0.00262336	-0.0012906	-0.00167121	0.00245775	0.00157633	-0.0017689	0.0011358	-0.00152764
0	0.00233687	-0.0012874	-0.00180094	0.00182749	0.00101332	4.04283e-05	0.00211372	-0.00308568
0	0.00218881	-0.00113035	-0.000829298	0.00144686	0.00167312	-0.000621071	0.00142805	-0.00104156
0	0.00255815	-0.00120048	-0.00160679	0.00211644	0.00124243	-0.000570435	0.00121109	-0.00244533
0	0.0151297	-0.0041244	-0.0117417	0.00809692	0.00254074	0.00795487	0.00824712	0.0015628
0	0.0118678	-0.00728359	-0.0159792	0.00909719	0.00501411	0.0102529	0.0106918	0.0023764
0	0.0151636	-0.00266681	-0.0146537	0.0050042	0.006578	0.0121314	0.0120745	0.00216654
0	0.00963066	-0.00559791	-0.0253453	0.00331449	0.0165172	0.022722	0.0244167	-0.00165235
0	0.00605412	-0.00561631	-0.0214785	0.00504246	0.0110131	0.0136653	0.0162674	0.000889288
0	0.0147712	-0.00440319	-0.0115725	0.00873039	0.00028425	0.00707836	0.00637201	-0.000509062
0	0.00218348	-0.00129412	-0.00201171	0.00275864	0.000373894	-0.00170185	0.00176203	-0.00310064
0	0.00811785	-0.00331182	-0.0275864	0.0029845	0.0190438	0.029307	0.0256827	-0.00114515
0	0.0131854	-0.00585926	-0.0138495	0.0100362	0.00225717	0.00568932	0.00760383	0.00335395
0	0.00493634	-0.00387672	-0.0167986	0.00243609	0.0109973	0.00860013	0.0115722	0.000637344
0	0.0069794	-0.00479377	-0.0244274	0.00327227	0.013894	0.0159744	0.0175967	0.00126919
0	0.00878794	-0.00644516	-0.0213341	0.00435276	0.012977	0.0113696	0.0166387	0.00330497
ACTB	0.0147338	-0.000197077	-0.000527514	0.00348504	-0.000960055	0.0047218	-0.00174835	0.00249709
ACTB	0.0108244	-0.00554111	0.0430006	0.00880843	0.00476395	0.0349413	0.0115605	-0.002821
ACTB	0.0124272	-0.00200031	0.0236471	0.00507467	0.000148938	0.0235388	0.00691646	-0.00295314
0	0.0155754	-0.0024407	-0.00495016	0.00908318	-0.00749991	0.00189883	-0.000161728	-0.00708772
GAPDH	0.0145411	0.000458111	-0.00377947	0.00491695	-2.75104e-05	0.00409147	-0.000373549	-0.000358928
GAPDH	0.0128989	-0.00153335	0.028651	0.00897711	-0.000916661	0.0210111	0.00761653	-0.00236597
GAPDH	0.013248	0.00089517	0.0105215	0.00497459	-0.00207301	0.0172521	0.00605518	-0.00544624
STAT1	0.00573406	0.00608372	-0.00557742	-0.00511994	-0.00202551	0.00169691	-0.0135098	0.0101304
STAT1	0.00318861	-0.00267668	0.0021603	0.0029673	0.00349401	9.57568e-05	-0.000460015	0.00202422
STAT1	0.0031946	-0.00203138	0.00202429	0.00137538	0.00321106	0.00312645	-0.00169468	0.00268308
STAT1	0.00420256	-0.000764235	0.00333043	0.000196574	0.0042283	0.00623357	-0.00326164	0.00705921
0	0.00401566	-0.00294067	-0.00890191	0.00879483	0.00228151	-0.00487932	-0.000164756	-0.00160816
0	0.00322101	-0.00265964	-0.00611472	0.00618588	0.00114748	-0.004877	-0.00030522	0.000384179
0	0.00374163	-0.00348446	-0.0066749	0.00505805	0.00449718	-0.00223281	-0.00066317	-0.00012992
0	0.00260581	-0.00160383	-0.00224217	0.00251588	0.000970034	-0.00110176	0.00187568	-0.00254088
0	0.00247116	-0.00162559	-0.00233994	0.00255101	0.000543927	-0.000222011	0.00220479	-0.00246424
0	0.00263101	-0.000449707	-0.00177333	0.00144252	0.00114402	-0.000116635	0.0015545	-0.00165353
0	0.00204891	-0.000843506	-0.00111219	0.000554349	0.000850053	-0.00103883	-0.00016208	0.000969716
0	0.00429456	-0.00274069	-0.00297239	0.00273021	0.00443843	0.00361468	0.000890971	0.00211102
0	0.003196	-0.00161071	-0.00448557	0.00170472	-0.00116002	0.00233572	0.000407517	-0.00441153
0	0.00338242	-0.00207261	-0.00151801	0.0040197	0.00195001	-0.000539315	0.00259468	-0.00343419
0	0.00227967	-0.00149707	-0.00149984	0.00184158	0.0014937	-0.00139395	0.000473395	-0.00191504
0	0.0024573	-0.00179451	-0.00203557	0.00159559	0.0012514	-0.00181405	0.00161673	-0.00289178
0	0.00553949	-0.0042265	-0.0237716	0.00111178	0.0132815	0.0133461	0.014051	0.00871468
0	0.00676141	-0.00439465	-0.0249834	0.00251059	0.0169517	0.0159019	0.0190826	0.00535591
0	0.00919825	-0.00509973	-0.0212398	0.0053222	0.0144234	0.0133006	0.0161885	0.00935235
0	0.00277491	-0.00120805	-0.00158217	0.00302089	0.000777454	0.000427664	0.000147968	-0.000425131
0	0.00241922	-0.00236332	-0.00209974	0.00274522	0.00307874	-0.00155004	0.00317433	-0.00345481
0	0.00291951	-0.00206189	-0.00160718	0.00289029	0.00177893	-0.000806091	0.0012048	-0.00369296
0	0.00349145	-0.00165614	-0.00202541	0.00418829	0.00130257	-0.00174496	5.38899e-05	-0.00146576
0	0.00244698	-0.00176701	-0.00212133	0.00293348	0.00132083	-0.000688181	0.00176536	-0.00250456
0	0.00271267	-0.00222828	-0.00254869	0.00300026	0.00214149	-0.00145869	0.00164296	-0.00389325
0	0.00239486	-0.00109474	-0.00234333	0.00270441	0.000692323	-0.000158466	0.00112228	-0.00046642
0	0.00290055	-0.0011073	-0.00253731	0.00312193	0.00217507	-0.00116989	0.00010626	-0.00146469
0	0.00206451	-0.00140319	-0.00159221	0.00309056	0.00157349	0.000273642	4.45318e-05	2.28902e-05
0	0.0152066	-0.00400748	-0.0107115	0.00793056	0.00264701	0.0069689	0.00714401	0.00349108
0	0.0123931	-0.00696605	-0.0154091	0.00892952	0.00588667	0.0090845	0.0117101	1.42853e-05
0	0.0149827	-0.00279528	-0.0130759	0.00504974	0.00743207	0.0108491	0.0115496	0.00362742
0	0.0106044	-0.00570227	-0.0231712	0.00635771	0.0148398	0.019578	0.0214328	-0.000753073
0	0.00831297	-0.00718441	-0.0259299	0.00641585	0.0136137	0.0184334	0.0188237	0.00187629
0	0.0156107	-0.00372203	-0.00971026	0.00810323	0.00139794	0.00523105	0.00392738	0.004216
0	0.00319331	-0.00147502	-0.00236363	0.00368332	0.000457711	-0.00254975	0.00105664	-0.00240534
0	0.0035202	-0.00331277	-0.00765678	0.00697015	0.00316521	-0.00761366	0.00176872	-0.00475932
0	0.00323724	-0.00272048	-0.00748471	0.00547069	0.00227622	-0.00411339	-0.000371439	-0.000570527
0	0.0027577	-0.00168396	-0.00653199	0.00210247	0.00440663	-0.00307751	0.00357943	-0.00250372
0	0.00447105	-0.00570728	-0.00287067	0.0109863	0.00295379	-0.0031253	2.65518e-05	-0.000394485
0	0.00379022	-0.00220746	-0.00857867	0.00653239	0.00287401	-0.00201474	0.00178256	-0.00110365
0	0.00370768	-0.0031472	-0.00306871	0.00399207	0.00357303	-0.000724069	0.00135196	0.000976985
0	0.0105132	-0.0043672	-0.0253791	0.00153927	0.0227139	0.0222014	0.027504	0.00329707
0	0.0143323	-0.00540239	-0.0118684	0.0103395	0.00191759	0.00320807	0.00672162	0.00383191
0	0.0024531	-0.0012268	-0.00227378	0.00223366	0.000252795	-0.000215544	0.00063779	-0.00148646
0	0.0030971	-0.00153965	-0.00193003	0.00318911	0.00086205	-0.000575489	-0.000256292	-0.00153273
0	0.00262336	-0.0012906	-0.00167121	0.00245775	0.00157633	-0.0017689	0.0011358	-0.00152764
0	0.00233687	-0.0012874	-0.00180094	0.00182749	0.00101332	4.04283e-05	0.00211372	-0.00308568
0	0.00218881	-0.00113035	-0.000829298	0.00144686	0.00167312	-0.000621071	0.00142805	-0.00104156
0	0.00255815	-0.00120048	-0.00160679	0.00211644	0.00124243	-0.000570435	0.00121109	-0.00244533
JMJD1C	0.00310264	-0.00167943	-0.00118792	0.00205428	0.0026136	0.000115047	0.000111057	0.00108651
JMJD1C	0.00299755	-0.00350821	0.00476285	0.00536866	0.00285315	-0.0031391	-0.000330425	0.00298836
RAB12	0.0101317	-0.00148942	0.0010077	0.00363123	0.00473591	-0.00721745	-0.00371082	0.00242266
0	0.00341198	-0.00378031	0.000483372	0.00329687	-0.00102067	-0.00505896	0.000530077	0.00134129
MSL1	0.00694665	0.00180932	0.00492065	-0.00798593	-0.0009837	-0.00388471	-0.00129965	-0.00405607
0	0.00421082	-0.00214783	-0.0024373	0.00459313	0.00133466	-0.00221738	-0.00113978	0.00362911
0	0.00358351	-0.00461896	-0.00146244	0.00446451	0.00329164	-0.000779035	0.00255979	0.00238095
0	0.00518645	-0.00441223	-0.00169768	0.00161486	-0.00668188	-0.0012398	0.0019682	0.00111434
0	0.00319083	-0.00284405	-0.000634489	0.00293725	-0.0006292	-0.00366808	0.0010758	0.0022382
FZD3	0.00552243	0.0129624	0.000818556	-0.00761682	0.00462414	-0.0152624	-0.00811099	-0.0054461
STK35	0.00574827	0.00324022	0.00280194	0.00245645	-0.00400653	-0.00440206	0.00246215	-0.00452854
STK35	0.00685888	0.00910599	-0.00628212	-0.00591954	-0.00760909	-0.0159344	-0.00377788	-0.0109517
AMIGO1	0.00527027	0.00775034	-0.000654531	-0.00254953	0.0062903	0.00221436	0.0010462	-0.00773377
SLC44A5	0.00341879	0.00556898	-0.00212001	0.00105597	0.000746894	-0.00618497	-0.000295375	-0.00105444
0	0.00316332	-0.00385341	0.00433112	0.00462902	-0.00173602	-0.0032205	-0.00303642	-0.000688517
C19orf54	0.00392318	-0.00313696	-0.00432517	-0.000359356	-0.000912404	2.84632e-05	0.000780988	-0.000867552
RP11-454F8.2	0.00325146	-0.00200148	-0.00132752	0.00238131	-0.000794783	-0.00179594	0.00122778	-0.000725091
0	0.00420567	-0.00716284	0.005262	-0.00201898	-0.00241454	-0.0093261	0.000145939	-0.000203403
0	0.00244434	-0.00175048	-0.00165407	0.00302774	0.00260199	-0.00145483	-0.000133518	0.00316879
0	0.00283613	-0.00124249	8.99583e-05	0.00236984	0.00229755	-0.00172876	0.0019157	-0.00028758
0	0.00266778	-0.00331159	-0.00026722	8.60629e-05	0.00114639	-0.00201622	0.00140715	-0.00114876
0	0.00362276	-0.00289034	-0.00388937	0.00364726	0.00231542	0.00171232	0.000854929	0.00142584
LOC101928433	0.00268685	-0.00186608	-0.000139794	0.000158936	0.00283682	-0.00112221	0.0028385	-0.000604522
0	0.00299291	-0.000610817	-0.00023063	0.00101013	0.00184438	-0.00212865	-3.00928e-05	-0.00128446
SATB1	0.00528646	0.020077	-0.00179614	0.00369643	-0.0127171	-0.013836	0.00106835	0.00320945
USP24	0.00328204	-0.00257188	0.0023792	0.000432643	-0.00055011	-0.00166321	0.000281775	-0.00457762
ATP2B2	0.00898047	0.0247025	-0.0104261	0.00826328	-0.0150212	-0.0269192	0.0132814	-0.0145146
0	0.00359253	-0.00411907	-0.00176749	0.00240143	0.00293057	-0.00261832	0.000456171	0.00369424
SLMO2	0.00481925	-0.0046557	0.00300191	0.00313907	0.00202807	-0.00178025	-0.00117637	0.00797082
C6orf89	0.00357401	-0.00338871	0.00314726	0.00241891	-0.000616725	-0.00212638	-0.00108416	0.00186732
0	0.00256027	-0.00257346	-8.91263e-05	0.00198827	0.00156164	-7.06226e-05	-0.00145046	0.00287506
0	0.00280128	-0.00297758	-0.00117139	0.00333934	0.00220399	0.00111685	0.00188644	0.00141124
TAF1B	0.00336205	-0.00121032	-0.00297497	0.00173715	0.00161649	-0.0032819	0.000960523	-0.00230681
0	0.00208092	-0.000641493	-0.00171108	0.00121221	-2.07003e-05	-0.00118801	-5.6887e-05	-0.000436024
VPS26A	0.00284928	-0.00241779	-0.000215451	0.00137456	-0.000134607	-0.00167306	0.000115192	-0.00307523
ZNF236	0.00475942	-0.00703015	-0.00419789	0.00962172	0.00399062	-0.00567406	-0.00201675	0.0130045
NFKBID	0.00283854	-0.00123942	-0.000500385	0.00141189	0.00226702	-0.00105566	-0.00109623	-0.00114038
NUP153	0.00321382	-0.00203414	-0.00101335	0.000568327	0.00200941	-0.00187749	0.000207608	-0.00137016
0	0.00307327	-0.00282034	-0.000600919	0.00270769	0.00231562	-0.000637131	0.00351573	-0.000357006
0	0.00284111	-0.00268405	0.000930716	0.00208182	9.15017e-05	-0.00429976	0.000872432	-0.00131878
CHRNA10	0.00268746	-0.00151284	-0.00201573	0.00138621	0.00170203	-0.0010823	0.000199433	0.00109446
NLRC5	0.00299832	-0.00406125	-0.0018122	-0.0033262	0.00438541	0.000960506	-0.00892821	-0.00171944
SPTLC3	0.00282543	-0.0022755	-0.000779378	0.0011894	0.00302381	-0.000793064	-0.00218042	0.00144703
PNPO	0.00435929	0.0065248	0.00364244	-0.00487058	0.00205632	0.000537686	0.00257655	-0.00771194
MET	0.00299499	-0.00253885	-0.00244456	0.00241344	-0.00030814	-0.00327121	0.000277992	-0.00155883
0	0.00340537	-0.00343313	-0.00162894	0.00272868	0.00396645	-0.00433437	0.00076243	0.00133123
0	0.00279931	-0.00265222	-0.00128317	0.00261531	0.00290241	-0.00134265	0.00246662	0.00128552
TRABD2A	0.00378732	0.000833723	-0.0023774	0.00447061	0.000787781	0.0017437	0.00025946	0.000293083
LUC7L3	0.00334182	-0.00179121	0.00624462	0.0053975	-0.00616101	-0.00899435	-0.00209734	-0.00541714
0	0.00350784	-0.0014975	-0.00271672	0.00270321	0.000580082	-0.00203406	-0.00183393	0.00432624
0	0.00382393	-5.38958e-06	-0.000170651	-0.00168364	-0.000461643	-0.00270111	-0.000257747	-0.00417275
0	0.00298918	-0.00275512	0.00255246	0.00289758	0.000310874	-0.00376258	0.00137722	-7.98529e-05
TTLL11	0.00301113	-0.00233488	0.000479598	8.32999e-05	0.0018475	-0.000527924	0.00184332	0.00318203
FAM109A	0.00513069	-0.00145276	-0.00352129	0.00412268	0.00047458	0.006501	0.00263281	-0.00317996
0	0.00340519	-0.00164398	-0.00217687	0.00235284	0.0010089	-0.00172469	0.000848486	6.17573e-05
LOC644656	0.003248	-0.00105371	-0.00206372	-0.000777213	-0.00103209	0.0044432	0.00101067	-0.00234785
0	0.00280408	-0.00261792	-0.00154216	0.00214333	0.0032214	-0.000406859	0.00165221	0.000971185
0	0.00270908	-0.00270003	-0.001393	0.00291243	0.00109533	-0.00377671	-0.000994901	0.00156776
0	0.00219163	-0.00180879	-0.000718149	0.00073298	0.00309243	-0.00122419	0.00171485	0.000269276
NSMCE4A	0.00300891	-0.00174608	0.000494325	-0.00436858	0.00424656	-0.00185812	0.00283599	-0.00175129
0	0.00259989	-0.00242444	-0.000887256	0.00216892	0.00201161	-0.00119239	-0.000645485	0.00306913
CCDC17	0.0031981	-0.000859525	-0.00175014	0.00367459	-4.76699e-05	-0.00247228	-4.36534e-05	0.00106485
CSNK1A1	0.00291969	-0.00259505	2.8694e-05	0.000397645	0.00373585	-0.00062938	0.00039664	0.00142117
LOC100126784	0.00351401	-0.002621	0.000586794	0.00194771	0.00416138	-0.000759096	0.0024782	-0.000611868
0	0.00296332	-0.00261529	-0.00215895	0.0016894	0.00263876	-0.000764393	0.00126109	0.00222549
TBCD	0.00248331	-0.00186133	-0.000643072	0.000791813	0.00234122	-0.00065584	0.00178513	-0.00145417
0	0.0024547	-0.0026772	-0.00189577	0.00225131	0.0019628	-0.00174059	0.000738588	0.00201543
TM2D1	0.00403139	-0.00110744	-0.0010559	-0.00208088	-0.00122035	0.000286883	-0.00252831	0.00498167
TM2D1	0.00787414	0.00567865	-0.0102005	-0.010132	-0.00423109	-0.00706797	-0.00684836	0.0178174
0	0.00287838	-0.00284339	-0.00244016	0.00216621	0.00536225	-3.45237e-05	0.00225682	0.00209013
CIRBP-AS1	0.00282797	-0.0015395	-0.00234702	0.001415	0.0026464	-0.000129158	0.00168631	-0.000694481
0	0.00366102	-0.00316935	-0.00109544	0.00321748	0.00253744	-0.000995516	0.00119671	0.00259185
MRPS14	0.00577807	-0.000463261	-0.00442872	-0.00604975	-0.0012847	0.000386997	-0.00100785	0.00631579
0	0.00305223	-0.00177401	-0.00104856	0.00107484	0.00179556	-0.00111756	-0.000529032	0.00142461
ZNF540	0.00525476	0.00999739	-0.00284359	-0.00831518	0.00515084	-0.00397189	-0.00260931	-0.00959872
DAGLB	0.00430159	0.00379904	0.000173268	-0.00214671	0.00533906	0.00211547	0.000287047	-0.00843183
LYRM5	0.0088868	-0.00145361	-0.00199614	-0.0150418	-0.000417134	-0.00495883	-0.00842701	0.00105527
CAMTA1	0.00329571	-0.00185932	-0.000498887	0.00239682	0.00193352	-0.00124619	-2.39996e-05	-0.000920518
TUBGCP2	0.00347326	-0.00288595	-0.00129861	0.00295749	0.00292075	-0.00322042	0.000416351	0.0005311
0	0.003695	-0.000466137	-0.00167148	0.00269509	0.00356129	-0.00133779	0.00191087	0.00223927
0	0.00268924	-0.00313927	0.000421924	0.00168259	0.00426189	-0.000921998	0.00204668	-0.00123886
0	0.00301534	-0.00282761	0.00109494	0.00353689	0.000668997	-0.00390855	-0.00101376	-0.00115605
0	0.00295194	-0.000463218	-0.000738439	0.00157252	-0.000281529	-0.00321646	0.00127682	-0.000895344
0	0.00305595	-0.00484445	-0.00356472	0.00443115	0.0039848	-0.00554203	-0.00107019	0.0085205
TMEM196	0.00376748	0.00316883	0.00263445	-0.000822811	0.00849479	-0.0036861	0.00138652	0.00146803
0	0.00341281	-0.0027333	-0.00187029	0.00258699	0.00240814	-0.001916	0.000370529	0.00359116
0	0.00342683	-0.00309651	-0.00227608	0.00390224	0.0028675	-0.000608934	0.00128245	0.000759996
RIMKLA	0.00380369	0.00542253	-0.00118614	0.00312281	0.000252404	-0.00808868	0.00250278	0.00472836
ACP6	0.00341012	-0.00179951	-0.00407839	0.00173853	0.00091757	-0.00311995	-0.000130976	-0.000196116
FUT9	0.00950204	0.00987231	-0.0024472	-0.000919573	-0.00725917	0.00280898	-0.00344962	0.000644753
RHBDD3	0.00502308	-0.00499606	-0.00340991	0.00951206	-0.000108198	0.00162716	0.00129957	-0.00612253
FLJ41455	0.00356439	-0.00414109	-0.00519569	-0.000752537	0.00304003	-0.00768186	-0.00426964	0.00152951
ZNF837	0.00234883	-0.000909384	0.000149489	0.00146659	0.00350707	0.00040388	0.00074245	-0.000480559
LOC100996542	0.00253776	-0.000540965	-0.00211039	0.00157415	0.00204084	-0.00362695	-0.00175967	0.00244372
0	0.00390003	-0.00311614	-0.00267697	0.00521455	0.00119695	-0.00404363	0.00215605	-0.00109699
FOXO3	0.00340122	-0.00296629	0.000294443	0.0022953	0.00181992	0.000374653	0.000307194	-0.000484798
0	0.00325446	-0.00297065	-0.0035874	0.00489137	0.00116003	-0.0023081	0.00260393	-2.62528e-06
0	0.00309854	-0.00381364	0.00695995	0.00304405	-0.00787277	-0.00965214	0.000631243	-0.00193603
EPB41L2	0.00253954	-0.00166455	-0.00104365	0.00208522	-0.0006606	-0.00248308	-0.00100422	0.00238392
NDFIP2	0.0067389	0.0122735	0.0116814	-0.00622226	0.00231474	-0.0103923	-0.000519329	0.00838475
0	0.00292794	-0.00266867	-0.00248553	0.00286533	0.00400323	0.00228376	0.00360198	0.000454979
RP11-373D23.2	0.00316421	-0.00284039	-9.59695e-05	0.00187905	0.00174698	-0.00153484	-0.00304723	0.00035059
C18orf54	0.00292102	-0.00364632	-0.00118305	0.00277547	0.00185185	-0.00344913	0.00119572	0.00475969
LOC100130093 /// SNAP47	0.0070668	0.00740781	-0.000462119	-0.00587991	0.00858543	-0.0045421	0.00310514	-0.0100228
CAMSAP1	0.00583549	0.00704592	0.000923328	-0.00311018	0.00277434	0.00449838	-0.000138586	0.0049697
LOC102725436 /// PMS2P4	0.00302076	-0.00121489	-0.000547913	0.00229357	0.00274654	-0.000449379	0.000898978	0.000215957
KLF12	0.00686355	0.0101676	0.0020875	-0.00358463	-0.00888524	-0.0146763	-0.00478357	-0.000262835
0	0.00451533	-0.00408045	0.00327502	0.00352204	0.000381355	-0.00577671	-0.00230768	-0.00291675
UCHL5	0.00361373	0.00381504	-0.00429985	-0.000596282	-0.00228378	-0.00377924	0.000469609	-0.002398
LINC00174	0.00292639	-0.00170948	-0.00114801	0.00175546	0.00169978	-0.00111705	0.000280314	0.000909098
GAS5-AS1	0.00320878	-0.00197995	-0.0027584	0.00328991	0.00231255	-0.00209941	0.00138422	0.00194818
CTSB	0.00697487	0.00136164	0.0107782	0.00506748	-0.00610747	0.0029517	-0.0124928	-0.00356934
SPRNP1	0.0032827	-0.0028704	-0.000975344	0.00230089	0.00221621	-0.00169968	0.00287546	-0.00153978
TEX9	0.00296573	-0.00275441	-0.000485017	-0.000322395	0.00438398	-0.000353107	0.000521056	0.00102971
LOC101930075 /// PKD1	0.00376706	-0.00092206	0.00322246	0.00721065	0.00160729	0.00240264	0.00345682	-0.00131847
CCNI	0.00300201	-0.00126995	0.00604935	0.00289144	0.00187278	-0.00179996	0.00429148	0.000217063
0	0.00315804	-0.00230587	-0.00197924	0.00310944	0.0028893	-0.00308337	0.0020875	0.00226617
ADCY1	0.00596221	0.0198857	0.00726391	0.00875345	-0.00395435	-0.00560371	0.0119108	-0.00837284
MTUS2	0.00402199	0.00254964	-0.000190291	0.00172431	0.00214315	-0.00505535	0.00143792	-0.00329201
0	0.00342117	-0.0016095	-0.00180399	0.00253417	0.00352936	0.00149674	0.00150904	-0.00203364
0	0.00264419	-0.00217536	-0.000170181	0.00183822	0.00312542	-0.00110505	0.00215454	-0.00016217
FAM86B3P	0.00380977	-0.00275018	-0.00092722	0.00444074	0.00135072	-0.000583994	0.00241996	-0.000593417
APLP2	0.00643416	0.00268525	-0.00286227	0.00237391	-0.0141262	-0.0120506	-0.00535443	-0.00404274
XIST	0.00321269	-0.00216546	0.000290543	0.00395459	0.000950396	-0.00305843	-0.000711305	0.00105924
FGF18	0.00259164	-0.00145571	-0.000975972	0.00264123	0.0015795	-0.00129399	0.000658988	0.000569718
C11orf57	0.00344212	0.000545324	0.00145047	-0.00355001	0.00212709	-0.000855347	-0.00051381	-0.000277167
LOC399884	0.00404214	-0.00233125	-0.00216481	0.00314684	0.00252778	0.00215468	0.00163542	-0.00146385
MMRN2	0.00294177	-0.00202999	-0.00276144	-0.000928415	-0.000487155	-0.00187705	-0.00331292	-0.00170638
CRTAP	0.00386215	-0.00150867	-0.00204476	-0.00130416	0.0011974	0.00220728	-0.000653247	-0.000751791
SAMD10	0.00399814	-0.00133906	-0.00194665	0.00324519	0.00136009	0.00070495	0.000784865	0.000363951
0	0.00512992	-0.00669686	0.0120552	0.00520004	-0.00831123	-0.0150135	-0.000203087	-0.00843425
0	0.00322395	-0.00225348	-0.00184911	0.00397015	0.00316994	-0.00119786	0.00177012	0.00220615
SREK1	0.0049355	0.00456237	-0.00154444	-0.00454117	0.00300536	-0.00797748	-0.00114258	-0.00354235
CSAD	0.00301209	-0.00350534	-0.000440849	0.00132573	0.00314854	-0.00230701	0.000104836	0.00072774
DR1	0.00409714	-0.000284766	-0.00186352	0.00127491	0.0023406	-0.000544056	0.00112875	0.00198741
0	0.00267938	-0.00211597	-0.00135961	0.00216213	0.00198361	-0.000651926	0.00187024	0.00147699
AADACL2	0.00284771	-0.00261735	-0.0025595	0.00199263	0.00387548	-0.00124822	0.00293406	0.00279653
MAN2A1	0.00495001	-0.0110662	0.0186827	-0.0207088	-0.0108409	0.0020648	0.0188853	0.00890901
FAM212B-AS1	0.00333187	-0.00228914	-0.000885332	0.00181894	0.00316202	-0.00133179	-9.72896e-05	0.00378015
TMEM254	0.00342816	-0.00254886	0.00182647	-0.0012161	0.00260362	0.000690339	0.0005146	-0.00246878
KIAA1147	0.00364108	-0.00651781	0.0148132	0.0103743	-0.00855517	-0.0060869	0.00356228	-0.0055096
CAMK2D	0.00384532	0.00156677	-0.00101253	-0.00118765	0.00197266	0.00043284	-0.00246552	0.00143222
FLCN /// PLD6	0.00412553	0.00181201	-0.0039393	-0.00419348	0.00482366	-0.00499046	0.000925824	-0.00520155
LINC01208	0.00297961	-0.00339064	-0.00243316	0.00312343	0.00345355	-0.00251351	-0.000639678	0.00362209
SLC9A9	0.0037036	-0.00429374	0.002205	-0.000856791	0.00475697	0.00143992	0.0017304	0.000598898
ZNF787	0.00350939	-0.000945255	-0.000464567	0.00395817	-0.000597918	0.00285201	0.0011143	-0.00401587
DDHD1	0.00458486	0.00310108	0.00174657	-0.00561407	-0.00181037	-0.00523333	-0.00279041	0.00061203
PRDM5	0.00284519	-0.00197104	-0.00136681	7.13627e-05	0.00217469	-0.00187866	0.000617487	0.00369037
GPATCH2L	0.00372824	-0.0017299	0.000605473	0.00107352	0.000710623	-0.00202804	-0.001535	0.00351088
RRAD	0.00233623	-0.00121632	-0.000397494	5.35325e-05	0.00430648	-0.000244479	0.00152755	0.000831232
ZNF618	0.00333179	-0.00256022	0.000445626	-0.000537369	0.000212435	-0.00358595	-0.00176244	-0.00200393
0	0.0027896	-0.00264641	0.00257412	0.000333046	0.00050546	-0.00344824	-0.00212432	-0.00264523
DCAF16	0.00546709	0.00291566	0.00315931	-0.01637	0.00192589	-0.00466305	0.00207978	-0.000778481
LOC440934	0.00506432	0.00936424	0.0019899	-0.00294128	0.0078972	0.000296992	-0.00811069	0.00266645
LOC100507540	0.00292113	-0.00163006	-0.00110988	0.00185134	0.00187572	-0.000820716	-0.000238398	0.000238246
USP27X-AS1	0.00299963	-0.0025225	-0.00105179	0.002027	0.00320953	0.000291969	0.00031258	0.000103545
RP4-635E18.8	0.00713814	0.00913633	-0.00850054	-0.0106021	-0.00168624	-0.00149054	0.00596502	-0.00670663
0	0.00296442	-0.00237044	-0.00132544	0.00264282	0.000806274	-0.00355053	0.00105326	0.00266032
UQCC1	0.00404904	0.000299702	0.00244041	0.00175217	0.00546585	0.00499825	0.00525963	-0.0010041
RORA	0.00326693	-0.00315784	0.00357826	0.00303407	-0.00161996	-0.0063933	0.000831634	-0.00363213
0	0.00251134	-0.00258075	-0.00163475	0.0016427	0.00182955	-0.00260851	1.48327e-05	0.00137898
TMEM127	0.00401201	0.00356893	0.00134067	-0.00344752	0.000460704	-0.000308655	0.00198304	-0.00616365
0	0.00260077	-0.00167286	-0.00151368	0.00220237	0.00242963	0.000762066	0.00141315	0.000205229
GAB3	0.00242158	-0.00160818	-0.000255237	0.00133239	0.00169319	-0.000788434	0.00134941	0.000205035
MGST1	0.00240974	-0.00111848	-0.00135099	0.00124593	0.00335306	0.000855236	0.00132914	-0.00094071
0	0.00354727	-0.00300764	-0.00262855	0.00330857	0.00239992	-0.00203868	0.000565549	0.00444789
0	0.00378777	-0.00262189	-0.00229785	0.00377524	3.65274e-05	-0.00397282	-0.000783997	0.001276
TRANK1	0.00358371	0.00363724	0.000382066	-0.000749767	0.0051225	-0.00317959	-0.000364134	-0.00485901
0	0.00304577	0.00314916	-0.00137212	-0.000172519	-0.0053611	-0.0027568	-0.00032953	-0.00433623
HTR7P1	0.0028832	-0.000887656	-0.00026375	-0.00244464	0.00770164	-0.00281082	0.000721474	-0.000603397
HIST1H2BC	0.00299805	-0.00335661	0.000897112	-0.00158897	0.0026975	-0.00145642	0.000655375	-0.000112146
UBASH3B	0.00305017	-0.00157504	-0.001284	0.00260853	0.00272812	-0.000240182	0.000738146	0.00141768
TRNP1	0.00762533	0.0129057	-0.000129557	0.00954566	-0.00370604	-0.00465958	0.00403625	-0.00296658
CHST14	0.00332853	-0.00372948	8.2863e-05	-0.00130953	0.00306456	0.00119652	-0.00154169	-0.000863774
DHX34	0.00388015	-0.00275795	-0.00183083	0.00381316	0.00118666	0.00114936	0.00162663	-0.00537347
0	0.00280517	-0.00324161	-0.000716691	0.00227339	0.00324066	-9.35521e-05	0.00307444	-0.00105134
0	0.00332489	-0.00200535	-0.00100437	0.00268091	0.000855577	0.000570695	0.00142622	-0.00184739
LOC100147773	0.00285291	-0.00211612	-0.000923016	0.00165524	0.00496124	-5.21512e-05	0.00256599	-0.000157911
LOC101926951 /// PCDH20	0.00414325	0.00316631	0.00585441	-0.00736972	0.00974226	-0.00313908	-0.00644815	-0.00158302
DLX6	0.00302347	-0.00609928	0.00426926	-0.00988737	0.0212406	-0.0112032	0.00216852	-0.00934692
LOC643733	0.0032181	-0.0026011	-0.00243618	0.00326775	0.00338101	0.000237657	0.00114853	0.00146782
LINC00473	0.00279418	-0.00124164	-0.00124925	0.0026761	0.00201207	-0.000690007	0.000873195	0.00138431
ERN1	0.00323641	-0.00208085	-0.00121013	-0.00264555	0.000797764	-0.000622753	-0.0030622	-0.00135203
HSPA4	0.00327095	7.6957e-05	0.00488993	0.00341854	-0.00852432	-0.0030226	-0.00195689	-0.0033891
RNF213	0.00193774	-0.00092593	-0.000280432	-0.000227804	0.00200769	-0.000206839	0.00104717	-0.000166361
LUC7L2	0.00465512	0.00133717	0.00020725	-0.00941662	0.00177115	-0.00145791	0.00160038	-0.00245331
LOC100506175	0.00420998	-0.00371779	-0.00243708	0.00467574	0.00366059	-0.000201955	0.00131447	0.00432833
NFKBIB	0.00408176	-0.00335578	-0.0043347	0.00100484	0.00249451	0.00247216	0.00414156	-0.00469648
SIK3	0.00568546	-0.00232894	0.00750391	-0.0114691	0.003228	0.003856	0.0145089	-0.00249688
SIK3	0.0062734	-0.00274479	0.0238979	-0.010836	4.49701e-05	0.0025892	0.0164043	0.0137721
LINC00938	0.00442867	-0.00298194	0.00430369	-0.0135268	-0.00342887	-0.00734884	-0.000211878	-0.0024766
CACUL1	0.00556558	0.00112047	-0.00079261	-0.00410123	0.00402913	0.00315728	0.000188769	-0.00259247
USP48	0.00505409	0.000268631	-0.00260731	-0.00842733	0.000566644	-0.00420863	0.00571791	-0.0014042
SFT2D1	0.0031198	-0.00418891	-0.000490064	-0.00124389	0.00634697	-0.000991652	0.00207688	-0.000305088
TBXAS1	0.00249361	-0.00186947	-0.0007974	0.00161951	0.000930199	-0.00263033	-0.00132903	0.00192485
SLC35F5	0.00557446	-0.00692098	0.00550518	-0.0163051	-0.000149398	0.000766834	-0.00914143	0.00441749
GEMIN8	0.00322315	-0.00172986	0.00230208	-0.00383493	0.00244746	0.00248254	0.00397858	-0.00315009
LMCD1	0.0021306	-0.0020089	-0.000838966	0.00153306	0.00351276	-0.0014365	0.000168284	0.00108663
LOC101928731	0.00258796	-0.00217812	-0.00167172	0.000733275	0.00345915	-0.000990405	0.000903237	0.00187044
ZBTB20	0.00826816	-0.0181138	0.00334646	-0.0135542	-0.0169574	-0.0134	-0.0125784	0.00900514
MS4A6A	0.00292059	-0.00339837	-0.00178692	0.000858138	0.00282112	-6.84461e-05	-0.00420564	0.00113993
GMEB2	0.00395007	-0.000164727	-0.00481611	0.000734507	-0.00139379	-0.0010288	-4.7884e-05	-0.00323407
S100A16	0.00669321	-0.0059931	0.000137141	-0.00542918	0.00288595	0.0129556	-0.00975324	-0.0106143
MAP3K2	0.00633721	0.00324448	-0.000867372	-0.00876207	-0.00237377	-0.00436901	-0.00154628	-0.0034823
LRRC37A2	0.00822437	-0.00232131	-0.000196807	-0.00416331	-0.0118735	0.000897804	-0.00271056	-0.0134717
NCS1	0.00883099	0.0124628	0.00829241	0.00871141	0.00646055	0.00979184	-0.00500078	-0.0212706
PTCD3	0.00504297	0.00205771	-0.000113548	-0.00352103	-0.00740884	-0.00514558	-0.00135437	-0.00369846
AC141928.1	0.00350624	-0.000638767	-0.00369477	0.00190134	0.00291836	0.00136982	0.00212697	-0.00223002
AGBL5	0.00293322	0.000334736	-0.00237487	0.000298628	0.00193015	-0.00262207	0.000953182	0.000549347
SRPK2	0.0051059	0.00382564	0.00480834	-0.00168907	-0.0028665	-0.00560263	0.00336393	0.00701416
0	0.00176532	-0.002322	-0.000733285	0.000996054	0.00366021	-0.00144971	0.000761063	0.00215495
UTP15	0.0027685	-0.000767429	-0.00121706	-0.00116646	0.00440702	-0.000283281	0.00232051	0.000819401
APPBP2	0.00807827	0.00690324	-0.00409138	-0.0102454	-0.0021942	-0.00469374	-0.000822225	0.0112816
ACOT4	0.00308662	0.00130966	-0.000435695	0.000478492	0.00431464	-0.000670639	-0.000159998	0.000699416
0	0.0036322	-0.00365407	6.64799e-05	0.00257784	0.00456433	-0.000489592	-0.000609942	0.00200838
SRSF1	0.00562087	0.00561398	-0.0127806	-0.00843307	0.000792976	0.00043936	0.00199146	-0.0132284
TRIOBP	0.00568159	-0.00676749	-0.00754816	0.00328671	-0.00733306	0.00310246	-0.00530397	-0.00314316
MIEF1	0.00408324	0.00185844	0.000830966	-0.00128087	0.000545592	0.00233245	-0.000394786	0.00448997
FARP2	0.00457341	-0.00284225	-0.00271766	-0.00111566	-0.000477465	0.000898449	0.00245986	0.00590184
INSM2	0.00382467	-0.000484257	0.000242706	-0.000612316	0.00262257	-0.00938391	0.00165952	-0.00210286
CHCHD3	0.00297653	-0.00252766	0.000813595	0.00295227	0.0040073	-0.00138852	0.000418138	0.000637488
0	0.00231629	-0.00215015	-0.000669738	0.000672735	0.00257471	-0.00142697	0.00105237	0.00155011
0	0.00317342	-0.00170777	0.000774647	0.00453308	-7.02169e-05	-0.000109329	0.000445349	-0.00186834
EDIL3	0.0125679	-0.00492639	-0.00198568	-0.00882606	-0.00727059	-0.00304152	0.0125657	0.00605624
0	0.00288045	-0.00300035	-0.00208507	0.00344335	0.00329266	-0.00287697	0.000986383	0.00345527
CTBP1	0.00935322	0.0115088	-0.000707152	-0.00250021	-0.0072405	0.00399411	-0.00276915	-0.00115455
0	0.00391845	-0.00269266	0.00151625	0.00714918	-0.000525773	-0.00262849	-0.000234584	0.000249581
CTD-3025N20.3	0.00343606	0.00401471	0.000596297	-0.0057231	0.00293587	-0.00490012	-2.11005e-05	0.000383988
0	0.00345301	-0.00255973	-0.00101654	0.00268262	-0.00103809	-0.00420374	0.000185637	0.000121202
0	0.00371584	-0.00347038	-0.00186773	0.00506476	0.00314867	-0.00208193	0.000706743	-0.00142196
0	0.00233469	-0.00182721	-0.000824826	0.000547849	0.000704166	-0.0018932	-0.000925097	0.00135117
0	0.00360426	-0.00319731	-0.00129057	0.00444155	0.00344897	-0.00270362	6.06232e-05	0.00366419
TMEM56	0.00496177	0.00890612	-0.000937223	-0.00259765	-0.00506868	-0.0062838	-0.00781005	-0.00683503
CIZ1	0.00446636	-0.00223504	-0.00178579	0.00382386	-0.000446019	0.00286622	0.00509192	-0.00291899
CIZ1	0.00553611	0.0026026	0.00235844	-0.00129195	-0.00301533	0.00865566	0.00268758	-0.0077942
0	0.00260687	-0.00338856	0.000626949	0.00195719	0.00136284	-0.00363986	0.000437297	0.000594162
SUV420H1	0.00445268	-0.000261727	-0.000366578	-0.00484153	-0.00357907	-0.000454818	0.00327119	-0.00309185
ING3	0.00295478	-0.000225475	-0.00202523	0.00144264	0.00294948	-0.00111952	0.0016383	0.000304088
RHEB	0.00372962	-0.000503297	-0.00273126	-0.0012005	0.0020093	-0.000924581	0.000891874	-0.00149609
0	0.00300874	-0.00166604	-0.00130205	0.00198716	0.00349759	0.00275244	0.00323418	-0.00147364
PARP14	0.0046678	-0.00543994	-0.00206252	-0.00629818	0.00170363	0.00533878	-0.00846323	-0.00883607
KLLN	0.00317548	-0.00254835	-0.00099953	0.0025474	0.0021285	-0.00185564	-0.000728396	0.00267321
0	0.00265507	-0.00259939	-0.000761024	0.00198599	0.000225633	-0.00206801	7.4213e-05	-0.00214874
SOBP	0.00213891	-0.000995989	-0.00017121	0.000774254	0.0031878	0.000392259	0.00165938	0.000394473
DLG2	0.0082274	0.00934308	0.0044915	-0.0087117	0.007412	0.00370675	0.00472941	-0.0107132
0	0.00341055	-0.00220645	-0.00224175	0.00308255	0.00390316	0.000261362	0.00129043	0.00229332
BC022047	0.00844497	0.00956816	-0.000121042	-0.000419751	-0.00139813	-0.00422733	-6.15043e-05	-0.00725602
CCDC40	0.00278915	-0.00239085	0.000196099	0.00115007	0.00448121	-0.000213796	0.00270022	-0.00398167
0	0.00328112	-0.00174499	-0.000929117	0.00220964	0.00380454	0.000950761	0.000942237	-0.000100792
FAS-AS1	0.00235364	-0.00183041	-6.93605e-05	0.000898772	0.00303507	0.000922779	0.00025205	-0.000354142
ABI2	0.0100209	0.00507086	0.00368314	-0.00623028	0.0127508	-0.00532361	-0.0018796	-0.00859613
PQLC1	0.00259986	-0.00171001	-0.0013845	0.00164855	0.00320343	0.00167741	0.00143711	-0.00184545
ZBTB20	0.00767772	-0.0167249	0.0118511	-0.00221053	-0.0164528	-0.0113727	-0.00224937	-0.0131165
ILDR2	0.00299723	-0.00258827	-0.000425542	0.00417109	0.00355255	0.000759323	-4.62777e-05	0.00554701
GLCCI1	0.00612187	0.0102865	0.00449515	-0.00678721	0.00427586	-0.0194207	-0.00158596	-0.00567792
FLT1	0.00599693	-0.00791269	-0.0102176	8.09044e-05	-0.00941006	0.000627933	-0.007849	-0.00717575
TMEM178A	0.0092477	0.01751	-0.00228795	0.00161366	-0.00493247	-0.00496275	-0.000706185	-0.00733051
0	0.00370693	-0.00191992	-0.00163961	0.00327185	0.00249591	0.0019553	0.00164697	-0.00158619
RHO	0.00336661	-0.00207816	-0.00224347	0.00253783	0.00090664	-0.00182328	-0.000266469	-0.000453727
GET4 /// RP11-449P15.2	0.00269324	-0.00128431	-0.000805893	0.0023867	0.00273667	0.000397677	0.000928014	0.000401301
RP4-781K5.2	0.00352354	-0.0029171	-0.000356133	0.00193381	0.00366467	0.00162765	0.00196472	-0.00186051
NCK1-AS1	0.00299592	-0.00184696	-0.00162247	0.00116688	0.00301087	-0.000705911	0.000624953	0.00184716
0	0.00216297	-0.00213307	-0.000958286	0.00112771	0.0025512	0.000295695	0.00164555	-0.000623917
0	0.00291471	-0.00155476	-0.00115463	0.00217335	0.00168282	-0.000956296	0.00213698	-1.50918e-05
TSPAN5	0.00825959	0.0153031	0.00121498	-0.00385309	-0.00408565	-0.00158151	0.0110141	-0.00115549
0	0.00269878	-0.00180215	-0.00183033	0.00167206	0.00357675	0.00129375	0.0025574	-0.000995175
RSPRY1	0.00410288	0.00177651	0.00653331	-0.00910777	0.00160921	-0.00157559	-0.00193829	0.00152993
IMPG2	0.00347511	-0.0023478	-0.00238676	0.00303134	0.00193942	-0.000107263	-1.82433e-05	0.0017555
LMNA	0.00680678	-0.00824165	-0.00327238	0.00736046	-0.00315498	0.00382279	0.00198385	-0.00739397
CXorf38	0.00380168	-0.00301376	-0.000929679	-0.00492025	0.00302104	-0.0021624	-0.00212403	-0.00100746
FLII /// LLGL1	0.00223123	-0.00151311	0.000156524	0.000369816	0.00310071	-6.25844e-05	0.00165837	-0.00194178
LOC100506472	0.00272811	-0.00235718	-0.00116694	0.0014928	0.00216099	0.000341781	0.0013112	0.00133967
C11orf24	0.00459239	-0.000558286	-0.00267048	-0.00184343	-0.000943924	-0.00174288	0.00403958	0.00508488
LINC01106 /// LINC01123	0.00254199	-0.00153417	-4.42672e-05	0.00192142	0.00302792	-0.00111836	0.000267743	-7.70059e-06
0	0.00383625	-0.00360402	0.00161508	0.00367529	0.000895952	-0.00155202	0.00428977	-0.00408439
PGK1	0.00459891	0.00882355	0.00521935	-0.00789365	0.00607198	-0.00553719	-0.00262617	0.00480871
DHODH	0.00250878	-0.00185926	-0.00140105	0.000918965	0.000194034	-0.00222897	0.00184122	-0.000980231
CLCN4	0.0039835	-0.0011884	0.0056791	-0.00181591	0.00512968	-0.00286325	0.0093704	0.00462158
RP5-991G20.4	0.00266042	-0.00210084	-0.00118981	0.00154274	0.00304132	-0.000796856	-0.000389393	0.00181811
0	0.00369629	-0.00239243	-0.00247129	0.00268377	0.00174972	-0.00272618	-0.000885381	-0.00170377
ALDH3B2	0.00265272	-0.0011133	-0.00101451	0.00253586	0.00243722	0.000782448	0.00125178	-0.000972784
LOC102724788 /// PRODH	0.00761252	-0.00245488	-0.00931453	0.000180324	0.000938477	0.0194609	-0.0135013	-0.010123
PNKD	0.00567904	0.00465412	-0.00547628	-0.00845387	0.00111076	0.00211171	0.00357978	-0.00772531
0	0.00288006	-0.0027111	-0.000317841	0.00318867	0.0034478	-0.000703487	-7.33495e-05	-0.00151642
LEO1	0.0043069	0.00190862	0.00249751	-0.00374672	0.000901468	-0.00574474	0.00193092	-0.00121318
0	0.00359075	-0.00618408	0.0030782	-0.00868958	0.00223049	-0.00325317	-0.00329617	-0.00515569
ZNF766	0.00430163	-0.0010333	-0.00165238	-0.00625462	1.00461e-05	-0.0060913	0.000819377	-0.00366624
WWTR1	0.00464382	-0.0053946	0.00114115	0.00463626	-0.00119581	0.0027704	-0.00387939	0.00167447
IVD	0.00562911	0.000760829	-0.00511659	-0.00766036	0.00190913	0.00398077	-0.000694649	-0.00889958
TRIM22	0.00509814	-0.00884827	0.000622291	-0.00937523	0.000681025	0.00890333	-0.0254062	0.00481883
FTH1	0.0114836	-0.00583426	-0.00745406	-0.00123758	-0.0071502	0.00614582	-0.00877035	0.000814635
ANGPT2	0.00370613	-0.00635676	-0.00202391	0.00214946	-0.00621726	0.000457548	-0.00484128	-0.00722464
ZNF404	0.00410031	-0.000776249	-0.00346242	-0.0139126	-0.00206372	-0.00232613	0.00176882	-0.00165319
RNF187	0.00821303	0.0173101	-0.00826534	-0.000950333	0.00562442	0.00762762	0.011234	-0.00827634
SIGIRR	0.00424863	-0.00286641	-0.00226225	-0.00216073	3.89491e-05	0.0069866	0.00045145	-0.00190781
FAM83A	0.00340345	-0.00151604	-0.000420118	0.00233037	0.000693676	-0.00272394	0.00194557	-0.000483907
0	0.00307442	-0.00416054	-0.000867964	0.00164351	-0.00027222	-0.0047442	-0.00039452	0.000782792
PDLIM7	0.00431698	0.00171838	0.0012613	0.000560955	0.00499502	-0.000914402	-0.000685583	-0.00633253
PDLIM7	0.00296105	-0.00212032	-0.0011352	0.00322712	0.00110546	0.0013977	0.00364861	-0.00627544
TMEM200A	0.00309886	0.00237233	0.00157092	-0.00105936	0.00434002	0.00533758	-0.00631285	0.00336008
L3MBTL3	0.00302754	-2.69429e-05	-0.000746942	-0.000265608	0.00208489	-0.0029787	0.000143937	0.00106731
0	0.00423478	-0.00596121	0.00107779	-0.0120214	-0.00583787	-0.00745436	0.00434747	-0.00309306
0	0.00355272	-0.00161768	-0.00149002	0.00420284	-0.000832028	-0.00230355	-0.000337386	0.00180131
GLS	0.00224552	-0.00177753	9.40121e-05	0.000949582	0.00247753	-0.000250828	0.00176374	0.00123091
DNAJC22	0.00302346	-0.00264979	-0.00096795	0.00119534	0.00194039	-0.00153521	0.00114994	0.00141148
ITFG1	0.00307942	0.000866879	-0.000959268	-0.00397504	0.0022366	-0.000642741	0.000351874	-0.00181139
PTPN4	0.0031242	0.0023575	0.00199829	-6.14333e-05	0.00308575	-0.00288534	-0.000534918	0.00331647
LIPH	0.00221418	-0.00134254	-0.000870719	0.00276856	0.00319362	-0.000923963	0.0011848	0.000499865
HFE	0.00302707	-0.00313681	0.000122492	0.00148185	0.00220618	-0.0020611	0.00129659	0.00432392
MBNL1-AS1	0.00296533	-0.000842735	-0.00108027	0.000841007	0.00238963	-0.000258544	-0.000159589	-0.00219898
SLC8A1	0.00323764	-0.00143148	0.00512358	0.000840199	0.00561418	-0.00620872	-0.000448286	0.00457886
SEC22C	0.00403265	-0.000351865	0.00139064	0.00193157	0.00147644	0.00163024	0.0013701	0.00117995
HAUS8	0.00243866	-0.00105569	-0.000784217	0.00028178	0.00215238	-0.000956792	0.000396479	-0.00126397
ABCA6	0.00335658	-0.00450007	-0.001868	-0.000577965	-0.00014559	-0.00281771	0.00179214	0.00192015
DHX57	0.0040336	0.000425559	-0.00124809	0.000186852	0.00192777	-0.00244746	0.000397264	-0.0012385
0	0.00306757	-0.00260504	-0.000806699	0.00115912	0.00351797	-0.00305981	0.00149037	0.00170311
LMO7	0.00306005	-0.00181775	0.00219382	0.0026395	0.0019662	-0.00290086	2.00274e-05	0.00140795
TMEM173	0.00391859	-0.00392785	-0.000725087	-0.00112787	0.00511928	0.000350348	-0.000665735	-0.00358723
ERGIC2	0.00458768	-0.00097155	0.0051108	-0.00124608	0.000244069	-0.00303746	-0.000557394	0.000903885
SSBP3	0.00774544	0.0230218	0.00102704	0.0077869	-0.00553737	-0.00550777	0.000162468	-0.0117709
BAZ1A	0.0037298	-0.00606763	0.00259394	0.00326478	-0.00742942	-0.0056874	-0.00351378	-0.000348202
USP31	0.00686516	-0.0100077	0.0388062	0.0060323	-0.0239894	-0.0165832	0.0100941	-0.0103052
FAM26E	0.00296536	-0.00233242	-0.000865363	0.00317124	0.00322485	-0.000601728	-0.00122089	0.00328262
LINC00963	0.00310305	-0.00231129	-0.00290351	0.00064844	0.000312625	-0.000540763	0.0022305	-0.00382841
SREBF2	0.00483088	-0.00420095	-0.00241765	0.0051093	-0.00130414	0.00122844	0.000387029	0.00116855
LSM4	0.0072755	0.00262768	0.0151758	0.00250719	0.00871756	0.0170896	0.00478453	0.00273952
NACC2	0.0095258	-0.00895735	-0.00116318	-0.00102585	-0.014916	0.00787902	-0.00476959	-0.00214597
ZNF138	0.00381874	-0.000738291	0.0049824	-0.00384544	0.00177065	-0.00785255	-0.000995793	0.000341015
TRIM3	0.00331634	0.00231578	0.00184616	0.00402564	-0.000518939	0.000608147	0.00420524	-0.00291378
TRIM3	0.00465055	0.00578554	-0.00542915	0.00455663	-0.00536261	-0.000524859	0.00540612	-0.00369273
0	0.00324933	-0.00130954	-9.6673e-05	0.00122787	0.0015229	0.000503783	0.000941236	0.00164661
0	0.00307684	-0.00576358	-0.000745928	0.00188311	0.000446963	-0.0074384	-0.0017912	0.00676989
NEGR1	0.00533855	0.0137819	0.0212939	0.0106439	-0.00142806	-0.00601893	-7.69047e-05	0.00281813
COA5	0.00463372	0.0014186	-0.00115008	-0.0120593	-0.00237071	-0.00247004	-0.00019567	-0.00573046
LINC00662	0.00342857	-0.00281183	0.000322665	0.00310242	-0.00185385	-0.00120574	0.000242768	0.00107094
KCTD1	0.00584568	0.00595103	0.0150999	0.00163196	0.0113097	-0.0095291	0.00329842	-0.0075964
TMEM43	0.00343284	-0.00129239	0.00711509	-0.00334518	0.00208317	0.00191236	-0.00119382	-0.00207184
INTS10	0.00584308	0.00659216	-0.00274428	-0.0125121	-0.000371498	0.00277163	0.00148276	-0.0154726
INTS10	0.00439522	-0.00281273	0.00250126	-0.00766412	-0.00114951	0.00373602	0.0035491	-0.00452981
FBXL17	0.00676027	0.00428368	0.000839608	-0.00586867	0.00314422	-0.012069	-0.00252163	-0.00801156
CTC-550B14.7	0.00294491	-0.00162745	-0.000271203	0.00178795	0.00189142	-0.00230812	-0.00034649	0.00110654
MTERF4	0.00346852	0.00161093	-0.0025954	-0.00172707	-0.000294971	0.000644212	0.000779995	-0.00311767
TRIM35	0.00388958	-0.00275398	0.000625521	-0.00261393	0.00512963	-0.00347728	0.00318017	0.000448349
HBE1	0.00280467	-0.00304571	-0.0020342	0.00188393	0.00219001	-0.00327456	0.00112262	-0.000727735
0	0.00249188	-0.00163762	-0.00226291	0.000939395	0.00292202	-0.000738191	0.00373741	0.000904518
RP11-753A21.1	0.00281263	-0.0018843	-0.00176581	0.00183887	0.00280338	-0.00130038	0.00277218	-0.00122048
TWISTNB	0.00366877	0.00179494	0.000691984	-0.00655862	0.000729153	-0.00369044	-0.000560238	-0.002876
HEG1	0.00524725	-0.00707859	-0.00142776	-0.00107791	-0.00505731	-0.00269551	0.00204666	0.00302776
KMT2C	0.00699274	-0.00978303	0.0219049	-0.00543756	-0.00973116	-0.00296459	0.000241604	-0.0147998
0	0.00282888	-0.00439106	0.00440047	-0.00256737	0.00301815	-0.00594199	-0.00279651	-0.00173431
ZNF281	0.00581829	-0.000652351	-0.000346379	-0.015364	-0.00792823	-0.0189206	0.00893741	-0.00310061
LINC00867	0.00273907	-0.00188579	-0.000959064	0.00190199	0.00265769	-0.00173592	0.000580866	0.00217655
RPS15A	0.00415324	0.00289994	-0.00511263	-0.00327294	0.00517769	-0.00111877	-0.00157767	-0.00683024
INPP4A	0.00880488	0.0172019	0.00731199	-0.00593205	0.00848894	-0.0129281	-0.00785409	-0.0045654
DLEU2 /// MIR15A	0.00303718	-0.00274952	-0.00138343	0.00258523	0.00319606	-0.000696608	0.00182814	0.00125017
FBXO45	0.00539417	0.00156029	0.0107259	-0.00519113	0.000406981	-0.000481711	0.00851479	0.000690255
NCAM1	0.0111707	0.00766835	-0.0109074	0.00188127	-0.00754894	0.00396106	-7.70042e-06	0.000312749
TPPP	0.00484933	-0.00135829	7.35828e-05	-0.00163334	-0.00181713	-0.00449736	0.0010066	-0.00217702
ICAM2	0.0050622	-0.00627234	-0.0111036	-0.00182231	-0.00932028	0.0101102	-0.010702	-0.0179437
0	0.00468097	8.33344e-05	-0.00564676	0.00295299	-0.00728926	-0.00297455	-6.58092e-05	-0.00704977
CEP170 /// CEP170P1	0.00620111	0.00020071	0.0116199	0.00414055	-0.0122663	-0.00128755	0.00496173	0.00548395
HNRNPC	0.00505129	0.00257633	0.00244237	-0.0108003	0.00470297	-0.00705198	-0.00194693	-0.00169127
DENND2A	0.0041572	-0.00421796	-0.00380801	-0.00106463	-0.00162691	0.00299694	7.69497e-05	-0.00133422
CDC42BPA	0.00385758	-0.0018969	-0.00394613	0.00220267	-0.000443186	-0.00248286	0.000493692	0.000174103
AGPS	0.00400765	-0.00220326	0.00349554	-0.00692052	0.000965846	-0.00683651	-0.000795177	0.00474158
FAM104A	0.00508395	0.00228722	0.000472006	-0.00935267	0.00194598	-0.00454163	-0.00346599	-0.00538313
AC007362.3	0.00217855	-0.00163828	-0.000539605	0.00205211	0.00258217	-0.000796432	0.000765973	0.00159021
AC007362.3	0.00259232	-0.00184288	-0.00100288	0.00197965	0.00349341	-0.00167894	0.00074713	0.00140238
USP40	0.00297931	-0.00260368	0.00184651	0.00210406	-0.0042672	0.000245559	0.00114589	-0.00460756
UNC5B	0.00429467	-0.00280115	-0.00163486	-0.00123999	-0.00411168	0.00307578	0.00770231	0.00150403
STARD13	0.00501071	0.00185019	-0.000872262	0.00149615	-0.00501334	-0.0032536	0.00295133	0.0003834
SAT2	0.00641622	0.00454245	-0.00134472	-0.0120784	-0.00213676	-0.00165699	0.00958952	-0.0179725
SERAC1	0.00385632	0.00240832	9.27665e-05	-0.00148085	0.000499494	-0.00527292	-3.72541e-05	0.00245208
DLX6-AS1	0.00349665	-0.00010119	-0.000438622	0.000140298	0.00483296	-0.00312486	-0.00197008	0.00258372
MATR3 /// SNHG4	0.013442	0.00620586	-0.00547488	0.00378048	-0.00447542	-0.000715544	-0.00261328	0.0038451
FSTL5	0.00467202	0.0105689	0.000589832	-0.0104215	0.0123814	-0.0102454	-0.002981	-0.00653826
GDF15	0.00233091	-0.00204934	-0.000695313	0.00106671	0.00306142	-0.000434385	0.00230064	0.000214771
PVRL3	0.00385881	0.00238815	-0.000873095	3.01625e-06	-0.00170143	-0.00304846	0.000701664	0.0110689
MGST3	0.00289911	-0.00341681	-0.000214861	0.00219123	0.00295055	-0.00134794	0.000332001	0.00304346
CTDSPL	0.00234981	-0.00167843	-0.00140908	0.00339174	-0.000339495	-0.00102308	-0.0013695	0.0015306
RABGGTB /// SNORD45A /// SNORD45B /// SNORD45C	0.00684741	0.00563961	-0.00355197	-0.0120221	-0.00577253	-0.0141565	-0.00415616	0.0215995
KIAA0391 /// PSMA6	0.00447073	-0.000633034	-0.00453461	-0.00394521	-0.00242326	-0.00221621	-0.00340021	0.00337762
MAPK1	0.0114599	0.00455299	0.00842405	-0.00466475	0.0068115	0.00119977	-0.00751562	-0.010353
C1orf226	0.00303168	-0.00177794	-0.00154976	-0.000220261	0.0020776	-0.000556926	0.00056791	6.30016e-05
SUOX	0.00435861	0.00245848	-0.00512535	-0.00108475	-0.00644349	0.000466681	0.000398984	0.000538902
0	0.00309836	0.000656214	-0.00081122	0.00230825	0.00152017	-0.0016879	-0.00194731	0.00154706
0	0.00340899	-0.0015433	-0.00185659	0.00216689	0.00230274	-0.00152523	0.000346253	0.00108647
KLF3	0.00609543	-0.00719999	0.00784757	-0.0203055	-0.000517169	-0.005967	-0.00553043	0.00119694
ZNF546	0.00316992	-0.00250402	-0.00181685	-9.45849e-05	0.00324027	-0.00168296	0.00251108	0.000886991
PRKACB	0.0127493	0.00766542	-0.000929375	0.000875038	-0.00202488	-0.00135714	0.00326743	0.00521431
FBXO3	0.00340995	0.00245453	0.00136591	-0.00363805	0.00324392	-0.00178465	-0.00182908	0.000778814
0	0.00361753	0.000863676	-0.000392227	0.00175802	0.00222458	0.000298346	-0.0015431	-0.00238563
CTSB	0.00845804	0.00210524	0.0204181	6.35965e-05	-0.000471881	-0.00300696	-0.00452287	-0.0117946
IFIT2	0.00610566	-0.00484731	-0.00201802	-0.0102563	-0.00672898	-0.00209025	-0.000367845	0.00426287
0	0.00290984	0.00200065	0.00135834	-0.00194753	0.00155016	-0.00524306	-0.00242327	0.000213349
ZCCHC24	0.0102427	-0.0129086	-0.0157811	-0.0093419	-0.0165322	0.00791256	0.0116893	-0.00669528
MED27	0.00412229	0.00345739	-0.00661224	-0.000731112	-6.65159e-05	-1.54229e-05	0.000640633	-0.00125837
SNX5	0.00842522	-0.00591553	0.0127065	-0.00586863	0.00556138	0.00212974	-0.00383025	0.00154524
SNX5	0.00326317	-0.0012338	0.000427577	0.00141233	0.00297583	-0.00106064	0.0008202	0.000305778
SLAMF1	0.00354997	-0.00223421	-0.00146074	0.00444812	0.00123115	0.000549311	-0.00084105	0.00156591
FBXO10	0.00405525	0.000808477	-0.00112749	0.000803358	0.00165354	-0.00435557	-0.000129828	-0.00157497
TDRD10	0.00409148	-0.00320169	-0.00182658	0.00385976	0.00253324	9.66096e-05	-0.00183156	0.00266578
ANAPC7	0.00607048	0.00125141	-0.00625857	-0.00625733	-0.000595507	-0.000214399	0.0059961	-0.00951415
SPTBN1	0.00525566	-0.0122667	0.00499997	-0.00188884	-0.00828831	0.000214119	0.0093964	0.00429658
0	0.00280973	-0.00253839	-0.00198908	0.00204751	0.00261818	-0.000287154	0.000305185	0.00238511
0	0.00362749	-0.00385564	0.00254964	0.00356433	-0.00101948	-0.00388664	-0.00173055	0.000791697
MUC20	0.00418545	-0.0022716	-0.00232623	0.00339752	0.000803788	-0.000480304	0.00197096	-0.00398482
PLD1	0.00376502	-0.00399057	-0.000311267	-0.0080525	-0.0106083	-0.00280098	0.0112154	0.0014397
BNIP2	0.00590522	-0.00409383	-0.00271838	-0.00885776	-0.00171461	-0.00228543	-0.00635014	0.000154617
SLFN5	0.00369899	-0.00171044	-0.00196807	0.00167377	0.000175269	-0.00138458	-0.0002852	0.00212534
MFSD6	0.00925366	0.012315	0.0038487	-0.00991587	-0.00448847	0.00267822	0.0185965	0.00382866
GLRX5	0.00821648	0.0042812	-0.00206104	-0.000648744	0.00567362	0.00129064	-0.000482962	5.46191e-05
PKNOX1	0.00411079	0.000925687	-0.00414344	-0.00071148	0.000208516	0.00196654	-0.00197679	0.00247255
C16orf72	0.00401349	0.0021776	0.00173384	-0.00414064	0.00151281	-0.00459952	-0.00274217	-0.00400223
IFNAR1	0.00475217	0.00163371	-0.00277911	-0.00653389	-0.00108347	-0.00203554	-0.00242945	-0.00645324
0	0.00384331	-4.97959e-05	-0.00292127	-0.00300152	-0.00818749	-0.00656088	-0.00570031	-0.00342158
SSH3	0.00423358	-0.000439705	-0.00597917	0.00050399	-0.00533207	8.86649e-05	0.00141456	-5.96135e-05
GPD1L	0.00643205	0.0183925	-0.00368565	-0.000817011	-0.00350936	0.00464783	0.00435714	-0.00238154
UBXN10	0.00446417	-0.00310955	-0.00250931	0.00335143	0.00467195	3.96809e-06	0.00273474	-0.00084201
RP11-722E23.2	0.00340324	-0.00228621	-0.000977994	-0.00361707	0.00333664	-0.00412111	-0.000922144	-0.00135587
0	0.0036978	0.00101443	-0.00188465	-0.00139085	-0.00197669	-0.00098353	-0.00351626	-0.00320904
XAF1	0.00470338	-0.0035677	-0.00462994	-0.00683364	-0.00519348	-1.10922e-05	-0.00868274	-0.00527291
VASH1	0.0036573	-0.00215338	-0.001263	0.00233624	0.00284193	0.000155207	0.000455349	-0.00112488
MEF2A	0.00908344	0.0108706	-0.00164628	-0.000248588	-0.00296473	-0.00262637	-0.000861837	0.00477709
SPTSSA	0.00514487	-0.000744531	-0.00498656	-0.00634731	-0.00199058	0.00110169	-0.00528345	0.00411348
0	0.00314361	-0.00229566	-0.00065463	0.00189002	0.00412939	-0.000614443	0.00139879	0.00180532
PJA2	0.0110568	0.00706832	0.0237543	0.00555875	-0.00386183	0.000175457	-0.00253329	0.00805336
AP1G1	0.00418831	-0.00162887	0.00303039	0.000214029	-0.00100351	-0.000357981	-0.00149906	0.00145857
MUM1	0.00424294	-0.0044746	0.00675377	0.000676797	-0.00828941	-0.00580786	0.00412889	-0.0103737
USP30-AS1	0.00411637	-0.00194738	-0.0028079	0.00570923	0.0017325	-0.0012617	0.0010374	0.00143325
GSPT1	0.0063086	0.000753868	-0.000343906	-0.00562387	-0.0064196	-0.00300098	0.00292649	-0.00925155
MISP	0.00390067	-0.00338383	-0.00234708	0.00453862	0.000834917	-0.000228659	0.00219431	-0.00231676
RAB11FIP1	0.00327748	7.80791e-05	-0.00269869	0.00151374	-0.00195062	0.0010471	-0.0041188	-0.000500225
PCAT19	0.00304324	-0.00290285	-0.00127982	0.000858788	0.00103044	-0.00140808	-0.000267274	-0.000940835
WISP1	0.00213865	-0.00177577	-0.000708081	0.000603164	0.00287462	0.000387576	-0.0016618	0.00196489
UBE2Z	0.003843	-0.00498791	0.0030665	0.00416624	-0.00122996	-0.000697119	-0.000186199	-0.000787514
ADAM12	0.00270854	-0.00275549	-0.001057	-0.00100068	0.00265578	-0.00141922	-0.000551403	6.16048e-06
COMMD7	0.00616185	0.00882928	-0.00739959	-0.00649183	-0.00453906	0.00752287	-0.000792276	-0.0154224
SLC7A1	0.00690045	0.00289242	-0.00757376	0.00303514	-0.00963304	-0.00175455	-0.00261708	-2.56355e-05
PAPPA	0.00314401	-0.00278507	-0.00167229	0.00284431	0.000752032	0.000205541	0.00136537	-0.000813747
PTCHD1	0.00303126	-0.000627722	0.00107483	-0.00155991	0.00198148	0.000894711	-0.00320961	-0.00327337
SMIM11	0.00669033	0.0065716	-0.00221809	-0.00186198	0.00428814	0.000761666	0.00267582	0.00890528
LMF1	0.00360248	-0.00227785	-0.00287427	0.0044159	0.000906814	0.000821732	-0.00127629	0.0017955
WFDC21P	0.00296912	-0.00220225	-0.00196045	0.0017484	0.00253212	-0.000474927	-0.00127175	0.00210416
CALCOCO2	0.00406698	-0.00201813	-0.00219991	-0.00313452	-0.0019398	0.000385702	-0.00113762	-0.00246581
EHBP1L1	0.0031396	4.71596e-05	0.000878162	0.00274143	0.000819905	0.00315203	-0.000531855	-0.00162138
KLF11	0.00319953	-0.000443654	-0.00201142	-0.000379455	-0.000960668	6.26342e-05	-0.00203616	0.00223285
FFAR4	0.00283587	0.000511307	-0.000852324	0.0026593	0.00193447	0.00242856	0.000399371	-2.68548e-05
QKI	0.00489726	-0.0041327	-0.000192571	-0.00330244	-0.00798955	0.00226697	-0.00290712	0.0136987
JAM3	0.00856855	-0.00405779	-0.0104872	-0.00707988	-0.0127148	0.00175801	0.0155559	0.00406435
FLT1	0.00508106	-0.00706351	-0.00616626	-0.0024165	-0.00607601	0.00283466	-0.0173671	-0.0150906
FLT1	0.00588315	-0.00971217	0.00132372	-0.00383141	-0.0153782	0.00353131	-0.0226667	-0.0231373
HHIP-AS1	0.00432565	-0.00230768	-0.000204165	0.000195017	-0.00114102	0.00130694	0.00213904	0.00131355
EMC7	0.00311226	-0.00280234	0.000151138	0.000213232	0.00589634	-0.000564904	0.000566239	0.00135952
CTA-384D8.35	0.00250563	-0.00141471	-0.000249242	0.00137615	0.00262358	-0.000337245	0.00109475	0.000174881
TRIM2	0.00972684	-0.000322722	0.000372449	0.00502408	-0.0289986	-0.0130317	0.00930333	0.00458764
SAMD4B	0.00607255	-0.0034938	0.003611	0.00846527	-0.00538943	0.00508619	0.00507321	-0.00657863
HEATR1	0.00334469	-0.00206329	-0.00141894	-0.000469815	0.00409495	-0.00394257	0.000393964	0.00166181
COBLL1	0.00284647	-0.00167925	-4.88088e-05	0.0031533	0.00281003	0.000257289	0.000890383	0.00116519
CAV2	0.0028026	-0.00229126	-0.00216562	0.00130301	0.00216462	-0.000766902	0.00120975	-0.00259649
SIDT2	0.00629507	0.0029358	-0.0152025	-0.00927916	-0.00866853	-0.00106898	-0.00215701	-0.000893118
DAPP1	0.00436868	-0.00352852	-0.00333787	0.00430901	0.00223888	-0.000780581	8.11859e-05	0.00241546
ARID5B	0.00247626	-0.00186083	-0.00107901	0.00161442	0.00225022	-0.00126222	0.00128764	0.00128476
LOC102723954 /// MESDC2	0.00286976	-0.00400153	-0.000603552	0.000722222	0.00398368	-0.00210022	0.0020441	0.00269975
LOC102723954	0.00338651	-0.00280268	-0.0014686	0.0028841	0.00234541	0.000180441	-0.000123962	0.00136138
0	0.0035297	-0.00201624	-0.00384447	-0.00213472	-0.000215378	-0.00381141	-0.000592884	-0.00263449
ZNFX1	0.00594093	-0.00139103	-0.00124269	-0.00360799	-9.71487e-05	0.00228779	0.000431528	-0.00529851
EMP1	0.00331168	-0.0041826	-0.00112457	0.00106212	0.000700609	-0.000794198	-0.00339073	-6.03542e-05
OXLD1	0.00362573	0.00165218	-0.00405405	-0.00148683	0.00120603	0.000947507	0.00158662	-0.000126211
FAM124A	0.00483278	-0.00244369	-0.00594946	-0.0191971	-0.0116455	0.0021008	0.0223008	0.0026487
TCF12	0.00382692	-0.00264521	-0.000624145	-0.00588526	-0.00287858	-0.00501227	0.00345683	0.00173876
EYA3	0.00398825	0.000780842	-0.00131273	-0.00300253	-0.00219643	-0.00154834	-0.00185963	-0.00437546
0	0.00356595	-0.00411741	-0.00239797	-0.00244074	0.00150422	-0.000150703	-0.00286277	-0.00124937
NFATC2IP	0.00397936	-0.00213252	-0.000866395	0.0027983	0.000362143	-0.00094563	0.000775103	0.00270005
ANKRD13C	0.00395133	0.00376746	0.00210231	-0.00359971	0.0029133	-0.0056817	0.000202475	-0.00204643
ROBO4	0.00414904	-0.00254128	-0.00472884	-0.00136041	-0.000722887	-0.000214911	4.85534e-07	-0.00362223
FAM49B	0.00603322	0.0154065	0.00548274	-0.0125419	0.0190085	-0.0208009	0.0180679	-0.0131874
GPRC5A	0.00308835	-0.00284612	-0.0026766	0.00191336	0.00121687	-0.00205653	-0.00131201	0.000451887
NENF	0.00353994	-0.0030611	-0.00268677	0.00115053	0.00218064	-0.0021306	-0.000657235	0.000473165
0	0.00354598	-0.00376572	-0.00184695	0.00504444	0.0023646	-0.00314894	1.70391e-05	0.00404014
DNAJC14	0.00393164	2.61404e-05	0.00466463	-0.00433766	-0.00106279	-0.00105067	0.000713612	-0.00193504
BCL2L13	0.00354365	-0.000413262	-0.00105765	-0.000127689	-0.000186324	0.000359783	-0.00106227	-0.00130029
VCL	0.00290986	-0.00156635	-0.0014474	0.0032385	0.00170141	-0.000506864	0.000110045	0.000668327
0	0.00344374	-0.00246877	-0.00288743	0.0024884	0.00213699	-1.32683e-06	-0.000389965	0.000898045
ALCAM	0.00980255	-0.0054768	-0.00897852	-0.0133844	-0.00246458	0.00097817	0.0129877	0.00441074
VAT1L	0.00648274	0.000617504	0.0084436	-0.020173	0.022486	-0.0126546	0.000637985	-0.0156152
LNPEP	0.00883994	0.00807666	-0.00245875	-0.00634573	-0.0103992	-0.00890657	-0.00553608	-0.0054155
RALGAPB	0.00591975	0.00673655	0.00341532	-0.00474006	0.00117004	0.00340806	0.000477428	0.00845226
LOC441124	0.00328018	-0.00296336	0.000126072	-0.00099043	0.00153112	-0.00399438	0.00193775	-0.0010019
CLNK	0.00267994	-0.00273253	-0.00247097	0.00263182	0.00372319	-0.000382522	0.00366765	-0.00108379
DDX5	0.00908142	0.00308799	0.0029839	-0.00854676	-0.00352124	-0.00506003	0.00338191	-0.00731655
FUBP1	0.00675923	-0.000667838	-0.00811865	-0.00878491	-0.0045273	0.000391781	0.00149093	0.00618428
FUBP1	0.00350346	-0.00248919	-0.000358447	0.00150765	0.00198621	-0.000636588	0.00288101	0.000389409
ITGA1	0.00362894	-0.00237956	-0.00328856	-0.000633891	-0.000694718	0.00296835	-0.00373904	-0.00422831
HAND2-AS1	0.00254779	-0.00186294	-0.00191081	0.00197048	0.00209639	-0.00101503	0.00150419	0.000618014
PRPF4B	0.0072595	0.00861147	-0.0095447	-0.00505195	-0.00715484	0.000230114	-0.00561295	0.00805859
ASCC3	0.0044729	2.72435e-05	-0.000144654	-0.00399229	-0.000175312	-0.000667762	-0.00405307	0.00455791
PPP1R14A	0.00754036	-0.00996799	-0.00253668	-0.0320582	-0.0115501	-0.00217693	0.0434607	0.00506249
0	0.00264234	-0.00291938	-0.00114026	0.0014269	0.00390069	-0.00259383	-0.000643904	0.00288975
LOC101060179 /// PRDM11	0.00389356	0.00105924	-0.00413172	0.000972496	0.00156034	-0.00477386	-0.000263451	-0.00185535
ELMSAN1	0.0030331	-0.00251161	-0.000822978	0.00148434	0.00192179	0.00048952	0.000295101	-0.00186663
TNS4	0.00322217	-0.00348272	-0.00125643	0.00102337	0.00491563	-0.00236406	0.00118264	0.00207647
0	0.00278131	-0.00272043	-0.00179168	0.00114424	0.00360508	-0.00138948	0.00241116	0.00148303
LARP7	0.00681434	-0.00557469	0.00327886	-0.0032081	-0.00141506	0.00514927	-0.00338741	0.00597256
OSER1	0.004267	0.000713353	-0.00341446	-0.000851489	-0.00091181	-0.000845196	-0.00280751	0.0038787
CCDC101	0.00390913	0.000117582	-0.00326472	0.00237541	-0.000609052	0.00121488	0.00127301	-0.00223202
UBE3A	0.00592178	0.00610247	0.00117758	5.16764e-05	0.000552807	0.000184878	-0.00115976	0.00875545
GPATCH2	0.0034372	-0.00081579	-0.00304547	-0.00349219	0.00127326	-0.00068906	-0.0020781	-3.63986e-05
DCAF4	0.0039212	0.00217232	-0.00206678	-0.000379744	0.00108894	-0.00047196	0.00137999	-0.000571892
LOC102723990 /// TMEM53	0.00270688	-0.00293096	-0.0017242	0.000295597	0.00339053	0.00233074	0.000516884	0.000124554
DIRC3	0.00317646	-0.00147639	-0.0016853	0.00198553	0.00251397	-0.00156566	0.00127852	0.000310563
PMS2P5 /// PMS2P9	0.00465263	0.00198297	-0.00223364	0.00131042	-0.00115187	0.00102944	0.00242286	0.00161194
PRR14	0.00443793	-0.00208338	-0.00456322	0.000426082	-0.000145481	0.00181528	0.000765675	-0.00296051
UBE2K	0.00823473	0.017782	0.0129384	-0.00012289	0.000416571	0.00228084	0.000379149	-0.0137478
HGS	0.00322235	-0.00197069	-0.000962173	0.00247545	0.00166241	-0.00355474	0.00104269	0.00163998
0	0.00307292	-0.003017	-0.00199397	0.00190465	0.00221621	-0.00361793	-0.00172371	0.00114403
CREB1	0.00538479	-0.0054636	0.0152489	0.00469765	-0.00475747	-0.00389651	-0.00187813	0.0108375
FAS	0.00441534	-0.00403933	-0.000325102	-0.000243571	0.00261765	0.00105863	-0.0101152	0.00202365
PHC3	0.00315465	-0.00240846	-0.000973237	0.00127288	0.00165013	0.000987821	-0.000906202	0.00273713
LOC100505912	0.003392	-0.00587801	-0.000604912	-0.00441731	0.00687048	-0.0030322	0.00360435	-0.00400475
0	0.00271551	-0.000904468	-0.00182243	-0.00174426	0.000930481	-0.000724236	0.000362702	-0.000815638
0	0.00315241	-0.00299955	-0.00343165	0.0051995	-0.000957205	-0.000471483	-0.000481184	0.00449239
IRF2BP2	0.00572158	-0.00769146	0.0034161	-0.0107488	-0.00357725	-0.000592303	0.00235362	-0.00214868
RIC8B	0.00469968	-0.000604505	0.00175587	0.000494674	0.00701986	-0.00543026	-5.86074e-06	-0.0011189
NHLH2	0.00395703	-0.00323117	-0.0041336	-0.00219859	-0.00477659	-0.0062345	0.00129542	0.0045634
PSMF1	0.00377927	-0.00304756	-0.000994916	0.00259776	0.00297637	-0.00233685	-0.000280437	0.00432351
LOC440416	0.00269176	-0.00345518	-0.00101557	0.00166965	0.00291461	-0.00194498	-7.01997e-05	0.00245792
0	0.00336829	-0.00183333	-0.000975729	0.00351485	0.00416	-0.00102464	0.000279598	0.00223606
0	0.00305258	-0.00274393	-0.00300858	0.00343152	0.00247393	-0.00264954	-0.000941037	0.00376253
0	0.00303602	-0.00304955	-0.000756803	0.000864028	0.00340434	-0.0019125	0.00224398	0.00255642
XIST	0.00994373	-0.00492866	0.000271102	-0.00244671	-0.00243501	-0.00266248	-0.00131943	-0.00560183
RBM18	0.00404667	0.00491281	0.0017399	-0.00614708	0.003712	-0.00394635	0.000413398	0.00151894
ROCK1	0.00216931	-0.00141127	0.000515006	0.0010034	0.00277067	0.0015244	0.00168306	-0.00234237
PPP1R3E	0.00419617	0.00142289	0.000775687	-0.00439785	-0.00275413	-0.00154931	0.00373522	0.000527509
CSDE1	0.00921467	0.00384857	-0.00372605	0.00203104	-0.00270043	0.00338671	0.00434283	0.00537097
MOCOS	0.00293098	-0.00267917	-0.00159112	0.00154296	0.00259459	-0.00188911	0.000133967	0.00194266
TRAM1L1	0.00471211	-0.0019495	-0.00109944	-0.00395467	0.00513022	-0.00430891	0.00292152	0.00773158
YIPF5	0.00451455	0.00178407	0.015603	-0.00457505	-0.00294629	-0.00904042	9.02659e-05	-0.000717792
LDLRAP1	0.00405241	-0.00372604	-0.00572149	-0.0026253	-0.00380541	0.000406211	0.00811412	0.00515306
GPX8	0.00288596	-0.00310194	-0.00215924	0.00150527	0.0036364	-0.00113386	0.000367669	0.00126809
0	0.0027078	-0.00298266	-0.00133974	0.000901507	0.00338249	-0.00282603	-0.000707773	0.0019333
RSF1	0.00363511	-0.00134974	0.00285556	-0.00442548	0.00334594	-0.00294938	-0.00296776	-0.00182755
0	0.00271609	-0.00240946	-0.000791218	0.00147144	0.00259256	-1.94263e-05	0.00264883	0.000627897
PRPF40A	0.00317369	-0.00176767	-0.000312133	0.00191548	0.00218058	-0.00357302	0.00105463	0.00347153
NR6A1	0.002955	-0.00163256	0.000600732	0.00157027	0.00102259	-4.3888e-05	0.000848597	-0.00106699
ACY1	0.00237655	-0.00122906	-0.000624538	0.00233087	0.00252496	0.00112295	0.00123442	-0.00184411
TRIM44	0.00754098	0.00697145	-0.0055505	-0.00446021	0.00414658	0.00242647	0.00657903	0.00318109
CLASP1	0.00796639	0.008077	0.0027967	0.00619403	-0.0123546	-4.98832e-05	-0.00543472	8.13774e-05
PROSC	0.00594512	0.00516796	-0.00213198	-0.00366131	-0.000956414	0.00318572	-0.00452645	0.000701094
0	0.00402558	-0.00296926	0.00214068	0.00172574	0.000641891	-0.00271083	0.00124225	-0.00332081
0	0.00276811	-0.00181813	-0.00107447	0.00132033	0.00272004	-0.00126255	0.00252838	2.13657e-05
G3BP1	0.00312764	-0.00367655	0.000662454	0.00286543	0.00353048	-0.000658206	0.000707699	0.00259673
PTGES3L	0.00186847	-0.00178923	0.000794238	0.000286671	0.00451275	-0.00101294	0.000224846	0.000656668
ZNF229	0.00333079	-0.00216417	-0.00243029	0.000587199	0.00423515	-0.000650296	0.000610901	-0.00147409
PARVB	0.00358464	-0.00114372	0.00185726	0.000549747	0.0021966	0.00366887	-0.000517737	-0.00222174
CBX5	0.00858636	-0.00879166	0.0256371	0.0124059	-0.0140144	-0.0097007	-0.00669715	-0.0182115
KIAA0141	0.00366084	0.000415865	-0.0024483	-0.00100591	0.00220711	0.000419968	-0.00107158	-0.000271299
CAMKK2	0.00910854	0.0182532	-0.00320372	0.0103379	0.00223769	0.00292048	0.0105812	-0.00853932
RHOJ	0.00305182	-0.00175247	-0.00213769	-0.000611663	0.000909612	-0.00116824	-0.00435343	-0.00257376
0	0.00272748	-0.00221455	-0.00185776	0.000197992	0.00484967	-0.000945315	0.0014843	-0.00069777
ECSCR	0.00359034	-0.00182774	-0.00159532	0.0001957	0.00223805	0.00136264	-0.00322744	-7.67787e-06
MRPL2	0.00490041	0.00274232	0.00161958	-0.00700963	0.00415148	0.000248621	-0.00126728	-0.00634313
PARVB	0.00256913	-8.73345e-05	-0.00218963	-0.000920598	0.000655382	0.0012735	-0.00228624	-0.00248038
PCGF3	0.00254684	-0.00129089	0.00024653	0.000473298	0.00264504	-0.001336	-8.91507e-05	0.000259178
ZNF496	0.00415553	-0.000389009	0.000413192	0.000800455	-0.000654059	-0.00408357	0.0014973	4.30389e-05
NOL7	0.00474173	-0.000910361	-0.000990185	-0.00583476	-0.0015625	0.00301754	-0.00572756	0.0102999
PRR14L	0.00266423	-0.00296562	0.000110938	0.00232048	0.00020705	-0.00183259	-0.000226301	0.000444555
SYNJ2	0.007878	-0.00368625	-0.00169856	-0.0120934	-0.022378	0.00480225	0.0289446	0.0184213
NPM1	0.00450615	0.000912109	-0.00581508	-0.00261641	0.000299768	-0.00201218	-0.00513531	0.0010245
0	0.00343851	-0.00619158	-0.00127141	0.00102829	0.00242991	-0.00355707	-0.000929156	-0.00147229
CMTM4	0.00975158	-0.00454562	0.0286973	0.00732997	-0.0178966	-0.00666972	-0.00631258	-0.0101338
CCDC71L	0.00423194	0.00135513	-0.000691901	-0.00237437	-0.000921654	0.00175102	-0.00677781	-0.00101136
TRDN	0.00234798	-0.00301023	-0.00159317	0.00129258	0.00473734	-0.000110613	-0.000360967	0.00243828
DIS3L	0.00608094	0.00165563	0.00659562	-0.0118597	-0.00565946	-0.0015148	0.00652091	-0.0042827
FBXL18	0.00522648	0.00983531	-0.00410501	0.00444475	-0.00524641	0.0048943	0.00108281	-0.0120384
0	0.00340389	-0.000164356	1.7496e-05	-0.00271777	-0.00347361	-0.00378743	0.00230286	-0.00903388
PHF20L1	0.00527172	-0.00390838	0.00691409	-0.00236869	-9.44895e-05	-0.00665595	0.00152775	-0.00273593
ESD	0.00330674	0.00154579	0.000477329	-0.00239805	0.00220231	-0.00264529	-0.00205301	-0.000626441
RAPH1	0.0069178	0.0160763	4.12635e-05	0.00139437	-0.0106411	-0.0141416	-0.01618	0.00220865
RAPH1	0.004821	0.0146105	0.00654368	-0.000503764	-0.00184306	-0.00323468	-0.00802002	0.00138264
PAX3	0.00289337	-0.00326451	-0.00238869	0.0029412	0.00162792	-0.00139909	0.000133464	0.00534826
0	0.00359123	-0.00330677	-0.00172684	0.00222577	0.00132948	-0.00135991	0.00120595	0.00259342
PKP4	0.00987675	-0.0114785	-0.00711211	-0.00315696	-0.0126875	-0.00216134	0.0117625	0.0126341
PHF21A	0.00543824	-0.00445985	-0.000971875	0.00292153	0.00280349	0.00469332	0.000274777	0.000891033
MRPS23	0.00390636	0.00321738	-0.00150053	-0.00103822	0.00464197	-0.00290855	-0.000216891	0.00095918
C22orf39	0.00601407	0.00246307	-0.00288121	0.00122847	0.00101334	0.000952868	-0.00148018	0.000792821
DCUN1D4	0.00420976	0.00170114	0.00422936	0.00110049	0.00109137	0.00269561	0.00152148	0.00774278
0	0.00275081	-0.00222732	0.000845319	0.000972383	0.00344065	-0.00102076	-0.00102333	0.0017573
TMEM39A	0.00333737	-0.00438273	0.000933181	-0.00171048	0.00245539	-0.000101501	-0.000608792	0.00146825
TWSG1	0.00505724	-0.00574747	0.00113021	-0.00961195	-0.0026408	-0.00539899	-0.00686453	0.00182775
0	0.0031856	-0.00234764	-0.00205816	0.00130471	0.00255015	-0.00202763	0.00137035	0.000613852
TLDC1	0.00289241	0.00067254	-0.00301082	0.000795863	-0.000152339	-0.00264642	-0.00102692	-0.000378502
LOC100507577 /// LONP2	0.0061458	-0.0024819	0.0194595	-0.00836776	0.00898252	-0.000573477	-0.00233593	-0.00214377
TIFA	0.00291684	6.50215e-05	9.97813e-06	-0.00126346	-0.00107533	-0.00290317	-0.00487197	-0.000121995
TLDC1	0.00296851	-0.00083262	-0.00263452	0.00154886	0.00061006	-0.000211274	0.000327085	-0.00333479
CAST	0.00784524	0.003916	-0.00589291	-0.00756788	-0.0105314	0.00151015	-0.00339223	0.00898956
SMARCE1	0.00310051	-0.00316394	-0.00234671	0.00018478	0.0017101	-0.00118904	0.00107243	0.00162893
PPFIA1	0.00717932	-0.00238727	-0.00586469	-0.0125318	-0.00722723	0.00732751	-0.0134285	0.00696774
0	0.00458295	6.73153e-05	-0.00677326	-0.000809978	0.00311909	-0.00199731	6.28838e-05	-0.00569915
REV1	0.00502373	-0.00360919	0.0070815	0.00110113	0.00485332	-0.00221669	0.00162095	-0.00112723
NR2F2	0.00151706	-0.00138629	-0.000317172	0.000324781	0.00270259	-0.000246793	0.000895623	-0.00105385
C12orf4	0.00586176	0.00871951	-0.00398417	-0.00061366	-0.00424038	-0.00297201	-0.00103607	0.000855609
ZKSCAN1	0.00867863	0.00241483	0.00133599	-0.0111281	-0.00347094	-0.000929473	0.00461761	-0.00148118
FAM120AOS	0.00317219	-0.000923947	-0.000628529	0.00147294	0.0022543	-0.00031359	0.00152257	-0.00162481
IGFL1	0.00271544	-0.000832315	-0.000993847	0.00117782	0.00287441	-0.00116978	0.00019165	0.0007314
NRAP	0.00294081	-0.00154525	-0.000363193	0.00200328	0.00240335	4.34631e-05	4.70079e-06	-0.000148955
NRAP	0.00296516	-0.0016201	-0.000992172	0.00274702	0.00278503	-0.00079762	0.001744	0.000611738
YIPF6	0.00724801	-0.00686618	0.0111682	7.9615e-05	-0.00534605	0.00260751	-0.0011037	-0.00225796
CMYA5	0.00307678	-0.00278156	-0.00126956	0.00342183	0.00278619	-0.00214186	0.00265379	0.000534942
MAPK1	0.00782953	0.0103177	0.0182658	-0.00475772	0.0220912	0.0063699	-0.00181305	0.00266959
TMEM38A	0.00381438	0.00211939	-0.00190335	-0.000547575	0.00563778	0.000435082	0.0050606	-0.00231047
EXT2	0.00367355	0.00187959	-0.00140084	-0.0013655	-0.00191956	0.00355528	-0.00119685	0.00206594
PDLIM5	0.00317243	-0.00072297	-0.00310139	0.00189286	0.000685328	0.000443037	-0.000484037	0.000160978
MAPT	0.00780521	0.00991979	0.00577319	-0.00140298	-0.0011505	0.0112405	0.00852158	-0.0101634
KCTD1	0.00826315	0.0132925	0.00180024	-0.00449671	0.0102042	-0.0134303	-0.0017696	-0.0214006
GANC	0.00366566	-0.00406875	-0.00108872	-8.78525e-05	-0.00021865	-0.00259866	-0.000777098	0.00193888
ZNF585A	0.00543191	-0.00207525	0.00116825	-0.00746311	-0.00905754	-0.012511	-0.00642321	-0.00674286
MOB3C	0.00276472	-0.00286529	0.000642855	0.00144722	0.00254956	0.000768954	0.0017784	-0.00118242
DGCR8 /// MIR1306	0.00352107	-0.000412507	-0.00285067	-0.000161481	0.000287803	0.000663193	0.0018822	-0.000436941
PIGV	0.00492891	-7.05602e-08	-0.00622826	-0.00292156	0.000775429	-0.00172668	-0.0017949	0.00123293
STK17B	0.00248355	-0.00204205	-0.00201765	0.00131071	0.0016607	-0.0017007	5.93298e-05	0.000496771
0	0.00320581	-0.00284038	-0.00311666	0.00207126	0.00364613	-0.00139463	-0.000210754	0.000520078
ORAOV1	0.00347422	-0.00135179	-0.00224922	0.00101985	0.00149944	0.00450079	0.00260517	-0.00167803
HOXB9	0.00253347	-0.00164004	-0.00025656	0.00154913	0.00204161	-0.00145478	0.00178981	0.000778439
STXBP5	0.00567105	0.0122083	0.00970493	0.00500193	-0.0167006	-0.014893	-0.00739825	0.000531406
AP1S2	0.00541492	-0.00524608	-0.00433327	-0.0157047	-0.00948064	0.000851242	0.00183265	0.00392333
TRIM33	0.00804689	0.00569799	-0.00184302	-0.00398397	-0.00492945	-0.00655204	-0.00991194	0.00373112
ZMAT2	0.0088298	0.00874278	0.00460978	-0.00517406	0.0121864	-0.00106603	0.00560694	-0.00554929
TRIM52	0.00443484	0.00213416	-0.00418515	-0.000991216	-0.0016792	-0.00383638	-0.0029903	0.00377014
ZFYVE27	0.00416252	0.0046705	-0.00182109	-0.00235107	-0.000925737	0.00202829	0.00273127	-0.0096292
XRCC5	0.0086086	-0.00252622	0.00885153	-0.00436614	0.00438333	0.0118554	0.000635479	0.00773369
AIF1L	0.00361291	-0.00634522	0.00397276	-0.00125283	0.00214012	0.000271722	0.00887928	-0.00229052
FLVCR1	0.00554772	0.00248021	-0.00221057	-0.00618538	-0.00342048	-0.00943234	-0.00331955	-0.00487059
PRICKLE1	0.00370186	0.00480486	-0.00207411	0.00138073	0.00207133	-0.00406354	0.00067023	9.92602e-06
GSE1	0.00496358	0.00146885	0.00994574	0.00866627	-0.00865916	-0.0051138	-0.00825865	-0.00142309
0	0.00390986	-0.0039843	0.00143193	0.0048321	-0.00380049	-0.00454771	0.000403146	-0.0050402
PPP4R2	0.00620013	-0.00042149	0.00653629	-0.0128904	-0.00991959	-0.000255598	-0.00242006	2.43164e-05
VSTM2L	0.00578562	0.0166877	0.000591589	0.00531034	0.000253119	0.00864666	0.00670823	-0.013158
CLUAP1	0.00485484	0.000745843	-0.00194857	0.000859557	-0.000937018	-0.000825807	-0.00139	0.00159747
BCAS4	0.0044709	-0.00109151	-0.00382777	0.00246645	0.00286216	0.00336724	0.0020528	-0.000889739
TCL6	0.00313103	-0.00206492	-0.000707684	0.00198735	0.00299437	0.000462801	0.000438167	0.00168762
0	0.00458073	-0.0064373	-0.00828565	0.00672805	0.00206143	-0.00081908	0.000643735	0.00750443
ABHD6	0.00652453	0.00301711	-0.00866227	-0.00675638	-0.0132187	-0.00354735	0.0105898	0.00176877
OPA1	0.00421399	0.0074984	-0.00494987	-0.00381631	0.00402356	-0.00432362	-0.00535797	0.0035311
ZNF75D	0.00334092	0.00030591	-0.00271653	-0.000506949	0.0016138	0.000248083	-0.000481229	0.00044565
LPPR2	0.00519712	0.000242596	0.0037666	0.00640681	0.00324855	0.00803516	-0.000564611	-0.00633208
CMBL	0.00608413	0.0023595	-0.0024618	-0.0098944	0.00271359	-0.00730618	-0.00931529	-0.0109548
0	0.00220038	-0.00270929	-0.000838458	0.00171793	0.00345751	-0.000558714	0.00185901	0.00252191
AF131215.3 /// C8orf15	0.0025136	-0.00261116	-7.60841e-05	0.00263097	0.000598722	-0.00278208	0.000441774	-0.00296754
0	0.00335395	-0.00351468	-0.000494399	0.000861808	0.0021365	-0.00137333	0.00150295	-0.000225052
LDB3	0.00524014	-0.00500557	-0.00342176	0.00469588	-0.000547882	-0.0013933	0.00537962	-0.00164785
XIRP2	0.00262888	-0.00181252	-0.00100131	0.00168973	0.00256034	-0.000999705	0.000610503	0.000558867
TOX2	0.00424444	0.0115185	0.000626958	-0.00010539	-0.00288635	-0.00654533	0.001254	-0.00225271
BBIP1 /// LOC100130175	0.00313124	-0.00425069	-0.000809591	0.00291338	0.00108025	-0.00196242	0.00040291	-0.00045379
TMEM161B	0.0038429	-0.00511285	0.00643868	-0.00180069	0.00158059	-0.0055166	0.000612557	-0.00401586
LOC101928710	0.00304074	-0.00308975	-0.000360089	0.00176582	0.0016223	-0.00292962	0.00015204	0.00312262
XKRX	0.0025239	-0.00243309	-0.00197752	0.00231367	0.00277209	-0.00325258	-0.00048296	0.00246089
BRD7	0.00330802	-0.00108536	-0.00221183	-9.89507e-05	0.000658557	-0.00200734	0.000600695	-0.000661266
TNRC6B	0.00413442	-0.000675583	0.0122016	0.00795123	-0.0109425	-0.00883969	-0.00105032	-0.00341525
0	0.00323202	-0.00226661	-0.00137538	0.00075706	0.00301809	-0.00259067	0.000241379	0.00265384
0	0.0027464	-0.0014945	-0.000209338	-0.00133004	-0.00119504	-0.00235775	-0.000559006	-0.00169017
DLGAP1-AS1	0.00305471	-0.00194024	-0.0005692	0.00186092	0.00252646	-0.00176892	0.000148713	0.00091947
0	0.002635	-0.00194644	-0.00115615	0.0025393	0.00275016	-0.000546733	0.00078861	0.000798228
EIF5 /// SNORA28	0.00256508	-0.00249009	4.38109e-05	0.00223256	-9.2541e-05	-0.00236916	0.000601979	-0.00142191
RP11-378A13.1	0.00404393	0.000679882	-0.00212665	0.00250218	0.0034462	-0.0033664	0.00133388	0.0001507
ITGB1	0.00309011	-0.00312991	-0.00191141	0.00364716	-0.000233885	0.00157895	-1.48418e-05	0.00360901
ITGB1	0.00239401	-0.00274407	-0.000520313	0.000202907	0.00154797	-0.000395318	0.000695775	0.000381503
THY1	0.00953667	0.0165725	-0.00799318	0.00349328	0.00351126	-0.0016537	0.00475979	-0.0138521
BUB3	0.00271942	-0.000670349	-0.00253296	0.00113628	0.00281122	-0.000686442	0.00293603	-0.00154412
CLCN5	0.00317238	-0.00353559	0.00135174	0.00300092	0.000519374	-0.00249906	-0.000735307	0.00277835
HPS3	0.00419526	-0.00155556	-0.00190537	-0.0111815	-0.00327187	-0.00349046	-0.0104361	-0.000730168
0	0.00397867	-0.00442957	0.00182147	0.00355895	0.00148743	-0.00119894	0.00246834	0.00023369
LOC100507459	0.00291213	-0.00144363	-0.00129271	0.000793153	-0.000318933	-0.00266085	-0.00188623	0.000488262
TSR2	0.00694916	0.00316628	-0.00413597	0.00420144	-0.00148297	0.00830775	0.0103809	-0.0056055
0	0.00314238	2.59922e-05	0.00347494	0.000200954	0.00162873	-0.00127766	0.00453365	-4.3899e-05
CDO1	0.00338035	-0.00212858	0.000532735	0.000144134	0.00389396	-0.00496017	-0.000774329	0.000332732
ZNF639	0.00369944	-0.000869109	-0.000869085	-0.00705565	0.000970348	-0.0052752	0.000780808	-0.00128008
CHEK1	0.00322067	-0.00303376	-0.00172903	0.00303584	0.00224484	-0.00211881	-0.000903159	0.00505032
ADCY2	0.00350961	-0.00228928	0.0040414	0.00680344	0.00293026	0.00183029	-0.00369587	0.00677103
DAP3	0.0051981	-0.000493628	0.00204595	-0.000137388	0.00137859	-0.00388703	0.00323202	-0.00295545
KRBOX1	0.00348438	-0.00227799	-0.00141269	0.00145192	0.00371722	-0.00182092	3.4254e-05	0.00248835
N4BP1	0.00355886	0.000159966	-0.00385262	0.000355754	-0.00110075	0.000662847	-0.000122445	-0.00182641
PCAT4	0.00280282	-0.00324688	-0.001545	0.00204013	0.00223414	-0.00111565	0.00101797	0.00151877
SPG20OS	0.00419434	-0.00276465	-0.00302504	0.00537164	0.00215362	-0.00134656	0.00156725	0.00532237
LYPD6	0.0030668	0.000985285	-0.00158731	-4.80388e-05	-0.00115459	0.0014088	-0.00319026	-0.00202072
AREL1	0.0022507	-0.00271748	-0.000199523	0.00157456	0.00282792	-0.00176435	0.000663	0.00179649
CEP78	0.00437854	0.000576428	-0.00298929	-0.00935141	-0.00426599	-0.00223984	-0.000655571	-0.00459572
EIF4E3	0.00367986	-1.95058e-05	0.00819404	0.000352079	0.0065818	0.000150992	0.00309471	0.00558302
0	0.00409802	-0.00883014	0.0112522	-0.0055202	-0.00335713	-0.0138928	-0.00495131	-0.00766639
0	0.00353389	-0.00351804	-0.000866274	0.00129904	-0.000117836	-0.00191688	0.000848445	-0.000481859
UGGT1	0.00306883	-0.0022037	-0.000784728	0.00249676	0.00377886	0.00321674	0.000149675	0.000187246
UBASH3B	0.0032952	-0.00409998	-0.000586061	0.00566901	0.00649424	-0.000549076	-8.97222e-05	0.0041202
RNF213	0.00434566	-0.00781405	0.00145139	-0.0100263	-0.00445001	0.000376179	0.00367058	-0.00606075
FAM69B	0.00308205	-0.00065487	0.00103891	0.00142123	0.00412959	0.0031948	0.00438321	-0.0030416
WBP11	0.00339481	0.00324281	-0.000142892	-0.00223019	0.00506918	-0.00465995	4.01305e-05	-0.00126961
PYGO1	0.00302903	-0.0027183	0.00245989	-0.000731286	0.00392133	-0.00228091	-0.000511915	0.00191075
0	0.00252027	-0.00221318	-0.000724453	0.00257634	0.000875208	-0.0021919	0.000627466	-0.000830815
MIR424 /// MIR503HG	0.0030572	-0.000610044	-0.00177509	0.0023236	0.00180378	-0.0019477	0.000863006	0.000223831
DDX19B	0.00309382	-0.00158291	-0.00167557	0.000986001	0.000834201	-0.00313952	-0.000183026	0.001253
EVC2	0.00279371	-0.00255257	-0.000837477	0.00107517	0.0043194	0.00102608	-0.000612542	0.000639392
WDR36	0.00334863	-0.00195327	0.00046177	0.00321293	0.00351632	-0.00098434	0.000392882	0.00149661
0	0.0040516	-0.00183614	-0.00129005	0.00266854	-0.00164981	-0.00116766	0.000867666	-0.00769371
EML6	0.00535818	0.0134306	-0.00240536	-0.00185067	-0.000387072	-0.0043564	-0.00171068	-0.00307394
SHROOM3	0.00295989	-0.00161707	-0.00101291	0.00238885	0.00243176	0.000687228	0.00147689	0.00124259
NEDD1	0.00335506	-0.00404476	-0.000984384	-0.00490349	0.00169229	-0.00290457	-0.00421955	0.00241371
SATB1	0.0028059	-0.00171182	0.00510866	0.00645296	-0.00306153	-0.006788	-0.00173802	-0.00357459
0	0.00570983	-0.00395197	0.00314228	0.0034312	-0.00800725	-0.00435706	-0.00595996	0.00638976
HOXB1	0.00269244	-0.00172238	-0.000933795	0.00268985	0.00343184	-0.00133358	0.0014891	0.00090642
MDGA1	0.00316876	-0.00210024	-0.000424432	0.00219952	0.00112419	-2.59054e-05	0.000973364	4.89047e-05
HIGD2A	0.00366881	-0.000355731	-0.00150453	0.00276508	0.000844545	0.00177816	0.00235508	-0.00396571
FAM49A	0.00806361	0.0176689	0.00630687	0.00451285	0.00345045	0.00133664	-0.00493348	0.00245153
MMP24-AS1	0.00497093	0.000266364	-0.00276102	0.00207338	0.00194215	0.000889424	0.000960752	-0.00280679
0	0.00235323	-0.00112349	0.000711942	0.00202775	0.00211069	-0.00288282	0.000809895	0.00160132
LPXN	0.00318773	-0.00119806	0.00133856	0.000808958	0.000970651	-0.000501493	0.00322101	-0.00209926
0	0.00282372	-0.00247243	-0.0017097	0.00214456	0.00421819	-0.000254769	0.00161028	0.00281736
ENTHD2	0.00418671	-0.00290737	-0.00282302	0.00456542	0.0012158	0.00379248	0.00352006	0.0021807
UBA6	0.00339702	-0.00185158	-0.0015483	0.00200156	0.000690167	-0.00337837	0.00250877	0.00169987
GNAS	0.00239312	-0.00189034	-0.00107994	0.002083	0.00219469	-0.00185488	0.000522502	0.00137632
METTL15	0.00485082	0.00119109	-0.00359702	7.41491e-05	-0.00131621	-0.00432619	-0.0022575	-0.00243901
KANSL1L	0.00376351	-0.00165044	-0.00164509	-0.00140644	-0.00168932	-0.003788	-0.00404116	0.000750943
DIP2B	0.00347883	-0.00527602	0.00235449	0.00320221	5.16361e-05	-0.00497277	0.00397134	0.000373843
ANKIB1	0.00565475	-0.00464236	0.00765584	-0.0157811	-0.0087706	0.0021354	0.00631157	-0.00414414
0	0.00354117	-0.00195757	-0.000712089	0.00186548	0.00210162	-0.0007961	0.000567054	0.0028308
MIR17 /// MIR17HG /// MIR18A /// MIR19A /// MIR19B1 /// MIR20A /// MIR92A1	0.00269827	-0.00301125	-0.00191961	0.00182052	0.00369073	-0.000585981	0.00121413	0.00297097
0	0.00229818	-0.00339921	-0.00105611	0.00225928	0.00277147	-0.00254948	0.000917755	0.00435183
TMED5	0.00284961	-0.00303064	0.000664523	-0.000744965	0.00198154	-0.00166181	0.000322262	-0.000700099
0	0.00262907	-0.00239607	0.0010125	0.0021759	0.00202746	-0.00270128	-0.000245206	0.000139469
RBM33	0.00260001	-0.00290402	0.00125938	0.00230192	0.00283173	-0.000972476	-0.000295786	0.00440765
0	0.00245037	-0.0026454	0.00361509	-0.00134582	0.00162973	-0.00149375	0.00249139	-0.00168386
INTS6	0.00270762	-0.00121845	0.000516262	-0.00124408	0.00290496	-0.00337026	-0.00118776	0.00226374
LOC101928767	0.0029287	-0.00331559	-0.00173157	0.00354236	0.00186788	-0.000288129	0.00139366	0.00222862
LRRFIP1	0.00349283	0.00127993	0.0046899	0.00555342	-0.00986902	-0.00448857	-0.00636305	-0.00474511
CLEC2D	0.00303709	-0.00220423	-0.00224894	0.00226874	0.0011748	0.00067366	0.00074298	0.00133321
0	0.00259713	-0.00247896	-0.000979896	0.00207893	0.00439107	-3.58952e-05	0.00400082	-0.000269947
LOC286052	0.00403227	0.00476157	-0.000443561	-0.00577083	-0.00262911	-0.00497449	-0.00264555	-0.000472697
0	0.00367829	-0.000765012	-0.00100922	0.00442947	-0.00253456	-0.0020131	-0.000983974	-4.61953e-05
DLG1	0.00302084	-0.00254919	0.000607279	0.00226298	0.00292473	-0.00216019	-0.000354774	0.00376316
PRKRA	0.00330121	-0.00398977	0.00574499	0.00131316	-0.00390847	-0.00977871	-0.000711748	-0.00345628
ZNF638 /// ZNF638-IT1	0.0051018	-0.00361652	0.0130225	-0.00855747	-0.0166952	-0.00927455	-0.00470301	-0.0121027
0	0.00445213	-0.00310858	0.00105738	0.00350783	0.000547056	-0.00322445	-0.00085731	-0.000614321
AJ420595 /// GOPC	0.00282282	-0.00352246	0.00375974	0.00357042	-0.00156379	-0.00410041	0.00060223	-0.0019625
ZBED6	0.00270518	-0.00345522	-0.000811327	0.00226232	0.00111477	-0.00239095	-0.00144697	0.00173553
CNTLN	0.00273462	-0.00268053	-0.00109197	0.00210903	0.00256486	-0.00191144	0.0011461	0.00115569
RPL12	0.010274	-0.00410149	-0.0102295	-0.00446997	-0.00319804	0.0158264	-0.00172708	-0.00539281
0	0.00263688	-0.00233128	0.000237873	0.00258387	0.00166614	-0.00493121	2.90617e-05	0.00462035
0	0.0033823	-0.0013873	0.000593737	0.00234389	0.00170198	0.000787022	0.00304898	0.000228187
GPR82	0.002583	-0.00292212	-0.00136921	0.00147113	0.00329207	-0.00228007	0.00163113	0.00196155
MTMR9LP	0.00257969	-0.00120847	-0.00110924	0.00101195	0.00230688	-0.000936588	0.00113109	0.000350289
0	0.00282021	-0.00225637	-0.000757653	0.00226922	0.00342311	0.000297669	0.00174361	0.000730053
ZNF100	0.00349757	-0.00259748	-0.00325089	0.000464836	0.00262835	-0.00431475	0.00124012	0.00261346
CDH26	0.0041197	-0.00278706	-0.000650522	0.00264863	0.00379608	-0.00120427	0.0022487	0.00220052
MAP6D1	0.00311228	0.000660844	-0.00246657	-6.16838e-05	-8.13853e-06	-0.00374752	0.00152124	-0.00104508
0	0.00294119	-0.00419832	0.000751475	-0.000364482	0.00116906	-0.00487533	-0.000641648	0.00207836
TIRAP	0.00302162	-0.00337574	-0.00219518	0.00349318	0.00428843	-0.00100176	0.00132979	0.00494489
KLC1	0.00978226	0.0226096	0.00827939	0.00612558	0.00163504	0.0112829	0.00962161	0.00890482
KLC1	0.0107311	0.0159431	0.0165589	0.00402531	0.00272336	0.0166949	0.015528	0.00543008
0	0.0021731	-0.000502687	-0.000595006	-0.000190348	0.00161576	-0.00153017	0.00071911	-0.00178233
MGEA5	0.00273781	-0.00336689	0.00198237	4.21058e-05	0.0046246	-0.00329395	0.00105071	0.00460251
NUDT17	0.00360038	-0.00119631	-0.00141196	0.000596811	0.000582796	-0.000908367	-0.000423094	-0.00194167
GLIPR2	0.0041977	-0.00443738	0.00485344	-0.00331836	-0.00370399	0.00487551	0.00127517	-0.000547427
0	0.00291105	-0.00240264	-0.000831264	0.000530331	0.00484351	-0.000113855	0.00134303	0.000360545
ICAM1	0.0055733	-0.00414137	-0.00430469	0.00705528	0.000211096	-0.00188278	0.00281227	-0.00466418
CAMK2G	0.00452165	0.00840173	0.000520178	0.00323454	-0.006562	-0.00339219	0.00564795	-0.000572069
ZNF79	0.0030847	-0.001096	-0.002106	0.00147157	0.000151504	-0.00147934	0.00148468	-0.00238812
TCRA /// TRAV21 /// TRAV21 /// YME1L1	0.00277135	-0.00208924	-0.00171503	0.00284656	0.000183887	-0.00171166	0.000720979	0.000260409
GIMAP1	0.00311523	-0.00257089	-0.000775191	0.000595247	0.00305835	-0.00226867	-0.00110724	0.00250485
SP100	0.00255882	-0.00334517	-0.000704498	0.00126304	0.00371685	-0.00136879	0.00168153	0.00078237
RAD18	0.00249128	-0.00167101	-0.000876926	0.00167893	0.00328748	-0.000561051	0.00319435	0.000613722
C12orf73	0.00488028	0.00294437	0.00506858	-0.0049717	0.00771338	0.00289958	0.00107521	0.00108385
0	0.00236689	-0.00175568	-0.000706731	0.00154252	0.00301014	-0.00179699	0.000783702	0.00246939
LOC646214	0.00352947	-0.00326356	-0.0012475	-0.00467467	-0.00177463	-0.0080329	-0.00435654	0.00206761
0	0.00234353	-0.00101553	-0.0018469	0.000732531	0.00270683	-0.00161012	0.000647768	0.000958315
SORL1	0.00418786	-0.00218622	0.00781185	0.00360057	-0.00945807	-0.00459202	0.00188887	-0.00220367
USP32 /// USP6	0.00329168	-0.00150032	-0.00124503	0.00234982	0.00153985	-0.00135122	0.00100073	0.000931864
NOTCH2	0.00740825	-0.00446288	-0.00732384	-0.000676057	-0.0121537	0.00759825	-0.0189285	-0.00179086
H3F3A	0.00367498	-0.00461925	0.00181008	0.00144941	-0.00185976	0.000561536	-0.00172522	0.00309973
COL6A1	0.00773831	0.00528287	-0.0125809	0.00788062	-0.0129665	0.00534411	-0.00490878	-0.0124753
0	0.00374521	-0.00285863	-0.000570693	0.00259005	0.00223587	-0.000173022	0.000312036	0.000299318
KIF18B	0.00281988	-0.00222617	-0.00287449	0.00269307	0.000741145	-0.00248592	-0.000569975	0.00204537
GK3P	0.00296232	-0.00107134	0.000115465	0.00224128	0.00312914	-2.19051e-05	0.00068356	-0.00106119
DCST2	0.00260546	-0.000722555	-0.00181037	0.00204918	0.00266031	-0.00197195	0.00103102	0.000271129
CHMP1B	0.00437682	0.000655952	0.00275538	0.00130106	0.00537277	-0.00109593	0.00126779	0.000881747
NRP2	0.00301182	-0.00368062	-9.1474e-05	0.00281149	0.00243578	0.000247084	0.000453557	-0.00316258
FGD4	0.0033262	-0.00421005	0.00345757	0.00358146	0.00328396	-0.00235809	-0.00160131	0.00506305
ERG	0.00352433	-0.00319814	-0.000185792	0.00227707	0.00344751	0.0011699	0.00150386	-0.00303104
0	0.00311136	-0.00299908	2.54086e-06	0.00406632	0.00283294	-0.00133641	0.00167465	0.0027963
SLA2	0.00309937	-0.00204696	-0.0012506	0.00224196	0.000914185	-0.00398954	-0.000213	0.00136719
MYPOP	0.00423033	0.00706506	-0.00134311	0.00136757	-0.00211952	0.00239671	0.00325853	-0.00756896
LOC399491	0.01117	0.00109863	-0.00329711	0.00694136	-0.0109524	0.00905861	0.00155544	-0.0148527
CD1E	0.00241578	-0.00137356	-0.00198856	0.00301844	0.000587357	-0.00329799	0.00174479	0.000256167
AK291611 /// TRGV7 /// TRGV7	0.0037167	-0.00150373	-0.00183873	0.00412273	0.000743489	-0.00284219	-0.000423798	0.000862702
MED16	0.00587118	0.00709469	-0.0180439	-0.00196037	-0.00382358	0.00977228	-0.00204392	-0.0103852
CCDC64	0.00397589	-0.00139298	-0.000507663	0.00393199	0.00157588	-0.00109418	0.00261363	-0.000488274
RPS10	0.0140118	-0.00247565	-0.00970532	0.00117409	-0.00159504	0.00323506	-0.00159644	-0.00188776
0	0.00309011	-0.00339797	-0.00234466	0.00457677	0.00301197	-0.0017415	0.00160085	0.00411861
PPM1L	0.00247801	-0.00173371	-0.000827137	0.00142752	0.00272272	-6.73733e-05	0.00121725	-0.000232775
PLXDC2	0.00298323	-0.00319872	0.0013961	-0.00365734	0.00104888	-0.00142822	-0.00135266	0.000999365
CA8	0.00342552	-0.00351044	0.000200031	-0.000959022	0.00578912	0.000713831	-0.00210633	-0.00354089
ZNF536	0.0060518	-0.00101608	0.000736186	-0.018261	-0.0130754	-0.0121373	0.0212323	0.00593667
VTI1A	0.00293722	-0.002791	2.61321e-05	0.00262658	0.00388226	-0.00252373	0.00130336	0.00302452
TEAD2	0.00336383	-0.00201276	-0.00198599	0.0027123	0.0030253	0.00206505	0.00207777	-0.000273701
TEAD2	0.00237061	-0.00158373	-0.000170802	0.00093329	0.00448141	0.000615466	0.00111089	-0.00202578
MTSS1L	0.003227	-0.00241123	-0.00075283	0.00403942	0.000190614	-0.00230287	0.000212568	-0.00425942
SEMA3D	0.00296305	-0.00220706	-0.00156376	0.00263255	0.000593467	-0.000246595	0.00197572	-6.02722e-05
RP11-488L18.10	0.00414187	-0.000632657	-0.000119662	-0.00350969	0.000534795	-0.00472371	-0.00382945	-0.000153918
0	0.00266025	-0.000700913	-0.000380411	-8.54162e-05	6.78058e-05	-0.00276965	-0.000232913	-4.15763e-05
NRDE2	0.00337161	-0.00266576	-0.00114443	0.00334713	0.00265831	0.00327547	0.00286785	-0.00131
KIAA1919	0.00238036	-0.00160773	-0.00026639	0.00165534	0.00233894	-0.00270555	-5.24535e-05	0.00287483
0	0.00292738	-0.00233127	-0.00118231	0.00263897	0.00231945	-0.00227386	-2.46984e-05	0.00322756
ITPKB	0.00404718	-0.0102139	0.00923509	0.000379565	-0.00862138	-0.00534415	-0.00327089	-0.00918638
0	0.00527652	-0.00314038	-0.00105493	0.00541806	0.00363358	0.00066734	0.00223845	0.000679403
DENND5A	0.010092	-0.0059791	-0.00332013	-0.003241	-0.00783763	0.00620309	0.00606308	0.00414799
ZNF544	0.0044873	0.00298353	-0.00443836	0.00263025	0.00135475	-0.000966095	-0.000540005	-0.0030077
ASB12	0.00433323	-0.00386585	-0.00410814	0.00356454	0.00327517	-0.00279402	0.000141572	0.00182951
JMJD6	0.00394021	0.0017638	-0.00745913	0.00216665	-0.00504439	-0.00515474	0.00246696	-0.0034143
ST8SIA4	0.00281442	-0.00294201	-0.000524492	0.00124618	0.00365311	-0.00163884	-0.00125515	0.00132138
METTL14	0.00418369	-0.000377721	0.00189843	-0.00830057	0.00161016	-0.00752283	-0.00133986	-0.00104867
0	0.00328808	-0.0016484	0.00148735	0.00162424	0.00294776	-0.00229782	0.00114883	0.00255787
INPP4A	0.00570437	0.0180974	0.0125225	-0.000160637	0.0145608	0.00352212	0.000647569	0.00366731
0	0.00353116	-0.00364521	0.00274547	0.00361237	0.00320717	0.000761554	0.00167898	0.00549804
PATL1	0.00407738	-0.00323355	0.00394259	0.00401	0.00365767	0.000241244	0.000713776	0.00349258
PATL1	0.0034354	-0.00235077	0.00147243	0.00274559	0.00336423	0.00217029	0.00197731	0.00111696
MAP3K1	0.00405136	-0.00457336	-0.000622907	0.00554574	0.00096799	-0.000290133	0.0025417	-0.00185256
0	0.00353996	-0.00201488	-0.00195756	0.00334188	0.00308053	-0.0028518	-0.000128036	0.00126407
FAM124A	0.00310269	-0.00328285	-0.00111294	0.00083917	0.00365438	-0.002359	0.00289312	0.0024848
MCM8	0.00430105	-0.00287337	-0.00191592	0.00537435	0.00366591	-0.000314851	0.00171389	0.00319796
TMEM41A	0.00349736	-0.000263168	-0.000465419	-0.00166713	0.000431766	-0.00234077	0.00137755	-0.00255095
NCOR2	0.00313503	-0.00308676	0.000297416	0.00203094	0.00370086	-4.79056e-05	0.00201568	-0.000763547
FAM171B	0.0030874	-0.00286579	0.00620899	0.00576058	0.000558354	-0.00804063	-0.00203725	0.000358702
SLC25A37	0.00297208	-0.00246283	-0.000664447	0.000140498	-0.00108887	0.000110718	-0.00195386	0.000251555
0	0.00317158	-0.00247748	-0.000861269	0.00349426	0.00205446	-0.00208395	0.00122524	0.000157005
UBXN10	0.00354445	-0.000714925	-0.00296619	0.00367896	0.000971737	-0.00271955	0.000824767	0.00200426
COX7C	0.00555839	0.0045458	-0.00268467	-0.0126464	0.00753193	0.00528387	-0.0015791	-0.00113423
MARCH11	0.00380772	0.0038029	-0.00342666	0.00337801	0.000522145	-0.00394589	-0.000984162	0.00133572
PLCB1	0.00358387	-0.000742662	0.00386588	0.00852946	0.00595055	-0.00385457	0.00323724	0.00611242
0	0.00827491	-0.00593903	0.00735996	0.0142497	-0.00552454	-0.00431608	0.000115393	0.000902685
BAG1	0.00298624	-0.00209203	-0.000746549	-0.00016335	0.00289672	-0.0030599	-0.00068997	0.000411671
BANF2	0.00367533	-0.0049729	0.00055551	0.00325905	0.00511689	-0.00303124	0.000703972	0.00470904
OARD1	0.00457766	0.000547075	0.000792877	-0.00158169	-0.000468132	-0.00372134	0.00115673	-0.00345
NPEPL1	0.00580808	-0.00379708	-0.0049691	0.00582188	-0.00188344	0.00335387	0.00373044	-0.00764098
RP11-664D1.1	0.00299927	-0.00156048	-0.00216772	0.00230548	0.00184006	-0.001282	0.000219974	0.0014707
SREK1IP1	0.00339917	-0.00220317	0.00733371	0.000157693	0.0030568	-0.00343447	0.00115003	0.00148617
CTB-174D11.1	0.00196231	-0.00146448	-7.92206e-05	0.00149332	0.00213026	-0.000836967	-0.000275041	0.000514966
ZNF830	0.00543466	0.00251259	-0.00150818	-0.00533992	-0.000731193	-0.00192143	0.00308934	-0.00236975
AX746627	0.0040841	0.00780183	-0.00345527	-0.000415145	0.00581447	-0.00316853	0.000964419	-0.000391792
GUSBP11	0.00532095	-0.000727142	-0.00214993	0.00256974	-0.00894832	0.00701294	0.00236274	-0.0052096
SPACA3	0.00250893	-0.00108629	-0.00108057	0.000891282	0.00270573	0.00058387	0.00281468	-0.000738082
PACRGL	0.00332878	-0.000252637	-0.00324441	-0.00410403	0.000798514	-0.00338551	0.00238182	-0.00178593
PACRGL	0.00324151	-0.000266171	0.00467507	-0.00177901	0.0026129	0.000615076	0.000468311	0.00243928
C11orf94	0.0030982	-0.00129851	-0.00110618	0.00239112	0.00160452	-0.00121665	0.00118677	0.000864028
C15orf65	0.00373739	-0.00115213	-0.00136492	-0.000565579	0.00341619	-0.00303754	-0.00185845	0.00111159
0	0.00388689	-0.00105315	-0.00217142	0.00207874	-0.000786051	-0.00507597	-0.00180396	0.00094121
RP11-498C9.15	0.00387083	0.000824795	-0.00376493	-0.00295642	0.00439405	-0.002991	0.000186588	-8.97076e-05
VPS13A-AS1	0.00313094	-0.000765809	-0.00101317	0.00134542	0.00406076	-0.00160171	0.00177224	-0.000733072
LOC100507291	0.00353895	-0.00287236	-0.00212788	0.000887251	0.0020211	0.00111407	0.00014925	0.000501145
WBSCR28	0.00253469	-0.0016521	-0.00196779	0.00109491	0.00468561	0.000628724	0.00220617	-0.000293925
MROH2B	0.0026321	-0.00201147	-0.00142906	0.00134609	0.00293674	-0.00103282	-0.000397755	0.00440378
MROH2B	0.00286441	-0.00341328	-0.000877047	0.00184351	0.0032715	-0.00182392	0.00221686	-0.000375591
0	0.00277326	-0.00260118	-0.000606053	0.00167378	0.00167521	-0.00110852	0.000897938	0.00205373
TOM1L2	0.00449499	-0.00277794	0.00199809	0.005584	0.00361714	-0.000137015	0.00167504	0.000698965
PRSS30P	0.00262557	-0.0018391	-0.000752858	0.00155096	0.00417724	0.000251757	0.00136403	-0.000272344
AKAP14	0.00257826	-0.00176518	-0.00142262	0.00205646	0.00353282	-0.00035781	0.000958509	0.00313527
FAM65A	0.00538818	0.00258481	-0.0046613	0.00126202	0.0017354	0.00257278	-0.00177854	-0.0069136
AMACR	0.00282213	-0.00229942	-0.001444	0.00169099	0.00444805	-0.000441952	7.60607e-05	0.00250702
PPP1R36	0.00343873	-0.00295735	-0.00249549	0.000518606	0.00126036	-0.00320621	0.00159873	-0.000362955
TWISTNB	0.00301836	-0.00301634	-0.00236097	0.0044268	0.000810716	-0.00216206	-0.000303814	0.00215775
GUCA1A	0.00314057	-0.00114805	-0.00119301	0.00242095	-6.60583e-05	0.00124646	0.00150431	-0.00136177
LINC01360	0.00350592	-0.00270377	-0.00242229	0.00369542	0.00441739	-0.00172343	0.00175438	0.00177841
SPATS1	0.00262286	-0.00248401	-0.000526747	0.00151251	0.00349599	-0.00312939	0.000580844	0.00136895
CCDC155	0.00315195	-0.00313601	-0.000654146	0.00310467	0.00170232	-0.000275083	0.00109843	0.000324102
MTPAP	0.00248334	-0.00167835	0.00674912	0.00218626	0.00279771	-0.00247642	0.00192765	0.0031053
0	0.00276342	-0.00183603	0.00215792	-0.002076	0.00811292	-0.000758971	0.00016709	-0.00426985
SGCD	0.00371635	-0.00295067	0.00207046	-0.00151489	-0.00185138	-0.00478821	-0.00203372	0.00264936
0	0.00403891	-0.00184069	0.0055976	0.00564394	-0.00357587	-0.00413118	-0.00146975	-0.00182958
DYNLL2	0.00302072	-0.00123407	-0.000435289	5.84649e-05	0.0020327	-0.000799765	0.00124182	7.53188e-05
TMEM234	0.00380384	-0.00330335	-0.00224484	0.00189535	0.00305977	-0.0011268	0.00169757	7.24357e-05
GNAS	0.00739674	0.0203805	-0.00762185	0.00595499	-0.00728874	-0.00476757	0.00707055	0.00261967
TMEM231	0.00446254	-0.000643314	-0.00133778	-0.00663196	0.0059386	-0.00336405	-0.00368611	0.00299545
NDUFV2-AS1	0.00329946	-0.00197352	-0.00228551	0.00320624	0.00138642	-0.00137295	0.00089382	0.00179875
0	0.00287495	-0.000977	-0.00202963	0.00328723	0.000757395	-0.000199495	-0.000489626	0.000557158
0	0.00441901	-0.00130051	-0.00345119	0.00627661	-0.00223065	-0.00408603	-0.00061531	-0.00289002
C7orf25 /// PSMA2	0.00366694	0.000880399	-0.00421098	-0.0005632	0.00112724	-0.00338966	-0.00099833	0.00343721
0	0.00272374	-0.00301661	-0.00201974	0.00189944	0.00182174	-0.00247387	-5.37918e-06	0.00318692
0	0.00364187	-0.00179477	-0.00144198	0.00194013	0.000649685	0.00264418	0.0025587	-0.000455006
TDRD6	0.00409685	-0.00164725	-0.00182904	-0.00306055	0.000891647	-0.000891979	0.00313516	-0.000243386
0	0.00375487	-0.000632587	-0.00201779	-0.00126623	0.00200096	-0.00525372	-0.00226219	-0.00246891
PRICKLE1	0.00580015	0.0185592	-0.00145607	0.000978695	-0.000687999	-0.00249992	0.000264675	0.000661083
RARA-AS1	0.00327153	-0.000605602	-0.00080581	0.000802662	0.00062761	0.000499993	-0.00100748	-0.000666383
IGLON5	0.00374806	0.000907887	0.000655895	0.00340883	-0.000526883	0.000801456	0.00272809	-0.00271005
LOC100131053	0.00393029	-0.00152299	-0.00346326	0.00179561	0.00213896	0.00147232	0.00180936	0.000804717
ABHD13	0.00346917	0.0026904	-0.000469729	-0.00343556	0.000730969	-0.00548007	-0.00326848	-0.000763185
0	0.00323438	-0.00208365	-0.00236533	0.00068898	0.00139347	-0.00279066	0.00344312	-0.00374471
MKNK2	0.00718808	-0.00616668	0.00193576	0.00147141	-0.00274242	0.00398675	-0.0028164	-0.00986621
0	0.00393095	-0.00302141	0.00549039	0.0029261	-0.00381144	-0.00652289	-0.00212934	-0.00288166
ARHGAP36	0.00270886	-0.00267954	0.00103455	-0.00414709	0.00835726	-0.00109481	-0.0037438	9.45074e-05
UHRF1BP1L	0.00344842	-0.00309754	-0.00197667	0.00449523	0.00131707	-0.00288912	0.000884208	0.00132862
HAGLR	0.0029095	-0.0027671	-0.00163458	0.00304249	0.000478965	-0.0043041	-0.000321018	0.00346228
0	0.00329938	-0.00267317	-0.0003256	0.00267809	0.00285337	-0.00105992	-0.000484491	0.000799282
0	0.00213211	-0.00274928	-0.00183992	0.00100286	0.00360986	-0.00200387	0.00120315	0.00133299
TMEM200C	0.00300331	-0.00152562	-0.00109522	0.00213074	0.00378671	0.00101315	0.00127882	-0.00101183
LOC441204	0.00340763	-0.00114239	-0.00167649	0.00379188	0.00146922	-9.6551e-05	0.00283948	0.000648331
TTC39C	0.00313334	-0.000553671	-0.00206312	0.00132627	0.00185045	0.00203653	-0.000384981	-0.000809215
0	0.00281737	-0.00233866	-0.00231321	0.00331707	0.00181529	-0.00101617	0.00138346	0.00272527
GPSM2	0.00482924	-0.00744674	0.00466117	-0.00731051	-0.0158147	-0.0043348	0.0118174	-0.00419034
GPX7	0.00298197	-0.0013151	-0.000540556	0.000372299	0.00226737	-0.00106894	-0.00103666	-0.000395328
FAM91A1	0.00258222	-0.00207264	-0.000636431	0.00136622	0.00334825	-0.000618988	-0.000555624	0.00172133
0	0.00322362	-0.00403357	-0.000486023	0.00204394	0.00303013	-0.00408299	-0.000941678	0.00399277
CLNS1A	0.00415043	-0.00214445	-0.000207215	0.00401381	-0.00509042	-0.00626919	-0.0022681	-0.00189098
LINC00293	0.00226389	-0.00210881	-0.000481194	0.00112889	0.0025464	-0.000139706	0.000228632	0.00206409
0	0.00268043	-0.00153904	-0.00123944	0.000411003	0.00241723	-0.00196465	0.000822987	0.00156117
CD300LG	0.00274362	-0.00258162	-0.00210689	0.00200855	0.00150467	-0.00181124	0.00220185	0.000423774
LOC101927081	0.0029248	-0.00273018	-0.00126733	0.00177231	0.00405441	-0.000877161	0.00191555	-0.000138161
MIR6883 /// PER1	0.0024358	-0.00398613	0.00420559	0.00200525	-0.00306688	-0.00399622	-0.00330772	-0.00526238
WDR74	0.00406481	-0.00202083	-0.00162045	0.0031402	0.00376386	-0.00165966	0.000923486	-0.00121591
RP11-138A9.1	0.00535687	0.00221185	0.0101326	0.00486343	-0.0194048	-0.00862095	-0.00482853	-0.0188332
0	0.00263911	-0.00352471	-0.00096781	0.00139117	0.00307911	-0.00137883	0.00172262	-0.00117169
LINC00883	0.00377503	-0.00276466	0.00380999	0.00137282	-0.000460094	-0.00485503	0.00225769	-0.000293533
LOC101927093	0.00259257	-0.00257432	-0.000989071	0.0017824	0.00437667	-0.00236284	0.00107136	0.00453813
SMG7-AS1	0.00376799	-0.00285593	-0.00125004	0.00504013	0.00237026	-0.00201271	0.00213495	0.000295789
RIT1	0.00373574	-0.00394974	0.00238745	-0.00702756	0.00306992	-0.00518616	-0.000547483	-0.00177177
0	0.00328236	-0.00344614	-0.00036221	0.00243237	0.0029298	0.000506408	0.00170909	9.02746e-05
ZNF621	0.00296088	-0.0024104	0.000996885	-0.000693994	0.00163789	-0.00356111	0.00172056	-0.000762619
WWC2-AS2	0.00289482	-0.00170678	-0.000420987	0.00144964	0.00400838	0.00103664	0.00122889	-0.00100704
LINC00968	0.00282475	-0.00282405	-0.00109918	0.00159835	0.00418551	-0.00146755	0.003541	0.000905471
CFLAR	0.00389817	-0.00667249	0.00404858	-0.0118451	0.00355368	-0.00363968	-0.00406559	-0.00388987
LOC100499489	0.00262679	-0.00117384	-0.000745427	0.00209898	0.00233763	0.00231766	0.00325945	-0.00205391
LINC01137	0.00325587	-0.00289419	-0.00243563	0.00146877	0.00166958	-1.84789e-05	0.00226742	-0.00245669
TMTC3	0.00535353	0.00773842	-0.00393337	-0.0105326	-0.00324143	-0.0088915	-0.00766036	-0.00880122
C20orf26	0.0025328	-0.00166144	-0.00049822	0.00128413	0.00305595	-0.00189712	0.000271421	0.00163878
CTSZ	0.00321124	-0.00271082	-0.00149179	0.00404003	0.00082612	-0.000356248	0.000870548	-0.0018784
MRAP2	0.00606858	0.013627	-0.00250986	-0.000117157	0.00272793	-0.0013332	0.00508871	0.000791725
0	0.00306431	-0.00197766	-0.0005762	0.00289195	0.0034529	-0.00359793	-0.00101371	0.00223846
MYL6	0.00530792	-0.00519984	-0.00253236	0.00624568	0.000671853	0.000829445	0.00134307	-0.00250113
NFIA	0.00719691	-0.0082226	0.00956932	-0.00260355	-0.0121217	0.00296967	-0.00908018	-0.0129861
ZNF813	0.00293625	-0.00205571	-0.00298325	0.000615542	0.000887167	0.00114197	0.00185787	-0.00127855
C15orf61	0.00766406	0.0136951	-0.00181408	-0.0091403	0.00796815	-0.00983151	0.00110791	-0.0112366
BREA2	0.00286872	-0.00174351	0.000150201	0.00205664	0.00222537	0.000210222	0.000483024	0.000968884
0	0.00348281	-0.00334496	-0.00104423	0.00217233	0.00335981	0.000345834	0.000629128	0.00406012
GGN	0.00234156	-0.000730129	-8.00846e-05	0.000624272	0.00326426	-0.000622025	0.00136018	-0.00177114
MED8	0.00349006	0.000321243	0.000886617	0.00114251	0.000684742	0.00296371	0.001904	0.00198527
WIZ	0.00476049	0.00214652	-0.00224666	0.00330891	-0.00433365	0.00655844	-0.00414832	-0.00593913
VTA1	0.00324619	-0.0001181	-0.00172476	0.00368892	-0.00243872	-0.00302985	0.00033614	0.000878062
LYRM7	0.00781552	0.00242862	0.0124048	0.000458302	-0.0105891	-0.0122982	0.00354999	-0.00486702
0	0.00300712	-0.0022587	-0.00204664	0.0020641	0.00334671	-0.00016534	0.0010527	0.000484843
LINC00427	0.00271449	-0.00189922	-0.00125971	0.00157969	0.00279885	-0.00159078	0.000685917	0.00207894
FAM208B	0.00304485	-0.00304404	0.00172206	0.00236289	0.00406603	-0.000226484	0.000749096	0.00362143
PRRX1	0.00275015	-0.00223616	-0.000548407	-0.00272192	0.00144587	-0.00231673	-0.00291383	0.000893028
LOC101927703	0.00378836	-0.00295796	-0.00166894	0.00322811	0.0013402	-4.15783e-05	0.00222035	0.00325306
0	0.00509312	-0.00536863	-0.00372627	0.00389102	0.00353811	0.000242599	0.00377203	0.00137007
THNSL2	0.00307607	-0.0026065	-0.00158501	0.000615403	0.00272257	-0.00300761	-0.00173017	0.00373585
COMMD6	0.00259573	-0.000936096	-0.000297061	0.000250037	0.00228503	-0.00216437	-0.00105406	0.00151313
YPEL1	0.0047432	-0.00158042	0.0164886	-0.0148118	0.026862	-0.00235903	-0.00508995	-0.0158948
SIPA1L3	0.00509705	0.00177476	-0.00382957	0.00385265	-0.00732456	-0.00321908	0.000359564	0.00353514
JMJD1C	0.00613876	-0.00686226	0.0204232	0.00836662	-0.0109752	-0.0125116	-0.0015716	-0.0101728
ITPRIP	0.00368378	-0.00423058	-0.00203804	-0.000404299	0.000438821	0.0002368	-0.00269491	-0.0018731
0	0.00303821	-0.00242762	-0.00157183	0.00165503	0.00332593	-0.000548463	0.000198858	0.00179779
0	0.00409287	-0.00288703	-0.00215559	0.0033918	0.00420199	-7.40478e-06	0.000957205	-4.06225e-07
CATSPERG	0.00232631	-0.00178929	-0.00141313	0.00201735	0.00345878	-0.000614802	-8.46694e-05	0.00221615
PTP4A3	0.00396485	-0.00282885	-0.00185769	0.00642322	0.000733696	0.00178365	0.00117497	-0.00285286
RBMS3	0.0041814	-0.00590909	0.00449279	-0.00184334	-0.00837879	-0.013299	-0.0128143	-0.00628728
TMTC3	0.00376076	0.000834532	0.00671863	-0.00515773	0.00434733	-0.0046716	-0.00569823	0.00433251
0	0.00256955	-0.00197985	-0.00168256	0.00217813	0.00345972	0.000329293	0.0019228	0.00188831
0	0.00225708	-0.00219266	-0.00112139	0.000791642	0.00412271	-0.000853858	0.00048773	0.000387646
RUFY1	0.00448275	-0.00213683	0.000581529	0.00135151	0.00044994	0.00207144	-0.000307112	0.00104457
RUFY1	0.00423078	-0.00345137	-0.000606387	0.00383175	0.00123375	-0.00200702	0.0019051	0.000979424
CLUHP3 /// ZNF720	0.00377676	-0.00165561	-0.00216921	0.00284889	0.00171869	-0.00049353	0.00256905	-0.00234176
SMIM6	0.00354951	-0.00304207	-0.0014452	-0.00252232	0.000964234	-0.00011833	0.00595258	-0.00116493
LOC100507201	0.00252042	-0.0019293	-0.00201824	0.000958647	0.00170116	0.00186976	0.00112767	-0.000393268
ZNF419	0.00439735	-0.00103372	-0.00252396	0.00446458	0.000978049	-0.000636175	8.38516e-05	0.00271127
LINC00526	0.00345311	-0.000220348	-3.38251e-05	-0.00390449	0.00163538	0.00128814	0.000989407	-0.000488063
GJC1	0.00394679	0.00187717	-0.00163144	-0.000741197	-0.0051154	-0.00531239	-0.000791024	-0.00477201
HCG18	0.00312301	0.00285872	0.001516	-0.00188472	0.00244766	-0.00417829	-0.00196552	0.00272106
KIAA2018	0.00260255	-0.00228872	-0.0010487	0.0029548	0.00279779	-0.00303498	-0.000251603	0.00299532
0	0.00405423	-0.00351832	-0.000224784	0.00468197	0.000670974	-0.00168513	0.00069089	-0.000535015
BX538226 /// RP11-438B23.2	0.0038944	0.00137322	-0.0012509	0.00310698	0.00144526	-0.00397436	-0.0010088	0.00135569
PHC2	0.00272073	-0.00196425	-0.00121927	0.0016696	0.00285593	-0.00208985	2.82904e-05	0.00117944
DQ570835	0.00279841	-0.000321799	-0.00054237	8.80911e-05	0.00271283	-0.00198933	-0.00122343	0.000320451
CPNE8	0.00400196	-0.00128481	0.00569932	0.00681188	-0.00467205	-0.00764543	-0.00546304	-0.000376354
IRGC	0.00238533	-0.00141914	-0.000924415	0.00191569	0.00147355	-0.00103221	0.00120884	-0.00208621
AK3	0.0096746	-0.0037655	0.0151198	-0.0102059	-0.00304609	0.00876715	-0.00796278	-0.00553903
0	0.00295292	-0.00204586	-0.00155698	0.00223623	0.00122154	-0.00118466	0.000140308	0.00237507
0	0.00406805	-0.00194452	-0.000243421	0.00331611	0.00144448	-0.00303229	0.000259561	-0.000947363
0	0.00291122	-0.00286591	-0.00155674	0.00158112	0.00204414	-0.000769582	0.000974277	0.0021975
0	0.00741303	-0.00223609	-0.00559724	0.000947785	-0.004425	-0.00533701	1.60393e-05	-0.0101795
0	0.00433716	-0.00548741	0.00684999	0.00276055	-0.00102122	-0.0102516	-0.00122407	-0.000629628
HCFC1R1	0.00771975	0.00422633	-0.00859917	0.000653017	0.00118439	0.00287315	0.00291778	-0.011875
RP11-502N13.2	0.00271833	-0.00232656	-0.00135596	0.00207625	0.00266284	-0.00204099	0.000404772	0.00121756
LINC00925	0.00311281	-0.00248605	-1.36763e-05	0.00286315	0.00473785	-0.00158544	0.00270937	0.0019627
C3orf22	0.00251677	-0.00168306	-0.000576557	0.00115441	0.00403878	0.000340472	0.00232561	-0.00033362
BC034578 /// RP11-411B10.2	0.00229098	-0.00177498	-0.00148787	0.00177127	0.00309289	-0.00102521	-0.000447818	0.0021533
0	0.00307389	0.000973044	-0.00201213	-0.00080698	0.0014836	-0.000826771	-0.000270666	-0.00104737
TARSL2	0.00689902	-0.00135366	-0.000319087	-0.0138479	-0.00539171	-0.00345921	0.00832264	0.00241244
FAHD2A	0.00489868	-0.00137191	0.00161129	0.00270262	-0.00704873	-0.00541514	-0.00209128	-0.00843031
MYO3A	0.00258506	-0.00230617	-0.00195298	0.00114133	0.00251133	-2.63995e-05	0.000718208	-0.000658284
ABTB1	0.0025258	-0.000873859	-0.00073531	0.000133573	0.00253709	-3.25692e-05	0.00101667	-0.000194088
GNB2L1 /// SNORD95 /// SNORD96A	0.00317756	-0.00102416	-0.00222535	0.000484383	0.000976942	-0.00114038	1.53538e-05	-0.00353334
0	0.00425896	-0.00200078	9.24946e-06	0.00652065	-0.00233757	-0.00544942	-0.00264239	0.000479561
IPO9	0.00329918	-0.00143259	-0.000335958	0.0019151	0.00400359	0.00187395	0.00220565	0.00189316
MAEL	0.00295893	0.000723736	-0.00072506	0.000585929	0.0018635	-0.000882405	-0.00127588	0.0036331
CDRT15L2	0.00302735	-0.00213965	-0.000838227	0.0022658	0.00245823	0.000110892	0.0018583	-0.000277641
FAM182B /// FAM27B /// FAM27C	0.00416668	-0.00271547	-0.00258865	0.00446664	0.0035165	0.000483731	0.00409043	-0.00246972
CD47	0.00362609	-0.00262147	0.000464839	0.00298799	0.0015149	-0.00368445	-0.000849705	0.00272687
MURC	0.00365028	-0.0020433	-0.00307383	0.00023292	0.00271813	-0.00260603	0.00255487	-0.00126064
HOTTIP	0.00276725	-0.00275885	-0.00224242	0.0036803	0.00177721	-0.00154706	0.000240313	0.000726409
CDC73	0.00428986	-0.00471752	0.00999165	-0.00812573	0.00455627	-0.00482062	0.00171928	0.00669585
ZNF829	0.00227358	-0.00205316	-0.0009041	0.00255041	0.00392975	-0.000808918	0.00135169	0.00111772
AC010980.2 /// LOC440934 /// LOC440934	0.0030814	-0.00232858	-0.00116107	0.000941991	0.00533359	0.00145066	0.00235587	-0.00102321
LYRM2	0.00324575	-0.00128215	0.00289809	-0.00148	0.00164882	-0.000867208	4.50057e-06	-0.00111636
0	0.00382218	-0.00339959	0.00175955	0.00604754	-0.00544215	-0.00436997	-0.00189533	-0.00324416
SCN2B	0.0073656	0.0189098	0.0126772	-0.00429149	0.017923	-0.00615364	0.00705265	-0.00757989
RP11-930P14.2	0.00263514	-0.000802123	-0.00219391	0.00220818	-0.000639634	-0.000146814	0.00158382	-0.00320223
SCARNA13 /// SNHG10	0.00285841	-0.00181541	-0.00162762	0.000790453	0.00426808	-0.00119037	0.00109495	0.00134374
AKT2	0.00301342	-0.00120969	-0.00271005	-0.00177147	0.000112054	0.00149974	0.00283258	-0.00405329
LOC101929229	0.00313632	-0.00141318	-0.00161056	0.0016308	0.000547132	-0.00255377	-4.23859e-05	0.000259424
CACNA1B	0.00620724	0.0206676	0.0001434	-0.00316564	-0.00330533	-0.00949474	-0.00353499	-0.0163674
CTD-2350J17.1	0.00284822	-0.00198075	-0.00137176	0.00290999	0.00272031	-0.000620177	-0.000132121	0.000982581
LOC100506834	0.00271233	-0.00313692	-0.000554739	0.00151152	0.00300835	-0.00286561	-0.0011217	0.00356259
NRD1	0.00376033	-0.00121562	0.0014862	-0.00484747	-0.00479765	-0.00744953	-0.000209956	-0.000562561
0	0.00223161	-0.00169227	-0.00124237	0.00155503	0.00342	-0.000275511	0.000731764	0.00116229
0	0.0027604	-0.00278744	-0.000603597	0.00213973	0.00293615	-0.00213779	0.000400492	0.000820029
U2AF1	0.0027272	-0.00203487	-0.000732511	0.00167177	0.00321153	-0.00226711	0.000586141	0.000803492
TM9SF1	0.00318172	-0.00144405	-0.0015772	0.00129497	0.000841316	-0.00166142	0.000533859	0.00137395
CAMK2D	0.00454923	0.00361108	0.0197867	0.0104781	-0.00410766	0.00354335	-0.0114265	-0.00629614
RP11-736K20.5	0.00326214	-0.00155613	-0.00164549	0.00209884	0.00176617	0.00012256	-0.00126256	-0.000254823
RP11-715J22.6	0.00314607	-0.00121997	-0.00175333	0.00110705	0.00206113	-0.000287128	0.000308022	-0.00218132
FNDC3A	0.00276047	-0.0035422	-0.00112848	0.0017668	0.00320168	-0.00229529	0.000286534	0.00373024
KCNJ6	0.00506862	0.0198356	-0.00235575	0.00394065	-0.0107235	-0.00352295	-0.0051072	-0.00178359
NKIRAS2	0.0050565	-0.00150051	-0.00559379	0.00120002	-0.00272764	0.000875996	0.00051694	-0.00247914
PCMTD1	0.00917134	-0.00119575	0.000257847	-0.010256	-0.00307803	-0.00908671	-0.00497597	-0.00213235
GALT	0.00350399	-0.00269027	0.00168433	0.00123597	0.00187555	-0.000786354	0.000497085	-0.00204824
0	0.00331709	-0.00321487	-0.000855726	0.00296298	0.0025925	-0.00182523	-0.000957884	0.00331378
STK33	0.0023067	-0.00229487	0.000756932	-0.000867263	0.00245085	-0.00207588	-0.000903464	0.000239551
0	0.00445294	-0.00636798	0.00264011	-0.00767576	-0.00418543	-0.00109827	0.0062455	-0.00638892
ZDHHC20	0.00302583	-0.0037153	0.000751135	0.00100915	-0.000184727	-0.00146612	0.0038197	0.00190644
OCIAD1	0.00837835	0.0081066	0.0277878	-0.00665545	0.0150166	0.0110732	0.00429617	0.00724805
VDR	0.00351635	-0.00214716	-0.00170832	0.00376344	-1.83819e-05	-0.0025772	0.00204984	-0.0035538
KIAA1429	0.00393972	0.00196719	-0.00116108	-0.00159685	-0.00221733	-0.00488691	-0.00171308	-0.000694526
RP5-856G1.1	0.00250146	-0.00233353	0.000323954	0.00174697	0.00242136	-0.00286935	-0.000668715	0.00242848
0	0.00314085	-0.0011377	0.000309	0.000571951	0.00284744	-0.00353086	0.00106631	0.00169494
0	0.00351198	-0.00334726	-0.000797158	0.000635622	0.0034978	-0.00114741	0.0035399	0.000609212
0	0.00312058	-0.00263093	0.000125156	0.000841809	0.00191388	-0.00130909	0.00146577	0.00187352
INPP4B	0.00313693	-0.00212286	-0.00127927	0.0016927	-0.00099706	0.00112303	-0.00440089	0.00482937
LINC00610	0.00209441	-0.00104576	-0.000503052	0.000740359	0.00173977	-0.00253215	0.000508609	0.00121953
HMCN2	0.00373801	-0.00146716	0.000391832	0.00256551	0.00128895	0.000449203	0.00114472	-0.0011095
SPRR2G	0.00299752	-0.0018873	-0.00115846	0.00259186	0.00382201	-0.00114125	-0.000804674	0.00351495
AKAP10	0.0053885	0.000719663	0.00294819	0.000945842	-0.00527149	0.0014639	-0.00332258	-0.00347846
0	0.00489501	-0.00300075	0.0012605	0.00224377	0.00246311	-6.94889e-06	-0.00330766	-0.00148943
KANK4	0.00313668	-0.00399886	-0.000627771	-0.00347036	-0.00325493	-0.00523762	0.00887755	0.00128806
SUB1	0.00976985	0.0232596	0.00321446	1.69994e-05	0.00956234	4.53402e-05	-0.00384745	0.0119543
0	0.00332828	-0.00249064	-0.000991897	0.00278638	0.000253338	-0.00433104	-0.000647673	0.0043359
BAG5	0.0037342	-0.000383978	0.0107744	0.00660609	-0.00622067	-0.0105104	-0.00465864	0.000113651
PPIA	0.00345751	-0.0010257	-0.00259989	0.00384414	0.00153132	0.00234661	0.00234538	-0.00215566
0	0.00346182	-0.00136944	-0.00227504	0.00467978	0.00155048	0.00499997	0.00216534	-0.00281961
DSTN	0.00350579	0.000820042	-0.00263192	-0.000262332	0.00143199	-0.00110234	0.00143288	0.00123048
ANKRD52	0.00345691	0.00122501	-0.00141827	-0.000590366	0.000114258	0.00034993	0.00127943	-0.00666498
LOC100506446	0.00280666	-0.000733975	-0.0023262	0.00130768	0.00155412	0.00236035	0.00219197	-0.00282358
0	0.00321189	-0.00176831	-0.00137529	0.00126327	0.00135653	0.00158148	0.00316704	-0.0019355
LOC101928419	0.00303888	-0.00133234	-0.0012847	0.00228731	0.000979797	-0.00277489	-0.00173186	0.00235319
OR7E156P	0.00356104	-0.00303859	0.000440674	0.00347875	0.00227378	-0.00152715	-0.000790331	0.00477066
FATE1	0.00299615	-0.00145884	-0.00145213	0.00185208	0.00139544	-0.000502253	0.000458906	-0.000419985
CENPU	0.00315884	-0.00210403	-0.000250849	0.00212032	0.00188844	-0.00243523	-0.000269676	0.00378934
CENPU	0.0020441	-0.00145179	-0.00134329	0.00102276	0.00211727	-0.000477313	6.02315e-05	0.000917196
ISPD-AS1	0.00252082	-0.00181876	-0.0020076	0.0014975	0.00185991	-0.00233763	0.00129972	4.39426e-05
KLHL9	0.00839394	-0.000621651	-0.000170878	-0.00401306	-0.000558451	-0.00417919	-0.000864804	0.00672774
0	0.00322232	-0.00200472	-0.00176665	0.00213985	0.00229983	-0.000113951	-9.67248e-05	4.52761e-05
DNAH1	0.00235024	-0.00126196	-0.000803246	0.00100653	0.0022244	0.0018689	0.000149715	-0.00101774
SLITRK4	0.00642793	0.0261584	-0.00299629	0.0063219	-0.00728325	-0.0167072	-0.0040683	-0.00639859
MAN2C1	0.00324547	-0.00191358	-0.00157352	0.00203676	0.00158296	0.00188536	-9.56142e-05	0.000190336
TBX5-AS1	0.00288898	-0.00267259	-0.00132847	0.00162984	0.0023916	-0.0012662	0.00174308	0.00042121
PPARA	0.00324956	-0.00412207	0.00230657	0.00130132	0.00274497	0.000684586	0.00107976	-0.00419623
GTF2H5	0.00383248	-0.0005688	0.00189473	-0.00507745	0.00750915	-0.00679353	-3.86565e-05	-0.0041709
PCMTD1	0.00475886	-0.00563964	0.000677757	0.00363131	4.05145e-05	-0.00800915	0.00186179	0.0050293
RHOJ	0.00409306	-0.00369478	0.00101473	0.00456027	0.00116904	-0.00163827	-0.00242249	-0.00209596
TACR1	0.00331692	-0.00190943	0.000169219	-0.00175248	0.00695081	-0.00122442	0.00177067	-0.00536318
ZNF471	0.00333333	-0.00130758	0.000491003	-0.00188848	0.00141365	4.8962e-05	-7.9976e-05	0.000753809
ANKRD36	0.00274667	-0.00260987	0.000793855	0.00151808	0.00582233	-0.00188658	0.0010832	0.000177378
0	0.00378221	-0.00356257	-0.000620421	-0.00124253	0.00346865	-8.85956e-05	0.000862218	-0.000726137
HFM1	0.00277211	-0.00139191	-0.00207615	9.81241e-05	0.00278552	0.000561362	0.000570457	0.000337388
LOC101929777 /// WNT3	0.0036546	0.00137167	-0.00177331	-0.000532876	0.00138752	-0.00283583	0.000850854	-0.002026
LINC00883	0.00396443	-0.00277643	0.00154402	0.00123772	0.00242679	-0.00186354	0.00348843	0.00121139
SMIM7	0.00539676	0.0040309	-0.00551828	-0.00535476	-0.00119276	-0.0012009	-0.000356141	0.000346147
SHANK2	0.00535532	0.0144195	-0.00346291	-0.000965181	-0.00043372	0.00042536	-0.0106723	-0.00546274
PDAP1	0.00315722	-0.000928252	-0.00266838	0.00293499	0.00110729	-0.00158227	0.00245572	-0.0029148
LINC00461 /// MIR9-2	0.00586543	0.00431016	0.00740462	-0.01645	0.00346476	-0.0020048	-0.00592337	-0.00248316
ZNF271	0.00394837	-0.00380217	0.00215624	-0.00568989	-0.00146511	-0.00600537	0.000631906	0.00036989
0	0.00227838	-0.000965044	-0.000206481	0.000758837	0.00225582	-0.000343625	0.000269044	0.000331717
0	0.00430214	-0.00131137	0.00331395	0.00419664	-0.0114629	-0.0101849	-0.00345039	-0.00437507
CLK4	0.00343144	-0.00419097	-0.000224228	0.00387784	0.0013359	-0.00166125	0.00132451	0.00154833
AIFM3	0.0040672	0.00118781	0.000680566	-0.000454723	-0.00333479	0.00681188	0.00177497	-0.0113192
FERMT1	0.0034864	-0.00323766	-0.000172446	-0.000284604	0.000579826	-0.00250936	0.000503873	0.00271481
TYSND1	0.00316514	-0.000963115	-0.00131627	0.000109045	0.000678684	-0.000361397	-0.00010458	-0.000564807
ADTRP	0.00303578	0.000456284	-0.00174129	-9.3671e-05	0.00131688	0.00110675	-0.00119424	0.00372923
0	0.00265812	-0.00147985	-0.00174068	0.000947261	0.00273937	-0.00110682	0.0016869	-0.00132651
EIF3K	0.00364709	-0.00134292	-0.00253443	0.00184261	0.000153889	-0.00422805	0.00130309	-0.000883053
IGKC	0.00284552	-0.000504951	-0.00356776	0.00184933	0.000790323	0.000396429	-8.85397e-05	0.000929965
0	0.00264305	-0.0027429	-0.000832821	0.00212752	0.00192754	-0.00169505	0.000343544	-0.00114585
KIAA0930	0.00490995	-0.00234857	0.00122668	-0.0121772	0.000912675	-0.00202283	0.00233639	-0.00955593
CD84	0.00334472	-0.0024792	-0.000302414	0.00141118	0.00275975	0.00151907	-0.000498347	0.00146048
H3F3A /// H3F3AP4 /// H3F3B	0.0121831	-0.00606679	-0.0011115	-0.000808269	-0.00856885	0.00319126	-0.000230853	-0.00302477
0	0.00247505	-0.00108528	-0.000839899	0.00176925	0.00275613	-0.000643112	0.0026761	0.000127706
ZNF250	0.00336775	0.000427576	-0.00315242	0.00101296	0.00189866	-0.00336326	0.00133689	0.000823908
0	0.00390783	-0.00384568	0.00624931	0.00307055	-0.00656183	-0.0059549	-0.00132228	-0.00531552
EML3	0.00410991	-0.00501835	0.000887296	-0.00111636	0.000734908	0.00665838	-0.0015293	-0.00537941
0	0.00236222	-0.00163531	-0.00173614	0.00112898	0.00263652	-0.00126796	0.00175057	-0.000774669
TUSC1	0.00769214	0.00486992	-0.0015411	-0.00745322	-0.000205075	0.000296447	0.000811962	-0.00537174
LOC730961	0.00344064	-0.00334874	-0.00134069	0.00382716	0.00375983	-0.000784479	0.000179733	0.00271864
ELN	0.00405768	-0.00347993	-0.00225259	0.000903624	0.00109157	-0.000265785	0.00182193	-0.00122893
SGCD	0.00306597	-0.00300803	0.00140347	0.00251458	-0.000710138	-0.00509894	-0.0012575	0.00164582
FAM204A	0.00332786	0.000855803	-0.000581307	0.000244129	0.000876882	-4.06436e-05	0.000434989	5.01494e-05
AHCYL1	0.00845854	-0.00570198	0.0231311	-0.00104184	-0.00272363	0.0174823	-0.0199199	-0.00544477
0	0.00307756	-0.00298452	0.000389322	0.00215059	0.0022901	-0.001883	-9.28544e-05	-0.00127848
GPR137	0.00371899	-0.00135855	0.003941	0.00486936	0.00149161	0.0013453	0.00266725	0.000675879
0	0.00247536	-0.00208252	-0.00140657	0.00228484	0.00200881	-0.00136358	0.00206916	-0.00110591
0	0.0025925	-0.0028045	-0.000999515	0.000104647	0.00472585	-0.000994483	0.00134884	0.000718143
ADAM28	0.00311628	-0.00240281	-0.0012415	0.00319368	0.0045297	0.00113548	0.00150374	0.00139527
ZBED9	0.00293965	0.00127688	0.00122037	0.000924294	0.00141683	-0.00280155	-0.00141912	0.00123319
AK025288	0.00363354	0.000269217	-0.00263578	0.00316585	-0.00555726	-0.00624013	-0.0031941	0.00228434
0	0.00297804	-0.00271114	-0.00196725	0.00232106	0.0034753	-0.000556084	0.00138771	0.000938355
0	0.00418748	-0.00126303	0.00547879	-0.00198003	0.0015124	-0.00874961	-0.00114164	0.00344514
FMNL3	0.00357874	-0.00271098	-0.00271665	-0.000160588	0.00138702	-0.00250108	0.000133391	0.0017987
0	0.00353973	-0.0023274	-0.00185056	0.00254918	0.00347476	0.000548993	0.00404156	-0.000543136
VAV2	0.00508721	-0.00308066	0.00208516	-0.00153738	0.00296743	0.00134978	0.000141797	-0.00267411
CREBRF	0.00418406	-1.99034e-06	0.00268496	-0.00213343	0.000511084	-0.00392834	-0.000985614	0.00347389
PCDH1	0.00342356	-0.00268684	-0.00120861	0.00357733	0.00118323	0.00027263	0.00245105	-0.00374237
0	0.00333525	-0.0031257	-0.00075128	0.002305	0.00145091	-0.00204679	-0.00100998	0.00237941
RRN3P3	0.00258643	-0.00184733	-0.000841674	0.000970749	0.00314706	-0.00245998	-0.00102127	0.00207899
0	0.00283022	-0.00131117	0.00215062	0.00126454	-4.30934e-05	-0.00218712	-0.00184704	-0.00104266
0	0.002786	0.00029332	-0.000139122	-0.00237142	-0.00236891	-0.00329088	-0.00105641	0.000705613
0	0.00367066	-0.00304805	-0.00155414	-0.000791819	-0.000283177	0.000578692	0.00156586	-4.30685e-06
WDR26	0.00359512	-0.00271082	0.00571593	-0.00470071	0.00513241	-0.00222115	0.000882312	0.00273789
MIDN	0.00187583	-0.000545201	-0.00147574	5.354e-05	0.00318182	0.00131102	0.00221101	-0.00232638
SLC30A4	0.00261154	-0.00222786	-0.00114284	0.00199492	0.00257752	-0.00146922	0.00345244	-0.00112995
SPHK2	0.00419174	0.00326529	-0.00243636	0.00103617	-0.00304243	0.0013256	0.00275053	-0.00114078
INSR	0.00631642	-0.00295627	-0.00615286	0.0014669	-0.0187599	-0.00371178	0.00145751	-0.00126143
0	0.0028478	-0.00275503	-0.00168959	0.00189403	0.00363723	-7.56216e-05	0.000265743	0.00135081
KLF7	0.00476455	-0.00225776	0.00221574	0.00308611	-0.00937546	-0.00334419	-0.000576478	0.000662226
SLC7A11	0.00766751	-0.00727242	0.00669813	-0.00692804	0.00343858	0.0128318	-0.0209182	0.00545269
0	0.00226662	-0.00244072	-0.00078416	0.00154308	0.00421112	-0.00144149	0.000710105	0.00186214
MYCBP2	0.0101968	0.00919138	0.0056526	0.00871672	-0.0112584	-0.007439	-0.00289066	-0.001957
DCLRE1C	0.0037213	-0.00111691	-0.00138592	-0.00159417	-0.002763	-0.00616644	-0.000423586	-0.00315996
RAB30	0.00710053	0.00364966	-0.00200463	-0.0126531	-0.0193022	-0.0173342	-0.00588206	-0.00470448
PCDHB13	0.00313409	-0.00228238	-0.00154663	0.00174889	0.00281174	0.000740393	5.07873e-05	0.00203381
NFATC2	0.00329945	-0.00353462	0.000275999	-0.00255954	0.00350518	-0.00360407	-0.00277346	0.000306386
MFSD4	0.00368594	-0.00126116	-0.000270468	0.00598471	9.13743e-05	0.00115816	0.001856	-0.00359607
ITPRIPL2	0.00402964	-0.00301966	-0.00205817	-0.00616435	-0.00443503	0.00460369	-0.0126902	-0.0073388
0	0.00318134	-0.00240578	0.000663845	-0.00230426	0.000172116	-0.00190848	-0.00215744	-0.00161867
0	0.00298746	-0.00149003	-0.000739992	0.000755368	0.00301076	-0.00196426	-0.000449174	0.000563279
MEF2A	0.00279119	-0.00304507	0.00115351	0.00222062	0.00166555	-0.000366478	0.00160101	0.00183709
UBE2J1	0.00340308	-0.00342301	-0.000516599	0.00301573	0.00437357	0.000398912	0.000810562	0.00387861
0	0.00282045	-0.00294892	-0.00205463	0.00319372	0.00300846	-0.00206006	9.87164e-05	0.00499964
ARPIN	0.00379179	-0.00319337	-0.00200616	0.005088	0.00174851	0.000816816	0.00208979	-0.00319796
0	0.00332755	-0.00426627	0.000832878	0.0017656	2.72814e-05	-0.00343269	-0.0037799	0.000840098
NOP14-AS1	0.00251039	-0.00198036	-0.00140128	0.00130538	0.0017873	-0.00122662	0.0011931	-0.00100812
MIR4657 /// PURB	0.00314948	-0.00305245	-0.00010576	0.00284289	0.00148553	-0.00258067	0.000133198	0.00286777
GAB3	0.00351643	-0.00315468	-0.00187039	0.00131187	0.0016125	-0.000235761	0.000103171	-0.000219121
TMEM245	0.00718892	-0.000854631	0.0282524	-0.00425644	0.00575308	0.00147104	0.00332716	-0.00635477
C8orf48	0.00281907	-0.0018406	-0.000108216	-6.6369e-05	0.00390733	-0.00261879	0.000454578	-0.00076892
BAIAP2L1	0.00258649	-0.00170372	-0.000215918	0.00121423	0.00192342	-0.00071848	0.00236702	0.000435787
BAIAP2L1	0.00270098	-0.00239635	-0.0013265	0.00197753	0.00285412	-0.0026645	0.00065011	0.000459803
LOC101927761	0.00247747	-0.0023433	-0.00155654	0.00326281	0.00293422	-0.00158664	0.000966298	0.0027202
ARX	0.00400553	0.0080799	2.11218e-05	-0.00376601	0.00214572	-0.00746055	-0.00714953	-0.00567628
C14orf28	0.00311689	-0.00131146	0.000911175	-0.000504903	0.00138173	-0.00122617	0.00117825	0.000750755
TMEM219	0.00270358	-0.00128109	-0.000633465	-0.00054418	0.00302251	0.000952469	0.00213571	-0.00111526
COPS2	0.00422066	0.00463662	0.000812115	-0.00171905	-0.000810049	-0.0062713	-8.74626e-05	0.00605179
MGC45800	0.00312522	-0.00233433	-0.00121558	0.0013065	0.00374233	-0.00245236	-0.000687612	0.000803854
0	0.00309273	-0.00232803	-0.00137011	-0.000671479	0.00123409	-0.00284384	-0.00170972	1.59082e-05
0	0.00389636	-0.000696756	-0.00191886	-0.00114598	-0.00217553	-8.51357e-05	-0.00106056	-0.0026831
0	0.00314495	-0.00199863	-0.000863477	0.00256676	0.00275757	0.000617876	0.000297312	-0.00103591
SASS6	0.00287894	-0.00225323	-0.00157046	-0.00152264	0.000999445	-0.00190409	0.000709779	0.00144872
PRAP1	0.00328818	-0.00145341	-0.000781854	0.00262395	0.00326361	-0.00198312	0.00149475	0.00132769
EFNA2	0.00246308	-0.00191523	6.48337e-06	0.00109563	0.00249529	-0.0013894	0.000257766	0.000274513
TRPA1	0.00284796	-0.00193846	-0.00241126	0.00272931	0.00173249	-0.00177383	-0.000833181	0.00155394
0	0.0115992	-0.00457416	0.0215862	0.00679873	-0.00735889	0.00669103	-0.00181427	0.00331248
C5orf34	0.0031297	5.4912e-05	-0.000630187	-0.000427631	0.00505718	-0.0036578	0.000115825	-0.000830347
NUP210	0.00357096	-0.00198218	-0.000714409	0.00219528	1.56992e-05	0.00115793	0.000864378	-0.000120276
NUP210	0.003866	-0.00128792	-0.000905401	0.00348196	-0.000821767	0.000322314	-5.84164e-05	0.00208069
IAH1	0.00711114	-0.00187789	0.0139339	-0.00599094	-0.00875794	-0.012401	-0.00475426	0.00201856
0	0.00346153	-0.00317064	0.00212638	0.00404555	-0.0022446	-0.00485746	-0.00338339	-0.00375294
TIAL1	0.00605438	0.00223999	-0.00130233	-0.00572756	-0.00077858	0.000475431	-0.000571061	-0.00732932
TCEA3	0.00235128	-0.00211304	-0.00157174	0.000877944	0.00288643	-0.00168423	1.88543e-05	0.000710503
NHSL1	0.00445583	-0.00410976	0.00109782	-0.0125913	-0.00104408	-0.000280536	-0.0117737	-0.00256958
PROSER3	0.00276824	-0.00169232	0.000155802	0.000412822	0.00200428	-0.00201316	-0.000404029	-0.00134229
0	0.00287764	-0.00191131	-0.00152308	0.00252703	0.00488879	-0.00130173	0.00154882	0.00309118
0	0.00271697	-0.00196104	-0.00166893	0.000512735	0.00284864	-0.00203526	0.000437293	0.00128693
RNF32	0.00305291	-0.00194305	-0.00150911	0.00212645	0.00275614	-0.00150564	0.00164144	0.00192223
0	0.00327891	-0.00345096	-0.000896089	-0.00150945	0.00322395	-0.000144053	-0.00464043	0.000934525
0	0.00442353	0.0004038	0.00125467	-0.000554839	-0.0041989	-0.00297402	0.00123405	0.000150913
CCDC93	0.00460072	-0.00273359	0.000597137	0.00301225	-8.20641e-05	-0.00358749	1.68079e-05	0.000379768
0	0.00291491	-0.00229634	-0.00147195	0.0025808	0.00389517	0.000952753	0.00329386	0.000127385
TSEN54	0.00433593	-0.00208385	0.000606766	0.00106944	-0.00287883	-0.00185115	0.0031731	-0.00268679
0	0.00282063	-0.00153532	-0.00188721	0.00124759	0.00316233	-0.00234709	0.00176591	-0.000667646
PCBP2	0.00411119	-0.00674268	0.00287406	0.00276861	-0.00414235	-0.00623022	-0.00126885	-0.00610301
DCP2	0.00348118	-0.00297101	9.90343e-05	0.00125581	0.00219173	-0.00411494	-0.000780797	-0.000381281
SLC35E1	0.00336628	-0.00220244	1.53834e-05	0.00380837	0.0022901	-0.00258547	-0.000930541	0.00391897
0	0.00342167	-0.00209994	-0.00249582	0.0029653	0.00218302	-0.000259134	0.000388893	-0.000462479
FRA10AC1	0.00342193	-0.00133045	-0.000732502	0.000376354	0.00407071	-0.00151163	0.00394073	-0.000496542
0	0.00385331	-0.00221094	-0.000933086	0.00466265	0.00099369	-0.00166587	-0.000772804	0.0019849
ADAMTSL5	0.00351892	-0.00188025	-0.000656891	0.00138665	0.00250434	0.00126503	0.00239623	-0.00149505
MIS18BP1	0.00274311	-0.0028821	-0.00165426	0.00211099	0.00371757	-0.000627173	0.00171639	0.00198186
KCNJ5	0.00301042	-0.00145547	-0.00181612	0.000877651	0.00189245	-0.00217052	-0.000720093	2.01881e-05
FLOT1	0.00360685	-8.61944e-05	0.00286381	0.00410515	-0.000303486	0.00405296	0.00297349	0.000651367
ZNF225	0.00411972	-0.0034396	-0.000222297	0.00270085	0.00487585	-0.00234746	0.000247988	0.00524412
ZNF674-AS1	0.00266874	-0.00125553	-0.00109897	-0.000553085	0.00183006	-0.00162219	-3.29914e-05	0.00114073
0	0.00339562	-0.0019802	-0.00226228	0.00261097	0.00307067	0.000355779	0.00243258	-0.000482434
MRPS12	0.00328929	-0.0011177	-0.00154799	0.00355833	0.000818353	-0.000822286	0.00184931	-0.00228873
LINC00545	0.00229214	-0.00183119	-0.00120114	0.00261178	0.00187049	-0.00118053	0.000207499	0.00155665
VPS26B	0.00399049	0.00290922	0.00172811	0.00163357	0.00286185	0.0022444	0.00271027	-0.00242859
GIMAP1	0.00261968	-0.00263449	-0.00125319	0.00105893	0.00521042	4.79692e-05	0.00157328	0.00127868
PHPT1	0.00327095	0.000103347	-0.0038432	-0.00286368	0.00313221	0.00280878	0.00161434	-0.0063557
POM121 /// POM121C	0.00867165	0.00742959	-0.00512974	7.82609e-05	0.000420385	0.00894704	0.00459655	-0.00516435
VPS53	0.00553707	0.00435762	-0.000831808	-0.00164668	0.00561894	-0.00866026	0.00275769	-0.00614149
HDLBP	0.00615154	-0.003135	-0.00136109	-0.00354806	0.00905853	0.00455518	-0.00227029	0.000713174
TUBB4B	0.0126763	0.00647418	-0.00257875	0.00611069	0.000344507	0.0104694	0.00111516	-0.00259769
NUP214	0.00359195	-0.00128641	-0.00134316	-0.00116219	0.00204592	-0.00308741	0.00106388	-0.000217436
0	0.00316105	-0.00280998	-0.00142321	0.0039625	0.000111251	-0.00191327	0.000796851	0.00189163
BTBD9	0.0050904	0.00464323	-0.00205573	-0.0012706	0.00656352	-0.00104787	-0.0020227	-0.0112985
0	0.00315871	-0.00398129	-0.00335006	0.00280927	0.00301985	-0.00384129	-0.00105346	0.00320428
0	0.00262866	-0.000949026	-0.000408512	0.000395734	0.00327136	-0.00161192	0.00131679	0.000288396
DAPP1	0.00334314	-0.00229538	-0.0019768	0.00382448	0.000948298	-0.00237454	-0.000722088	0.00346299
0	0.0030484	-0.0039989	-0.00100778	0.00250348	0.00145644	-0.00366602	0.00178827	0.00183372
C6orf57	0.00347441	0.000616337	0.00249044	-0.000566426	0.000799099	-0.00463402	0.00036407	7.99721e-05
0	0.00297491	-0.00281656	0.000936019	0.00522133	-0.00181624	-0.00227768	0.000644994	-0.00212912
DDX17	0.00322852	-0.00414002	0.00289229	0.00394007	-0.00173251	-0.00459582	-0.00103644	0.000802609
LINC01410	0.00340707	-0.00362422	-0.00321055	0.000456238	0.00163299	-0.00527621	-0.00390831	0.00394679
ALPK1	0.00334682	-0.00196924	-0.000550899	0.00282229	0.000769595	-0.000547227	7.7068e-05	0.00124305
0	0.00280035	-0.0021692	-0.00279062	0.00310094	0.0032337	-0.00459411	-0.00106845	0.0036271
ORAI2	0.00393342	-0.00398205	0.000386721	0.00325618	0.00445251	-4.35031e-05	0.00210499	-0.000917858
0	0.00365976	-0.0034375	-0.00254152	0.00421794	0.00151121	-0.00167443	0.000150974	0.00216189
PLXNC1	0.00294992	-0.00151833	-0.00100799	-0.000532523	0.00261418	-0.00175022	-3.53013e-05	0.000775749
0	0.00320409	-0.00204753	-0.00167524	0.00216454	0.00173165	-0.000653366	0.00139375	-1.99232e-06
0	0.00319972	-0.00328326	-0.000924703	0.00256576	0.00296139	-0.00122114	0.002999	0.000301804
SFI1	0.00308376	0.0012194	-0.00399932	0.00169065	-0.000245417	-0.000722886	0.00102747	-0.00460857
C3orf67	0.00300289	-0.00223956	-0.00181843	0.00237565	0.00272997	-0.000289355	0.00119721	0.00161971
KDM6B	0.00372377	-0.00157703	0.00157578	0.00679971	-0.00446751	-0.00145208	-0.000391796	-0.00573186
WSB1	0.00282747	-0.00193628	0.000811785	0.00338122	-0.000633022	-0.000621286	0.00143602	0.000628387
0	0.00335874	-0.00226316	-0.00214685	0.00295229	0.000957866	-0.00173972	0.00260973	-0.00126473
BC030152	0.00321781	-0.000566002	-0.00159806	0.000406321	0.00113529	0.00260746	0.00156334	-0.00133531
FAM102A	0.00310575	-0.00245747	5.21072e-05	0.00255251	0.0030412	-0.00221277	0.000233353	0.000699584
CA5B /// CA5BP1	0.00311779	-0.00299594	0.00120437	0.00235551	0.00213147	-0.00166874	0.00209304	0.00211002
PCMTD1	0.00287095	-0.00244346	-0.00249395	0.00252108	0.0020594	-0.000658803	0.00246014	-0.000226631
PPTC7	0.00685041	0.000125845	0.0215894	0.00713646	-0.0160255	-0.0167421	-0.000434901	-0.011902
0	0.00299441	-0.00291537	-0.000761622	0.00296223	0.00384474	-0.00142944	0.000531975	0.000417826
0	0.00285268	-0.00234517	-0.00101786	0.00208151	0.00380281	-0.000613542	0.00245824	0.000337648
SLC30A7	0.00350313	-0.0033598	-0.00164502	0.00454062	0.00172977	-0.000648529	-0.000222173	0.00155111
MSI2	0.00261567	-0.00552927	0.00282468	4.35282e-05	0.000136501	-0.00453391	0.000294591	-0.00284286
LOC646626	0.00218213	-0.00146898	0.000284183	0.00137918	0.00372046	-0.00116873	0.000212914	0.0019557
SNX20	0.00263962	-0.0011671	-0.00122841	0.00115689	0.00315892	-0.000524011	0.00112482	-0.00110489
0	0.00242301	-0.00126444	-0.00102951	0.000481132	0.00148747	0.000296788	0.000326	-0.000231942
ZNF207	0.00392799	-0.00375926	0.000979939	0.00556911	0.000220271	-0.00458445	0.000743866	0.00398433
SLC26A6	0.00357365	-0.000168049	-0.00113628	-0.000915056	-0.00145457	-0.00160595	-0.00166382	-0.00266462
SLC35F5	0.00305486	-0.0033509	-0.00169752	0.00277866	0.0036329	-0.00108593	0.00205398	0.00386978
CECR7	0.00280196	-0.00232336	-0.000606801	0.00121823	0.00400504	-0.00146725	9.3806e-05	0.00161626
MED30	0.00275196	-0.00220993	-0.00239594	0.000698491	0.00366724	0.0029217	0.00204161	0.000106106
DGKH	0.00336013	-0.00711293	0.00555509	-0.000642146	0.00960284	-0.0112669	0.00134305	-0.00570395
ZMYM4	0.00418988	0.00124567	0.00209938	-0.000232562	0.00169838	0.00188365	-0.00266115	0.00517282
EPB41	0.00569165	-0.00312003	-0.004486	-0.00961036	0.00965719	-0.0134473	-0.00320967	-0.0151915
PHGR1	0.00273523	-0.00184388	-0.00279614	0.000173945	0.00281899	0.00253249	0.00153675	-0.00135228
SEL1L3	0.00321144	-0.000160363	0.000668054	0.00364398	-0.000606734	-9.83089e-05	-0.000531865	-0.000197317
RPL17 /// RPL17-C18orf32 /// SNORD58A /// SNORD58B /// SNORD58C	0.00405505	-0.00171177	-0.00463525	0.000138771	-0.00153472	-0.00136941	-0.00140567	0.00221538
SPSB3	0.00495364	0.00335314	-0.00985057	-0.00226263	-0.00526352	0.00010007	0.000355949	-0.00372167
PCGF5	0.00311703	-0.00322491	-0.00159629	0.000374547	-6.75112e-05	-0.000779285	-0.00209414	0.00222691
LINC00319	0.0027057	-0.00240848	-0.00125989	0.000927961	0.00401284	-0.000466274	0.000568213	-8.00318e-05
FAM109B	0.00327432	-0.00159436	-0.00257237	0.00119586	0.000476323	-0.00226374	-0.00145951	-0.00134274
TNIP2	0.00489885	-0.00331591	-0.00693533	-0.000107962	-0.00256881	0.000800207	-0.00446173	-0.00232082
USP40	0.0035183	-0.0010728	-0.000247791	-0.00626072	-0.00445487	0.00368905	0.00386067	-0.00650342
LRRC75A-AS1 /// SNORD49A /// SNORD49B /// SNORD65	0.0026926	-0.00168492	-0.00215332	0.00220496	0.00422295	-0.000303153	0.00221769	-0.000294641
RNF216	0.00614749	-0.00207666	0.000322967	-0.00583228	0.0013731	-0.00828945	-0.000167529	-0.00529755
SNHG19	0.005958	-0.000689463	-0.00655836	-0.0178423	0.00172831	-0.00385024	-0.00183175	-0.0181521
AHNAK	0.0031088	-0.00309564	-0.000542437	0.00418271	0.00294834	-0.000660333	0.000402837	0.00123725
LOC644794	0.00251716	-0.00255652	0.000278077	0.00024516	0.00275267	-0.00118783	-0.000761832	0.00269659
PEX16	0.00459575	0.00123395	-0.00416508	-0.00190652	-0.0014447	0.000229299	0.00451412	-0.00318953
DNPH1	0.00352763	-0.000970712	-0.00144247	0.00468736	0.00200278	-0.0012964	-3.41501e-05	-0.00145352
SEMA4F	0.00518503	0.0057252	0.00134251	0.00311028	0.000453414	7.58989e-05	-0.000578002	-3.20535e-05
USP3	0.00381457	-0.0014076	-0.00240095	-0.00154163	0.0012209	-0.00113324	-0.000994704	-0.0020745
MFSD3	0.0036824	0.00174197	-0.000564852	0.00147813	0.0021882	0.000353276	0.00457764	-0.000272146
CCDC132	0.00547345	0.011707	0.00633607	-0.0067045	0.00407392	-0.00375349	0.00439997	0.00327787
KCTD2	0.00411606	0.00662164	0.000310769	-0.000479905	0.00217799	0.00800964	0.00339972	-0.00631799
0	0.00533644	-0.00649675	0.000677877	0.00380415	-0.000632068	-0.00579198	-0.00147335	0.00343859
KIAA1468	0.00609947	0.00260195	-0.000148992	-0.0068018	0.00505743	0.000616887	0.00587801	-0.00572391
TMEM64	0.00444334	-0.00463809	0.000239428	-0.00760365	0.00170067	-0.0021796	0.00746025	0.00451333
0	0.00258661	-0.00278492	-0.000453428	0.00123039	0.00555134	-0.000136197	-0.000437872	0.0019754
TPD52	0.0103686	0.0136477	-0.00193347	0.00124296	-0.00543724	0.000185743	0.00360592	0.00544418
FAM189A2	0.00514626	-0.00518969	-0.00469739	-0.0062699	-0.00188949	0.0140036	-0.0118494	-0.00340847
ZFYVE20	0.00758226	0.00852867	0.00155336	-0.0143055	0.00815569	-0.00410704	0.00532696	-0.00680809
SRSF7	0.00383316	-0.00315668	0.0112998	0.00146176	-0.0103404	0.00136449	0.00180205	-0.00490241
FOPNL	0.00628468	0.00572326	0.00102725	-0.00820272	0.000628529	-0.00410126	-0.00540921	-0.00154576
FBXO41 /// LOC101927826	0.00987068	0.0142621	-0.00545946	0.0121557	-0.00253348	0.00177629	-0.00460733	-0.0117152
DLC1	0.0065946	-0.00492083	-0.000267731	-0.0146057	0.00270287	-0.00960481	0.00310855	-0.0120297
MTHFR	0.00384664	-0.00113519	0.00325798	-0.00174206	-0.00157665	-0.00332785	0.000497955	-0.00483984
SRSF8	0.00804619	0.00346084	0.000925061	-0.00404597	0.0014714	0.00940293	0.00105157	0.00618268
LRP10	0.00424836	-0.0066733	0.000186637	-0.0118913	0.00345962	-0.000591262	-0.00121409	-0.00725586
SNX4	0.00574616	0.00504017	-3.40787e-05	-0.00811382	-0.00321814	-0.000482	-0.00122698	0.00928471
RC3H2	0.0089936	0.0047381	0.000807287	-0.00494801	0.00478667	-0.00481507	-0.000858976	0.00081865
RP11-403P17.3	0.00370451	-0.00275514	0.00798701	0.00135173	0.00216454	-0.00268175	0.000327876	-0.0017696
LOC553103	0.00301147	-0.00142696	-0.000751222	0.00163728	0.00246453	-0.00290976	0.000141272	0.0010514
SETD3	0.00612672	0.00054311	-0.00689453	-0.00173342	0.000851713	0.000305721	0.00140502	-0.00247743
KDM3A	0.0059689	0.000119725	0.00236423	-0.0128482	-0.000439503	0.00478324	-0.00937787	0.00274399
EML4	0.00307393	-0.00142665	0.000874576	0.00158775	0.00276194	0.000695601	0.00103082	-0.00238733
RCHY1	0.00631257	0.00559503	-0.00550122	-0.005987	-0.00369162	-0.00371563	-0.00133521	0.0073648
LGR6	0.00382576	-0.00332426	-0.00155085	0.00155255	0.000725351	-0.00221301	-0.000388043	0.00287945
VPS13D	0.00552089	0.000705457	-0.00147097	0.00218622	-0.00122478	0.00111198	0.00298627	0.00149926
LOC100131564	0.00534967	-0.00621754	0.00671927	-0.00120998	-0.00588841	0.000711716	0.00696498	-0.00517615
ZFAND2B	0.00492694	0.00258075	0.000278674	-0.00304822	0.00235	0.00240378	0.00518899	-0.00281989
MTMR12	0.00799182	0.00918888	-0.00066638	-0.0119894	0.00216214	-0.00147483	-0.00371547	-0.0059386
SPPL2B	0.00264901	-5.86671e-05	-0.00091085	-0.000835434	0.00300978	0.0036756	0.000470595	-0.00530208
LOC146880	0.00376278	-0.00180404	-0.00162635	0.00270678	0.00120293	0.00165292	0.0023902	-0.00163506
CCDC74A /// CCDC74B	0.00376653	-0.000565746	0.000639293	-0.00388126	0.00875733	-0.000291975	-0.00182154	-0.00307448
SKIV2L2	0.0057241	0.00283146	0.00150932	-0.00871002	0.000210206	-0.00333183	0.000489432	0.00125563
0	0.00270305	-0.00304199	-3.03923e-05	0.00274011	0.000715848	-0.0042314	-0.000509728	-7.61487e-05
0	0.00238372	-0.00178886	-0.000932835	0.0010782	0.00250044	-0.00128753	-0.000336693	0.00114367
TBX3	0.00247688	-0.00163982	-0.00119908	0.00180712	0.00188292	0.00149339	8.06338e-05	-0.00183106
GPR176	0.00511264	0.0065131	0.000267768	-0.00184676	0.00752678	0.001484	-0.00351101	-0.000143221
FAM46A	0.00315326	-0.00316274	-0.000959548	0.00340358	0.00276766	0.000610951	0.00252682	0.00126208
MYLK	0.00803887	-0.0123362	0.00115991	-0.0234509	-0.0121698	-0.0059493	-0.000134026	-9.28749e-05
ZNF652	0.00699719	-0.00765413	-0.00484603	-0.0118266	-0.0138521	0.00282571	0.00811252	-0.00671224
SFT2D2	0.00598484	-0.0094553	0.00543468	-0.0188549	-0.00320045	-0.00237367	-0.0105626	-0.00968604
0	0.00286359	-0.00200289	-0.00248951	0.000955883	0.00366572	-1.68586e-05	0.00224114	0.000399144
C11orf31	0.00325576	-3.3319e-05	-0.00121072	-0.000902083	0.00180347	-0.000245652	0.00215383	-0.00041489
C11orf31	0.0100687	0.0109454	-0.00467541	-0.0072013	0.00732588	-0.0074967	-0.00217379	-0.00552276
AK057657 /// RP11-473I1.9	0.00857059	0.0100189	0.0109053	-0.0034534	0.00496473	-0.00233114	-0.00344283	-3.40537e-05
FHDC1	0.00317281	-0.00307232	-0.000116701	-0.00185426	0.00648321	-0.00835893	0.00121125	-0.00263908
MEX3A	0.00317158	-0.0013915	-0.00200438	-0.000415157	0.00164303	0.000397816	0.000572408	-0.000334946
ELF3	0.00316876	-0.00243038	-0.00237521	0.00465596	0.00246005	-0.00290434	-0.000611883	0.00465189
NUP98	0.00294086	-0.00154583	0.00195108	-1.31143e-05	0.00168397	0.00207005	0.000389238	0.000815571
TNPO1	0.00503582	-0.00406801	-0.000146763	-0.00484172	-0.00447326	-0.00567861	-0.00170116	0.00346587
TNPO1	0.00390004	-0.00455751	0.00277022	-0.00414221	0.000826601	-0.000146603	1.28462e-05	0.0044906
HOXB6	0.00311455	-0.00216872	-0.00240874	0.00270956	0.000973115	-0.00266824	0.00109048	-0.000189703
TRIM7	0.0036319	-0.00165927	-0.00170866	0.00287095	0.0022653	-0.00151477	0.00115084	-0.000702509
ZNRD1	0.00332035	-0.00147779	-0.00234768	0.00216495	0.00278591	-0.00102195	0.00130742	0.000534193
SLC7A1	0.00334965	-0.00289905	0.00254157	0.00537688	-0.00260719	-0.00238489	-0.00080672	-0.00144577
UBE3A	0.00626111	0.00883069	0.00253704	-0.00439158	0.00574953	-0.00191718	-0.00616751	0.0188124
HNRNPA3	0.0103549	0.00394902	-0.0034217	-0.00235782	-0.00213042	-0.00604953	-0.0059208	0.0124895
FAM86B1 /// FAM86B2 /// FAM86C1 /// FAM86DP /// FAM86FP	0.00362322	-7.89815e-05	-1.15533e-05	-0.00103332	0.00249945	-0.00159833	5.82003e-05	-0.00361722
FBRSL1	0.00538043	0.0056535	-0.00242285	8.41943e-05	-0.00374857	-0.00095267	-0.00319152	-0.00969817
POLR3A	0.00353551	0.00501003	-0.00150616	-0.00139265	0.00308512	-0.00130916	0.000554397	-0.00310482
CSNK1D	0.00286708	-0.00174725	-0.00278218	0.00300633	0.000464832	-0.000228187	0.00131831	-0.00291052
ZSCAN25	0.00345487	-0.00182823	0.000175142	-0.000411342	0.000708529	-0.000666872	0.000805103	0.000133276
SIX5	0.00387998	-0.00305759	0.000283458	0.00165102	0.00323094	3.19726e-06	-0.0012047	-0.00107167
AGGF1	0.00484271	0.00507883	-0.000461544	-0.00115836	0.00293147	-0.0021802	0.0011214	0.00494622
0	0.00476055	0.000431554	-0.00208364	-0.003484	-0.0189963	-0.00716095	-0.00244941	-0.00343737
LOC283070	0.00852232	0.0266946	0.00318869	0.000651452	0.0122356	-0.00801537	0.00174394	-0.0187595
CCNK	0.00683108	-0.00113512	0.00114706	-0.00892209	-0.00406059	0.00267121	-0.00365927	-0.00763124
USP30	0.00658895	0.00173457	0.000876886	-0.0192791	-0.00193622	-0.00556091	0.0097184	-0.00647396
DDIT4L	0.00425942	-0.00572466	0.00108491	-0.00758116	0.00993374	-0.00362268	-0.00370207	-0.00634267
ENTPD5	0.00386009	-0.000715303	-0.00151476	-0.00614046	-0.00313251	-0.0017227	0.00170963	0.00150112
HNRNPA3 /// HNRNPA3P1	0.00686205	-0.00148253	0.00192857	-4.71197e-05	0.00138545	0.00236861	0.000567087	0.00779648
PRSS53	0.00389046	-0.00170122	-0.00444147	0.00369938	-0.00154367	0.00237314	0.00058458	-0.00499634
LIPI	0.00248921	-0.00270178	-0.00186632	0.0016289	0.00211028	-0.00138843	0.00191214	0.00223851
DUSP1	0.00474234	-0.00658869	0.00562359	0.00768247	0.00397678	0.00494707	-0.00242236	-0.00199099
KCND3	0.00775384	0.0164828	-0.000957345	0.00637217	-0.00318888	-0.00087958	-0.00558359	-0.00917726
RAB2B	0.00582246	-9.05356e-05	0.00770459	-0.0142046	-0.000816731	-0.0037737	0.00494281	-0.00492437
FAM46B	0.00248538	-0.00163326	-0.00132451	0.00125923	0.00208069	-0.00143461	-0.00141095	0.00156609
TPM2	0.0028276	-0.00213107	-0.00089775	0.000793431	0.00179904	0.000560344	-0.000220115	-0.000483988
RBFOX3	0.0082354	0.0161348	7.46322e-05	0.00868432	-0.00399338	-0.00333467	0.000997224	-0.014492
CRIPAK	0.00337246	-0.00141058	0.00194281	0.000256344	0.00386549	0.00176085	0.00369487	0.000463258
ZBTB47	0.00563703	-0.00293842	-0.000335482	-0.000573271	-0.00608723	0.0028776	0.0024091	-0.00801924
LOC100996740	0.00522924	0.00705546	-0.00388309	-0.00899448	0.000758501	-0.00445981	-0.00564446	-0.0138445
0	0.00603695	0.00219878	0.00763029	-0.0111843	0.00874144	-0.019458	0.00019109	-0.0188577
ATG4B	0.00534717	0.000921505	-0.00270583	0.00149272	-0.00157471	0.0029385	0.00302852	-0.00506634
LRRC8E	0.00343079	-0.00219641	-0.00204178	0.00291805	0.00356539	-0.000588413	0.00163726	0.00145661
BAIAP2L2	0.00335614	-0.00107953	-2.63913e-05	0.00243628	0.00290196	0.00498277	0.00199804	-0.00304548
0	0.00348584	-0.00161549	-0.0021742	0.00244413	0.000741454	6.05424e-05	-2.75118e-05	0.000147136
SYNE2	0.00318538	-0.00160915	-0.00142581	0.00152115	0.00258657	-0.000378411	0.000842831	-0.00048515
ATP6V0E2-AS1	0.003134	-0.000501289	-0.00115287	-0.00109575	0.00425076	-0.000367209	0.000379076	-0.000136224
PRR5	0.00305882	-0.000825074	-0.000997928	-0.00116701	0.00241384	0.00345811	-0.0039826	-0.00328299
ATF7	0.003999	-0.00253596	0.00135165	-0.00299977	-0.00480565	0.00200099	0.00412648	-0.00479381
CHPF2	0.00306894	0.000972831	-0.000881489	0.000958668	0.00122845	0.00169149	-0.000821146	0.000553034
NAA30	0.00490243	0.0100394	0.0037686	-0.00736449	0.00787551	-0.00390255	-0.00172389	-0.000594434
ARPC4 /// ARPC4-TTLL3 /// TTLL3	0.00366337	-0.000140017	0.00309033	0.000961548	0.00266739	0.00468778	0.00268114	-0.00231369
TTLL3	0.00358904	0.000625762	-0.00395822	0.000943929	-0.000617945	-0.000779671	0.00141051	-0.000489876
0	0.00298793	-0.00266533	-0.00105006	0.00266568	0.00316454	-0.00232728	0.00143566	0.00209367
EGLN1	0.00242222	-0.00157876	0.000390178	0.0011216	0.00313643	0.0016938	0.00166232	-0.00143118
NRROS	0.00305129	-0.00236789	-0.000471872	-0.00118818	0.00230555	0.000522686	-0.00129764	0.000826238
PREP	0.00370902	-0.00337306	-0.00132022	0.00418843	0.00401079	0.000814089	0.000260213	0.00206556
BRD4	0.0063062	0.00535828	-0.00577707	0.00191112	-0.00571538	-0.00407344	-0.00345744	-0.0112763
0	0.00284051	2.12082e-05	0.000189143	-6.09019e-05	-0.0032717	-0.00220136	-6.99214e-06	-0.00439726
DOCK6	0.00260036	-0.00105893	-0.00143004	0.00241228	0.000722952	5.23791e-05	0.000479559	-0.000178578
DHX33	0.00488601	0.00170875	0.000503023	-0.0062348	0.00612948	-0.00273955	0.00301919	-0.0067047
CCDC97	0.00292873	-0.00115747	-0.000353267	-0.00128332	0.00214269	0.00103657	0.00110336	-0.000744219
0	0.00172552	-0.00131584	-0.000437845	-9.43555e-05	0.00330239	0.00187335	0.00277553	-0.00131793
0	0.00320013	-0.00185169	-0.00178759	0.00142118	0.001577	-0.00169958	2.6875e-05	0.00114868
KCTD5	0.00312075	-0.00135244	-0.00114641	0.00161707	0.00271281	0.00184675	0.00257677	-0.00261467
0	0.0028032	-0.00216897	-0.000158879	0.00229278	0.00401716	-0.000219919	0.00212004	0.00192733
MFSD8	0.00320036	-0.00173906	0.000641235	0.000572607	0.00130801	-9.77846e-05	0.00108829	0.00128772
RP5-894A10.6	0.00307035	-0.00177293	-0.00127416	0.00162067	0.00145949	-0.00128967	0.000439699	-0.00127754
S1PR3	0.00450884	-0.00856073	-0.00177685	-0.00531943	-0.00233514	0.00657807	-0.0192697	-0.0104353
H2AFV	0.0103661	0.00119292	-0.00478331	-0.000858397	-0.00337723	-0.00404807	-0.00583165	0.00775443
MVB12B	0.0043547	-0.002648	-0.00693107	-0.00738638	-0.00696338	0.000888248	0.0105984	0.00175319
RRBP1	0.00260827	-0.00247221	-0.00117255	0.00104384	0.00478429	0.000578712	0.00261694	0.000414703
LIME1 /// ZGPAT	0.00406182	0.00138758	-0.00365338	0.00106771	0.00149422	0.000805424	0.00223356	-0.00306762
DCAF15	0.0032048	-0.00220507	-0.00177353	0.00442021	0.00064654	0.00177985	0.00246206	-0.00352247
C11orf74	0.00438058	0.00557405	-0.000890174	-0.00446331	-0.00328602	-0.00234637	-0.000509834	5.68994e-05
RAB2A	0.00883686	-0.0109832	0.00238722	0.0126359	-0.00286532	-0.00784234	-0.00317381	0.00497524
PLEKHA6	0.00588069	0.00944373	-0.00579128	-0.00545027	-0.00119396	-0.0134087	-0.000489017	-0.012749
FAM73B	0.00478988	0.00312144	-0.00408235	-9.36228e-06	0.000907849	0.00203716	0.00121493	-0.0063539
COX15	0.00322231	-0.000821311	-0.000646061	-6.51684e-05	0.00294305	0.000566475	0.00241319	-0.00175266
LOC100507487 /// LOC101927184	0.00280768	-0.00213302	-0.00215356	0.000152832	0.00238757	-0.00193488	-0.000664839	0.00145317
SLC39A3	0.00411985	-0.000789185	-0.00343901	0.000655033	0.00193573	0.0020509	0.00285072	-0.00268062
CRYBB2P1	0.00427216	-0.00168325	-0.0035445	0.00384446	-0.00123416	0.000437369	0.000460203	-0.00165984
RNF169	0.00528622	-0.000238384	-0.00315112	-0.00258593	-0.00159729	-0.00248954	-0.000475424	-0.00314191
HERPUD2	0.00566405	0.000756035	-0.000757573	-0.0100693	-0.00162881	-0.0058975	-0.00574299	-0.00392835
MAP3K1	0.00386672	-0.00599052	0.00191178	-0.00798148	-5.02376e-05	-0.0050629	-0.0058561	-0.00104562
SYNPO2	0.00435806	-0.00292822	0.00370672	-0.00627466	-0.00569508	-0.0059788	-0.0143813	-0.000366321
RUNX3	0.00322578	-0.00250944	-0.00279152	0.00220593	-0.000281158	-0.00128716	-0.00181971	-0.000202553
GATC	0.00597715	0.00384947	-0.00505567	-0.0103541	-0.00049591	-0.000734236	0.0072622	-0.00952399
SMEK2	0.00580716	0.000575482	-0.00165911	-0.00556795	-0.00351165	-0.00512334	-0.00387268	-0.00304256
CPNE3	0.00478504	-0.0103474	0.0220192	0.00818841	-0.0061507	-0.0023076	-0.0197644	0.0064032
ANAPC16	0.00558986	-0.00305605	-0.00249388	-0.0179545	-0.00516042	-0.00923085	-0.0120424	-0.0142984
ASPH	0.0028094	-0.00205498	-0.00122949	0.000507698	0.00285577	0.000892154	-0.000580854	0.000429118
CXorf40A /// CXorf40B	0.00467437	0.00236947	-0.000988158	-1.76836e-05	0.0056625	-0.00123529	0.00324885	-0.00028419
MIR210HG	0.00277362	-0.00169788	-0.00189195	0.00127469	0.00275706	-0.000164854	0.00129093	-0.000127819
DDR2	0.00323303	-0.00373466	0.000917969	0.00243447	0.00248658	0.000116168	-0.00251115	0.00335645
UPK1A	0.00268622	-0.00149332	-0.0021919	0.00129691	0.00162837	-0.00165817	0.000398638	0.00116906
ASMTL-AS1	0.00375547	-0.000360795	-0.00349457	0.00263435	0.000745782	0.000542688	0.00300535	-0.00449041
PPDPF	0.00727958	0.000551416	-0.005353	-0.00726963	0.00037201	0.00703111	0.00222017	-0.0082212
KCTD12	0.00688074	-0.00928205	0.0180512	0.0113705	-0.0102855	0.00254889	-0.0185017	-0.00695803
AP1S2	0.00774124	0.00538932	0.00885414	-0.0104896	0.00406065	-0.000225731	0.00633583	-0.00268832
0	0.00206955	-0.000747609	-0.00101278	0.000614889	0.00149565	-0.000400714	0.000608224	0.000673674
PHACTR2	0.00534166	-0.00500781	0.0124396	0.0115803	-0.00885214	-0.00780095	-0.011088	0.00287554
C17orf70	0.00332342	0.000491683	-0.00343673	-0.000418219	0.000860081	0.000581705	0.000610304	-0.00372738
0	0.00247558	-0.00312299	-0.000524447	0.000756433	0.00334464	-0.00135973	-0.000338361	0.00217242
CARM1	0.00630326	0.00331399	-0.00384797	0.00472126	-0.0083704	0.00567604	-0.0046181	-0.0152719
GLYCTK	0.00283932	-0.00126404	0.000383455	0.00107527	0.0024687	0.000814635	0.00114604	0.000214501
USHBP1	0.00298095	-0.00133983	-0.000915902	0.00125266	0.00284853	0.000693765	0.00235752	-0.00279984
0	0.00414557	-0.00206819	-0.00188742	0.00135928	0.00461273	-0.00108147	0.00206914	-0.000272605
MYO7B	0.0038696	-0.00243804	-0.00157253	0.00304127	0.00352286	0.00302733	0.00235296	-0.00261008
ENTHD2	0.00316726	-0.000762273	-0.000940284	-0.000727059	0.000430932	0.00356118	0.00199303	-0.00278759
ST8SIA4	0.00275019	-0.00221151	-0.00106707	-0.000404912	0.00282685	-0.00150092	-0.000898181	0.000832168
0	0.00264604	-0.00151323	0.000476665	0.00151036	0.00139361	-0.00185234	3.33625e-05	-0.00176989
SPIRE2	0.00474129	0.00592775	-0.00766296	-0.000960602	-0.00494863	-0.0052395	0.00157699	-0.0090655
C10orf99	0.00311394	-0.00224291	-0.00380085	0.00432875	0.00329142	-0.00393251	-0.00147921	0.00485847
C10orf99	0.0035232	-0.00173948	-0.00185507	0.00252927	0.00255481	-0.00144663	0.00066051	0.000776987
GALNT12	0.0038846	-0.00121759	-0.0016652	0.00095553	0.000613411	-0.00246054	0.0019583	0.00128845
0	0.00362313	-0.00430322	-0.000292118	0.00100204	-0.000562495	-0.00248394	-0.00162444	0.00264938
0	0.00354624	-0.00270977	-0.000677006	0.00320631	0.00256851	-0.0033753	0.0018427	-0.000400818
NKD1	0.00322518	-0.00258068	-0.00130168	0.00181587	-0.00212627	-0.003047	0.00098413	0.000994635
0	0.0067886	-0.00358625	0.00739762	0.00222188	-0.00837257	-0.00609662	-0.000778703	-0.0108139
MAP1B	0.013702	0.0047336	0.00825014	0.00952681	-0.0163038	-0.00684945	0.000225758	-0.00427476
PKM	0.00436035	-0.00177376	-0.0044062	-0.000288974	-0.00221906	-0.00291325	-0.00148693	-0.00163526
HEATR6	0.00381436	-0.0014587	-0.00195134	0.00172957	-0.000806158	-0.000362163	0.000290003	-0.00173218
CYLD	0.00760443	0.00468565	-0.000284531	-0.00939659	0.00434673	-0.00155674	-0.000536005	-0.0059487
RPLP0	0.00931341	-0.0029877	0.00344726	-0.0015135	0.000602392	0.0175426	-0.00938439	-0.00360196
AX747730	0.00194547	-0.00190597	-0.000899156	0.00113531	0.00193802	-0.0025742	0.000865771	-0.000517636
ALS2CL	0.00296672	-0.00184334	-0.00106043	0.00183374	0.00293042	0.00152865	0.000465418	-0.000562597
CYP4X1	0.00616651	0.0181861	-0.000473911	-0.00280734	0.000620663	-0.00285675	-0.00871795	-0.00481208
MAPK15	0.00294912	-0.00172482	-0.00217657	0.00234098	0.00196223	-0.00150915	0.00190748	-0.000349557
YAP1	0.00459276	-0.00652985	0.00856935	-0.00566598	0.00129569	0.0092706	-0.0158765	-0.0079461
ZNF280A	0.00300782	-0.00231199	-0.00180591	0.00348351	0.00178101	-0.00190913	-0.000866299	0.00152354
GNL3L	0.00357548	-0.00222015	-0.00185914	0.00418871	-0.000423697	0.000840544	0.00118412	-0.002931
HSPB6	0.00507168	-0.000572969	-0.00586724	0.00410072	-0.00542336	-0.00250936	-0.00159065	-0.00473056
0	0.00396403	-0.00163514	-0.000500473	0.00114805	0.000960211	-0.0031316	-0.000837139	-0.00103397
IDH1	0.00353457	-0.00200253	-0.00172893	0.00168251	0.000138543	-0.00294821	0.000441747	0.000939102
VPS53	0.00290761	-0.0013894	-0.0017377	0.00299518	0.00228653	0.00236904	0.00376627	-0.000679368
ZDHHC21	0.003604	2.0732e-05	0.00222951	0.00134685	0.00582734	0.000321803	0.00109087	0.00433513
PARVB	0.00324167	0.00604507	-0.00119638	-0.00440738	0.00565848	-0.000478225	-0.0011641	-0.0066095
0	0.00649271	-0.00165152	0.0123077	-0.0034156	-0.017238	-0.0056413	-0.00495115	-0.00741558
EHF	0.00264976	-0.00268554	-0.00213167	0.00242826	0.00388398	-0.00175205	0.000981784	0.00243989
EHF	0.00298214	-0.00196951	-0.000449359	0.00171161	0.00256993	-0.00215055	3.11772e-05	0.000584035
NLRP7	0.00308511	-0.00210194	-0.00181101	0.00121242	0.00243361	0.00291835	0.00166193	-0.00201385
LINC00086	0.00527003	0.0123483	0.00259389	-0.00684148	0.00871564	-0.00541123	-0.00490928	-0.00926884
SYCE2	0.00295422	-0.00135186	-0.00203659	0.00151669	0.00205228	-0.00189016	0.00183856	-0.000134907
NPR2	0.0060141	-0.00310392	-0.00425846	0.00267746	0.00223742	-0.00177347	-0.00153429	0.00102842
TPBG	0.00282873	-0.002719	0.00010259	-0.000110311	0.0071577	-0.00452169	0.00231906	0.00106544
GPX2	0.0032582	-0.00275871	-0.00191815	0.00350387	0.00274691	-0.00214428	0.00107738	0.00297887
AK021977	0.00412183	-0.000163123	0.00577589	-0.00125468	-0.00800157	0.00282594	-0.00699901	-0.00610505
HCN3	0.00379991	0.000574431	-0.00285662	0.00136738	0.00205267	0.000209004	0.00031869	-0.0037013
LOC100128325	0.00369052	-0.00259036	-0.000882757	0.00311736	0.0030709	-0.00133112	0.000402321	0.00204197
CHCHD7	0.00387157	-0.00225897	0.0055122	-0.00737443	0.00800152	0.00108637	0.000826379	-0.00145426
SGCD	0.00403611	-0.00167297	-0.00308115	0.00100912	-0.00358424	-0.00344064	-0.000935357	0.00232539
CCDC80	0.00317464	-0.00291838	-0.000869853	0.00263783	0.0037815	-0.000448768	0.000276618	0.00213371
0	0.00392806	-0.00144136	0.00510492	0.00450709	-0.00247841	-0.0020686	-0.00104802	0.00022257
0	0.00559994	-0.0020312	0.000168715	0.00390588	-0.00446876	-0.0039392	0.00229908	-0.000395033
RP11-196G18.23	0.00209363	8.09998e-05	-0.000588273	0.00030322	0.00134438	-0.000859875	0.00106149	-0.00122195
METTL14	0.00428793	-0.00273397	-0.000601747	0.00298188	0.00230115	-0.00462137	0.0015162	-0.00242415
PRELP	0.00447675	-0.00296677	-0.00171289	4.76998e-05	-0.00186984	0.00655068	-0.00913375	-0.00891688
0	0.00263748	-0.00143432	-0.000760211	0.00156221	0.00189443	-0.00110686	0.000944971	0.00110521
CHD1L	0.00389393	-0.00261863	0.000362387	0.000978804	-0.00177831	-0.00362468	-0.000119684	0.000937028
MTRF1	0.00351856	-0.000300968	-0.00268661	0.00126986	0.00176336	-0.00207796	0.00154648	0.000412011
0	0.00248372	-0.00206449	-0.00209366	0.00150242	0.00253272	-0.000327938	0.000383593	0.00162662
TAP2	0.00368983	0.000374829	-0.0002814	-0.00512093	0.00143172	2.37215e-05	-0.0105752	-0.00223522
0	0.00318472	-0.0018548	-0.00161284	0.00198145	0.00155271	-0.00264733	0.00280816	-0.00241273
EPB41L1	0.00201997	-0.00225749	-0.000888095	0.00118646	0.00390682	0.00126299	0.00255107	-0.000110327
KDF1	0.00296774	-0.000816462	-0.00121267	0.00152902	0.00280548	-0.000678117	0.00288697	-0.000724113
BBX	0.0072465	-0.0169609	0.0198242	-0.00335004	-0.0253058	-0.0106536	-0.00433702	0.00182254
LOC101928881	0.00351486	-0.00172043	-0.00169476	0.00287074	-0.000279087	-0.00193566	-0.000501015	0.00125445
HLA-A	0.0107401	-0.00969968	-0.00380959	-0.00255102	-0.00125538	0.0223883	-0.0127178	-0.00932313
CCDC57	0.0034329	-0.00065511	-0.00124362	0.00148343	0.00236695	-0.000928637	0.000996995	-0.00120462
AF086126 /// C16orf52	0.00290763	-0.00225131	0.000404447	0.00295001	0.00300474	0.00038178	0.000936943	0.00189059
PRMT9	0.00353659	0.000438294	0.00153445	-0.00236066	0.00231841	-0.00133112	-0.00200752	0.00158069
ATF6	0.00435116	-0.0024523	0.00611018	0.0034666	-0.00815949	-0.00564649	-0.00549252	0.000429262
CDK13	0.00268524	-0.000767211	-0.000957758	0.00232986	0.00184862	-2.66791e-05	0.00123622	-0.00335798
TBRG1	0.00338584	-0.000265118	0.001168	-0.00122327	0.00140693	0.00493189	0.0010214	-0.00154153
TRIB1	0.00202564	-0.00141319	0.000507417	0.000542881	0.00370675	0.000693898	0.00156868	-0.00155527
0	0.00515055	0.00507222	0.00176179	-0.00694079	0.00506899	-0.00838802	0.000969466	-0.0140634
PHLDA1	0.0041949	-0.00013612	0.00225639	-0.0014625	-0.00217173	0.00112291	-0.0139779	0.00685632
0	0.0039614	-0.00316568	-0.0020188	0.00281625	0.00244281	-0.0019447	0.00179992	0.000724768
DTX3L	0.00461527	-0.00367359	-0.00309117	-0.00430178	-0.00159416	4.36862e-05	-0.0172453	-0.000999171
WDR4	0.00319734	0.00490539	-0.00604366	-0.00453051	-0.000210954	-0.00250082	0.000206967	-0.00538706
MATR3 /// SNHG4	0.0104596	0.00431479	0.0171875	0.00117633	0.00272373	0.00679613	0.000555543	0.0141205
EIF2S1	0.00663592	0.00548066	0.000693103	0.00114537	0.00490777	0.00631007	-6.82249e-05	0.008791
DHFRL1	0.00502144	-0.000921629	-0.00330892	-0.00103191	-0.00203424	-0.000788558	0.00081629	-0.00475488
PIK3C2A	0.00422199	-0.00328356	0.0100675	-0.00456051	-0.00256258	-0.0108171	0.00223885	-0.00719044
MCU	0.00339145	0.000677527	-0.000325105	-0.00028788	0.000102487	-0.00349187	-0.00246361	-0.000467477
FAM20A	0.00268486	-0.00225733	-0.00086941	0.00106728	-0.000365608	-0.00189741	-0.00071765	0.00236054
METTL12 /// SNORA57	0.0028351	-0.000799662	-0.000970802	0.00215394	0.00188426	-0.001243	0.000950969	0.00021569
FANCD2	0.00286471	-0.000870281	-0.00235451	0.000280525	0.00281856	0.00037689	0.000464618	-0.0012409
ARF1 /// MIR3620	0.00606532	0.00229683	0.0322871	0.00466513	0.011892	0.0208044	0.0107701	0.000808484
GSPT1	0.00388165	0.00315724	0.00406217	-0.00492552	-0.00850995	-0.00716744	-0.00427421	-0.00634712
FAM105A	0.00285422	-0.00154171	-0.000770702	0.000691116	0.00206574	-0.00072245	-0.00114651	0.000894486
TOP3B	0.00289973	-0.000253335	-0.000626582	0.000986687	0.00120269	0.00112777	0.00228338	-0.00266632
JMJD4	0.00218858	-0.00109556	0.000946766	-0.000392493	0.00416013	0.000940468	0.00175478	-0.00119973
RAB18	0.00381662	0.00448363	-0.00199707	-0.000797637	0.00297787	-0.00342486	0.00227498	-0.00137491
TLL2	0.00331876	0.00199409	-0.00162443	0.0005983	0.00333147	-0.00333412	-0.00138106	0.00315686
RPL5 /// SNORD21	0.00335631	-0.00228974	-0.00288746	0.00281255	5.25081e-05	-0.00060134	0.00181502	0.00195534
RAB15	0.00447062	0.011381	-0.00568225	0.00189328	0.00149911	-0.000211422	0.000704368	-0.00392624
RP3-406A7.7	0.00530798	-0.0059791	0.00181361	-0.0143569	-0.00425438	-0.0023397	0.0134246	-0.0114799
BMP2	0.00338271	-0.00338349	-0.00192175	-0.000257065	0.000999224	-0.00227131	0.000411562	0.0011406
LOC157562	0.00503658	0.00299976	-0.00379425	-0.00187322	-0.0019065	0.00344821	-0.000150983	-0.00167223
RPS16	0.00327478	-0.00287176	0.00105479	-0.000303461	0.00217213	-0.00119137	0.000503492	0.000824256
RPS16	0.0135669	-0.00456215	-0.00320967	-0.00349536	0.00159704	0.0023722	-0.00305377	-0.000738228
CPSF2	0.00310655	-0.00499218	0.00429631	-0.00148462	0.00697333	-0.0028134	0.00164378	0.00155947
LRP4	0.00788825	-0.00568942	-0.00851013	-0.00712059	-0.00816109	0.00904044	-0.0124198	-0.0073468
SPATS2	0.00372486	0.00442837	0.00971619	0.00758219	-0.00911766	-0.00687145	-0.00302653	-0.00120993
CTHRC1	0.00263401	-0.00027789	-0.00103133	-0.000219816	-0.000336431	-0.00205919	-0.00156798	0.00326454
ZCCHC6	0.0034218	-0.00296522	0.00162409	0.00133399	0.00188238	-0.00116303	0.000456153	0.00210336
0	0.00243362	-0.000760729	-0.00124461	0.00305603	0.00186306	-0.000883929	-0.00036351	0.00130202
STK24	0.00416756	0.00637842	0.00800285	-0.000448818	0.00498837	0.00788783	-0.00213805	0.00337248
VWA1	0.00267744	-0.00205439	0.00175723	0.000572033	0.00345626	0.00143505	0.00338938	-0.00183554
MUC5B	0.00328974	-0.00178222	-0.00244836	0.00408414	-0.000151601	-0.00199262	-0.000818611	6.2851e-05
PFKFB2	0.00529576	-0.000251267	0.0029507	-0.0185026	0.00227722	-0.00106127	0.00296809	-0.00400728
MRPS12	0.00292633	-0.000967697	-0.00143243	0.00336731	0.000520681	0.000883165	0.00270111	-0.00165585
0	0.00255908	-0.00238535	-0.00017929	0.00151791	0.00218211	-0.000346818	0.000209535	0.000961749
OVOL1	0.00362774	-0.00121301	-0.00198642	0.00295855	0.00084316	0.000574497	-0.000169596	0.00283997
SHROOM1	0.00607816	-0.0060652	-0.00706513	-0.00372118	-0.00657188	0.0048962	0.0106609	-0.00185674
SMARCC1	0.00496948	-0.00713695	-0.00273731	-0.0071051	-0.00220881	-0.00209278	0.00212142	0.00244534
MRPS26	0.00296629	-0.00190587	-0.000351018	0.00214729	0.00293251	-0.000704428	0.00101067	0.00150933
0	0.00280573	-0.00160137	-0.00124339	0.00216428	0.00351034	9.91858e-05	0.00211572	0.00199048
COBL	0.00900184	0.0012023	-0.0101725	-0.00304745	-0.010225	0.00978677	0.0114266	-0.000909138
0	0.00362469	-0.00202736	-0.002453	0.00318279	0.00201693	-0.00165668	0.000366824	0.00058475
KLK2	0.00297662	-0.00116605	-0.00184849	0.00424425	-0.000165596	-0.00302479	0.000287085	0.00175381
0	0.00269578	-0.00140442	-0.00144568	0.0012313	0.00154282	-0.00151645	0.00141486	0.00118562
DOCK1	0.00289152	-0.00257705	-0.00189857	0.00117154	0.00179654	-0.00082253	0.00126754	0.000746327
DOCK1	0.00254068	-0.00405797	0.0026224	0.00120349	0.00373613	0.00256011	0.00326844	-0.00223639
HEPACAM2	0.00237221	-0.00268295	-0.0023479	0.00131672	0.0017467	-0.00102148	0.00130612	0.00297591
CTD-2287O16.5	0.0021879	-0.00098995	-0.00128395	0.000877721	0.00422125	0.00134503	0.00204703	-0.00265696
0	0.00449751	-0.00345282	-0.00123228	0.00106942	0.00449362	-0.00540508	0.00116633	-0.00264941
0	0.00376074	-0.00243717	-0.00284785	0.00426468	-0.000353977	-0.00238942	-0.00188743	0.00634847
POLR2J4	0.00348013	-0.00230142	0.00248021	0.00461831	-0.00135151	-0.00318375	0.00032582	-0.00170934
PYGB	0.00318272	-0.00193538	-0.000681828	0.00261792	0.00280289	-0.000540451	-0.000649825	0.00147135
LOC101930114	0.00329262	-0.00205557	0.000424482	0.00245394	0.00310998	-0.00326629	0.00134641	0.00367218
CLPTM1L	0.00223852	-0.00179631	-0.000606051	0.00158059	0.00334374	-0.000878907	0.00159529	0.00220533
TPP1	0.00365813	-0.00134535	-0.00193446	0.00268516	-0.00209024	-0.00217356	1.8795e-05	0.00011706
TPP1	0.0060873	-0.00639432	0.0196681	0.00675626	0.00238203	0.0102798	-0.0010097	0.00277638
PRR34-AS1	0.00560169	-0.00543521	-0.000207757	-0.00936222	-0.00326592	-0.00760215	0.00297512	-0.0123477
SAMHD1	0.00591731	-0.0053117	-0.00894127	-0.00631729	-0.00939553	0.000690702	-0.0064495	-0.00968986
ZNF503	0.0053703	-0.00436247	0.00587986	-0.0113701	0.00905048	-0.0111796	-0.00777488	-0.0167913
ZNF503	0.00329136	-0.0020508	-0.00107791	0.00271262	0.00236053	0.00233095	0.0026468	-0.00185645
QSOX1	0.00299631	-0.000967477	-0.000341584	0.00176515	0.00259198	-0.00278421	0.000615766	0.00219149
DOCK9-AS2	0.00241556	-0.000962014	-0.00145695	0.00194038	0.00212089	0.000930526	0.00265779	-0.00217062
0	0.00469908	-0.00572987	0.00463472	-0.00123324	-0.00488069	-0.00437314	0.00389981	0.00138518
ZNF682	0.00428379	0.000957583	-0.0024783	-0.0054885	0.00201949	-0.00437355	-0.00275805	-0.00142546
GALNT2	0.00359299	-0.000250963	-0.00318178	-0.00126319	-0.00344545	-0.00398804	-0.00188914	-0.00446456
TGFBR1	0.00686045	-0.00482147	-0.000398665	-0.0123509	-0.00136782	0.00105068	-0.0132579	0.00308268
TMEM55A	0.00721695	0.00612148	0.00257251	-0.00777883	-0.0022104	-0.0114369	0.00201488	0.00965909
ANAPC4	0.00565247	0.00614701	-0.0116662	-0.00742047	-0.00614738	-0.00439056	0.0015724	-0.00577846
0	0.00282127	-0.0022556	-0.000898004	0.00212764	0.00223033	-0.00200155	0.00153633	0.0020961
MCM4	0.00321882	-0.000298065	0.000291291	0.00152065	-0.000363331	-0.00157582	0.00192637	-0.00154113
0	0.00563364	0.000420591	-0.00917078	0.00535434	-0.0106567	-0.00537218	-0.00118678	-0.0110504
0	0.00408662	-0.00104879	-0.00358751	0.0014846	-0.00274659	-0.00338835	-0.00305199	0.00118776
0	0.00387515	-0.00382128	-0.000307876	0.00140073	-0.00119628	-0.00441595	0.000558594	-0.00417678
0	0.00403243	-0.000428821	-0.00204653	0.00188579	0.00124977	-0.00414814	0.00176822	-0.000275869
0	0.00332698	-0.00151936	-0.00167436	0.00184323	0.00337304	0.0021573	0.00261375	-0.00152367
SRRM4	0.00543426	0.0102979	-0.00146604	0.00509084	-0.00313295	0.00686243	-0.00109796	0.000691391
PHF14	0.00442016	-0.00136121	-0.000410531	-0.0020673	-0.000582953	-0.00404069	-0.00401887	-0.0018403
LOC101928869	0.00365718	-0.00381644	-0.00160744	0.00253771	0.00215494	-0.000874913	0.000548105	0.00177692
LOC389895	0.00338437	0.00212137	-0.00160284	-0.00230484	0.00321057	-0.00582339	-6.87715e-05	-0.0022466
NRXN2	0.00562114	0.00280223	0.0121592	0.0180231	-0.0128348	0.0033204	-0.00467324	-0.00834907
0	0.00332868	-0.00241728	0.00285551	0.0015898	-0.0057391	-0.00495243	-0.00395884	-0.0061213
FAM126A	0.00270957	-0.00209408	0.000249288	0.0014596	0.00211065	-0.00109171	0.00190511	0.00164537
RP11-560A15.4	0.00275391	-0.00294123	-0.00106279	0.0020355	0.00340332	-0.000440989	0.000547235	0.00297492
0	0.00396544	-0.00277787	-0.00324128	0.00414574	0.00324681	-0.000680887	0.00276372	0.00170881
0	0.00257756	-0.00105401	-0.00152941	0.00180224	0.00104519	-0.00170933	0.00162704	0.000285443
ENPP5	0.00595788	0.0139688	0.00506378	-0.00984032	0.00262369	-0.00809832	-0.00959187	0.00840454
DCC	0.00269237	-0.00229492	-0.00212356	0.00266749	0.00266426	0.00065721	0.00205028	0.00184504
TMPRSS6	0.00293596	-0.00197882	-0.00167487	0.00257018	0.00338452	0.00195749	0.00122323	-4.31312e-05
PAPOLB	0.00246551	-0.0024945	-0.00128168	0.00219875	0.00330613	8.57096e-05	0.0014129	0.0020627
LOC101929464	0.00227668	-0.00089782	-0.00082411	0.00204768	0.00220344	-0.00161688	0.000987956	0.00091377
ST8SIA6-AS1	0.00361793	-0.00307622	-0.000752342	0.00228269	0.00300922	-0.000588466	-0.00024227	0.00079147
0	0.00197693	-0.0013443	-0.000236572	0.000794224	0.00291969	-0.00238413	0.000840127	0.000140336
ANGEL1	0.00233138	-0.00165188	-0.000250757	0.00126569	0.00256869	0.000345014	0.00045542	0.000768372
LOC101929728 /// SLC35E4	0.00271964	-0.00184833	-0.0011104	0.00175305	0.00304914	-0.000640086	0.00378044	0.000720313
RP1-199J3.7	0.00269447	-0.00219305	-0.000795282	0.00104855	0.00529404	0.00271996	0.00458535	-0.00382793
ITGB6 /// LOC100505984	0.00326355	-0.00364399	-0.00245727	0.00311059	0.00328323	-0.00315129	0.00246926	0.00389092
BMP8B	0.00399022	-0.00206639	-0.00196838	-0.00179665	0.00140385	0.00199953	0.00166633	0.00136884
GPD2	0.00800997	0.00289888	0.00801073	-0.00991088	-0.000735646	0.00136951	-0.019443	-0.0113454
0	0.00277572	-0.00290958	-6.62651e-06	0.00236253	0.00261068	-0.00193942	0.000361709	0.00236995
SART1	0.0033034	-0.00232228	-0.00070316	0.00378	0.00205424	-0.000173476	0.00253772	0.000344679
0	0.00319614	-0.00246158	0.00191175	0.00238471	-0.000785063	-0.00267282	-0.000533369	-0.00210261
HOOK1	0.00493129	0.0149138	0.00722497	-0.0036258	0.00673608	-0.00716035	-0.00484889	-0.00602865
0	0.00279	-0.00223544	-0.00193763	0.00178564	0.00390773	-0.000914195	0.00221508	0.00194934
0	0.00266411	-0.00163249	-0.0026976	0.00179632	0.000222326	-0.00354125	0.00149406	0.000954351
0	0.00431752	-0.00464347	0.000823286	-0.00319799	0.00197393	-0.00422023	0.00284138	-0.00189543
SPATA3-AS1	0.00235959	-0.00201197	-0.00128575	0.00154964	0.00401409	1.81934e-05	0.00133161	0.000381953
0	0.0023473	-0.00145701	-0.00112526	0.00199826	0.00118415	-0.00127403	0.00170848	-0.00180394
RP11-330O11.3	0.00238704	-0.00223894	-0.0016631	0.0018512	0.00327865	-0.00250803	0.000497356	0.00356683
MARS /// MIR6758	0.0082625	0.00841869	-0.0081141	-0.00120578	-0.000469932	0.00194697	-0.00330154	0.00481856
MARS /// MIR6758	0.00404673	0.00234777	-0.00431698	0.00156498	-0.00377409	-0.00101553	0.000401639	-0.000905851
WRNIP1	0.00689	0.00513481	-0.00148495	-0.00366508	0.000750814	0.00682892	0.000593997	-0.00202204
0	0.00358582	-0.0022449	-0.00229238	0.00231889	0.00469043	-0.0035913	-0.000510463	0.000289174
USP22	0.0102515	0.00578442	-0.000397026	0.00348802	0.000926335	0.00582204	0.00104961	-0.00142774
PRDM11	0.00341199	0.00333209	-0.00210262	-0.00275183	-0.00146694	-0.00641093	-0.000953522	-0.00399521
PRDM11	0.00291308	0.00079189	0.000597993	0.00163895	8.60252e-05	0.0001135	-0.000255106	-0.00473938
MYO1D	0.00414612	-0.00693788	0.000981056	-0.0097941	-0.00716548	0.00276046	0.0166091	0.00830628
0	0.0033274	-0.00335117	-0.000176577	0.00185378	0.00245417	-0.00316767	0.00209505	0.000464169
MYEOV	0.00262847	-0.00144606	-0.000996482	0.00105742	0.00176833	-0.00111164	0.000462099	0.00121739
BCAN	0.00323141	-0.00231072	-0.00136558	0.00156994	0.0016893	-0.00291581	-0.000100296	-2.11461e-05
C1orf116	0.00294634	-0.00216582	-0.00113658	0.00256114	0.00292606	-0.00127623	-0.000737053	0.000837564
LRG1	0.00333662	-0.00223578	-0.00230029	0.0031416	0.00275026	0.000320167	0.00167131	0.000499339
HOXA11-AS	0.003256	-0.00236445	-9.37198e-05	0.00370843	0.00439639	0.000353851	0.000351975	0.000955306
RIN3	0.00308176	-0.00171003	-0.00245584	0.00046651	0.0001017	0.00330703	-0.0032671	-0.00185531
RP11-304L19.4	0.00315103	-0.00151616	-0.00203561	0.00215954	0.00234493	-0.000547967	0.0032222	-0.00108038
ZMIZ2	0.00393501	-0.00118888	-0.00254936	0.0012662	0.00196488	0.000473366	0.00164613	-0.00098857
C4orf47	0.00331642	-0.00414919	0.000941219	-0.00496585	0.00822553	-0.00411218	-0.00254032	-0.00266218
RP11-548M13.1	0.00549708	-0.00390645	-0.00321457	0.00444306	0.00207346	-0.00152661	0.00089465	0.0024252
CCDC14	0.00391436	-0.0023999	-0.00240921	0.00474455	0.00305203	0.000942777	0.00349843	-0.000438359
PRKCE	0.00254432	-0.00280288	-0.000906375	0.00228858	0.00268107	-0.00224343	-0.000343772	0.000845432
AP000462.1	0.00385632	-0.00316796	-0.00163869	0.00452796	-0.000155189	-0.0044862	-0.00150631	0.0030395
0	0.00321042	-0.00383367	0.00460019	0.0013915	0.000806952	-0.00425228	0.0023375	-0.00370068
UBN2	0.00237251	-0.00140664	-0.00158306	0.00166059	0.00264645	-0.000268372	-0.000130248	0.00159177
0	0.00205149	-0.00139261	-0.00185751	0.00122009	0.00216837	-0.00131497	0.000906026	0.00110481
LOC440570	0.00304987	-0.0022441	-0.00182312	0.00317642	0.00250487	-0.0010598	0.000507075	0.00226056
0	0.00374273	-0.00167456	-0.000383369	0.00331544	0.00117588	-0.00213786	-0.000344597	0.00348609
ZNF777	0.00219335	0.000376391	0.00394067	0.000570011	0.00334383	0.00261511	0.00158293	-0.00320104
SYT11	0.0106552	0.00121635	0.00612304	-0.00127846	-0.000742012	0.00486081	0.00352928	0.00374364
KIAA2013	0.00485358	-0.000487836	-0.00403166	-0.00384623	-0.00150872	0.000733269	0.00359808	-0.000458065
LOC284112 /// MIR195 /// MIR497 /// MIR497HG	0.00462503	-0.00254547	-0.00314474	0.000372758	0.0026904	0.00293707	0.000380636	-0.00477633
NDNL2	0.00449554	0.00187048	0.00414663	-0.00220657	0.00268759	-0.00140821	0.000961877	0.00240586
STX12	0.00760665	0.00527773	-0.00674377	-0.00754027	-0.00176467	0.00415672	0.00398466	0.000220252
FKBP15	0.00290357	-0.00135919	0.00197991	0.00199643	0.00173161	0.000390747	0.00209812	-0.00077997
STARD4	0.00398982	-0.000869931	0.00426485	-0.00921803	0.00750706	-0.00735329	-0.000687449	-0.00455854
BAIAP2L1	0.00332359	-0.00132689	-0.00130446	0.0014496	0.00349185	-0.000540854	0.00226966	-0.00275514
GNAQ	0.0103471	0.00585947	0.00216894	-0.00454346	-0.000241982	-0.00430466	-0.00199047	-0.00313614
XIST	0.00857591	-0.00252796	-0.00505097	-0.00383685	-0.00307176	0.00142188	-0.00101954	-0.00282925
TSHZ2	0.00378957	0.0048189	-0.00191669	0.00131095	-0.000231906	0.00062912	-0.000895738	0.000643594
UCMA	0.00268951	-0.00237057	-0.000872252	0.00131913	0.00355252	-0.00066916	0.000405675	0.00188409
ZNF385D	0.00450299	0.00573123	-0.00322793	-0.000594707	0.00260873	-0.0060121	0.000400734	0.00066071
COL1A2	0.00324403	-0.00328792	-0.000717198	0.00217173	0.00184788	-0.000460933	-0.00355884	0.00385968
EIF3B	0.00386752	-0.000977626	0.000782617	-0.00344126	-0.00190846	-0.00158686	0.000791146	-0.00367223
PPAP2B	0.00945116	-0.0181504	0.0325453	0.00924703	-0.0236748	-0.00224837	-0.0137921	-0.0168151
ADSS	0.00658334	0.00484694	0.00947564	-0.00592138	-0.00374911	0.00611297	0.00729514	0.0202842
IHH	0.00364824	-0.00266916	-0.00160302	0.00199935	0.00378579	0.00112232	0.00141259	0.00035245
MOV10L1	0.00325033	-0.00178966	-0.00208682	0.00134905	0.00322095	4.66776e-05	-0.000559574	0.00137089
C9orf84	0.00258188	-0.00322913	-0.00190959	0.00260796	0.00319149	-0.0027204	-0.00045841	0.00396492
BCL2L11	0.00322479	-0.00232559	-0.00266169	0.00432642	0.00276874	-0.000464792	0.00188691	-0.000309767
LMLN	0.00422306	-0.00175376	0.0151331	0.00093245	-0.00453182	-0.0209398	-0.00242397	-0.00725338
0	0.00462883	0.00220147	-0.000822473	-0.00364597	0.00381294	-0.00221293	0.00234372	-0.00166106
LINC00662	0.00278341	-0.00176496	-0.00116297	0.00280357	0.000555415	-0.00121966	0.00220288	8.81533e-05
LINC00933	0.00203016	-0.00211164	-0.00076007	0.00140917	0.00323428	-0.00175006	0.000987117	0.00250658
0	0.00327731	-9.33701e-05	-7.45492e-05	-0.000225564	0.000180083	-0.000231604	0.00142156	-0.00509475
AP000347.2	0.00382497	-0.00145933	-0.00248863	0.00367913	0.00159946	-0.000920392	0.00172451	-0.00212484
CEP44	0.00347694	-0.00209628	-0.00185305	0.00165915	0.00335625	-0.00241016	0.00125908	0.0010466
TXNL1	0.00355425	-0.00171474	0.00326481	-0.00145165	-0.00458252	-0.00472985	0.0018361	-0.00086011
RPS2 /// SNORA64	0.0122201	-0.00493461	-0.000812045	0.000290006	9.60747e-05	0.0141089	-0.00399744	-0.00490533
KIF5B	0.0104227	-0.00828257	0.00219757	-0.00281766	-0.00971542	-0.000116914	-0.001305	-0.00155629
PSMB4	0.00389731	0.000627248	0.00816619	0.000923074	0.00121046	0.00165439	0.00511797	0.000350331
GCLM	0.00375879	0.00380255	-0.000271504	-0.0039282	-0.000600749	-0.00361836	-0.00540174	-0.00222595
SNRNP48	0.00241549	-0.00169352	-0.00138994	-0.00188621	-8.59171e-05	-0.00257296	0.000365644	-0.00113278
LOC645166 /// LOC654342	0.00490066	-0.00088465	-0.00107911	-0.00211252	-0.0044341	-0.00778683	-0.000381248	-0.0136849
0	0.00301972	-0.00126467	-0.00272388	0.00261561	0.00109386	-0.00289853	-0.00224624	0.00136932
SLC45A3	0.00422548	-0.00617265	0.0001014	-0.00885461	-0.00438242	0.000891734	0.015682	0.000694626
DGCR6L	0.00292888	-0.00118798	-0.00120947	0.00298718	0.00231454	-0.000911859	0.00126809	-0.00244626
MRPS22	0.00618629	0.00384611	-0.00355774	-0.00556297	0.00154964	0.00318078	0.00265957	-0.00339429
RAB15	0.00558912	0.00835049	-0.0034738	0.00125244	0.0040521	0.000214199	0.00191712	-0.00490529
MAN1B1	0.00392465	0.00231473	0.000260977	0.000628853	0.000862892	0.00569476	0.00245384	0.00020753
ZNF814	0.00307723	-0.00142405	-0.000946545	0.0011034	0.00170474	-0.00225878	0.00063568	-0.000370076
PAWR	0.00330439	-0.00310684	-0.0022199	0.000876007	-0.000196764	-0.00466151	-0.000640929	0.00205784
STON2	0.00778922	-0.0105617	-0.000547679	-0.0169744	0.000350561	0.0114996	-0.0292349	-0.0188482
0	0.00815971	-0.0054805	0.0134487	0.00138051	-0.0136821	-0.00409	-0.00634945	-0.0067872
SYT7	0.00460256	0.00598397	0.00259018	0.00307453	-0.000728037	0.00357968	0.00154589	-0.0120699
CNOT6	0.00566037	0.00405679	-0.000122868	-0.00758465	-0.0035081	-0.00737155	-0.00776151	-0.0102742
EPSTI1	0.00304102	-0.00276518	-0.00205541	0.000734906	0.00222516	-0.00130132	-0.00520364	0.00240888
HECTD2	0.00270518	0.00165187	-0.000669454	-0.00206707	0.00292407	-0.00176427	-0.00265811	-0.000222395
MAP1A	0.00260038	-0.00193769	-0.00140521	0.00193965	0.000159421	-0.00172556	4.22124e-06	0.00169097
SFTPC	0.0040749	-0.00211397	-0.00185182	0.00162546	-0.000616793	-0.00206802	0.000949461	-0.000398617
MMAB	0.00340901	-0.00120823	-0.00335073	-0.00361451	-0.000968885	-0.00170019	0.00435946	-0.00454278
USP49	0.00526553	-0.000248193	-0.00200804	-0.000498989	-0.000495989	-0.00137091	-0.00174558	-0.000244781
NFASC	0.00415195	-0.00367759	-0.000363919	0.00127311	-0.00121181	0.00410655	0.00702655	-0.00167316
STAT3	0.00785477	-0.0122315	0.0129049	-0.00303621	-0.0127802	0.00336119	-0.0156155	-0.0116537
GPR135	0.00444942	-0.00414126	-0.0014759	0.00671145	0.000278678	-0.00375963	0.00210759	-0.000639367
0	0.00330494	-0.00232703	-0.00113988	0.00271717	0.00145114	-0.00365188	0.000477281	0.00233327
LOC100506406	0.00418684	-0.00479463	-0.00293364	0.00691903	0.00291939	-0.00411433	-0.000131631	0.00822346
CEP350	0.00403729	-0.00344292	-0.00137253	0.00637884	-0.000200448	-0.00227314	-0.00120168	0.00481912
ERVK3-1 /// ZNF8	0.00461114	0.00270028	-0.000736388	-0.00801384	0.00271609	0.00159914	5.96874e-05	-0.00267737
ERVK3-1 /// ZNF8	0.00570458	0.00513746	-0.00448573	-0.00897242	-0.00174897	-0.0103704	-0.00638948	-0.00135724
NPC1	0.00336322	-0.0019922	-0.00161279	0.00203187	0.0039657	-0.000743497	0.00130035	0.000109808
LRRC69	0.00312466	-0.00259714	-0.00214685	7.06537e-05	-0.00225345	-0.00229313	0.00200271	0.00260542
ZNF576	0.00313455	0.000170118	0.00173992	0.00143515	0.00136544	0.00102521	0.00322105	-0.00294761
SQLE	0.00336775	-0.00247426	0.00155261	0.002538	-0.0027151	-0.00203403	0.00136184	-0.000893688
AC018816.3	0.00359272	-0.0020612	-0.00201789	0.00303944	0.00203676	-0.00242781	-0.000423097	0.00323844
DNAJC3	0.00739993	-0.0026341	0.0024908	-0.0207684	-0.00347706	-0.00188974	-0.00660194	-0.00745485
HNF4A	0.00243031	-0.000709078	-0.00119983	0.000867363	0.00210811	-0.000544076	8.91909e-05	0.000281027
ATP11B	0.0029063	-0.00195238	-0.00129235	0.00318346	0.000956973	-0.00318438	0.0025599	0.00233443
TAF8	0.00306282	-0.00164437	0.000569032	0.00166362	0.00305152	-0.000666813	0.00132607	-9.44035e-06
0	0.00223716	-0.00250582	-0.00190421	0.00145911	0.00241473	-0.00205557	-0.000722424	0.0013139
CAPRIN1	0.00280291	-0.000572777	0.000323345	0.00126172	0.00195134	-0.00256386	-0.000853199	0.00166764
G2E3	0.0044979	-0.00114795	0.00361397	-0.00291923	0.000568836	-0.00348229	0.00168385	0.00413074
0	0.00334395	-0.00349706	-0.00228482	0.00351051	0.00290389	-0.000920601	0.00561739	-0.000896806
0	0.00250537	0.000878243	-0.00127993	0.00138129	0.0012116	-0.00334098	-0.000177677	0.00201032
0	0.00319139	-0.0035917	0.000563409	0.00352633	0.0017858	-0.00259199	0.000136744	0.000369555
CNTRL	0.00344667	-0.00430968	-0.000510607	0.00381832	0.000917726	-0.00270528	0.00287056	0.000329221
GS1-166A23.2	0.00277103	0.000165719	-0.00224937	0.00219245	0.000787009	-0.00275566	0.000796072	0.001299
NTAN1	0.00560443	0.00189633	0.00261781	-0.00513375	0.000377426	0.00257095	-0.000953345	2.00744e-05
NTAN1	0.00474445	0.00264589	-0.00697299	-0.000151222	0.000959016	7.80734e-05	-0.00279427	-0.00134437
SLC28A3	0.00287962	-0.00245873	-0.00190573	0.00184651	0.00274117	0.00156396	0.00129392	0.000856548
IRS1	0.00258684	-0.00184584	-0.00118859	0.00115202	0.00229941	-0.00295428	-0.000495257	0.00133893
LOC101060019	0.00285011	-0.00380428	-0.00129339	0.00236931	0.00375488	-0.0024288	0.000969883	0.00294849
0	0.00280562	-0.00236275	-0.00178267	0.00239678	0.00267874	-0.00141552	0.00172159	0.00294092
0	0.00279874	-0.00233351	-0.00178497	0.00167667	0.00128784	-0.00209103	0.00100225	0.000742886
0	0.00356983	-0.0034445	-0.000403327	0.00167548	0.00369915	-0.00242954	0.000279614	-0.000229257
FAM149B1	0.00345044	-0.000354792	-0.000659855	0.000987507	0.00170158	-0.00149514	0.00172231	0.000654252
SCAF4	0.00387397	-0.00257299	-0.00334698	0.00114822	-0.00327267	-0.0075724	-0.00263781	0.00419658
SCAF4	0.00374218	-0.00119745	0.00071333	0.0021247	-0.00491605	0.00113373	-0.000679052	0.00191978
MZT1	0.00253716	-0.00199392	0.00120012	0.000421019	0.00414746	-0.00256876	0.000617497	0.00310164
PSMD5-AS1	0.00295116	-0.00351684	-0.00106888	0.00286709	0.00333096	-0.00123467	0.000682623	0.00363125
BIRC5	0.00261973	-0.00116905	-0.00193278	0.00117184	0.00100417	-0.0022199	0.00124628	-0.00155482
0	0.00289039	-0.00287068	-0.00142108	0.00252473	0.00320921	-0.00166605	0.000691342	0.00249284
0	0.00320305	-0.00254867	0.00302609	0.00360079	-0.00473163	-0.00474586	-0.00236867	-0.00648618
0	0.00243557	-0.00339216	-0.00154228	0.00185654	0.00392592	-0.0018372	0.00226267	0.00147414
ITPR1	0.00270454	-0.00229867	0.00179349	7.58893e-05	0.00286496	-0.00467332	-0.00120431	-0.00476564
CYB5B	0.00420663	0.00227247	0.00359921	0.00148263	0.00590361	-0.000618873	-0.000638829	0.0037956
LOC202025	0.00285385	-0.00185072	-0.00134484	0.000559009	0.0013286	-0.000950849	0.00125449	0.00215741
FBXL20	0.00359735	0.000652702	0.00281241	-3.27293e-05	-0.00157929	-0.000759779	0.00188892	-0.00331972
FBXL20	0.00288274	0.000208581	-0.0013401	0.00044254	1.38542e-05	-0.00176306	-8.21907e-05	-0.00132788
UPF3A	0.00375538	-0.00127743	-0.00138935	0.00331739	-9.5846e-05	-0.00241085	0.000937363	0.00252399
0	0.00393103	-0.00203295	-0.00184271	0.000732193	-0.00261238	-0.00393577	0.000572603	-0.00621099
0	0.0026249	-0.00126089	-0.00141074	0.000911459	0.00195036	-0.00179642	0.00136262	0.0014586
STEAP4	0.00305647	-0.00278688	-0.00284763	0.00120089	0.00138505	-0.000298821	-0.00593473	4.44274e-05
GNAS	0.0091114	0.0118726	-0.00719322	0.0121115	-0.0155541	0.00582053	-0.00180641	0.00315993
0	0.00447999	-0.00212402	0.00565261	0.00250493	-0.010371	-0.00899209	-0.0065667	-0.00842686
EPHA7	0.0028783	0.000358019	0.0052744	-0.000864726	0.00666765	-0.00765411	0.000188236	0.00282248
MBD5	0.00287557	0.000422464	0.000608313	-0.000692964	0.00318786	-0.0025788	0.000625742	0.00237891
0	0.00392275	-0.00401549	-0.00182917	0.00262003	0.00313394	-0.00169877	-0.000127755	0.00173931
DNAJC10	0.00284202	0.000481027	-0.000225571	-0.00252332	0.00010292	-0.00405466	-0.00125373	0.00097059
PTPDC1	0.00348244	-0.0037173	0.00856738	-0.00193759	0.000286201	-0.00716387	0.00572293	-0.00513039
PDE7A	0.00283728	-0.00311218	-0.00156702	0.00272836	0.0018716	-0.00168582	0.0011304	0.00364024
ALG1 /// NAGPA-AS1	0.00306507	-0.000942351	-0.00186558	0.00161709	0.00232205	-0.00164809	0.00138337	0.00112632
KPNA1	0.00474541	0.00220959	0.000789957	-0.00285456	0.000939856	0.00395461	-0.00201093	0.0029793
PTPRA	0.00353786	-0.00248031	-0.00239647	0.00155726	0.00276668	0.00115458	3.8994e-05	0.000953962
SDK2	0.00439103	-0.00256302	-0.000821721	0.00460828	0.00237907	0.00085739	0.000878098	0.00214778
ZKSCAN1	0.00613476	1.39427e-06	0.016487	-0.00788988	-0.0100487	-0.00160039	0.00844418	0.00336048
0	0.00333914	-0.00164937	-0.00223292	0.00306237	0.000757682	-0.00400651	-0.000769365	-0.00092124
CERCAM	0.00766034	-0.0111113	-0.000996507	-0.0206669	-0.0160268	0.00759645	0.0370272	-0.0141187
ARL6IP6	0.00380813	-0.00231431	-0.00220794	-0.00244715	0.000656473	-0.0037636	-0.00180061	0.00257522
0	0.00306688	-0.00221881	-0.0021514	0.00246238	0.000997863	-0.00186136	0.00222633	-0.00120949
0	0.00326286	-0.00155008	-0.0017961	0.00280028	0.00295219	0.000473513	0.0027729	-0.00441959
0	0.0033733	-0.000706824	0.0043751	0.00171338	-0.00141139	-0.00602723	-0.000220805	-0.00406356
TOX4	0.00411275	-0.00254995	0.000289199	0.00104918	0.000269118	-0.00184419	-0.000695971	-0.00333757
RP4-740C4.7	0.0041558	0.00380467	-0.00389144	-0.00115937	0.00240142	-0.00727781	-0.00340365	-0.00244939
DGCR14 /// TSSK2	0.00339268	-0.00175603	-0.00149205	0.0011432	0.000419525	-0.00393113	-0.000240533	0.00274008
LOC654342	0.00340142	-0.00232982	-0.00177731	0.00330291	0.0037622	-0.00140355	0.00225698	0.00301474
GTPBP8	0.00243359	-0.00163117	-0.00160563	0.00107805	0.000724296	-0.00186956	-0.000243944	0.00111617
TCF7L2	0.00568515	-0.00464703	0.00181862	-0.00177737	-0.000216567	0.000927381	-0.00876558	0.00402312
HNRNPC	0.00925432	-0.00702219	0.000867842	-0.00582017	-0.000680843	0.0125229	-0.000764625	0.000680188
SON	0.0043799	-0.00357676	0.010638	0.00892975	-0.00870337	-0.0032998	-0.00242664	0.000904035
UBQLN2	0.00457898	0.00388658	0.00557752	-0.00568232	0.0088319	-0.00974612	-0.00193331	9.66737e-05
0	0.00366855	-0.00123237	-0.000986326	-0.00332174	0.00381054	-0.00770899	-0.00318596	-0.00514368
0	0.00398685	-0.00311645	-0.000325665	0.0038831	-0.000776325	-0.00090739	-0.00469207	9.80847e-05
0	0.00289008	-0.00292588	-0.000978262	0.00249454	0.00172366	-0.00264264	-0.000194734	0.00118386
SPICE1	0.00336143	-0.000866056	-0.00180058	-0.000813476	0.0011352	-0.0028138	-0.00463818	0.000501928
0	0.00261557	-0.00239454	-0.000729671	0.00128408	0.00127436	-0.00131946	0.000898693	0.000130174
0	0.00397136	-0.00313675	0.00835989	0.00566619	-0.00504291	-0.00859273	0.00106013	-0.00257963
RP11-466A19.8	0.00280866	-0.00297097	-0.00203845	0.00332292	0.00259306	-0.00326317	0.00104426	0.002569
0	0.00294568	-0.004382	0.00282096	-0.000480191	0.00255359	-0.00398994	0.00324899	-0.000140809
KBTBD8	0.00436212	-0.00128755	-0.00183956	0.0014889	0.00536945	-0.00384993	-0.000656213	0.00450419
0	0.0031463	-0.00320919	-0.00106524	0.00158755	0.00359934	-0.00106641	0.000328971	0.00322929
GEMIN6	0.00370731	-0.00100196	-0.00156508	0.000214654	0.00169304	-0.00158745	-0.000830703	-0.00180467
0	0.00247898	-0.00238639	-0.0012393	0.00243158	0.00351055	-0.00160991	0.00165792	0.00203336
COCH	0.00384121	-0.0133254	0.0109662	-0.025733	0.0488544	-0.0223995	-0.00049186	-0.0207608
FOXR1	0.00281062	-0.00209918	-0.000940776	0.00227967	0.00342452	-0.00209782	0.00111355	0.00208904
FH	0.00721429	0.0104347	-0.00606703	-0.00333887	-0.00106996	-0.0022007	0.00197361	0.00475666
ASMTL	0.00670331	0.00548592	-0.00901181	-0.00576802	0.0083951	-0.00138508	-0.00132907	0.00741237
TMED3	0.00280217	-0.00147735	-0.001777	0.00296411	0.00305623	-0.00112986	0.000979493	0.000536114
EZR	0.00493544	-0.0069351	0.0148276	-0.00292189	0.00758779	0.0138955	-0.00959674	-0.00371912
TOB1	0.00902554	-0.00649193	-0.000638834	-0.0121733	-0.0106502	-0.0104489	-0.0192361	0.0167015
PRPF40A	0.00452184	-0.00422328	0.00428618	0.0049704	0.00144731	-2.30714e-05	-0.00151917	0.00105049
SMIM22	0.0024578	-0.00170208	-0.00059096	0.000950347	0.00339052	-1.07288e-05	-4.7467e-05	7.03941e-05
DMGDH	0.00311016	-0.00223805	-0.00117655	0.000443409	0.00464089	-0.000934288	0.000542645	0.000433729
EFCAB14	0.0052078	-0.00673283	0.00689539	0.0044475	-0.00309566	0.00261612	0.00251208	0.00321728
HELQ	0.00297045	-0.00320766	-0.00233984	0.00420725	0.00235237	-0.00294354	0.00219271	0.00361547
WIPF2	0.00520058	0.00597618	-8.63557e-05	-0.00196913	-0.00385055	0.00198596	-0.00363475	0.000235804
FCRL1	0.00306204	-0.00247881	-0.00133074	0.00323735	0.00229264	-0.00228172	-0.000619587	0.00281131
0	0.00427	-0.00384921	-0.00258639	0.00381961	0.000938653	-0.00113527	0.00212716	0.000729134
CHST13	0.00252611	-0.00105779	-0.000765584	-0.000217769	0.00207856	-2.64404e-05	0.00307912	-0.0018316
SLC25A47	0.0033947	-0.00242422	-0.00112656	0.00282843	0.00406216	0.00124358	0.00165346	0.00160388
0	0.00319196	-0.00198298	-0.00176321	0.0025359	0.00164922	0.00260487	0.00078606	-0.00119566
0	0.00286362	-0.00188964	-0.00115301	0.00255793	0.00159817	-0.00479406	-0.000745651	0.00372054
0	0.00338025	-0.00381839	0.00156935	0.00342587	-0.0010391	-0.00204718	5.38342e-05	-0.00867354
0	0.00275475	-0.00244332	-0.000631365	0.00334728	0.00428806	0.000399172	0.000122894	0.00184715
0	0.00377411	-0.00350429	-0.00283797	0.00469883	0.00228817	-0.00219306	0.000833925	0.00217624
0	0.0032692	-0.0023956	-0.00128968	0.00457335	0.000448733	-0.00163881	-0.000388866	0.00312014
0	0.00265216	-0.00244426	-0.000261524	0.0025602	0.00403802	-0.000929052	0.00101755	0.00206482
MMAA	0.0044627	0.000604278	-0.00100447	-0.0024481	-0.00252518	-0.00785428	-0.00642727	0.000108482
RHEB	0.00339001	-0.00337125	-0.00064475	0.00113292	0.00348114	0.00155094	0.00252938	-0.00192445
0	0.0027433	-0.00326387	-0.000834453	0.0022339	0.00208486	-0.000849744	-0.000111522	-0.00080836
0	0.00379137	-0.00136728	-0.00223629	0.00180252	0.00356455	0.00048433	0.00160197	0.00152674
SCD	0.00637542	-0.0102288	0.0169472	-0.00271938	-0.0111503	0.0178595	0.0278602	0.00748749
CEP104	0.00316932	-0.00278769	-0.000117058	0.0021027	0.00179833	0.000109349	0.00105341	-0.00247269
ARHGEF39	0.00217096	-0.00223698	-0.00151586	0.000943108	0.00263809	-0.00331146	-0.000376165	0.00332319
RP11-846E15.4	0.00490745	-0.00711859	-0.00527395	-0.00674519	-0.00397557	-0.00281519	-0.000597167	0.00312329
CELF4	0.00492171	0.0100915	-0.000921914	-0.00152358	0.00069525	-0.00546733	-0.00837496	-0.00744848
LOC728743	0.0028916	0.000352732	-0.000137348	0.00116834	0.0026288	-0.000278125	0.00300437	-0.00140776
NENF	0.0035165	-0.00201107	-0.00303582	0.00205851	0.000422648	-0.000257405	-0.00152742	0.00259684
IQGAP2	0.00310783	-0.00287532	-0.00164537	0.0022435	0.00486709	-0.0022525	0.000654793	0.00174775
XPO7	0.00382464	-0.00233225	0.00123758	0.00219177	-0.00110802	-0.00396693	0.000284758	-0.0018239
EIF3C /// EIF3CL	0.00842145	0.011349	-0.00921925	-0.00220694	-0.00105363	0.0123085	-0.00183661	-0.00774733
SCAF11	0.00607834	0.00428252	-0.00513012	-0.00215654	-0.00203908	-0.00100605	-0.00100801	-0.000905233
MIR4745 /// PTBP1	0.00400404	-0.0042388	0.0042737	0.00695129	0.000252962	0.00891784	0.00276907	-0.00350695
CYAT1 /// IGLC1 /// IGLV1-44	0.00326874	-0.00171331	-0.000379137	0.00192505	0.00174335	-0.000716186	0.000542338	0.000896961
0	0.00262468	-0.00190684	-0.00145804	0.00179238	0.00245479	0.000328524	0.00207222	-0.000757621
LOC102725022	0.00326906	-0.00190556	-0.0017948	0.00228155	0.00353729	0.000801006	0.002021	-0.000738516
0	0.00281343	-0.00262961	-0.00256706	0.0024491	0.00284578	-0.00236502	0.000889723	0.00387867
0	0.00282958	-0.0026915	-0.000943365	0.00133417	0.00405643	-0.00108618	0.00273695	-1.53656e-05
0	0.00306417	-0.00295944	-0.00154032	0.00321893	0.00363595	-0.00178631	-0.00142507	0.00270009
0	0.00365009	-0.00363766	-0.000992708	0.00434999	0.000583092	-0.00147628	-0.00274861	0.00221297
ERCC2	0.00319632	-0.00105242	-0.000383131	0.00167735	0.00140136	0.00129362	0.000573317	-0.0019907
0	0.00284692	-0.00206819	-0.00138547	0.000740934	0.00325665	-0.00172721	0.000813745	0.00161845
0	0.00280627	-0.00139057	-0.00135188	0.000656246	0.00267885	-0.000258865	0.00109127	-0.0028442
0	0.00290121	-0.00267935	-0.00114178	0.00260497	0.000434572	-0.00156533	0.00139059	-0.00241126
0	0.00374518	-0.00309309	0.000814751	0.00377726	0.000689276	-0.00270779	0.00142615	0.00124461
0	0.0033349	-0.00145872	0.00198889	-0.00207125	-0.00166441	-0.00228196	-0.000176863	-0.00292228
0	0.00335684	-0.00161207	-7.10713e-05	0.00250578	-0.0008297	0.000276731	0.00131995	0.000994733
0	0.00297786	-0.00227304	-0.0014093	0.00250525	0.00362459	-0.00167722	0.0011142	0.00197622
0	0.00323662	-0.00238629	-0.00072546	0.00241858	0.00220643	-0.00237296	-0.000602626	0.00381425
CYB561A3	0.00387979	-0.00261809	-0.00164165	-0.00016247	0.000385932	0.00106971	0.00103406	-0.00205563
SUMF1	0.004798	0.000264957	-0.00125608	-0.00950531	-0.000803239	0.00231904	8.75763e-05	-0.00204654
FKBP7	0.00271117	-0.0024376	-0.00194104	0.00288859	0.00067329	-0.00286673	-0.000899517	0.00107723
RP11-796E2.4	0.00342724	-0.00194818	-0.00251581	0.00237434	0.000988651	0.000855486	0.00254302	-0.00175443
PTPLAD2	0.00299562	-0.00184131	-0.00189045	0.00188917	0.00246122	4.57269e-05	-0.000237687	0.00115596
0	0.00382394	0.00156063	-0.00190149	-0.0049155	-0.00518802	-0.00721193	-0.000402018	0.00237935
OXCT2	0.00280486	-0.000988524	-0.000979257	0.000951798	0.00199108	-0.00155881	0.00129244	0.00108521
0	0.00386418	-0.00300097	-0.00262115	0.00385728	0.00247976	0.00370701	0.0017345	0.000451542
MIPEPP3	0.00293239	-0.00137134	-0.00209869	0.00108998	0.00108479	0.000367868	0.00155739	-0.000938233
LOC102724517 /// NLK	0.00314618	-0.000544189	-0.000773822	-0.00253004	-0.000947262	-0.00265846	0.00188465	-0.000351412
0	0.0034859	-0.00331313	-0.00192886	0.00205755	0.00212018	-0.000916766	0.00331521	0.00154395
SLC35D2	0.00480639	-0.00507461	-0.00117239	-0.00527296	-0.0101758	-0.00181951	0.0093829	0.00109158
0	0.00388063	-0.00222043	-0.00354089	0.00192471	-0.000808069	-0.00381857	0.000438747	-0.00793324
0	0.00254636	-0.00311812	-0.00265544	0.00162302	0.00479589	-0.000886626	0.00141292	0.000630656
0	0.00277732	-0.00356517	-0.000464952	0.0025186	0.00294633	-0.00473747	4.25516e-05	0.00180634
NLRC3	0.00263173	-0.00378245	0.00183611	0.00125882	0.00421752	-0.00175582	-0.000351076	0.00138845
0	0.00301596	-0.00197358	0.000190805	0.00109663	0.00360681	0.000166175	-0.00017575	0.000412078
0	0.00268394	-0.00150302	-0.00148273	0.00220734	0.00251244	-0.00141287	0.000634765	0.00217279
0	0.00294379	-0.00343335	-0.00176958	0.00302263	0.00336214	0.000284708	0.00195576	0.00175716
0	0.00279482	-0.00257432	-0.000774499	0.00271049	0.000962481	-0.00338252	-0.00125034	0.00289248
0	0.00353378	-0.00238595	-0.00257521	-0.00268356	0.000763676	-0.00272692	-8.32222e-05	-1.40048e-05
GFRA3	0.00270896	-0.00188607	-0.0015062	0.00141937	0.00182226	-0.0026917	-0.00064267	0.00312158
0	0.0034406	-0.00298156	-0.0012647	0.00200831	0.000836943	-0.00409861	-0.00123423	0.00253168
0	0.00305764	-0.00277161	-0.00206413	0.00263739	0.00332948	-0.000700458	0.00312422	0.0029058
0	0.00361731	-0.00141116	0.00039597	-0.000133633	0.00324096	-0.00154862	-0.000795697	-0.00018577
0	0.00259048	-0.00148075	-0.000871932	-5.25315e-05	0.000615642	-0.00124123	-0.000131335	-0.000259738
ACTR2	0.00400453	-0.000332737	0.00947905	0.00836336	-0.000467301	0.00187263	0.00211273	0.00426747
KRT222	0.00511088	0.0128865	0.0126776	-0.000614568	0.00773036	-0.0131983	0.00855872	0.00303263
0	0.00275978	-0.00222972	-0.000592243	0.00198452	0.0026038	-0.000901618	0.00121315	3.62302e-05
[truncated: 42,830 more rows]

## Sheet: Steady state process
	steady state										Subgroup of 425 transcripts that participate solely and contribute the most to the steady state process (i.e. were assigned G0>0.012)
Gene Symbol	Gi0										Gene Symbol	Gi0
DAPK3	0.000717574										NARS	0.0120011
ASCL2	0.00089775										APP	0.0120077		Note: The gray box marks the transcripts assigned G0>0.008, which were considered to contribute to the steady state process. These transcripts may participate in other unbalanced processes as well. The orange box marks a subgroup of 425 transcripts that were assigned G0>0.012. These transcripts were the most stable, and participated solely in the steady state (i.e. did not take part in any of the…
SOX18	0.00129125										TF	0.0120085
PITX1	0.0013101										NDUFB8	0.012009
PTGER1	0.00131812										RP5-882O7.1	0.0120171
NRTN	0.0013421										RPL12	0.0120214
0	0.00136378										NACAP1	0.0120229
SFT2D3 /// WDR33	0.00143128										COLCA1	0.0120342
0	0.00144756										ANK2	0.0120345
GLI4	0.0014759										OPHN1	0.0120353
RASIP1	0.00147799										ATP6V0C	0.0120353
OMP	0.00148021										COX4I1	0.0120369
DRD4	0.00148209										RPL8	0.0120392
0	0.00150047										COX7A2	0.0120412
0	0.00150739										NEFL	0.0120425
NR2F2	0.00151706										APLP2	0.012055
0	0.00152401										NAP1L1	0.0120609
KRTAP10-12 /// KRTAP10-7	0.00153921										H3F3A /// H3F3B /// MIR4738	0.0120641
NPW	0.00154027										TRIM2	0.0120645
LINC01089	0.00156706										TUBB2B	0.0120707
LEPREL1	0.00161751										ATP6V0E2	0.0120802
WWTR1-AS1	0.0016314										FAM107A	0.0120819
PITHD1	0.00163352										CNP	0.012084
0	0.00163405										ATP5J	0.0120866
GLI4	0.00163516										PARK7	0.0120876
TSPY26P	0.00163781										MYL6	0.0120998
RBMXL2	0.00164046										STXBP1	0.0121039
0	0.00165468										PCDHGA1 /// PCDHGA10 /// PCDHGA11 /// PCDHGA12 /// PCDHGA2 /// PCDHGA3 /// PCDHGA4 /// PCDHGA5 /// PCDHGA6 /// PCDHGA7 /// PCDHGA8 /// PCDHGA9 /// PCDHGB1 /// PCDHGB2 /// PCDHGB3 /// PCDHGB4 /// PCDHGB5 /// PCDHGB6 /// PCDHGB7 /// PCDHGC3 /// PCDHGC4 /// PCDHGC5	0.0121043
SLC30A1	0.00165622										HIPK2	0.0121073
LOC100288181	0.00165859										VDAC3	0.0121107
DUS3L	0.00166066										CST3	0.0121152
0	0.00166508										PNMA2	0.0121196
0	0.00167135										LDHA	0.012121
IGLC1 /// IGLV9-49 /// IGLV9-49	0.00167659										STMN2	0.0121305
LOC100506282	0.00167724										SPTAN1	0.0121354
0	0.00167841										PEG3	0.0121396
TRUB1	0.00168007										TPPP	0.0121419
WNT1	0.00168492										SEPP1	0.0121425
ZCCHC3	0.00168683										ATP5I	0.0121465
0	0.00169086										MTCH1	0.0121509
TOR4A	0.00169346										PPP1CB	0.0121542
DMRT3	0.00169497										PREPL	0.0121612
0	0.00169799										NDRG2	0.0121697
LRIG1	0.00169934										ARL6IP1	0.0121707
EFEMP1	0.00170154										HNRNPA2B1	0.0121785
GADD45GIP1	0.00170748										RPS16	0.0121787
PCDHGC5	0.00172287										SCG5	0.0121813
RP11-77H9.8	0.00172496										H3F3A /// H3F3AP4 /// H3F3B	0.0121831
0	0.00172552										HBA1 /// HBA2	0.0121858
0	0.00172928										RPL13 /// SNORD68	0.0121871
HOXA11-AS	0.00173082										ANK3	0.0121957
0	0.00173472										NBEAL1 /// RPL12	0.0121985
CD300A	0.00173482										GABARAPL2	0.0122007
TRIM65	0.00174847										LOC101930075 /// LOC102724993 /// NPIPA1 /// NPIPA2 /// NPIPA3 /// NPIPA5 /// NPIPA7 /// NPIPA8 /// PKD1P1	0.0122075
VTI1A	0.00175076										RPL18	0.0122157
0	0.00175242										HSPA2	0.0122199
ALG5	0.00175609										RPS2 /// SNORA64	0.0122201
IGH /// IGHA1 /// IGHA2 /// IGHD /// IGHG1 /// IGHG3 /// IGHM /// IGHV4-31	0.00175782										TUBB4B	0.0122261
0	0.00176159										PPP3CA	0.0122293
0	0.00176532										LOC100508408 /// RPS13 /// SNORD14B	0.0122324
TRPC7	0.00176998										IL6ST	0.0122359
FZD8 /// MIR4683	0.00177262										RNU86 /// RPL3 /// SNORD83B	0.0122374
ZNF503	0.00177527										SARAF	0.0122556
ITGA2B	0.00177536										HSP90AA1	0.0122638
KRT13	0.00177738										RPS19	0.0122657
ARHGAP27	0.0017782										GDI1	0.012266
FBXL22	0.00178135										ZFAND5	0.0122727
0	0.00179197										SCD5	0.0122796
0	0.00179576										STUB1	0.0122808
C1orf228	0.00180028										DDX5 /// MIR3064 /// MIR5047	0.0122821
KCNK16	0.00180167										EIF3L	0.0122865
OR14J1	0.00180279										ITM2B	0.0122867
0	0.00180742										MT1H	0.012288
0	0.00180814										RPS2 /// SNORA64	0.0122903
LOC102723600 /// MIR1302-10 /// MIR1302-11 /// MIR1302-2 /// MIR1302-9	0.00181166										ALDOC	0.0122974
CCDC42B	0.00181649										FEZ1	0.0123007
0	0.0018178										HBB	0.0123054
0	0.0018184										SEPT7	0.0123102
GRIN2D	0.00181969										HIGD1A	0.012318
AC005592.3	0.00182062										CKB	0.0123191
LOC101927668	0.00182307										ADD3	0.0123194
SLC19A1	0.00182997										DNM1	0.0123199
CCDC124	0.00183662										SYT1	0.0123206
VWA1	0.00183816										UQCRB	0.0123285
PRX	0.00183843										0	0.0123327
0	0.00183869										ABAT	0.0123354
WHSC1L1	0.00184323										RPL13 /// SNORD68	0.0123379
ATE1	0.00184867										CLTC	0.0123472
MRPL12	0.00184906										RPL23 /// SNORA21	0.0123514
0	0.00185238										RPL22	0.0123527
TMCC1	0.00185358										0	0.0123546
AL928742.12	0.00185427										ATP5E	0.0123558
HTATIP2	0.00185693										0	0.0123627
NEFM	0.00186239										YWHAZ	0.012371
PTGES3L	0.00186847										CALM1 /// CALM2 /// CALM3	0.0123755
TARSL2	0.00186909										GPM6B	0.0123771
ZBTB32	0.00186992										GPRC5B	0.0123777
EGLN2	0.00187046										NPTN	0.012381
MIDN	0.00187583										0	0.0123931
SLC25A42	0.00187746										0	0.0123931
0	0.00187889										RPL24	0.0123991
ZNHIT2	0.00188014										ITM2B	0.0124031
MMP23A /// MMP23B	0.00188231										RPS7	0.0124096
NHLRC2	0.00188266										PFN2	0.01241
RAB7A	0.00188649										YWHAB	0.0124183
0	0.00188679										PEBP1	0.012421
ADAD1	0.00189133										PEBP1	0.0124219
EHD4	0.00189246										CPE	0.0124249
0	0.00189266										ACTB	0.0124272
TMEM165	0.00189368										ACTB	0.0124272
ERC1	0.00189739										CLDND1	0.0124297
0	0.00189845										SNRPN /// SNURF	0.0124344
FAM111A	0.00189902										KIF5A	0.0124458
DNASE2B	0.00190138										MDH1	0.0124485
GIMAP8	0.0019014										H3F3A /// H3F3B /// MIR4738	0.0124517
GATA3-AS1	0.0019015										RPS20 /// SNORD54	0.0124521
RP1-202O8.3	0.00190198										SERPINI1	0.0124631
CTD-2033C11.1	0.00190306										RPS6	0.0124673
TMEM223	0.00190444										BEX1	0.0124713
ENPP1	0.00190499										SCD	0.0124813
ERBB2	0.00190692										RPL22	0.012487
KCNG2	0.00190721										DSTN	0.0124962
UGT1A1	0.00191084										CCNI	0.0124994
LOC100134445 /// LOC100288778 /// LOC100653296 /// WASH1 /// WASH2P /// WASH3P /// WASH5P /// WASH7P	0.00191276										GABARAPL1 /// GABARAPL3	0.0125106
CENPVP1 /// CENPVP2	0.00191372										CCNI	0.0125231
LZTS1	0.001915										HBB	0.0125383
LOC100506235	0.00191637										NME7	0.0125407
BC023201	0.00191672										RPS27A	0.0125438
RP11-245P10.8	0.00191999										USMG5	0.0125651
DNMT3A	0.00192206										TUBB3	0.0125657
KIAA1875	0.00192646										EDIL3	0.0125679
OTUD1	0.00192673										MIR6805 /// RPL28	0.012573
0	0.00192741										NDUFA4	0.0125758
LOC101928728	0.00192776										COX7C	0.0125773
0	0.00193184										QDPR	0.0125779
B3GALT6	0.00193214										GRIA2	0.0125779
P2RX2	0.00193363										NEFL	0.012584
TCF3	0.00193541										SOD1	0.012585
RNF213	0.00193774										GTF2I /// GTF2IP1 /// LOC100093631	0.0125889
0	0.00193784										RPS3	0.0126088
RBM14-RBM4 /// RBM4	0.00193884										PRKAR1A	0.0126092
CASZ1	0.00194121										MTURN	0.0126258
HOXD3 /// HOXD4 /// LOC401021	0.00194181										CALM1 /// CALM2 /// CALM3	0.0126279
AJAP1	0.00194187										RPS7	0.012644
NLRP1	0.00194378										PGAM1	0.0126529
AX747730	0.00194547										TUBB3	0.012657
0	0.00194633										C18orf32 /// RPL17 /// RPL17-C18orf32 /// SNORD58A /// SNORD58B /// SNORD58C	0.0126627
0	0.00194752										RPS8 /// SNORD38B /// SNORD55	0.0126668
HSD3B1	0.00194927										TUBB4B	0.0126763
0	0.00194963										NTRK2	0.0126835
ODF2L	0.00195155										RPSA /// RPSAP19 /// RPSAP58 /// RPSAP9 /// SNORA6 /// SNORA62	0.0126969
YME1L1	0.00195196										ATP5A1	0.0127045
LOC101929865 /// LOC101930243	0.00195259										MT1X	0.0127087
TM4SF5	0.00195332										MAP1A	0.0127101
CC2D2A	0.00195644										SLC1A3	0.0127214
CD8B	0.00195714										RPL15	0.012728
PRR5L	0.00195934										C18orf32 /// RPL17 /// RPL17-C18orf32 /// SNORD58A /// SNORD58B /// SNORD58C	0.0127338
FGFR1OP	0.0019598										GPM6B	0.0127356
TUG1	0.00196037										PRKACB	0.0127493
AC005606.14	0.001961										NRGN	0.0127566
BLK	0.00196166										MT1HL1	0.0127647
CTB-174D11.1	0.00196231										RPL13 /// SNORD68	0.0127656
0	0.00196457										DYNLL1	0.0127688
PREX2	0.00196493										DYNC1LI2	0.012788
PPM1N	0.00196574										RPL36A /// RPL36A-HNRNPH2	0.0127895
XXbac-B476C20.9	0.00196576										HBA1 /// HBA2	0.0127967
PDGFB	0.00196638										LAMP1	0.0127972
PLEKHH3	0.0019671										LDHB	0.0127993
GSC2	0.00197525										TMA7	0.0128015
0	0.00197693										RPL6	0.0128048
HAUS7 /// TREX2	0.00197729										SERINC1	0.0128067
0	0.00198003										MORF4L2	0.0128103
KRTDAP	0.00198021										HSP90AA1	0.012816
VPS8	0.00198123										HMGB1	0.0128233
S1PR5	0.00198169										LOC101929087 /// SUMO2 /// SUMO3	0.0128276
KIAA1432	0.00198194										HBA1 /// HBA2	0.0128284
0	0.00198214										RPLP2 /// SNORA52	0.0128329
KRT36	0.00198227										TF	0.0128373
BCDIN3D-AS1	0.00198247										RPL4 /// SNORD16 /// SNORD18A /// SNORD18B /// SNORD18C	0.0128468
CSNK1G3	0.00198288										HBB	0.0128562
ATOH1	0.00198318										PTMA	0.0128612
0	0.00198329										JUND	0.0128631
RP13-20L14.1	0.00198359										AHCYL1	0.0128646
0	0.00198676										ACTB /// ACTG1	0.0128719
SSFA2	0.00198682										VSNL1	0.0128734
0	0.00198813										CFL1	0.012874
0	0.00199107										MT1X	0.0128866
ZNF771	0.00199124										C4orf46 /// TOMM7	0.0128954
TBX5-AS1	0.00199199										GAPDH	0.0128989
0	0.00199236										GAPDH	0.0128989
0	0.00199401										NGRN	0.0129026
HIST1H2BO	0.00199552										HMGB1	0.0129054
RP11-505K9.4	0.00199688										PPP2CB	0.0129125
LOC441242	0.00199766										B2M	0.0129301
0	0.00199846										TSC22D1	0.0129316
ZNF672	0.00199881										PLEKHB1	0.0129326
MROH1	0.00199944										HSP90AB1	0.0129421
SMPDL3B	0.00199984										FBXL16	0.0129449
NFE2	0.00200015										COX6C	0.0129585
ODF3L1	0.00200152										FTL	0.0129668
TRIO	0.00200481										RAC1	0.0129747
0	0.00200527										C18orf32 /// RPL17 /// RPL17-C18orf32 /// SNORD58A /// SNORD58B /// SNORD58C	0.01298
0	0.00200712										RPS21	0.0129839
CDK6	0.00200733										HSPA8 /// SNORD14C /// SNORD14D	0.0129856
PCBP1-AS1	0.00200968										CRYAB	0.0130052
0	0.00200972										SPTBN1	0.0130182
EPHA4	0.00201042										CAMK2N1	0.0130203
TMEM229B	0.00201093										RPS12	0.0130245
ALPI	0.0020121										RTN4	0.0130282
CFTR	0.00201398										RTN3	0.0130362
PROSC	0.00201411										RPL10A	0.0130475
MC3R	0.00201477										RPS14	0.0130516
0	0.00201615										CALM1 /// CALM2 /// CALM3	0.0130537
MLLT4	0.00201717										ATP1A2	0.0130558
0	0.00201877										SKP1	0.0130562
0	0.00201883										YWHAE	0.0130593
EPB41L1	0.00201997										ATP1B1	0.0130643
MNX1-AS1	0.00202002										YWHAG	0.0130847
ARFGAP2	0.00202035										APOD	0.0130892
CLIC6	0.00202038										RPS25	0.013093
PM20D1	0.00202097										UQCRB	0.0130983
FBXO2	0.00202115										MORF4L1	0.0131106
KDSR	0.00202306										RPL14	0.0131176
CTLA4	0.00202345										PEA15	0.0131304
TNFRSF18	0.00202427										QKI	0.0131323
ABHD16B	0.00202461										HNRNPA1 /// HNRNPA1L2 /// HNRNPA1P10 /// HNRNPA1P33	0.0131352
TRIB1	0.00202564										ALDOA	0.0131457
RORA	0.00202672										ALDOA	0.0131493
CLDN18	0.00202744										RPS6	0.0131684
0	0.00202765										HBA1 /// HBA2	0.0131686
SLC13A1	0.0020283										CALM1 /// CALM2 /// CALM3	0.0131724
MCL1	0.00202868										HBA1 /// HBA2	0.0131792
HIST1H3F	0.0020291										RPS4X	0.0131825
CHRNB4	0.0020299										0	0.0131854
ADRA1B	0.00203001										0	0.0131854
LINC00933	0.00203016										RPL27	0.0131965
ARHGEF12	0.00203018										HNRNPA1 /// HNRNPA1P10	0.0132047
GUCY2D	0.00203161										EIF1	0.0132117
0	0.00203173										PSAP	0.013217
CD44	0.00203309										LINC00657	0.0132263
CLRN3	0.00203323										RPS17	0.0132306
0	0.00203328										RPS3A /// SNORD73A	0.0132393
EVX1	0.00203494										GAPDH	0.013248
SGPL1	0.00203647										GAPDH	0.013248
VMO1	0.00203735										AQP4	0.0132772
SOCS1	0.00203834										RPL5 /// SNORD21	0.013281
MIR663AHG	0.00203996										RPL13 /// SNORD68	0.013284
0	0.00204295										RPL4 /// SNORD16 /// SNORD18A /// SNORD18B /// SNORD18C	0.0132882
INSL6	0.00204334										HSPA8 /// SNORD14C /// SNORD14D	0.0132883
CASR	0.00204354										GJA1	0.013289
CENPU	0.0020441										OAZ1	0.0132908
RIPK4	0.00204446										SRP14	0.0132911
SOST	0.0020457										RPS15	0.013292
ZNF425	0.00204661										RPL30	0.0133061
LINC00521	0.00204757										CHN1	0.0133105
FW339973	0.00204805										B2M	0.0133322
NDUFA2	0.00204885										IDS	0.0133364
0	0.00204891										GPM6A	0.0133408
0	0.00204891										RNU86 /// RPL3 /// SNORD83B	0.013341
0	0.00204929										RPS17	0.0133435
AC006129.2	0.00204935										RTN4	0.0133521
HIC1	0.00204951										RPS28	0.0133594
DNASE1	0.00204965										PRNP	0.0133765
AL110181 /// RP11-390E23.6	0.0020501										KIF5C	0.013385
FGF8	0.0020502										CALM1 /// CALM2 /// CALM3	0.0133872
JUND	0.00205027										RPL13A /// RPL13AP5 /// SNORD32A /// SNORD33 /// SNORD34 /// SNORD35A	0.0133908
C11orf95	0.00205127										CALM1 /// CALM2 /// CALM3	0.0134294
0	0.00205149										TMSB10	0.0134331
PPP1R3C	0.00205159										ACTB /// ACTG1	0.0134412
MFSD9	0.00205165										MATR3 /// SNHG4	0.013442
MXD1	0.00205249										YWHAQ	0.013442
HIST1H2BA	0.00205274										COX6A1	0.0134525
MYCN	0.00205322										RNU86 /// RPL3 /// SNORD83B	0.0134563
AK131021	0.00205335										ACTB /// ACTG1	0.0134563
0	0.00205424										RPL24	0.0134601
NEBL-AS1	0.00205448										RPS6	0.0134617
CAMSAP1	0.00205469										MAP1B	0.0134648
PNPLA7	0.00205584										EIF4A2 /// MIR1248 /// SNORA4 /// SNORA63 /// SNORA81 /// SNORD2	0.0134686
IDUA	0.0020566										RPL32	0.0134699
HOXB8	0.00205677										EIF1	0.0134823
HTN3	0.00205736										NACA	0.0134903
H19 /// MIR675	0.00205792										RPS4X	0.0135199
CYTH3	0.00205899										DKK3	0.0135253
PCDHGB8P	0.00205939										NACA	0.0135273
PCP2	0.00205987										ATP1B1	0.0135438
KLF12	0.00206024										GNAS	0.0135438
RP11-402D21.2	0.00206047										LDHB	0.0135566
CPSF3L	0.00206054										RPL7	0.0135612
RXFP3	0.00206066										EIF1	0.0135616
0	0.00206125										RPS16	0.0135669
SMIM13	0.00206125										EIF1	0.0135804
0	0.00206188										HSP90AA1	0.0135814
LINC01215	0.00206299										MAP2	0.0135896
0	0.00206325										BASP1	0.0136092
RFX1	0.00206435										RPLP1	0.01362
0	0.00206451										RPL39	0.0136256
0	0.00206451										RPL38	0.0136338
0	0.00206545										GPM6A	0.0136619
DDX28	0.00206555										RPS29	0.0136688
OBSCN	0.00206599										ACTB /// ACTG1	0.0136693
GSN	0.00206714										ACTB /// ACTG1	0.0136748
ATP11A	0.00206897										HSPA8 /// SNORD14C /// SNORD14D	0.0136775
0	0.00206955										MRFAP1	0.0136799
RGMA	0.00206967										ACTB /// ACTG1	0.0136893
KIF13A	0.00207141										ACTB /// ACTG1	0.0136929
FGF3	0.00207162										PEBP1	0.013694
0	0.00207182										RPL9	0.0137003
CCDC40	0.00207208										MAP1B	0.013702
0	0.00207217										RPL21 /// RPL21P28 /// SNORA27 /// SNORD102	0.0137063
GALR2	0.0020728										RPS11 /// SNORD35B	0.0137084
GFI1B	0.0020731										RPS18	0.0137089
LOC101929036 /// PAH	0.00207356										GNAS	0.01371
RP1-100J12.1	0.00207369										RPS3A /// SNORD73A	0.0137809
OR6B1	0.00207388										PTGDS	0.0137937
FOXC2	0.00207416										NGFRAP1	0.0137987
0	0.00207476										TUBB2A	0.0138029
FOXE1	0.0020748										MBP	0.0138077
0	0.00207561										RPS20 /// SNORD54	0.013809
FEZF2	0.00207563										ACTB /// ACTG1	0.0138099
AMN	0.00207572										RPS17	0.0138161
CASP16	0.00207648										DPYSL2	0.0138181
SYCP2L	0.00207794										RPS10	0.0138255
LOC100506299	0.002078										PPIA	0.0138328
LRRC59	0.002078										RTN1	0.0138552
SLC6A6	0.00207816										GPM6B	0.0138749
0	0.00207826										FTH1P5	0.0138762
0	0.00207843										RPL13A /// RPL13AP5 /// SNORD32A /// SNORD33 /// SNORD34 /// SNORD35A	0.0139089
EIF5B	0.00207895										SNAP25	0.0139206
SIPA1L3	0.00207956										RPS27	0.0139291
0	0.00208028										LOC101060363 /// PPIA	0.0139376
0	0.00208063										UBC	0.0139394
0	0.0020807										TUBA1A	0.0139532
0	0.00208092										LOC101060363 /// PPIA	0.0139645
CLCN5	0.00208115										RPS10	0.0139702
ST8SIA2	0.00208137										RPL27A /// SNORA45A	0.0139805
0	0.00208156										RPS10	0.0140118
ZNF672	0.00208157										RPL37	0.0140156
OR51M1	0.00208278										RPL4 /// SNORD16 /// SNORD18A /// SNORD18B /// SNORD18C	0.0140364
CKAP4	0.00208479										RTN4	0.0140607
CAMK2D	0.00208505										RPS24	0.0140631
AIM1L	0.00208537										GAPDH	0.0140685
0	0.00208545										MT2A	0.0140768
CATSPERD	0.00208562										GNAS	0.0140774
FAM187B	0.00208646										RPS3A /// SNORD73A	0.0140959
ZFP64	0.00208664										GNAS	0.0140984
C14orf105	0.00208915										GAPDH	0.014103
SMUG1	0.00208928										RPL34	0.014109
0	0.00208997										LOC101928826 /// TPT1	0.0141092
0	0.00209004										GNAS	0.0141156
0	0.00209045										PLP1	0.0141482
RP11-333I13.1	0.00209089										SLC1A2	0.0141568
HMCN1	0.00209203										RPL31	0.0141611
NDE1	0.00209247										ACTB /// ACTG1	0.0141763
RNASE1	0.00209249										TUBA1B	0.0141845
RP11-196G18.23	0.00209363										RNU86 /// RPL3 /// SNORD83B	0.0141987
RP11-676J12.4	0.00209422										RPL7	0.0142049
LINC00610	0.00209441										TUBA1C	0.0142058
0	0.0020947										FTL	0.0142384
0	0.00209519										GLUL	0.0142451
HS6ST1	0.00209522										TUBA1B	0.0142673
NCF1 /// NCF1B /// NCF1C	0.00209541										RPL23A	0.0143033
0	0.00209592										TUBA1C	0.0143047
UGT3A1	0.00209612										TUBA1B	0.0143085
PPOX	0.00209627										RPL13A /// RPL13AP5 /// SNORD32A /// SNORD33 /// SNORD34 /// SNORD35A	0.0143272
SCIMP	0.00209761										0	0.0143323
0	0.00209795										0	0.0143323
0	0.00209923										CALM1 /// CALM2 /// CALM3	0.0143377
AANAT	0.0020994										RPS23	0.0143614
TCF21	0.00209986										LOC101060363 /// PPIA	0.0143675
0	0.00210209										LOC101928826 /// TPT1	0.0143696
0	0.00210212										TUBA1B	0.0143718
0	0.00210217										TUBA1B	0.0143943
VMA21	0.00210358										UBB	0.014399
0	0.00210368										HUWE1	0.01441
0	0.00210418										LOC101928826 /// TPT1	0.0144162
GRHL3	0.00210432										TMSB4X	0.0144181
0	0.00210439										PTPRO	0.0144231
0	0.00210521										PTGDS	0.0144544
RANBP9	0.00210544										FTH1	0.0144644
GPR61	0.0021065										GAPDH	0.0145411
GPR98	0.00210657										GAPDH	0.0145411
C6orf118	0.00210695										LOC101060363 /// PPIA	0.0145419
GMDS	0.00210728										GPM6B	0.0145836
0	0.00210738										0	0.0146269
0	0.00210764										FAM107A	0.0146299
0	0.00210768										RPL23A /// SNORD42A	0.0146821
ZADH2	0.00210831										HSP90AA1	0.0146909
0	0.00210833										EEF1A1	0.014714
0	0.00210858										ACTB	0.0147338
CATX-1	0.00211095										ACTB	0.0147338
KMT2A	0.00211206										0	0.0147712
0	0.00211293										0	0.0147712
NDUFA10	0.00211349										UBC	0.0147876
0	0.00211431										RPL23A /// SNORD42A	0.0148329
AKIRIN2	0.00211441										RPL23A /// SNORD42A	0.0148345
SPRR1A	0.00211636										CLU	0.0148431
0	0.00211652										MBP	0.0148475
DNAJC21	0.0021168										RPL41	0.0148579
0	0.00211752										GFAP	0.0148803
SKIL	0.00211788										EEF1A1	0.0149115
CCDC71L	0.00211805										SPARCL1	0.0149379
C8G	0.00211819										LOC101928826 /// TPT1	0.014953
MAP3K6	0.00211853										EEF1A1	0.0149542
BCL2L15	0.00211934										0	0.0149827
0	0.00211943										0	0.0149827
PML	0.0021204										CLU	0.0149989
ARHGAP18	0.00212086										LOC101928826 /// TPT1	0.0150925
SOX4	0.00212093										0	0.0151297
0	0.00212115										0	0.0151297
C9orf57	0.00212142										GAPDH	0.0151624
0	0.00212191										0	0.0151636
ERBB2	0.0021225										0	0.0151636
0	0.00212306										ACTB	0.0151698
CDC20B	0.00212307										0	0.0152066
0	0.00212342										0	0.0152066
LRRFIP2	0.00212351										RPL37A	0.015294
SERPINB6	0.0021236										ACTB	0.0154254
PAPPA	0.00212382										EEF1A1	0.0155019
0	0.00212436										ACTB	0.0155076
HOXD-AS2	0.00212472										0	0.0155754
0	0.00212477										0	0.0155754
0	0.00212485										0	0.0156107
HAND2-AS1	0.00212519										0	0.0156107
0	0.00212556										ND4	0.016138
0	0.00212604										ND4	0.0161993
ZAN	0.0021261
TCRA /// TCRVA13 /// TRAV22 /// TRAV22	0.00212642
SLC7A4	0.00212647
FOXD3	0.00212661
0	0.00212661
SLC17A3	0.00212769
OR51B5	0.00212775
FAM171B	0.00212821
SNTB2	0.00212908
ZNF865	0.00212915
RRBP1	0.00212922
0	0.00212964
KRTAP9-4	0.00212971
INTS3	0.0021298
LOC100130476	0.0021305
LMCD1	0.0021306
0	0.00213211
ANPEP	0.00213269
ZNF777	0.00213272
HBQ1	0.0021331
0	0.00213318
CDT1	0.00213444
0	0.00213472
EBF3	0.00213516
FLJ37453	0.00213585
CD36	0.00213615
DCAF8	0.00213649
SPRED2	0.00213659
0	0.00213742
WISP1	0.00213865
RP11-131L23.2	0.00213866
0	0.00213885
SOBP	0.00213891
0	0.00213909
CALD1	0.00214025
MLNR	0.00214036
0	0.00214067
COX4I1	0.00214083
DEFB127	0.00214177
LHX5	0.00214222
OLAH	0.00214247
USP42	0.00214273
FSIP2	0.00214283
C17orf70	0.00214362
DPYSL3	0.00214489
SLC19A1	0.00214573
ZC3H10	0.0021464
0	0.00214795
PSPC1	0.00214856
0	0.0021487
0	0.00214909
0	0.00214949
CACNG4	0.00214964
KLF13	0.0021507
0	0.00215145
CASP14	0.00215167
LINC00313	0.00215213
DCP2	0.00215262
TNFRSF19	0.00215264
DEFB123	0.00215267
DLX6	0.00215282
ARHGEF34P /// OR2A4 /// OR2A7	0.00215396
ERICH1	0.00215419
0	0.00215572
HIST1H3A /// HIST1H3B /// HIST1H3C /// HIST1H3D /// HIST1H3E /// HIST1H3F /// HIST1H3G /// HIST1H3H /// HIST1H3I /// HIST1H3J	0.00215584
LOC401463	0.00215603
MEOX2	0.00215641
LBX1	0.00215644
ARHGAP26	0.00215658
CRYGA	0.0021567
TRADD	0.00215683
HKDC1	0.00215715
CROCCP3	0.00215755
0	0.00215761
HTN1	0.00215761
MZB1	0.00215773
0	0.00215775
0	0.00215801
CFL1	0.00215811
CPT1A	0.00215846
RAD51D	0.00215898
TKTL2	0.00215948
EPPK1	0.00215992
CELF4	0.00216004
LOC101927699	0.00216064
SIX1	0.00216104
GALR3	0.00216108
LOC101929335	0.00216247
0	0.00216249
LOC101928554	0.00216279
CD4	0.0021628
RP11-692P14.1	0.00216283
0	0.00216297
DYNC1H1	0.00216314
KIAA1467	0.00216384
AP1M2	0.00216435
HOXC9	0.00216438
SEC14L3	0.00216458
CGN	0.00216472
GAGE12B /// GAGE12F /// GAGE12G /// GAGE12I /// GAGE4 /// GAGE5 /// GAGE6 /// GAGE7	0.00216515
RP11-567C2.1	0.0021653
MTHFSD	0.00216583
LOC102724587	0.0021668
LAMA1	0.00216719
NRK	0.00216741
LOC101928790	0.00216877
KRT7	0.00216899
ROCK1	0.00216931
WNT4	0.0021694
MS4A8	0.00216954
0	0.00216957
ZNF821	0.00216974
AF067845.1	0.00216983
CYP26B1	0.00217011
FARP1	0.00217013
MBNL3	0.00217031
DESI2	0.00217074
ARHGEF39	0.00217096
POLH	0.00217097
CENPN	0.00217199
PHLDA2	0.00217218
HOXA10-AS /// MIR196B	0.0021722
ZBED2	0.00217221
MTFR1	0.00217237
0	0.00217275
0	0.00217286
0	0.0021731
ZDHHC21	0.0021736
NFKBID	0.00217368
0	0.00217376
RHOA	0.00217429
PIGM	0.00217448
AC005754.7 /// BC016751	0.00217511
0	0.00217577
0	0.00217586
CEP83	0.00217591
SPZ1	0.00217598
LOC101927086	0.00217677
0	0.00217751
KHDC3L	0.00217769
0	0.0021783
AC007362.3	0.00217855
RP11-567I13.1	0.00217861
0	0.00218064
EDA	0.0021809
LOC101927499	0.00218156
LOC646626	0.00218213
0	0.00218222
ISM1	0.00218229
LOC100505817	0.00218278
TSPAN32	0.00218302
0	0.00218348
0	0.00218348
GART	0.00218349
RP11-998D10.7	0.00218399
PHTF2	0.00218465
ACPP	0.00218514
0	0.00218552
0	0.00218574
BNC2	0.00218619
CRYBA2	0.00218645
DIAPH3	0.00218661
MKX	0.00218671
LOC101927417	0.00218673
0	0.00218711
0	0.00218717
RP11-554J4.1	0.00218745
DOT1L	0.00218765
COL27A1	0.00218778
CTD-2287O16.5	0.0021879
HS3ST6	0.00218797
JMJD4	0.00218858
CABP7	0.00218873
0	0.00218881
0	0.00218881
TNRC18	0.00218904
ELL2	0.00218925
PANX2	0.00218978
0	0.00219
CRYAA	0.00219057
0	0.00219163
0	0.00219239
C1QL1	0.00219248
0	0.00219257
MTAP	0.00219313
ZNF777	0.00219335
0	0.00219351
SLC25A15	0.00219371
0	0.0021941
RP11-292D4.3	0.00219487
PTGDR	0.00219517
HIST1H3A	0.00219521
0	0.00219529
0	0.00219588
ARHGEF12	0.00219617
LOC653160	0.00219677
ESD	0.00219679
0	0.00219734
FENDRR	0.00219739
0	0.0021977
0	0.00219776
AC078883.3 /// AC078883.4	0.00219804
ZNF83	0.00219808
CYP4F22	0.00219816
GLUD2	0.00219819
FLJ42351 /// LOC101930279	0.00219881
WWC2	0.0021989
SLC28A1	0.00219893
0	0.00219908
0	0.00219926
TP53AIP1	0.00219939
KCNK4	0.00219946
MAGIX	0.00219995
GDF15	0.00220026
0	0.00220038
RP11-654A16.3	0.00220086
FMO3	0.00220107
SAP30L	0.00220108
0	0.00220126
CEP95	0.00220128
CPA6	0.00220152
0	0.00220163
CELF4	0.00220209
HSPB7	0.00220266
ZC3H3	0.00220269
UBL7-AS1	0.00220327
ANO2	0.00220328
FCRL5	0.0022043
NUP50	0.00220441
ZIC1	0.00220474
NHP2L1	0.00220501
SOX4	0.00220543
KAL1	0.00220612
0	0.00220793
0	0.00220804
0	0.00220807
ARHGAP27	0.00220843
0	0.00220862
RP11-382F24.1 /// RP11-382F24.2	0.00220912
SPATA22	0.0022095
CLDN3	0.00220962
PLXNA4	0.00220973
TMCO3	0.00220996
LOC101929777 /// WNT3	0.00221006
0	0.00221019
PARL	0.00221047
FXYD4	0.00221064
PADI1	0.00221077
FZD10-AS1	0.0022108
SNX25	0.00221085
PYY	0.00221092
0	0.00221129
SUV39H2	0.0022113
SLC2A2	0.00221218
IGHD	0.00221268
GCSAM	0.00221269
LRRC2-AS1	0.00221288
NPAS4	0.00221397
COL6A1	0.00221398
LIPH	0.00221418
MYNN	0.00221456
0	0.00221505
PANK2	0.00221529
0	0.00221561
MEX3D	0.00221574
SLC38A10	0.00221625
B4GALNT4	0.00221679
IMPAD1	0.00221698
FBXL8	0.00221725
BVES	0.00221768
PSPC1	0.00221831
0	0.00221841
RAB30-AS1	0.00221872
0	0.0022192
SLC45A2	0.00221968
0	0.00221993
RP11-489E7.4	0.00222005
CABS1	0.00222006
TRDMT1	0.00222007
MIDN	0.00222007
0	0.00222014
ZNHIT2	0.00222017
COX8C	0.00222095
NKX6-2	0.00222121
AQPEP	0.00222162
SUFU	0.00222224
RP13-270P17.3	0.00222254
CACNA1D	0.00222313
MS4A1	0.00222343
CTAG1A /// CTAG1B	0.00222351
CTB-31O20.9	0.00222355
GLP2R	0.00222374
0	0.00222376
0	0.00222415
ERLEC1	0.00222442
SPTBN1	0.00222457
0	0.00222471
FOXK1	0.00222484
VASH2	0.00222491
0	0.00222531
0	0.00222535
0	0.00222578
RNASE11	0.00222636
TCR-alpha /// TRAV12-3 /// TRAV12-3 /// YME1L1	0.00222649
LCAT	0.00222677
PRSS8	0.00222711
RRS1-AS1	0.00222715
RASGRP3	0.00222736
0	0.00222784
DDC	0.00222831
0	0.00222844
TRA2A	0.00222846
RP11-728F11.4	0.00222896
SRMS	0.00222919
0	0.00222919
HIST3H2A	0.0022298
0	0.00223038
TMEM173	0.00223073
LINC01360	0.00223075
ABTB2	0.0022309
MEX3D	0.00223098
BLOC1S5 /// EEF1E1-BLOC1S5	0.00223099
FLII /// LLGL1	0.00223123
ARL17A /// ARL17B /// LOC100294341	0.00223139
0	0.00223161
RAB25	0.00223163
ARL4C	0.00223169
LOC100507642	0.00223194
KLF12	0.00223209
0	0.00223228
WHAMMP2 /// WHAMMP3	0.0022325
HRH4	0.00223252
HIST1H2BC /// HIST1H2BE /// HIST1H2BF /// HIST1H2BG /// HIST1H2BI	0.00223261
0	0.00223269
MIR612 /// NEAT1	0.00223281
SEC24A	0.00223303
DAGLB	0.00223324
NAA30	0.00223417
ACTL9	0.00223427
OR2B3	0.00223453
0	0.00223472
GMIP	0.00223517
LOC101926906	0.0022354
STAMBPL1	0.00223559
LOC100506457	0.00223575
0	0.00223576
EEPD1	0.00223595
CYP2R1	0.00223598
PLEKHH2	0.00223598
0	0.00223664
0	0.00223682
GJC2	0.00223713
0	0.00223716
ST8SIA2	0.00223759
0	0.00223762
SP8	0.00223766
0	0.00223784
PDZK1	0.00223792
CLPTM1L	0.00223852
MTBP	0.00223879
ITLN1	0.00223883
0	0.00223904
RPS14	0.00223949
SERPINC1	0.0022399
TTC7A	0.00224002
VSTM1	0.0022405
0	0.0022406
0	0.00224068
0	0.00224075
TMEM87A	0.00224076
ANPEP	0.00224081
0	0.00224111
INF2	0.00224138
DNAJC21	0.00224174
EPPK1	0.00224176
ASCL5	0.00224209
CYP3A4	0.00224209
DNAH1	0.00224234
0	0.00224288
TAF7L	0.00224319
0	0.00224339
ENDOV	0.00224357
FAM230C	0.00224392
RHOB	0.00224408
AGAP1	0.00224415
GTSE1	0.00224456
LINC00710	0.00224482
0	0.00224526
GLS	0.00224552
LOC101929034	0.00224552
KIAA0408 /// SOGA3	0.00224559
TRPM1	0.00224627
FST	0.00224637
MCM3AP	0.00224662
WDR38	0.00224759
STOM	0.0022478
KIDINS220	0.00224783
RP11-55K13.1	0.00224817
SMLR1	0.00224825
LMO7	0.00224835
WDR19	0.0022484
CLDN12 /// LOC102723899	0.00224866
0	0.00224904
FBRSL1	0.00224906
ABCC6 /// LOC101930322	0.00224919
PCDHGC3 /// PCDHGC5	0.00224932
PXN-AS1	0.00225014
CDH20	0.00225059
AREL1	0.0022507
GFRA4	0.00225073
0	0.0022509
KRT84	0.00225135
TNFRSF4	0.00225169
LMTK2	0.00225235
0	0.00225253
LOC220077	0.0022535
0	0.00225383
FOXD2-AS1	0.00225416
0	0.00225422
HIST3H3	0.00225439
TRA /// TRAV16 /// TRAV16 /// YME1L1	0.00225458
ING5	0.0022546
ATP2B2	0.00225483
FBXL12	0.00225515
ADI1	0.00225611
0	0.00225616
DPP9	0.00225664
EFCAB4B	0.00225674
0	0.0022569
0	0.00225708
0	0.00225712
SEPT6	0.00225716
0	0.00225718
TRIM4	0.00225764
MYCN	0.00225771
ADAMTS9-AS2	0.00225774
LOC149351	0.00225786
SOX1	0.00225792
EML3	0.00225967
NPC1L1	0.0022597
LOC100653005	0.00226001
KDM3A	0.00226056
DKFZP434L187 /// DKFZP434L187	0.00226093
0	0.00226104
0	0.0022611
HDGFRP3	0.00226156
BAIAP2L2	0.00226165
0	0.0022617
0	0.00226193
GUSBP5	0.00226217
SKIL	0.00226259
PHF7	0.00226288
CLCN4	0.00226375
LINC00293	0.00226389
CLCA2	0.00226392
0	0.00226418
LOC101928259	0.00226432
KLHL34	0.0022648
0	0.00226487
0	0.00226538
IGHG1	0.00226567
FN3K	0.00226578
GSDMB	0.00226588
0	0.00226607
LOC102725408	0.00226608
LAMA4	0.00226609
EPPK1	0.00226615
PIP5K1B	0.00226616
COL6A6	0.00226642
0	0.00226645
SERPINB9	0.00226652
ZDHHC1	0.00226655
0	0.00226662
0	0.00226676
LINC00518	0.00226689
HPDL	0.00226696
OR2F2	0.0022671
ASB4	0.00226718
0	0.00226722
RP11-116O18.1	0.00226739
KRTAP4-3	0.00226744
ZNF497	0.00226753
EXOC3L4	0.00226768
0	0.002268
RP3-497J21.1	0.0022687
NFRKB	0.00226884
ASPM	0.00226928
HS2ST1	0.00226969
LINC01207	0.00226975
0	0.00227039
ZNF219	0.00227078
IGF2BP1	0.00227104
HOXD10	0.00227116
RARRES1	0.00227126
DPF3	0.00227198
MTNR1A	0.00227223
GCGR	0.00227252
RPLP1	0.00227269
TRIM55	0.00227275
CSTL1	0.00227357
ZNF829	0.00227358
A1BG	0.00227362
CBLC	0.00227389
WRAP73	0.00227402
TIGIT	0.00227457
LINC00608	0.00227458
AICDA	0.00227464
TEX43	0.00227475
0	0.00227497
TMED6	0.002275
REPIN1	0.00227586
BSPRY	0.00227593
0	0.00227619
0	0.00227629
TBX5	0.00227639
RP11-506N2.1	0.00227656
LOC101929464	0.00227668
0	0.00227673
ABCC9	0.00227702
0	0.00227718
LINC00113	0.00227735
EQTN	0.00227799
P4HA1	0.00227827
0	0.00227838
0	0.00227932
KCNE1	0.00227949
REG4	0.00227958
0	0.00227967
0	0.00227967
0	0.0022804
FPR2	0.00228139
TRMT10A	0.00228161
SSX4 /// SSX4B	0.00228168
0	0.00228171
TRBV27	0.0022824
GALK1	0.00228249
GAGE12B /// GAGE12C /// GAGE12D /// GAGE12E /// GAGE12F /// GAGE12G /// GAGE12H /// GAGE12I /// GAGE2A /// GAGE2C /// GAGE4 /// GAGE5 /// GAGE6 /// GAGE7	0.00228267
0	0.00228288
ATP11A	0.00228317
0	0.00228373
PAX3	0.00228374
KCNK7	0.00228377
MBD2	0.00228435
0	0.00228436
KRTAP3-3	0.00228455
PES1	0.00228465
RGMB	0.00228494
VPRBP	0.00228522
PPP2R2A	0.00228524
DOCK6	0.00228527
0	0.00228566
0	0.00228598
HOXA-AS3	0.00228603
RP5-1154L15.2	0.00228603
LY6G6D /// LY6G6F	0.00228604
DNM3OS	0.00228649
0	0.0022872
0	0.00228723
0	0.00228766
LOC100130744	0.00228804
NPHP4	0.00228811
0	0.00228845
TEKT3	0.00228857
TTTY12	0.00228864
ZNF775	0.00228897
0	0.00228915
TSC22D3	0.00228917
0	0.00228946
LOC101929315	0.00228946
UBR4	0.00228957
CMTM6	0.00228964
C15orf48	0.00228984
CCDC74A /// CCDC74B	0.00229015
RP11-661A12.9	0.00229015
0	0.00229025
IFNA5	0.00229082
POLDIP3	0.00229084
BC127192 /// SHANK2	0.00229098
BC034578 /// RP11-411B10.2	0.00229098
DCDC2	0.002291
BUB3	0.00229118
BCL2L14	0.00229125
AVPR2	0.00229144
PPY2	0.00229205
LINC00545	0.00229214
0	0.00229231
MCMBP	0.00229289
KALP /// KALP	0.00229319
NAV2-AS2	0.00229327
PRO1483	0.00229346
0	0.00229369
MRPS15	0.00229412
ZNF710	0.00229422
RP11-436D10.3	0.00229446
HBM	0.00229483
MGC12916	0.00229483
0	0.0022956
MCF2L	0.00229563
PUM2	0.00229573
ADAMTS15	0.00229575
PITX1	0.00229581
0	0.00229583
0	0.00229588
0	0.00229596
CATX-1	0.00229621
SAV1	0.00229664
0	0.00229691
SDK1	0.00229691
NPPC	0.00229694
RPF1	0.00229721
ESR1	0.00229761
TRIM55	0.00229766
0	0.00229775
MUC15	0.00229783
CDH16	0.00229818
0	0.00229818
TEPP	0.00229839
0	0.00229857
REXO2	0.00229885
0	0.00229939
TTC39A	0.00229966
0	0.00229981
PRKCH	0.00229991
0	0.00230007
0	0.00230009
0	0.00230024
TFPI2	0.00230026
SHH	0.00230027
HIST1H4PS1 /// HIST1H4PS1	0.0023003
TPCN2	0.00230096
0	0.002301
0	0.00230154
SDAD1	0.00230172
JARID2	0.00230197
DCN	0.00230205
0	0.00230273
FMNL2	0.00230289
MPZL3	0.00230354
PRDM8	0.00230388
FLJ37453	0.00230415
0	0.0023046
SPG20	0.00230485
CLDN18	0.00230498
MUC4	0.00230509
DOK7 /// LOC102724043	0.00230529
POLR1A	0.00230534
FOXO1	0.0023056
GATA4	0.00230582
EPB41L5	0.00230599
LINC01233	0.00230601
CCR9	0.00230616
WDR59	0.00230624
RHD	0.00230641
CAPN6	0.00230649
0	0.00230656
STK33	0.0023067
PMCHL2	0.00230816
0	0.00230831
PCCA	0.00230837
0	0.00230914
0	0.00230937
SLC25A37	0.00230962
DCTN5	0.00230968
0	0.00230992
CHRNB3	0.00230996
ABCF2	0.00231024
0	0.00231027
ZFP1	0.00231027
AP001062.7 /// C21orf2	0.00231036
KIAA2026	0.00231053
RP11-347D21.1	0.00231067
UNC80	0.0023107
0	0.00231106
IKZF3	0.00231128
GS1-304P7.2	0.0023114
0	0.00231179
SPATA17	0.0023119
LOC101926943	0.00231196
LINC00458	0.00231198
IGF2BP1	0.00231201
SPATA9	0.00231212
0	0.00231225
0	0.00231232
TRPC6	0.0023125
LOC100507468	0.00231271
NR2F6	0.00231299
0	0.00231312
ZBTB11-AS1	0.00231322
MGC24103	0.00231326
CLDN23	0.00231335
HGSNAT	0.00231354
PRG3	0.00231388
GPR135	0.00231392
FOXN3	0.00231394
0	0.00231418
SIKE1	0.00231431
ARHGAP28	0.00231439
0	0.00231505
RALGAPA2	0.00231526
MIR5188	0.00231553
VSTM4	0.00231564
PSORS1C3	0.00231597
0	0.00231605
0	0.00231608
0	0.00231629
MLXIP	0.00231629
PRR23D1 /// PRR23D2	0.00231629
HOXD8	0.00231686
YBX3	0.00231701
MOGAT3	0.00231714
DIRAS1	0.00231736
SMARCA2	0.00231747
SEL1L3	0.00231749
RARB	0.00231769
H2BFXP	0.00231778
LOC100130642	0.00231784
0	0.00231804
ZNF347	0.0023181
RPS8	0.00231811
ITIH4	0.00231823
0	0.00231824
OSR1	0.00231827
0	0.00231856
0	0.0023187
0	0.00231882
0	0.00231882
USP49	0.00231887
OSBPL8	0.00231896
0	0.00231907
RPS14	0.00231915
TEX33	0.00231939
SFMBT2	0.00231951
SUFU	0.00231965
ATP1B4	0.00231982
HCFC1	0.00231993
FMO3	0.00231995
C17orf59	0.00232003
RP11-305L7.3	0.00232012
RP1-192P9.1	0.00232032
STX11	0.00232034
ZBTB7C	0.00232041
WNT6	0.00232054
0	0.00232098
SRSF3	0.00232114
ZNF771	0.00232123
ARSB	0.00232165
0	0.0023218
0	0.00232187
RP11-456P18.2	0.00232281
SLC41A2	0.00232287
LOC100134040	0.00232324
RFX3	0.00232346
RP11-443B7.1	0.00232354
TTLL2	0.00232354
AFP	0.00232365
ZBTB20	0.00232414
SLC16A10	0.00232426
LOC100240734	0.00232436
EBF2	0.00232487
0	0.00232494
CTAG2	0.00232533
OVOL1	0.00232541
CCDC120	0.00232543
PARD3-AS1	0.00232548
CYP2F1	0.00232612
CATSPERG	0.00232631
MAP2K5	0.00232634
RPA4	0.00232676
ARHGAP1	0.0023268
0	0.00232683
ZNF818P	0.00232694
CARS	0.00232729
PRLR	0.00232737
0	0.00232757
TMEM107	0.00232797
ROPN1L	0.00232821
BNC2	0.00232854
CHDH	0.0023286
AC007364.1 /// FLJ32955	0.00232864
B3GNT7	0.00232873
IL4I1	0.00232876
ACTA2 /// ACTA2	0.00232889
0	0.00232924
ETNK1	0.00232934
FBXO4	0.00232949
IL1RN	0.00233031
0	0.00233047
0	0.00233053
LOC441052	0.00233062
0	0.00233072
SGPP2	0.00233085
GDF15	0.00233091
0	0.00233103
PDLIM4	0.00233114
PDE9A	0.00233124
LARP4B	0.00233132
ANGEL1	0.00233138
MYCN	0.00233153
PPM1L	0.0023317
ORAI1	0.00233183
ING1	0.00233202
TDRD5	0.00233203
0	0.0023325
0	0.00233254
UBE2H	0.00233268
EPB41L4A	0.00233283
LRIG1	0.00233305
NDOR1	0.00233317
EPS8L2	0.00233319
0	0.00233345
LARP6	0.0023336
0	0.0023337
SP100	0.00233413
RHOXF2 /// RHOXF2B	0.00233425
FAM229A	0.00233434
DSC3	0.00233446
NCAPH	0.00233449
COG1	0.00233469
0	0.00233469
DIAPH3	0.0023347
EP400	0.00233486
C5orf51	0.0023356
0	0.00233566
ORC1	0.00233595
EXOC6	0.00233608
FAM84B	0.00233623
RRAD	0.00233623
SLC39A8	0.00233634
PRAC1	0.00233636
0	0.00233646
STK17B	0.00233652
NUDT14	0.0023366
OLFML1	0.00233668
0	0.00233687
0	0.00233687
C12orf50	0.00233706
0	0.00233716
ANXA10	0.00233757
SCP2D1	0.00233808
FAF1	0.00233849
0	0.00233921
0	0.00233929
TICRR	0.00233931
0	0.00233943
CRCT1	0.00233961
ANKRD22	0.00233972
LOC101929335	0.00234031
CHAF1A	0.00234035
CHRNA4	0.0023407
TMEM242	0.00234089
KIAA1683	0.00234089
FAM20A	0.00234099
DPH6-AS1	0.00234107
0	0.00234125
ZFHX3	0.0023413
RAVER2	0.00234138
GRM8	0.0023414
GGN	0.00234156
AC004490.1 /// AX746733	0.00234173
0	0.00234175
GALNS	0.00234245
0	0.00234248
0	0.00234252
0	0.00234291
0	0.0023431
MYL10	0.00234341
0	0.00234353
P2RY4	0.00234356
PURA	0.0023436
MIB2	0.00234401
RBP5	0.00234415
AQP11	0.00234431
0	0.0023446
0	0.0023446
DKFZp547J222	0.00234474
SLC25A37	0.0023448
0	0.00234482
0	0.00234504
PAX9	0.00234505
CDA	0.00234515
SLC22A3	0.00234533
0	0.0023454
SLC22A6	0.00234546
GPER1	0.00234559
0	0.00234563
0	0.00234593
0	0.00234602
CHRD	0.00234609
LOC101929719	0.00234614
ZNF704	0.00234622
0	0.00234625
0	0.00234669
KRT19P2	0.00234678
0	0.00234694
0	0.0023473
0	0.00234737
TRPC4	0.0023474
C15orf41	0.00234755
APOB	0.00234764
EIF2AK3	0.00234771
KRT71	0.00234779
ATP11C	0.00234793
TRDN	0.00234798
DSC2	0.00234818
MAGI2-AS3	0.00234818
0	0.00234835
LOC146880	0.00234835
SYTL3	0.0023487
MMRN2	0.00234879
ZNF837	0.00234883
CCDC83	0.0023493
CPSF7	0.00234936
0	0.00234937
BMPR2	0.00234955
LTBP4	0.00234968
MRPL20	0.00234978
CTDSPL	0.00234981
0	0.00234995
ROPN1	0.00235005
ARL14	0.00235014
0	0.00235016
FFAR2	0.00235017
DNAH1	0.00235024
0	0.00235031
CYBB	0.0023504
TBC1D28	0.00235068
VAC14	0.00235095
KRTAP9-8	0.002351
P2RX2	0.00235108
TCEA3	0.00235128
LOC101929036 /// PAH	0.00235138
OR2B2	0.00235148
TNRC6C-AS1	0.00235156
RP11-1007O24.2	0.00235158
RP4-555D20.3	0.00235171
GATAD2A	0.00235207
SLC5A4	0.00235217
0	0.00235226
LINC01279	0.00235237
PAX2	0.00235239
BTBD17	0.0023524
CBY3	0.00235242
MPC1	0.00235265
0	0.00235266
LINC00589	0.00235286
FAM83B	0.00235295
MECOM	0.00235296
RNF144B	0.00235296
PPP1R2	0.00235309
0	0.00235323
0	0.00235346
FAS-AS1	0.00235364
0	0.0023539
0	0.00235405
LINC01114	0.00235419
ERN1	0.00235437
ZNF503	0.00235444
CATSPERB	0.00235524
0	0.00235528
GPR18	0.00235533
0	0.00235534
EXD3	0.0023554
DSG3	0.00235567
SOX17	0.00235572
CSNK1A1	0.00235574
ARGLU1	0.00235587
LIPC	0.00235607
TRIM15	0.00235655
0	0.00235675
UTS2B	0.002357
0	0.00235704
ORM1 /// ORM2	0.0023571
FARSB	0.00235727
SCARF2	0.00235737
TRABD	0.00235745
C20orf62	0.00235752
PPOX	0.00235764
0	0.00235773
PHLDB3	0.00235798
CLEC11A	0.0023581
BCORL1	0.00235816
LFNG	0.00235824
0	0.00235833
RAB3IP	0.00235849
MLANA	0.00235877
0	0.00235881
VN1R3	0.00235893
KLF9	0.00235904
CST11	0.0023592
CLTC	0.00235923
DCAF12L1	0.0023593
CLINT1	0.00235953
SPATA3-AS1	0.00235959
ESPN /// ESPNP	0.00235967
0	0.00235974
SPINK7	0.00235988
SIN3B	0.00235989
GNAS	0.00235992
SCLY	0.00235994
LOC102723684	0.00236008
0	0.00236016
0	0.00236016
0	0.0023602
NPNT	0.00236031
HIATL1	0.00236032
CRYBA4	0.00236041
GPR39	0.00236041
0	0.00236048
0	0.00236049
MFI2-AS1	0.00236053
0	0.00236053
TNFSF8	0.00236059
BCORL1	0.00236065
0	0.0023608
WDR66	0.00236125
ORMDL3	0.00236138
ACPP	0.00236152
S1PR5	0.00236165
MUC12	0.00236181
MDGA1	0.00236192
LINC01431	0.00236219
0	0.00236222
TET1	0.00236233
UACA	0.00236274
0	0.00236277
0	0.002363
DOCK11	0.00236311
NUDT10	0.00236322
ITGB6 /// LOC100505984	0.00236338
LINC00543 /// LINC00543	0.00236343
GINS4	0.00236345
0	0.00236349
0	0.00236349
0	0.00236364
0	0.00236365
RP11-17A4.3	0.00236389
RP11-665C16.8	0.00236391
OPRM1	0.00236394
SLC16A7	0.00236397
KLHL14	0.00236401
PRUNE	0.00236406
TAF6L	0.00236406
ZNF599	0.00236419
CDH1	0.00236428
SEPSECS	0.00236452
0	0.00236455
PATL1	0.00236465
0	0.00236491
GALNT5	0.00236513
NOX1	0.00236544
0	0.00236571
DQ588163	0.00236626
DOCK1	0.0023663
LINC01128	0.00236646
0	0.00236675
RP11-73M18.7	0.00236676
0	0.00236679
0	0.00236689
0	0.00236711
0	0.00236728
0	0.00236745
0	0.00236753
PDE11A	0.00236765
LOC100499194	0.00236777
0	0.00236787
ERI2	0.00236813
0	0.00236819
0	0.00236839
LINC01361	0.00236841
TTC22	0.00236849
0	0.00236859
0	0.00236878
VWF	0.00236882
HOXD13	0.00236919
EXOC5	0.00236926
0	0.0023693
AGFG1	0.00236966
SLC17A9	0.0023698
0	0.00236995
0	0.00236996
LOC101927640	0.00237003
PM20D2	0.00237011
FBXL18	0.00237021
AC016999.2	0.00237021
0	0.00237042
ARSI	0.00237053
TEAD2	0.00237061
LINC01424	0.00237068
0	0.00237071
HSD17B1	0.00237071
PMCHL2	0.00237083
SCNN1A	0.00237083
LBP	0.00237104
ENO1-AS1	0.00237129
KIF14	0.00237144
WNT16	0.0023722
HEPACAM2	0.00237221
UBN2	0.00237251
LOC100506860	0.0023728
SAMD10	0.00237294
COL6A1	0.0023731
LINC00944	0.00237316
0	0.00237338
0	0.00237343
0	0.00237374
0	0.00237384
VCPKMT	0.0023743
0	0.00237431
TKTL1	0.00237492
HCAR1	0.00237504
0	0.00237511
KMT2C	0.00237535
OBP2A /// OBP2B	0.00237538
TIAL1	0.00237544
0	0.00237558
C20orf196	0.00237593
0	0.00237605
0	0.0023762
SOX1	0.00237632
ACY1	0.00237655
0	0.0023766
0	0.00237727
GLI2	0.00237729
LOC101928409	0.00237738
XCR1	0.00237752
ZNF780A /// ZNF780B	0.00237779
LINC00626	0.00237793
HECW2	0.00237812
0	0.00237824
ALG14	0.0023783
PRNT	0.00237847
CD84	0.00237849
0	0.0023787
CXorf57	0.00237886
UTP18	0.00237893
0	0.00237915
CANX	0.00237916
TAS2R5	0.00237922
CNGB3	0.00237928
ABCB4	0.00237948
0	0.0023796
GATA3	0.00237982
OTX2	0.00238005
CCDC150	0.00238008
CHST9	0.0023801
SPTBN1	0.0023801
0	0.00238028
LOC101928035	0.0023803
KIAA1919	0.00238036
0	0.00238046
LOC100996843	0.00238085
LOC101928429	0.00238095
NPY6R	0.00238096
RASSF3	0.00238097
0	0.00238112
0	0.00238167
LOC54944	0.0023817
0	0.00238184
CYP39A1	0.0023819
TMPO	0.00238191
EPS8L2	0.00238204
PTCHD4	0.00238244
0	0.00238247
0	0.00238249
LOC145474	0.00238282
PITPNM3	0.00238285
FOXE1	0.00238303
TGIF2LY	0.00238306
0	0.00238315
BLVRA	0.00238319
TRPC4	0.00238331
SIX6	0.00238334
KRT19	0.00238338
PPP1R3A	0.00238357
TMEM106A	0.00238367
0	0.00238372
ADAMTSL1	0.00238374
VGLL3	0.00238462
USP26	0.00238487
ATP6V0A2	0.00238507
OR2A4	0.00238515
ZBTB12	0.00238519
0	0.00238521
HFE	0.00238533
IRGC	0.00238533
0	0.00238549
OR2I1P /// OR2I1P	0.00238557
HLA-DPB2	0.00238571
ACTR2	0.00238577
INADL	0.00238582
PRO2958	0.00238598
RP11-161I6.2	0.00238649
CERCAM	0.00238657
ADORA2A-AS1	0.00238681
CLIP1	0.00238687
EXOC4	0.002387
TFB1M	0.002387
RP11-330O11.3	0.00238704
RREB1	0.00238711
0	0.00238737
C1QTNF2	0.00238739
OSBPL8	0.00238746
ZNF165	0.00238752
C11orf52 /// HSPB2 /// HSPB2-C11orf52	0.00238757
ZBTB45	0.00238786
RAB9BP1	0.00238803
GPR113	0.0023881
KIAA1456	0.00238843
HOTAIRM1	0.00238845
DMRTA1	0.00238846
0	0.00238857
MICALCL	0.00238859
FCRLA	0.00238868
0	0.00238874
0	0.00238876
0	0.00238877
OR10J1	0.0023893
ITGA11	0.00238936
MCHR1	0.00238945
0	0.00238946
0	0.0023897
TNKS	0.00238975
ASXL1	0.00238985
FUT6	0.00238992
CELSR1	0.0023908
MOP-1	0.00239113
ARHGEF12	0.00239119
0	0.00239124
RGS13	0.00239151
LOC101928461	0.00239174
0	0.00239193
0	0.00239217
0	0.00239221
MSS51	0.00239237
TNFRSF17	0.00239247
0	0.00239254
0	0.00239259
GFM1	0.00239277
OPA1	0.00239292
AC016831.7	0.00239303
GNAS	0.00239312
AC079767.4	0.00239318
AUTS2	0.00239339
GADD45GIP1	0.00239357
FUT3	0.00239372
LOC100506314	0.00239373
ITGB1	0.00239401
0	0.0023942
0	0.00239443
SPTBN1	0.00239473
SLC7A2	0.00239476
COL12A1	0.00239482
0	0.00239486
0	0.00239486
0	0.00239533
LOC102546299	0.00239553
BCL2L11	0.00239559
LOC157740	0.00239563
ELOVL3	0.00239564
LINC01128	0.00239585
EIF3M	0.0023959
SOX30	0.00239592
0	0.00239625
ADAMTS5	0.00239683
0	0.00239687
MCF2L-AS1	0.00239701
TMEM45B	0.00239718
SDR42E1	0.00239724
0	0.0023973
0	0.00239748
0	0.00239749
ZNF316	0.0023976
0	0.00239777
HIST1H3C	0.00239788
0	0.00239796
0	0.00239797
OR51E2	0.00239829
TNKS2	0.00239848
DENND1A	0.00239867
GCOM1 /// POLR2M	0.00239875
IL13RA2	0.00239891
CST9L	0.00239907
LL0XNC01-7P3.1	0.00239943
HDAC7	0.00239944
KIAA1257	0.00239975
HPS3	0.00239981
SCGB3A2	0.00239987
0	0.00239998
CALML5	0.00240012
0	0.00240023
MC2R	0.00240047
ACTR3	0.00240058
RAB3GAP1	0.00240065
CXADR	0.00240069
0	0.00240069
0	0.00240073
0	0.00240076
CTD-2311B13.7 /// P775P	0.00240096
0	0.00240119
WDR90	0.00240121
LINC00852	0.00240162
PCCA	0.00240163
DNAH11	0.00240168
AGTR2	0.00240173
DOK3	0.00240181
0	0.00240196
LOC101928612	0.00240232
SPATC1	0.00240269
LOC100126784	0.00240271
0	0.00240277
0	0.00240284
0	0.00240285
UFSP1	0.002403
CLHC1	0.00240312
0	0.0024032
CEP112	0.0024034
TXNRD3 /// TXNRD3NB	0.0024034
0	0.00240345
HERC2P7	0.00240366
OSBPL10	0.00240383
LOC102724975	0.00240395
H2AFX	0.00240452
IQCH	0.00240461
PIGG	0.00240472
TBX1	0.00240484
ODF3B	0.00240488
FAM205A	0.00240489
GNG12	0.00240493
IQCH	0.00240521
0	0.00240522
XKR6	0.00240526
PARD6G	0.00240545
RP11-115A15.2	0.00240546
GABPB1	0.00240561
ZBED5	0.0024057
FAM209A /// FAM209B	0.00240572
0	0.00240596
INSL3	0.0024061
MED12	0.0024063
ARG1	0.0024065
KIAA1430	0.00240654
UGT2A3	0.00240662
CD244	0.00240666
SLC35D1	0.00240668
CCDC96	0.00240672
AC000111.3	0.00240688
PARP10	0.00240712
ACSS1	0.00240739
TACSTD2	0.00240741
BC016656 /// RP11-168O16.1	0.00240746
CHST9	0.00240776
RP11-61L19.3	0.00240779
0	0.00240782
FBXO41 /// LOC101927826	0.00240809
LINC00661	0.00240823
0	0.00240834
KIAA2018	0.00240835
LOC101929628	0.00240838
PROSER2	0.00240841
ITGB2	0.0024088
STATH	0.00240893
TCRVA15 /// TRAV5 /// TRAV5 /// YME1L1	0.00240922
KLHL31	0.00240923
SNX25	0.00240926
MAP6D1	0.00240935
RPS2P45 /// RPS2P45	0.00240941
EVI5L	0.00240946
CDK5R1	0.00240971
MGST1	0.00240974
0	0.00240985
NBPF20	0.00241001
SSR4P1	0.00241022
WDR60	0.00241025
STOX2	0.00241032
TCTN2	0.00241035
0	0.00241037
N4BP2L1	0.00241042
RP11-79P5.9	0.00241045
CFHR5	0.00241047
0	0.00241048
0	0.00241055
0	0.00241062
0	0.00241066
0	0.00241082
EDDM3A	0.00241084
LHFPL3-AS1	0.00241094
APOA2	0.00241103
POLR2A	0.00241107
NDOR1	0.00241114
GSG1	0.00241121
0	0.00241142
RP11-676J12.6	0.00241155
MTFR2	0.00241162
AGXT	0.00241197
HERC2P7	0.00241205
ASB2	0.00241212
WISP1	0.00241213
KIAA0087	0.00241235
PPP3R2	0.00241236
FLJ36840	0.00241237
SUN5	0.00241244
0	0.00241249
CD36	0.0024125
0	0.00241255
NRXN1	0.00241261
0	0.00241262
0	0.00241286
NTN1	0.00241296
UGT2B4	0.00241313
RNASE7	0.00241334
0	0.00241337
CTD-2611O12.6	0.00241341
TP53INP1	0.00241358
RP11-464F9.20	0.00241373
0	0.00241388
DGKG	0.00241388
ALPK3	0.00241425
0	0.00241458
RNF145	0.0024146
PPM1K	0.00241489
PDGFRA	0.00241491
IGHA1 /// IGHA2 /// IGHD /// IGHG1 /// IGHG3 /// IGHG4 /// IGHM /// IGHV4-31	0.00241494
RPAIN	0.00241498
SNRNP48	0.00241549
DOCK9-AS2	0.00241556
RP5-1098D14.1	0.0024156
LOC101928173	0.00241562
CD1E	0.00241578
0	0.00241581
SHROOM4	0.00241597
0	0.00241599
PURB	0.00241601
NMBR	0.0024161
PRCP	0.00241632
ATP2A1	0.00241642
MKRN2	0.00241682
PCDHGA3	0.002417
RPARP-AS1	0.00241705
CDC20	0.00241706
OR2H4P /// OR2H4P	0.0024171
LOC101929122	0.0024172
PLK1	0.00241757
0	0.0024176
GAGE1 /// GAGE12B /// GAGE12C /// GAGE12D /// GAGE12E /// GAGE12F /// GAGE12G /// GAGE12H /// GAGE12I /// GAGE12J /// GAGE13 /// GAGE2A /// GAGE2C /// GAGE2D /// GAGE2E /// GAGE4 /// GAGE5 /// GAGE6 /// GAGE7 /// GAGE8	0.00241762
LINC01191	0.00241767
MUC3	0.00241771
0	0.00241783
RNF148	0.00241784
RARRES1	0.0024181
LINC00261	0.00241815
MIS18A	0.00241822
0	0.00241884
0	0.00241922
0	0.00241922
HIST1H4L	0.00241945
0	0.00241962
PACSIN2	0.00241962
GRIP1	0.00241979
FLJ32255	0.00241982
SUSD2	0.00242004
0	0.00242048
NR1D1 /// THRA	0.00242055
0	0.00242067
SLC7A11	0.00242072
0	0.00242077
NFIB	0.00242096
SLAMF1	0.00242118
FUT6	0.00242138
TTC26	0.00242149
GAB3	0.00242158
SLC35F3	0.00242162
PDE6H	0.00242172
ISYNA1	0.00242175
ZNF566	0.00242177
0	0.00242179
0	0.00242193
0	0.00242219
EGLN1	0.00242222
TRERF1	0.00242223
ARFGEF2	0.00242231
0	0.00242231
SLC26A1	0.00242233
DSEL	0.00242233
0	0.00242244
COL17A1	0.00242254
KLHDC10	0.00242257
PLCXD1	0.0024227
TACSTD2	0.00242277
KAAG1	0.00242277
MUC4	0.00242287
TRABD2B	0.0024229
0	0.00242298
0	0.00242301
0	0.00242324
0	0.00242325
0	0.00242329
PLSCR1	0.00242344
LOC100996694	0.00242355
0	0.00242384
RSRC1	0.00242405
OPN4	0.00242406
0	0.00242414
FBXO16 /// ZNF395	0.00242423
CLMP	0.00242487
HOXA13	0.00242555
LOC101927552	0.00242557
COL4A4	0.00242579
MYH7B	0.00242583
C1orf115	0.00242584
MMP7	0.00242584
TOP3B	0.00242604
CXCL5	0.00242605
0	0.00242624
0	0.00242628
THAP6	0.00242628
LINC00309	0.00242633
ZNF653	0.00242637
0	0.00242638
CLYBL	0.00242647
RIN3	0.00242675
CDHR5	0.00242684
FOXL1	0.00242685
LOC101060233 /// OPN1LW /// OPN1MW /// OPN1MW2	0.00242693
0	0.00242705
MARCH8	0.00242729
PPP3CB-AS1	0.00242742
MRPS31	0.0024275
USP2	0.00242759
0	0.00242775
REG3A	0.00242784
LOC100128922	0.00242793
0	0.0024283
0	0.00242835
0	0.00242836
TGFBRAP1	0.00242844
0	0.00242867
LOC101928370	0.0024288
0	0.00242893
FKSG29	0.00242895
GNRHR	0.00242917
ARHGEF7	0.00242921
AIPL1	0.00242931
0	0.00242951
RP11-399O19.9	0.00242961
0	0.0024298
DYDC2	0.0024299
0	0.00242993
0	0.00242997
TRMT1	0.00243002
LMTK2	0.00243007
UBIAD1	0.00243013
SLC9A1	0.00243017
HNF4A	0.00243031
EBP	0.00243053
ATP2C2	0.0024307
B3GALT1	0.00243081
MGC40069	0.00243087
RTEL1 /// RTEL1-TNFRSF6B	0.00243107
0	0.0024311
0	0.00243115
PRSS27	0.00243129
OR52K3P	0.00243142
UCKL1	0.00243143
INADL	0.00243144
OTOP2	0.00243149
NUP62	0.00243164
ARID3A	0.00243186
ARHGEF5	0.00243208
RHCE /// RHD	0.00243232
WNT10A	0.00243234
0	0.00243238
TRIM36	0.00243248
0	0.00243256
[truncated: 42,830 more rows]

## Sheet: Unbalanced process 1
	unbalanced process 1										2092 transcripts are affected by unbalanced process 1 (i.e. were assigned G1>0.01 or G1<-0.01)
Gene Symbol	Gi1										Gene Symbol	Gi0
TXNIP	-0.0259903										TXNIP	-0.0259903
SYNDIG1L	-0.0259529										SYNDIG1L	-0.0259529
ZNF595	-0.0243172										ZNF595	-0.0243172
HIPK2	-0.0236024										HIPK2	-0.0236024
HIPK2	-0.0230162										HIPK2	-0.0230162
TXNIP	-0.0215524										TXNIP	-0.0215524
AQP1	-0.0214214										AQP1	-0.0214214
SERPINA3	-0.0206752										SERPINA3	-0.0206752
RHOBTB3	-0.0206381										RHOBTB3	-0.0206381
ZBTB20	-0.0205669										ZBTB20	-0.0205669
MOBP	-0.0205637										MOBP	-0.0205637
MIR612 /// NEAT1	-0.0199254										MIR612 /// NEAT1	-0.0199254
PIP4K2A	-0.0199097										PIP4K2A	-0.0199097
NTRK2	-0.0192414										NTRK2	-0.0192414
PTP4A2	-0.0192405										PTP4A2	-0.0192405
GPR88	-0.0191659										GPR88	-0.0191659
APOC1	-0.0191087										APOC1	-0.0191087
KCNN3	-0.0190891										KCNN3	-0.0190891
GALNT15	-0.0188926										GALNT15	-0.0188926
PENK	-0.0184103										PENK	-0.0184103
MBP	-0.018284										MBP	-0.018284
SRGN	-0.0182389										SRGN	-0.0182389
PPAP2B	-0.0181504										PPAP2B	-0.0181504
MIR612 /// NEAT1	-0.0181498										MIR612 /// NEAT1	-0.0181498
FAM107B	-0.0181256										FAM107B	-0.0181256
ZBTB20	-0.0181138										ZBTB20	-0.0181138
HIPK2	-0.0180942										HIPK2	-0.0180942
AQP1	-0.0180523										AQP1	-0.0180523
ANXA1	-0.0180274										ANXA1	-0.0180274
MYLK	-0.0179988										MYLK	-0.0179988
BCAS1	-0.0179767										BCAS1	-0.0179767
PDK4	-0.0179488										PDK4	-0.0179488
ZBTB20	-0.0178158										ZBTB20	-0.0178158
WNK1	-0.0176994										WNK1	-0.0176994
HIPK2	-0.0176224										HIPK2	-0.0176224
SPARC	-0.0175824										SPARC	-0.0175824
TCTN2	-0.0175562										TCTN2	-0.0175562
NUPR1	-0.0174635										NUPR1	-0.0174635
TXNIP	-0.0174591										TXNIP	-0.0174591
MOG	-0.0174286										MOG	-0.0174286
0	-0.0173739										0	-0.0173739
SPARC	-0.0173509										SPARC	-0.0173509
SCD5	-0.0172978										SCD5	-0.0172978
SOX9	-0.0170576										SOX9	-0.0170576
0	-0.0169906										0	-0.0169906
QKI	-0.0169778										QKI	-0.0169778
BBX	-0.0169609										BBX	-0.0169609
MOBP	-0.0169282										MOBP	-0.0169282
LEPROT	-0.0167968										LEPROT	-0.0167968
CD44	-0.0167464										CD44	-0.0167464
ZBTB20	-0.0167249										ZBTB20	-0.0167249
NDRG2	-0.0166866										NDRG2	-0.0166866
0	-0.0166647										0	-0.0166647
0	-0.0166156										0	-0.0166156
BAG3	-0.0165968										BAG3	-0.0165968
RDX	-0.0165616										RDX	-0.0165616
SPATA13	-0.0165028										SPATA13	-0.0165028
MALAT1	-0.0164482										MALAT1	-0.0164482
0	-0.0163722										0	-0.0163722
MIR612 /// NEAT1	-0.0163289										MIR612 /// NEAT1	-0.0163289
UGT8	-0.0163123										UGT8	-0.0163123
RP11-846E15.2	-0.016292										RP11-846E15.2	-0.016292
PKP4	-0.0162649										PKP4	-0.0162649
CDC5L	-0.016255										CDC5L	-0.016255
ZFP36L1	-0.0162419										ZFP36L1	-0.0162419
SRGN	-0.0160547										SRGN	-0.0160547
PPAP2B	-0.0160467										PPAP2B	-0.0160467
TRIM4	-0.0159871										TRIM4	-0.0159871
FGF1	-0.015873										FGF1	-0.015873
MALAT1	-0.015856										MALAT1	-0.015856
DOCK5	-0.0158541										DOCK5	-0.0158541
DYNC1LI2	-0.0157199										DYNC1LI2	-0.0157199
MTUS1	-0.0156855										MTUS1	-0.0156855
FGF1	-0.0156792										FGF1	-0.0156792
C3	-0.0156771										C3	-0.0156771
MALAT1	-0.0156168										MALAT1	-0.0156168
PALLD	-0.015574										PALLD	-0.015574
GPRC5B	-0.0155565										GPRC5B	-0.0155565
CA12	-0.0155258										CA12	-0.0155258
PABPC1	-0.0153518										PABPC1	-0.0153518
HSPA1A /// HSPA1B /// HSPA1L	-0.0153432										HSPA1A /// HSPA1B /// HSPA1L	-0.0153432
DAAM2	-0.0153231										DAAM2	-0.0153231
MOB3B	-0.0152678										MOB3B	-0.0152678
MBP	-0.0151529										MBP	-0.0151529
PAIP2B	-0.0150992										PAIP2B	-0.0150992
LPAR1	-0.0150878										LPAR1	-0.0150878
ZFP36	-0.014997										ZFP36	-0.014997
ZBTB20	-0.014966										ZBTB20	-0.014966
ANXA2	-0.0148769										ANXA2	-0.0148769
SYPL1	-0.0147865										SYPL1	-0.0147865
LPAR1	-0.0147785										LPAR1	-0.0147785
LHPP	-0.0147464										LHPP	-0.0147464
NCAM1	-0.0147337										NCAM1	-0.0147337
CAPN3	-0.0147045										CAPN3	-0.0147045
HLA-DRA	-0.0146768										HLA-DRA	-0.0146768
CA12	-0.0146575										CA12	-0.0146575
CD99	-0.0146315										CD99	-0.0146315
DTNA	-0.0146247										DTNA	-0.0146247
MTUS1	-0.0146188										MTUS1	-0.0146188
BBX	-0.0145371										BBX	-0.0145371
MAP4	-0.0144699										MAP4	-0.0144699
EFHD1	-0.0144514										EFHD1	-0.0144514
GALNT15	-0.014413										GALNT15	-0.014413
QKI	-0.014382										QKI	-0.014382
ANXA2	-0.0143202										ANXA2	-0.0143202
C4A /// C4B /// C4B_2	-0.0143191										C4A /// C4B /// C4B_2	-0.0143191
HSPA1A /// HSPA1B	-0.0142596										HSPA1A /// HSPA1B	-0.0142596
NCAM1	-0.014254										NCAM1	-0.014254
FKSG49	-0.0142508										FKSG49	-0.0142508
CD99	-0.0142476										CD99	-0.0142476
DOCK5	-0.0142405										DOCK5	-0.0142405
SASH1	-0.0142096										SASH1	-0.0142096
SOX10	-0.0142076										SOX10	-0.0142076
MID1IP1	-0.0141804										MID1IP1	-0.0141804
ZFP36L1	-0.0141074										ZFP36L1	-0.0141074
DGKH	-0.0140549										DGKH	-0.0140549
ARRDC4	-0.0140337										ARRDC4	-0.0140337
CAPN3	-0.0140154										CAPN3	-0.0140154
RASSF2	-0.0140083										RASSF2	-0.0140083
XIST	-0.0140083										XIST	-0.0140083
SPTBN1	-0.014001										SPTBN1	-0.014001
WWTR1	-0.0139976										WWTR1	-0.0139976
SLC25A16	-0.0139316										SLC25A16	-0.0139316
CHI3L1	-0.0138878										CHI3L1	-0.0138878
PMP2	-0.0138844										PMP2	-0.0138844
SIX3	-0.0138477										SIX3	-0.0138477
CD74	-0.0137692										CD74	-0.0137692
C4A /// C4B /// C4B_2	-0.0137472										C4A /// C4B /// C4B_2	-0.0137472
NTRK2	-0.0137383										NTRK2	-0.0137383
KIF5B	-0.0137146										KIF5B	-0.0137146
MTUS1	-0.0137016										MTUS1	-0.0137016
PKP4	-0.0136735										PKP4	-0.0136735
TMEM47	-0.0136723										TMEM47	-0.0136723
ITPKB	-0.0136417										ITPKB	-0.0136417
MAP4K4	-0.0136243										MAP4K4	-0.0136243
PRIMA1	-0.0135716										PRIMA1	-0.0135716
ANLN	-0.0135473										ANLN	-0.0135473
TTR	-0.0135465										TTR	-0.0135465
CDKN1C	-0.0135176										CDKN1C	-0.0135176
LAPTM5	-0.0135172										LAPTM5	-0.0135172
NFIA	-0.0134921										NFIA	-0.0134921
ZNF652	-0.013433										ZNF652	-0.013433
ERBB2IP	-0.013402										ERBB2IP	-0.013402
0	-0.0133942										0	-0.0133942
C1QC	-0.0133782										C1QC	-0.0133782
PSAT1	-0.0133551										PSAT1	-0.0133551
HLA-DRA	-0.0133467										HLA-DRA	-0.0133467
CLIC4	-0.0133262										CLIC4	-0.0133262
COCH	-0.0133254										COCH	-0.0133254
DICER1	-0.0133233										DICER1	-0.0133233
YBX1	-0.0133081										YBX1	-0.0133081
AMER2	-0.0132789										AMER2	-0.0132789
LPL	-0.0132678										LPL	-0.0132678
TMTC2	-0.0132475										TMTC2	-0.0132475
DDIT4	-0.0132396										DDIT4	-0.0132396
ANXA5	-0.0132182										ANXA5	-0.0132182
ADD3	-0.0132024										ADD3	-0.0132024
ADORA2A /// SPECC1L-ADORA2A	-0.0131736										ADORA2A /// SPECC1L-ADORA2A	-0.0131736
SEPT10	-0.0131298										SEPT10	-0.0131298
MAP4K4	-0.0130893										MAP4K4	-0.0130893
GAB1	-0.0130558										GAB1	-0.0130558
STOM	-0.013044										STOM	-0.013044
SRGAP1	-0.0130422										SRGAP1	-0.0130422
ADAMTS1	-0.0130134										ADAMTS1	-0.0130134
ALCAM	-0.0130068										ALCAM	-0.0130068
PREX1	-0.0129822										PREX1	-0.0129822
TMEM165	-0.0129744										TMEM165	-0.0129744
TJP2	-0.0129652										TJP2	-0.0129652
APLNR	-0.0129585										APLNR	-0.0129585
FAM107B	-0.0129463										FAM107B	-0.0129463
PLXNB1	-0.0129325										PLXNB1	-0.0129325
VAMP3	-0.012919										VAMP3	-0.012919
IFI16	-0.0129121										IFI16	-0.0129121
HIPK2	-0.012911										HIPK2	-0.012911
ZCCHC24	-0.0129086										ZCCHC24	-0.0129086
RAB31	-0.0129018										RAB31	-0.0129018
GAB1	-0.0128784										GAB1	-0.0128784
SNHG5 /// SNORD50A /// SNORD50B	-0.0128708										SNHG5 /// SNORD50A /// SNORD50B	-0.0128708
MSN	-0.0128669										MSN	-0.0128669
CA2	-0.0128381										CA2	-0.0128381
TRA2A	-0.0128313										TRA2A	-0.0128313
PIEZO2	-0.0128146										PIEZO2	-0.0128146
SPP1	-0.0127936										SPP1	-0.0127936
VCAN	-0.0127926										VCAN	-0.0127926
0	-0.0127612										0	-0.0127612
MRVI1	-0.0127535										MRVI1	-0.0127535
ERBB2IP	-0.0127495										ERBB2IP	-0.0127495
ABCA1	-0.0127474										ABCA1	-0.0127474
LAMP2	-0.0127406										LAMP2	-0.0127406
VAMP3	-0.0127333										VAMP3	-0.0127333
CALD1	-0.0127133										CALD1	-0.0127133
COL4A5	-0.0127051										COL4A5	-0.0127051
MALAT1	-0.012704										MALAT1	-0.012704
HLA-DQB1 /// HLA-DRB1 /// HLA-DRB4 /// HLA-DRB5 /// LOC100996809 /// LOC101060835	-0.0126872										HLA-DQB1 /// HLA-DRB1 /// HLA-DRB4 /// HLA-DRB5 /// LOC100996809 /// LOC101060835	-0.0126872
RYBP	-0.0126656										RYBP	-0.0126656
AQP4	-0.0126546										AQP4	-0.0126546
LIFR	-0.0126028										LIFR	-0.0126028
PLEKHB1	-0.0125905										PLEKHB1	-0.0125905
GNG7	-0.0125646										GNG7	-0.0125646
0	-0.0125604										0	-0.0125604
LPAR1	-0.0125487										LPAR1	-0.0125487
PNO1	-0.0125342										PNO1	-0.0125342
TRPS1	-0.0125255										TRPS1	-0.0125255
HIPK2	-0.0125132										HIPK2	-0.0125132
DICER1	-0.0125119										DICER1	-0.0125119
KTN1	-0.0124758										KTN1	-0.0124758
EDNRB	-0.0124683										EDNRB	-0.0124683
HLA-DRB1 /// HLA-DRB1	-0.012466										HLA-DRB1 /// HLA-DRB1	-0.012466
ZDHHC9	-0.0124632										ZDHHC9	-0.0124632
CDC42	-0.0124489										CDC42	-0.0124489
RHOQ	-0.0124432										RHOQ	-0.0124432
APOE	-0.0124431										APOE	-0.0124431
ATP6V0E1	-0.0124325										ATP6V0E1	-0.0124325
0	-0.0124128										0	-0.0124128
NEK7	-0.0124069										NEK7	-0.0124069
ADD3	-0.0123397										ADD3	-0.0123397
MYLK	-0.0123362										MYLK	-0.0123362
LGALS3BP	-0.0123321										LGALS3BP	-0.0123321
TNS1	-0.0123165										TNS1	-0.0123165
GSN	-0.0123131										GSN	-0.0123131
LOC101928288	-0.0123102										LOC101928288	-0.0123102
UGT8	-0.0122886										UGT8	-0.0122886
WASF2	-0.0122878										WASF2	-0.0122878
STOM	-0.0122849										STOM	-0.0122849
BMPR1B	-0.0122701										BMPR1B	-0.0122701
SPTBN1	-0.0122667										SPTBN1	-0.0122667
APOC1	-0.012249										APOC1	-0.012249
STAT3	-0.0122315										STAT3	-0.0122315
CADM1	-0.0122292										CADM1	-0.0122292
NKTR	-0.0122206										NKTR	-0.0122206
MAP4	-0.0122156										MAP4	-0.0122156
PIK3C2A	-0.0122002										PIK3C2A	-0.0122002
RAB13	-0.0121871										RAB13	-0.0121871
PLA2G16	-0.0121854										PLA2G16	-0.0121854
ZNF24	-0.0121853										ZNF24	-0.0121853
0	-0.012176										0	-0.012176
ANXA2	-0.0121738										ANXA2	-0.0121738
CPM	-0.012157										CPM	-0.012157
MOBP	-0.0121456										MOBP	-0.0121456
EPS8	-0.0121256										EPS8	-0.0121256
0	-0.0121238										0	-0.0121238
HLA-G	-0.012117										HLA-G	-0.012117
TCF12	-0.0121006										TCF12	-0.0121006
TF	-0.0120893										TF	-0.0120893
S100A10	-0.0120824										S100A10	-0.0120824
MIR612 /// NEAT1	-0.0120579										MIR612 /// NEAT1	-0.0120579
TAGLN	-0.0120407										TAGLN	-0.0120407
VEZF1	-0.0120263										VEZF1	-0.0120263
WSB1	-0.0120195										WSB1	-0.0120195
IFI16	-0.0120158										IFI16	-0.0120158
AHNAK	-0.0120134										AHNAK	-0.0120134
CALD1	-0.0120009										CALD1	-0.0120009
ZCCHC24	-0.0119925										ZCCHC24	-0.0119925
HSPB1	-0.0119895										HSPB1	-0.0119895
0	-0.0119844										0	-0.0119844
SEPT2	-0.0119824										SEPT2	-0.0119824
KCNJ2	-0.0119764										KCNJ2	-0.0119764
DOCK5	-0.0119715										DOCK5	-0.0119715
MAP4K4	-0.0119523										MAP4K4	-0.0119523
OCIAD1	-0.0119461										OCIAD1	-0.0119461
HSPA1A /// HSPA1B	-0.0119336										HSPA1A /// HSPA1B	-0.0119336
ST18	-0.0119286										ST18	-0.0119286
0	-0.0119205										0	-0.0119205
HLA-E	-0.0118957										HLA-E	-0.0118957
IGFBP7	-0.011891										IGFBP7	-0.011891
SGK1	-0.0118676										SGK1	-0.0118676
DDR1 /// MIR4640	-0.0118616										DDR1 /// MIR4640	-0.0118616
TNS1	-0.0118594										TNS1	-0.0118594
AQP4	-0.0118516										AQP4	-0.0118516
ZFP36L2	-0.0118431										ZFP36L2	-0.0118431
HLA-B	-0.0118148										HLA-B	-0.0118148
SLC4A4	-0.0117957										SLC4A4	-0.0117957
SEPP1	-0.0117949										SEPP1	-0.0117949
ITGB1	-0.0117888										ITGB1	-0.0117888
ANTXR1	-0.0117822										ANTXR1	-0.0117822
ADIPOR2	-0.0117635										ADIPOR2	-0.0117635
RGS5	-0.0117435										RGS5	-0.0117435
MOB3B	-0.0117238										MOB3B	-0.0117238
SLC16A9	-0.011706										SLC16A9	-0.011706
FN1	-0.0117027										FN1	-0.0117027
BBX	-0.0116952										BBX	-0.0116952
0	-0.0116739										0	-0.0116739
DOCK1	-0.0116691										DOCK1	-0.0116691
SLC14A1	-0.0116674										SLC14A1	-0.0116674
RFTN2	-0.0116585										RFTN2	-0.0116585
CLIC4	-0.0116476										CLIC4	-0.0116476
SESTD1	-0.0116471										SESTD1	-0.0116471
PALLD	-0.0116456										PALLD	-0.0116456
METTL7A	-0.0116428										METTL7A	-0.0116428
BBX	-0.0116366										BBX	-0.0116366
IGFBP5	-0.0116361										IGFBP5	-0.0116361
NDE1	-0.0116263										NDE1	-0.0116263
ANP32B	-0.0116185										ANP32B	-0.0116185
BBX	-0.011587										BBX	-0.011587
0	-0.011584										0	-0.011584
RNF130	-0.0115726										RNF130	-0.0115726
AQP4	-0.0115659										AQP4	-0.0115659
HLA-E	-0.0115598										HLA-E	-0.0115598
HLA-E	-0.0115449										HLA-E	-0.0115449
PTP4A2	-0.0115396										PTP4A2	-0.0115396
ANKIB1	-0.0115339										ANKIB1	-0.0115339
ALDH6A1	-0.0115257										ALDH6A1	-0.0115257
DDR1 /// MIR4640	-0.0115118										DDR1 /// MIR4640	-0.0115118
PKP4	-0.0114785										PKP4	-0.0114785
RDX	-0.0114771										RDX	-0.0114771
HLA-B	-0.0114764										HLA-B	-0.0114764
FN1	-0.011476										FN1	-0.011476
TMCC3	-0.0114649										TMCC3	-0.0114649
SLC44A1	-0.0114565										SLC44A1	-0.0114565
CLMN	-0.0114163										CLMN	-0.0114163
STAG2	-0.0114111										STAG2	-0.0114111
LOC100272216	-0.0114107										LOC100272216	-0.0114107
COLCA1	-0.0114078										COLCA1	-0.0114078
HLA-DPA1	-0.0114043										HLA-DPA1	-0.0114043
ATP6V0E1	-0.0113945										ATP6V0E1	-0.0113945
SSFA2	-0.0113914										SSFA2	-0.0113914
DTNA	-0.0113795										DTNA	-0.0113795
STAG2	-0.0113744										STAG2	-0.0113744
SLC14A1	-0.0113451										SLC14A1	-0.0113451
EVI2A	-0.0113348										EVI2A	-0.0113348
SALL1	-0.0113255										SALL1	-0.0113255
RNASE1	-0.0113249										RNASE1	-0.0113249
MGST1	-0.0113156										MGST1	-0.0113156
MAP4	-0.0113099										MAP4	-0.0113099
BOK	-0.0113088										BOK	-0.0113088
PBXIP1	-0.0113037										PBXIP1	-0.0113037
SLCO4A1	-0.0113019										SLCO4A1	-0.0113019
YBX3	-0.0112829										YBX3	-0.0112829
S100B	-0.0112799										S100B	-0.0112799
NIFK-AS1	-0.0112682										NIFK-AS1	-0.0112682
FGFR2	-0.0112571										FGFR2	-0.0112571
NPAS3	-0.0112561										NPAS3	-0.0112561
MAP4	-0.0112529										MAP4	-0.0112529
CTNNA3	-0.0112493										CTNNA3	-0.0112493
S100A8	-0.0112456										S100A8	-0.0112456
0	-0.0112401										0	-0.0112401
IFITM3	-0.0112344										IFITM3	-0.0112344
TM4SF1	-0.0112117										TM4SF1	-0.0112117
DCN	-0.0112019										DCN	-0.0112019
TMBIM6	-0.0111994										TMBIM6	-0.0111994
0	-0.0111969										0	-0.0111969
LITAF	-0.0111968										LITAF	-0.0111968
PDK4	-0.0111948										PDK4	-0.0111948
PPAP2C	-0.0111844										PPAP2C	-0.0111844
0	-0.0111657										0	-0.0111657
ZBTB20	-0.0111483										ZBTB20	-0.0111483
RAP1A	-0.0111438										RAP1A	-0.0111438
GLRX3	-0.0111231										GLRX3	-0.0111231
C1orf198	-0.0111143										C1orf198	-0.0111143
CERCAM	-0.0111113										CERCAM	-0.0111113
HIP1	-0.0111107										HIP1	-0.0111107
TP53INP2	-0.0111096										TP53INP2	-0.0111096
ERBB3	-0.0110847										ERBB3	-0.0110847
HLA-DQB1 /// HLA-DRB1 /// HLA-DRB3 /// HLA-DRB4 /// LOC100996809 /// LOC101060835	-0.0110829										HLA-DQB1 /// HLA-DRB1 /// HLA-DRB3 /// HLA-DRB4 /// LOC100996809 /// LOC101060835	-0.0110829
IFITM2	-0.0110696										IFITM2	-0.0110696
MAN2A1	-0.0110662										MAN2A1	-0.0110662
NFASC	-0.0110388										NFASC	-0.0110388
0	-0.0110163										0	-0.0110163
HBA1 /// HBA2	-0.0110133										HBA1 /// HBA2	-0.0110133
DNAJB1	-0.0110001										DNAJB1	-0.0110001
PIP4K2A	-0.0109994										PIP4K2A	-0.0109994
PPP1R1B	-0.0109959										PPP1R1B	-0.0109959
ABCA1	-0.0109838										ABCA1	-0.0109838
RAB2A	-0.0109832										RAB2A	-0.0109832
RTKN	-0.0109798										RTKN	-0.0109798
OPHN1	-0.0109725										OPHN1	-0.0109725
C1QA	-0.0109565										C1QA	-0.0109565
VCAN	-0.0109497										VCAN	-0.0109497
EFEMP1	-0.0109436										EFEMP1	-0.0109436
NPC2	-0.010941										NPC2	-0.010941
DRD2	-0.0109243										DRD2	-0.0109243
TMEM144	-0.0109195										TMEM144	-0.0109195
SOX8	-0.0109059										SOX8	-0.0109059
RAD21	-0.0109011										RAD21	-0.0109011
CPSF2	-0.010901										CPSF2	-0.010901
LOC101930415	-0.0109002										LOC101930415	-0.0109002
0	-0.0108987										0	-0.0108987
SH3GL3	-0.0108858										SH3GL3	-0.0108858
CTDSP2	-0.0108789										CTDSP2	-0.0108789
ZBTB20	-0.0108627										ZBTB20	-0.0108627
HLA-DPB1	-0.0108599										HLA-DPB1	-0.0108599
CA12	-0.0108491										CA12	-0.0108491
ABCA8	-0.0108435										ABCA8	-0.0108435
RELL1	-0.010837										RELL1	-0.010837
TROVE2	-0.0108335										TROVE2	-0.0108335
FGD4	-0.0108323										FGD4	-0.0108323
LOC100506248 /// LOC728026 /// MIR1244-1 /// MIR1244-2 /// MIR1244-3 /// PTMA	-0.0108101										LOC100506248 /// LOC728026 /// MIR1244-1 /// MIR1244-2 /// MIR1244-3 /// PTMA	-0.0108101
VEZF1	-0.0108058										VEZF1	-0.0108058
APOE	-0.010799										APOE	-0.010799
DUSP1	-0.0107893										DUSP1	-0.0107893
PSMB2	-0.0107739										PSMB2	-0.0107739
VIM	-0.0107662										VIM	-0.0107662
CP	-0.0107555										CP	-0.0107555
REEP3	-0.0107524										REEP3	-0.0107524
APOLD1	-0.0107485										APOLD1	-0.0107485
NFKBIA	-0.0107471										NFKBIA	-0.0107471
FRMD4B	-0.010744										FRMD4B	-0.010744
RGS8	-0.0107436										RGS8	-0.0107436
KANK1	-0.010731										KANK1	-0.010731
WSB1	-0.0107216										WSB1	-0.0107216
ZSWIM6	-0.0107197										ZSWIM6	-0.0107197
TOB2	-0.010717										TOB2	-0.010717
ADAMTS1	-0.0107116										ADAMTS1	-0.0107116
0	-0.0107063										0	-0.0107063
LRRC75A-AS1 /// SNORD49A /// SNORD49B /// SNORD65	-0.0107055										LRRC75A-AS1 /// SNORD49A /// SNORD49B /// SNORD65	-0.0107055
CLDND1	-0.0107041										CLDND1	-0.0107041
LOC101243545 /// SNORD4A	-0.0106955										LOC101243545 /// SNORD4A	-0.0106955
NPC1	-0.0106863										NPC1	-0.0106863
ANKRD20A11P	-0.0106789										ANKRD20A11P	-0.0106789
GNA13	-0.0106696										GNA13	-0.0106696
PMP22	-0.0106644										PMP22	-0.0106644
EDIL3	-0.0106643										EDIL3	-0.0106643
LIFR	-0.0106595										LIFR	-0.0106595
ENPP2	-0.0106516										ENPP2	-0.0106516
0	-0.0106409										0	-0.0106409
LINC01094	-0.0106391										LINC01094	-0.0106391
HBA1 /// HBA2	-0.0106389										HBA1 /// HBA2	-0.0106389
DDX17	-0.0105935										DDX17	-0.0105935
0	-0.0105827										0	-0.0105827
ID4	-0.0105779										ID4	-0.0105779
SLC44A1	-0.010574										SLC44A1	-0.010574
APOPT1	-0.0105687										APOPT1	-0.0105687
EFCAB14	-0.0105636										EFCAB14	-0.0105636
STON2	-0.0105617										STON2	-0.0105617
TNPO1	-0.0105586										TNPO1	-0.0105586
CRYAB	-0.0105572										CRYAB	-0.0105572
ZFP36L2	-0.0105554										ZFP36L2	-0.0105554
ERMN	-0.0105544										ERMN	-0.0105544
SEPT8	-0.0105495										SEPT8	-0.0105495
MOBP	-0.0105476										MOBP	-0.0105476
SEMA6A	-0.0105424										SEMA6A	-0.0105424
TMEM106B	-0.0105372										TMEM106B	-0.0105372
FRYL	-0.0105174										FRYL	-0.0105174
LOC101929787	-0.010511										LOC101929787	-0.010511
GBP1	-0.0105092										GBP1	-0.0105092
MCM3AP	-0.0105034										MCM3AP	-0.0105034
ANP32B	-0.0105018										ANP32B	-0.0105018
MAG	-0.0105006										MAG	-0.0105006
HLA-G	-0.0104964										HLA-G	-0.0104964
SYNGR2	-0.0104928										SYNGR2	-0.0104928
CALD1	-0.0104865										CALD1	-0.0104865
CD44	-0.0104833										CD44	-0.0104833
CLDN5	-0.0104795										CLDN5	-0.0104795
HSPD1	-0.0104792										HSPD1	-0.0104792
TM4SF1	-0.0104786										TM4SF1	-0.0104786
0	-0.0104778										0	-0.0104778
EPHX1	-0.0104758										EPHX1	-0.0104758
SIX3	-0.0104725										SIX3	-0.0104725
CXCR4	-0.0104708										CXCR4	-0.0104708
DLC1	-0.010465										DLC1	-0.010465
0	-0.0104418										0	-0.0104418
RALGDS	-0.0104412										RALGDS	-0.0104412
RNF13	-0.0104364										RNF13	-0.0104364
TTYH2	-0.0104257										TTYH2	-0.0104257
IQCK	-0.0104183										IQCK	-0.0104183
0	-0.0104155										0	-0.0104155
RP11-846E15.2	-0.0104115										RP11-846E15.2	-0.0104115
0	-0.0104033										0	-0.0104033
RGS1	-0.0103983										RGS1	-0.0103983
MYO10	-0.010394										MYO10	-0.010394
PTTG1IP	-0.0103919										PTTG1IP	-0.0103919
MBP	-0.0103916										MBP	-0.0103916
KMT2E	-0.0103888										KMT2E	-0.0103888
HLA-B	-0.010379										HLA-B	-0.010379
CBFB	-0.0103775										CBFB	-0.0103775
ROCK1	-0.0103769										ROCK1	-0.0103769
HTR2C	-0.0103713										HTR2C	-0.0103713
0	-0.0103712										0	-0.0103712
0	-0.0103677										0	-0.0103677
ARHGEF37	-0.0103578										ARHGEF37	-0.0103578
MACF1	-0.0103506										MACF1	-0.0103506
CPNE3	-0.0103474										CPNE3	-0.0103474
LIPA	-0.0103457										LIPA	-0.0103457
AIF1L	-0.0103394										AIF1L	-0.0103394
RGS1	-0.0103327										RGS1	-0.0103327
TPR	-0.0103236										TPR	-0.0103236
CD9	-0.0103233										CD9	-0.0103233
DDR2	-0.0103142										DDR2	-0.0103142
PAQR8	-0.010313										PAQR8	-0.010313
0	-0.0103028										0	-0.0103028
RASL12	-0.010301										RASL12	-0.010301
QKI	-0.0102906										QKI	-0.0102906
ZNF552	-0.0102671										ZNF552	-0.0102671
CAPS	-0.0102662										CAPS	-0.0102662
IFITM1 /// IFITM2	-0.0102636										IFITM1 /// IFITM2	-0.0102636
MSI2	-0.0102602										MSI2	-0.0102602
DCN	-0.0102538										DCN	-0.0102538
CDH19	-0.0102535										CDH19	-0.0102535
MGST1	-0.0102533										MGST1	-0.0102533
SCIN	-0.0102505										SCIN	-0.0102505
RGS14	-0.0102474										RGS14	-0.0102474
CTNNA3	-0.0102415										CTNNA3	-0.0102415
TGFB3	-0.0102351										TGFB3	-0.0102351
0	-0.0102291										0	-0.0102291
LPPR1	-0.0102288										LPPR1	-0.0102288
SCD	-0.0102288										SCD	-0.0102288
ABL1	-0.0102266										ABL1	-0.0102266
CDK19	-0.0102262										CDK19	-0.0102262
FTL	-0.0102205										FTL	-0.0102205
ITPKB	-0.0102139										ITPKB	-0.0102139
GLTP	-0.0102133										GLTP	-0.0102133
RHOBTB3	-0.0101976										RHOBTB3	-0.0101976
AZGP1 /// AZGP1P1	-0.0101927										AZGP1 /// AZGP1P1	-0.0101927
ABI3BP	-0.0101926										ABI3BP	-0.0101926
VEZF1	-0.0101896										VEZF1	-0.0101896
EPB41L2	-0.0101703										EPB41L2	-0.0101703
SPOCK3	-0.0101631										SPOCK3	-0.0101631
MAPRE1	-0.010151										MAPRE1	-0.010151
LAPTM5	-0.0101481										LAPTM5	-0.0101481
GAB2	-0.010147										GAB2	-0.010147
CASP2	-0.0101423										CASP2	-0.0101423
GREM1	-0.0101189										GREM1	-0.0101189
FOLH1 /// FOLH1B	-0.0101176										FOLH1 /// FOLH1B	-0.0101176
0	-0.0101163										0	-0.0101163
LOC102724356	-0.0101145										LOC102724356	-0.0101145
LOC100506248 /// LOC728026 /// MIR1244-1 /// MIR1244-2 /// MIR1244-3 /// PTMA	-0.0101087										LOC100506248 /// LOC728026 /// MIR1244-1 /// MIR1244-2 /// MIR1244-3 /// PTMA	-0.0101087
MOG	-0.0101015										MOG	-0.0101015
HBA1 /// HBA2	-0.0100873										HBA1 /// HBA2	-0.0100873
RECK	-0.0100806										RECK	-0.0100806
TRAK2	-0.0100769										TRAK2	-0.0100769
SEC11A	-0.0100689										SEC11A	-0.0100689
SRRM2	-0.0100653										SRRM2	-0.0100653
HLA-A	-0.0100605										HLA-A	-0.0100605
CD163	-0.0100595										CD163	-0.0100595
DAZAP2	-0.0100545										DAZAP2	-0.0100545
PKN2	-0.0100528										PKN2	-0.0100528
FRYL	-0.010045										FRYL	-0.010045
MT1G	-0.0100381										MT1G	-0.0100381
SEPT4	-0.0100281										SEPT4	-0.0100281
PDLIM5	-0.0100279										PDLIM5	-0.0100279
ZBTB20	-0.0100247										ZBTB20	-0.0100247
SECISBP2L	-0.0100203										SECISBP2L	-0.0100203
C8orf44-SGK3 /// SGK3	-0.0100155										C8orf44-SGK3 /// SGK3	-0.0100155
CYP1A2	-0.0100127										CYP1A2	-0.0100127
USP31	-0.0100077										USP31	-0.0100077
B2M	-0.0100071										B2M	-0.0100071
FRG1B	-0.0100065										FRG1B	-0.0100065
MYRF	-0.00999853										SMAP2	0.0100037
MT1E	-0.0099952										OSBPL6	0.0100057
MTMR10	-0.00998943										GNAS	0.0100123
TIMP3	-0.00998078										ITFG1	0.0100175
ACSL1	-0.00997831										AK057657 /// RP11-473I1.9	0.0100189
PPP1R14A	-0.00996799										ATP6V0D1	0.0100203
MAFF	-0.00996602										ZNF385B	0.010026
0	-0.00996041										PHF20	0.010031
IFITM1	-0.00994562										SMARCA4	0.0100341
ACSL1	-0.00994312										NAA30	0.0100394
CERS2	-0.00993704										VAPB	0.0100451
NCAM1	-0.00993577										PRICKLE1	0.0100539
FOLH1 /// FOLH1B	-0.00992741										RNF111	0.0100547
SLC44A1	-0.00991794										PIK3R4	0.0100584
HEY2	-0.00991371										ITGB1BP1	0.0100806
WIPF1	-0.00991063										BCAP29	0.0100831
PRKCH	-0.00990036										GPR155	0.0100834
LOC101929889 /// SPN	-0.00989844										PPFIA2	0.0100912
SCD	-0.00988815										CELF4	0.0100915
IRF2BP2	-0.00988711										NAGPA	0.0100943
CD44	-0.00988615										RTN2	0.0100946
KIF1C	-0.00988251										CA11	0.0100968
FRG1B	-0.00988221										PRRC2B	0.0100972
ELOVL7	-0.00987433										MAST4	0.0101046
SH3BP4	-0.00987159										TUBB	0.0101066
G3BP1	-0.00986271										MAP1B	0.0101104
HBA1 /// HBA2	-0.00985696										ATP6V0B	0.0101182
CD22	-0.00983104										PSMA1	0.0101234
0	-0.00981868										ANKRD32	0.0101264
TMCC3	-0.00981709										PPP2R5E	0.0101319
GRAMD3	-0.00981643										HABP4	0.0101388
LRP2	-0.00981617										C11orf31	0.0101453
TNPO1	-0.00981139										GP1BB /// SEPT5 /// SEPT5-GP1BB	0.0101453
0	-0.0098097										UBE2B	0.0101464
HBB	-0.00980426										COPS3	0.0101474
MIR612 /// NEAT1	-0.00980051										BCL7A	0.0101517
ID3	-0.00979796										SNX13	0.0101528
PAQR6	-0.00979664										HEATR5B	0.0101543
PNISR	-0.00978599										PAK3	0.0101575
CEBPD	-0.00978438										NDUFS1	0.0101579
TEAD1	-0.00978355										PUM2	0.010163
KMT2C	-0.00978303										SUMO3	0.010163
FKSG49	-0.00977872										LOC101927673 /// OTUB1	0.0101638
LHFPL3	-0.00977248										KLF12	0.0101676
SPOCK3	-0.00976206										POLR2B	0.0101682
MALAT1	-0.00975107										PDHX	0.0101701
HIP1	-0.00975084										ARL1	0.0101705
TULP3	-0.00974906										SVIP	0.0101736
0	-0.00973441										GPALPP1	0.0101739
ITGB8	-0.00973066										EAPP	0.0101778
CDC42EP1	-0.00972256										FBXO28	0.0101812
HYPK /// MIR1282 /// SERF2	-0.00972118										RUNDC3B	0.0101834
PABPC3	-0.00971897										NDFIP1	0.0101854
RBM6	-0.0097173										KIF3C	0.0101874
FMNL2	-0.00971606										BEX4	0.010188
FLT1	-0.00971217										TMEM9	0.0101918
HLA-A	-0.00969968										SLC38A1	0.0102008
MCL1	-0.00969228										SHOC2	0.0102031
0	-0.00968959										SMARCA4	0.0102064
TANC1	-0.00968523										PSMG3	0.0102125
CP	-0.00967988										REEP5	0.0102125
NAMPT	-0.00967068										NR1D2	0.0102202
FOLH1 /// FOLH1B	-0.00966678										YWHAZ	0.0102239
IRF2BP2	-0.00966038										IFIT1	0.0102289
MALAT1	-0.00964796										CLIP1	0.0102319
DTNA	-0.00964748										PCYOX1	0.010233
MITF	-0.00964653										STK24	0.0102356
KLC1	-0.00962795										PTPN5	0.010241
LOC101929889 /// SPN	-0.0096075										HDGFRP3	0.0102509
EGFR	-0.00960644										PPP1R7	0.0102522
ZEB2	-0.00960285										ATP6V0A1	0.0102594
IGFBP7	-0.00959348										ANKRD9	0.0102608
CP	-0.0095917										TMEM160	0.0102611
PRR18	-0.0095733										DUSP6	0.0102628
0	-0.00956388										C12orf10	0.010266
SLC4A4	-0.0095592										RFC5	0.010266
MCL1	-0.00955721										CCSAP	0.0102669
EMP1	-0.00955637										BAG5	0.0102717
0	-0.00955555										TIAM1	0.0102746
GPR37 /// SEL1L2	-0.00955053										KIAA1841	0.0102746
C21orf91	-0.00952265										SLC6A15	0.010278
CHI3L1	-0.009518										CEP68	0.0102845
NFE2L2	-0.00951473										GLCCI1	0.0102865
MALAT1	-0.0095126										CAND1	0.0102943
DPYSL5	-0.00950911										SRRM4	0.0102979
ERBB3	-0.00950745										OPTN	0.0102988
HBA1 /// HBA2	-0.00950023										MTA3	0.0103021
LINC00844	-0.00949566										DPP8	0.0103022
MT1M	-0.00949159										RAPGEFL1	0.0103022
GEM	-0.00948616										TOMM20	0.0103052
RHOBTB3	-0.00948361										SLC35B4	0.0103063
GPM6B	-0.00947978										POP7	0.0103095
C6orf48	-0.00946702										TMEM170B	0.0103102
LMO2	-0.00946377										CHMP3 /// RNF103-CHMP3	0.0103127
CGNL1 /// LOC101930344 /// LOC101930349	-0.00945602										FHOD3	0.0103159
SFT2D2	-0.0094553										MAPK1	0.0103177
HSP90B1 /// MIR3652	-0.00945452										ABCA3	0.0103177
CTBP2	-0.00945322										FAXC	0.0103192
PTP4A2	-0.00943646										CLTB	0.01032
0	-0.00942276										PDE1A	0.0103248
LATS2	-0.00942247										RBFOX2	0.0103289
0	-0.00940505										PIANP	0.0103362
PRRC2C	-0.00939886										DENND5B	0.0103429
CENPB	-0.0093772										TARBP1	0.0103431
ANKRD40	-0.00937596										DENR	0.0103469
0	-0.00937483										FAM134B	0.0103495
HLA-F	-0.00933811										UQCRC2	0.010352
HIPK1	-0.0093378										MCF2L	0.0103535
GAB1	-0.00933634										NUP50	0.0103699
MRVI1	-0.00932411										RAB11FIP5	0.0103725
GATAD1	-0.00932063										NBEA	0.0103735
KAT2B	-0.00931022										USP11	0.0103736
MALAT1	-0.00930918										SPIN1	0.0103758
ENAH	-0.0093018										C14orf132	0.0103797
DCLK1	-0.00929792										CHD6	0.0103821
CSRP1	-0.00929539										GLS	0.0103826
GPRC5B	-0.00929214										USP27X	0.0103964
MTUS1	-0.00929022										RAP1GDS1	0.0103987
GFAP	-0.00928655										ETNK1	0.0104008
HIST1H2AC	-0.00928532										BTBD6	0.0104105
KCTD12	-0.00928205										TUBA3C /// TUBA3D	0.0104121
AGO2	-0.0092801										HECTD4	0.0104128
TRPS1	-0.00927766										RALGAPA2	0.0104131
P2RX5-TAX1BP3 /// TAX1BP3	-0.00927471										FOXJ3	0.0104225
SLC44A1	-0.00927338										LOC285147	0.0104272
APOE	-0.00927219										DGKE	0.0104323
ELOVL1 /// MIR6734	-0.00926518										THYN1	0.0104331
ATP6V0E1	-0.00925836										FH	0.0104347
DDR1 /// MIR4640	-0.00925696										TMEFF2	0.0104372
DDR1 /// MIR4640	-0.009254										UTP18	0.0104393
PAQR8	-0.00924943										CSRNP2	0.0104433
Y16709	-0.00923715										FEM1B	0.0104441
0	-0.00923566										MAP1A	0.0104442
ATP1A2	-0.00921938										KIFC2	0.0104463
HAB1	-0.00921793										PSMG1	0.0104487
CTC-425F1.4	-0.00921183										ATR	0.0104642
CD164	-0.00920474										WDR37	0.0104649
GLUL	-0.00920075										HMG20A	0.0104685
ID1	-0.00919344										RXFP1	0.0104771
NKAIN4	-0.00919317										VPS35	0.0104836
MOG	-0.00917705										ARHGEF4 /// LOC101930241	0.0104871
C8orf44-SGK3 /// SGK3	-0.00917462										STRBP	0.0104969
ZNF148	-0.00917425										UBP1	0.0104988
HADHA	-0.00916581										ARF3	0.0105042
0	-0.00916105										ATP6V1C1	0.0105088
PXDC1	-0.00915927										MRPL3	0.0105125
H3F3A /// H3F3AP4 /// H3F3B	-0.00915649										OSBPL10	0.0105227
CSF1R	-0.00915459										ARL15	0.0105282
MAN2A1	-0.00914981										RTN4R	0.0105307
SLC44A1	-0.0091471										0	0.0105318
CHD7	-0.00913986										ANKH	0.0105371
TMEM123	-0.00913956										NAA20	0.0105401
0	-0.00913883										NCR3LG1 /// RP1-239B22.5	0.0105453
HLA-DPA1	-0.00913145										CHM	0.0105472
OLIG1	-0.00912713										TXNL1	0.0105486
0	-0.00912019										USP33	0.0105516
DNAJC1	-0.00911463										PCYOX1L	0.0105517
CAPS	-0.00910401										ATP6V0C	0.0105525
CD59	-0.0091035										PPP3CA	0.0105595
SIRT2	-0.0091005										NR2F1-AS1	0.0105615
0	-0.00909944										FAM115A /// LOC100294033	0.0105632
TMEM241	-0.00909667										FSTL5	0.0105689
BTG1	-0.00909436										0	0.0105727
TNPO1	-0.00909339										AKT3	0.0105729
RARRES3	-0.00909133										ATP5D	0.0105839
NDRG1	-0.00909093										AZIN1	0.0105846
TBL1X	-0.00908915										EPB41L4B	0.0105847
MAN2A1	-0.00907628										ABR	0.0105855
URI1	-0.0090581										PRKAR1B	0.0105917
NBPF10 /// NBPF11 /// NBPF14 /// NBPF15 /// NBPF19 /// NBPF20 /// NBPF25P /// NBPF26 /// NBPF8 /// NBPF9	-0.00905636										B3GALT2	0.0105934
LINC01088	-0.00904924										VAMP2	0.0106036
LPL	-0.00904821										GLS2	0.0106079
SALL1	-0.00904802										PSMA1	0.0106106
ALDH6A1	-0.0090421										PPP2R2C	0.0106157
0	-0.00904087										LNX1	0.0106186
SMC1A	-0.00903956										YWHAG	0.0106204
0	-0.00903595										CIT /// MIR1178	0.0106242
SYNJ2	-0.00903448										FAM174A	0.0106263
FKSG49	-0.00902347										RPRD1A	0.0106318
LAMP2	-0.00901114										CPNE9	0.0106331
H3F3A /// H3F3B /// MIR4738	-0.00900132										VAMP2	0.0106352
ZFHX3	-0.0089958										TECPR1	0.0106485
FA2H	-0.00899235										MDH2	0.010665
CPNE2	-0.00898758										GGCT	0.0106659
IPW /// LOC101930404 /// PWARSN /// SNORD107 /// SNORD115-13 /// SNORD115-26 /// SNORD115-7 /// SNORD116-22 /// SNORD116-28 /// SNORD116-4	-0.00898501										MSL1	0.0106664
0	-0.00897827										ATP5G3	0.0106679
RPL18A /// SNORA68	-0.00897311										AP1M1	0.0106699
A2M	-0.00896802										NDUFA13	0.0106727
GLG1	-0.00896369										DACH2	0.0106749
RNPC3	-0.00896189										PPP2CA	0.0106816
0	-0.00895804										MTDH	0.0106914
NACC2	-0.00895735										NLK	0.0106948
0	-0.00895211										STAM	0.0106949
GBP1	-0.00895118										CYP26B1	0.0107097
FOS	-0.00894989										PAM	0.0107098
RBMS1	-0.00894719										ARF3	0.01072
0	-0.00893335										KIAA1644	0.0107205
SP1	-0.00892255										CACNA1A /// LOC100507353	0.0107232
0	-0.00892232										MIA3	0.0107244
SET /// SETSIP	-0.00891889										C6orf211	0.010729
CNIH4	-0.00891778										ZNF711	0.0107331
TJP1	-0.00891761										TTC9B	0.0107332
RHOU	-0.00891123										C9orf16	0.0107402
PTPN11	-0.00891004										NSG1	0.0107454
ADM	-0.00890793										GABARAPL1 /// GABARAPL3	0.0107466
CAT	-0.00888735										LUZP1	0.0107602
MYOT	-0.0088741										GABRD	0.0107701
RHOQ	-0.00886943										MARK1	0.0107777
PCSK6	-0.00886651										KCTD7 /// RABGEF1	0.0107867
CDKN1C	-0.00886246										CCKBR	0.010788
TRIM22	-0.00884827										C11orf31	0.0107954
CD44	-0.00884037										ABHD14A /// ACY1	0.0107958
PCDH9	-0.00883689										RTCA	0.0108004
MIR6513 /// TMBIM1	-0.00883183										TSPYL2	0.0108023
MEFV	-0.00883138										FSD1	0.0108062
SMA4	-0.00883026										FABP7	0.0108089
WNK1	-0.0088302										FBXO3	0.0108179
0	-0.00883014										FBXO34	0.0108212
RHOG	-0.00882627										CCT8	0.0108266
PLSCR1	-0.00881943										FLJ22184	0.0108303
HBA1 /// HBA2	-0.00881847										BRINP2	0.0108337
MAP4	-0.00881603										SH2D5	0.0108361
IQGAP1	-0.00881321										SMARCA4	0.0108387
DPYSL3	-0.00881186										MAGI3	0.01084
YBX1	-0.00881154										LINC00086 /// LINC00087	0.0108553
SLC31A2	-0.0088092										AP2A2	0.0108663
CBX5	-0.00879166										SNORA29 /// TCP1	0.0108676
H3F3A /// H3F3B /// MIR4738	-0.00878298										SERGEF	0.0108682
MLC1	-0.00878192										MEF2A	0.0108706
KLK6	-0.00877803										RAB26	0.0108717
PLCL1	-0.00877731										PCNX	0.0108723
SEMA6A	-0.0087616										FGF14	0.0108761
0	-0.0087606										HCCS	0.0108804
SLC6A8	-0.0087593										TMEM189 /// TMEM189-UBE2V1 /// UBE2V1 /// UBE2V2	0.0108867
CDK6	-0.00875311										RSL1D1	0.0108972
CD24	-0.00875062										HIGD1A	0.0108985
CAPN3	-0.00874923										PFDN4	0.0109053
0	-0.00874672										ZYG11B	0.0109073
HLA-DMB	-0.00874608										EPB41L3	0.0109092
YES1	-0.00874346										RP11-999E24.3	0.0109151
DNAH3	-0.00874186										PGK1	0.0109227
GPRC5B	-0.00873313										COX5A	0.0109258
PNISR	-0.00872893										RAD23B	0.0109388
KCTD4	-0.00872517										C11orf31	0.0109454
VAMP3	-0.0087244										ATF2	0.0109475
ADH4	-0.00872187										NRIP3	0.0109559
ZHX2	-0.00872171										DEAF1	0.0109623
PLTP	-0.0087212										NAT8L	0.0109624
KMT2C	-0.00871638										MTMR4	0.010963
0	-0.00871362										TCEAL1	0.0109876
PLSCR4	-0.00871199										KCNV1	0.0109878
LAMP2	-0.00871188										WAC	0.0109919
SERINC5	-0.00870859										UGP2	0.0109957
0	-0.0087081										TAB3	0.010996
TWF1	-0.00870689										MET	0.0109962
PICALM	-0.00870279										KLHDC3	0.011007
0	-0.00870142										PRKAG2-AS1	0.0110142
TMEM176B	-0.0086943										CHCHD10	0.0110171
0	-0.0086808										ATPIF1	0.011018
0	-0.00867113										ZMYM4	0.01102
CTC-425F1.4	-0.0086677										RHOT1	0.0110227
HLA-DRB1 /// HLA-DRB4 /// LOC100996809	-0.00866765										FZD3	0.0110277
CSRP2	-0.00865893										PLEKHB2	0.0110279
EDNRB	-0.00865806										RP11-469M7.1	0.0110335
MAP4K5	-0.00864441										DDHD2	0.0110407
NFIA	-0.0086384										MAP1S	0.0110541
ALDH3A2	-0.00863138										CAMK2D	0.011057
SLC6A8	-0.00862799										KPNA6	0.011065
PREX1	-0.00862745										SIN3B	0.0110735
HIST2H2BE	-0.0086267										FOXG1	0.0110749
PTRF	-0.00862275										KCNK1	0.0110823
IGF1R	-0.00862155										CDIP1	0.0110825
FAXDC2	-0.00861996										OIP5-AS1	0.0110908
PTGER3	-0.00861608										0	0.011096
EPOR	-0.00859979										DGKZ	0.0111028
RPL37A	-0.00859515										RRAGA	0.0111122
FXR1	-0.00859284										DCTN2	0.0111128
GALNT15	-0.00858863										0	0.0111203
CSRP2	-0.00858484										SERTM1	0.0111295
HNRNPH3	-0.00858016										PAFAH1B1	0.0111441
SCARB2	-0.00857762										TRMT10C	0.0111445
EMP1	-0.00857552										FRMPD4	0.0111476
FAM102A	-0.00857538										IDH3A	0.011159
PHGDH	-0.00857205										C6orf136	0.0111593
0	-0.00856615										ALS2	0.011168
LINC00341 /// SYNE3	-0.00856304										FMR1	0.0111732
SLC40A1	-0.00856231										FHL2	0.0111791
RGCC	-0.00856162										HIVEP2	0.0111846
PNN	-0.00856133										VPS35	0.0111859
S1PR3	-0.00856073										AAK1	0.0111905
FOLH1B	-0.00854695										REEP5	0.0111924
DCN	-0.0085436										MOCS2	0.011194
NQO1	-0.00853981										STAT1	0.0111979
HSPA2	-0.00853886										FARSB	0.0112004
HLA-C	-0.00853238										RXFP1	0.0112123
LOC100507472 /// PCSK6	-0.00853137										PRMT8	0.0112158
LITAF	-0.00852713										PTPRK	0.0112215
CYTH1	-0.00852622										MCTS1	0.0112253
SLC16A1	-0.00852454										CNTNAP1	0.0112301
HBB	-0.00852177										LGALS8	0.0112305
PLP1	-0.00851946										GALNT16	0.0112324
SV2C	-0.00851122										DCP2	0.0112458
FXYD1	-0.00850365										KNDC1	0.011266
TM4SF1	-0.00849198										MYO9A	0.0112687
TMC6	-0.00849047										PPP1R9A	0.0112968
MAP4K4	-0.00848552										SNPH	0.0113048
0	-0.00848211										DZIP3	0.0113203
GPR37	-0.00847505										KLHL29	0.0113204
TJP1	-0.00847246										PIP5K1B	0.0113211
CLDN11	-0.00846962										FAM92A1	0.011322
IL17RA	-0.00846527										RPL7L1	0.0113306
PLA2G16	-0.0084651										SLC25A32	0.0113326
CRNDE	-0.0084578										EIF3C /// EIF3CL	0.011349
MOBP	-0.00845779										EPS15	0.0113501
VWF	-0.00844873										AP3M2	0.0113677
SET	-0.00844795										CCT6A	0.0113753
TPD52L1	-0.00844539										MYCBP2	0.0113774
DST	-0.008443										SLC30A9	0.0113799
MS4A6A	-0.00844035										RAB15	0.011381
0	-0.00843745										UQCRFS1	0.0113841
ADD3	-0.00843554										ARHGAP32	0.0113858
DTNA	-0.00843307										MRPL42	0.0113951
PPARA	-0.00842189										VAMP2	0.0114062
PABPC1 /// RLIM	-0.00841823										MAPK6	0.0114098
SCD	-0.00841544										TERF2	0.0114209
CMTM5	-0.00841455										RASGRP1	0.0114247
C1QB	-0.00841378										UBQLN2	0.0114314
HBB	-0.0084095										MMP16	0.0114418
SPPL2A	-0.00840686										ABRACL	0.0114428
TMEM125	-0.00840602										PDZRN3	0.0114468
SLC12A7	-0.00840593										INSIG2	0.0114498
LOC100996724 /// LOC100996761 /// LOC101929792 /// LOC101930416 /// PDE4DIP	-0.00839868										GLT1D1	0.0114532
HDAC1	-0.00839845										REPS1	0.0114629
AQP4	-0.00839722										PPP2R2D	0.0114805
MBNL2 /// MBNL2	-0.00839617										CAPRIN1	0.0114855
RPS9	-0.0083957										ABLIM2	0.0114933
0	-0.00839507										DPP8	0.0115008
THBS2	-0.00838793										CTBP1	0.0115088
RYBP	-0.00838186										TOX2	0.0115185
FAM60A	-0.00838109										SMAP1	0.0115206
CLIC4	-0.00838046										ARL6	0.0115256
FOXN2	-0.00837936										SEC16A	0.0115266
MRO	-0.00837316										TPI1	0.0115282
SLC30A5	-0.00837308										UBE2E3	0.0115293
DDX58	-0.00836045										PPM1A	0.0115415
TMEM63A	-0.00835277										AP2S1	0.0115415
TRPS1	-0.00835029										SAE1	0.0115578
PREX2	-0.00834504										DOC2A	0.0115588
ONECUT2	-0.00832928										EFNB2	0.0115591
FAXDC2	-0.00831754										SLC45A4	0.011561
SASH1	-0.00831658										FBXO31	0.0115632
ZDHHC20	-0.0083145										LOC101927458 /// LPHN2	0.0115641
KIF6	-0.00830726										RTN3	0.0115697
SFRP1	-0.00830573										NR3C2	0.011588
CPM	-0.00829294										GRSF1	0.0115952
ZNF528	-0.00829217										SLC24A2	0.0115965
TMBIM4	-0.00828854										SLC2A3	0.0116026
ARHGDIB	-0.00828627										RALGPS1	0.0116027
KIF5B	-0.00828257										KLHDC3	0.0116028
EFS	-0.00827979										BCAS4	0.0116106
CALD1	-0.00827893										BRWD1	0.0116181
ZNF652	-0.00827593										ZMAT3	0.0116192
CTNNA1	-0.00827004										PFN2	0.0116234
ANP32A	-0.00826321										C14orf132	0.0116391
ARRDC2	-0.00824857										BDP1	0.0116472
KLF15	-0.00824689										PNMA1	0.0116546
TMEM144	-0.00824172										HN1	0.0116621
VCAN	-0.00824166										PPP1R12A	0.0116647
LMNA	-0.00824165										HERC2	0.0116717
USP47	-0.0082275										FAM134A	0.0116722
MYBPC1	-0.00822544										F8A1 /// F8A2 /// F8A3	0.0116781
TOB2	-0.00822459										HMGCS1	0.0116865
NFIA	-0.0082226										STOML1	0.0116884
CTD-2325A15.5	-0.00822011										PITPNA	0.0116978
PDGFRA	-0.00821751										ACTR10	0.0117036
NFIA	-0.0082092										CCDC132	0.011707
FN1	-0.00820313										TMEM65	0.0117118
SPAG9	-0.00820139										KLHDC2	0.0117157
FNBP1	-0.00819752										GRM1	0.0117166
SRGAP1	-0.00819675										PRKCZ	0.0117182
ANP32E	-0.00819229										GALNT11	0.0117217
0	-0.0081862										PPTC7	0.0117231
FAM181B	-0.00818002										NRCAM	0.0117232
KIF5B	-0.00817572										CTXN3	0.0117237
GNG12	-0.00817178										LMO3	0.0117319
RP11-38P22.2	-0.00817109										KCNS1	0.0117422
PLIN3	-0.00816368										SYNPO	0.0117437
DOCK10	-0.00815759										ADCY2	0.0117475
LOC100506725	-0.00814949										SNCA	0.0117517
0	-0.00814229										PRSS3	0.0117601
USP47	-0.00814099										KHDRBS3	0.0117849
CDK19	-0.008131										PXYLP1	0.0117953
LUC7L3	-0.00812881										LRRC40	0.0117956
0	-0.00812017										IMMT	0.0118061
RPS27	-0.00811765										DNM1L	0.0118093
PLEKHH1	-0.00811185										MDH2	0.0118105
GREM1	-0.00811118										MCUR1	0.0118136
PRPF38B	-0.00811018										EIF1AX	0.0118326
LIMCH1	-0.0080995										DNAJC5	0.0118401
UNC5B	-0.00809498										SRCIN1	0.0118584
CLIC1	-0.00809424										GNAS	0.0118726
SUN2	-0.00808901										CRMP1	0.0118743
ASPA	-0.00808741										C6orf136	0.0118757
PSEN1	-0.00808651										ATP6AP1	0.0118764
BPTF	-0.00808498										SPINT2	0.0118788
MIR6716 /// PHLDB1	-0.0080832										XPR1	0.0118814
SIX3-AS1	-0.00807976										GGNBP2	0.0118871
PLOD2	-0.00807913										DNAJA2	0.0118986
BRD7	-0.00807604										AHNAK2	0.0119051
CTNNA1	-0.00806982										PRPS2	0.0119054
FGFR2	-0.00806615										GPR22	0.0119092
MS4A7	-0.00805852										CELF5	0.0119135
NUCKS1	-0.00805581										HS3ST2	0.0119136
LACC1	-0.0080409										SYN2	0.0119172
RGS9	-0.00803493										MUM1L1	0.0119177
SNX18	-0.0080319										FAM213B	0.0119185
FN1	-0.00802605										TMX3	0.0119198
ID4	-0.00801848										SBNO1	0.0119222
0	-0.00801771										CAMK2B	0.0119273
OSMR	-0.0080094										AP2A2	0.011934
HNRNPH3	-0.00800789										ANXA6	0.0119362
PAPD4	-0.00800356										ARHGDIG	0.0119618
0	-0.00800289										CX3CL1	0.0119633
H3F3A /// H3F3B /// MIR4738	-0.00799753										TTLL7	0.0119691
CCDC88C	-0.00799656										DNAJC5	0.0119824
RASGRP3	-0.00799419										ALAS1	0.0119931
GOLIM4	-0.00798895										CASD1	0.011995
DDR2	-0.00798511										SIPA1L1	0.0119966
NAMPT	-0.00798372										VDAC1	0.0119969
SLC1A2	-0.00797851										NDUFA5	0.0120044
PON2	-0.00797781										RGPD3 /// RGPD4 /// RGPD5 /// RGPD6 /// RGPD8	0.0120075
TPD52L1	-0.00797305										CADM2	0.01201
CFLAR	-0.00796774										REEP1	0.0120147
SPX	-0.00796738										RANBP9	0.0120152
CYP2J2	-0.00796627										BTBD3	0.0120378
ABCA2	-0.00796355										RPS6KC1	0.012038
SEMA6A	-0.00796124										DPP6	0.0120409
TNS3	-0.0079612										PAK7	0.01205
PDE10A	-0.00796027										LRRC4C	0.0120502
MSI2	-0.00795841										PREPL	0.0120532
0	-0.00795779										PEX5L	0.0120636
GADD45B	-0.00795641										CDS1	0.0120696
LRP10	-0.00795416										HK1	0.012074
MIR612 /// NEAT1	-0.00795056										RUNDC3B	0.0120864
CHN2	-0.00795004										RASA1	0.0120898
ABCA2	-0.0079495										CEP170B	0.0120901
HNRNPH3	-0.00794666										PREPL	0.0120958
CCAR1	-0.00794459										LRRN3	0.0121158
ARL6IP6	-0.00793359										MEAF6	0.0121282
SLC9A9	-0.00793194										MAP9	0.0121397
PRRC2C	-0.00793157										AMN1	0.0121542
LIFR	-0.00793157										PRRG3	0.0121591
FAM107A	-0.00792854										RUSC1	0.0121671
SERPINA1	-0.00792784										TUBG1	0.0121682
SYPL1	-0.00792627										GLOD4	0.0121693
SLC4A2	-0.00791339										SYNPR	0.0121779
FLT1	-0.00791269										ATP6V1C1	0.0121794
IFNGR1	-0.00791206										UNC5D	0.0121882
FNTA	-0.00791142										ATP5B	0.0122041
GCOM1 /// POLR2M	-0.007911										SPTBN2	0.0122068
DNALI1	-0.00790973										STXBP5	0.0122083
ZRANB2	-0.00790448										SARS	0.0122185
CNTN2	-0.00790388										PRICKLE2	0.0122189
CEP350	-0.00790322										CDK5	0.0122369
PHLPP1	-0.00790082										SLITRK1	0.012241
NDRG2	-0.00789894										PRSS3	0.0122571
SLC5A11	-0.00789118										HOMER1	0.0122575
CFH /// CFHR1	-0.00789033										HACE1	0.0122597
PPP1R3C	-0.00788986										RAB4A /// SPHAR	0.0122626
AMOTL2	-0.00788814										RANBP9	0.0122679
RHOA	-0.00788693										0	0.012271
HLA-C	-0.00788573										NDFIP2	0.0122735
MT1X	-0.00788559										NICN1	0.0122923
ADIRF	-0.00788544										LRRC47	0.0122984
KIF13A	-0.00788341										MKKS	0.0122998
MEGF10	-0.00788073										RASAL2	0.0122999
HNRNPC	-0.00786868										ACTL6B	0.0123008
PACS2	-0.00786657										SRPK2	0.0123011
RARRES2	-0.00786475										DNM3	0.0123043
0	-0.00785767										SERF1A /// SERF1B	0.0123047
CFL2	-0.00785715										BCAT1	0.0123098
SAP18	-0.00785685										MFSD6	0.012315
PTPRO	-0.00785327										ANKRD17	0.0123196
0	-0.00785092										CLASP2	0.012325
HLA-C	-0.00785066										SOCS7	0.0123355
GLG1	-0.00784316										P4HTM	0.0123378
VSIG4	-0.00783779										IPO5	0.0123387
PRRG1	-0.00783328										STX7	0.0123421
SYNCRIP	-0.00782461										PLXNC1	0.0123448
SORT1	-0.00782099										LINC00086	0.0123483
0	-0.00782037										SCG2	0.0123529
CACHD1	-0.00781892										LINGO1	0.0123541
LPP	-0.00781784										KATNB1	0.0123597
RNF213	-0.00781405										RUFY3	0.0123638
OSBPL11	-0.00781364										NELL1	0.0123649
PROX1	-0.0078054										PFKM	0.0123763
HSPB8	-0.00780335										GSTA4	0.0123771
FOXP1-IT1	-0.00780159										CLSTN1	0.0123849
CRTAP	-0.00779659										CTNNA2	0.0123885
FBXL7	-0.00779536										SNRK	0.0123935
CAMTA1	-0.00779515										NUDCD3	0.012398
MAL	-0.00779205										TRIM36	0.0123987
RNASET2	-0.00778858										TIMM23 /// TIMM23B	0.0124065
NBPF10 /// NBPF14 /// NBPF26 /// NBPF9	-0.00778741										CCND2	0.0124079
MT1E	-0.00778741										SLC25A3	0.012409
DPH5	-0.00777347										TUBB2A	0.0124182
CNDP1	-0.00777257										CIRBP	0.0124217
BCL11B	-0.00777145										ANO5	0.01243
MIR1244-3	-0.00777061										TSHZ3	0.0124309
MEG3	-0.00777039										OPN3	0.0124454
CA12	-0.00776655										B4GALT6	0.0124479
KTN1	-0.0077656										SEZ6L	0.0124486
MALAT1	-0.00775922										CLCN4	0.0124534
CDC42EP4	-0.00775326										NCS1	0.0124628
0	-0.00775146										SMS	0.0124758
TROVE2	-0.00775142										EVL	0.0124862
0	-0.00774855										WBSCR17	0.0124921
HN1L	-0.00774612										APOO	0.012502
TGFBR2	-0.00774591										LPHN3	0.0125062
SYNJ2BP /// SYNJ2BP-COX16	-0.007737										BICD1	0.0125082
GLUL	-0.00773527										OLA1	0.0125112
ENPP2	-0.007727										NISCH	0.0125246
CTBP2	-0.00772466										CBX7	0.012529
0	-0.00772266										PPP2CA	0.0125331
PPP1R1A	-0.00772105										KLHL7	0.0125391
LRRC1	-0.00771937										DYNLT3	0.0125397
ATP11C	-0.00771654										IFT57	0.0125415
NOL12 /// TRIOBP	-0.00771382										RAD23B	0.012547
SLAIN1	-0.00771361										RIT2	0.0125486
LRP2	-0.0077093										OXR1	0.0125539
CRYBG3	-0.00769433										NCOA7	0.0125543
ALPK1	-0.00769376										SIRPA	0.0125597
IRF2BP2	-0.00769146										TUBG2	0.0125685
ELK4	-0.00769031										BABAM1	0.0125706
FKBP5	-0.00767468										TMEM126A	0.012578
EBF1	-0.00767138										UAP1	0.012583
ELOVL1 /// MIR6734	-0.00767138										NDEL1	0.0125866
IFI44L	-0.00767131										LYRM7	0.0126068
MID1	-0.00766737										MADD	0.0126134
CDK19	-0.00766296										SEPT3	0.0126144
ZFHX4	-0.00766229										TBPL1	0.0126148
SMAD5	-0.00766005										CACNB1	0.0126252
CPQ	-0.00765957										KCNC1	0.0126266
0	-0.00765815										CACNB3	0.0126317
LOC102724870	-0.0076573										PKNOX2	0.0126337
FGFR2	-0.00765563										DPP10	0.0126388
PMP2	-0.00765417										RUNX1T1	0.0126442
ZNF652	-0.00765413										PITHD1	0.0126529
LHFPL2	-0.00765338										SRSF3	0.012658
SLC11A1	-0.00765243										YPEL3	0.0126581
TOR4A	-0.00764466										MFSD4	0.0126597
GLTP	-0.00764271										STS	0.0126612
FAM81B	-0.00764085										RHBDD2	0.0126623
LOC642236	-0.0076366										TSPYL4	0.0126854
PRPF40A	-0.00763441										NDUFAB1	0.0126857
EZR	-0.0076317										RAB6B	0.0126912
DLG1	-0.0076288										BAIAP2	0.0126968
GADD45B	-0.00762536										PPP1R2	0.0127044
0	-0.00762207										IQSEC1	0.0127084
GNA12	-0.00761772										DENR	0.0127097
SNX6	-0.00761514										GABBR1	0.0127197
EIF5B	-0.00761493										TTC19	0.0127204
DDX17	-0.00761114										PLCL2	0.0127223
MACF1	-0.00760003										GHITM	0.0127235
0	-0.00759793										0	0.0127241
SP110	-0.00758357										FGFR1OP2	0.0127243
TAGLN2	-0.00758269										EGR1	0.0127289
LEPROT	-0.0075797										KATNAL1	0.01273
SEMA4D	-0.00757878										FGF14	0.0127528
YES1	-0.00757876										TRAPPC6B	0.0127538
BBX	-0.00757542										PKI55	0.0127634
BGN	-0.00757392										MAGI1	0.0127664
MYL9	-0.00756753										RAB11A	0.012774
0	-0.00756495										SNCG	0.0127746
GAB1	-0.00755774										SYN2	0.0127769
IFT80 /// TRIM59	-0.00755695										HMGCR	0.012777
RP4-781L3.1	-0.00755686										DSTYK	0.0127846
ZBTB38	-0.00754388										FAM169A	0.0127962
RBBP6	-0.00754377										FBXO9	0.012799
TPP1	-0.00753598										BRI3BP	0.0128097
ANKRD20A1 /// ANKRD20A2 /// ANKRD20A3 /// ANKRD20A4	-0.00753269										CYB5B	0.0128118
KLHL13	-0.0075295										LRP8	0.0128176
C1QTNF5 /// MFRP	-0.0075284										AKT3	0.0128217
ANGPT2	-0.00752483										MEG3	0.0128281
ASPA	-0.00752467										BAIAP2	0.0128311
MTDH	-0.00751953										SPRYD7	0.012836
LSM14A	-0.00751774										NCDN	0.0128546
RP4-575N6.5	-0.00751458										SLC1A1	0.0128578
MT1X	-0.00751389										NPTN	0.0128605
CD24	-0.00750845										LAMTOR3	0.0128714
ALDH1B1	-0.00750379										VPS13D	0.0128838
0	-0.00748801										KRT222	0.0128865
MAP4K5	-0.00748714										CAPRIN2	0.0128868
TNPO1	-0.00748418										MYADM	0.0128877
LINC01105	-0.00748168										TRNP1	0.0129057
ITGB2	-0.00747936										PCMT1	0.0129112
WIPF1	-0.00747556										MAST4	0.0129127
CSDE1	-0.00747109										DYRK1A	0.0129141
COLEC12	-0.00746463										SYTL2	0.0129242
0	-0.00745943										NTRK2	0.0129344
PIFO	-0.00745916										FAXC	0.0129355
GS1-111G14.1	-0.007459										AVL9	0.0129369
CD163	-0.00745559										SLC17A6	0.012951
IL1RL1	-0.00744927										SORBS2	0.0129579
KIAA1598	-0.00744722										FZD3	0.0129624
PLEKHH1	-0.00744685										ATP2B2	0.0129936
GPSM2	-0.00744674										TSPAN7	0.0129959
SCAF11	-0.0074446										NGB	0.0130195
CRIPT	-0.00743971										DNAJC6	0.0130264
C10orf10	-0.00743508										MCF2L	0.0130313
RPL18AP16 /// RPL18AP16	-0.00743139										TSPYL1	0.013034
VCAN	-0.0074293										PITPNB	0.0130345
DBNDD2 /// SYS1 /// SYS1-DBNDD2	-0.00742773										HSPH1	0.0130383
FA2H	-0.00742747										NEDD4L	0.0130466
DNAJC15	-0.00742736										SACS	0.0130686
EPAS1	-0.00742476										CDH13	0.0130795
CASK	-0.00742426										PCDH19	0.0130892
MT1F	-0.00740832										LANCL2	0.0130928
PLLP	-0.0074072										NRXN1	0.0131125
FERMT2	-0.00740667										FAM13B	0.0131173
QKI	-0.00739773										ST8SIA5	0.0131304
HSP90B1	-0.00739362										GRAMD1B	0.0131499
PCGF5	-0.00739204										FBXO21	0.0131517
TF	-0.00737819										ADRB1	0.0131596
TENC1	-0.00737079										PRKAA2	0.0131782
WASF2	-0.00736917										ACTR6	0.0131797
MAPRE1	-0.00736812										HPCAL1	0.0131883
ZBTB20	-0.00736654										CACYBP	0.0131888
PADI2	-0.00736547										NUDT11	0.0131946
IL13RA1	-0.00735374										GSKIP	0.0132021
CD44	-0.00735103										SVIP	0.0132038
0	-0.0073487										SCN3A	0.0132078
KIF1B	-0.00734809										ARHGAP32	0.0132112
0	-0.0073463										RNMT	0.0132142
CHD4	-0.00734282										DLX1	0.0132216
MXI1	-0.00734185										YTHDC2	0.0132286
MBP	-0.00734097										STAU2	0.0132329
SAT1	-0.00733634										LRPPRC	0.013233
SOX9	-0.00732946										GDAP1	0.013235
PLOD3	-0.00732943										PPME1	0.0132487
HVCN1	-0.00732454										ARMCX2	0.013252
SAV1	-0.0073233										NCKIPSD	0.0132636
0	-0.00732123										RTF1	0.0132789
C11orf96	-0.00732079										KCTD1	0.0132925
RP11-124L9.5	-0.00732033										LOC101060363 /// PPIA	0.0132953
FKSG49	-0.00730886										0	0.0132974
AP3B1	-0.0073085										ESRRG	0.0133081
TTLL7	-0.00730697										GNB5	0.0133235
CDKN1C	-0.00730546										AUH	0.0133242
IVNS1ABP	-0.00729684										GNB5	0.0133249
CASC3 /// MIR6866	-0.00729646										EPB41L3	0.0133294
PDLIM5	-0.00729491										PI4KA /// PI4KAP1 /// PI4KAP2	0.0133443
PDE8A	-0.00729314										NEFH	0.0133475
HAMP	-0.00728874										SNRNP25	0.0133533
HAPLN2	-0.00728827										TMEM132D	0.0133545
GUSBP3 /// GUSBP9	-0.00728794										KCTD16	0.0133561
0	-0.00728359										BECN1	0.0133704
0	-0.00728359										SLIT1	0.0133759
SLC7A11	-0.00727242										IARS	0.0133769
HHATL	-0.00727159										KCMF1	0.0133906
EFNA1	-0.00726468										PARP2	0.0133911
RPS6KA2	-0.00726162										CNTN1	0.0133973
JUP	-0.00726046										YPEL4	0.0134072
WLS	-0.00725534										RNFT2	0.013411
ENAH	-0.0072535										RBFOX2	0.0134157
ANKRD18A	-0.00725254										UBE2B	0.0134186
AEBP1	-0.00724811										SATB1	0.0134194
0	-0.00724331										CAMK2D	0.0134233
METTL7A	-0.00724111										EML6	0.0134306
0	-0.00723692										NGRN	0.013431
TTYH2	-0.00723225										SHANK2	0.0134384
ROCK1	-0.00723111										AASDHPPT	0.0134397
PSAT1	-0.00723081										RBFOX3	0.0134441
TNFRSF18	-0.00722944										TANC2	0.0134562
ZIC1	-0.00722548										LOC100288911	0.0134681
ZNF24	-0.00722201										GLRB	0.0134698
EEF1D	-0.00721629										RFTN1	0.0134899
KLF3	-0.00719999										TRUB1	0.0135099
WSB1	-0.00719695										WIPF3	0.0135237
0	-0.00719656										PDP1	0.013536
FGFR2	-0.00719598										TMEM130	0.0135536
USP47	-0.00719321										GLRX2	0.0135536
STX17	-0.00719214										SLC25A40	0.0135572
CHRNA3	-0.00718943										BAI2	0.0135773
WIPF1	-0.00718753										EPHA4	0.0135775
PAX6	-0.00718443										AKAP12	0.013603
0	-0.00718441										TTC39C	0.0136087
0	-0.00718441										CD99L2	0.0136124
CDKN1A	-0.00718009										B3GALT2	0.0136184
GATM	-0.00717695										RND1	0.0136193
PTPN13	-0.00717468										MRAP2	0.013627
ADARB2	-0.00716981										CALM1 /// CALM2 /// CALM3	0.0136328
B2M	-0.00716509										EIF5A2	0.0136391
GNG7	-0.00716372										ATCAY	0.0136406
0	-0.00716284										TPD52	0.0136477
SASH1	-0.00715773										LMBRD2	0.0136478
FADS1 /// MIR1908	-0.00715674										SEPT11	0.0136532
GOLIM4	-0.00715527										TCERG1	0.0136561
LPP	-0.00715067										NRIP1	0.0136618
SLC9A3R1	-0.00714895										ATMIN	0.0136641
PTPN11	-0.00714547										BRAF	0.0136685
ZNF397	-0.00714016										CACNG8	0.0136819
SMARCC1	-0.00713695										C15orf61	0.0136951
SLCO1A2	-0.00712952										0	0.0136988
FOXO1	-0.00712804										PPP2R5C	0.0136993
FLNA	-0.00712723										LPHN1	0.0137
LAYN	-0.00712468										SLC4A1AP	0.0137037
RHOU	-0.00712462										CLTB	0.013716
TMEM63A	-0.00712188										COPS7A	0.0137183
IL1R1	-0.00712046										FAIM2	0.0137191
RP11-846E15.4	-0.00711859										GPI	0.0137211
GMFB	-0.00711575										OXCT1	0.0137264
EFEMP1	-0.00711562										SLC4A8	0.0137326
DGKH	-0.00711293										CBLN4	0.0137421
ZNF816 /// ZNF816-ZNF321P	-0.00710586										RP11-320H14.1	0.0137449
RFTN2	-0.00710253										SLC35A1	0.013751
RPL13 /// SNORD68	-0.00710237										HERC1	0.013751
LOC100506248 /// LOC728026 /// MIR1244-1 /// MIR1244-2 /// MIR1244-3 /// PTMA	-0.00710107										SLU7	0.013752
SEPT2	-0.00709996										RP11-247L20.4	0.0137569
MTURN	-0.00709725										MAN1C1	0.0137753
CPQ	-0.00709231										NEGR1	0.0137819
OLIG2	-0.00709148										KIF21A	0.0137837
RAB40B	-0.00708721										HIVEP2	0.0137978
CTBP2	-0.00708609										SS18L1	0.0138005
PODXL	-0.0070853										MIR124-2HG	0.013801
ASMTL-AS1	-0.00708529										LRRC8B	0.0138031
HEG1	-0.00707859										IER5	0.0138107
C21orf37	-0.00707761										GCC2	0.0138172
MAML2	-0.00707614										PIN1	0.0138188
MBD3	-0.00707217										TCEAL2	0.0138322
GBP1	-0.00706892										MAPK10	0.01384
CRNDE	-0.00706751										NPTX2	0.0138441
RHOQ	-0.00706739										MTCL1	0.0138471
FLT1	-0.00706351										NRXN1	0.013861
UCP2	-0.00706063										SLBP	0.0138681
0	-0.00705952										TSNAX	0.0138724
SAP18	-0.00705816										RTN1	0.0138745
VAT1	-0.00705344										RANBP1	0.0138871
HEG1	-0.00705141										ACTR3B	0.0138986
TIMP3	-0.00704824										RNF6	0.0139173
PTMA	-0.00704705										PSMD1	0.0139199
UVSSA	-0.00704518										DAPK1	0.0139202
SSR1	-0.00704123										TLN2	0.0139223
NOTCH3	-0.00704013										ENPP5	0.0139688
NAV1	-0.00703834										SIPA1L2	0.0139738
DTNA	-0.00703627										FAM131A	0.0139853
VCAN	-0.00703541										ATL1	0.0139875
NUCKS1	-0.00703043										LCMT1	0.0139943
ZNF236	-0.00703015										GUCY1B3	0.0139977
TMEM165	-0.00702721										SLC35F1	0.0140183
EFCAB14	-0.00702594										NKIRAS1	0.0140207
0	-0.00702285										SUB1	0.0140233
HNRNPC	-0.00702219										B4GALT5	0.0140259
TCF4	-0.00701947										UQCRC1	0.0140304
RSF1	-0.00701946										UQCRC2	0.014031
ARHGAP5	-0.00701816										ADARB1	0.0140381
C20orf27	-0.00700987										CA10	0.0140428
ITM2A	-0.00700953										HMGCR	0.0140489
TGFA	-0.00700863										YWHAZ	0.0140651
SPAG9	-0.00700788										TMX4	0.0140708
SFSWAP	-0.0069981										LRP11	0.014079
CD24	-0.00699752										ITPKA	0.0140938
TNFRSF10B	-0.00699356										RNF157	0.014125
LOC102724250 /// NBPF1 /// NBPF10 /// NBPF11 /// NBPF14 /// NBPF15 /// NBPF19 /// NBPF26	-0.00699292										KCNA1	0.0141292
NSUN6	-0.00699292										GLRX	0.0141366
BCL6	-0.00698903										CNKSR2	0.0141415
SOX10	-0.00698532										LPPR4	0.0141426
MT1H	-0.00698251										RAB22A	0.0141587
SAMHD1	-0.00698057										TMEM59L	0.0141871
TMBIM4	-0.00697538										GABARAPL1	0.0141914
KLF9	-0.00697041										EFNA5	0.0142085
0	-0.00696605										TMEM132B	0.0142127
0	-0.00696605										UNC13A	0.0142227
CYBRD1	-0.00696577										MYRIP	0.0142379
CDC42EP4	-0.0069634										C3orf14	0.0142422
0	-0.00696159										SNAPC5	0.0142459
DCAF8	-0.00696155										PRKCB	0.0142612
RPL27A	-0.00696086										FBXO41 /// LOC101927826	0.0142621
NKX2-2	-0.00695909										KLHL12	0.0142682
SCAF11	-0.00695855										SUDS3	0.0142726
MAGT1	-0.00695116										NRG3	0.0142755
GABPA	-0.00694427										AP2S1	0.0142769
TCF3	-0.00694399										GSK3B	0.0142801
SAMD4A	-0.00694227										RFK	0.0142809
ZFHX3	-0.00693981										PNKD	0.0142829
MYO1D	-0.00693788										PIP5K1C	0.0142878
TMEM241	-0.0069357										MAPK8	0.0142987
EZR	-0.0069351										UBE2V2	0.0143206
SAR1B	-0.00692572										NDRG3	0.0143256
TCFL5	-0.00692345										CCDC104	0.0143447
GBP3	-0.00692121										PEX11B	0.0143454
SLC35F5	-0.00692098										MTX2	0.0143507
DCAF5	-0.00691844										LOC283070	0.0143722
0	-0.00691482										PDZD4	0.0143728
MAP7	-0.00691465										SSX2IP	0.0143952
RHBDF2	-0.00691408										PKIA	0.0143986
MDM2	-0.00690999										SH3BGRL2	0.0144067
SYNCRIP	-0.00690865										TM2D3	0.0144116
TYROBP	-0.00690694										SHANK2	0.0144195
RND2	-0.00690674										ENSA	0.014421
SLC25A37	-0.00690494										GOLGA8A /// GOLGA8B /// LOC101930583	0.0144216
0	-0.00690293										MCTP1	0.0144223
TMEM260	-0.00689999										ASTN1	0.0144524
CTBP1-AS2	-0.00689962										SMIM13	0.0144707
CPM	-0.00689859										RAPGEF2	0.0144761
PLXNB3	-0.00689452										GRIA1	0.0144774
TTC14	-0.00689438										MAGED1	0.0145229
AMER2	-0.00689237										DLGAP2	0.0145404
AGO3	-0.00688925										CA10	0.0145713
KMT2E	-0.00688521										ADAM11	0.0145846
WDR11	-0.00688386										FAM216A	0.0145942
CPEB4	-0.0068823										BEX2	0.014595
SPTBN1	-0.00688209										RAN	0.0145998
0	-0.00687837										CACNA1A /// LOC100507353	0.0146017
MED13	-0.0068783										RAPH1	0.0146105
CD44	-0.0068756										C14orf2	0.0146152
RBM17	-0.00687465										KIAA1217	0.014622
CAB39L	-0.0068741										FAM220A	0.0146289
LINC01354	-0.00686742										HARS /// LOC101928623	0.0146563
YIPF6	-0.00686618										FBLL1	0.0146718
TGFBR3	-0.00686373										ARHGAP44	0.0146801
SOX2	-0.00686356										PREPL	0.0146819
JMJD1C	-0.00686226										CLTB	0.0146822
NKAIN4	-0.00686194										MRPL15	0.0146899
HLA-J	-0.00686178										CLIP3	0.0146961
HLA-F	-0.00685883										TRIM9	0.0146978
GRN	-0.0068463										MAST3	0.014703
YY1	-0.00684338										RBFOX1	0.0147099
FEZ1	-0.00684254										KIAA1467	0.0147117
0	-0.00684247										TUSC3	0.0147253
GNAI2	-0.00684069										ATP6V1D	0.0147294
WDFY2	-0.00683867										PELI3	0.0147562
0	-0.00683372										LYSMD2	0.0147702
RP11-466P24.7	-0.00683206										AK5	0.0147918
HIST2H2AA3 /// HIST2H2AA4	-0.00682588										EID2	0.0147933
LDLRAP1	-0.00682535										FGF9	0.0148074
KCNJ10	-0.00682297										TMOD2	0.0148148
HEY2	-0.00682159										ANKRD46	0.0148296
RPS16	-0.0068215										GUCY1A2	0.0148389
0	-0.0068203										0	0.0148395
SCAF11	-0.00681918										ATP6V1E1	0.0148405
NFKBIZ	-0.00681784										PTPRT	0.0148462
H2AFJ	-0.00681779										SEPT6	0.0148568
HYPK /// MIR1282 /// SERF2	-0.00681712										PART1	0.0148672
PRDX6	-0.00681711										TOLLIP	0.0148743
ONECUT2	-0.00681559										ARPC5L	0.0149078
ANKRD36B	-0.0068144										HOOK1	0.0149138
PRPF40A	-0.00681426										RAB40C	0.0149151
TSC22D4	-0.00681207										TPD52	0.0149164
CSF1	-0.00681082										PGM2L1	0.0149192
EML2	-0.00681023										AAK1	0.0149313
MRVI1	-0.00680844										RNF175	0.0149483
GPIHBP1	-0.00680701										TMEM246	0.0149523
ZNF287	-0.0068042										NOVA1	0.0149568
SEMA6A	-0.00680312										KIAA0430	0.0149689
ASRGL1	-0.0068008										AKAP12	0.0149801
SNTB1	-0.00678855										PITPNM3	0.0149856
TUBB6	-0.00678305										CADM2	0.0149985
NPAS3	-0.00678267										TRHDE	0.0150002
CCDC163P	-0.00678238										TCEA2	0.0150065
SFT2D1	-0.00678235										FAM134A	0.0150145
SLC2A1	-0.00677388										LINC00599 /// MIR124-1	0.0150177
RAB10	-0.00676793										ATP13A2	0.015043
TRIOBP	-0.00676749										BCAP29	0.0150529
CTNNA1	-0.00676636										PHACTR1	0.0150683
0	-0.00676199										PPM1H	0.0150704
ZFP36L2	-0.0067612										VDAC1	0.0150777
0	-0.00675983										ST6GALNAC5	0.0150839
LOC102724275	-0.00675974										BRINP1	0.0150973
TRIM65	-0.00675966										NUDT4 /// NUDT4P1 /// NUDT4P2	0.015099
RPS6	-0.00675954										CPNE4	0.015106
ATF7IP	-0.00675938										NALCN	0.0151079
FAM115A /// LOC100294033	-0.00675663										ISCA1	0.0151164
RRBP1	-0.00675649										OGDHL	0.015144
DCBLD2	-0.00675595										UBE2E2	0.0151506
ONECUT2	-0.00675482										KIFC2	0.0151546
FUT7	-0.00675208										SEC23A	0.0151562
TAOK1	-0.00675139										NEUROD6	0.0151607
TBC1D12	-0.00674575										COL5A2	0.0151641
PCBP2	-0.00674268										CSRNP3	0.0151761
FTL	-0.00673778										SLC9A6	0.015189
POLH	-0.00673523										XK	0.015192
CNN3	-0.00673315										ST8SIA3	0.0152011
EFCAB14	-0.00673283										HOMER1	0.0152184
CXCL2	-0.00673193										JAZF1	0.0152236
PON2	-0.00671703										STXBP6	0.0152305
PAX6	-0.00671701										NGEF	0.015234
NIPAL3	-0.00671629										HLF	0.0152764
KLHL5	-0.0067151										UBLCP1	0.0152891
SERPINA1	-0.00671496										NDUFAF4	0.0153005
PPAPDC1A	-0.0067115										TSPAN5	0.0153031
TLN1	-0.00670879										SCAMP5	0.0153192
PFKP	-0.00669948										ROCK2	0.0153613
USP54	-0.00669818										PKNOX2	0.0153781
0	-0.00669686										FAM49B	0.0154065
SRRM1	-0.00669535										DPY19L1	0.0154551
FAM222A	-0.00669364										FAM13A	0.0154791
MN1	-0.00669168										WDR47	0.0154951
ZAK	-0.00668999										PSD3	0.0154988
C10orf54	-0.00668685										DYNC1LI1	0.0155152
FBXW4	-0.00668597										KCNAB2	0.0155196
TCF7L2	-0.00668592										CNST	0.0155387
ST13	-0.00668416										KITLG	0.0155398
AGT	-0.00668409										WASF1	0.0155449
MAGT1	-0.0066829										DDX1	0.0155492
LINC00674	-0.00668251										AK6 /// TAF9	0.0155552
ELAVL1	-0.00667344										GFOD1	0.0155558
LRP10	-0.0066733										FIBP	0.0155653
SOX2-OT	-0.00667279										DMTN	0.0155831
CFLAR	-0.00667249										SLC20A1	0.0155955
0	-0.006671										FKBP1B	0.0156091
SRPX	-0.00666986										KIAA2022	0.0156314
ALDH7A1	-0.00666664										PBX1	0.0156518
0	-0.00666657										CCDC85A	0.0156811
MIR6748 /// TMEM179B	-0.00666333										STAT4	0.0156874
SLCO1A2	-0.00666242										SNORA29 /// TCP1	0.0157176
LDLRAD3	-0.0066617										CAMK2N2	0.0157183
FOLR1	-0.00666073										C11orf58	0.0157377
MT1F	-0.00666005										RBP4	0.0157405
CNTNAP4	-0.00665675										FOCAD	0.0157552
MIR4745 /// PTBP1	-0.00665351										PPFIA4	0.0157583
RBMXL1	-0.00664959										NDRG3	0.0157598
ANP32A	-0.00664879										HSPA12A	0.0157741
TNC	-0.00664284										TIMM17A	0.0157945
0	-0.00664275										PLEKHM3	0.0157967
ANO6	-0.0066377										LOC101060373 /// NOMO1 /// NOMO2 /// NOMO3	0.0157968
TUG1	-0.00663751										STX1B	0.0158084
CFLAR	-0.00663734										CNTN1	0.0158192
ZNF106	-0.00663444										STMN3	0.0158362
TIPARP	-0.00663413										APBA2	0.0158459
FYN	-0.00663396										PDS5B	0.0158545
AZGP1	-0.00663303										BAG4	0.0158569
EPAS1	-0.00663287										KCNJ4	0.0158714
RXRA	-0.00663058										C1orf216	0.0159173
TPPP3	-0.00663044										UGCG	0.0159202
0	-0.00662611										KLC1	0.0159431
GJA1	-0.00662356										REEP1	0.0159648
ITPR2	-0.00661718										TMEM246	0.0159663
GIMAP4	-0.00661585										JAKMIP1	0.0159888
AASS	-0.00661353										CACNA2D3	0.0160131
RPL13 /// SNORD68	-0.00661316										TMEM35	0.0160531
APOL3	-0.00661266										PCSK1N	0.016055
RPS19	-0.00660756										FRY	0.0160595
RAMP1	-0.00660685										MYO5A	0.0160696
0	-0.00660672										MIR600 /// MIR600HG	0.0160719
MCM7	-0.00660552										RAPH1	0.0160763
CEP350	-0.00660434										VPS35	0.0160823
NET1	-0.00660065										SGSM1	0.0160841
DGKH	-0.00659849										OXR1	0.0161236
EMP3	-0.00659454										MIAT	0.0161249
FCER1G	-0.0065945										PLD3	0.0161326
CD3EAP	-0.00659321										RBFOX3	0.0161348
SORT1	-0.00658934										CDC42	0.0161513
DUSP1	-0.00658869										CHML	0.0161806
ZMAT3	-0.00658725										CAMK2A	0.0161852
0	-0.00658244										CXCL14	0.0161946
S100A11	-0.00657886										THRB	0.0162173
0	-0.00657674										PWAR6	0.0162298
DCUN1D1	-0.00657612										PANX1	0.016262
UACA	-0.00657398										RABGAP1L	0.0162781
IFNGR1	-0.00657319										SUCLA2	0.0162818
LOC100506548 /// RPL37	-0.00657289										RASA1	0.0162985
BCL6	-0.00657012										PDXP /// SH3BP1	0.0163198
DIXDC1	-0.00656782										BCL11A	0.0163268
TMEM176A	-0.00656748										GOLGA8A	0.0163273
TMED10	-0.00656536										GSK3B	0.0163296
LINC00263	-0.00656371										CAMK2B	0.0163355
0	-0.00656254										TMEM70	0.0163388
0	-0.00656246										PRKCB	0.0163563
TGIF1	-0.00656133										RAB2A	0.0163681
SEPT8	-0.00655843										PCDHA1 /// PCDHA10 /// PCDHA11 /// PCDHA12 /// PCDHA13 /// PCDHA2 /// PCDHA3 /// PCDHA4 /// PCDHA5 /// PCDHA6 /// PCDHA7 /// PCDHA8 /// PCDHA9 /// PCDHAC1 /// PCDHAC2	0.0163871
MBD4	-0.00655275										EPB41L1	0.0163888
RP3-522P13.2	-0.00655212										DZIP1	0.0163901
GPR6	-0.00655173										RIMS2	0.0164274
TSPAN6	-0.00654888										YWHAB	0.0164333
NUFIP2	-0.00654858										UBE2N	0.016445
AKR1C3	-0.0065485										FBXO9	0.0164456
C3AR1	-0.00654297										CCDC3	0.0164602
TAGLN2	-0.00653742										KCND3	0.0164828
RPS5	-0.00653741										LMO4	0.0165149
MIR612 /// NEAT1	-0.00653413										NRXN3	0.0165306
CDK12	-0.0065299										KCNQ3	0.0165307
YAP1	-0.00652985										B3GNT1	0.0165431
FADS1 /// MIR1908	-0.00652601										ATP6V1D	0.0165506
ST6GALNAC3	-0.00652463										PCMT1	0.0165523
KIAA1147	-0.00651781										THY1	0.0165725
SPTLC3	-0.00651202										STEAP2	0.0165761
DPYSL3	-0.00651051										ANKMY2	0.0165769
TMBIM6	-0.00650998										COPS4	0.0165825
FKBP5	-0.00650786										ERLEC1	0.0166539
STRIP2	-0.00650325										KCNJ6	0.0166593
SAMD9L	-0.00650288										TTBK2	0.0166769
ARHGAP30	-0.00649949										CELF2	0.0166809
RPS11	-0.00649906										VSTM2L	0.0166877
0	-0.00649808										LRFN5	0.0166945
0	-0.00649675										MIAT	0.0167001
RAB31	-0.00649455										GDPD1	0.0167048
LPCAT2	-0.00649241										PSMA5	0.0167063
TOB1	-0.00649193										NTRK3	0.0167128
REEP3	-0.00649119										EHBP1	0.0167422
ZBTB20	-0.00648985										TIAM2	0.016762
0	-0.00648786										KIAA1045	0.0167681
PRELP	-0.00648393										APBA1	0.0167691
YAP1	-0.00647898										KCND3	0.0167787
CREB5 /// LOC401317	-0.00647859										TMEM14A	0.0168012
MACF1	-0.00647655										ARPC5L	0.0168121
DDO	-0.00647594										CCDC6	0.0168186
SLCO1A2	-0.00647341										FAM155A	0.0168636
ITGB4	-0.0064733										EGR3	0.0168712
EIF4B	-0.00647299										VAMP1	0.0168796
BAZ2B	-0.00646944										PRKAG2-AS1	0.0169039
QDPR	-0.00646936										ATP2B2	0.0169098
NPIPB15	-0.00646749										ITSN1	0.0169307
SRSF5	-0.00646191										CAMK2G	0.0169724
0	-0.00646186										WASL	0.0170063
PELI1	-0.00646091										0	0.0170086
TLE4	-0.00645884										ARF3	0.0170122
H2AFJ	-0.00645332										HS3ST4	0.0170191
APOD	-0.00645193										FLRT3	0.0170202
PICALM	-0.00645146										RNF41	0.0170258
GJB1	-0.00645004										UNC80	0.0170685
EFEMP2	-0.00644927										VSTM2A	0.017103
TEX261	-0.00644635										UBE2V2	0.0171212
0	-0.00644516										ARFGEF2	0.0171222
0	-0.00644516										CAB39	0.0171239
0	-0.00644434										EPM2AIP1	0.0171835
CLCA4	-0.00644268										INPP4A	0.0172019
KDM4B	-0.00644143										MKL2	0.0172245
SDC4	-0.00644104										OPTN	0.0172325
ADD1	-0.00644029										PVALB	0.0172392
PLEK	-0.00644006										LMTK2	0.0172734
GNA13	-0.00643969										NDFIP1	0.0173086
MCM7	-0.00643955										RNF187	0.0173101
SLC7A11	-0.00643916										SSX2IP	0.0173259
0	-0.0064373										BEX1	0.0173446
0	-0.00643562										GRIA2	0.0173486
FDFT1	-0.00643384										PLXNA1	0.0173488
ENOSF1	-0.00643244										RIMS1	0.0173571
DLG1	-0.00643099										C9orf91	0.0173632
CYP27A1	-0.00643079										CITED2	0.0173664
IQCC	-0.00643061										MOAP1	0.0173761
PHKA1	-0.00642881										TPRG1L	0.0173933
C1orf162	-0.0064248										GABRA1	0.0174025
MEIS2	-0.00642218										PGBD5	0.0174032
SLC25A37	-0.00642104										REPS2	0.017411
APBB1IP	-0.00641533										C2CD5	0.0174198
CT45A1 /// CT45A2 /// CT45A3 /// CT45A4 /// CT45A5 /// CT45A6 /// LOC101060211 /// LOC102723631 /// LOC102723680 /// LOC102723737	-0.00640921										DOK6	0.0174342
DTNA	-0.00640046										GABRD	0.0174526
TRAM1	-0.00639602										TMEM178A	0.01751
TPP1	-0.00639432										VPS36	0.0175131
CDK18	-0.00639094										CHN1	0.0175146
0	-0.00639072										NDFIP2	0.0175363
TIMP1	-0.00639034										SYP	0.0175397
SLC12A2	-0.00638841										KIFAP3	0.0175563
0	-0.00638599										HLF	0.0175704
NOS1	-0.00638355										SLC25A46	0.0175957
SH3PXD2A	-0.00637888										PCSK2	0.0176221
SERPINB6	-0.00637882										AAK1	0.017624
KRCC1	-0.00637854										RGMB	0.017656
CDKN1C	-0.00637679										DCAF6	0.0176613
RGS5	-0.00637665										FAM49A	0.0176689
PLD1	-0.00637499										LPCAT4	0.0176725
FGFR1	-0.00637417										FAIM2	0.0176793
LOC101927305	-0.00637068										SYNGR1	0.0176901
0	-0.00636798										LOC728392	0.0177012
GNAO1	-0.00636732										DNAJB14	0.0177115
ZNF445	-0.00636656										SYTL2	0.0177255
0	-0.00636503										LOC100507547 /// PRRT1	0.0177433
ARPC1B	-0.00636441										CISD1	0.0177678
UBE2H	-0.0063638										LINC01128	0.0177762
FBXO7	-0.0063632										NSG1	0.0177788
RPS2 /// SNORA64	-0.00636032										UBE2K	0.017782
QKI	-0.00635939										BTBD10	0.0177866
KTN1	-0.00635747										CHST1	0.0178
ANGPT2	-0.00635676										PCNXL2	0.0178208
ACTA2	-0.00635451										PCDHA1 /// PCDHA10 /// PCDHA11 /// PCDHA12 /// PCDHA13 /// PCDHA2 /// PCDHA3 /// PCDHA4 /// PCDHA5 /// PCDHA6 /// PCDHA7 /// PCDHA8 /// PCDHA9 /// PCDHAC1 /// PCDHAC2	0.017873
QKI	-0.00635287										ARPC5L	0.0179167
SAMD4B	-0.00635038										NEFL	0.0179213
AIF1L	-0.00634522										CYFIP2	0.0179393
LTBP1	-0.00634445										PDK3	0.0179415
BST2	-0.00634166										SCG5	0.017961
PRICKLE1	-0.00633892										BBS7	0.0180064
SLCO2B1	-0.00633845										NAP1L3	0.0180198
PIK3C2A	-0.00633802										PIK3CB	0.0180334
POLK	-0.00633756										AHI1	0.0180471
ARL17A /// ARL17B /// LOC100294341	-0.00633325										CERS6	0.0180506
0	-0.00633113										AP2M1	0.0180638
C10orf128	-0.00632238										LOC285812	0.0180725
AGPAT3	-0.00632126										YPEL5	0.0180847
MYOF	-0.006314										PACSIN1	0.0180894
CFHR2	-0.00631381										INPP4A	0.0180974
PRLR	-0.00631164										SAMD12	0.0181062
RPL38	-0.0063084										B4GALT6	0.0181181
SLC44A2	-0.00630318										RUNDC3A	0.0181303
MPST	-0.00630217										FAM153A /// FAM153B /// FAM153C /// LOC100507387 /// LOC101928349 /// LOC101930363	0.0181505
FCGR3B	-0.00629717										CDK14	0.0181516
UFL1	-0.00629655										CYP4X1	0.0181861
DNAJC1	-0.0062962										GABRG2	0.0181923
TMEM63A	-0.00629428										MAP7D2	0.0182402
IL6ST	-0.006291										SEZ6L2	0.0182529
LOC91548	-0.00629022										CAMKK2	0.0182532
SCARB2	-0.00628865										KSR2	0.0182636
KLF4	-0.00628609										MPC2	0.0182651
0	-0.00628538										CSMD1	0.018277
STARD8	-0.00628059										CPLX1	0.0183462
IQGAP1	-0.00627986										ENO2	0.0183569
SF3B1	-0.00627611										ZNF25	0.0183814
0	-0.00627608										CXCL14	0.0183874
0	-0.00627607										GPD1L	0.0183925
GATAD1	-0.00627418										CAMK2B	0.018396
ARHGEF10	-0.00627301										DPP6	0.0183982
ICAM2	-0.00627234										HS6ST3	0.0184422
PLCD1	-0.00627226										CCDC136	0.0184498
ATP2A2	-0.00627221										PKP4	0.018456
RHOBTB3	-0.00626916										SRGAP3	0.0184807
GIGYF2	-0.00626692										G3BP2	0.0185149
RHOC	-0.006263										CAP2	0.0185173
KANSL1	-0.00626297										PRICKLE1	0.0185592
0	-0.00626268										CNKSR2	0.018567
FLNB	-0.0062618										MAP3K9	0.0185783
PECAM1	-0.00625999										CERS6	0.0185798
LINC00266-1	-0.00625757										NME1	0.0186066
SERBP1	-0.00625755										SERPINF1	0.0186134
FABP2	-0.00625523										THY1	0.0186158
PLCL2	-0.0062547										CHD5	0.0186167
MOB1A	-0.00625325										FXYD7	0.0186314
MRC2	-0.00624713										PTPRN2	0.0186785
0	-0.00624084										ITFG1	0.0186891
0	-0.0062396										BMPR2	0.018701
C1orf27	-0.00623764										SLC25A12	0.0187112
GPSM2	-0.0062356										ARHGEF9	0.0187173
TMPRSS15	-0.00623515										SCN3B	0.0187337
MT2A	-0.00623409										STRBP	0.0187342
ITGAM	-0.00623248										CD200	0.0187395
EMX2	-0.00623248										TBC1D24	0.0187535
TIMM8A	-0.00622658										LMO4	0.0187655
LOC100131564	-0.00621754										BAI3	0.0187776
0	-0.00621752										ITPR1	0.0187851
KCNN3	-0.00621736										PNMA3	0.0187911
GNG5	-0.00621636										LIN7A	0.0187981
ACER3	-0.00621269										LRRC8B	0.0188064
LOC102725022	-0.00621177										ACSL6	0.0188609
NAV2	-0.0062101										ATP1A1	0.0188743
AXL	-0.00620908										SCN2B	0.0189098
MIIP	-0.00620842										SGTB	0.018926
ITGA5	-0.00620614										KRAS	0.0189315
TRIOBP	-0.00620535										CAMK2G	0.0189591
DDX17	-0.00620489										FAM217B	0.0189888
0	-0.00620254										KIF3C	0.018992
USH1C	-0.00620236										FAM84A	0.0190143
MME	-0.00620229										SSX2IP	0.0190281
STAG2	-0.00620022										FAM13A	0.0190428
PHAX	-0.00620017										SLITRK5	0.0190463
GBP2	-0.00619982										FBXW7	0.0190534
SLC44A1	-0.00619981										EFR3A	0.0190707
FGF2	-0.00619866										ARPP21	0.0190778
SAT1	-0.00619765										VDAC3	0.0191033
0	-0.00619712										OIP5-AS1	0.0191035
PERP	-0.00619361										PHYHIP	0.0191259
SNAP23	-0.00619243										KCNA2	0.0191604
0	-0.00619158										SNCA	0.0191796
GTPBP3	-0.00619066										SLITRK4	0.0191932
HERC5	-0.0061879										CPLX2	0.019252
0	-0.00618745										CACNA2D1	0.019252
GCLC	-0.00618678										TMEM178B	0.0192624
GNAL	-0.00618569										JPH3	0.0192693
0	-0.00618408										PTK2B	0.0192873
PSEN1	-0.00618336										GRM5	0.019311
FAM84B	-0.00618328										ELOVL4	0.0193287
MYO1C	-0.00618313										PDE4A	0.0193684
KDM2A	-0.0061822										ENC1	0.0193694
MDM4	-0.00617952										PCLO	0.0193723
LMNA	-0.00617715										BASP1	0.0193758
ITGA2	-0.00617571										ATP2B1	0.0193895
LOC102724441 /// LOC102724951 /// LOC389831	-0.00617515										MAP2K1	0.0193901
TMEM50A	-0.00617427										TUB	0.0194104
ARHGAP21	-0.00617416										LYNX1	0.0194123
C5orf63	-0.00617348										PRKCE	0.0194616
PNRC1	-0.00617284										DPY19L2P2	0.0194665
SLC45A3	-0.00617265										RCAN2	0.0194848
MKNK2	-0.00616668										MPPED1	0.0194913
C18orf54	-0.00616578										HPCAL1	0.0195255
SORBS1	-0.00616548										CNTNAP2	0.0195261
SET /// SETP4 /// SETSIP	-0.00616189										STAMBPL1	0.0195518
RPL38	-0.00616095										RASGEF1A	0.0195616
OPALIN	-0.00615538										SCG3	0.0195806
ATP11A	-0.00615291										NDRG4	0.0195818
MS4A6A	-0.00614564										TTC7B	0.019585
GATA6-AS1	-0.0061456										KIF3A	0.0195998
CBX5	-0.00614112										PAIP1	0.019652
MARCKS	-0.00614026										GLRB	0.0196693
DYNLT1	-0.00613644										MIR124-2HG	0.0196775
SPTLC2	-0.00613135										GDAP1	0.0196815
MPHOSPH8	-0.00612815										ITPR1	0.0196984
CTSC	-0.00612271										KCNJ9	0.0197183
PLOD2	-0.00612138										SEH1L	0.019741
0	-0.00612043										MICU3	0.019762
LILRB3	-0.00611617										ATP2B1	0.0197748
IQCA1	-0.00611602										GPR158	0.0197985
LOC101928378	-0.00611439										ZFPM2	0.0198012
0	-0.0061135										SSX2IP	0.0198057
TWF1	-0.00611106										KCNJ6	0.0198356
0	-0.00610892										PRDM2	0.0198521
METTL7A	-0.0061054										SCN8A	0.0198578
LBR	-0.00610215										ADCY1	0.0198857
LOC101928589 /// TMEM164	-0.00610152										ATPAF1	0.0198901
PTGDS	-0.00609993										ARHGEF7	0.0199007
MAP7	-0.0060995										C3orf80	0.0199057
DLX6	-0.00609928										LZTFL1	0.0199103
FAM120C	-0.00609749										FRRS1L	0.0199395
SHC4	-0.00609457										DYNC1I1	0.0199462
SPAG9	-0.00608991										EFR3A	0.0199872
UBE2D3	-0.00608761										COX7B	0.0200092
MEGF10	-0.00608639										PSD3	0.0200211
GUSBP4 /// LOC100653061	-0.00608521										ARL4C	0.0200475
CHST6	-0.00608375										PNMA2	0.0200622
EEF1G /// MIR3654	-0.00608331										SATB1	0.020077
ALDH7A1	-0.00608318										SVOP	0.0201247
MSI2	-0.0060815										SLC16A14	0.020143
CCNE2	-0.00608106										PPP3CA	0.0201602
TMEM144	-0.00607899										PAIP1	0.0201662
LOC100507520	-0.00607804										RAB3A	0.0202266
IPW /// LOC101930404 /// PWARSN /// SNORD107 /// SNORD115-13 /// SNORD115-26 /// SNORD115-7 /// SNORD116-22 /// SNORD116-28 /// SNORD116-4 /// SNRPN	-0.00607228										CADPS2	0.0202491
0	-0.00606986										LY6H	0.0202504
0	-0.00606929										ITPR1	0.0203032
S1PR5	-0.00606863										SYNJ1	0.0203101
BAZ1A	-0.00606763										SEZ6L2	0.0203211
H3F3A /// H3F3AP4 /// H3F3B	-0.00606679										LRRFIP1	0.0203714
FYB	-0.00606619										GNAS	0.0203805
NT5DC1	-0.00606563										DOCK3	0.0203951
SHROOM1	-0.0060652										PRKAR2B	0.0203984
PTP4A2	-0.00606267										PPM1E	0.0204436
SECISBP2	-0.00605697										MAPK9	0.0204865
CFLAR	-0.00605691										FAM102B	0.0204967
0	-0.00605597										AP3B2	0.0205302
GLUD1	-0.00605329										GABRA5	0.0206003
BEST1	-0.00605068										IGSF21	0.0206039
0	-0.00605019										NLK	0.020606
CARNS1	-0.00604789										IQSEC1	0.0206453
B3GNT5	-0.0060449										0	0.0206484
0	-0.00604478										SYT16	0.020653
LOC101928826 /// TPT1	-0.0060438										MYH10	0.0206541
EFHC1	-0.00604362										RIMBP2	0.0206643
SLC44A2	-0.00604315										CACNA1B	0.0206676
DDR2	-0.00603699										SERPINI1	0.0206889
IFI16	-0.00603521										PFKP	0.0207237
LOC102724561	-0.00603404										CDH18	0.0207555
HIST2H2AA3 /// HIST2H2AA4	-0.00603268										TESPA1	0.0207796
0	-0.00603192										NRSN1	0.0208197
SEC11A	-0.0060268										EPHB6	0.020841
MT1HL1	-0.00602659										EFHD2	0.0208457
NES	-0.00602577										INPP5F	0.020847
CNTNAP3 /// CNTNAP3B /// CNTNAP3P2	-0.00602408										RASGRF2	0.0208536
PLCL1	-0.00602262										GABRB3	0.0208939
ATF3	-0.00601989										MKRN1	0.020898
RPL11	-0.00601956										NAPG	0.0209151
EMX2OS	-0.0060157										ZYG11B	0.0209182
CHN2	-0.00601554										LONRF2	0.020944
0	-0.00601281										FGF13	0.0209664
PAWR	-0.00601262										CUX2	0.0210259
SNORD50A /// SNORD50B	-0.00601136										SNAP25	0.0210555
ATP6	-0.00600869										C2orf80	0.0211312
P2RX5 /// P2RX5-TAX1BP3 /// TAX1BP3	-0.00600669										CNR1	0.0211432
FBXO30	-0.00600644										TPM3	0.0211529
BSPRY	-0.00600619										PLCXD2	0.0212087
DSE	-0.00600562										CAMK2B	0.0212181
GNA12	-0.00600487										MDH1	0.0212595
SF3B1	-0.00600347										TAGLN3	0.0212796
RREB1	-0.00600338										MICAL2	0.0212831
BGN	-0.00600332										SLC25A12	0.0213555
0	-0.00600114										NIPAL2	0.0213564
0	-0.00599962										ATP8A2	0.0214149
SOX2	-0.00599805										ATP6V1H	0.021434
EPRS	-0.00599749										SNX10	0.0214408
CSNK1A1	-0.00599672										SYBU	0.0214514
S100A16	-0.0059931										HTR2A	0.0214763
MAP3K1	-0.00599052										HPCAL4	0.021481
EZR	-0.00598882										CDK5R1	0.0214916
ATF7IP	-0.00598817										SMYD2	0.0215096
SLC47A2	-0.00598686										FAM3C	0.0215164
SF1	-0.00598503										AFF3	0.0215341
IFI27	-0.00598414										ARHGEF3	0.0215374
DENND5A	-0.0059791										PSMD12	0.0215672
RP3-406A7.7	-0.0059791										PPP3CB	0.0216137
ASCC1	-0.00597884										MAPK9	0.021641
COMT	-0.00597603										SCAI	0.0216649
ANKRD36	-0.00597405										HOPX	0.0216682
NECAP2	-0.00596979										PARM1	0.0216822
C4orf3	-0.00596966										MAP2K4	0.021715
DYSF	-0.00596823										PCSK2	0.0217475
OTUD7B	-0.00596502										FAM19A2	0.0218362
0	-0.00596476										PPM1L	0.0218387
DNAJB1	-0.00596153										RP11-127B20.2	0.0218538
SPSB1	-0.00596151										KCNB1	0.0219166
0	-0.00596121										GOT1	0.0219238
ALAD	-0.0059596										STXBP5L	0.021935
FGFR1OP2	-0.0059591										SV2A	0.0219384
SYTL4	-0.00595865										NRXN1	0.0219763
0	-0.00595791										CDH10	0.0219936
ADAMTS18	-0.00595652										NRGN	0.0220014
0	-0.00595601										HTR2A	0.0220423
LRRC10B	-0.00595452										GUCY1B3	0.0220582
MTHFD2	-0.00594937										PLK2	0.0220647
LOC101930059 /// LOC102724250 /// NBPF1 /// NBPF11 /// NBPF15	-0.00594385										FAM126B	0.0221343
HSBP1	-0.00594196										KCNQ2	0.022142
CD81	-0.00594114										EEF1A2	0.0222166
RPL30	-0.00593973										CHL1	0.0222337
GLTSCR2	-0.0059393										CALM1 /// CALM2 /// CALM3	0.0222653
0	-0.00593903										SLC2A13	0.022268
SMEK1	-0.00593883										ASNS	0.022298
0	-0.00593751										NUAK1	0.0223503
ARRDC3	-0.00593749										SCN3B	0.0223781
SPOCK3	-0.00593728										COPG2IT1	0.0223847
RGS10	-0.00593402										CNTN3	0.022394
VAMP5	-0.00593256										NECAP1	0.0224283
PIK3C2A	-0.00592816										FAM19A1	0.0224737
PHF10	-0.0059268										RYR2	0.0224952
0	-0.0059201										ATP2A2	0.0225226
SNX5	-0.00591553										AACS	0.0225461
VPS13C	-0.00591493										ELMOD1 /// LOC643923	0.0225471
ABCB1 /// ABCB4	-0.00591448										CHRM1	0.0225513
ALOX5AP	-0.0059092										PLCB1	0.0225563
RBMS3	-0.00590909										DMXL2	0.0225704
HHIP	-0.00590876										HLF	0.0225949
LRP6	-0.00590625										KLC1	0.0226096
POLR2J	-0.00590444										LSM11	0.0226494
0	-0.00590407										GRIN2A	0.022662
FGFR3	-0.00590227										RNF130	0.0227036
0	-0.00590202										THRB	0.0227069
PAWR	-0.00589922										LMO4	0.0227258
KIAA1033	-0.00589785										CACNB2	0.022741
LOC101930421	-0.00589779										TSPAN13	0.0228088
CHI3L2	-0.005897										BSN	0.0228488
DOHH	-0.0058964										ADAM23	0.0228941
0	-0.00589361										TENM2	0.0229287
0	-0.00589214										RAB6B	0.0229288
RPS15A	-0.00589027										ADAM22	0.0229783
AFF1	-0.00588933										C16orf45	0.0229935
0	-0.00588722										ATP6V1A	0.0230074
BCAP29	-0.00588656										SSBP3	0.0230218
ARSD	-0.00588375										OPN3	0.0230571
FAM107A	-0.00588227										RAP1GAP2	0.0231095
LILRB3	-0.00587998										ENTPD4	0.0231165
ECM2	-0.00587932										BSCL2 /// HNRNPUL2-BSCL2	0.0231259
LOC100505912	-0.00587801										GAP43	0.0231394
0	-0.00587645										CNRIP1	0.0231432
NPL	-0.00587523										ARMCX5-GPRASP2 /// GPRASP2	0.023225
QSER1	-0.00587516										ZNF204P	0.0232504
UBTD2	-0.00587395										SUB1	0.0232596
0	-0.00587381										WDR7	0.023315
0	-0.00587294										EHD3	0.0233409
RPL13A /// SNORD32A /// SNORD33 /// SNORD34 /// SNORD35A	-0.00587092										PDE1A	0.0233832
CLEC2B	-0.00586973										TRIM37	0.023427
U2SURP	-0.0058658										NPTXR	0.0234344
RPL13 /// SNORD68	-0.00586462										NBEA	0.023465
NQO1	-0.00586156										AAK1	0.0234733
0	-0.00585926										GRIA4	0.0235739
0	-0.00585926										ATRNL1	0.0236004
0	-0.00585476										DIRAS1	0.0236922
SPAG8	-0.00584953										PGM2L1	0.023733
CXCL16	-0.00584689										PNMAL2	0.0237645
NEBL	-0.00584512										DNM1	0.023818
GRAMD3	-0.00584399										NCEH1	0.023856
KCNIP2-AS1	-0.00584273										MLLT11	0.0238805
SLCO3A1	-0.00584082										HAPLN4	0.0239736
ZNF326	-0.00584053										KCNIP4	0.0240878
SCNN1A	-0.00583969										BEND6	0.0241225
CHURC1-FNTB /// FNTB	-0.00583954										STXBP1	0.0242113
SERBP1	-0.00583954										NEGR1	0.0242626
FTH1	-0.00583426										SHC3	0.0242629
COL18A1	-0.00582876										TBC1D9	0.0242953
CTNNB1	-0.00582758										THY1	0.0243172
0	-0.00582707										GABRB3	0.0243621
0	-0.00582683										LNX1	0.0244097
TGFBR3	-0.00582515										FBXW7	0.0244152
TFRC	-0.00582054										SLC12A5	0.0244601
RPS19	-0.0058187										AK5	0.024461
TRA2A	-0.00581586										KIAA1211L	0.0244763
CREB5 /// LOC401317	-0.00581356										NPTX1	0.0245418
ANKRD13A	-0.00581277										GRIA3	0.0245828
ANGPT2	-0.00580708										GPM6A	0.024663
SLA	-0.00580682										ATP2B2	0.0247025
AHCYL1	-0.00580605										GNG3	0.0247397
SLC26A2	-0.00580432										SYT4	0.0247677
CA12	-0.00580293										PNMA6A	0.0247818
SOX6	-0.00580199										CHRM3	0.0248285
VAMP8	-0.00580147										UCHL1	0.0248721
SH2D3A	-0.00579048										LOC285147	0.0249042
0	-0.00579035										DCLK1	0.0249606
FOXO4	-0.00578694										HECW1	0.0250804
0	-0.00578625										PCDH8	0.025097
HIPK2	-0.00578315										KALRN	0.0251037
SLC11A1	-0.00578301										R3HDM1	0.0251046
IKZF2	-0.00578056										ATP1A3 /// LOC101927137	0.0251413
CYP2B6	-0.00578028										ADRBK2	0.0251487
HOXD1	-0.00578009										SLC39A10	0.0252121
MLLT10	-0.00577944										IPCEF1	0.0252386
CAV1	-0.00577878										ATP6V1G2	0.0252422
0	-0.00577843										CACNG3	0.025254
ITSN1	-0.00577803										CRYM	0.0252688
SLITRK6	-0.00577372										CALY	0.0253532
0	-0.00577275										NREP	0.0254522
FRG1 /// FRG1B /// LOC100134091 /// LOC100289097 /// LOC101930278 /// LOC101930531 /// LOC102724923	-0.00576794										ARHGAP26	0.0255771
PNPT1	-0.00576691										RORB	0.0256137
OR7A5	-0.00576552										TMEM151B	0.0256222
BNIP3L	-0.00576491										PI4KA	0.0256741
KIF20B	-0.00576476										TMEM155	0.0256922
ACTL6A	-0.0057639										RBFOX1	0.0257398
LTF	-0.00576363										RTN1	0.025798
0	-0.00576358										STX1A	0.0258127
DNAJC4	-0.00576042										KIAA0513	0.0258175
DPH5	-0.00576012										RALYL	0.025886
SNX15	-0.00575657										ACOT7	0.0259088
LPAR6	-0.00575548										DCLK1	0.0259348
0	-0.00575417										KCNMA1	0.0260408
CD59	-0.00574763										PCSK1	0.0260939
TWSG1	-0.00574747										GLS	0.0261141
RPS16	-0.00574667										GPRASP1	0.0261159
EDN1	-0.00574647										SLITRK4	0.0261584
TLE4	-0.00574498										OXR1	0.0262786
CREB3L2	-0.00574441										VSTM2A	0.0262837
RPS10L	-0.00574336										RGS4	0.0262873
NOTCH2	-0.00574299										ADD2	0.026349
0	-0.00574053										RGS7	0.0264564
WSB1	-0.00573376										ERC2	0.0265226
CMTM6	-0.0057329										ZNF365	0.0265397
INPP5D	-0.00573259										SYNGR3	0.0265429
UBA6	-0.00573031										NRXN1	0.0265651
0	-0.00572987										FXYD6	0.0265819
SOS1	-0.00572953										YWHAH	0.0265913
GPNMB	-0.00572895										MYT1L	0.0265966
ITGB5	-0.00572884										PRKAR1B	0.0266207
EFCAB14	-0.00572772										CAMTA1	0.0266364
CPOX	-0.00572751										SCN1A	0.0266757
DDIT4L	-0.00572466										C1orf115	0.0266889
MTURN	-0.00572432										LOC283070	0.0266946
PAPOLA	-0.00572238										HPRT1	0.0267094
RDX	-0.00572091										ERICH3	0.026852
RAD51L3-RFFL /// RFFL	-0.00572042										CDC42	0.0268596
CLN8	-0.00571922										GABBR2	0.0268711
SOCS3	-0.00571753										GLS	0.0270678
ARHGEF6	-0.00571734										CABP1	0.0271288
ARHGAP27	-0.00571478										GAP43	0.0271684
CD14	-0.00571424										L1CAM	0.0271751
JAM3	-0.0057131										ATP6V1B2	0.0271875
RGS3	-0.00570784										OPCML	0.0272221
0	-0.00570728										NAPB	0.0273059
0	-0.00570728										GNG2	0.0273087
PPAP2A	-0.00570676										PDE1A	0.0273118
HEPACAM /// HEPN1	-0.00570398										KALRN	0.0273955
LOC101928826 /// TPT1	-0.00570393										NAP1L2	0.0274435
0	-0.00570386										LOC101930324 /// NSF	0.0274582
RIN2	-0.00570302										MAPK10	0.0275179
0	-0.00570227										PAK1	0.0276071
0	-0.00570227										CKMT1A /// CKMT1B	0.0276886
AHCYL1	-0.00570198										SYN2	0.0277096
KRT8P12	-0.0057011										CHGA	0.0277265
CD164	-0.00570069										SULT4A1	0.0277928
HIGD1B	-0.00569943										ATRNL1	0.0278584
0	-0.00569892										RFPL1S	0.0279137
HSPA6	-0.00569866										CLSTN2	0.0280544
[truncated: 42,830 more rows]

## Sheet: Unbalanced process 2
	unbalanced process 2										1918 transcripts are affected by unbalanced process 2 (i.e. were assigned G2>0.01 or G2<-0.01)
Gene Symbol	Gi2										Gene Symbol	Gi0
0	-0.0275864										0	-0.0275864
0	-0.0275864										0	-0.0275864
0	-0.0259299										0	-0.0259299
0	-0.0259299										0	-0.0259299
0	-0.0253791										0	-0.0253791
0	-0.0253791										0	-0.0253791
0	-0.0253453										0	-0.0253453
0	-0.0253453										0	-0.0253453
0	-0.0249834										0	-0.0249834
0	-0.0249834										0	-0.0249834
0	-0.0244274										0	-0.0244274
0	-0.0244274										0	-0.0244274
0	-0.0237716										0	-0.0237716
0	-0.0237716										0	-0.0237716
0	-0.0231712										0	-0.0231712
0	-0.0231712										0	-0.0231712
0	-0.0214785										0	-0.0214785
0	-0.0214785										0	-0.0214785
0	-0.0213341										0	-0.0213341
0	-0.0213341										0	-0.0213341
0	-0.0212398										0	-0.0212398
0	-0.0212398										0	-0.0212398
CABP1	-0.0198637										CABP1	-0.0198637
0	-0.018623										0	-0.018623
SEPT9	-0.018421										SEPT9	-0.018421
MED16	-0.0180439										MED16	-0.0180439
CAPN3	-0.0172327										CAPN3	-0.0172327
MKNK2	-0.0169944										MKNK2	-0.0169944
ZMIZ2	-0.0169511										ZMIZ2	-0.0169511
FAM21A /// FAM21C /// LOC101930591	-0.0169242										FAM21A /// FAM21C /// LOC101930591	-0.0169242
LINC00599 /// MIR124-1	-0.0168928										LINC00599 /// MIR124-1	-0.0168928
0	-0.0167986										0	-0.0167986
0	-0.0167986										0	-0.0167986
TNS1	-0.0166948										TNS1	-0.0166948
AAK1	-0.0165786										AAK1	-0.0165786
MAST4	-0.0165123										MAST4	-0.0165123
PPFIBP1	-0.0164006										PPFIBP1	-0.0164006
ARMCX6	-0.0163398										ARMCX6	-0.0163398
0	-0.0159792										0	-0.0159792
0	-0.0159792										0	-0.0159792
AHI1	-0.0159309										AHI1	-0.0159309
ZCCHC24	-0.0157811										ZCCHC24	-0.0157811
SEMA4C	-0.0155731										SEMA4C	-0.0155731
SAFB2	-0.0154368										SAFB2	-0.0154368
KDM4B	-0.0154355										KDM4B	-0.0154355
0	-0.0154091										0	-0.0154091
0	-0.0154091										0	-0.0154091
CTTN	-0.0154066										CTTN	-0.0154066
NOSIP	-0.0153212										NOSIP	-0.0153212
EDF1	-0.0152886										EDF1	-0.0152886
PECAM1	-0.0152767										PECAM1	-0.0152767
SIDT2	-0.0152025										SIDT2	-0.0152025
CNP	-0.0149968										CNP	-0.0149968
EEF1D	-0.0149048										EEF1D	-0.0149048
PTPRS	-0.0148356										PTPRS	-0.0148356
VAMP1	-0.0147846										VAMP1	-0.0147846
GAS2L1	-0.0147359										GAS2L1	-0.0147359
0	-0.0146537										0	-0.0146537
0	-0.0146537										0	-0.0146537
GOLGA8N	-0.0145907										GOLGA8N	-0.0145907
STOML1	-0.0144807										STOML1	-0.0144807
PTPRK	-0.0143935										PTPRK	-0.0143935
SFPQ	-0.0143497										SFPQ	-0.0143497
ZNF302	-0.0143387										ZNF302	-0.0143387
ACACB	-0.014309										ACACB	-0.014309
PHF1	-0.0141775										PHF1	-0.0141775
MCF2L	-0.014172										MCF2L	-0.014172
TFRC	-0.0140805										TFRC	-0.0140805
MEG3	-0.0140041										MEG3	-0.0140041
HIP1R	-0.013964										HIP1R	-0.013964
APOLD1	-0.0139351										APOLD1	-0.0139351
C4A /// C4B /// C4B_2	-0.0139091										C4A /// C4B /// C4B_2	-0.0139091
CSMD1	-0.0139031										CSMD1	-0.0139031
LOC101060275 /// LOC101929910 /// LOC613037 /// NPIPA5 /// NPIPB11 /// NPIPB3 /// NPIPB4 /// NPIPB5	-0.0138943										LOC101060275 /// LOC101929910 /// LOC613037 /// NPIPA5 /// NPIPB11 /// NPIPB3 /// NPIPB4 /// NPIPB5	-0.0138943
0	-0.0138495										0	-0.0138495
0	-0.0138495										0	-0.0138495
PCNXL2	-0.0138293										PCNXL2	-0.0138293
GLTSCR2 /// SNORD23	-0.0137813										GLTSCR2 /// SNORD23	-0.0137813
SNW1	-0.0137718										SNW1	-0.0137718
CXCL14	-0.0137635										CXCL14	-0.0137635
MAFF	-0.0137491										MAFF	-0.0137491
HSBP1	-0.0136617										HSBP1	-0.0136617
TF	-0.0135903										TF	-0.0135903
TCF7L2	-0.0135485										TCF7L2	-0.0135485
SSR1	-0.0134381										SSR1	-0.0134381
LPAR1	-0.0134105										LPAR1	-0.0134105
P2RX5-TAX1BP3 /// TAX1BP3	-0.0133384										P2RX5-TAX1BP3 /// TAX1BP3	-0.0133384
KIFC2	-0.0133175										KIFC2	-0.0133175
USP48	-0.0132919										USP48	-0.0132919
IPCEF1	-0.0132522										IPCEF1	-0.0132522
TAF11	-0.0132086										TAF11	-0.0132086
CACNA1A /// LOC100507353	-0.0132										CACNA1A /// LOC100507353	-0.0132
SNORA29 /// TCP1	-0.0131202										SNORA29 /// TCP1	-0.0131202
0	-0.0130759										0	-0.0130759
0	-0.0130759										0	-0.0130759
TPM1	-0.0130134										TPM1	-0.0130134
NDUFS6	-0.0129997										NDUFS6	-0.0129997
MICAL2	-0.0129205										MICAL2	-0.0129205
RAB3A	-0.0128788										RAB3A	-0.0128788
NFIC	-0.0127971										NFIC	-0.0127971
SRSF1	-0.0127806										SRSF1	-0.0127806
AKT3	-0.0127213										AKT3	-0.0127213
AKR7A2	-0.0127177										AKR7A2	-0.0127177
CHMP4A /// TM9SF1	-0.0127										CHMP4A /// TM9SF1	-0.0127
FAM208A	-0.0126873										FAM208A	-0.0126873
IFITM1	-0.0126505										IFITM1	-0.0126505
MIR7703 /// PSME2	-0.0126457										MIR7703 /// PSME2	-0.0126457
CYTH3	-0.012644										CYTH3	-0.012644
TMEM151B	-0.0126321										TMEM151B	-0.0126321
CARS	-0.0126296										CARS	-0.0126296
NAA60	-0.0126238										NAA60	-0.0126238
LOC100288778 /// LOC101930154 /// MIR6859-1 /// MIR6859-2 /// WASH1 /// WASH2P /// WASH3P /// WASH7P	-0.0126018										LOC100288778 /// LOC101930154 /// MIR6859-1 /// MIR6859-2 /// WASH1 /// WASH2P /// WASH3P /// WASH7P	-0.0126018
COL6A1	-0.0125809										COL6A1	-0.0125809
FAM134A	-0.0125618										FAM134A	-0.0125618
MAPK8IP3	-0.0125252										MAPK8IP3	-0.0125252
VARS2	-0.0125081										VARS2	-0.0125081
MAP4	-0.0124299										MAP4	-0.0124299
NUAK1	-0.012416										NUAK1	-0.012416
SLC25A12	-0.0124076										SLC25A12	-0.0124076
S100A8	-0.0123461										S100A8	-0.0123461
HIP1R	-0.0123455										HIP1R	-0.0123455
NDUFB8	-0.0123433										NDUFB8	-0.0123433
ATP5I	-0.012334										ATP5I	-0.012334
BOLA2 /// BOLA2B	-0.0123254										BOLA2 /// BOLA2B	-0.0123254
PTGR2 /// ZNF410	-0.012304										PTGR2 /// ZNF410	-0.012304
LAMP1	-0.0122982										LAMP1	-0.0122982
NOTCH2NL	-0.0122377										NOTCH2NL	-0.0122377
FGFR1OP	-0.0122047										FGFR1OP	-0.0122047
N4BP2L2	-0.0122034										N4BP2L2	-0.0122034
RAB13	-0.0121996										RAB13	-0.0121996
UROD	-0.0121948										UROD	-0.0121948
STAT2	-0.012158										STAT2	-0.012158
CNOT2	-0.0120796										CNOT2	-0.0120796
SPATA2L	-0.0120724										SPATA2L	-0.0120724
RPL14	-0.0120676										RPL14	-0.0120676
COL5A3	-0.0119974										COL5A3	-0.0119974
SLC2A3	-0.0119833										SLC2A3	-0.0119833
DUSP22	-0.0119764										DUSP22	-0.0119764
CD59	-0.0119699										CD59	-0.0119699
ROMO1	-0.0118769										ROMO1	-0.0118769
0	-0.0118684										0	-0.0118684
0	-0.0118684										0	-0.0118684
BUB3	-0.0118528										BUB3	-0.0118528
CERS1 /// GDF1	-0.0118376										CERS1 /// GDF1	-0.0118376
NDUFA11	-0.0118015										NDUFA11	-0.0118015
C4orf48	-0.0117659										C4orf48	-0.0117659
0	-0.0117417										0	-0.0117417
0	-0.0117417										0	-0.0117417
ACACB	-0.011739										ACACB	-0.011739
RTN2	-0.0117143										RTN2	-0.0117143
CHD5	-0.0117086										CHD5	-0.0117086
MAL	-0.0116803										MAL	-0.0116803
DEGS1	-0.0116664										DEGS1	-0.0116664
ANAPC4	-0.0116662										ANAPC4	-0.0116662
ATP5I	-0.0116606										ATP5I	-0.0116606
RBM22	-0.0116396										RBM22	-0.0116396
ITSN2	-0.0116325										ITSN2	-0.0116325
PLEKHM1	-0.0116254										PLEKHM1	-0.0116254
SFN	-0.011623										SFN	-0.011623
UBAP2	-0.0116218										UBAP2	-0.0116218
REPIN1	-0.0116212										REPIN1	-0.0116212
NUP43	-0.0116133										NUP43	-0.0116133
0	-0.0115725										0	-0.0115725
0	-0.0115725										0	-0.0115725
COPB1	-0.0115281										COPB1	-0.0115281
ZNF444	-0.0115235										ZNF444	-0.0115235
PLA2G4C	-0.0115153										PLA2G4C	-0.0115153
CSNK1G2	-0.0115073										CSNK1G2	-0.0115073
NREP	-0.0114678										NREP	-0.0114678
PAQR6	-0.0114547										PAQR6	-0.0114547
SRGAP3	-0.0114336										SRGAP3	-0.0114336
SRRT	-0.0113986										SRRT	-0.0113986
GNA11	-0.0113846										GNA11	-0.0113846
CLTB	-0.0113225										CLTB	-0.0113225
CLUH	-0.0113139										CLUH	-0.0113139
ETFB	-0.0113103										ETFB	-0.0113103
SLC35E1	-0.0113085										SLC35E1	-0.0113085
WWOX	-0.0113036										WWOX	-0.0113036
ACTG1P4 /// AMY1A /// AMY1B /// AMY1C /// AMY2A /// AMY2B	-0.0112735										ACTG1P4 /// AMY1A /// AMY1B /// AMY1C /// AMY2A /// AMY2B	-0.0112735
ALG13	-0.0112615										ALG13	-0.0112615
RORB	-0.0112585										RORB	-0.0112585
SLC6A8	-0.011256										SLC6A8	-0.011256
RPL23AP32	-0.0112393										RPL23AP32	-0.0112393
GBAP1	-0.0112306										GBAP1	-0.0112306
KLHDC10	-0.0111899										KLHDC10	-0.0111899
GPR56	-0.0111742										GPR56	-0.0111742
CTSB	-0.0111588										CTSB	-0.0111588
TMEFF2	-0.0111425										TMEFF2	-0.0111425
GADD45B	-0.0111415										GADD45B	-0.0111415
GNB5	-0.011141										GNB5	-0.011141
GAK	-0.0111338										GAK	-0.0111338
0	-0.0111238										0	-0.0111238
HS3ST4	-0.0111123										HS3ST4	-0.0111123
MT3	-0.0111066										MT3	-0.0111066
ICAM2	-0.0111036										ICAM2	-0.0111036
FDFT1	-0.0111033										FDFT1	-0.0111033
HAPLN4	-0.0111028										HAPLN4	-0.0111028
MAST2	-0.0110969										MAST2	-0.0110969
MIR6872 /// SEMA3B	-0.0110874										MIR6872 /// SEMA3B	-0.0110874
PLLP	-0.0110814										PLLP	-0.0110814
PELI3	-0.0110743										PELI3	-0.0110743
LOC101929857 /// SLX1A-SULT1A3 /// SLX1B-SULT1A4 /// SULT1A3 /// SULT1A4	-0.0110575										LOC101929857 /// SLX1A-SULT1A3 /// SLX1B-SULT1A4 /// SULT1A3 /// SULT1A4	-0.0110575
MBD3	-0.0110384										MBD3	-0.0110384
WWP2	-0.0110325										WWP2	-0.0110325
CTSH	-0.01101										CTSH	-0.01101
DGCR2	-0.0109808										DGCR2	-0.0109808
MNT	-0.0109514										MNT	-0.0109514
S100A13	-0.0109446										S100A13	-0.0109446
VPS4A	-0.0109443										VPS4A	-0.0109443
FAHD2A	-0.0109343										FAHD2A	-0.0109343
UNC5A	-0.0109225										UNC5A	-0.0109225
YBX3	-0.0109223										YBX3	-0.0109223
ZNF580	-0.0109126										ZNF580	-0.0109126
NCAM1	-0.0109074										NCAM1	-0.0109074
OPHN1	-0.0108893										OPHN1	-0.0108893
ADAP1	-0.0108889										ADAP1	-0.0108889
TALDO1	-0.0108867										TALDO1	-0.0108867
CDK10	-0.010852										CDK10	-0.010852
CES2	-0.0108494										CES2	-0.0108494
NLN	-0.0108483										NLN	-0.0108483
BTN3A2 /// BTN3A3	-0.0108462										BTN3A2 /// BTN3A3	-0.0108462
RNF114	-0.010838										RNF114	-0.010838
TNXA /// TNXB	-0.0108372										TNXA /// TNXB	-0.0108372
PDXK	-0.0108253										PDXK	-0.0108253
PSMD4	-0.0108247										PSMD4	-0.0108247
RPL24	-0.0108189										RPL24	-0.0108189
TCTN2	-0.0107936										TCTN2	-0.0107936
GRIK5	-0.0107633										GRIK5	-0.0107633
NGB	-0.0107573										NGB	-0.0107573
XPNPEP1	-0.0107258										XPNPEP1	-0.0107258
0	-0.0107115										0	-0.0107115
0	-0.0107115										0	-0.0107115
KATNB1	-0.0106861										KATNB1	-0.0106861
CCNL2	-0.0106503										CCNL2	-0.0106503
0	-0.010624										0	-0.010624
KIAA0930	-0.010604										KIAA0930	-0.010604
MCL1	-0.0105894										MCL1	-0.0105894
EXOC7	-0.0105848										EXOC7	-0.0105848
EFEMP2	-0.0105734										EFEMP2	-0.0105734
MT1H	-0.0105595										MT1H	-0.0105595
CROCCP2	-0.0105456										CROCCP2	-0.0105456
KLC1	-0.0105123										KLC1	-0.0105123
TNXA /// TNXB	-0.0105087										TNXA /// TNXB	-0.0105087
JAM3	-0.0104872										JAM3	-0.0104872
SYNM	-0.0104749										SYNM	-0.0104749
NDUFA3	-0.0104605										NDUFA3	-0.0104605
MZF1	-0.0104511										MZF1	-0.0104511
RAP1GAP2	-0.0104462										RAP1GAP2	-0.0104462
PCGF2	-0.0104439										PCGF2	-0.0104439
ATP2B2	-0.0104261										ATP2B2	-0.0104261
TCF4	-0.0104114										TCF4	-0.0104114
SF3A2	-0.0104051										SF3A2	-0.0104051
SPTAN1	-0.0103776										SPTAN1	-0.0103776
SF3A2	-0.0103546										SF3A2	-0.0103546
ANP32B	-0.0103199										ANP32B	-0.0103199
DCTN2	-0.0103185										DCTN2	-0.0103185
ZNF43 /// ZNF729	-0.0103119										ZNF43 /// ZNF729	-0.0103119
0	-0.0103022										0	-0.0103022
ROBO3	-0.0103017										ROBO3	-0.0103017
MIR6716 /// PHLDB1	-0.01029										MIR6716 /// PHLDB1	-0.01029
SYNDIG1	-0.0102869										SYNDIG1	-0.0102869
IFRD1	-0.0102494										IFRD1	-0.0102494
SGSM3	-0.0102487										SGSM3	-0.0102487
AACS	-0.0102428										AACS	-0.0102428
MIAT	-0.0102386										MIAT	-0.0102386
RPL12	-0.0102295										RPL12	-0.0102295
APBA2	-0.010227										APBA2	-0.010227
FLT1	-0.0102176										FLT1	-0.0102176
LOC100288778 /// LOC101930154 /// MIR6859-1 /// MIR6859-2 /// WASH1 /// WASH2P /// WASH3P /// WASH7P	-0.0102039										LOC100288778 /// LOC101930154 /// MIR6859-1 /// MIR6859-2 /// WASH1 /// WASH2P /// WASH3P /// WASH7P	-0.0102039
DAZAP2	-0.0102006										DAZAP2	-0.0102006
TM2D1	-0.0102005										TM2D1	-0.0102005
MT1HL1	-0.0101958										MT1HL1	-0.0101958
WIPI2	-0.0101946										WIPI2	-0.0101946
MT1F	-0.0101905										MT1F	-0.0101905
SFXN1	-0.0101858										SFXN1	-0.0101858
NR1D1 /// THRA	-0.0101754										NR1D1 /// THRA	-0.0101754
COBL	-0.0101725										COBL	-0.0101725
0	-0.0101545										0	-0.0101545
SERPINB6	-0.0101527										SERPINB6	-0.0101527
OFD1	-0.0101481										OFD1	-0.0101481
MAP3K4	-0.0101455										MAP3K4	-0.0101455
PQLC1	-0.0101444										PQLC1	-0.0101444
SAC3D1	-0.0101362										SAC3D1	-0.0101362
COL16A1	-0.0101284										COL16A1	-0.0101284
PDZD4	-0.0101207										PDZD4	-0.0101207
CRAT	-0.0101166										CRAT	-0.0101166
CAMK2N2	-0.0101084										CAMK2N2	-0.0101084
PPDPF	-0.0101052										PPDPF	-0.0101052
MAN2A2	-0.0101051										MAN2A2	-0.0101051
SCN1B	-0.0100867										SCN1B	-0.0100867
LYRM1	-0.0100634										LYRM1	-0.0100634
CCDC64	-0.0100509										CCDC64	-0.0100509
TFE3	-0.0100476										TFE3	-0.0100476
KCNJ9	-0.0100425										KCNJ9	-0.0100425
MIR6840 /// PILRB /// STAG3L5P-PVRIG2P-PILRB	-0.0100374										MIR6840 /// PILRB /// STAG3L5P-PVRIG2P-PILRB	-0.0100374
R3HCC1	-0.0100243										R3HCC1	-0.0100243
TCEB2	-0.0100161										TCEB2	-0.0100161
NDUFA2	-0.0100062										NDUFA2	-0.0100062
GNS	-0.00999714										METAP2	0.0100007
TMEM258	-0.00999128										TNKS2	0.0100119
G6PC3	-0.00998676										ANKRD12	0.0100175
RALGAPA1	-0.00998665										CLCN4	0.0100326
MOBP	-0.00997678										ACP1	0.0100446
PI4KB	-0.00997631										KIFC2	0.0100452
MT1X	-0.00997558										CALB1	0.0100597
DIP2C	-0.00996547										UBR5	0.0100664
DENR	-0.00996521										PIK3C2A	0.0100675
FRG1B	-0.00995594										RCOR3	0.010069
TBC1D4	-0.00994531										ACER3	0.0100705
C7orf55-LUC7L2 /// LUC7L2	-0.00994508										NASP /// NASP	0.0100709
LUZP1	-0.00994335										GTDC1	0.0100745
ATP6V0E1	-0.00994142										PTN	0.0100785
MAST4	-0.00991727										LRPPRC	0.0100999
PBXIP1	-0.00990908										YWHAB	0.0101001
RPS7	-0.00989986										TAOK1	0.0101025
HBB	-0.00989902										KIAA0100	0.0101073
PFKFB3	-0.00989731										UBXN4	0.0101273
ABCC10	-0.00988382										RP11-138A9.1	0.0101326
LAMTOR4	-0.00988008										OGT	0.0101327
ZFYVE16	-0.00987402										FGF12	0.0101363
MIR3656 /// TRAPPC4	-0.00986913										RUNX1T1	0.0101425
SNRNP70	-0.00986847										ABCA1	0.0101449
ABCA3	-0.00986761										DCLK1	0.0101526
ZNF358	-0.00986552										DNAJA1	0.0101552
FAM35A	-0.00985095										0	0.0101579
SPSB3	-0.00985057										JUND	0.0101614
HBB	-0.00984313										KLF3-AS1	0.0101645
MRPS18B	-0.00982092										ARL5A /// LOC101929356	0.0101659
FBXO9	-0.00979778										SIAE	0.01017
ATP5E	-0.00979455										TMED8	0.0101735
RPS29	-0.00979178										PROX1	0.0101795
GALNT16	-0.00978451										LOC100507577 /// LONP2	0.0101826
SYF2	-0.00977554										GXYLT2	0.0102046
KARS	-0.00977264										RAB8B	0.0102081
MCAM	-0.00976515										ARF3	0.0102108
PCDH9	-0.0097399										ALDH6A1	0.010222
ZDHHC11	-0.00972208										0	0.010223
GSS	-0.00971294										RABGAP1L	0.0102297
0	-0.00971026										USP34	0.0102308
0	-0.00971026										NPAS3	0.0102378
RPS10	-0.00970532										OGDH	0.0102397
PPM1F	-0.00970054										CAMKK2	0.0102432
VAMP3	-0.00969769										NAA35	0.0102443
RAB31	-0.00968791										CIAO1	0.0102498
0	-0.00968771										TBC1D5	0.0102501
ATOX1	-0.00967498										0	0.0102523
CLU	-0.00966287										RBM5	0.0102525
SLC25A29	-0.00966031										BCLAF1	0.0102567
ADAM11	-0.00965862										PNRC2	0.0102574
MAPK11	-0.00964817										PDXP /// SH3BP1	0.0102605
SCD5	-0.00964319										POLR2K	0.0102621
RBM6	-0.00963612										RBBP4	0.0102834
0	-0.00962898										AP5M1	0.0102896
ERCC1	-0.0096114										DNAJC12	0.010292
EFS	-0.00960961										FARSA	0.0102981
EPB41L2	-0.00960735										SCOC	0.0102991
KCNMA1	-0.0096043										DNAJA4	0.0103009
TPCN1	-0.00959713										RNU86 /// RPL3 /// SNORD83B	0.0103049
MAP4	-0.00957487										DTNBP1	0.0103051
VWF	-0.00957152										DUSP3	0.0103122
LSS	-0.00956322										EPB41L3	0.0103175
WIPF1	-0.00955823										UBE4B	0.0103263
MAN1A2	-0.00955448										PLEKHA5	0.010329
CNDP2	-0.00954902										USP14	0.0103331
RPSA /// RPSAP19 /// RPSAP58 /// RPSAP9 /// SNORA6 /// SNORA62	-0.00954669										KIAA2026	0.0103362
PRPF4B	-0.0095447										CNTNAP2	0.0103394
KIAA0232	-0.00954286										LAMP1	0.0103413
VDAC3	-0.00952476										0	0.0103461
C9orf91	-0.00952428										SRSF11	0.0103464
KIAA1598	-0.00952265										DGKH	0.0103534
KIAA1462	-0.00951659										0	0.010357
TACC2	-0.00951138										UBL3	0.0103586
MT1M	-0.00950792										VTA1	0.0103617
MT1F	-0.00949734										HMOX2	0.0103794
EZH1	-0.00949631										RBMS1	0.010381
ABCA8	-0.0094896										FMNL2	0.0103838
KCNC3	-0.00948846										C19orf12	0.0103847
BC070363 /// RP11-108M9.4	-0.00945597										SPAG9	0.0103865
LOC100996792 /// MAP2K3	-0.00945424										GRAMD3	0.0103925
RPL36	-0.00944928										HSDL2	0.010393
MAPKBP1	-0.0094466										POLR2J	0.0103936
PLEKHH1	-0.00944454										PPP1R9B	0.0104043
MRPL49	-0.00943205										ZNF148	0.0104088
TNXA /// TNXB	-0.00943032										RP11-466P24.7	0.0104096
UPF3A	-0.00942908										ATP6V1C1	0.0104113
LETM1	-0.00942046										RBM22	0.0104184
ZNF595	-0.00941943										RP11-846E15.2	0.0104252
TPM2	-0.00941852										FGFR2	0.0104271
SPIRE1	-0.00941492										CSRNP3	0.0104302
IFT20	-0.00940839										EIF2S1	0.0104412
FAXDC2	-0.00940337										TRPS1	0.0104446
CPNE9	-0.00939983										PPP1R1B	0.0104476
SIK2	-0.00939829										REPS2	0.0104572
HIBCH	-0.00939487										CALY	0.0104582
C4orf46 /// TOMM7	-0.00938516										FAM174A	0.0104634
ADCY2	-0.00938471										IMPAD1	0.0104873
VOPP1	-0.00936743										TUSC3	0.0104927
ENTPD4	-0.00936557										KATNBL1	0.010498
ARFGAP1	-0.00936437										0	0.0104999
HYPK /// MIR1282 /// SERF2 /// SERF2-C15ORF63	-0.00936258										KCNN3	0.0105002
BGN	-0.00936111										GATAD2B	0.0105063
NQO2	-0.00935881										HUWE1	0.0105079
RANGAP1	-0.00935466										MAPRE1	0.0105098
GAPVD1	-0.0093524										USP14	0.0105108
MRPL57	-0.00934392										ASNA1	0.0105126
MAT2A	-0.00934058										SLC26A2	0.0105151
GGA1	-0.0093366										FAM131A	0.0105176
0	-0.00933477										GAPDH	0.0105215
NDRG1	-0.00933315										GAPDH	0.0105215
FNTA	-0.00933149										0	0.0105261
CDC16	-0.0093303										SLC25A40	0.0105283
LOC102724788 /// PRODH	-0.00931453										RAB5C	0.0105331
NISCH	-0.00930297										HSPA9	0.0105446
MT2A	-0.00929753										HTR2C	0.0105486
MADD	-0.00929612										STAU1	0.0105488
NCOR2	-0.00929502										FGFR2	0.010553
RBM15	-0.00928914										CLDND1	0.010555
TFEB	-0.0092884										SNX9	0.01056
FAM134C	-0.00927311										EID1	0.0105625
PAF1	-0.0092645										0	0.0105672
HDAC11	-0.00925387										KPNA5	0.0105673
LINC00623	-0.00925184										METTL2A /// METTL2B	0.0105692
TNR	-0.00925039										ZNF148	0.0105738
FLJ22184	-0.00924597										RAB3GAP1	0.0105779
MT1E	-0.00923364										FAM126B	0.0105794
EGLN2 /// RAB4B-EGLN2	-0.00922454										KCNN3	0.0105822
ELOVL4	-0.00922368										RBM25	0.0105859
ALDH6A1	-0.00922198										FOXO3	0.0105913
RPL38	-0.00922014										PCDH17	0.0105942
EIF3C /// EIF3CL	-0.00921925										TRAPPC8	0.0105946
DGCR8 /// MIR1306	-0.00920787										MTURN	0.0106025
CALR	-0.00920408										TNIK	0.0106031
STOM	-0.00919192										OSBPL11	0.0106044
BACE1	-0.00918331										SEMA6D	0.0106079
PNMA6A	-0.0091809										TUNAR	0.0106083
RPL27	-0.00917651										KANSL1L	0.0106087
GABBR2	-0.00917624										LAPTM5	0.0106093
ASCL1	-0.00917587										PCDHA1 /// PCDHA10 /// PCDHA11 /// PCDHA12 /// PCDHA13 /// PCDHA2 /// PCDHA3 /// PCDHA4 /// PCDHA5 /// PCDHA6 /// PCDHA7 /// PCDHA8 /// PCDHA9 /// PCDHAC1 /// PCDHAC2	0.0106196
0	-0.00917078										PTAR1	0.0106213
SLC39A6	-0.00917025										0	0.0106266
FAM134A	-0.00916783										LINC00537	0.0106282
CCPG1 /// DYX1C1-CCPG1	-0.00916045										SON	0.010638
COX11	-0.00915529										CCDC6	0.0106386
PLCG1	-0.00915154										MFF	0.0106414
NAA10	-0.00914844										CCDC88A	0.0106432
PHIP	-0.00912931										ACSL3	0.0106534
NACAD	-0.00912882										KDELR2	0.0106549
GLRX	-0.00912844										VSTM2A	0.0106559
RIOK3	-0.00912144										ID1	0.0106674
LOC101928198 /// MFAP3L	-0.00912053										MED1	0.0106688
NDUFB1	-0.00911464										ELMO2	0.0106803
HEY1	-0.0091069										EIF4G1	0.0106824
MED13L	-0.00910084										FNIP2	0.0106901
NUP133	-0.00910026										KRT222	0.0106922
GTF3A	-0.00909851										SORBS2	0.0106938
PIN4	-0.00908344										KIAA1244	0.0106979
SRSF11	-0.00906963										UBE2B	0.0107014
PKIG	-0.00906241										PPP1R9A	0.0107153
MYRF	-0.00905877										VPS35	0.0107161
TNK2	-0.00904776										CHURC1	0.0107188
FBXW12	-0.00904762										SIPA1L1	0.0107192
0	-0.00904383										DHX15	0.0107194
POLR2L	-0.00904214										HIPK2	0.0107197
PRICKLE1	-0.00903815										SEZ6L	0.0107204
0	-0.00903695										FBXO45	0.0107259
ELP3	-0.00903644										RNF14	0.0107347
TSHZ3	-0.00902484										SRGAP1	0.0107431
BANP	-0.00902357										ABL1	0.0107471
CHGA	-0.00902288										0	0.0107493
NEFH	-0.00902265										0	0.010763
SNRPG	-0.00901391										BAG5	0.0107744
ASMTL	-0.00901181										METTL14	0.0107748
FA2H	-0.00900991										PCDH10	0.0107771
VPS52	-0.00900801										GNB2	0.0107779
MRPL2	-0.00900444										CTSB	0.0107782
ARHGEF4 /// LOC101930241	-0.00900367										DKFZP761C1711	0.0107786
0	-0.00900078										SCAMP1	0.0107822
TMED9	-0.0089951										SUV420H1	0.010794
RFTN1	-0.00898733										ING3	0.0107987
ALCAM	-0.00897852										NUMA1	0.0107998
RBM10	-0.00897664										DUSP22 /// LOC100653247	0.0108012
STK24	-0.00897331										GPR27	0.0108018
MYEOV2	-0.00897139										AKAP1	0.0108162
RPS28	-0.00896411										PAK1	0.0108192
MT1G	-0.00895463										ACTB /// ACTG1	0.0108241
TAF10	-0.00895352										DNAJB6 /// TMEM135	0.0108302
SAMHD1	-0.00894127										GAS7	0.0108316
FKBP9	-0.00893352										KCNIP2	0.0108331
C2CD5	-0.00893224										ABHD2	0.010841
NOLC1	-0.0089295										C11orf87	0.010843
SCN1A	-0.00892769										PCM1	0.0108482
MYRIP	-0.00892196										TCF4	0.0108502
CEBPD	-0.00890324										LMBR1	0.0108508
0	-0.00890191										CHD4	0.010858
0	-0.00890191										NNT	0.0108596
KCNS1	-0.00889666										STRN	0.0108818
LENG8	-0.00889237										CBL	0.010884
GNG11	-0.00889222										SRSF10	0.0108896
ATP5O	-0.00888614										IDS	0.0108982
ITPK1	-0.00888099										MAP3K7	0.0109005
POLR2C	-0.00888087										AK057657 /// RP11-473I1.9	0.0109053
C14orf132	-0.00888076										TRAPPC11	0.0109058
0	-0.00887125										KCNIP4	0.010906
SGSM2	-0.0088587										ZNF331	0.0109068
ANKRD9	-0.00885207										SLC44A2	0.0109088
CUX2	-0.00885122										SYNJ1	0.0109103
NSG1	-0.00884643										EPB41L1	0.010914
HBB	-0.00884597										STX16	0.0109198
GGA1	-0.00884455										PPP2R2A	0.0109203
ATG2A	-0.00884201										USP46	0.0109245
BTBD1	-0.00883434										FAM45A /// FAM45B	0.0109246
NCOA3	-0.00883092										ACTR3	0.0109249
HEPH	-0.00882683										AKT1S1	0.0109277
RPL39	-0.00881667										XIST	0.010936
FAU	-0.00881503										FAM63B	0.0109412
PRDX6	-0.00880207										EMC4	0.010962
FGF1	-0.00879784										PUM2	0.0109648
ANKRD20A1 /// ANKRD20A2 /// ANKRD20A3 /// ANKRD20A4	-0.00878758										COCH	0.0109662
POLR2H	-0.00878176										NTRK3	0.0109777
PNISR	-0.00877848										ACTN1	0.0109819
RPS17P5 /// RPS17P5	-0.0087591										LOC102724250 /// NBPF1 /// NBPF10 /// NBPF11 /// NBPF14 /// NBPF15 /// NBPF19 /// NBPF26	0.0109958
PHYH	-0.00875695										CTNND2	0.0109964
ZNF688	-0.00875478										WIPI2	0.0109982
SLC4A8	-0.00874752										AK4 /// LOC100507855	0.0110135
THOC1	-0.00874365										NGRN	0.0110177
0	-0.00874028										BMS1P5	0.0110188
MIR6789 /// PLEKHJ1	-0.00873121										TMEM178B	0.0110303
IRAK1	-0.00872951										PCP4L1	0.0110428
MACF1	-0.00872872										NUDT21	0.0110608
N4BP2L2	-0.00872766										DNAJC1	0.0110739
MZT2B	-0.00872725										TMEM59L	0.011074
0	-0.00872675										TMEM158	0.0110827
BRD8	-0.00872422										KCNJ10	0.0110868
MIR4691 /// MIR7113 /// NDUFS8	-0.00870975										DNAJB4	0.011087
MEA1	-0.00869831										PHAX	0.0110871
RPS21	-0.00869518										GPX3	0.0110958
SFXN5	-0.00869439										HMGCR	0.011097
PHIP	-0.00868349										NEBL	0.0110991
APOL2	-0.00868219										BRD2	0.0111074
0	-0.00867847										UBE4B	0.0111089
ARMC2-AS1 /// ATP5J2	-0.00867629										CDK17	0.0111159
GNA12	-0.00866232										CCNY	0.011117
ABHD6	-0.00866227										SLC2A13	0.0111231
TRA2B	-0.00865331										TRIM23	0.0111232
MT1X	-0.0086529										CSNK1A1	0.0111242
CCDC152	-0.00864647										EIF4A1 /// LOC101928634 /// SENP3-EIF4A1 /// SNORA48 /// SNORA67 /// SNORD10	0.0111253
MAPK10	-0.00864409										NCOA1	0.0111258
CHKB-CPT1B /// CPT1B	-0.0086396										NUDT3 /// RPS10-NUDT3	0.0111261
SDHC	-0.00862991										HMP19	0.0111267
OPN3	-0.00862908										RBBP4	0.0111271
PELP1	-0.00862387										GNAQ	0.0111274
WBP1L	-0.00861993										TCF4	0.0111343
COLCA1	-0.00860693										UBE2L3	0.0111364
BTF3	-0.00860364										FOXN3	0.0111369
NFIB	-0.00860251										WAC	0.0111456
HCFC1R1	-0.00859917										GFM1	0.0111541
KRBOX4	-0.00859429										RABGAP1	0.0111658
MCF2L	-0.00859325										CLOCK	0.0111659
EMID1	-0.00858456										YIPF6	0.0111682
0	-0.00857867										SESTD1	0.0111738
0	-0.00857867										CD59	0.0111748
NUDT4 /// NUDT4P1 /// NUDT4P2	-0.00857788										NRXN1	0.0111778
0	-0.00857423										MORF4L1	0.0111779
ACAA1	-0.00857026										CHMP2B	0.0111852
TECPR1	-0.0085597										TMEM259	0.0111889
RNF182	-0.00855873										BUB3	0.0111899
TSR3	-0.00855871										PDK4	0.011197
PPM1F	-0.00855783										BLOC1S2	0.0112297
CDIPT	-0.008554										SLC4A4	0.0112339
UQCR11	-0.00855388										HSPA5	0.0112352
IGIP	-0.00854768										BZW1	0.0112357
SMARCC2	-0.00853799										RALGDS	0.011246
GABBR2	-0.00853562										CIT /// MIR1178	0.011246
IGFBP7	-0.00853486										0	0.0112522
LUZP1	-0.00853281										ETV1	0.0112603
SFN	-0.00852677										KCND3	0.0112617
STK38L	-0.00852596										DYNC1H1	0.0112697
ZNF444	-0.00852046										CCNDBP1	0.0112772
SAT1	-0.00851381										PPP1R12A	0.0112813
CCK	-0.00851322										MOB3B	0.0112881
FADS1 /// MIR1908	-0.00851174										UBE2S	0.0112884
LRP4	-0.00851013										NFIA	0.0112921
GNAZ	-0.00850572										VEZF1	0.0112925
CCDC93	-0.00850147										FGF12	0.0112989
RP4-635E18.8	-0.00850054										SRSF7	0.0112998
COX5B	-0.00850006										ACLY	0.0113018
TSPAN13	-0.0084985										MFSD6	0.0113026
TXN2	-0.00849753										TIA1	0.0113048
INTS3	-0.00849427										SRSF5	0.0113072
DNAH3	-0.00849341										SESN3	0.0113092
C17orf62	-0.00849238										PRKCE	0.0113119
GCN1L1	-0.00848836										RNF170	0.0113144
MGAT5	-0.008485										SGPP1	0.0113281
LUC7L3	-0.0084718										ATP6V0D1	0.0113325
MAP3K11	-0.00846443										ZFP36L2	0.011336
C19orf60	-0.00845363										NSFL1C	0.0113408
CSRP2	-0.00843784										GPHN	0.0113413
ILF3	-0.00842775										DMXL1	0.0113486
SAMHD1	-0.0084262										ZADH2	0.0113487
SLC44A1	-0.00842126										DDX17	0.011354
MTSS1	-0.00841966										0	0.0113761
CHERP	-0.00841853										HSPA1A /// HSPA1B	0.0113947
LOC101060321 /// LOC101060351 /// LOC101060376 /// LOC101060389 /// LOC102723859 /// LOC102724862 /// TBC1D3 /// TBC1D3C /// TBC1D3F /// TBC1D3H	-0.00841767										KIF5A	0.011414
CR936796	-0.00841378										SIPA1L2	0.0114163
RPS17	-0.00841339										GAS7	0.0114168
0	-0.00839763										JUND	0.011418
SEC16A	-0.0083964										TNRC6B	0.0114284
COX17 /// POPDC2	-0.00839635										EPRS	0.0114323
MINOS1-NBL1 /// NBL1	-0.00838672										0	0.0114338
C11orf49	-0.00838087										ATXN7	0.0114357
RAPGEF3	-0.00837024										SNAPC3	0.011442
IFI27L1	-0.00835828										SYNCRIP	0.0114605
PARP6	-0.00835686										CALM1 /// CALM2 /// CALM3	0.0114612
CAPN2	-0.0083563										RPS27	0.0114625
RPS17	-0.00834998										CLPTM1L	0.0114639
COL5A3	-0.0083416										RHOQ	0.0114674
TUBA4A	-0.00834144										NDRG4	0.0114708
SLC16A1	-0.00834004										SLC25A37	0.01149
0	-0.00833653										EIF4A1 /// LOC101928634 /// SENP3-EIF4A1 /// SNORA48 /// SNORA67 /// SNORD10	0.0114966
STAT1	-0.00832518										IGIP	0.0115139
CLDN5	-0.00832419										CBWD1 /// CBWD2 /// CBWD3 /// CBWD5 /// CBWD6 /// CBWD7 /// LOC101060578	0.0115162
HNRNPUL1	-0.00832252										NIFK	0.0115242
GGCX	-0.00831712										YWHAZ	0.0115267
GADD45B	-0.00831261										CSNK1A1	0.01153
NR3C1	-0.00830341										0	0.0115322
LOC729966 /// PDE4C	-0.00829705										0	0.0115333
NOVA1	-0.00828792										POLR2J /// POLR2J2 /// POLR2J3 /// POLR2J4 /// UPK3BL	0.0115557
0	-0.00828565										ZNF704	0.0115558
USP28	-0.00828562										PCMTD1	0.0115577
GOLGA3	-0.00828557										RPS23	0.0115599
ASPH	-0.00827656										RBM27	0.0115684
KCNMB4	-0.00827477										FADS1 /// MIR1908	0.0115715
RNF187	-0.00826534										TOLLIP	0.0115985
RPS4X	-0.00824304										SBDS /// SBDSP1	0.0115997
0	-0.00824176										AMZ2P1	0.0116145
PADI2	-0.00824017										TSC22D2	0.0116163
GPM6A	-0.00823146										CEP170 /// CEP170P1	0.0116199
LIMS2	-0.00822943										TNPO1	0.0116203
ASB13	-0.00822772										NADK2	0.0116215
REEP2	-0.00822737										MEF2C	0.011627
RPS17	-0.00822305										0	0.0116284
ABHD12	-0.00822243										TCF4	0.011629
HEPACAM /// HEPN1	-0.00821334										MARCKS	0.0116298
UBAP2L	-0.00821326										FLRT2 /// LOC100506718	0.0116338
DCX	-0.00820968										MIR1304 /// SNORA1 /// SNORA18 /// SNORA32 /// SNORA40 /// SNORA8 /// SNORD5 /// TAF1D	0.0116433
PNRC2	-0.00819159										GABRB2	0.0116445
DHCR7	-0.00818021										SRGN	0.0116716
DICER1	-0.00817679										C1QTNF4	0.011672
RAB40B	-0.00816536										PTPRF	0.01168
KCNJ4	-0.00816496										NDFIP2	0.0116814
LYPLA1	-0.00816417										ZCCHC2	0.0116858
RB1CC1	-0.00816178										AKAP1	0.0116895
CDC16	-0.0081518										CREBL2	0.0116912
SETD2	-0.00815095										RB1CC1	0.0116924
COX7A1	-0.00814764										SSX2IP	0.0116955
GYG1	-0.0081475										VAMP2	0.0116961
PIDD1	-0.00814648										CDC37	0.0117016
ARHGEF2	-0.00814075										0	0.0117053
KIAA1841	-0.00813865										PLRG1	0.0117239
KLC2	-0.00813751										RANGAP1	0.0117271
PIN4	-0.00813617										PPP6C	0.0117459
TMEM241	-0.00813357										GRSF1	0.0117559
NDUFA13	-0.00812699										GPR56	0.0117644
FUBP1	-0.00811865										ZNF770	0.0117787
PGLS	-0.00811859										UVSSA	0.0117811
MARS /// MIR6758	-0.0081141										UBXN7	0.011782
PKNOX2	-0.00811152										MAP9	0.0118106
GPC1	-0.00810684										CHN2	0.0118235
A2M	-0.0081035										RAB3C	0.0118341
0	-0.00809773										SMEK1	0.011839
TMSB10	-0.00809241										RABL6	0.0118396
JADE1	-0.00808764										ZBTB20	0.0118511
DTNA	-0.00808129										EIF5	0.0118702
LITAF	-0.00807798										ZRANB1	0.011873
TMEM241	-0.00807785										CAPRIN1	0.011892
RPLP2 /// SNORA52	-0.00807709										PCBP1	0.0119009
INSIG1	-0.00807465										ZBTB8A	0.0119081
TCEAL2	-0.00807278										TMEM50B	0.0119081
RARRES3	-0.00807047										PUM1	0.0119095
RPL37A	-0.00806905										GNAL	0.0119113
BAG1	-0.00806757										ARPC5L	0.0119177
ZNF721	-0.00806707										MRPS10	0.0119297
RPL5 /// SNORD21	-0.00806528										CD99	0.0119407
CACNG8	-0.00806249										CCNY	0.0119425
S100A1	-0.00806022										DCTN4	0.0119441
MRVI1	-0.00805933										SAMHD1	0.0119523
YES1	-0.00805637										HNRNPU	0.0119565
RPL23A	-0.00805027										UBE2D3	0.0119578
PDE4A	-0.00804988										CRIPT	0.0119581
TSNAX	-0.00804983										FLJ31306	0.0119618
SLC25A28	-0.00804668										ZSWIM6	0.0119701
EFNA1	-0.00803465										APOOL	0.011973
MET	-0.00802106										ARFGEF1	0.0119741
ZFAS1	-0.00802043										SSX2IP	0.0119913
KIAA0907	-0.00801562										MFF	0.011996
CD22	-0.00801121										FXR1	0.0119963
VPS16	-0.00800562										BAALC	0.0120039
MRPL57	-0.00800445										RPRD1A	0.0120065
LBR	-0.00800134										PCSK2	0.0120066
NDRG3	-0.00799771										PHACTR2	0.0120089
GUSB	-0.00799485										PIAS1	0.0120116
THY1	-0.00799318										TAC1	0.0120159
POLR2I	-0.00799221										PALLD	0.0120371
TIMM17A	-0.00798461										PLXNB1	0.0120412
APLNR	-0.00797497										TRIM23	0.0120531
TADA2B	-0.00797486										0	0.0120552
CUL9	-0.00797455										SLC6A8	0.0120659
CR936796	-0.00796826										PCDHGA3	0.0120798
EBP	-0.00796798										SEMA6A	0.0120805
SYNRG	-0.0079665										STON2	0.0120814
C1orf115	-0.00795866										NONO	0.012084
GORASP2	-0.00795387										AKAP12	0.0120843
MINK1	-0.00795274										FNTA	0.0120853
PAIP2B	-0.00795187										BRD7	0.0120884
PRR11	-0.00794981										PRICKLE1	0.0120915
EFR3A	-0.00794632										DNAJC18	0.0120918
SMARCA2	-0.00794517										DIO2	0.0120973
0	-0.00794386										HDGFRP3	0.0120993
SURF1	-0.00794378										GABRB3	0.0120997
KCNJ3	-0.00794295										MTDH	0.0121293
SMDT1	-0.00793576										CMIP	0.0121333
0	-0.00793401										SYNPR	0.0121363
LOC100288778 /// LOC101930154 /// LOC102723897 /// MIR6859-1 /// MIR6859-2 /// WASH1 /// WASH2P /// WASH3P /// WASH7P	-0.00792582										LANCL1	0.0121401
STX1A	-0.0079229										NBR1	0.0121422
CDK11A /// CDK11B	-0.0079228										RNF146	0.0121472
VPS9D1	-0.00792205										YPEL5	0.0121498
GLDN	-0.00792061										NRXN2	0.0121592
KRTCAP2	-0.00791952										C18orf32 /// RPL17 /// RPL17-C18orf32	0.0121613
MORC2	-0.00790669										MIR612 /// NEAT1	0.0121628
RPRD2	-0.00790145										C6orf62	0.0121631
FTSJ2	-0.00789643										SRRM2	0.0121671
ADD1	-0.00789378										SCG2	0.0121805
PSMB1	-0.00788887										MIR6741 /// PYCR2	0.0121828
CACNB1	-0.00788767										KIAA0368	0.0121996
PAPOLG	-0.00788204										TNRC6B	0.0122016
NSUN5P1	-0.00787364										MAP4K4	0.0122027
FAM219B	-0.00786816										STX16	0.0122072
ZNF160	-0.0078624										BCAP29	0.0122076
PSRC1	-0.00785907										DICER1	0.0122097
PLXDC1	-0.00785819										C6orf136	0.0122104
STAU1	-0.00785244										SPOCK3	0.0122214
PIK3CB	-0.00784921										TMBIM4	0.0122256
GPR37	-0.00784709										NLK	0.0122305
NAB1	-0.00784508										BEX4	0.0122319
MAP4	-0.00783828										DHX9	0.0122387
CEBPB	-0.00783406										SPCS2	0.0122466
RPS20 /// SNORD54	-0.00783238										RAB18	0.0122492
TSC1	-0.00783213										SERBP1	0.0122546
RECK	-0.00783147										CAMK4	0.0122642
FAM107A	-0.00782822										MRPL19	0.0122648
PRDX2	-0.00782695										PLEC	0.0122967
KDM2A	-0.00782394										0	0.0122993
SLC2A1	-0.00782027										RHOQ	0.0122999
FOXO3	-0.00782004										0	0.012302
C18orf32 /// RPL17 /// RPL17-C18orf32 /// SNORD58A /// SNORD58B /// SNORD58C	-0.00781808										RORB	0.0123049
PIN1	-0.00781771										0	0.0123077
SHC1	-0.00781715										TUG1	0.0123092
CDK18	-0.00781581										BNIP3	0.0123104
GTF3A	-0.0078122										NDRG3	0.0123146
SEC11A	-0.00781061										ANO3	0.0123297
ADO	-0.0078085										ATAD1	0.0123354
PSMB4	-0.00780661										KIAA1244	0.012344
TLK2	-0.00780612										CELF2	0.0123449
SLC16A1	-0.00780546										COPZ1	0.0123702
PINK1	-0.0078013										BPTF	0.0123771
STK3	-0.00779929										RLIM	0.0123773
SEC14L5	-0.00779647										POGK	0.0123776
NBEAL1 /// RPL12	-0.00779093										PLOD2	0.0123823
NTRK3	-0.00778984										WBP11	0.0123871
ATP13A3	-0.00778781										PPP1R2	0.0123924
0	-0.00778449										RAB4A /// SPHAR	0.012394
PHF20	-0.00778355										GHITM	0.0123998
CPTP	-0.00777608										LYRM7	0.0124048
VAMP4	-0.00777314										TSPAN5	0.0124125
MPHOSPH9	-0.00777287										RAB14	0.0124293
KIF1C	-0.00777184										CRIM1 /// LOC101929500	0.0124319
MAP1A	-0.00776756										PDIA3	0.0124321
NDUFA1	-0.00776147										ENSA	0.0124334
CDKN1C	-0.00775762										PHACTR2	0.0124396
RP3-507I15.1	-0.00775347										0	0.0124412
MCAM /// MIR6756	-0.00774321										0	0.01245
PIP4K2A	-0.00774317										UBN2	0.012452
LAMP2	-0.00774198										CALB1	0.0124559
AAK1	-0.00773923										TAF9B	0.012466
CDK19	-0.00773778										CDR1	0.0124671
APBB2	-0.00773054										SPAG9	0.012469
RPL37	-0.00772451										SIRPA	0.0124716
DDX58	-0.00772344										GRIN1	0.0124968
RBFOX2	-0.00771977										RTN3	0.0124986
FAM195B	-0.00771165										CSNK1A1	0.0125029
SEPP1	-0.00770509										SRPK2	0.0125042
LIMS1 /// LIMS3 /// LIMS3L	-0.00770143										NONO	0.0125154
FN1	-0.00769381										INPP4A	0.0125225
PHF11	-0.00769052										CERS6	0.0125408
MYH11	-0.00768841										CD200	0.0125421
ATP9B	-0.00768058										FYTTD1	0.0125461
POLR2A	-0.00768038										MFF	0.0125553
UQCRQ	-0.00767531										LYRM2	0.0125584
BOLA2 /// SMG1P2 /// SMG1P5	-0.00767508										RPN2	0.0125747
WARS	-0.00767211										GGNBP2	0.0125758
SPIRE2	-0.00766296										STRBP	0.0125806
C11orf48 /// LOC102288414	-0.00766281										SCN2A	0.0125833
SH3KBP1	-0.00766126										BCLAF1	0.0125833
0	-0.00765678										GSK3B	0.0126027
0	-0.00765678										MAPK1	0.0126104
HSPA1A /// HSPA1B	-0.00764997										STAG2	0.0126114
ATP5L	-0.00764023										CREB1	0.0126164
SFXN3	-0.00763949										RASAL2	0.0126175
COX7C	-0.00763106										CNTNAP2	0.0126189
GNPTAB	-0.00763091										0	0.0126196
CSE1L	-0.00762802										KPNB1	0.0126197
SIK3	-0.00762207										VPS13A	0.0126203
GNAS	-0.00762185										SMDT1	0.0126219
OS9	-0.00761877										DEGS1	0.0126353
TLE1	-0.00761761										KCNK1	0.0126598
RRBP1	-0.00761375										YWHAZ	0.0126641
PDDC1	-0.00761053										SMIM15	0.012669
GRK6	-0.007606										SECISBP2L	0.0126704
SLC25A14	-0.0076038										SCN2B	0.0126772
MTRR	-0.00759973										KRT222	0.0126776
ATRNL1	-0.00759962										KPNA4	0.0126843
ZNF536	-0.00759908										NECAB1	0.0126852
ACD	-0.00759756										RFTN2	0.012691
C20orf24 /// TGIF2-C20orf24	-0.00759325										TMEM9	0.0126969
MGLL	-0.00758902										SNX5	0.0127065
NEK1	-0.00758772										ADH5	0.0127189
MSMO1	-0.00758438										DUT	0.0127249
RPS9	-0.00757781										HADHA	0.0127252
MYBPC1	-0.00757735										PDLIM5	0.0127408
ARAP2 /// LOC101928667	-0.00757704										ANP32A	0.0127432
CDH2	-0.00757633										UHMK1	0.0127523
CKMT1A /// CKMT1B	-0.0075762										LHFPL3	0.0127553
SLC1A4	-0.00757536										SPOCK3	0.0127557
SLC7A1	-0.00757376										SURF4	0.0127639
SCML2	-0.0075692										CRBN	0.0127745
PANK2	-0.00756621										ARL4C	0.0127762
CERS1 /// GDF1	-0.00756405										ZNF281	0.0127833
SLC25A3	-0.00756234										PTPRD	0.0127853
GFOD1	-0.00755685										RTN4	0.0127883
POLR1B	-0.00755542										DNAJA2	0.0127914
TRIM38	-0.00755257										RBP4	0.0127965
TRIOBP	-0.00754816										ATP2B4	0.0128168
MUSTN1 /// TMEM110 /// TMEM110-MUSTN1	-0.0075464										MAPRE2	0.0128172
INPP5E	-0.00754491										HIP1	0.0128193
UCP2	-0.00754489										FAR1	0.012835
PTP4A2	-0.00754431										TMEM167A	0.012838
IGFBP3	-0.00754139										FNIP2	0.0128465
HERC6	-0.00754138										CA11	0.0128527
TRABD	-0.00753799										SLC25A37	0.0128541
LPP	-0.0075373										GABRA5	0.0128583
RPS4XP2 /// RPS4XP2	-0.00753691										MSI2	0.0128593
EBAG9	-0.00753689										ARPP21	0.0128623
DKFZP586I1420	-0.00753447										ARHGEF4 /// LOC101930241	0.0128628
SEPT11	-0.00753173										CLCN3	0.0128893
RIMS3	-0.00752894										WDR11	0.0128998
GBP2	-0.00752841										STAT3	0.0129049
CBWD1 /// CBWD2 /// CBWD3 /// CBWD5 /// CBWD6 /// CBWD7 /// LOC101060578	-0.00752467										C5orf24	0.0129064
TST	-0.00752287										H2AFY	0.0129077
AAMDC	-0.00752115										AQP1	0.0129144
RHOT1	-0.00752038										PPM1A	0.0129246
MTMR1	-0.00751841										PPM1K	0.0129268
KAZN	-0.00751806										ELAVL1	0.012928
RAD23A	-0.00751466										SNCB	0.0129367
NQO1	-0.00751101										DNM1L	0.0129374
ERCC5	-0.00751005										UBE2K	0.0129384
FADS3	-0.00749916										NAP1L5	0.012957
RP11-403P17.4	-0.00749694										DNAJC27	0.012964
0	-0.0074966										PRPF40A	0.012974
PDE8A	-0.00749654										TM9SF2	0.0129771
PSME4	-0.0074965										PPFIA2	0.0129786
NFATC2IP	-0.00749446										AK4 /// LOC100507855	0.0129873
LINC00925	-0.00749379										LYRM2	0.012989
PTPRD	-0.00748547										BRD2	0.012992
0	-0.00748471										SARNP	0.0130026
0	-0.00748471										ALDH6A1	0.0130077
SMARCA5	-0.00748241										MAPK8IP1	0.0130175
USF2	-0.00748213										PCMT1	0.0130205
NPIPA1	-0.0074807										ZNF638 /// ZNF638-IT1	0.0130225
PTTG1IP	-0.00748036										DDX17	0.0130243
ZFYVE21	-0.00747703										C17orf49 /// RNASEK /// RNASEK-C17orf49	0.0130294
LZTR1	-0.00747519										PPP2R2C	0.013033
IFI27L2	-0.00747412										KLHL8	0.0130399
NEK3	-0.0074735										DDX3X	0.0130581
COTL1	-0.00747287										PSIP1	0.0130664
CHN2	-0.00747081										COG1	0.0130725
GTPBP6	-0.00746617										AZIN1	0.0130748
FEZ2	-0.00746509										DLG1	0.0130766
AK055981 /// RP11-617F23.1	-0.00746275										CNKSR2	0.0130836
JMJD6	-0.00745913										PENK	0.0130849
TIMM44	-0.00745608										SLC38A2	0.0130903
UBE2B	-0.00745422										0	0.013093
FTH1	-0.00745406										HPCAL4	0.0131077
EI24	-0.00745335										LPHN3	0.0131094
NFE2L1	-0.00745091										SSB	0.0131181
NSUN5	-0.0074476										TNRC6A	0.0131237
FAM228B	-0.00744146										TBL1XR1	0.0131262
SYT13	-0.00744065										PNMA2	0.0131324
BGN	-0.00743833										FAM73A	0.0131382
CEP350	-0.00743733										SF3B1	0.0131672
HBA1 /// HBA2	-0.00743716										TSHZ1	0.0131774
0	-0.00743696										ALDH7A1	0.0132093
TRIM9	-0.00743656										RSL24D1	0.0132136
GSTO1	-0.00743495										STX17	0.0132179
MAP6D1	-0.00743365										SLC38A2	0.0132195
RP5-935K16.1	-0.00743247										CALM1 /// CALM2 /// CALM3	0.0132202
EEF1D	-0.00743239										ZBTB21	0.013221
KALRN	-0.00743187										FGFR3	0.0132333
DYNC2LI1	-0.00742714										TNPO2	0.0132416
OLFM1	-0.00742632										TBC1D24	0.0132478
PPP1R13B	-0.00742569										NCEH1	0.0132575
MROH7-TTC4 /// TTC4	-0.00742519										ARHGDIA	0.0132594
CHMP5	-0.00742439										TPGS2	0.0132747
RPL23A /// SNORD42A	-0.00742156										QKI	0.0132828
ATF4	-0.00741289										MOBP	0.0132832
QKI	-0.00741279										ANK3	0.0132837
EFHD2	-0.00741188										TMEM14B	0.0132853
SHMT2	-0.00741074										TMEM50B	0.0132906
IFFO1	-0.00740747										ARID1A	0.0132938
COMMD7	-0.00739959										TMEM259	0.0133031
SKP2	-0.00739889										MAPK8IP2	0.0133038
TCF3	-0.00739408										GPR155	0.0133042
CMC2	-0.00739196										PRPF40A	0.0133141
PFDN4	-0.00739004										ZBTB20	0.013324
NIPBL	-0.00738913										FGD4	0.0133302
CTSF	-0.00738347										GAS7	0.0133401
TXNL4B	-0.00737829										CDK6	0.0133408
RAB26	-0.00737525										BUB3	0.0133527
SUPV3L1	-0.00737238										FBXL16	0.013358
SH3KBP1	-0.00736906										XKR4	0.013373
EIF3L	-0.00736644										ERLEC1	0.013392
0	-0.00736385										GPI	0.0133932
PCSK2	-0.00736204										UBE2D3	0.0134004
RPL34	-0.00735812										0	0.0134049
RAB40C	-0.00735789										GSPT1	0.0134348
0	-0.00735737										MAP3K7	0.0134417
PART1	-0.00735446										0	0.0134487
POGZ	-0.00735287										JAM3	0.0134594
USE1	-0.00734736										RUFY3	0.01346
DHX32	-0.00734725										KIF5A	0.0134643
MGRN1	-0.00734694										UFM1	0.0134667
MIAT	-0.0073403										IPO7	0.0134967
AFF1	-0.0073389										SLC25A11	0.0135063
FBXL5	-0.00733304										PINK1	0.0135112
CHMP7	-0.00733114										SPOP	0.0135149
NOTCH2	-0.00732384										MBP	0.0135166
HIF1AN	-0.00732375										DNAJC21	0.0135209
BCL6	-0.0073223										ARPC4 /// ARPC4-TTLL3	0.0135283
SH3GLB2	-0.00731987										PTP4A2	0.0135332
USP7	-0.00731907										HNRNPA3	0.01354
IQSEC1	-0.00731594										TUBB4A	0.0135527
COX7A2	-0.00731075										SCN2A	0.013566
CNOT2	-0.00730834										PTGR1	0.0135685
PRICKLE4 /// TOMM6	-0.00729994										ASAP1	0.013581
KCNN1	-0.00729768										FYTTD1	0.0135899
JARID2	-0.00729573										VCAN	0.0135957
CAND2	-0.00729431										USP34	0.0135961
HSP90AA1	-0.00729361										RAB39B	0.0135971
PEBP1	-0.00729047										BCL2L2 /// BCL2L2-PABPN1 /// PABPN1	0.0136006
ZNF385A	-0.00728852										0	0.013606
GNPAT	-0.00727593										FGF1	0.0136182
RAE1	-0.00727575										YWHAH	0.0136472
PGF	-0.00727562										TAB2	0.0136576
CALD1	-0.00726135										KIDINS220	0.0136767
SLC12A7	-0.00725764										APPL1	0.0136779
TACC1	-0.00725581										SLC6A8	0.0136859
KIZ	-0.0072554										PTPN5	0.0136861
MRPL52	-0.00725246										ARMCX3	0.0136921
BIRC2	-0.00725158										TMEM260	0.0137026
MAX	-0.00725107										RBFOX1	0.013712
IQGAP1	-0.00725094										STRN	0.0137159
IL4R	-0.00725068										MARCH7	0.0137213
ST8SIA5	-0.00724512										DLC1	0.0137298
GTF3C1	-0.00724415										DNAJC15	0.0137402
CNOT8	-0.00723836										BLOC1S6	0.0137483
NANS	-0.00723465										GTF2I /// GTF2IP1 /// LOC100093631	0.0137483
AIF1L	-0.00723463										H3F3A /// H3F3B /// MIR4738	0.0137693
PRPF31	-0.00723015										GRIN1	0.0137698
LCMT1	-0.00722566										PPP1R7	0.0137817
LAS1L	-0.00722424										ID4	0.0137841
PIP4K2B	-0.00722386										SELT	0.0137993
SYNGR1	-0.00721981										DST	0.0138002
UPP1	-0.0072187										ELMOD1 /// LOC643923	0.0138071
FNBP1	-0.00721848										GMFB	0.0138071
CRTC3	-0.00721734										CALD1	0.013816
SCN8A	-0.00720862										RSBN1	0.0138208
SDHAP1 /// SDHAP2	-0.00720763										CTNNA3	0.0138241
RP11-124L9.5	-0.0072062										MCL1	0.013825
FGFR3	-0.00720543										FAR1	0.0138364
SELO	-0.00720225										SGCB	0.0138374
RPL32	-0.00719731										GRIN1	0.0138383
PRPF3	-0.00719331										MRVI1	0.0138594
GNAS	-0.00719322										PNISR	0.0138712
ERLIN2	-0.00719213										0	0.0138759
MSX1	-0.00718982										CYP51A1 /// LRRD1	0.0138792
CD47	-0.00718792										C20orf194	0.0138824
ITGAE	-0.00718658										C4orf3	0.013888
LOC728392	-0.00718041										GOT1	0.0138912
PDS5A	-0.00717908										COX11	0.0139112
BTAF1	-0.00717812										IAH1	0.0139339
S100A9	-0.00717345										USP7	0.0139412
NXN	-0.00717194										RAB3C	0.0139628
LMNA	-0.00716756										SCYL2	0.0139672
INPP5B	-0.00716371										SDAD1	0.0139783
NOL3	-0.00716274										NUDT3	0.0139984
PDXK	-0.00715763										HNRNPR	0.0139989
RAB28	-0.00715709										ATG12	0.0140021
MTX1	-0.00715679										TCEAL8	0.0140082
TDG	-0.007153										NPEPPS	0.0140111
LOC339166 /// WSCD1	-0.0071519										SNX2	0.0140112
ACSBG1	-0.00714907										SYNJ2	0.0140127
MPC1	-0.00714724										FOXO3 /// FOXO3B	0.0140154
RPL13 /// SNORD68	-0.00714114										IGF1R	0.0140373
CFDP1	-0.00713899										VCAN	0.0140442
CTBP2	-0.00713108										SYTL2	0.0140446
LOC101928061 /// SERP1	-0.00712982										YBEY	0.0140479
SORBS3	-0.00712314										CLIP3	0.0140507
MANSC1	-0.00712198										0	0.0140666
RHOBTB1	-0.00711737										G3BP2	0.0140868
MIR1292 /// NOP56 /// SNORD110 /// SNORD57 /// SNORD86	-0.00711712										KPNA3	0.0140893
GTPBP3	-0.00711313										SET /// SETSIP	0.0140988
PKP4	-0.00711211										SCARB2	0.0141119
GPSM1	-0.00711187										UBE2N	0.0141146
CBX6	-0.00711037										MAP1LC3B	0.0141183
SRSF1	-0.00710789										ARHGDIA	0.0141185
TCEAL4	-0.00710507										SERBP1	0.0141419
STK39	-0.00710363										CIRH1A	0.0141471
SH3BP5	-0.00710141										CABP1	0.0141488
RP11-4M23.7	-0.00709946										HLA-DRA	0.0141654
NFASC	-0.00709905										CHRM1	0.0141718
GRHPR	-0.0070944										RSRC2	0.0142
FTH1P5	-0.00709031										DOCK5	0.0142051
EID1	-0.00708924										BBX	0.0142234
ZNF146	-0.00708877										ARF4	0.0142379
OCIAD1	-0.0070877										RAB3IP	0.0142396
TLN2	-0.00708568										DDX3X	0.0142526
ARHGAP1	-0.0070778										NDFIP2	0.0142891
RPL23A /// SNORD42A	-0.00707584										UBE2L3	0.0142985
RMDN3	-0.00706528										MAP3K7	0.0143161
SHROOM1	-0.00706513										SNCA	0.0143171
GRAMD1B	-0.00706077										KDELR2	0.0143233
CASP2	-0.0070592										DTNA	0.0143247
CFH /// CFHR1	-0.00705646										0	0.0143307
RP11-127B20.2	-0.00705396										DTNA	0.0143344
RAB33B	-0.00704755										MSANTD3-TMEFF1 /// TMEFF1	0.0143503
ANP32B	-0.00704448										SYNDIG1L	0.0143547
ZBED5	-0.00704168										ZFP36L1	0.0143653
CIRBP	-0.00703716										AGPAT3	0.0143658
SNAPC4	-0.00703482										BBX	0.0143748
ATP10A	-0.00703138										RASA1	0.0143759
MRPS18A	-0.00702425										LIFR	0.0143984
PODXL	-0.00701324										YBX1	0.0144085
LRRN3	-0.00701295										FHL1	0.014411
C10orf54	-0.00701291										GAB1	0.0144275
NCAPH2	-0.00701233										SLIT2	0.0144379
ATG12	-0.00701119										PRKCB	0.0144402
FLRT3	-0.00700985										PDE1A	0.0144454
MAP3K4	-0.00700698										STIM2	0.0144459
PACS2	-0.0070053										RYBP	0.01445
RPL13A /// SNORD32A /// SNORD33 /// SNORD34 /// SNORD35A	-0.00700346										DNAJB1	0.0144691
TMEM41B	-0.00700243										NRCAM	0.0144778
RNF145	-0.00699724										NUDT3	0.0144822
SPTBN1	-0.0069967										POM121C	0.0144832
PPAP2A	-0.00699456										SDC2	0.0145009
CLIP2	-0.0069902										KCTD20	0.0145026
0	-0.00698478										IRF2BP2	0.0145047
STX16	-0.00698011										IL6ST	0.0145076
RUVBL2	-0.0069784										ATP2B3	0.0145112
FRG1 /// LOC100289097 /// LOC101930278 /// LOC101930531	-0.00697739										RHOQ	0.014533
MCF2	-0.00697591										MGST1	0.0145546
0	-0.0069748										DNAJB14	0.0145678
NTAN1	-0.00697299										AKAP12	0.0145783
PGRMC2	-0.00697175										ARHGAP26	0.0145938
FOXN3	-0.00696865										SLC4A4	0.0145944
UBXN1	-0.00696559										TCF4	0.0146018
ARHGEF10	-0.00696533										MOBP	0.0146048
IPO7	-0.00696532										TRIM2	0.0146283
NECAB3	-0.00695775										ANAPC5	0.0146422
FN1	-0.00695362										SNX27	0.0146432
ARHGEF37	-0.00695079										EIF4E	0.0146507
MTO1	-0.00695037										0	0.0146553
KDELR2	-0.00695018										CHMP3 /// RNF103-CHMP3	0.0146783
H3F3A /// H3F3B /// MIR4738	-0.0069479										FBXW7	0.014694
SNRPA1	-0.00694748										CNTN1	0.0147025
CRIPT	-0.00694537										SNCA	0.0147087
CACNA1G	-0.006945										PI4KB	0.0147342
C9orf16	-0.00694396										GATM	0.0147426
ADCK1	-0.00694379										GLS	0.0147559
KAT2A	-0.00693749										CHURC1	0.0147601
TNIP2	-0.00693533										MEF2C	0.0147663
TLE4	-0.00693522										FMNL2	0.0147684
COX6B1	-0.00693461										NAA50	0.0147726
MVB12B	-0.00693107										NRIP3	0.0147742
TMEM127	-0.00692397										MAT2A	0.0147754
BBC3 /// MIR3190 /// MIR3191	-0.00692116										MAP3K5	0.014786
ANKS6	-0.00691886										0	0.0147917
0	-0.00691855										CAMK2B	0.0148011
LAPTM4B	-0.00691828										SMARCA2	0.0148025
ZC3H4	-0.00691571										CAPRIN1	0.0148044
TJAP1	-0.00691487										CRIP2	0.014809
FASTKD1	-0.00690852										KIAA1147	0.0148132
0	-0.00690802										EZR	0.0148276
GCOM1 /// POLR2M	-0.006908										EIF3A	0.014828
ORC3	-0.00690717										HSP90B1	0.0148394
MGAT1	-0.00690156										LOC727820	0.0148418
RBM8A	-0.0068994										KMT2A	0.0148492
FN1	-0.00689922										0	0.0148497
SETD3	-0.00689453										MAP2	0.0148602
KLK6	-0.00688854										PCYOX1	0.0148656
C1orf61	-0.00688624										SLC11A2	0.0148713
EPHB6	-0.00688337										TMEM189 /// TMEM189-UBE2V1 /// UBE2V1 /// UBE2V2	0.0148854
PTDSS2	-0.00688307										GRIA2	0.014888
LOC101928916 /// NNMT	-0.00688151										TKT	0.0149005
NDUFB11	-0.00687805										DOCK5	0.0149037
FAM189A1	-0.00687754										PAPSS1	0.0149167
MRPS5	-0.00687621										PSEN1	0.0149186
PTPN18	-0.00687433										NME7	0.0149194
PRKCSH	-0.00687384										SCAF11	0.0149197
MCM7	-0.00686989										CGGBP1	0.0149257
TRIM8	-0.00686958										RHOBTB3	0.0149535
MTMR1	-0.00686902										RAB3GAP1	0.0149542
MIR6890 /// QARS	-0.00686806										H3F3A /// H3F3B /// MIR4738	0.0149627
DYNLT1	-0.00686584										DLG2	0.0149686
PPFIBP2	-0.00686566										CIRBP	0.01498
TSN	-0.00686402										APLP2	0.0149886
MAST3	-0.0068593										ZBTB20	0.0149967
CEACAM5	-0.00685557										PRRC2C	0.0150206
ANKRD40	-0.00685527										ASH1L	0.0150326
ZNF184	-0.00685258										SYNJ2BP /// SYNJ2BP-COX16	0.0150629
NOL11	-0.0068523										FGF14	0.0150657
CSPG5	-0.00685083										KIF5B	0.0150826
CDC42BPA	-0.00684803										TTC37	0.0150911
RPL23A /// SNORD42A	-0.00684399										KCTD1	0.0150999
GMFB	-0.00684246										UBXN4	0.0151177
NAAA	-0.00684141										AK3	0.0151198
KPNA2	-0.00684077										SMAD5	0.0151202
0	-0.00683289										COL4A3BP	0.0151203
NUDCD3	-0.00683139										MARCKS	0.0151206
PGAP3	-0.00682886										UBE2D3	0.0151324
C19orf66	-0.0068274										LMLN	0.0151331
IDI1	-0.0068269										ARFGEF2	0.0151585
CDS2	-0.00682529										LSM4	0.0151758
CDC42	-0.00682272										TSPAN5	0.0151781
0	-0.00682266										SNX3	0.0151924
LPHN1	-0.0068205										CAMK2B	0.0151977
0	-0.00681842										KCNAB1	0.0151988
LOC101928189 /// RSRP1	-0.00681762										ZFYVE21	0.0152037
VGLL4	-0.00681683										0	0.0152114
RIN2	-0.00681248										MBNL1	0.0152139
MUS81	-0.00680679										STOX2	0.0152167
KCNC4	-0.00680476										0	0.0152225
REXO2	-0.00680098										TRAPPC6B	0.01523
ATP5D	-0.00679752										CREB1	0.0152489
PSMA2	-0.00679508										TPD52L1	0.0152674
PAQR8	-0.0067948										RAB31	0.0152715
MAN1C1	-0.00679398										SORBS1	0.0152719
NENF	-0.00679262										STIP1	0.0152734
PAPOLA	-0.00678875										GOLGA8A /// GOLGA8B /// LOC101930583	0.0152922
AMPD2	-0.00678179										UBR3	0.0153001
ARF3	-0.00677959										ID2	0.0153198
LOC100996747 /// LOC101929876 /// RPS26 /// RPS26P11	-0.00677791										ELK4	0.0153207
PTPN2	-0.00677735										TMEM246	0.0153253
0	-0.00677428										AKT3	0.0153293
0	-0.00677326										FAM213A	0.0153623
VPS37C	-0.00676829										MIB1	0.015366
DDX17	-0.00676638										IMPAD1	0.0153663
RCN1	-0.00676252										C8orf44-SGK3 /// SGK3	0.0153688
TMEM212	-0.00675966										CAPNS1	0.0153714
DBT	-0.00675892										HDGFRP3	0.0153862
SMIM7	-0.00675878										PCDHGA10 /// PCDHGA11 /// PCDHGA12 /// PCDHGA3 /// PCDHGA5 /// PCDHGA6 /// PCDHGC3	0.0153906
FAM63A	-0.00675799										0	0.0154054
CTIF	-0.0067574										VPS29	0.015409
DAP3	-0.00675651										PTK2	0.0154122
SMOX	-0.00675482										ITPR1	0.015432
BAIAP2	-0.00675367										RAP2A /// RAP2B	0.0154391
RPL36A /// RPL36A-HNRNPH2	-0.00675301										NBPF10 /// NBPF14 /// NBPF26 /// NBPF9	0.0154548
CHD6	-0.00675297										ME1	0.0154663
VPS51	-0.00674964										ZYG11B	0.0154827
S100A6	-0.0067493										MACF1	0.0154929
0	-0.00674907										ITFG1	0.0154934
TTYH2	-0.00674516										LARP1	0.0155047
STX12	-0.00674377										PPP1R12A	0.0155191
NDUFS7	-0.00674277										PTN	0.0155367
LOC283070	-0.00674053										SEC22B	0.0155427
R3HDM2	-0.00674016										EZR	0.0155545
PAAF1	-0.00673935										EIF5	0.0155702
TMA7	-0.00673878										DDA1	0.0155731
CDH10	-0.00673649										ZFR	0.0155821
PDGFRA	-0.00673586										ACSL3	0.0155972
AGO1	-0.00673569										FERMT2	0.0155979
FBXO11	-0.00673501										YIPF5	0.015603
GM2A	-0.0067344										TERF1	0.0156072
ESRRG	-0.00673139										TROVE2	0.0156152
HMGN3	-0.00673103										LOC100996668 /// ZEB1	0.015623
AFTPH	-0.00672949										RABEP1	0.0156245
C2orf72	-0.00672226										0	0.0156357
PTP4A1	-0.00672224										0	0.0156452
RGCC	-0.00672037										OAZ2	0.015649
BCL2	-0.00671978										EFCAB14	0.0156494
C14orf2	-0.00671888										CALD1	0.0156658
BSDC1	-0.00671604										BTF3L4	0.0156803
OSBPL1A	-0.00671519										ZNF207	0.0156989
DENND3	-0.00671456										CNN3	0.0157029
0	-0.00671311										PCDHA1 /// PCDHA10 /// PCDHA11 /// PCDHA12 /// PCDHA13 /// PCDHA2 /// PCDHA3 /// PCDHA4 /// PCDHA5 /// PCDHA6 /// PCDHA7 /// PCDHA8 /// PCDHA9 /// PCDHAC1 /// PCDHAC2	0.01572
RBM17	-0.00670367										DHX36	0.015724
SNAPC5	-0.00670317										SFT2D1	0.0157324
TRAP1	-0.00670035										BBX	0.0157335
LOC101930578 /// MRPS31P5 /// THSD1	-0.00669891										IPO9	0.0157369
NXT2	-0.00669726										LMO4	0.0157389
TSPAN33	-0.00668966										ATP6V1G1	0.0157392
NR2F6	-0.00668818										PPIG	0.0157471
RPS19	-0.00668582										SLC39A6	0.015759
ARFGEF2	-0.00668474										VEZF1	0.0157696
CDK5RAP2	-0.00668413										GNB5	0.0157889
HSDL2	-0.00667734										RAB6A /// WTH3DI	0.0157946
TBC1D16	-0.00667547										FAM20B	0.0158199
LAMA5	-0.00667494										NCDN	0.0158207
0	-0.0066749										PCMT1	0.0158433
0	-0.0066749										BTG1	0.0158474
ATP5SL	-0.0066732										PRMT2	0.0158479
KIF13B	-0.00667052										LARP4B	0.0158531
SCYL1	-0.00666912										MPDZ	0.0158584
IFI27	-0.00666829										FBXO45	0.0158608
DGCR8 /// MIR1306	-0.0066613										FOXP1	0.0158817
TMEM9B	-0.0066602										MARCH6	0.0158878
TOM1L2	-0.00665903										SNX5	0.015895
ADCY9	-0.00665599										MAP2K4	0.0158995
HERC2	-0.00665385										0	0.0159015
ADIRF	-0.0066518										CREBRF	0.0159128
FTSJ3	-0.00665152										EGR1	0.0159645
PPFIA3	-0.00665013										BMPR1B	0.0159724
TFR2	-0.00664977										ATP6V1B2	0.0159769
VPS4B	-0.00664895										CAB39	0.0159872
CKAP4	-0.00664577										STAG2	0.0159895
VPS33B	-0.0066457										PEA15	0.015995
UBE2J1	-0.00664543										DSTN	0.0160073
NCAN	-0.0066439										JPH3	0.0160136
UBA52	-0.00664363										MED13	0.0160628
0	-0.00664289										UBE2R2	0.0160689
DCN	-0.00663847										C4orf3	0.0160692
TMEM63B	-0.00663692										ACTN1	0.0160837
TAF1D	-0.00663398										GATAD1	0.0160953
0	-0.00663311										MIB1	0.0161024
AP1S2	-0.00663046										USP33	0.0161073
GDPD5	-0.00662664										EDIL3	0.016109
ZNF528	-0.00662472										LOC101929087 /// SUMO2 /// SUMO3	0.0161099
FABP7	-0.00661795										CALM1 /// CALM2 /// CALM3	0.0161109
OGT	-0.00661787										PSMC3	0.0161275
ARPC4	-0.00661697										NCS1	0.0161448
PPARD	-0.00661474										COL4A3BP	0.0161522
DDRGK1	-0.00661404										SRP72	0.016158
MED27	-0.00661224										SPIRE1	0.0161659
FIG4	-0.00661205										PCBP2	0.0161828
TIMM10B	-0.0066113										TRIM23	0.0161871
RPL18P10 /// RPL18P10	-0.00661046										PRPF38B	0.0161882
FOLH1 /// FOLH1B	-0.00660265										ABHD10	0.016195
RNF130	-0.00660162										CADM3	0.0162134
GMEB2	-0.00660064										PNPLA8	0.0162313
ADAMTS1	-0.0066003										LRRC7	0.0162319
LRP10	-0.00659844										SRRM4	0.0162746
CDK5RAP3	-0.00659758										BCAP29	0.01628
WDR82	-0.0065952										TTC3 /// TTC3P1	0.0162834
RYR3	-0.00659283										AP2A1	0.016284
NOP2	-0.00658925										UQCRC2	0.0162931
GCA	-0.0065885										ZNF292	0.0163152
0	-0.0065866										DIXDC1	0.0163204
AGAP3	-0.00658293										ATP6V0A1	0.0163383
SON	-0.00657926										GDAP1	0.0163444
NSMCE4A	-0.00657819										DTNA	0.016348
GRSF1	-0.00657694										SAMD12	0.0163804
FRMD4A	-0.00657478										BMPR2	0.0163824
LRFN1	-0.006572										GLRB	0.016396
TTLL5	-0.00656883										GPR88	0.0163976
TRAPPC12	-0.00656193										MYEF2	0.0163996
TTC1	-0.0065605										ARIH2	0.0164109
[truncated: 43,554 more rows]

## Sheet: Unbalanced process 3
	unbalanced process 3										1585 transcripts are affected by unbalanced process 3 (i.e. were assigned G3>0.01 or G3<-0.01)
[truncated: 44,829 more rows]

[truncated: 4 more sheets: Unbalanced process 4, Unbalanced process 5, Unbalanced process 6, Unbalanced process 7]
