# Supplementary material for: Exploring Alzheimer’s Disease Molecular Variability via Calculation of Personalized Transcriptional Signatures
Source: Biomolecules. 2020 Mar 26;10(4):503. doi: 10.3390/biom10040503 (PMC7226317; doi:10.3390/biom10040503)
Supplement: Supplementary file 1 [file biomolecules-10-00503-s001.zip › suppl/Supp Table 2.xlsx]

## Sheet: Steady state G0
Transcripts participating in the steady state process (i.e. with G0>0.012; see Supp. Table 1) were categorized according to GO:
Term	Count	%	PValue	Genes	List Total	Pop Hits	Pop Total	Fold Enrichment	Benjamini
GO:0006414~translational elongation	65	20.5696	4.7127e-87	RPL18, RPL17, RPL36A, RPL14, RPL13, RPL15, RPLP2, RPS2, RPS3, RPS3A, RPLP1, RPL12, RPS27A, RPS4X, RPS18, RPS19, RPL41, RPS16, RPS17, RPS14, RPS15, UBC, RPS12, RPS13, RPS10, RPS11, UBB, RPL27A, RPL37, RPL38, RPL39, RPL13AP5, RPL21P28, RPS25, RPS27, RPL30, RPS28, RPL7, RPL32, RPS29, RPL31, RPL6, RPL9, RPSAP58, RPL34, RPL8, RPL3, RPL5, RPL10A, RPL4, RPS20, RPS21, RPS23, RPS24, EEF1A1, RPSA, RPSAP19,…	258	101	13528	33.7447	7.99745e-84		Note: The complete lists showing the transcripts affected by each of the unbalanced processes are shown in Supp. Table 1. Note that the positive and negative G values show correlations and anti-correlations between transcripts. All transcripts assigned positive G values undergo deviations in expression levels that are opposite from the deviations of the transcripts assigned negative G values. The…
GO:0006412~translation	70	22.1519	4.32297e-53	RPL18, RPL17, RPL36A, RPL14, NARS, RPL13, RPL15, RPLP2, RPS2, RPS3, RPS3A, RPLP1, EIF1, RPL12, RPS27A, RPS4X, RPS18, RPS19, RPL41, RPS16, RPS17, EIF4A2, RPS14, RPS15, UBC, RPS12, RPS13, RPS10, RPS11, UBB, NACA, RPL27A, RPL37, RPL38, RPL39, RPL13AP5, RPL21P28, RPS25, RPS27, RPL30, RPS28, RPL7, RPL32, RPS29, RPL31, RPL6, RPL34, RPSAP58, RPL9, RPL8, RPL3, EIF3L, RPL5, RPL10A, RPL4, RPS20, RPS21, RPS…	258	331	13528	11.0888	3.66804e-50
GO:0042274~ribosomal small subunit biogenesis	9	2.8481	2.39158e-12	RPS28, RPS19, RPS16, RPS17, RPS14, RPS15, RPS6, RPS7, RPS24	258	11	13528	42.9006	1.35281e-09
GO:0007156~homophilic cell adhesion	20	6.32911	5.36893e-12	PCDHGA12, PCDHGA10, PCDHGA11, PCDHGA9, PCDHGB7, PCDHGA8, PCDHGA7, PCDHGB6, PCDHGC5, PCDHGA6, PCDHGC4, PCDHGA5, PCDHGC3, PCDHGA4, PCDHGB3, PCDHGB2, PCDHGA3, PCDHGA2, PCDHGB5, PCDHGA1, PCDHGB4, PCDHGB1, NPTN	258	131	13528	8.00521	2.27777e-09
GO:0006091~generation of precursor metabolites and energy	25	7.91139	6.5334e-09	ALDOA, LDHB, ATP5E, LDHA, IL6ST, NDUFB8, ALDOC, COX7C, PGAM1, ATP6V0C, SLC1A3, ATP5I, GAPDH, ATP5J, NDUFA4, ND4, COX4I1, PPP1CB, COX6C, ATP6V0E2, COX6A1, GNAS, ATP5A1, UQCRB, MDH1	258	313	13528	4.18803	2.21743e-06
GO:0030182~neuron differentiation	29	9.17722	1.9025e-08	TUBB2B, TUBB2A, CLU, GJA1, CNP, RTN1, APP, SLC1A3, ANK3, MTCH1, NGRN, RAC1, SNAP25, NEFL, RPS27A, TUBB3, ACTB, STMN2, KIF5C, MAP1B, STXBP1, RPL24, SOD1, MAP2, NTRK2, UBC, OPHN1, UBB, FEZ1	258	438	13528	3.47166	5.3809e-06
GO:0016337~cell-cell adhesion	21	6.64557	3.13895e-07	PCDHGA12, PCDHGA10, PCDHGA11, PCDHGA9, PCDHGB7, PCDHGA8, STXBP1, PCDHGA7, PCDHGB6, PCDHGC5, PCDHGA6, PCDHGC4, PCDHGA5, PCDHGC3, PCDHGA4, PCDHGB3, PCDHGB2, PCDHGA3, PCDHGA2, PCDHGB5, PCDHGB4, PCDHGA1, PCDHGB1, NPTN	258	276	13528	3.98955	7.60943e-05
GO:0048667~cell morphogenesis involved in neuron differentiation	18	5.6962	4.96906e-07	ACTB, KIF5C, MAP1B, STXBP1, CNP, RPL24, SOD1, APP, SLC1A3, ANK3, RAC1, UBC, OPHN1, UBB, SNAP25, NEFL, RPS27A, FEZ1	258	209	13528	4.51586	0.000105401
GO:0048666~neuron development	23	7.27848	5.31764e-07	ACTB, CLU, MAP1B, KIF5C, STXBP1, GJA1, CNP, RPL24, SOD1, APP, SLC1A3, ANK3, MTCH1, NTRK2, MAP2, RAC1, UBC, OPHN1, UBB, SNAP25, NEFL, RPS27A, FEZ1	258	339	13528	3.55748	0.000100262
GO:0048812~neuron projection morphogenesis	18	5.6962	6.49223e-07	ACTB, CLU, KIF5C, MAP1B, STXBP1, GJA1, CNP, RPL24, APP, ANK3, RAC1, UBC, OPHN1, UBB, SNAP25, NEFL, RPS27A, FEZ1	258	213	13528	4.43105	0.000110167
GO:0006364~rRNA processing	12	3.79747	1.29782e-06	RPS28, RPS19, RPL14, RPS16, RPL7, RPS17, RPS14, RPS15, RPL5, RPS6, RPS7, RPS24	258	92	13528	6.83923	0.000200198
GO:0031175~neuron projection development	19	6.01266	1.92016e-06	ACTB, CLU, MAP1B, KIF5C, STXBP1, GJA1, CNP, RPL24, APP, ANK3, MAP2, RAC1, UBC, OPHN1, UBB, SNAP25, NEFL, RPS27A, FEZ1	258	256	13528	3.89159	0.000271506
GO:0016072~rRNA metabolic process	12	3.79747	1.9914e-06	RPS28, RPS19, RPL14, RPS16, RPL7, RPS17, RPS14, RPS15, RPL5, RPS6, RPS7, RPS24	258	96	13528	6.55426	0.000259921
GO:0044087~regulation of cellular component biogenesis	14	4.43038	3.05986e-06	HMGB1, MAP1B, CLU, STXBP1, TMSB10, TPPP, RAC1, UBC, SPTBN1, TMSB4X, UBB, SNAP25, RPS27A, SPTAN1	258	142	13528	5.16956	0.00037083
GO:0042254~ribosome biogenesis	13	4.11392	3.48597e-06	RPL14, RPL24, RPS6, RPS7, RPS19, RPS28, RPL7, RPS16, RPS17, RPS14, RPS15, RPL5, RPS24	258	122	13528	5.58724	0.000394303
GO:0051258~protein polymerization	9	2.8481	3.49819e-06	TUBB2B, TUBB2A, TPPP, RAC1, TUBA1A, NEFL, TUBA1B, TUBA1C, TUBB3	258	49	13528	9.63075	0.000370959
GO:0007409~axonogenesis	16	5.06329	4.16236e-06	ACTB, KIF5C, MAP1B, STXBP1, CNP, RPL24, APP, ANK3, RAC1, UBC, OPHN1, UBB, SNAP25, NEFL, RPS27A, FEZ1	258	193	13528	4.34687	0.000415416
GO:0000904~cell morphogenesis involved in differentiation	18	5.6962	4.21266e-06	ACTB, KIF5C, MAP1B, STXBP1, CNP, RPL24, SOD1, APP, SLC1A3, ANK3, RAC1, UBC, OPHN1, UBB, SNAP25, NEFL, RPS27A, FEZ1	258	244	13528	3.86809	0.000397082
GO:0048858~cell projection morphogenesis	18	5.6962	4.45135e-06	ACTB, CLU, KIF5C, MAP1B, STXBP1, GJA1, CNP, RPL24, APP, ANK3, RAC1, UBC, OPHN1, UBB, SNAP25, NEFL, RPS27A, FEZ1	258	245	13528	3.8523	0.000397498
GO:0032990~cell part morphogenesis	18	5.6962	7.99916e-06	ACTB, CLU, KIF5C, MAP1B, STXBP1, GJA1, CNP, RPL24, APP, ANK3, RAC1, UBC, OPHN1, UBB, SNAP25, NEFL, RPS27A, FEZ1	258	256	13528	3.68677	0.000678501
GO:0010035~response to inorganic substance	16	5.06329	8.67948e-06	ACTB, SYT1, CRYAB, MAP1B, SOD1, PARK7, MT1X, ACTG1, SLC1A3, GRIA2, PPP2CB, CALM3, ABAT, PEBP1, PRNP, MT1H, CALM2, CALM1	258	205	13528	4.09242	0.000701142
GO:0019226~transmission of nerve impulse	21	6.64557	1.20517e-05	SYT1, PLP1, KIF5A, CNP, ATP1A2, SOD1, VDAC3, PARK7, MBP, SLC1A2, APP, SLC1A3, GRIA2, UBC, ABAT, PEBP1, QKI, UBB, PPP3CA, SNAP25, RPS27A	258	350	13528	3.14605	0.000929199
GO:0000902~cell morphogenesis	21	6.64557	1.54796e-05	ACTB, CLU, KIF5C, MAP1B, STXBP1, GJA1, CNP, RPL24, SOD1, APP, SLC1A3, ANK3, CFL1, RAC1, UBC, OPHN1, UBB, SNAP25, NEFL, RPS27A, FEZ1	258	356	13528	3.09302	0.00114148
GO:0007268~synaptic transmission	19	6.01266	1.58318e-05	SYT1, PLP1, KIF5A, CNP, ATP1A2, VDAC3, PARK7, MBP, SLC1A2, APP, SLC1A3, GRIA2, UBC, ABAT, PEBP1, UBB, PPP3CA, SNAP25, RPS27A	258	298	13528	3.34311	0.00111882
GO:0051129~negative regulation of cellular component organization	13	4.11392	1.6708e-05	RTN4, HMGB1, MAP1A, MAP1B, CLU, CST3, TMSB10, MBP, RAC1, MAP2, SPTBN1, TMSB4X, SPTAN1	258	142	13528	4.80031	0.0011335
GO:0032989~cellular component morphogenesis	22	6.96203	2.3291e-05	ACTB, CLU, MAP1B, KIF5C, STXBP1, GJA1, CNP, RPL24, SOD1, ACTG1, APP, SLC1A3, ANK3, CFL1, RAC1, UBC, OPHN1, UBB, SNAP25, NEFL, RPS27A, FEZ1	258	397	13528	2.90567	0.00151905
GO:0051969~regulation of transmission of nerve impulse	13	4.11392	2.36663e-05	TF, MAP1B, STXBP1, YWHAG, SLC1A3, GRIA2, NTRK2, NPTN, UBC, PEBP1, UBB, PPP3CA, RPS27A	258	147	13528	4.63703	0.00148639
GO:0031644~regulation of neurological system process	13	4.11392	3.52392e-05	TF, MAP1B, STXBP1, YWHAG, SLC1A3, GRIA2, NTRK2, NPTN, UBC, PEBP1, UBB, PPP3CA, RPS27A	258	153	13528	4.45519	0.00213351
GO:0043254~regulation of protein complex assembly	10	3.16456	5.17597e-05	HMGB1, TPPP, CLU, MAP1B, RAC1, STXBP1, SPTBN1, TMSB4X, TMSB10, SPTAN1	258	90	13528	5.82601	0.00302433
GO:0050804~regulation of synaptic transmission	12	3.79747	5.63662e-05	YWHAG, SLC1A3, GRIA2, MAP1B, NTRK2, STXBP1, UBC, NPTN, PEBP1, UBB, PPP3CA, RPS27A	258	136	13528	4.62654	0.00318346
GO:0030030~cell projection organization	20	6.32911	7.92034e-05	ACTB, CLU, MAP1B, KIF5C, STXBP1, GJA1, CNP, RPL24, SOD1, APP, ANK3, MAP2, RAC1, UBC, OPHN1, UBB, SNAP25, NEFL, RPS27A, FEZ1	258	368	13528	2.84968	0.00432653
GO:0031646~positive regulation of neurological system process	7	2.21519	8.54887e-05	TF, SLC1A3, GRIA2, NTRK2, UBC, UBB, RPS27A	258	39	13528	9.41125	0.0045235
GO:0007017~microtubule-based process	16	5.06329	0.000100347	TUBB2B, KIF5A, TUBB2A, CRYAB, KIF5C, MAP1B, CNP, APP, DYNLL1, TPPP, MAP2, TUBA1A, TUBA1B, NEFL, TUBA1C, TUBB3	258	253	13528	3.31599	0.00514722
GO:0009206~purine ribonucleoside triphosphate biosynthetic process	10	3.16456	0.000101092	ATP6V0C, ALDOA, ATP5E, ATP1B1, ATP6V0E2, ATP1A2, ATP5A1, ATP5I, NME7, ATP5J	258	98	13528	5.35042	0.0050332
GO:0006119~oxidative phosphorylation	10	3.16456	0.000101092	ATP6V0C, NDUFA4, ATP5E, ATP6V0E2, ND4, NDUFB8, ATP5A1, ATP5I, UQCRB, ATP5J	258	98	13528	5.35042	0.0050332
GO:0009145~purine nucleoside triphosphate biosynthetic process	10	3.16456	0.000109385	ATP6V0C, ALDOA, ATP5E, ATP1B1, ATP6V0E2, ATP1A2, ATP5A1, ATP5I, NME7, ATP5J	258	99	13528	5.29637	0.00528987
GO:0009201~ribonucleoside triphosphate biosynthetic process	10	3.16456	0.000109385	ATP6V0C, ALDOA, ATP5E, ATP1B1, ATP6V0E2, ATP1A2, ATP5A1, ATP5I, NME7, ATP5J	258	99	13528	5.29637	0.00528987
GO:0009142~nucleoside triphosphate biosynthetic process	10	3.16456	0.000137762	ATP6V0C, ALDOA, ATP5E, ATP1B1, ATP6V0E2, ATP1A2, ATP5A1, ATP5I, NME7, ATP5J	258	102	13528	5.1406	0.00647334
GO:0008064~regulation of actin polymerization or depolymerization	8	2.53165	0.00014968	PFN2, CFL1, RAC1, SPTBN1, TMSB4X, TMSB10, SPTAN1, DSTN	258	61	13528	6.8766	0.00684208
GO:0022613~ribonucleoprotein complex biogenesis	13	4.11392	0.000168775	RPL14, RPL24, RPS6, RPS7, RPS19, RPS28, RPL7, RPS16, RPS17, RPS14, RPS15, RPL5, RPS24	258	180	13528	3.78691	0.00750944
GO:0010038~response to metal ion	11	3.48101	0.000174231	ACTG1, ACTB, SYT1, GRIA2, CALM3, ABAT, PEBP1, SOD1, PRNP, MT1H, CALM2, MT1X, CALM1	258	129	13528	4.47113	0.00755326
GO:0030832~regulation of actin filament length	8	2.53165	0.000183802	PFN2, CFL1, RAC1, SPTBN1, TMSB4X, TMSB10, SPTAN1, DSTN	258	63	13528	6.6583	0.00776817
GO:0007411~axon guidance	10	3.16456	0.000198631	APP, ANK3, KIF5C, RAC1, UBC, OPHN1, RPL24, UBB, RPS27A, FEZ1	258	107	13528	4.90038	0.0081885
GO:0006096~glycolysis	7	2.21519	0.000247813	ALDOA, LDHB, LDHA, ALDOC, PGAM1, GAPDH, MDH1	258	47	13528	7.80934	0.00996411
GO:0051493~regulation of cytoskeleton organization	11	3.48101	0.000268228	PFN2, MAP1A, MAP2, CFL1, MAP1B, RAC1, SPTBN1, TMSB4X, TMSB10, SPTAN1, DSTN	258	136	13528	4.24099	0.0105312
GO:0006754~ATP biosynthetic process	9	2.8481	0.00028493	ATP6V0C, ALDOA, ATP5E, ATP1B1, ATP6V0E2, ATP1A2, ATP5A1, ATP5I, ATP5J	258	89	13528	5.30233	0.0109306
GO:0006873~cellular ion homeostasis	19	6.01266	0.000291017	TF, PLP1, IL6ST, ATP1A2, SOD1, FTH1, APLP2, PARK7, MBP, CKB, APP, ATP6V0E2, MT2A, TPT1, QKI, PPP3CA, PRNP, MT1H, FTL	258	374	13528	2.66376	0.0109161
GO:0007018~microtubule-based movement	10	3.16456	0.000299687	APP, TUBB2B, TUBB2A, KIF5A, KIF5C, TUBA1A, NEFL, TUBA1B, TUBA1C, TUBB3	258	113	13528	4.64019	0.0109966
GO:0034220~ion transmembrane transport	7	2.21519	0.00031267	ATP6V0C, ATP5E, ATP6V0E2, ATP1A2, ATP5A1, ATP5I, ATP5J	258	49	13528	7.49059	0.0112276
GO:0055082~cellular chemical homeostasis	19	6.01266	0.000352258	TF, PLP1, IL6ST, ATP1A2, SOD1, FTH1, APLP2, PARK7, MBP, CKB, APP, ATP6V0E2, MT2A, TPT1, QKI, PPP3CA, PRNP, MT1H, FTL	258	380	13528	2.62171	0.0123787
GO:0009205~purine ribonucleoside triphosphate metabolic process	10	3.16456	0.000388233	ATP6V0C, ALDOA, ATP5E, ATP1B1, ATP6V0E2, ATP1A2, ATP5A1, ATP5I, NME7, ATP5J	258	117	13528	4.48155	0.0133581
GO:0009152~purine ribonucleotide biosynthetic process	10	3.16456	0.000388233	ATP6V0C, ALDOA, ATP5E, ATP1B1, ATP6V0E2, ATP1A2, ATP5A1, ATP5I, NME7, ATP5J	258	117	13528	4.48155	0.0133581
GO:0043244~regulation of protein complex disassembly	7	2.21519	0.000390132	MAP1A, MAP2, CFL1, MAP1B, SPTBN1, SPTAN1, DSTN	258	51	13528	7.19684	0.0131564
GO:0009199~ribonucleoside triphosphate metabolic process	10	3.16456	0.000413448	ATP6V0C, ALDOA, ATP5E, ATP1B1, ATP6V0E2, ATP1A2, ATP5A1, ATP5I, NME7, ATP5J	258	118	13528	4.44357	0.0136659
GO:0050806~positive regulation of synaptic transmission	6	1.89873	0.000421955	SLC1A3, GRIA2, NTRK2, UBC, UBB, RPS27A	258	34	13528	9.25308	0.0136788
GO:0009144~purine nucleoside triphosphate metabolic process	10	3.16456	0.000528185	ATP6V0C, ALDOA, ATP5E, ATP1B1, ATP6V0E2, ATP1A2, ATP5A1, ATP5I, NME7, ATP5J	258	122	13528	4.29788	0.0167741
GO:0051494~negative regulation of cytoskeleton organization	7	2.21519	0.000589498	MAP1A, MAP2, MAP1B, SPTBN1, TMSB4X, TMSB10, SPTAN1	258	55	13528	6.67343	0.0183604
GO:0009260~ribonucleotide biosynthetic process	10	3.16456	0.000594661	ATP6V0C, ALDOA, ATP5E, ATP1B1, ATP6V0E2, ATP1A2, ATP5A1, ATP5I, NME7, ATP5J	258	124	13528	4.22856	0.0181861
GO:0051971~positive regulation of transmission of nerve impulse	6	1.89873	0.000631055	SLC1A3, GRIA2, NTRK2, UBC, UBB, RPS27A	258	37	13528	8.50283	0.0189475
GO:0032535~regulation of cellular component size	15	4.74684	0.000687922	RTN4, CRYAB, MAP1B, TMSB10, DDX5, DSTN, PFN2, APP, ATP6V0E2, RAC1, CFL1, SPTBN1, TMSB4X, NEFL, SPTAN1	258	271	13528	2.90226	0.0202794
GO:0001504~neurotransmitter uptake	4	1.26582	0.000736688	SLC1A3, ATP1A2, SNAP25, PARK7	258	10	13528	20.9736	0.0213316
GO:0006878~cellular copper ion homeostasis	4	1.26582	0.000736688	APP, MT2A, PRNP, APLP2	258	10	13528	20.9736	0.0213316
GO:0042273~ribosomal large subunit biogenesis	4	1.26582	0.000736688	RPL14, RPL7, RPL5, RPL24	258	10	13528	20.9736	0.0213316
GO:0046907~intracellular transport	26	8.22785	0.000750039	MYL6, ARL6IP1, GABARAPL2, SRP14, YWHAZ, HSP90AA1, YWHAB, CLTC, HNRNPA1, YWHAE, FTH1, YWHAG, APP, TOMM7, SLC1A3, RPL23, RPS15, YWHAQ, SPTBN1, GNAS, SCG5, PPP3CA, NEFL, SNAP25, HSPA8, FTL	258	657	13528	2.07502	0.02135
GO:0006007~glucose catabolic process	7	2.21519	0.000784966	ALDOA, LDHB, LDHA, ALDOC, PGAM1, GAPDH, MDH1	258	58	13528	6.32825	0.0219653
GO:0050801~ion homeostasis	19	6.01266	0.00083986	TF, PLP1, IL6ST, ATP1A2, SOD1, FTH1, APLP2, PARK7, MBP, CKB, APP, ATP6V0E2, MT2A, TPT1, QKI, PPP3CA, PRNP, MT1H, FTL	258	409	13528	2.43581	0.0231034
GO:0044057~regulation of system process	16	5.06329	0.000847081	TF, IL6ST, MAP1B, STXBP1, ATP1A2, SOD1, YWHAG, SLC1A3, GRIA2, NTRK2, UBC, NPTN, PEBP1, UBB, PPP3CA, RPS27A	258	309	13528	2.71503	0.0229283
GO:0046034~ATP metabolic process	9	2.8481	0.000867274	ATP6V0C, ALDOA, ATP5E, ATP1B1, ATP6V0E2, ATP1A2, ATP5A1, ATP5I, ATP5J	258	105	13528	4.49435	0.0231005
GO:0009141~nucleoside triphosphate metabolic process	10	3.16456	0.000883415	ATP6V0C, ALDOA, ATP5E, ATP1B1, ATP6V0E2, ATP1A2, ATP5A1, ATP5I, NME7, ATP5J	258	131	13528	4.0026	0.0231622
GO:0034470~ncRNA processing	12	3.79747	0.000900049	RPS28, RPS19, RPL14, RPS16, RPL7, RPS17, RPS14, RPS15, RPL5, RPS6, RPS7, RPS24	258	187	13528	3.36476	0.0232346
GO:0015985~energy coupled proton transport, down electrochemical gradient	6	1.89873	0.000909502	ATP6V0C, ATP5E, ATP6V0E2, ATP5A1, ATP5I, ATP5J	258	40	13528	7.86512	0.0231243
GO:0015986~ATP synthesis coupled proton transport	6	1.89873	0.000909502	ATP6V0C, ATP5E, ATP6V0E2, ATP5A1, ATP5I, ATP5J	258	40	13528	7.86512	0.0231243
GO:0055070~copper ion homeostasis	4	1.26582	0.000998768	APP, MT2A, PRNP, APLP2	258	11	13528	19.0669	0.0249922
GO:0050803~regulation of synapse structure and activity	5	1.58228	0.00100215	APP, UBC, UBB, SNAP25, RPS27A	258	24	13528	10.9238	0.0247117
GO:0015992~proton transport	7	2.21519	0.00102705	ATP6V0C, ATP5E, ATP6V0E2, ATP1A2, ATP5A1, ATP5I, ATP5J	258	61	13528	6.01703	0.0249559
GO:0042257~ribosomal subunit assembly	3	0.949367	0.00106504	RPS14, RPS15, RPL24	258	3	13528	52.4341	0.0255026
GO:0051960~regulation of nervous system development	12	3.79747	0.00111478	RTN4, TF, YWHAG, MAP1B, NTRK2, UBC, NPTN, UBB, NEFL, SNAP25, RPS27A, MBP	258	192	13528	3.27713	0.0263074
GO:0006818~hydrogen transport	7	2.21519	0.00121778	ATP6V0C, ATP5E, ATP6V0E2, ATP1A2, ATP5A1, ATP5I, ATP5J	258	63	13528	5.82601	0.0283114
GO:0009150~purine ribonucleotide metabolic process	10	3.16456	0.00127707	ATP6V0C, ALDOA, ATP5E, ATP1B1, ATP6V0E2, ATP1A2, ATP5A1, ATP5I, NME7, ATP5J	258	138	13528	3.79957	0.0292696
GO:0019725~cellular homeostasis	20	6.32911	0.00147883	ALDOA, TF, PLP1, IL6ST, ATP1A2, SOD1, FTH1, APLP2, PARK7, MBP, CKB, APP, ATP6V0E2, MT2A, TPT1, QKI, PPP3CA, PRNP, MT1H, FTL	258	466	13528	2.25039	0.0333688
GO:0032956~regulation of actin cytoskeleton organization	8	2.53165	0.00150779	PFN2, CFL1, RAC1, SPTBN1, TMSB4X, TMSB10, SPTAN1, DSTN	258	89	13528	4.71318	0.0335657
GO:0034660~ncRNA metabolic process	13	4.11392	0.00150787	RPS28, RPS19, NARS, RPL14, RPS16, RPL7, RPS17, RPS14, RPS15, RPL5, RPS6, RPS7, RPS24	258	230	13528	2.96367	0.0331332
GO:0001505~regulation of neurotransmitter levels	7	2.21519	0.00167943	SYT1, SLC1A3, ABAT, PEBP1, ATP1A2, SNAP25, PARK7	258	67	13528	5.47819	0.0363662
GO:0007010~cytoskeleton organization	19	6.01266	0.00171351	ALDOA, CRYAB, MAP1B, CNP, TMSB10, SOD1, DSTN, ACTG1, PFN2, DYNLL1, ANK3, TPPP, MAP2, RAC1, CFL1, OPHN1, TMSB4X, TUBA1B, NEFL	258	436	13528	2.28497	0.0366242
GO:0032271~regulation of protein polymerization	7	2.21519	0.0018132	TPPP, MAP1B, RAC1, SPTBN1, TMSB4X, TMSB10, SPTAN1	258	68	13528	5.39763	0.0382345
GO:0032970~regulation of actin filament-based process	8	2.53165	0.00182725	PFN2, CFL1, RAC1, SPTBN1, TMSB4X, TMSB10, SPTAN1, DSTN	258	92	13528	4.55949	0.038053
GO:0022610~biological adhesion	26	8.22785	0.00183358	PCDHGA9, PCDHGA8, PCDHGA7, PCDHGC5, PCDHGA6, PCDHGC4, PCDHGA5, PCDHGC3, EDIL3, PCDHGA4, PCDHGA3, PCDHGA2, PCDHGA1, PCDHGB1, APP, RPSAP58, RAC1, PCDHGA12, RPSA, RPSAP19, PCDHGA10, PCDHGA11, PCDHGB7, STXBP1, PCDHGB6, RPSAP9, PCDHGB3, PCDHGB2, PCDHGB5, PCDHGB4, NPTN, FEZ1	258	701	13528	1.94477	0.0377201
GO:0007155~cell adhesion	26	8.22785	0.00184375	PCDHGA9, PCDHGA8, PCDHGA7, PCDHGC5, PCDHGA6, PCDHGC4, PCDHGA5, PCDHGC3, EDIL3, PCDHGA4, PCDHGA3, PCDHGA2, PCDHGA1, PCDHGB1, APP, RPSAP58, RAC1, PCDHGA12, RPSA, RPSAP19, PCDHGA10, PCDHGA11, PCDHGB7, STXBP1, PCDHGB6, RPSAP9, PCDHGB3, PCDHGB2, PCDHGB5, PCDHGB4, NPTN, FEZ1	258	700	13528	1.94755	0.0374716
GO:0019320~hexose catabolic process	7	2.21519	0.00195489	ALDOA, LDHB, LDHA, ALDOC, PGAM1, GAPDH, MDH1	258	69	13528	5.3194	0.0392186
GO:0006916~anti-apoptosis	12	3.79747	0.00195927	HMGB1, PEA15, YWHAZ, CRYAB, CLU, CFL1, UBC, TPT1, UBB, SOD1, PRNP, RPS27A	258	206	13528	3.05441	0.038846
GO:0009259~ribonucleotide metabolic process	10	3.16456	0.00197935	ATP6V0C, ALDOA, ATP5E, ATP1B1, ATP6V0E2, ATP1A2, ATP5A1, ATP5I, NME7, ATP5J	258	147	13528	3.56695	0.0387842
GO:0006164~purine nucleotide biosynthetic process	10	3.16456	0.00207339	ATP6V0C, ALDOA, ATP5E, ATP1B1, ATP6V0E2, ATP1A2, ATP5A1, ATP5I, NME7, ATP5J	258	148	13528	3.54285	0.0401284
GO:0046365~monosaccharide catabolic process	7	2.21519	0.00226324	ALDOA, LDHB, LDHA, ALDOC, PGAM1, GAPDH, MDH1	258	71	13528	5.16956	0.0432338
GO:0006006~glucose metabolic process	10	3.16456	0.00259843	ALDOA, LDHB, LDHA, CRYAB, IL6ST, ALDOC, PGAM1, GAPDH, PPP1CB, MDH1	258	153	13528	3.42707	0.0489357

## Sheet: Process 1 G1>0.01
Transcripts participating in unbalanced process 1 (only those with G1>0.01*; see Supp. Table 1) were categorized according to GO:
Term	Count	%	PValue	Genes	List Total	Pop Hits	Pop Total	Fold Enrichment	Benjamini
GO:0007399~nervous system development	65	4.84713	2.97336e-17	PCDHA6, MEF2C, PCDHA7, GDA, PCDHA8, PCDHA2, PCDHA3, SCN3B, FGF14, PCDHA4, NELL1, PCDHA5, FGF13, L1CAM, TTLL7, PCDHA1, FGF12, SRRM4, KCNQ2, RBFOX1, RBFOX2, SCN2B, STMN3, ARHGEF7, ENC1, ARHGAP26, MYT1L, NDEL1, DOC2A, CHRM3, CHRM1, EFNA5, NRSN1, NRGN, CNTN3, RAPGEFL1, SMARCA4, KALRN, CPLX2, SERF1A, CAMK2G, SERF1B, BEX1, NRN1, PCDHAC2, PCDHAC1, PCSK2, CRMP1, LY6H, PCDHA10, APBA2, PCDHA11, OLFM1, DCLK…	1171	287	16792	3.24771	9.92507e-14		Note: The complete lists showing the transcripts affected by each of the unbalanced processes are shown in Supp. Table 1. Note that the positive and negative G values show correlations and anti-correlations between transcripts. All transcripts assigned positive G values undergo deviations in expression levels that are opposite from the deviations of the transcripts assigned negative G values. The…
GO:0007268~chemical synaptic transmission	56	4.17599	1.9155e-15	SYT1, SNCG, SNCB, GABRB2, GABBR2, FGF12, RTN3, KCNQ5, KCNQ3, KCNQ2, SLC1A1, SCN2B, GRIN2A, BSN, PCDH8, NRXN1, GRM1, CDK5, GRM5, MAPK1, DOC2A, SLITRK5, UNC13A, MYO5A, SNAP91, CPLX1, KCNA1, CACNB1, CACNB2, CACNB3, AMPH, NPTX1, SYN1, NPTX2, SYN2, APBA2, PAFAH1B1, LRFN5, SNAP25, GAD1, APBA1, NOVA1, GABRD, DLGAP1, GLRB, SLC12A5, GABRA5, GRIA3, GRIA4, HOMER1, GRIA2, GRIA1, GLS, RIT2, CACNA1B, HTR2A	1171	240	16792	3.34597	3.15004e-12
GO:0007269~neurotransmitter secretion	22	1.64057	6.46408e-12	PPFIA2, RAB3A, SYT1, PPFIA4, STX1A, CPLX1, NRXN3, PTPRN2, STXBP1, NRXN1, RIMS1, LIN7A, SYN1, SYN2, SNPH, DNAJC5, VAMP2, GAD1, SNAP25, UNC13A, APBA1, CACNA1B	1171	51	16792	6.18583	7.19233e-09
GO:0014047~glutamate secretion	16	1.19314	6.41254e-11	PPFIA2, RAB3A, SYT1, PPFIA4, STX1A, CPLX1, STXBP1, RIMS1, SLC17A7, GLS2, GLS, NTRK2, VAMP2, SNAP25, SLC1A1, APBA1	1171	28	16792	8.19422	5.35126e-08
GO:0034220~ion transmembrane transport	44	3.28113	1.15787e-10	GABRB3, GABRB2, ATP6AP1, ATP6V1G2, ATP6V1B2, FKBP1B, FXYD6, FXYD7, ATP6V0B, ATP2B1, ANXA6, ATP6V0C, ATP2B2, SLC24A2, ANO5, NALCN, NEDD4L, ATP6V0D1, GABRG2, GLRB, GABRA1, NCALD, GABRA5, ATP1A3, ATP6V1H, GRIA3, ATP1A1, GRIA4, ARHGEF9, ATP6V1D, ATP13A2, ATP6V1C1, ATP6V1A, ATP2A2, GRIA2, GRIA1, ATP6V1E1, ATP6V0A1, CALM3, UNC80, RYR2, CALM2, CLCN4, CALM1	1171	210	16792	3.00455	7.72993e-08
GO:0016241~regulation of macroautophagy	19	1.41685	2.38128e-10	CDK5R1, UCHL1, ATP6V1H, ATP6V1G2, UBQLN2, ATP6V1B2, ATP6V1D, CDK5, ATP13A2, ATP6V0B, ATP6V1C1, ATP6V0C, ATP6V1A, ATP6V1E1, ATP6V0A1, VPS35, MAPK8, PRKAA2, ATP6V0D1	1171	44	16792	6.19222	1.32479e-07
GO:0043547~positive regulation of GTPase activity	82	6.11484	3.36703e-10	ALS2, FGF9, RASGEF1A, ITSN1, MCF2L, STXBP5L, SMAP2, SMAP1, TIAM2, RABGEF1, RANBP1, DENND5B, PLCB1, RAPGEF2, SHC3, ARHGEF4, ARHGEF3, ARHGEF7, MADD, GRIN2A, RAP1GDS1, PSD3, SIPA1L2, ARHGEF9, HERC2, HERC1, ARHGAP26, THY1, ARHGAP32, NDEL1, ADRB1, RASGRF2, STXBP5, SRGAP3, GNB5, GNAS, SNX13, RAPGEFL1, KALRN, ARHGDIG, RALGPS1, CAMK2G, KITLG, CX3CL1, ARFGEF2, FAM13A, MYO9A, FAM13B, PIN1, AMPH, RASAL2, AR…	1171	565	16792	2.08119	1.60559e-07
GO:0017157~regulation of exocytosis	14	1.044	3.77763e-09	SEPT5, SYT1, STX1A, CPLX2, RAB3C, CPLX1, RIMS2, STX1B, PCLO, STXBP5L, STXBP5, VAMP2, RAB26, NSF	1171	26	16792	7.72147	1.57622e-06
GO:0016079~synaptic vesicle exocytosis	13	0.969426	4.16307e-09	RAB3A, CPLX2, CPLX1, PIP5K1C, RIMS1, CDK5, PCLO, CADPS2, TRIM9, DNAJC5, VAMP2, SNAP25, UNC13A	1171	22	16792	8.47357	1.54404e-06
GO:0061003~positive regulation of dendritic spine morphogenesis	11	0.820283	5.64972e-09	TIAM1, PAK3, BAIAP2, LRP8, PAFAH1B1, CAMK2B, CUX2, ITPKA, CAPRIN1, CAPRIN2, KALRN	1171	15	16792	10.5159	1.88587e-06
GO:0048013~ephrin receptor signaling pathway	23	1.71514	6.6231e-08	NGEF, CDK5R1, ROCK2, ARHGEF7, AP2S1, EFNB2, ITSN1, NTRK3, CDC42, EPHA4, AP2A2, EPHB6, PAK3, TIAM1, SIPA1L1, CHN1, EFNA5, PAK1, WASL, DNM1, RASA1, AP2M1, KALRN	1171	86	16792	3.83508	2.00979e-05
GO:0015991~ATP hydrolysis coupled proton transport	14	1.044	8.49977e-08	ATP6AP1, ATP5B, ATP1A3, ATP6V1H, ATP1A1, ATP6V1B2, ATP5G3, ATP6V0B, ATP6V1C1, ATP6V0C, ATP6V1A, ATP6V1E1, ATP6V0A1, ATP6V0D1	1171	32	16792	6.2737	2.36433e-05
GO:0048167~regulation of synaptic plasticity	13	0.969426	7.5545e-07	MEF2C, FGF14, CPEB3, BAIAP2, ITPKA, CDK5, ATP2B2, YWHAG, YWHAH, PLK2, SIPA1L1, PPP3CB, RAPGEF2	1171	32	16792	5.82558	0.000193958
GO:0000165~MAPK cascade	42	3.13199	8.59624e-07	MEF2C, MEF2A, FGF9, CAMK2G, KITLG, RASGEF1A, FGF13, CAMKK2, RASAL2, KRAS, PTK2B, PAK3, RASGRP1, PSMD1, CAMK2D, CAMK2B, PAK1, RAPGEF2, SHC3, NEFL, CAMK2A, RASA1, SCG2, LAMTOR3, BRAF, MAP2K1, NLK, GRIN2A, YWHAB, PSMA1, MAPK1, RASGRF2, MAPK6, PSMD12, PSMA5, SPTBN2, CALM3, PPM1L, RIT2, CALM2, DUSP6, CALM1	1171	262	16792	2.29876	0.000204938
GO:0051056~regulation of small GTPase mediated signal transduction	27	2.01342	1.59063e-06	ARHGDIG, ITSN1, FAM13A, MYO9A, FAM13B, MCF2L, CDC42, TIAM2, ARHGAP44, TIAM1, RAP1GAP2, ARHGEF4, NGEF, ARHGEF3, ABR, ARHGEF7, SIPA1L2, ARHGEF9, ARHGAP26, RALGAPA2, ARHGAP32, RASGRF2, SIPA1L1, SRGAP3, RHOT1, CHN1, KALRN	1171	134	16792	2.88938	0.000353907
GO:0033572~transferrin transport	13	0.969426	2.29541e-06	ATP6AP1, ATP6V1H, ATP6V1G2, ATP6V1B2, ATP6V1D, ATP6V0B, ATP6V0C, ATP6V1C1, ATP6V1A, ATP6V1E1, LMTK2, ATP6V0A1, ATP6V0D1	1171	35	16792	5.32624	0.000478765
GO:0006886~intracellular protein transport	38	2.83371	2.77884e-06	AP1M1, CLTB, STX7, NAPG, TBC1D9, AP2S1, TIMM17A, RABGAP1L, NAPB, RIMS2, RIMS1, AP3M2, KLC1, AP3B2, BCAP29, CHM, STAM, SCG5, VPS35, NSF, APBA1, AP2M1, SEC23A, STX1A, RAN, HERC2, RPH3A, CDK5, STX1B, MYRIP, AP2A2, SGSM1, YWHAH, CHML, IPO5, SLU7, SYTL2, SNX13	1171	236	16792	2.30896	0.000545485
GO:0007264~small GTPase mediated signal transduction	39	2.90828	2.94948e-06	RAB3A, RAB3C, RALGPS1, RASGEF1A, RUNDC3A, RAB40C, ITSN1, CDC42, DIRAS1, KRAS, DIRAS2, ARL15, CHM, RAB11A, RAB6B, RAB26, RAB27B, RAPGEF2, KNDC1, RAB2A, ARL1, ABR, RAN, RAB4A, RAP1GDS1, ARL6, DOCK3, ARHGAP32, RND1, RASGRF2, CHML, ARF3, RAB22A, RHOT1, RAB15, RIT2, ARL4C, NKIRAS1, RAPGEFL1	1171	246	16792	2.2734	0.000546815
GO:0006887~exocytosis	20	1.49142	3.17579e-06	MYO5A, CPLX1, SYT4, SRCIN1, ARFGEF2, RIMS1, LIN7A, STXBP5L, MIA3, ARHGAP44, STXBP5, SYTL2, DNAJC5, SYT16, PAK1, VAMP2, VAMP1, NSF, SCAMP5, MYH10	1171	83	16792	3.45539	0.000557782
GO:0060291~long-term synaptic potentiation	13	0.969426	6.12493e-06	PRKCZ, BRAF, SNCA, GRIN2A, SHANK2, MAPK1, PLK2, PTK2B, SLC24A2, NTRK2, NPTN, VAMP2, SNAP25	1171	38	16792	4.90575	0.00102173
GO:0090383~phagosome acidification	11	0.820283	7.31742e-06	ATP6V0C, ATP6V1C1, ATP6V1A, ATP6V1E1, ATP6V0A1, ATP6V1H, ATP6V1G2, ATP6V1B2, ATP6V0D1, ATP6V1D, ATP6V0B	1171	27	16792	5.84217	0.00116245
GO:0010976~positive regulation of neuron projection development	20	1.49142	9.43503e-06	STMN2, ENC1, KATNB1, UBE2V2, SERPINF1, NDRG4, NME1, PTK2B, CNR1, BCL11A, NTRK2, NPTN, ATP8A2, CNTN1, RANBP1, CAMK2B, RIT2, NCKIPSD, RAPGEF2, NEGR1	1171	89	16792	3.22245	0.00143053
GO:0007156~homophilic cell adhesion via plasma membrane adhesion molecules	28	2.08799	1.22926e-05	PCDHA6, PCDHA7, PCDHA8, PCDHA9, CLSTN2, PCDHA2, CADM2, PCDHA3, PCDHA4, CLSTN1, PCDHA5, PCDHA1, PCDHAC2, PCDHAC1, PCDHA10, PCDHA11, PCDHA12, PCDHA13, PIK3CB, PCDH8, PTPRT, PCDH7, PCDH19, CDH13, CDH18, NPTN, CD200, CDH10	1171	158	16792	2.54124	0.00178246
GO:0043524~negative regulation of neuron apoptotic process	25	1.86428	1.26768e-05	MEF2C, SNCB, GABRB3, GABRB2, SNCA, UBE2V2, ITSN1, PIN1, KRAS, PTK2B, DNAJC5, NEFL, RASA1, OXR1, BRAF, GABRA5, STXBP1, FAM134B, GPI, DLX1, VSTM2L, NTRK2, FAIM2, CACNA1A, CHL1	1171	132	16792	2.71589	0.00176158
GO:0072659~protein localization to plasma membrane	16	1.19314	2.06184e-05	MYO5A, PRKCZ, GPR158, C2CD5, SCN3B, DPP10, STXBP1, CACNB3, FGF13, KCNIP4, BAG4, EPB41L3, RAB11A, SYTL2, RAPGEF2, DPP6	1171	63	16792	3.64187	0.00274921
GO:0034765~regulation of ion transmembrane transport	22	1.64057	2.3362e-05	KCNMA1, KCND3, SCN1A, SCN3A, KCNB1, KCNA2, KCNA1, SCN2A, CACNA2D3, KCNJ3, KCNV1, KCNQ5, KCNJ4, KCNQ3, KCNJ6, KCNJ9, NALCN, NEDD4L, SCN8A, KCNQ2, CACNA1A, CACNA1B	1171	111	16792	2.84214	0.00299486
GO:0035556~intracellular signal transduction	52	3.8777	2.41242e-05	ADCY1, NRG3, ADCY2, TOLLIP, NUAK1, ITSN1, MCF2L, PRKAR2B, TIAM2, GUCY1A2, CAB39, RAPGEF2, PLCB1, AKT3, ARHGEF4, ARHGEF3, SRPK2, MAGI3, NUDT4, ARHGEF7, SOCS7, PRKCE, MARK1, DAPK1, PRKCB, MAST3, MAST4, KSR2, ITGB1BP1, GUCY1B3, UNC13A, KALRN, PRKCZ, RALGPS1, ARFGEF2, MYO9A, PLCL2, DGKE, SNRK, PRKAA2, RASA1, DCLK1, SCG2, GPR155, ABR, NLK, GSK3B, CHN1, DGKZ, RGS7, RIT2, CIT	1171	403	16792	1.85031	0.00297806
GO:0007612~learning	15	1.11857	2.65637e-05	GRM5, PRKAR2B, JPH3, NRXN3, SLC24A2, SLC12A5, SYNJ1, NTRK2, PPP3CB, CNTNAP2, FGF13, NRXN1, ELAVL4, SHANK2, VDAC1	1171	57	16792	3.77365	0.00316181
GO:0048488~synaptic vesicle endocytosis	8	0.59657	5.12029e-05	SYT1, PACSIN1, SYNJ1, SNCA, PIP5K1C, ITSN1, CDK5, SH3GL2	1171	16	16792	7.16994	0.00587644
GO:0050885~neuromuscular process controlling balance	13	0.969426	5.23286e-05	RBFOX1, RBFOX2, ATP2B2, CAMTA1, JPH3, ABR, CNTNAP1, PAFAH1B1, NRXN1, HERC1, NEFL, CACNA1A, MYH10	1171	46	16792	4.05257	0.00580566
GO:0051965~positive regulation of synapse assembly	15	1.11857	7.23506e-05	FLRT3, CLSTN2, NRXN3, CLSTN1, LRRN3, UBE2V2, NRXN1, NTRK3, SLITRK1, SLITRK4, CBLN2, NTRK2, EFNA5, CUX2, SLITRK5	1171	62	16792	3.46933	0.00776054
GO:0015992~proton transport	13	0.969426	0.000102149	SLC2A13, ATP5B, ATP6AP1, ATP6V1G2, ATP6V1B2, SLC35A1, ATP6V1D, ATP6V0B, ATP6V0C, ATP6V1C1, ATP6V1A, ATP6V1E1, ATP6V0D1	1171	49	16792	3.80446	0.0105994
GO:0007409~axonogenesis	19	1.41685	0.000130339	ALS2, RAB3A, ADCY1, CCK, ATL1, BAIAP2, RTN4R, CTNNA2, NRCAM, SLITRK1, LINGO1, SLITRK4, PAK3, GSK3B, ATP8A2, NEFH, PAK1, LRFN5, SLITRK5	1171	98	16792	2.78018	0.0130983
GO:0048813~dendrite morphogenesis	11	0.820283	0.000159176	RBFOX2, MEF2A, BTBD3, ELAVL4, HPRT1, CAMK2A, CDK5, SLITRK5, DCLK1, CACNA1A, CTNNA2	1171	37	16792	4.26321	0.0155071
GO:0031175~neuron projection development	19	1.41685	0.000170197	FLRT3, PTPRK, CDK5R1, NCDN, STMN3, HERC1, CDK5, HDGFRP3, FRY, ATCAY, TBC1D24, PPP1R9A, UNC5A, PTK2B, CNTN1, RAB11A, MAP4, CNTNAP2, RAPGEF2	1171	100	16792	2.72458	0.0161023
GO:0006810~transport	44	3.28113	0.000174974	MYO5A, DYNC1LI1, AP1M1, SLC9A6, GABRB3, SLC20A1, GABRB2, PITPNA, PITPNB, CACNB1, XK, CACNB3, ENSA, ABCA3, STAU2, ATP2B1, ATP2B2, ATCAY, NPTX1, SYNPR, AP3M2, SLC35F1, SLC25A46, SLC25A3, AP2M1, GABRD, GABRG2, GABRA1, TMEM9, SLC12A5, GABRA5, GRIN2A, G3BP2, DYNLT3, GRIA3, GRIA4, HERC1, BICD1, ATP6V1A, SLC25A32, PITPNM3, FABP7, CLCN4, CACNA1B	1171	348	16792	1.81309	0.0160945
GO:0061337~cardiac conduction	12	0.894855	0.000201048	KCNJ4, KCND3, CACNA2D1, MEF2A, CACNG8, CACNB1, CACNB2, CACNG3, CACNB3, KCNK1, CACNA2D3, KCNIP4	1171	45	16792	3.82397	0.0179761
GO:0006816~calcium ion transport	16	1.19314	0.000204183	CACNA2D1, PANX1, CACNG8, CAMK2G, CACNB3, CACNG3, ITPR1, PRKCB, ANXA6, ATP2B2, CAMK2D, RYR2, NALCN, PPP3CA, CAMK2A, CACNA1A	1171	76	16792	3.01892	0.0177778
GO:0048791~calcium ion-regulated exocytosis of neurotransmitter	11	0.820283	0.0002557	SYT1, DOC2A, SYT4, SYT13, SYT16, SYTL2, RPH3A, RIMS2, RIMS1, CACNA1A, RIMS3	1171	39	16792	4.04458	0.0216503
GO:2000463~positive regulation of excitatory postsynaptic potential	8	0.59657	0.000270923	PRKCZ, STX1A, PTK2B, CUX2, NRXN1, RIMS2, STX1B, RIMS1	1171	20	16792	5.73595	0.0223578
GO:2000300~regulation of synaptic vesicle exocytosis	6	0.447427	0.000305113	SEPT5, PFN2, SYN1, RIMS2, RIMS1, RIMS3	1171	10	16792	8.60393	0.0245383
GO:0061001~regulation of dendritic spine morphogenesis	6	0.447427	0.000305113	EPHA4, CDK5R1, PPP1R9A, SRCIN1, SIPA1L1, CDK5	1171	10	16792	8.60393	0.0245383
GO:0001764~neuron migration	19	1.41685	0.000319629	MEF2C, CDK5R1, SATB2, CCK, ASTN1, FZD3, FGF13, CDK5, MARK1, NRCAM, NTRK3, NDEL1, GPM6A, NTRK2, PAFAH1B1, RAPGEF2, CHL1, DCLK1, MYH10	1171	105	16792	2.59484	0.0250869
GO:0016192~vesicle-mediated transport	24	1.78971	0.000345612	MYO5A, SEC23A, AP1M1, STX1A, CLTB, NCALD, AP2S1, AHI1, OPTN, STX1B, RTN3, STXBP5L, AP2A2, AP3M2, STXBP5, AP3B2, SPTBN2, RAB11A, SYTL2, VAMP2, VAMP1, NSF, AP2M1, KALRN	1171	152	16792	2.26419	0.026477
GO:0045921~positive regulation of exocytosis	8	0.59657	0.000382081	RAB3A, CADPS2, STXBP5, ATP6AP1, VSNL1, NCS1, CLASP2, RAB27B	1171	21	16792	5.46281	0.0285753
GO:0018105~peptidyl-serine phosphorylation	21	1.566	0.000393157	PRKCZ, CDK5R1, PDK3, ATR, PRKCE, CDK5, PRKCB, MAST3, MAST4, MAPK1, PLK2, TTBK2, GSK3B, DYRK1A, CAMK2D, LMTK2, MAPK8, CAB39, CAMK2A, DCLK1, AKT3	1171	125	16792	2.4091	0.0287479
GO:0021762~substantia nigra development	12	0.894855	0.000446384	INA, CDC42, YWHAH, FGF9, SEC16A, UCHL1, CALM3, BASP1, SYNGR3, SUDS3, CALM2, CALM1	1171	49	16792	3.51181	0.03188
GO:0086010~membrane depolarization during action potential	9	0.671141	0.000478883	SCN1A, YWHAH, SCN3A, SCN3B, SCN2A, NALCN, SCN8A, CACNA1A, CACNA1B	1171	28	16792	4.60925	0.0334469
GO:0045956~positive regulation of calcium ion-dependent exocytosis	7	0.521999	0.000492411	SYT1, STX1A, SYT4, KCNB1, STXBP1, CDK5, SCAMP5	1171	16	16792	6.2737	0.0336716
GO:0007214~gamma-aminobutyric acid signaling pathway	8	0.59657	0.00052691	PLCL2, GABRG2, GABRA1, GABRB2, GABRA5, GABBR1, GABBR2, CACNA1A	1171	22	16792	5.2145	0.035267

## Sheet: Process 1 G1<-0.01
Transcripts participating in unbalanced process 1 (only those with G1<-0.01*; see Supp. Table 1) were categorized according to GO:
Term	Count	%	PValue	Genes	List Total	Pop Hits	Pop Total	Fold Enrichment	Benjamini
GO:0060333~interferon-gamma-mediated signaling pathway	16	4.08163	1.12296e-11	HLA-DQB1, HLA-DRB1, HLA-DRB3, HLA-A, HLA-B, HLA-E, HLA-G, B2M, NCAM1, CD44, HLA-DRB4, HLA-DRB5, HLA-DPA1, HLA-DPB1, GBP1, HLA-DRA	345	71	16792	10.9684	2.52328e-08		Note: The complete lists showing the transcripts affected by each of the unbalanced processes are shown in Supp. Table 1. Note that the positive and negative G values show correlations and anti-correlations between transcripts. All transcripts assigned positive G values undergo deviations in expression levels that are opposite from the deviations of the transcripts assigned negative G values. The…
GO:0019882~antigen processing and presentation	14	3.57143	5.97114e-11	HLA-DQB1, HLA-DRB1, HLA-DRB3, HLA-A, HLA-B, HLA-E, HLA-G, CD74, AZGP1, HLA-DRB4, HLA-DRB5, HLA-DPA1, HLA-DPB1, HLA-DRA	345	55	16792	12.3894	6.70858e-08
GO:0002504~antigen processing and presentation of peptide or polysaccharide antigen via MHC class II	8	2.04082	2.32294e-08	HLA-DQB1, HLA-DRB1, HLA-DRB3, HLA-DRB4, HLA-DRB5, HLA-DPA1, HLA-DPB1, HLA-DRA	345	17	16792	22.9047	1.73986e-05
GO:0008360~regulation of cell shape	15	3.82653	1.11771e-06	COCH, DLC1, GNA13, PLXNB1, ERMN, ANXA1, RHOQ, RDX, LPAR1, MYO10, S100B, EPS8, MSN, FN1, FGD4	345	140	16792	5.21491	0.000627675
GO:0007422~peripheral nervous system development	7	1.78571	6.97257e-06	EDNRB, SOX10, ERBB3, NFASC, UGT8, PMP22, SOX8	345	24	16792	14.1961	0.00312858
GO:0098609~cell-cell adhesion	19	4.84694	1.28645e-05	SEPT2, KIF5B, CALD1, PDLIM5, WASF2, PKN2, KTN1, RDX, HSPA1A, ANLN, ANXA2, TMEM47, MACF1, BAG3, SPTBN1, DNAJB1, MAPRE1, TJP2, AHNAK	345	271	16792	3.41246	0.0048062
GO:0002480~antigen processing and presentation of exogenous peptide antigen via MHC class I, TAP-independent	5	1.27551	2.01059e-05	HLA-A, HLA-B, HLA-E, HLA-G, B2M	345	9	16792	27.0403	0.00643329
GO:0002381~immunoglobulin production involved in immunoglobulin mediated immune response	4	1.02041	8.26651e-05	HLA-DQB1, HLA-DRB1, HLA-DRB4, HLA-DRB5	345	5	16792	38.938	0.022952
GO:0016045~detection of bacterium	5	1.27551	0.000106906	HLA-DRB1, HLA-DRB4, HLA-A, HLA-DRB5, HLA-B	345	13	16792	18.7202	0.0263393
GO:0019886~antigen processing and presentation of exogenous peptide antigen via MHC class II	10	2.55102	0.000111589	HLA-DQB1, DYNC1LI2, HLA-DRB1, HLA-DRB3, HLA-DRB4, HLA-DRB5, HLA-DPA1, HLA-DPB1, CD74, HLA-DRA	345	92	16792	5.29049	0.0247636
GO:0030334~regulation of cell migration	9	2.29592	0.000132879	GNA13, SGK1, SGK3, ENPP2, CXCR4, PLXNB1, GAB1, C8ORF44-SGK3, SPATA13	345	74	16792	5.91962	0.0267803
GO:0031295~T cell costimulation	9	2.29592	0.000192583	HLA-DQB1, CDC42, HLA-DRB1, HLA-DRB3, HLA-DRB4, HLA-DRB5, HLA-DPA1, HLA-DPB1, HLA-DRA	345	78	16792	5.61605	0.0354221
GO:0042026~protein refolding	5	1.27551	0.000197574	HSPA1L, HSPA1A, HSPA1B, HSPD1, B2M	345	15	16792	16.2242	0.0335766
GO:0030198~extracellular matrix organization	14	3.57143	0.00020789	RECK, SPARC, DCN, SOX9, ITGB1, DDR2, ABI3BP, COL4A5, TTR, DDR1, CD44, VCAN, SPP1, FN1	345	196	16792	3.4766	0.0328191
GO:0007165~signal transduction	43	10.9694	0.000235308	GNA13, DLC1, LITAF, SPOCK3, C3, ERBB3, HLA-DRB3, RTKN, ITPKB, GREM1, SOX9, SOX8, DDR2, CD74, ALCAM, LGALS3BP, DOCK1, PPP1R1B, EVI2A, HLA-DRB4, NDRG2, FGF1, DTNA, SH3GL3, ROCK1, PLXNB1, ANXA1, PKN2, SPARC, ANXA5, CAPN3, RALGDS, STAT3, MYO10, NPC1, RGS1, PENK, EPS8, OPHN1, RAP1A, ANTXR1, SRGAP1, IGFBP5	345	1161	16792	1.80268	0.0346391
GO:0002455~humoral immune response mediated by circulating immunoglobulin	4	1.02041	0.000280602	HLA-DQB1, HLA-DRB1, HLA-DRB4, HLA-DRB5	345	7	16792	27.8128	0.038646
GO:2000427~positive regulation of apoptotic cell clearance	4	1.02041	0.000280602	C4A, C4B_2, C4B, C3	345	7	16792	27.8128	0.038646
GO:0002474~antigen processing and presentation of peptide antigen via MHC class I	6	1.53061	0.000327666	HLA-DQB1, HLA-A, HLA-B, HLA-E, HLA-G, B2M	345	30	16792	9.73449	0.0423921
GO:0042552~myelination	7	1.78571	0.000332049	CLDN5, NFASC, ZNF24, QKI, LPAR1, PMP22, MBP	345	46	16792	7.40668	0.0406101
GO:0006928~movement of cell or subcellular component	9	2.29592	0.000378313	GNA13, CD9, ENPP2, CALD1, VIM, HSPB1, MSN, CERCAM, STAT3	345	86	16792	5.09363	0.0437625
GO:0071901~negative regulation of protein serine/threonine kinase activity	5	1.27551	0.000421895	CDKN1C, PPP1R1B, WNK1, HSPB1, ABL1	345	18	16792	13.5201	0.0463036
GO:0006955~immune response	21	5.35714	0.000451854	HLA-DQB1, HLA-DRB1, ENPP2, C3, IFITM2, HLA-DRB3, IFITM3, HLA-A, HLA-B, HLA-E, C1QC, CD74, MBP, B2M, RGS1, HLA-DRB4, HLA-DRB5, HLA-DPA1, HLA-DPB1, TCF12, HLA-DRA	345	421	16792	2.42784	0.0472086
GO:0007010~cytoskeleton organization	12	3.06122	0.00049211	SEMA6A, DOCK1, MACF1, APOE, SPTBN1, UGT8, MSN, PALLD, SOX9, ADD3, HIP1, FGD4	345	161	16792	3.62776	0.0490319

## Sheet: Process 2 G2>0.01
Transcripts participating in unbalanced process 2 (only those with G2>0.01*; see Supp. Table 1) were categorized according to GO:
Term	Count	%	PValue	Genes	List Total	Pop Hits	Pop Total	Fold Enrichment	Benjamini
GO:0045184~establishment of protein localization	100	8.38223	4.98304e-10	EIF5A, RAB1A, TRAK2, ANK3, VPS13A, SCAMP1, MAPK1, RAB18, RAB14, SRP72, RAB10, RAB7A, SNX9, SDAD1, SNX5, COPZ1, AKAP12, SNX2, SNX3, ABCA1, CDC37, CHMP2B, MACF1, STX17, STX16, TRAM1, RAB8B, PRICKLE1, AKTIP, RABEP1, ARF1, ARF3, TRPS1, ARF4, SPTBN1, YIPF5, SYTL2, COPA, PDIA3, RAB5C, ZMAT3, CANX, RAB3IP, LONP2, AP1S2, RNF103, RANBP2, RAB6A, AGAP1, TPR, KPNB1, AGAP3, KDELR2, RAB39B, RAB4A, PRKCI, IPO9,…	929	769	13528	1.89361	1.55022e-06		Note: The complete lists showing the transcripts affected by each of the unbalanced processes are shown in Supp. Table 1. Note that the positive and negative G values show correlations and anti-correlations between transcripts. All transcripts assigned positive G values undergo deviations in expression levels that are opposite from the deviations of the transcripts assigned negative G values. The…
GO:0008104~protein localization	110	9.22045	6.86698e-10	EIF5A, RAB1A, TRAK2, ANK3, VPS13A, SCAMP1, EGFR, TNKS2, MAPK1, RAB18, RAB14, SRP72, RAB10, RAB7A, SNX9, SDAD1, SNX5, COPZ1, AKAP12, SNX2, SNX3, ABCA1, CDC37, CHMP2B, MACF1, STX17, STX16, TRAM1, SRGN, RAB8B, REEP1, PRICKLE1, AKTIP, RABEP1, ARF1, ARF3, TRPS1, ARF4, SPTBN1, YIPF5, SYTL2, COPA, PDIA3, RAB5C, ZMAT3, NBEA, CANX, RAB3IP, CDC42, LONP2, AP1S2, RNF103, RANBP2, RAB6A, AGAP1, TPR, KPNB1, AGA…	929	882	13528	1.81611	1.06816e-06
GO:0015031~protein transport	98	8.21459	1.39766e-09	EIF5A, RAB1A, TRAK2, VPS13A, SCAMP1, MAPK1, RAB18, RAB14, SRP72, RAB10, RAB7A, SNX9, SDAD1, SNX5, COPZ1, AKAP12, SNX2, SNX3, ABCA1, CDC37, CHMP2B, MACF1, STX17, STX16, TRAM1, RAB8B, PRICKLE1, AKTIP, RABEP1, ARF1, ARF3, TRPS1, ARF4, SPTBN1, YIPF5, SYTL2, COPA, PDIA3, RAB5C, ZMAT3, CANX, RAB3IP, LONP2, AP1S2, RNF103, RANBP2, RAB6A, AGAP1, TPR, KPNB1, AGAP3, KDELR2, RAB39B, RAB4A, PRKCI, IPO9, PRKCB…	929	762	13528	1.87279	1.44937e-06
GO:0046907~intracellular transport	85	7.1249	1.57855e-08	COPA, PDIA3, BNIP3, EIF5A, RAB3IP, APP, AP1S2, LONP2, TRAK2, APOE, PUM1, ANP32A, VPS13A, RANBP2, TPR, KPNB1, AGAP3, PABPN1, SCAMP1, KDELR2, HSP90AA1, KIF5B, PRKCI, IPO9, MAPK1, CAMK4, PSEN1, IPO7, TOMM20, MGEA5, RAB14, SLC25A37, SORT1, KPNA5, SRP72, KPNA4, VAMP2, KPNA3, DST, LRPPRC, STON2, SNX9, YWHAZ, COPZ1, AKAP12, SNX2, ABCA1, DTNBP1, CDC37, SET, MACF1, KLC1, STX17, STX16, BCAP29, SEC22B, VPS3…	929	657	13528	1.88396	1.22771e-05
GO:0022604~regulation of cell morphogenesis	27	2.2632	7.3147e-07	DLC1, RTN4, FERMT2, RHOQ, TTC3, MBP, NRCAM, ACTR3, PTK2, EZR, APOE, ARHGDIA, RASA1, FGD4, PALM2-AKAP2, PTPRF, PLXNB1, MAP1B, GRIN1, GAS7, SLIT2, RUFY3, THY1, NTRK3, YWHAH, PSEN1, FYN, AKAP2	929	131	13528	3.00131	0.000455017
GO:0007264~small GTPase mediated signal transduction	46	3.85583	8.3372e-07	RAB7A, RAB3C, RAB5C, PTPLAD1, RHOQ, ABCA1, RAB1A, CDC42, ARL5A, ARHGAP5, KRAS, APOE, RAB6A, SHC3, RAPGEF2, AGAP1, ARHGDIA, AGAP3, RAB2A, RAP2B, RAP2A, GDI2, RAB8B, ABR, RAB39B, ARHGEF7, RAB4A, NF1, YWHAB, G3BP2, TRIM23, RALGDS, MAPK1, DNAJC27, RAB31, RAB18, ARF1, GNB1, ARF3, KRIT1, ARF4, RAB14, RAB5A, ARL8B, RAB10, ARL4C	929	305	13528	2.19622	0.00043219
GO:0051129~negative regulation of cellular component organization	28	2.34702	1.09216e-06	DLC1, RTN4, HMGB1, SNCA, RHOQ, RDX, CAPZB, TTC3, MBP, CDC42, SBDS, PTK2, SET, SBDSP1, CLASP2, TPR, ARHGDIA, TERF1, APC, PTPRF, MAP1B, RUFY3, THY1, YWHAH, PSEN1, MAP2, SPTBN1, MAPRE1, ADD1	929	142	13528	2.87136	0.000485269
GO:0016071~mRNA metabolic process	52	4.35876	1.27483e-06	PRPF4B, RBM5, SYNCRIP, WTAP, YBX1, NONO, APP, PLRG1, SRRM2, PCBP1, PCBP2, LSM4, QKI, LUC7L3, CCAR1, KHDRBS1, PABPN1, SRPK2, MBNL1, HNRNPR, HNRNPU, PAPD4, SERBP1, CELF2, PRPF38B, POLR2E, POLR2K, POLR2J, TRA2A, HSPA1A, WBP11, HSPA1B, ZFP36L1, HNRNPA3, ZFP36L2, SF3B1, NUDT21, DHX15, PABPC1, HNRNPC, RBM25, SPOP, PRPF40A, RBM22, DHX9, GRSF1, ELAVL1, SSB, PHAX, GSPT1, PNRC2, ZRANB2, RNPC3	929	370	13528	2.04654	0.000495629
GO:0007242~intracellular signaling cascade	130	10.8969	1.3167e-06	IL6ST, RAB1A, MAP3K7, MAP3K5, APOE, GAB1, PIK3CA, PRKACB, RAPGEF2, EGFR, TNIK, PLXNB1, WNK1, ARID1A, MED13, PCLO, FOXN3, SPAG9, MAP4K4, MAPK1, MAP4K5, RAB18, UBR5, RAB14, ARL8B, PIAS1, RAB10, RAB7A, FGFR3, PTPLAD1, ABCA1, ARFGEF2, KRAS, DNAJA1, RNF14, ARHGDIA, FGD4, GPR155, RAB8B, ABR, KLF9, MAP2K4, DUSP22, PTPN11, ARF1, ARF3, RGS4, PRKAR1A, ARF4, ABL1, RAB5C, TOLLIP, PREX1, NCS1, RHOQ, PINK1, CA…	929	1256	13528	1.5072	0.000455037
GO:0070727~cellular macromolecule localization	56	4.69405	1.60856e-06	COPA, PDIA3, EIF5A, RAB3IP, CDC42, LONP2, AP1S2, TRAK2, RANBP2, TPR, KPNB1, AGAP3, EGFR, KDELR2, PRKCI, IPO9, TNKS2, MAPK1, IPO7, MGEA5, TOMM20, SORT1, KPNA5, KPNA4, SRP72, KPNA3, STON2, SNX9, YWHAZ, COPZ1, AKAP12, SNX2, CDC37, STAU1, MACF1, STX17, STX16, BCAP29, TNPO2, TRAM1, TNPO1, SRGN, HSPA9, RBM22, YWHAB, REEP1, YWHAE, YWHAH, ERBB2IP, PRICKLE1, AP2A1, ID1, GSK3B, TRPS1, SPTBN1, SYTL2	929	414	13528	1.96972	0.000500298
GO:0031344~regulation of cell projection organization	21	1.76027	1.84558e-06	RTN4, PTPRF, PLXNB1, GRIN1, MAP1B, RHOQ, SLIT2, RUFY3, MBP, THY1, NRCAM, NTRK3, ACTR3, CDC42, PTK2, YWHAH, PSEN1, APOE, NTRK2, ARHGDIA, APC	929	89	13528	3.43595	0.000521827
GO:0034613~cellular protein localization	55	4.61023	2.80907e-06	COPA, PDIA3, EIF5A, RAB3IP, CDC42, LONP2, AP1S2, TRAK2, RANBP2, TPR, KPNB1, AGAP3, EGFR, KDELR2, PRKCI, IPO9, TNKS2, MAPK1, IPO7, MGEA5, TOMM20, SORT1, KPNA5, KPNA4, SRP72, KPNA3, STON2, SNX9, YWHAZ, COPZ1, AKAP12, SNX2, CDC37, MACF1, STX17, STX16, BCAP29, TNPO2, TRAM1, TNPO1, SRGN, HSPA9, RBM22, YWHAB, REEP1, YWHAE, YWHAH, ERBB2IP, PRICKLE1, AP2A1, ID1, GSK3B, TRPS1, SPTBN1, SYTL2	929	411	13528	1.94867	0.000727988
GO:0010975~regulation of neuron projection development	18	1.5088	3.51882e-06	RTN4, PTPRF, PLXNB1, MAP1B, GRIN1, SLIT2, RUFY3, MBP, THY1, NRCAM, NTRK3, ACTR3, PTK2, YWHAH, PSEN1, APOE, NTRK2, ARHGDIA	929	70	13528	3.74449	0.000841728
GO:0007010~cytoskeleton organization	57	4.77787	3.70734e-06	DLC1, PREX1, FERMT2, RHOQ, DSTN, ACTG1, CDC42, RANBP9, APOE, ANK3, PAK1, DYNC1H1, DLG1, FMNL2, PRKCI, ACTN1, PCM1, PALLD, UBE2B, PCLO, PROX1, ARHGAP26, THY1, EPB41L2, EPB41L3, EPB41L1, TPPP, LIMCH1, DST, ADD1, SGCB, CNN3, CALD1, ABI2, ARPC4, CAPZB, PTK2, EZR, KRAS, BLOC1S2, SORBS1, MACF1, PAFAH1B1, FGD4, CAP2, NF1, MAP1B, RICTOR, CAPN3, GAS7, PPP1R9B, SEMA6A, PPP1R9A, ERBB2IP, MAP2, ABL1, DNAJB6	929	436	13528	1.90373	0.000823486
GO:0008380~RNA splicing	42	3.52054	4.40584e-06	POLR2E, PRPF4B, POLR2K, POLR2J, TRA2A, RBM5, SYNCRIP, WBP11, ZNF638, WTAP, YBX1, NONO, HNRNPA3, SF3B1, PLRG1, SRRM2, PCBP1, PCBP2, NUDT21, DHX15, LSM4, QKI, PABPC1, HNRNPC, RBM25, LUC7L3, CCAR1, PRPF40A, RBM22, PABPN1, SRPK2, DHX9, SNRPN, MBNL1, HNRNPR, SNURF, HNRNPU, PPP1R9B, PHAX, PPIG, ZRANB2, RNPC3, PRPF38B	929	284	13528	2.15352	0.000913356
GO:0030036~actin cytoskeleton organization	36	3.0176	4.60609e-06	DLC1, CNN3, PREX1, CALD1, FERMT2, RHOQ, ABI2, ARPC4, CAPZB, DSTN, ACTG1, CDC42, KRAS, EZR, SORBS1, PAFAH1B1, DLG1, FGD4, FMNL2, NF1, PRKCI, ACTN1, RICTOR, GAS7, CAPN3, PROX1, ARHGAP26, EPB41L2, EPB41L3, PPP1R9B, PPP1R9A, EPB41L1, LIMCH1, ABL1, DST, ADD1	929	226	13528	2.31959	0.000895198
GO:0007268~synaptic transmission	43	3.60436	6.30599e-06	SYT1, GABRB3, GABRB2, SNCA, TAC1, GABBR2, KCNIP2, MBP, APP, SLC1A2, PTK2, FNTA, SYPL1, APOE, SYN2, PAFAH1B1, SHC3, SNAP25, USP14, DTNA, GABRG2, GLRB, GABRA2, PTPRF, SCN2B, KIF5A, GABRA5, GRIN1, ATP1A2, NRXN1, PCLO, VDAC1, ATXN1, SLC17A7, MAPK1, CAMK4, GRIA2, PSEN1, CHRM1, KCNN3, RAB14, CACNA1E, HTR2C	929	298	13528	2.10121	0.00115333
GO:0016192~vesicle-mediated transport	68	5.69992	1.29091e-05	COPA, SYNJ1, SNCA, RAB1A, RAB3IP, RTN3, APP, PICALM, AP1S2, APOE, TRAPPC6B, PUM1, VPS13A, RAB6A, AGAP3, SCAMP1, KDELR2, PRKCI, PI4KB, PCLO, ELMO2, RAB18, PSEN1, RAB5A, RAB14, SORT1, VAMP3, VAMP2, STON2, RAB7A, YWHAZ, CALY, COPZ1, SNX2, SNX3, ABCA1, ARFGEF2, DTNBP1, ARFGEF1, KRAS, TMED2, STX17, OSBPL1A, STX16, BCAP29, SEC22B, VPS35, EXOC5, SNAP25, HSPA8, DCLK1, RHOBTB3, ELMOD1, HIP1, RAB2A, GLRB, …	929	576	13528	1.71911	0.00222866
GO:0010769~regulation of cell morphogenesis involved in differentiation	18	1.5088	1.38928e-05	RTN4, PTPRF, PLXNB1, MAP1B, GRIN1, SLIT2, TTC3, RUFY3, MBP, THY1, NRCAM, NTRK3, ACTR3, PTK2, YWHAH, PSEN1, APOE, ARHGDIA	929	77	13528	3.40408	0.00227219
GO:0051130~positive regulation of cellular component organization	30	2.51467	1.53865e-05	CALY, SNCA, EIF5A, RHOQ, TAC1, DSTN, ACTR3, CDC42, SORBS1, ARPC2, PIK3R1, ARHGDIA, APC, TERF1, HIP1, PTPRF, PLXNB1, CBL, MAP1B, PRKCI, RICTOR, PROX1, SLIT2, TNKS2, UBE2N, NTRK3, MIB1, GSK3B, TPPP, MGEA5	929	181	13528	2.41357	0.00239053
GO:0051493~regulation of cytoskeleton organization	25	2.09556	1.60873e-05	DLC1, RHOQ, TAC1, RDX, CAPZB, DSTN, ACTR3, SBDS, MACF1, ARPC2, SBDSP1, CLASP2, RASA1, APC, TERF1, CCDC88A, MAP1B, RICTOR, PROX1, NEBL, ARPC5L, MAP2, SPTBN1, MAPRE1, DST, ADD1	929	136	13528	2.67682	0.00238039
GO:0006397~mRNA processing	44	3.68818	1.78252e-05	POLR2E, PRPF4B, POLR2K, POLR2J, TRA2A, RBM5, SYNCRIP, WBP11, WTAP, YBX1, NONO, HNRNPA3, SF3B1, APP, PLRG1, SRRM2, PCBP1, PCBP2, NUDT21, DHX15, LSM4, QKI, PABPC1, HNRNPC, LUC7L3, RBM25, SPOP, CCAR1, PRPF40A, KHDRBS1, RBM22, PABPN1, SRPK2, DHX9, GRSF1, MBNL1, HNRNPR, HNRNPU, PHAX, PAPD4, ZRANB2, CELF2, RNPC3, PRPF38B	929	321	13528	1.99602	0.00251749
GO:0007611~learning or memory	22	1.84409	1.81523e-05	EGR1, HMGCR, NF1, GABRA5, GRIN1, CTNND2, ATP1A3, ABI2, TAC1, ATP1A2, CALB1, VDAC1, ATXN1, SBDS, APP, KRAS, PSEN1, FYN, SBDSP1, PTN, PAFAH1B1, SHC3, SNAP25	929	111	13528	2.88614	0.00245231
GO:0030029~actin filament-based process	36	3.0176	1.93603e-05	DLC1, CNN3, PREX1, CALD1, FERMT2, RHOQ, ABI2, ARPC4, CAPZB, DSTN, ACTG1, CDC42, KRAS, EZR, SORBS1, PAFAH1B1, DLG1, FGD4, FMNL2, NF1, PRKCI, ACTN1, RICTOR, GAS7, CAPN3, PROX1, ARHGAP26, EPB41L2, EPB41L3, PPP1R9B, PPP1R9A, EPB41L1, LIMCH1, ABL1, DST, ADD1	929	241	13528	2.17522	0.00250646
GO:0006793~phosphorus metabolic process	101	8.46605	2.29976e-05	PDP1, PRPF4B, SNCA, MAP3K7, MAP3K5, APP, COL4A3BP, GAB1, PIK3CA, PRKACB, EGFR, TWF1, TNIK, PTPRF, WNK1, PPP1CB, MAPK1, MAP4K4, SPAG9, MAP4K5, CAMK4, SCYL2, EIF2S1, FGFR2, FGFR3, PTPLAD1, BMPR2, ATP6V1B2, ACP1, UHMK1, PTK2, FGD4, TAOK1, PTPN5, MAP2K4, AK3, DUSP22, PTPN11, NTRK3, EPHA4, NTRK2, MAP2, SPTBN1, ABL1, PIP4K2A, UQCRC2, CDK17, TOLLIP, SYNJ1, PINK1, CAMKK2, SYNJ2, PAK1, BRD4, ATP6V0D1, SIK…	929	973	13528	1.51156	0.00285777
GO:0006796~phosphate metabolic process	101	8.46605	2.29976e-05	PDP1, PRPF4B, SNCA, MAP3K7, MAP3K5, APP, COL4A3BP, GAB1, PIK3CA, PRKACB, EGFR, TWF1, TNIK, PTPRF, WNK1, PPP1CB, MAPK1, MAP4K4, SPAG9, MAP4K5, CAMK4, SCYL2, EIF2S1, FGFR2, FGFR3, PTPLAD1, BMPR2, ATP6V1B2, ACP1, UHMK1, PTK2, FGD4, TAOK1, PTPN5, MAP2K4, AK3, DUSP22, PTPN11, NTRK3, EPHA4, NTRK2, MAP2, SPTBN1, ABL1, PIP4K2A, UQCRC2, CDK17, TOLLIP, SYNJ1, PINK1, CAMKK2, SYNJ2, PAK1, BRD4, ATP6V0D1, SIK…	929	973	13528	1.51156	0.00285777
GO:0006605~protein targeting	33	2.76614	2.65354e-05	YWHAZ, PDIA3, AKAP12, EIF5A, CDC37, LONP2, MACF1, TRAK2, RANBP2, TPR, TNPO2, TNPO1, KPNB1, TRAM1, HSPA9, RBM22, YWHAB, PRKCI, IPO9, YWHAE, MAPK1, PRICKLE1, ERBB2IP, IPO7, GSK3B, TRPS1, TOMM20, MGEA5, SPTBN1, KPNA5, SRP72, KPNA4, KPNA3	929	215	13528	2.23508	0.00317007
GO:0019226~transmission of nerve impulse	46	3.85583	3.25489e-05	SYT1, GABRB3, GABRB2, SNCA, TAC1, GABBR2, KCNIP2, MBP, SLC1A2, PTK2, APP, FNTA, SYPL1, APOE, SYN2, CNTNAP2, QKI, PAFAH1B1, SHC3, SNAP25, USP14, DTNA, GABRG2, GLRB, GABRA2, PTPRF, SCN2B, KIF5A, NF1, GABRA5, GRIN1, ATP1A2, NRXN1, PCLO, VDAC1, ATXN1, SLC17A7, MAPK1, CAMK4, GRIA2, PSEN1, CHRM1, KCNN3, RAB14, CACNA1E, HTR2C	929	350	13528	1.91385	0.00374339
GO:0006886~intracellular protein transport	48	4.02347	3.89369e-05	STON2, COPA, SNX9, YWHAZ, PDIA3, COPZ1, SNX2, AKAP12, EIF5A, CDC37, AP1S2, LONP2, MACF1, TRAK2, STX17, STX16, BCAP29, RANBP2, TNPO2, TPR, TNPO1, KPNB1, TRAM1, AGAP3, HSPA9, RBM22, KDELR2, YWHAB, PRKCI, IPO9, YWHAE, MAPK1, YWHAH, PRICKLE1, ERBB2IP, IPO7, AP2A1, GSK3B, TRPS1, MGEA5, TOMM20, SPTBN1, SORT1, KPNA5, SYTL2, KPNA4, SRP72, KPNA3	929	374	13528	1.86891	0.00431691
GO:0007612~learning	15	1.25733	4.10441e-05	HMGCR, NF1, GABRA5, GRIN1, CTNND2, ATP1A3, TAC1, ATP1A2, VDAC1, ATXN1, APP, SBDS, KRAS, FYN, SBDSP1, PTN	929	60	13528	3.64047	0.00439345
GO:0016310~phosphorylation	85	7.1249	4.96892e-05	UQCRC2, CDK17, PRPF4B, TOLLIP, SNCA, PINK1, CAMKK2, MAP3K7, MAP3K5, APP, COL4A3BP, GAB1, PIK3CA, PAK1, BRD4, PRKACB, ATP6V0D1, AKT3, SIK3, EGFR, SRPK2, TWF1, CTBP1, TNIK, SGK3, PIK3C2A, PRKCI, WNK1, CDK6, PI4KB, PRKCE, ATP6V1D, PRKCB, ATP6V1C1, MAPK1, SPAG9, MAP4K4, ATP6V1A, MAP4K5, HIPK1, PSEN1, CAMK4, SCYL2, EIF2S1, HIPK2, CAMK1D, FGFR2, FGFR3, PTPLAD1, BMPR2, ABI2, ABI1, ATP6V1B2, UHMK1, IGF1R…	929	800	13528	1.5472	0.00513964
GO:0042981~regulation of apoptosis	85	7.1249	6.08401e-05	DLC1, RTN4, MEF2C, SNCB, CADM1, PDIA3, PREX1, ZMAT3, SNCA, RBM5, BNIP3, EIF5A, FOXO3, MAP3K7, MAP3K5, APP, FNTA, APOE, TIA1, PIK3CA, FOXO3B, ARHGEF4, EGFR, SGK3, PTPRF, ARHGEF7, PRKCI, ACTN1, MBD4, PRKCE, MAPK1, HIPK1, PSEN1, BTG1, HIPK2, SORT1, CTSB, PRNP, CAMK1D, HMGB1, BCLAF1, ING3, YWHAZ, MCL1, XIAP, TAF9B, BCL2L2, HSPA1A, HSPA1B, SOX9, SERINC3, SLC11A2, PEA15, IGF1R, PRUNE2, KRAS, AKT1S1, BL…	929	804	13528	1.5395	0.00608718
GO:0043488~regulation of mRNA stability	9	0.754401	6.39327e-05	ZFP36L1, ZFP36L2, DHX9, SERBP1, ELAVL1, SYNCRIP, PABPC1, HNRNPU, YBX1	929	22	13528	5.95714	0.00619638
GO:0048666~neuron development	44	3.68818	6.62178e-05	SEPT2, STRN, ABI2, RORB, KCNIP2, ALCAM, NRCAM, IGF1R, APP, PTK2, MACF1, ANK3, BCL11B, CNTNAP2, PAFAH1B1, SNAP25, DCLK1, APC, EGFR, ACTB, GNAO1, CREB1, MAP1B, KIF5C, LIFR, PRKCI, NRXN1, GAS7, SLIT2, THY1, PTPN11, PPP1R9B, EPHA4, SEMA6A, PSEN1, GNAQ, NTRK2, MAP2, VCAN, EFNA5, BMPR1B, DST, FEZ2, NTM	929	339	13528	1.89004	0.00622329
GO:0007167~enzyme linked receptor protein signaling pathway	44	3.68818	8.13046e-05	FGFR2, ZFAND5, REPS2, FGFR3, IL6ST, BMPR2, RHOQ, ABI1, FKBP1A, MAP3K7, IGF1R, UBE2D3, PTK2, FNTA, SORBS1, GAB1, PTN, SHC3, FGF1, PIK3R1, TXNIP, EGFR, PTPRD, PTPRF, CREB1, NLK, CBL, SMAD5, LIFR, DUSP22, APPL1, STAT3, PTPN11, NTRK3, EPHA4, ERBB2IP, ID1, HIPK2, ARF4, NTRK2, MAPK8IP2, SORT1, SPTBN1, BMPR1B	929	342	13528	1.87346	0.00741207
GO:0043067~regulation of programmed cell death	85	7.1249	8.47951e-05	DLC1, RTN4, MEF2C, SNCB, CADM1, PDIA3, PREX1, ZMAT3, SNCA, RBM5, BNIP3, EIF5A, FOXO3, MAP3K7, MAP3K5, APP, FNTA, APOE, TIA1, PIK3CA, FOXO3B, ARHGEF4, EGFR, SGK3, PTPRF, ARHGEF7, PRKCI, ACTN1, MBD4, PRKCE, MAPK1, HIPK1, PSEN1, BTG1, HIPK2, SORT1, CTSB, PRNP, CAMK1D, HMGB1, BCLAF1, ING3, YWHAZ, MCL1, XIAP, TAF9B, BCL2L2, HSPA1A, HSPA1B, SOX9, SERINC3, SLC11A2, PEA15, IGF1R, PRUNE2, KRAS, AKT1S1, BL…	929	812	13528	1.52434	0.00750906
GO:0010941~regulation of cell death	85	7.1249	9.59487e-05	DLC1, RTN4, MEF2C, SNCB, CADM1, PDIA3, PREX1, ZMAT3, SNCA, RBM5, BNIP3, EIF5A, FOXO3, MAP3K7, MAP3K5, APP, FNTA, APOE, TIA1, PIK3CA, FOXO3B, ARHGEF4, EGFR, SGK3, PTPRF, ARHGEF7, PRKCI, ACTN1, MBD4, PRKCE, MAPK1, HIPK1, PSEN1, BTG1, HIPK2, SORT1, CTSB, PRNP, CAMK1D, HMGB1, BCLAF1, ING3, YWHAZ, MCL1, XIAP, TAF9B, BCL2L2, HSPA1A, HSPA1B, SOX9, SERINC3, SLC11A2, PEA15, IGF1R, PRUNE2, KRAS, AKT1S1, BL…	929	815	13528	1.51873	0.00825768
GO:0044087~regulation of cellular component biogenesis	24	2.01174	9.60093e-05	DLC1, HMGB1, GRIN1, MAP1B, TAC1, RHOQ, RDX, RICTOR, PROX1, CAPZB, ACTR3, CDC42, PTK2, ARPC2, GSK3B, ARPC5L, TPPP, SPTBN1, MAPRE1, SNAP25, RASA1, ADD1, TERF1, APC	929	142	13528	2.46117	0.00804045
GO:0045664~regulation of neuron differentiation	23	1.92791	9.83104e-05	RTN4, PTPRF, PLXNB1, GRIN1, MAP1B, TIMP2, SLIT2, TTC3, RUFY3, MBP, THY1, NRCAM, NTRK3, ACTR3, MIB1, PTK2, YWHAH, PSEN1, APOE, NTRK2, ID4, PBX1, ARHGDIA	929	133	13528	2.51822	0.0080166
GO:0050770~regulation of axonogenesis	14	1.17351	9.88155e-05	RTN4, PLXNB1, MAP1B, GRIN1, RUFY3, SLIT2, THY1, MBP, NTRK3, NRCAM, PTK2, PSEN1, APOE, ARHGDIA	929	57	13528	3.57661	0.00785184
GO:0010608~posttranscriptional regulation of gene expression	31	2.59849	0.000110477	DICER1, EIF5, SYNCRIP, EIF5A, YBX1, ZFP36L1, ZFP36L2, APP, TIA1, PUM1, QKI, PUM2, PABPC1, TNRC6B, TNRC6A, DNAJC1, DHX9, PAIP2, ELAVL1, SELT, UBE2B, HNRNPU, EIF4G1, SARNP, MAPK1, EIF4G3, EIF4E, DIO2, SERBP1, EIF2S1, HSPD1	929	211	13528	2.13943	0.00855599
GO:0043487~regulation of RNA stability	9	0.754401	0.000129988	ZFP36L1, ZFP36L2, DHX9, SERBP1, ELAVL1, SYNCRIP, PABPC1, HNRNPU, YBX1	929	24	13528	5.46071	0.00981541
GO:0032268~regulation of cellular protein metabolic process	55	4.61023	0.00015507	HSP90AB1, DLC1, IL6ST, SNCA, EIF5, EIF5A, APP, MAP3K5, FNTA, APOE, TIA1, GAB1, PSMD1, PUM1, QKI, PUM2, PAK1, DNAJC1, EGFR, CCDC88A, ANAPC5, PRKCE, UBE2N, EIF4G1, SARNP, MAPK1, MAP4K5, EIF4G3, PSEN1, EIF2S1, MGEA5, PIAS1, PTPLAD1, BMPR2, FKBP1A, ZFP36L1, SET, RB1CC1, TNRC6B, TNRC6A, BUB3, FGD4, PAIP2, YWHAB, NDFIP1, NDFIP2, RICTOR, YWHAE, SELT, PPP1R9B, EIF4E, DIO2, PSMC3, PRKAR1A, MAPK8IP1	929	474	13528	1.68967	0.0114215
GO:0032990~cell part morphogenesis	35	2.93378	0.000155655	ARPC4, RAB3IP, ALCAM, NRCAM, IGF1R, APP, PTK2, MACF1, ANK3, BCL11B, COL4A3BP, PAFAH1B1, SNAP25, DCLK1, APC, EGFR, ACTB, DNM1L, KIF3A, CREB1, MAP1B, KIF5C, LIFR, NRXN1, PCM1, GAS7, SLIT2, PTPN11, SEMA6A, EPHA4, EFNA5, VCAN, BMPR1B, DST, FEZ2	929	256	13528	1.99088	0.0111991
GO:0031175~neuron projection development	35	2.93378	0.000155655	SEPT2, STRN, ABI2, NRCAM, ALCAM, IGF1R, APP, PTK2, MACF1, ANK3, BCL11B, PAFAH1B1, SNAP25, DCLK1, APC, EGFR, ACTB, GNAO1, CREB1, MAP1B, KIF5C, LIFR, NRXN1, GAS7, SLIT2, PTPN11, PPP1R9B, SEMA6A, EPHA4, MAP2, EFNA5, VCAN, BMPR1B, DST, FEZ2	929	256	13528	1.99088	0.0111991
GO:0006913~nucleocytoplasmic transport	25	2.09556	0.000155859	PABPN1, RBM22, PDIA3, EIF5A, IPO9, ATXN1, PHAX, MAPK1, SET, CAMK4, PRICKLE1, IPO7, GSK3B, TRPS1, ANP32A, SPTBN1, KPNA5, RANBP2, KPNA4, TPR, KPNA3, TNPO2, TNPO1, KPNB1, HSPA9	929	156	13528	2.33364	0.0109603
GO:0032989~cellular component morphogenesis	48	4.02347	0.000167624	ARPC4, SOX9, RAB3IP, ALCAM, ACTG1, NRCAM, CDC42, IGF1R, PTK2, APP, EZR, MACF1, ANK3, BCL11B, COL4A3BP, PAFAH1B1, CLASP2, SNAP25, DCLK1, DLG1, APC, ACTB, EGFR, CAP2, DNM1L, KIF3A, CREB1, MAP1B, KIF5C, LIFR, PRKCI, NRXN1, PCM1, PROX1, CAPN3, GAS7, UBE2B, SLIT2, PTPN11, EPHA4, SEMA6A, ERBB2IP, VCAN, EFNA5, BMPR1B, DST, FEZ2, ADD1	929	397	13528	1.76063	0.0115225
GO:0033043~regulation of organelle organization	31	2.59849	0.000183613	DLC1, SNCA, RHOQ, TAC1, RDX, CAPZB, DSTN, ACTR3, CDC42, SBDS, SET, MACF1, ARPC2, SBDSP1, CLASP2, TPR, RASA1, APC, TERF1, CCDC88A, MAP1B, RICTOR, PROX1, TNKS2, NEBL, UBE2N, ARPC5L, MAP2, SPTBN1, MAPRE1, DST, ADD1	929	217	13528	2.08027	0.0123422
GO:0051169~nuclear transport	25	2.09556	0.000190269	PABPN1, RBM22, PDIA3, EIF5A, IPO9, ATXN1, PHAX, MAPK1, SET, CAMK4, PRICKLE1, IPO7, GSK3B, TRPS1, ANP32A, SPTBN1, KPNA5, RANBP2, KPNA4, TPR, KPNA3, TNPO2, TNPO1, KPNB1, HSPA9	929	158	13528	2.3041	0.0125164
GO:0000902~cell morphogenesis	44	3.68818	0.000201566	ARPC4, SOX9, RAB3IP, ALCAM, NRCAM, CDC42, IGF1R, APP, PTK2, EZR, MACF1, ANK3, BCL11B, COL4A3BP, PAFAH1B1, CLASP2, SNAP25, DCLK1, DLG1, APC, EGFR, ACTB, CAP2, KIF3A, CREB1, MAP1B, KIF5C, LIFR, PRKCI, NRXN1, PCM1, PROX1, GAS7, SLIT2, PTPN11, EPHA4, SEMA6A, ERBB2IP, VCAN, EFNA5, BMPR1B, DST, FEZ2, ADD1	929	356	13528	1.79978	0.0129803
GO:0030030~cell projection organization	45	3.772	0.000214901	SEPT2, STRN, ABI2, ARPC4, RDX, CAPZB, RAB3IP, ALCAM, NRCAM, CDC42, IGF1R, PTK2, APP, MACF1, ANK3, BCL11B, PAFAH1B1, SNAP25, DCLK1, FGD4, APC, EGFR, ACTB, GNAO1, CCDC88A, KIF3A, CREB1, MAP1B, KIF5C, LIFR, NRXN1, PCM1, UBE2B, GAS7, SLIT2, PTPN11, PPP1R9B, EPHA4, SEMA6A, MAP2, VCAN, EFNA5, BMPR1B, DST, FEZ2	929	368	13528	1.78067	0.0135528
GO:0007156~homophilic cell adhesion	22	1.84409	0.000220622	PCDHA6, PCDHA7, CADM3, PCDHA8, PCDHA9, CADM1, PCDHA2, PCDHA3, PCDHA4, PCDHA5, PCDHGA6, PCDHGA5, PCDHGC3, PCDHA1, PCDHGA3, PCDHAC2, PCDHAC1, PCDHA10, PCDHA11, PCDHA12, PCDHA13, PCDHGA12, PCDHGA10, PCDHGA11, PTPRF, PCDH10, PCDH9, PCDH17	929	131	13528	2.44551	0.0136348
GO:0019941~modification-dependent protein catabolic process	63	5.2808	0.000231872	TMEM189-UBE2V1, KIAA0368, RLIM, ERLEC1, ZYG11B, MAP1LC3B, WWP1, PSMD1, USP11, DDA1, RANBP2, FBXO21, FBXL16, USP14, TBL1XR1, ANAPC5, ENC1, UBR3, UBE2H, TMEM189, UBE2B, UBE2N, PJA2, MIB1, DCUN1D1, HUWE1, UBE2K, UBR5, UBE2M, PIAS1, PCYOX1, UBE2S, USP7, UBE2Z, XIAP, ATG12, RAD23A, UBE2V1, UBE2V2, EDEM3, UBE2R2, SUMO3, SUMO2, UBE2D3, FBXW7, ARIH2, UFM1, USP34, USP33, RNF14, BUB3, FBXO45, USP31, SPOP, …	929	574	13528	1.59826	0.0140463
GO:0043632~modification-dependent macromolecule catabolic process	63	5.2808	0.000231872	TMEM189-UBE2V1, KIAA0368, RLIM, ERLEC1, ZYG11B, MAP1LC3B, WWP1, PSMD1, USP11, DDA1, RANBP2, FBXO21, FBXL16, USP14, TBL1XR1, ANAPC5, ENC1, UBR3, UBE2H, TMEM189, UBE2B, UBE2N, PJA2, MIB1, DCUN1D1, HUWE1, UBE2K, UBR5, UBE2M, PIAS1, PCYOX1, UBE2S, USP7, UBE2Z, XIAP, ATG12, RAD23A, UBE2V1, UBE2V2, EDEM3, UBE2R2, SUMO3, SUMO2, UBE2D3, FBXW7, ARIH2, UFM1, USP34, USP33, RNF14, BUB3, FBXO45, USP31, SPOP, …	929	574	13528	1.59826	0.0140463
GO:0030182~neuron differentiation	51	4.27494	0.000254063	SEPT2, TUBB2B, TUBB2A, STRN, RORB, KCNIP2, NRCAM, CDC42, APP, ANK3, CNTNAP2, EGFR, KIF5C, PRKCI, LIFR, NRXN1, SLIT2, THY1, GNAQ, PSEN1, VCAN, EFNA5, DST, ABI2, ALCAM, IGF1R, PTK2, MACF1, BCL11B, NGRN, PAFAH1B1, SNAP25, DCLK1, APC, ACTB, GNAO1, CREB1, MAP1B, GAS7, STAT3, PTPN11, NTRK3, PPP1R9B, EPHA4, SEMA6A, MAP2, NTRK2, ID4, BMPR1B, FEZ2, NTM	929	438	13528	1.69556	0.0150868
GO:0048858~cell projection morphogenesis	33	2.76614	0.000325744	ARPC4, RAB3IP, NRCAM, ALCAM, IGF1R, APP, PTK2, MACF1, ANK3, BCL11B, PAFAH1B1, SNAP25, DCLK1, APC, EGFR, ACTB, KIF3A, CREB1, MAP1B, KIF5C, LIFR, NRXN1, PCM1, GAS7, SLIT2, PTPN11, SEMA6A, EPHA4, EFNA5, VCAN, BMPR1B, DST, FEZ2	929	245	13528	1.9614	0.018942
GO:0007015~actin filament organization	15	1.25733	0.000327413	CALD1, PREX1, PRKCI, ABI2, ACTN1, ARPC4, PROX1, GAS7, DSTN, PPP1R9B, PPP1R9A, EZR, SORBS1, ADD1, DLG1	929	72	13528	3.03373	0.0186889
GO:0051789~response to protein stimulus	19	1.59262	0.000332112	EGR1, HSP90AB1, HSP90AA1, MAP1B, HSPA1A, HSPA1B, EDEM3, TTC3, ACTR3, HSPH1, FNTA, ID2, ID1, DNAJA1, DNAJB1, HSPD1, DNAJB4, UBXN4, DNAJB6, HSPA8	929	107	13528	2.58576	0.0186132
GO:0006468~protein amino acid phosphorylation	70	5.86756	0.000360261	CDK17, PRPF4B, PINK1, CAMKK2, MAP3K7, MAP3K5, APP, COL4A3BP, GAB1, PIK3CA, PAK1, BRD4, PRKACB, SIK3, AKT3, EGFR, SRPK2, TWF1, CTBP1, TNIK, SGK3, PRKCI, WNK1, CDK6, PRKCE, PRKCB, MAPK1, SPAG9, MAP4K4, MAP4K5, HIPK1, PSEN1, CAMK4, SCYL2, EIF2S1, HIPK2, CAMK1D, FGFR2, FGFR3, PTPLAD1, BMPR2, ABI2, ABI1, UHMK1, IGF1R, PTK2, CAMK2D, CAMK2B, DCLK1, FGD4, CSNK1A1, TAOK1, PDK3, NLK, CREB1, PDK4, MAP2K4, P…	929	667	13528	1.52823	0.0198184
GO:0043254~regulation of protein complex assembly	17	1.42498	0.000369688	HMGB1, MAP1B, RDX, RICTOR, CAPZB, ACTR3, CDC42, ARPC2, GSK3B, ARPC5L, TPPP, SPTBN1, MAPRE1, RASA1, ADD1, APC, TERF1	929	90	13528	2.75058	0.0199786
GO:0031345~negative regulation of cell projection organization	9	0.754401	0.000429573	RTN4, PTK2, YWHAH, PSEN1, PTPRF, ARHGDIA, RUFY3, MBP, THY1	929	28	13528	4.68061	0.0227828
GO:0051603~proteolysis involved in cellular protein catabolic process	64	5.36463	0.000440675	TMEM189-UBE2V1, KIAA0368, RLIM, ERLEC1, ZYG11B, MAP1LC3B, WWP1, PSMD1, USP11, DDA1, RANBP2, FBXO21, FBXL16, USP14, TBL1XR1, ANAPC5, ENC1, UBR3, UBE2H, TMEM189, UBE2B, UBE2N, PJA2, MIB1, DCUN1D1, HUWE1, PSEN1, UBE2K, UBR5, UBE2M, PIAS1, PCYOX1, UBE2S, USP7, UBE2Z, XIAP, ATG12, RAD23A, UBE2V1, UBE2V2, EDEM3, UBE2R2, SUMO3, SUMO2, UBE2D3, FBXW7, ARIH2, UFM1, USP34, USP33, RNF14, BUB3, FBXO45, USP31,…	929	600	13528	1.55327	0.0229734
GO:0006892~post-Golgi vesicle-mediated transport	13	1.08969	0.000476541	SCAMP1, AP1S2, ARF1, AP2A1, PUM1, RAB14, SORT1, VPS13A, EXOC5, VAMP2, DTNBP1, RAB3IP, HSPA8	929	58	13528	3.26387	0.0244116
GO:0044257~cellular protein catabolic process	64	5.36463	0.000497835	TMEM189-UBE2V1, KIAA0368, RLIM, ERLEC1, ZYG11B, MAP1LC3B, WWP1, PSMD1, USP11, DDA1, RANBP2, FBXO21, FBXL16, USP14, TBL1XR1, ANAPC5, ENC1, UBR3, UBE2H, TMEM189, UBE2B, UBE2N, PJA2, MIB1, DCUN1D1, HUWE1, PSEN1, UBE2K, UBR5, UBE2M, PIAS1, PCYOX1, UBE2S, USP7, UBE2Z, XIAP, ATG12, RAD23A, UBE2V1, UBE2V2, EDEM3, UBE2R2, SUMO3, SUMO2, UBE2D3, FBXW7, ARIH2, UFM1, USP34, USP33, RNF14, BUB3, FBXO45, USP31,…	929	603	13528	1.54554	0.0250761
GO:0043244~regulation of protein complex disassembly	12	1.00587	0.000559848	SBDS, MAP2, MAP1B, SBDSP1, MGEA5, EIF5A, SPTBN1, RDX, CLASP2, CAPZB, ADD1, DSTN, APC	929	51	13528	3.42633	0.0277085
GO:0032271~regulation of protein polymerization	14	1.17351	0.000627817	MAP1B, RDX, RICTOR, CAPZB, ACTR3, ARPC2, TPPP, ARPC5L, SPTBN1, MAPRE1, RASA1, ADD1, APC, TERF1	929	68	13528	2.99804	0.030536
GO:0090003~regulation of establishment of protein localization to plasma membrane	5	0.419111	0.000651105	SORBS1, PRKCI, RHOQ, APPL1, PIK3R1	929	7	13528	10.4014	0.0311642
GO:0043066~negative regulation of apoptosis	42	3.52054	0.000667617	MEF2C, HMGB1, YWHAZ, MCL1, SNCB, XIAP, SNCA, TAF9B, BNIP3, BCL2L2, HSPA1A, HSPA1B, MAP3K7, PEA15, IGF1R, KRAS, FNTA, AKT1S1, APOE, BCL11B, RB1CC1, PIK3CA, HSPA5, RASA1, ARHGDIA, HSPA9, SCG2, APC, EGFR, SGK3, TMBIM6, GRIN1, PRKCI, SON, HSP90B1, PSEN1, GSK3B, HIPK2, BNIP3L, SORT1, MAPK8IP1, HSPD1, PRNP	929	354	13528	1.72768	0.0314584
GO:0030163~protein catabolic process	65	5.44845	0.000672707	TMEM189-UBE2V1, KIAA0368, RLIM, ERLEC1, ZYG11B, TPP1, MAP1LC3B, WWP1, PSMD1, USP11, DDA1, RANBP2, FBXO21, FBXL16, USP14, TBL1XR1, ANAPC5, ENC1, UBR3, UBE2H, TMEM189, UBE2B, UBE2N, PJA2, MIB1, DCUN1D1, HUWE1, PSEN1, UBE2K, UBR5, UBE2M, PIAS1, PCYOX1, UBE2S, USP7, UBE2Z, XIAP, ATG12, RAD23A, UBE2V1, UBE2V2, EDEM3, UBE2R2, SUMO3, SUMO2, UBE2D3, FBXW7, ARIH2, UFM1, USP34, USP33, RNF14, BUB3, FBXO45, …	929	622	13528	1.52174	0.0312219
GO:0048812~neuron projection morphogenesis	29	2.43085	0.000676943	NRCAM, ALCAM, IGF1R, APP, PTK2, MACF1, ANK3, BCL11B, PAFAH1B1, SNAP25, DCLK1, APC, EGFR, ACTB, CREB1, KIF5C, MAP1B, LIFR, NRXN1, GAS7, SLIT2, PTPN11, SEMA6A, EPHA4, EFNA5, VCAN, BMPR1B, DST, FEZ2	929	213	13528	1.98261	0.0309538
GO:0006606~protein import into nucleus	16	1.34116	0.000687464	RBM22, PDIA3, IPO9, MAPK1, PRICKLE1, IPO7, TRPS1, SPTBN1, KPNA5, KPNA4, RANBP2, KPNA3, TNPO2, TPR, TNPO1, KPNB1	929	86	13528	2.70919	0.0309725
GO:0051170~nuclear import	16	1.34116	0.000880936	RBM22, PDIA3, IPO9, MAPK1, PRICKLE1, IPO7, TRPS1, SPTBN1, KPNA5, KPNA4, RANBP2, KPNA3, TNPO2, TPR, TNPO1, KPNB1	929	88	13528	2.64762	0.0389571
GO:0043069~negative regulation of programmed cell death	42	3.52054	0.000881627	MEF2C, HMGB1, YWHAZ, MCL1, SNCB, XIAP, SNCA, TAF9B, BNIP3, BCL2L2, HSPA1A, HSPA1B, MAP3K7, PEA15, IGF1R, KRAS, FNTA, AKT1S1, APOE, BCL11B, RB1CC1, PIK3CA, HSPA5, RASA1, ARHGDIA, HSPA9, SCG2, APC, EGFR, SGK3, TMBIM6, GRIN1, PRKCI, SON, HSP90B1, PSEN1, GSK3B, HIPK2, BNIP3L, SORT1, MAPK8IP1, HSPD1, PRNP	929	359	13528	1.70362	0.038441
GO:0007632~visual behavior	9	0.754401	0.000907231	ATXN1, APP, SLC1A2, KRAS, HMGCR, NF1, GRIN1, ATP1A3, ATP1A2	929	31	13528	4.22765	0.0389896
GO:0031110~regulation of microtubule polymerization or depolymerization	9	0.754401	0.000907231	SBDS, MACF1, MAP2, MAP1B, SBDSP1, CLASP2, MAPRE1, DST, TERF1, APC	929	31	13528	4.22765	0.0389896
GO:0060548~negative regulation of cell death	42	3.52054	0.000938357	MEF2C, HMGB1, YWHAZ, MCL1, SNCB, XIAP, SNCA, TAF9B, BNIP3, BCL2L2, HSPA1A, HSPA1B, MAP3K7, PEA15, IGF1R, KRAS, FNTA, AKT1S1, APOE, BCL11B, RB1CC1, PIK3CA, HSPA5, RASA1, ARHGDIA, HSPA9, SCG2, APC, EGFR, SGK3, TMBIM6, GRIN1, PRKCI, SON, HSP90B1, PSEN1, GSK3B, HIPK2, BNIP3L, SORT1, MAPK8IP1, HSPD1, PRNP	929	360	13528	1.69889	0.0397522
GO:0050767~regulation of neurogenesis	24	2.01174	0.000965169	RTN4, PTPRF, PLXNB1, NF1, GRIN1, MAP1B, TIMP2, SLIT2, TTC3, RUFY3, MBP, THY1, NRCAM, NTRK3, ACTR3, MIB1, PTK2, YWHAH, PSEN1, APOE, NTRK2, ID4, PBX1, ARHGDIA	929	166	13528	2.10533	0.0403167
GO:0033365~protein localization in organelle	22	1.84409	0.000971589	RBM22, YWHAZ, PDIA3, IPO9, RAB3IP, MAPK1, MACF1, PRICKLE1, IPO7, TRPS1, TOMM20, SPTBN1, KPNA5, SRP72, RANBP2, KPNA4, TPR, KPNA3, TNPO2, TNPO1, KPNB1, SRGN	929	146	13528	2.19426	0.0400422
GO:0032956~regulation of actin cytoskeleton organization	16	1.34116	0.000993788	DLC1, CCDC88A, TAC1, RHOQ, RDX, RICTOR, CAPZB, PROX1, DSTN, NEBL, ACTR3, ARPC2, ARPC5L, SPTBN1, RASA1, ADD1	929	89	13528	2.61787	0.0404039
GO:0006457~protein folding	25	2.09556	0.00102997	HSP90AB1, COPA, DNAJB14, CCT2, FKBP1A, CANX, BAG5, DNAJC18, DNAJC12, DNAJA1, RANBP2, DNAJA4, HSPA8, DNAJC1, DNAJA2, HSPA9, HSP90AA1, DNAJC21, NKTR, HSP90B1, PPIG, HSPD1, DNAJB1, DNAJB4, DNAJB6	929	177	13528	2.05676	0.0413055
GO:0032880~regulation of protein localization	21	1.76027	0.0011547	RBP4, SEPT2, CADM1, NF1, YWHAB, NDFIP1, G3BP2, PRKCI, NDFIP2, RHOQ, APPL1, UHMK1, PTPN11, SORBS1, GSK3B, RAB14, SRGN, PIK3R1, ARHGDIA, DNAJC1, APC	929	138	13528	2.21594	0.0456072
GO:0016337~cell-cell adhesion	34	2.84996	0.0012667	PCDHA6, PCDHA7, PCDHA8, CADM3, PCDHA9, CADM1, PCDHA2, PCDHA3, PCDHA4, PCDHA5, CTNND2, PCDHGA6, PCDHGA5, PCDHA1, PCDHGC3, SOX9, PCDHGA3, PCDHAC2, PCDHAC1, NRCAM, EZR, PCDHA10, PCDHA11, PCDHA12, PCDHA13, DLG1, EGFR, PCDHGA12, PCDHGA10, PCDHGA11, PTPRF, PCDH10, PCDH9, PCDH17, CD164, CTNNA3, THY1, NCAM1, PSEN1, BMPR1B	929	276	13528	1.79386	0.0492975
GO:0010639~negative regulation of organelle organization	15	1.25733	0.00127203	DLC1, SNCA, MAP1B, RDX, CAPZB, SBDS, SET, MAP2, SBDSP1, SPTBN1, CLASP2, MAPRE1, TPR, ADD1, APC, TERF1	929	82	13528	2.66376	0.0488887
GO:0010721~negative regulation of cell development	11	0.922045	0.00131361	RTN4, PTK2, YWHAH, PSEN1, NF1, ID4, TTC3, ARHGDIA, RUFY3, MBP, THY1	929	48	13528	3.3371	0.049832

## Sheet: Process 2 G2<-0.01
Transcripts participating in unbalanced process 2 (only those with G2<-0.01*; see Supp. Table 1) were categorized according to GO:
No enriched biological categories were assigned

## Sheet: Process 3 G3>0.01
Transcripts participating in unbalanced process 3 (only those with G3>0.01*; see Supp. Table 1) were categorized according to GO:
Term	Count	%	PValue	Genes	List Total	Pop Hits	Pop Total	Fold Enrichment	Benjamini
GO:0007399~nervous system development	40	8.23045	7.57512e-18	PCDHA6, MEF2C, PCDHA7, GDA, PCDHA8, CPLX2, PCDHA2, PCDHA3, SCN3B, PCDHA4, CAMK2G, PCDHA5, L1CAM, PCDHA1, NRN1, PCDHAC2, PCDHAC1, SRRM4, LY6H, PCDHA10, VPS13A, PCDHA11, DLG2, DCLK1, OLFM1, RBFOX1, RBFOX2, ARHGEF7, ENC1, MAP1B, GAS7, DOC2A, CHRM3, GSK3A, OPHN1, EFNA5, NRGN, NEUROD6, FEZ2, KALRN	428	287	16792	5.4681	1.51048e-14		Note: The complete lists showing the transcripts affected by each of the unbalanced processes are shown in Supp. Table 1. Note that the positive and negative G values show correlations and anti-correlations between transcripts. All transcripts assigned positive G values undergo deviations in expression levels that are opposite from the deviations of the transcripts assigned negative G values. The…
GO:0007156~homophilic cell adhesion via plasma membrane adhesion molecules	26	5.34979	2.43123e-13	PCDHA6, PCDHA7, PCDHA8, CADM3, PCDHA9, PCDHA2, PCDHA3, PCDHA4, CLSTN1, PCDHA5, PCDHGA6, PCDHA1, PCDHGA5, PCDHGC3, PCDHGA3, PCDHAC2, PCDHAC1, PCDHA10, PCDHA11, PCDHA12, PCDHA13, PCDHGA12, PCDHGA10, PCDHGA11, PCDH9, CDH10	428	158	16792	6.45617	2.42409e-10
GO:0007268~chemical synaptic transmission	26	5.34979	2.51221e-09	SNCG, SYT1, SCN1B, SNAP91, SNCB, CACNB1, CACNB3, GABBR2, AMPH, SLC1A2, NPTX1, SYN1, SYN2, SNAP25, DLG2, GABRD, DLGAP1, NRXN2, KIF5A, GRIN1, GRIN2A, NRXN1, DOC2A, GRIA2, UNC13A, HTR2A	428	240	16792	4.25031	1.66978e-06
GO:0007269~neurotransmitter secretion	12	2.46914	4.81986e-08	RAB3A, SYT1, STX1A, SYN1, NRXN2, SYN2, SNPH, STXBP1, NRXN1, VAMP2, SNAP25, UNC13A	428	51	16792	9.23145	2.40267e-05
GO:0014047~glutamate secretion	9	1.85185	3.25616e-07	SLC17A7, RAB3A, SYT1, SLC1A2, STX1A, NTRK2, STXBP1, VAMP2, SNAP25	428	28	16792	12.6108	0.000129847
GO:0034220~ion transmembrane transport	21	4.32099	4.35864e-07	GABRG2, ATP1B1, GABRA2, GABRA1, GABRB3, GABRA4, NCALD, ATP1A3, ATP1A2, FXYD6, ATP2B1, ATP2B2, ATP6V1A, ATP2B3, ATP2B4, GRIA2, CALM3, ATP6V0A1, SCNN1A, CALM2, CALM1	428	210	16792	3.92336	0.000144842
GO:0007411~axon guidance	18	3.7037	6.3683e-07	FLRT2, SCN1B, KIF5A, KIF5C, L1CAM, NRXN1, PTPRO, KRAS, UNC5A, ANK3, LHX2, MEG3, SPTBN2, OPHN1, MAPK8IP3, EFNA5, USP33, FEZ2	428	159	16792	4.44154	0.000181389
GO:0016079~synaptic vesicle exocytosis	8	1.64609	8.02214e-07	RAB3A, CPLX2, CADPS2, PIP5K1C, VAMP2, SNAP25, PCLO, UNC13A	428	22	16792	14.2668	0.000199932
GO:0043547~positive regulation of GTPase activity	36	7.40741	1.19005e-06	FGFR3, FGF9, CAMK2G, FAM13A, AMPH, CAMK2D, CAMK2B, AGAP1, RAP1GAP2, RAPGEF2, SHC3, NEFL, CAMK2A, AGAP3, ARHGDIA, RASA2, ARHGEF4, GNAO1, ABR, ARHGEF7, GRIN1, GRIN2A, PSD3, TRIO, THY1, TBC1D24, RGS4, GSK3B, SPTBN2, OPHN1, CALM3, GNAS, SH3BP1, CALM2, KALRN, CALM1	428	565	16792	2.49984	0.000263627
GO:0007155~cell adhesion	31	6.3786	2.43294e-06	PCDHA6, PCDHA7, ATP1B1, PCDHA8, SCN1B, PCDHA2, OPCML, NUAK1, PCDHA3, PCDHA4, CLSTN1, PCDHA5, L1CAM, PCDHGC3, PCDHA1, PCDHAC2, PCDHAC1, CD47, GP1BB, CNTNAP2, PCDHA10, PCDHA11, ZYX, HAPLN4, PPFIBP1, PRKCE, SIRPA, THY1, EPHA4, PRKD2, NTM	428	459	16792	2.64977	0.000485011
GO:0043524~negative regulation of neuron apoptotic process	15	3.08642	6.82481e-06	MEF2C, GABRB3, SNCB, CPEB4, SNCA, GRIN1, STXBP1, PRKCI, KRAS, SET, HIPK2, NTRK2, NEFL, CACNA1A, OXR1	428	132	16792	4.45837	0.00123639
GO:1903779~regulation of cardiac conduction	10	2.05761	1.07336e-05	ATP2B1, ATP2B2, ATP1B1, ATP2B3, ATP2B4, ATP1A3, NPR1, PRKACA, ATP1A2, FXYD6	428	56	16792	7.00601	0.00178198
GO:0000165~MAPK cascade	21	4.32099	1.30695e-05	MEF2C, FGFR3, FGF9, CAMK2G, GRIN1, GRIN2A, YWHAB, CAMKK2, KRAS, MAPK8IP2, CAMK2D, SPTBN2, CALM3, CAMK2B, SHC3, RAPGEF2, CAMK2A, NEFL, CALM2, RASA2, CALM1	428	262	16792	3.14468	0.00200267
GO:0018105~peptidyl-serine phosphorylation	14	2.88066	1.79387e-05	PDK3, PKN2, PRKCI, PRKCE, UHMK1, PRKD2, TTBK2, GSK3B, HIPK2, CAMK2D, PRKACA, CAMK2A, DCLK1, AKT3	428	125	16792	4.39417	0.00255174
GO:0051966~regulation of synaptic transmission, glutamatergic	7	1.44033	1.82475e-05	MEF2C, SYT1, MAPK8IP2, OPHN1, ATP1A2, UNC13A, KALRN	428	23	16792	11.9407	0.00242279
GO:0035176~social behavior	9	1.85185	2.53207e-05	KRAS, NRXN2, GRIN1, MAPK8IP2, CNTNAP2, VPS13A, NRXN1, SHANK2, KALRN	428	48	16792	7.35631	0.00315066
GO:0001504~neurotransmitter uptake	5	1.02881	2.66137e-05	GLUL, SV2B, SV2A, ATP1A2, SNAP25	428	8	16792	24.521	0.0031168
GO:0046777~protein autophosphorylation	16	3.29218	3.43863e-05	FGFR3, CAMK2G, WNK1, UHMK1, CAMKK2, THY1, NTRK3, IGF1R, EPHA4, PRKD2, GSK3B, NTRK2, CAMK2D, CAMK2B, PRKACA, CAMK2A	428	172	16792	3.64964	0.00380206
GO:0030534~adult behavior	7	1.44033	3.90101e-05	GABRG2, SLC1A2, NRXN2, SPTBN2, CNTNAP2, NRXN1, SHANK2	428	26	16792	10.5629	0.00408571
GO:0035556~intracellular signal transduction	26	5.34979	3.96127e-05	FKBP8, ADCY1, ADCY2, NUAK1, RAPGEF2, DCLK1, AKT3, RASA2, ARHGEF4, SRPK2, ABR, NUDT4, ARHGEF7, PKN2, PRKCI, WNK1, NPR1, PRKCE, YWHAE, SH3BP5, PRKD2, GSK3B, DGKZ, CIT, UNC13A, KALRN	428	403	16792	2.5312	0.00394167
GO:0006468~protein phosphorylation	28	5.76132	4.42907e-05	NUAK1, CAMKK2, SBK1, COL4A3BP, CAMK2D, PRKACA, CAMK2B, CAMK2A, PIK3R1, DCLK1, AKT3, MATK, SRPK2, WNK1, PKN2, PRKCI, NPR1, TRIO, PRKCE, PRKD2, HIPK1, GSK3A, PRKAR1B, GSK3B, HIPK2, CIT, KALRN, CAMK1D	428	456	16792	2.40908	0.00419677
GO:0040011~locomotion	5	1.02881	7.66663e-05	ATP2B2, JPH3, SCN1B, ATP1A2, NEFL	428	10	16792	19.6168	0.00692493
GO:0010881~regulation of cardiac muscle contraction by regulation of the release of sequestered calcium ion	6	1.23457	8.99381e-05	CAMK2D, CALM3, PRKACA, ATP1A2, CALM2, CALM1	428	19	16792	12.3896	0.00776727
GO:0060314~regulation of ryanodine-sensitive calcium-release channel activity	6	1.23457	8.99381e-05	JPH3, CAMK2D, CALM3, PRKACA, CALM2, CALM1	428	19	16792	12.3896	0.00776727
GO:0050885~neuromuscular process controlling balance	8	1.64609	0.000148683	RBFOX1, RBFOX2, ATP2B2, JPH3, ABR, NRXN1, NEFL, CACNA1A	428	46	16792	6.82324	0.012278
GO:0007214~gamma-aminobutyric acid signaling pathway	6	1.23457	0.000191256	GABRG2, GABRA2, GABRA1, GABRA4, GABBR2, CACNA1A	428	22	16792	10.7001	0.0151402
GO:0021762~substantia nigra development	8	1.64609	0.000223485	ZNF148, FGF9, CALM3, NDRG2, BASP1, YWHAE, CALM2, CALM1	428	49	16792	6.40549	0.0169954
GO:0048813~dendrite morphogenesis	7	1.44033	0.000310963	RBFOX2, TMEM106B, MAPK8IP2, ELAVL4, CAMK2A, DCLK1, CACNA1A	428	37	16792	7.42258	0.022707
GO:0008344~adult locomotory behavior	8	1.64609	0.000326014	SNCG, ID2, GRIN1, SNCA, ATP1A3, SEZ6L, ATP1A2, DNM1	428	52	16792	6.03595	0.0229531
GO:0000381~regulation of alternative mRNA splicing, via spliceosome	7	1.44033	0.000361437	RBFOX1, RBFOX2, SRRM4, RBFOX3, CELF4, UHMK1, RBM25	428	38	16792	7.22725	0.0245501
GO:0048791~calcium ion-regulated exocytosis of neurotransmitter	7	1.44033	0.000418099	SYT1, DOC2A, SYT13, SYTL2, RPH3A, CACNA1A, RIMS3	428	39	16792	7.04194	0.0274127
GO:0017157~regulation of exocytosis	6	1.23457	0.000439355	SEPT5, SYT1, CPLX2, STX1A, VAMP2, PCLO	428	26	16792	9.05392	0.0278709
GO:0007190~activation of adenylate cyclase activity	7	1.44033	0.00048146	ADCY1, ADCY2, CAP2, CALM3, GNAS, CALM2, CALM1	428	40	16792	6.86589	0.0295624
GO:1901841~regulation of high voltage-gated calcium channel activity	4	0.823045	0.000529551	NOS1AP, CALM3, CALM2, CALM1	428	7	16792	22.4192	0.0314994
GO:0048488~synaptic vesicle endocytosis	5	1.02881	0.000588532	SYT1, SNCA, OPHN1, PIP5K1C, SH3GL2	428	16	16792	12.2605	0.0339366
GO:0048168~regulation of neuronal synaptic plasticity	5	1.02881	0.000588532	SYP, JPH3, NSMF, CAMK2A, KALRN	428	16	16792	12.2605	0.0339366
GO:0060079~excitatory postsynaptic potential	6	1.23457	0.000629554	SLC17A7, MEF2C, GRIN1, SNCA, MAPK8IP2, GRIN2A	428	28	16792	8.40721	0.0352419
GO:0010107~potassium ion import	6	1.23457	0.000629554	KCNJ4, ATP1B1, KCNJ6, ATP1A3, ATP1A2, KCNJ3	428	28	16792	8.40721	0.0352419
GO:0016081~synaptic vesicle docking	4	0.823045	0.000831314	STX1A, SNPH, SNAP25, UNC13A	428	8	16792	19.6168	0.0450198
GO:0016188~synaptic vesicle maturation	4	0.823045	0.000831314	SYP, RAB3A, STXBP1, UNC13A	428	8	16792	19.6168	0.0450198
GO:1901844~regulation of cell communication by electrical coupling involved in cardiac conduction	4	0.823045	0.000831314	CAMK2D, CALM3, CALM2, CALM1	428	8	16792	19.6168	0.0450198
GO:0051412~response to corticosterone	5	1.02881	0.000950426	NTRK3, CALM3, NEFL, CALM2, CALM1	428	18	16792	10.8982	0.0499537
GO:0048169~regulation of long-term neuronal synaptic plasticity	5	1.02881	0.000950426	SYP, KRAS, GRIN1, SNCA, CAMK2B	428	18	16792	10.8982	0.0499537
GO:0051965~positive regulation of synapse assembly	8	1.64609	0.000964073	NTRK3, FLRT2, CBLN2, NTRK2, CLSTN1, EFNA5, CUX2, NRXN1	428	62	16792	5.06241	0.0493534

## Sheet: Process 3 G3<-0.01
Transcripts participating in unbalanced process 3 (only those with G3<-0.01*; see Supp. Table 1) were categorized according to GO:
No enriched biological categories were assigned

## Sheet: Process 4 G4>0.01
Transcripts participating in unbalanced process 4 (only those with G4>0.01*; see Supp. Table 1) were categorized according to GO:
Term	Count	%	PValue	Genes	List Total	Pop Hits	Pop Total	Fold Enrichment	Benjamini
GO:0007268~synaptic transmission	39	8.14196	1.19133e-16	SEPT5, DRD1, GABRB3, ADORA2A, SYT5, DRD2, CACNB2, TAC1, CACNB4, KCNIP2, SLC1A4, GAD2, APOE, SYN2, PPP3CA, CD24, KCNQ2, GAD1, GABRG2, EGR3, GLRB, NOS1, SCN2B, CPNE6, GABRA5, PDYN, CDK5, PCLO, VDAC1, MAPK1, CAMK4, NPY, GRIA1, CHRM1, AKAP5, CACNA1E, CORT, SST, HTR2C	344	298	13528	5.14664	2.56573e-13		Note: The complete lists showing the transcripts affected by each of the unbalanced processes are shown in Supp. Table 1. Note that the positive and negative G values show correlations and anti-correlations between transcripts. All transcripts assigned positive G values undergo deviations in expression levels that are opposite from the deviations of the transcripts assigned negative G values. The…
GO:0019226~transmission of nerve impulse	41	8.5595	1.03362e-15	SEPT5, DRD1, GABRB3, ADORA2A, SYT5, DRD2, HEXB, CACNB2, TAC1, CACNB4, KCNIP2, FKBP1B, SLC1A4, GAD2, APOE, SYN2, PPP3CA, CD24, KCNQ2, GAD1, GABRG2, EGR3, GLRB, NOS1, SCN2B, CPNE6, GABRA5, PDYN, CDK5, PCLO, VDAC1, MAPK1, CAMK4, NPY, GRIA1, CHRM1, AKAP5, CACNA1E, CORT, SST, HTR2C	344	350	13528	4.60671	1.15463e-12
GO:0007267~cell-cell signaling	48	10.0209	4.34753e-12	SEPT5, DRD1, YWHAZ, GABRB3, ADORA2A, SYT5, FGF14, DRD2, MME, CACNB2, TAC1, FGF13, CACNB4, KCNIP2, FKBP1B, EPHB1, SLC1A4, GAD2, APOE, SYN2, PPP3CA, CD24, KCNQ2, GAD1, GABRG2, EGR3, GLRB, NOS1, SCN2B, EFNB3, CPNE6, GABRA5, SIX3, PCDH8, PDYN, CDK5, PCLO, VDAC1, MAPK1, CAMK4, NPY, GRIA1, CHRM1, AKAP5, CACNA1E, CORT, SST, HTR2C	344	600	13528	3.14605	3.34904e-09
GO:0010959~regulation of metal ion transport	16	3.34029	1.51724e-09	JPH4, DRD1, JPH3, NOS1, ADORA2A, DRD2, WFS1, FKBP1A, CACNB4, FKBP1B, THY1, MGEA5, RYR2, NEDD4L, JPH1, CALM1	344	81	13528	7.76802	8.76584e-07
GO:0051924~regulation of calcium ion transport	15	3.13152	1.52693e-09	JPH4, DRD1, JPH3, NOS1, ADORA2A, DRD2, WFS1, FKBP1A, CACNB4, FKBP1B, THY1, MGEA5, RYR2, JPH1, CALM1	344	69	13528	8.54904	7.05745e-07
GO:0050877~neurological system process	64	13.3612	2.34104e-08	SEPT5, HRAS, GABRB3, SYT5, WFS1, UCHL1, HEXB, KCNIP2, CALB1, SLC1A4, APOE, MKKS, KCNQ2, DNAJC19, COCH, GABRG2, EGR3, OPA1, SCN2B, SIX3, PRKCG, PDYN, CDK5, PCLO, MAPK1, GNAL, EYA1, PITPNM3, CAMK4, CHRM1, AKAP5, RBP4, DRD1, NDN, ADORA2A, DRD2, ABI2, TAC1, CACNB2, CACNB4, FKBP1B, DTNBP1, APLP2, GAD2, SYN2, B3GNT1, PPP3CA, B3GNT2, CD24, GAD1, GLRB, NOS1, CPNE6, GABRA5, EFEMP1, VDAC1, PENK, NPY, GRIA1…	344	1210	13528	2.08003	9.01685e-06
GO:0043269~regulation of ion transport	16	3.34029	2.65351e-08	JPH4, DRD1, JPH3, NOS1, ADORA2A, DRD2, WFS1, FKBP1A, CACNB4, FKBP1B, THY1, MGEA5, RYR2, NEDD4L, JPH1, CALM1	344	99	13528	6.35565	8.76033e-06
GO:0007270~nerve-nerve synaptic transmission	10	2.08768	4.80584e-08	SLC1A4, DRD1, GLRB, CAMK4, GABRB3, ADORA2A, DRD2, CACNB4, CDK5, VDAC1	344	31	13528	12.6857	1.38828e-05
GO:0032412~regulation of ion transmembrane transporter activity	9	1.87891	8.1234e-08	JPH4, JPH3, ADORA2A, DRD2, FKBP1A, CACNB4, JPH1, FKBP1B, CALM1	344	24	13528	14.7471	2.08589e-05
GO:0032409~regulation of transporter activity	10	2.08768	8.79101e-08	JPH4, JPH3, ADORA2A, DRD2, NDFIP1, FKBP1A, CACNB4, JPH1, FKBP1B, CALM1	344	33	13528	11.9168	2.03158e-05
GO:0006816~calcium ion transport	18	3.75783	1.12861e-07	JPH4, JPH3, CACHD1, DRD2, CACNB2, FKBP1A, CACNB4, CACNA2D3, FKBP1B, ITPR1, PRKCB, ATP2B1, BSPRY, NPY, RYR2, CACNA1E, PPP3CA, JPH1	344	142	13528	4.98493	2.37109e-05
GO:0034765~regulation of ion transmembrane transport	9	1.87891	1.1684e-07	JPH4, JPH3, ADORA2A, DRD2, FKBP1A, CACNB4, JPH1, FKBP1B, CALM1	344	25	13528	14.1572	2.25012e-05
GO:0022898~regulation of transmembrane transporter activity	9	1.87891	1.65066e-07	JPH4, JPH3, ADORA2A, DRD2, FKBP1A, CACNB4, JPH1, FKBP1B, CALM1	344	26	13528	13.6127	2.93432e-05
GO:0034762~regulation of transmembrane transport	9	1.87891	2.29422e-07	JPH4, JPH3, ADORA2A, DRD2, FKBP1A, CACNB4, JPH1, FKBP1B, CALM1	344	27	13528	13.1085	3.78703e-05
GO:0048878~chemical homeostasis	35	7.30689	2.84887e-07	JPH4, RBP4, SLC9A7, DRD1, JPH3, ADORA2A, WFS1, DRD2, HEXB, GPR6, TAC1, FKBP1A, CACNB4, ABCA1, FKBP1B, APLP2, EDNRB, GOT1, APOE, PPP3CA, CD24, NEDD4L, JPH1, LPL, GLRB, NDFIP1, ATP6V1H, CDK5, ABCG1, ITPR1, PRKCB, MGEA5, RYR2, CACNA1E, PRNP	344	512	13528	2.68827	4.38907e-05
GO:0007610~behavior	33	6.88935	3.58133e-07	HRAS, DRD1, ADORA2A, DRD2, WFS1, HEXB, UCHL1, ABI2, TAC1, CACNB4, CALB1, APLP2, EDNRB, PPP1R1B, CNR1, KAL1, MKKS, ROBO2, GNG7, SCG2, GABRG2, GLRB, EFNB3, GABRA5, PRKCG, CDK5, VDAC1, MAPK1, NPY, PENK, GRIA1, HTR2C, RASD2	344	469	13528	2.76705	5.17266e-05
GO:0030003~cellular cation homeostasis	23	4.80167	5.32312e-07	JPH4, DRD1, JPH3, WFS1, DRD2, HEXB, NDFIP1, GPR6, TAC1, ATP6V1H, FKBP1A, CACNB4, FKBP1B, ITPR1, APLP2, PRKCB, EDNRB, APOE, RYR2, NEDD4L, CD24, PRNP, JPH1	344	254	13528	3.56098	7.23605e-05
GO:0060314~regulation of ryanodine-sensitive calcium-release channel activity	6	1.25261	5.35409e-07	JPH4, JPH3, FKBP1A, JPH1, FKBP1B, CALM1	344	8	13528	29.4942	6.87382e-05
GO:0006811~ion transport	44	9.1858	8.10127e-07	JPH4, SLC9A7, JPH3, GABRB3, SCN3A, CACHD1, KCNAB1, DRD2, SCN3B, CACNB2, FKBP1A, CACNB4, ATP6V1B2, KCNIP2, FKBP1B, ATP2B1, ANO3, PPP3CA, NEDD4L, KCNQ2, SLC4A4, SLC4A3, JPH1, GABRG2, GLRB, SVOP, SCN2B, GABRA5, SCN2A, KCTD1, ATP6V1H, CACNA2D3, KCTD4, ITPR1, PRKCB, VDAC1, BSPRY, NPY, GRIA1, ATP6V1E1, SCN4B, KCNF1, RYR2, CACNA1E	344	768	13528	2.25303	9.85323e-05
GO:0030001~metal ion transport	32	6.68058	9.03362e-07	JPH4, SLC9A7, JPH3, CACHD1, SCN3A, KCNAB1, SCN3B, DRD2, CACNB2, FKBP1A, CACNB4, KCNIP2, FKBP1B, ATP2B1, PPP3CA, NEDD4L, KCNQ2, SLC4A4, JPH1, SCN2B, SCN2A, KCTD1, CACNA2D3, KCTD4, ITPR1, PRKCB, BSPRY, NPY, SCN4B, KCNF1, RYR2, CACNA1E	344	465	13528	2.70628	0.000104378
GO:0006873~cellular ion homeostasis	28	5.84551	1.03782e-06	JPH4, JPH3, DRD1, ADORA2A, WFS1, DRD2, HEXB, GPR6, TAC1, FKBP1A, CACNB4, FKBP1B, APLP2, EDNRB, APOE, PPP3CA, CD24, NEDD4L, JPH1, GLRB, NDFIP1, ATP6V1H, CDK5, ITPR1, PRKCB, MGEA5, RYR2, PRNP	344	374	13528	2.94416	0.000114204
GO:0055080~cation homeostasis	24	5.01044	1.07909e-06	JPH4, SLC9A7, DRD1, JPH3, WFS1, DRD2, HEXB, NDFIP1, GPR6, TAC1, ATP6V1H, FKBP1A, CACNB4, FKBP1B, ITPR1, APLP2, PRKCB, EDNRB, APOE, RYR2, NEDD4L, CD24, PRNP, JPH1	344	286	13528	3.30005	0.000113347
GO:0030005~cellular di-, tri-valent inorganic cation homeostasis	21	4.38413	1.35382e-06	JPH4, DRD1, JPH3, WFS1, DRD2, HEXB, NDFIP1, GPR6, TAC1, FKBP1A, CACNB4, FKBP1B, ITPR1, APLP2, PRKCB, EDNRB, APOE, RYR2, CD24, PRNP, JPH1	344	227	13528	3.63805	0.00013602
GO:0055082~cellular chemical homeostasis	28	5.84551	1.41071e-06	JPH4, JPH3, DRD1, ADORA2A, WFS1, DRD2, HEXB, GPR6, TAC1, FKBP1A, CACNB4, FKBP1B, APLP2, EDNRB, APOE, PPP3CA, CD24, NEDD4L, JPH1, GLRB, NDFIP1, ATP6V1H, CDK5, ITPR1, PRKCB, MGEA5, RYR2, PRNP	344	380	13528	2.89767	0.00013583
GO:0006812~cation transport	35	7.30689	1.64932e-06	JPH4, SLC9A7, JPH3, CACHD1, SCN3A, KCNAB1, SCN3B, DRD2, CACNB2, FKBP1A, CACNB4, ATP6V1B2, KCNIP2, FKBP1B, ATP2B1, PPP3CA, NEDD4L, KCNQ2, SLC4A4, JPH1, SCN2B, SCN2A, KCTD1, ATP6V1H, CACNA2D3, KCTD4, ITPR1, PRKCB, BSPRY, NPY, ATP6V1E1, SCN4B, KCNF1, RYR2, CACNA1E	344	553	13528	2.48896	0.000152452
GO:0050801~ion homeostasis	29	6.05428	1.87113e-06	JPH4, SLC9A7, JPH3, DRD1, ADORA2A, WFS1, DRD2, HEXB, GPR6, TAC1, FKBP1A, CACNB4, FKBP1B, APLP2, EDNRB, APOE, PPP3CA, CD24, NEDD4L, JPH1, GLRB, NDFIP1, ATP6V1H, CDK5, ITPR1, PRKCB, MGEA5, RYR2, PRNP	344	409	13528	2.78837	0.000166301
GO:0015674~di-, tri-valent inorganic cation transport	18	3.75783	2.42251e-06	JPH4, JPH3, CACHD1, DRD2, CACNB2, FKBP1A, CACNB4, CACNA2D3, FKBP1B, ITPR1, PRKCB, ATP2B1, BSPRY, NPY, RYR2, CACNA1E, PPP3CA, JPH1	344	176	13528	4.02193	0.000207327
GO:0006875~cellular metal ion homeostasis	19	3.9666	2.54219e-06	JPH4, DRD1, JPH3, WFS1, DRD2, HEXB, GPR6, TAC1, FKBP1A, CACNB4, FKBP1B, ITPR1, PRKCB, EDNRB, APOE, RYR2, NEDD4L, CD24, JPH1	344	196	13528	3.81217	0.0002098
GO:0019725~cellular homeostasis	31	6.47182	2.78919e-06	GLRX3, JPH4, JPH3, DRD1, ADORA2A, WFS1, DRD2, HEXB, GPR6, TAC1, PRDX5, FKBP1A, CACNB4, FKBP1B, APLP2, EDNRB, APOE, PPP3CA, CD24, NEDD4L, JPH1, GLRB, NDFIP1, ATP6V1H, CDK5, ITPR1, PRKCB, MGEA5, RYR2, PRNP, ADD1	344	466	13528	2.61608	0.000222245
GO:0055066~di-, tri-valent inorganic cation homeostasis	21	4.38413	2.99991e-06	JPH4, DRD1, JPH3, WFS1, DRD2, HEXB, NDFIP1, GPR6, TAC1, FKBP1A, CACNB4, FKBP1B, ITPR1, APLP2, PRKCB, EDNRB, APOE, RYR2, CD24, PRNP, JPH1	344	239	13528	3.45539	0.000231067
GO:0007212~dopamine receptor signaling pathway	7	1.46138	3.64867e-06	GNAL, DRD1, CALY, DRD2, HMP19, KLF16, RGS9	344	18	13528	15.2933	0.000271966
GO:0006874~cellular calcium ion homeostasis	18	3.75783	4.13091e-06	JPH4, DRD1, JPH3, WFS1, DRD2, HEXB, GPR6, TAC1, FKBP1A, CACNB4, FKBP1B, ITPR1, PRKCB, EDNRB, APOE, RYR2, CD24, JPH1	344	183	13528	3.86809	0.000298285
GO:0055065~metal ion homeostasis	19	3.9666	4.80677e-06	JPH4, DRD1, JPH3, WFS1, DRD2, HEXB, GPR6, TAC1, FKBP1A, CACNB4, FKBP1B, ITPR1, PRKCB, EDNRB, APOE, RYR2, NEDD4L, CD24, JPH1	344	205	13528	3.64481	0.000336564
GO:0060402~calcium ion transport into cytosol	7	1.46138	5.2193e-06	JPH4, JPH3, DRD2, RYR2, FKBP1A, JPH1, FKBP1B	344	19	13528	14.4884	0.000354697
GO:0055074~calcium ion homeostasis	18	3.75783	5.96186e-06	JPH4, DRD1, JPH3, WFS1, DRD2, HEXB, GPR6, TAC1, FKBP1A, CACNB4, FKBP1B, ITPR1, PRKCB, EDNRB, APOE, RYR2, CD24, JPH1	344	188	13528	3.76522	0.000393577
GO:0060401~cytosolic calcium ion transport	7	1.46138	7.2977e-06	JPH4, JPH3, DRD2, RYR2, FKBP1A, JPH1, FKBP1B	344	20	13528	13.764	0.000468364
GO:0051050~positive regulation of transport	19	3.9666	1.54208e-05	SEPT5, RBP4, DRD1, CALY, ADORA2A, DRD2, C3, WFS1, NNAT, ARPP19, TAC1, CDK5, THY1, APOE, SCIN, MGEA5, NEDD4L, HTR2C, CALM1	344	223	13528	3.35061	0.000962719
GO:0042592~homeostatic process	39	8.14196	3.69453e-05	GLRX3, JPH4, RBP4, SLC9A7, DRD1, JPH3, ADORA2A, WFS1, DRD2, HEXB, GPR6, TAC1, PRDX5, FKBP1A, CACNB4, ABCA1, FKBP1B, APLP2, EDNRB, GOT1, APOE, PPP3CA, CD24, NEDD4L, JPH1, LPL, GLRB, NCDN, NDFIP1, ATP6V1H, CDK5, ABCG1, ITPR1, PRKCB, MGEA5, RYR2, CACNA1E, PRNP, ADD1	344	751	13528	2.04221	0.00224438
GO:0044092~negative regulation of molecular function	23	4.80167	4.36877e-05	DRD1, THRA, ADORA2A, DRD2, ADCY5, PRKAG2, NDFIP1, APOC1, FKBP1A, FKBP1B, PKIA, THY1, LRPAP1, GNAL, PSMA1, EDNRB, APOE, PSMC3, RGS4, PSMB2, CORT, PSMD8, CALM1	344	334	13528	2.70805	0.00258548
GO:0033555~multicellular organismal response to stress	8	1.67015	4.84452e-05	EDNRB, DRD1, NOS1, PENK, GABRA5, TAC1, GNG7, VDAC1	344	39	13528	8.06679	0.00279507
GO:0043279~response to alkaloid	9	1.87891	5.92001e-05	GNAL, DRD1, ADORA2A, DRD2, RYR2, TAC1, FKBP1A, HTR2C, CDK5	344	54	13528	6.55426	0.0033314
GO:0016192~vesicle-mediated transport	32	6.68058	6.51874e-05	SEPT5, YWHAZ, HRAS, CALY, AP1G2, ADORA2A, COPZ1, ABCA1, DTNBP1, APOE, TRAPPC6B, NECAP1, RAB6A, CD24, ELMOD1, GLRB, GOLT1A, ICAM5, CPNE6, ATP6V1H, CDK5, PCLO, LRPAP1, AKTIP, ARF1, ULK1, FNBP1L, GRIA1, SCIN, TRAPPC5, SYTL5, COG1	344	576	13528	2.18475	0.00358055
GO:0010522~regulation of calcium ion transport into cytosol	7	1.46138	7.37462e-05	DRD1, NOS1, MGEA5, RYR2, FKBP1B, CALM1, THY1	344	29	13528	9.49238	0.00395573
GO:0007204~elevation of cytosolic calcium ion concentration	12	2.50522	0.000107688	JPH4, EDNRB, JPH3, DRD1, DRD2, GPR6, RYR2, TAC1, FKBP1A, CD24, JPH1, FKBP1B	344	110	13528	4.29006	0.00564041
GO:0030182~neuron differentiation	26	5.42797	0.000136374	DRD1, LPPR4, TUBB2B, NDN, ADORA2A, TUBB2A, DRD2, NNAT, ONECUT2, UCHL1, ABI2, KCNIP2, EPHB1, NRCAM, BCL11B, KAL1, B3GNT1, ROBO2, CD24, B3GNT2, EFNB3, CDK5, THY1, PSD, ULK1, MAP2, ID4	344	438	13528	2.3344	0.00697957
GO:0007628~adult walking behavior	6	1.25261	0.000187812	DRD1, GLRB, EFNB3, DRD2, UCHL1, CACNB4	344	22	13528	10.7252	0.00939199
GO:0051480~cytosolic calcium ion homeostasis	12	2.50522	0.000201903	JPH4, EDNRB, JPH3, DRD1, DRD2, GPR6, RYR2, TAC1, FKBP1A, CD24, JPH1, FKBP1B	344	118	13528	3.99921	0.0098795
GO:0043086~negative regulation of catalytic activity	19	3.9666	0.000254757	DRD1, ADORA2A, DRD2, ADCY5, PRKAG2, APOC1, FKBP1A, FKBP1B, PKIA, THY1, PSMA1, EDNRB, GNAL, APOE, PSMC3, RGS4, PSMB2, CORT, PSMD8	344	277	13528	2.69742	0.0121921
GO:0008277~regulation of G-protein coupled receptor protein signaling pathway	8	1.67015	0.000280985	RGS20, RGS2, DRD2, RGS4, RGS9, RIC8B, RGS14, GNG7	344	51	13528	6.16872	0.0131666
GO:0030534~adult behavior	10	2.08768	0.000321933	GABRG2, DRD1, GLRB, NPY, EFNB3, DRD2, UCHL1, CACNB4, HTR2C, CDK5	344	86	13528	4.57274	0.0147719
GO:0044057~regulation of system process	20	4.17537	0.000349091	HRAS, DRD1, THRA, NOS1, NCDN, ADORA2A, DRD2, BMPR2, TAC1, KCNIP2, CDK5, FKBP1B, CALB1, EDNRB, APOE, MGEA5, RYR2, GUCY1A3, PPP3CA, HTR2C	344	309	13528	2.54535	0.0156969
GO:0048666~neuron development	21	4.38413	0.00041786	DRD1, LPPR4, EFNB3, NDN, ADORA2A, DRD2, ONECUT2, UCHL1, ABI2, KCNIP2, CDK5, EPHB1, THY1, NRCAM, ULK1, KAL1, BCL11B, MAP2, B3GNT1, ROBO2, CD24, B3GNT2	344	339	13528	2.4361	0.0184031
GO:0030810~positive regulation of nucleotide biosynthetic process	5	1.04384	0.000444186	DRD1, ADORA2A, APOE, GUCY1A3, ABCA1	344	15	13528	13.1085	0.019186
GO:0030804~positive regulation of cyclic nucleotide biosynthetic process	5	1.04384	0.000444186	DRD1, ADORA2A, APOE, GUCY1A3, ABCA1	344	15	13528	13.1085	0.019186
GO:0030801~positive regulation of cyclic nucleotide metabolic process	5	1.04384	0.000444186	DRD1, ADORA2A, APOE, GUCY1A3, ABCA1	344	15	13528	13.1085	0.019186
GO:0001662~behavioral fear response	5	1.04384	0.000444186	DRD1, PENK, GABRA5, GNG7, VDAC1	344	15	13528	13.1085	0.019186
GO:0045981~positive regulation of nucleotide metabolic process	5	1.04384	0.000444186	DRD1, ADORA2A, APOE, GUCY1A3, ABCA1	344	15	13528	13.1085	0.019186
GO:0002209~behavioral defense response	5	1.04384	0.000444186	DRD1, PENK, GABRA5, GNG7, VDAC1	344	15	13528	13.1085	0.019186
GO:0051279~regulation of release of sequestered calcium ion into cytosol	5	1.04384	0.000444186	DRD1, RYR2, FKBP1B, CALM1, THY1	344	15	13528	13.1085	0.019186
GO:0007611~learning or memory	11	2.29645	0.00051362	HRAS, DRD1, DRD2, GRIA1, GABRA5, ABI2, TAC1, PRKCG, CALB1, CDK5, VDAC1	344	111	13528	3.89713	0.0217467
GO:0032844~regulation of homeostatic process	11	2.29645	0.00063439	DRD1, NOS1, DRD2, MGEA5, RYR2, TAC1, FKBP1A, CD24, FKBP1B, CALM1, THY1	344	114	13528	3.79457	0.026312
GO:0007626~locomotory behavior	18	3.75783	0.000637944	HRAS, GLRB, DRD1, EFNB3, ADORA2A, DRD2, UCHL1, HEXB, CACNB4, CALB1, APLP2, EDNRB, MAPK1, KAL1, ROBO2, RASD2, GNG7, SCG2	344	274	13528	2.58343	0.0259912
GO:0046907~intracellular transport	32	6.68058	0.00065456	YWHAZ, DRD1, AP1G2, UCHL1, COPZ1, ABCA1, DTNBP1, FKBP1B, MYL6B, APOE, TOMM5, MKKS, PPP3CA, CD24, DNAJC19, DYNC1I1, MCM3AP, OPA1, SIX3, CDK5, ABCG1, MAPK1, CAMK4, AKTIP, ARF1, TOMM70A, MGEA5, AKAP5, RYR2, SYTL5, CAMK1, COG1	344	657	13528	1.9154	0.0261978
GO:0008306~associative learning	5	1.04384	0.000744012	DRD1, DRD2, GABRA5, TAC1, CDK5	344	17	13528	11.5663	0.0292206
GO:0031000~response to caffeine	4	0.835073	0.000823055	GNAL, ADORA2A, RYR2, FKBP1A	344	8	13528	19.6628	0.0317374
GO:0031175~neuron projection development	17	3.54906	0.000845726	LPPR4, EFNB3, NDN, ADORA2A, DRD2, UCHL1, ABI2, CDK5, EPHB1, NRCAM, ULK1, BCL11B, KAL1, MAP2, B3GNT1, ROBO2, CD24, B3GNT2	344	256	13528	2.61146	0.0320631
GO:0032990~cell part morphogenesis	17	3.54906	0.000845726	LPPR4, OPA1, EFNB3, NDN, ADORA2A, DRD2, ONECUT2, UCHL1, CDK5, EPHB1, NRCAM, ULK1, BCL11B, KAL1, B3GNT1, MKKS, ROBO2, B3GNT2	344	256	13528	2.61146	0.0320631
GO:0007242~intracellular signaling cascade	51	10.6472	0.000873392	HRAS, THRA, ADCY5, PRKAG2, FGF13, EDNRB, ARHGAP6, DIRAS3, APOE, GUCY1A3, RAB6A, AGAP2, GNG7, BCR, PIK3C2A, G3BP2, PRKCH, PRKCG, CDK5, PCLO, PRKCB, MCTP1, DAPK1, GNAL, MAPK1, CHRM1, GUCY1B3, ARL8B, PMEPA1, RASD2, CAPS, DRD1, RAB3C, ADORA2A, DRD2, ABCA1, DGKB, DGKE, CNR1, SCG2, GPR155, DGKH, RERG, ARF1, NPY, ULK1, RGS4, RGS9, DDX54, CORT, HTR2C	344	1256	13528	1.59682	0.0325612
GO:0051241~negative regulation of multicellular organismal process	13	2.71399	0.000969571	RBP4, DRD1, DRD2, NDFIP1, APOC1, BMPR2, TAC1, FKBP1B, LRPAP1, APOE, MGEA5, GUCY1A3, CD24	344	164	13528	3.11727	0.0355116
GO:0048167~regulation of synaptic plasticity	8	1.67015	0.00113825	HRAS, DRD1, NCDN, ADORA2A, DRD2, APOE, CALB1, CDK5	344	64	13528	4.9157	0.040917
GO:0030030~cell projection organization	21	4.38413	0.00114821	KLF5, LPPR4, EFNB3, NDN, ADORA2A, DRD2, ONECUT2, UCHL1, ABI2, ACTN2, CDK5, EPHB1, NRCAM, ULK1, BCL11B, KAL1, MAP2, B3GNT1, MKKS, ROBO2, CD24, B3GNT2	344	368	13528	2.24412	0.0406364
GO:0042596~fear response	5	1.04384	0.00116409	DRD1, PENK, GABRA5, GNG7, VDAC1	344	19	13528	10.3488	0.0405663
GO:0001975~response to amphetamine	5	1.04384	0.00116409	GNAL, DRD1, ADORA2A, DRD2, PPP3CA	344	19	13528	10.3488	0.0405663
GO:0040012~regulation of locomotion	14	2.92276	0.00124204	DRD1, DRD2, ADORA2A, ONECUT2, TAC1, CDK5, THY1, MAPK1, APOE, CHRM1, MKKS, SST, HTR2C, SCG2	344	192	13528	2.86749	0.0425838
GO:0051247~positive regulation of protein metabolic process	16	3.34029	0.00137761	AURKAIP1, WFS1, PRKAG2, NDFIP1, BMPR2, FKBP1A, UBE2N, PSMA1, EDNRB, MAPK1, PSMC3, APOE, PSMB2, MGEA5, CD24, PSMD8	344	243	13528	2.58934	0.0464371
GO:0048858~cell projection morphogenesis	16	3.34029	0.00149571	LPPR4, EFNB3, NDN, ADORA2A, DRD2, ONECUT2, UCHL1, CDK5, EPHB1, NRCAM, ULK1, BCL11B, KAL1, B3GNT1, MKKS, ROBO2, B3GNT2	344	245	13528	2.5682	0.0495978

## Sheet: Process 4 G4<-0.01
Transcripts participating in unbalanced process 4 (only those with G4<-0.01*; see Supp. Table 1) were categorized according to GO:
Category	Term	Count	%	PValue	Genes	List Total	Pop Hits	Pop Total	Fold Enrichment	Bonferroni	Benjamini	FDR
GOTERM_BP_FAT	GO:0048666~neuron development	48	4.89297	6.20293e-09	RAB3A, CCK, ERBB3, PAX6, RORB, MYCBP2, ATP2B2, IGF1R, EFHD1, PTK2, MACF1, CD44, UNC5B, ANK3, UNC5A, TNR, LHX2, RAC1, CNTNAP2, SEMA3B, SS18L1, EGFR, MYO6, CREB1, MAP1B, KIF5C, NFASC, LIFR, NRXN1, GAS7, CDKN1C, EPHA4, SEMA6A, ASCL1, RND1, S100B, PSEN1, NTRK2, CNTN2, MAPK8IP3, VCAN, EFNA5, APBB2, FEZ2, CACNA1A, NTM, GAP43, KALRN	755	339	13528	2.53705	1.69525e-05	1.69525e-05	1.10535e-05		Note: The complete lists showing the transcripts affected by each of the unbalanced processes are shown in Supp. Table 1. Note that the positive and negative G values show correlations and anti-correlations between transcripts. All transcripts assigned positive G values undergo deviations in expression levels that are opposite from the deviations of the transcripts assigned negative G values. The…
GOTERM_BP_FAT	GO:0048812~neuron projection morphogenesis	35	3.56779	2.51377e-08	RAB3A, CCK, ERBB3, PAX6, MYCBP2, IGF1R, PTK2, MACF1, UNC5B, ANK3, UNC5A, TNR, LHX2, RAC1, SEMA3B, EGFR, CREB1, MAP1B, KIF5C, LIFR, NFASC, NRXN1, GAS7, SEMA6A, EPHA4, S100B, CNTN2, MAPK8IP3, EFNA5, VCAN, APBB2, FEZ2, GAP43, CACNA1A, KALRN	755	213	13528	2.94425	6.8699e-05	3.43501e-05	4.47949e-05
GOTERM_BP_FAT	GO:0031175~neuron projection development	39	3.97554	2.87817e-08	RAB3A, CCK, ERBB3, PAX6, MYCBP2, IGF1R, EFHD1, PTK2, MACF1, CD44, UNC5B, ANK3, UNC5A, TNR, LHX2, RAC1, SEMA3B, SS18L1, EGFR, MYO6, CREB1, MAP1B, KIF5C, NFASC, LIFR, NRXN1, GAS7, SEMA6A, EPHA4, S100B, CNTN2, MAPK8IP3, EFNA5, VCAN, APBB2, FEZ2, GAP43, CACNA1A, KALRN	755	256	13528	2.72968	7.86573e-05	2.62198e-05	5.12884e-05
GOTERM_BP_FAT	GO:0030182~neuron differentiation	54	5.50459	7.45555e-08	AGTPBP1, PAX6, RORB, ATP2B2, EFHD1, CD44, UNC5B, ANK3, UNC5A, CNTNAP2, SEMA3B, OLIG2, SS18L1, EGFR, MYO6, KIF5C, LIFR, NRXN1, ASCL1, RND1, PSEN1, CNTN2, VCAN, EFNA5, CUX1, GAP43, KALRN, RAB3A, CCK, ERBB3, SOX2, MYCBP2, IGF1R, PTK2, MACF1, TNR, LHX2, RAC1, NKX2-2, CREB1, MAP1B, NFASC, GAS7, STAT3, CDKN1C, EPHA4, SEMA6A, S100B, NTRK2, MAPK8IP3, APBB2, CACNA1A, FEZ2, NTM	755	438	13528	2.20905	0.000203739	5.09388e-05	0.000132856
GOTERM_BP_FAT	GO:0048667~cell morphogenesis involved in neuron differentiation	33	3.36391	1.74562e-07	RAB3A, CCK, ERBB3, PAX6, MYCBP2, ATP2B2, IGF1R, PTK2, MACF1, UNC5B, ANK3, UNC5A, LHX2, TNR, RAC1, SEMA3B, CREB1, MAP1B, KIF5C, NFASC, NRXN1, SEMA6A, EPHA4, S100B, CNTN2, MAPK8IP3, EFNA5, VCAN, APBB2, FEZ2, GAP43, CACNA1A, KALRN	755	209	13528	2.82914	0.000476963	9.54108e-05	0.000311065
GOTERM_BP_FAT	GO:0030030~cell projection organization	47	4.79103	2.14814e-07	RAB3A, MTSS1, CCK, PDGFA, ERBB3, WASF2, PAX6, RDX, LPAR1, MYCBP2, ATP2B2, IGF1R, EFHD1, PTK2, MACF1, CD44, UNC5B, ANK3, UNC5A, TNR, LHX2, RAC1, SEMA3B, SS18L1, FGD4, EGFR, MYO6, CREB1, MAP1B, KIF5C, NFASC, LIFR, NRXN1, GAS7, EPHA4, SEMA6A, P2RX7, S100B, CNTN2, MAPK8IP3, VCAN, EFNA5, APBB2, FEZ2, CACNA1A, GAP43, KALRN	755	368	13528	2.28842	0.000586915	9.7843e-05	0.000382793
GOTERM_BP_FAT	GO:0007409~axonogenesis	31	3.16004	3.02396e-07	RAB3A, CCK, ERBB3, PAX6, MYCBP2, IGF1R, PTK2, MACF1, UNC5B, ANK3, UNC5A, LHX2, TNR, RAC1, SEMA3B, CREB1, MAP1B, KIF5C, NFASC, NRXN1, SEMA6A, EPHA4, S100B, CNTN2, MAPK8IP3, EFNA5, VCAN, APBB2, FEZ2, GAP43, KALRN	755	193	13528	2.878	0.000826106	0.000118057	0.000538862
GOTERM_BP_FAT	GO:0032989~cellular component morphogenesis	49	4.9949	3.19852e-07	RAB3A, CCK, ERBB3, PAX6, SOX9, ITGB1, MYCBP2, ATP2B2, IGF1R, CD9, PTK2, NDE1, MACF1, UNC5B, ANK3, UNC5A, TNR, LHX2, RAC1, CLASP1, SEMA3B, CLASP2, DLG1, EGFR, LIPA, CREB1, MAP1B, KIF5C, NFASC, LIFR, NRXN1, CAPN3, GAS7, EPHA4, SEMA6A, P2RX7, ERBB2IP, S100B, CNTN2, MAPK8IP3, VCAN, EFNA5, MAP7, APBB2, PMP22, FEZ2, CACNA1A, GAP43, KALRN	755	397	13528	2.21153	0.000873773	0.000109263	0.000569967
GOTERM_BP_FAT	GO:0006468~protein amino acid phosphorylation	70	7.13558	4.10685e-07	CDK19, CDK18, TBK1, NUAK1, TGFB3, LPAR1, CLK1, MAP3K7, PDPK1, PAK2, MAP3K9, AAK1, GAB1, PIK3CA, BRD4, TLK2, INSR, EGFR, SRPK2, TWF1, SGK1, WNK1, PKN2, PIM3, PRKCE, SPAG9, MAST4, MAP4K4, DDR1, MAP4K5, HIPK1, PSEN1, HIPK2, CDK2AP1, KSR1, MAP3K13, NEK7, KALRN, FGFR2, NEK3, ERBB3, PTPLAD1, CAMK2G, MKNK2, ADRBK2, MKNK1, PXK, UHMK1, TRIB2, IGF1R, PTK2, SBK1, TTBK2, MAP3K2, TNKS, YES1, STK38L, FGD4, FLT…	755	667	13528	1.88044	0.00112177	0.000124704	0.00073183
GOTERM_BP_FAT	GO:0000902~cell morphogenesis	45	4.58716	5.42978e-07	RAB3A, CCK, ERBB3, PAX6, SOX9, MYCBP2, ATP2B2, IGF1R, PTK2, NDE1, MACF1, UNC5B, ANK3, UNC5A, TNR, LHX2, RAC1, CLASP1, SEMA3B, CLASP2, DLG1, EGFR, LIPA, CREB1, MAP1B, KIF5C, NFASC, LIFR, NRXN1, GAS7, EPHA4, SEMA6A, P2RX7, ERBB2IP, S100B, CNTN2, MAPK8IP3, VCAN, EFNA5, MAP7, APBB2, FEZ2, CACNA1A, GAP43, KALRN	755	356	13528	2.2649	0.00148286	0.000148385	0.000967571
GOTERM_BP_FAT	GO:0010629~negative regulation of gene expression	57	5.8104	5.66802e-07	MEF2C, THRB, DICER1, ZEB2, CBFA2T2, CBX5, ZNF148, ATP8B1, LRRFIP1, OLIG2, INSR, KHDRBS1, ZNF281, SATB1, PTPRK, SATB2, CTBP2, ARID5B, ZHX1, MECP2, SPEN, FOXN3, NRIP1, PURA, TRIM33, BPTF, HIPK2, ZFPM2, MDM4, CUX2, ST18, CUX1, LCOR, SMARCA4, MTDH, SOX2, TAF9B, ZBTB16, SOX9, TNRC6C, POU3F3, TNRC6B, TCF4, TNRC6A, TCF25, ZBTB7A, NACC2, EHMT1, RYBP, ZNF24, STAT3, CDKN1C, ID2, BNIP3L, RBPJ, NFIC, NCOR2	755	504	13528	2.02643	0.00154787	0.000140815	0.00101002
GOTERM_BP_FAT	GO:0048858~cell projection morphogenesis	35	3.56779	7.7306e-07	RAB3A, CCK, ERBB3, PAX6, MYCBP2, IGF1R, PTK2, MACF1, UNC5B, ANK3, UNC5A, TNR, LHX2, RAC1, SEMA3B, EGFR, CREB1, MAP1B, KIF5C, LIFR, NFASC, NRXN1, GAS7, SEMA6A, EPHA4, S100B, CNTN2, MAPK8IP3, EFNA5, VCAN, APBB2, FEZ2, GAP43, CACNA1A, KALRN	755	245	13528	2.5597	0.00211054	0.000176049	0.00137757
GOTERM_BP_FAT	GO:0000904~cell morphogenesis involved in differentiation	34	3.46585	2.02036e-06	RAB3A, CCK, ERBB3, PAX6, SOX9, MYCBP2, ATP2B2, IGF1R, PTK2, MACF1, UNC5B, ANK3, UNC5A, TNR, LHX2, RAC1, SEMA3B, CREB1, MAP1B, KIF5C, NFASC, NRXN1, SEMA6A, EPHA4, S100B, CNTN2, MAPK8IP3, EFNA5, VCAN, APBB2, FEZ2, GAP43, CACNA1A, KALRN	755	244	13528	2.49675	0.00550642	0.000424651	0.00360017
GOTERM_BP_FAT	GO:0032990~cell part morphogenesis	35	3.56779	2.14425e-06	RAB3A, CCK, ERBB3, PAX6, MYCBP2, IGF1R, PTK2, MACF1, UNC5B, ANK3, UNC5A, TNR, LHX2, RAC1, SEMA3B, EGFR, CREB1, MAP1B, KIF5C, LIFR, NFASC, NRXN1, GAS7, SEMA6A, EPHA4, S100B, CNTN2, MAPK8IP3, EFNA5, VCAN, APBB2, FEZ2, GAP43, CACNA1A, KALRN	755	256	13528	2.44971	0.00584311	0.000418501	0.00382094
GOTERM_BP_FAT	GO:0022604~regulation of cell morphogenesis	23	2.34455	3.11267e-06	GNA13, MAG, PALM2-AKAP2, PLXNB1, ERMN, MAP1B, TGFB3, CDC42SE1, CDH2, GAS7, RHOU, RUFY3, TTC3, MBP, PTK2, PSEN1, FYN, MAPT, SEMA4D, AKAP2, CACNA1A, RASA1, FGD4, SPP1	755	131	13528	3.14589	0.00847086	0.000566968	0.00554657
GOTERM_BP_FAT	GO:0001508~regulation of action potential	16	1.63099	3.76298e-06	KLK6, SCN1A, PLP1, GNA11, GRIN2A, MAL, CLDN11, MBP, CD9, P2RX7, SERINC5, QKI, PLLP, SCN8A, OLIG2, PMP22	755	68	13528	4.21597	0.0102315	0.000642559	0.00670534
GOTERM_BP_FAT	GO:0016481~negative regulation of transcription	51	5.19878	4.09948e-06	MEF2C, THRB, ZEB2, CBFA2T2, CBX5, ZNF148, ATP8B1, LRRFIP1, OLIG2, KHDRBS1, ZNF281, SATB1, PTPRK, SATB2, CTBP2, ARID5B, ZHX1, MECP2, SPEN, FOXN3, NRIP1, PURA, TRIM33, BPTF, HIPK2, ZFPM2, MDM4, CUX2, ST18, CUX1, LCOR, SMARCA4, MTDH, SOX2, TAF9B, ZBTB16, SOX9, POU3F3, TCF4, TCF25, ZBTB7A, EHMT1, NACC2, ZNF24, RYBP, STAT3, CDKN1C, ID2, RBPJ, NFIC, NCOR2	755	459	13528	1.99088	0.0111414	0.000658837	0.00730494
GOTERM_BP_FAT	GO:0006928~cell motion	52	5.30071	4.92575e-06	GNA13, MTSS1, WASF2, PAX6, ZEB2, MYLIP, NDE1, CD44, UNC5B, ANK3, UNC5A, SEMA3B, PTPRK, SATB2, PLXNB1, ARID5B, KIF5C, NRXN1, CERCAM, TNS3, ASCL1, TNS1, PSEN1, CNTN2, VCAN, EFNA5, GAP43, CCK, ENPP2, CDH2, ITGB1, MYCBP2, TPM3, CD9, PTK2, MACF1, TNR, LHX2, RAC1, POU3F3, CLASP2, STRBP, PPAP2B, FLT1, NFASC, STAT3, EPHA4, SEMA6A, FYN, MAPK8IP3, APBB2, FEZ2	755	475	13528	1.96154	0.0133719	0.000747615	0.00877721
GOTERM_BP_FAT	GO:0019226~transmission of nerve impulse	42	4.28135	5.18277e-06	RAB3A, SCN1A, AGTPBP1, SNCA, CLDN11, COMT, GABBR2, MBP, CD9, SERINC5, SLC1A2, PTK2, NPTX1, SYPL1, PPP3CB, CNTNAP2, QKI, OLIG2, SHC3, NOVA1, DTNA, KLK6, STX1A, PLP1, MYO6, KIF5A, GRIN2A, MAL, ATP1A2, NRXN1, SLC17A7, GRM3, P2RX7, SLC17A6, GRIA2, PSEN1, RAB14, PLLP, SCN8A, PMP22, CACNA1A, HTR2A	755	350	13528	2.15015	0.0140647	0.000745224	0.00923518
GOTERM_BP_FAT	GO:0019228~regulation of action potential in neuron	14	1.42712	5.96653e-06	KLK6, SCN1A, PLP1, MAL, CLDN11, MBP, CD9, P2RX7, SERINC5, QKI, PLLP, SCN8A, OLIG2, PMP22	755	54	13528	4.64538	0.0161743	0.000814996	0.0106317
GOTERM_BP_FAT	GO:0051172~negative regulation of nitrogen compound metabolic process	55	5.60652	6.65555e-06	MEF2C, THRB, TGFB3, ZEB2, CBFA2T2, CBX5, ZNF148, ATP8B1, LRRFIP1, OLIG2, KHDRBS1, ZNF281, SATB1, PTPRK, SATB2, CTBP2, ARID5B, ZHX1, MECP2, TTF1, SPEN, FOXN3, NRIP1, PURA, TRIM33, BPTF, HIPK2, ZFPM2, MDM4, CUX2, ST18, CUX1, LCOR, SMARCA4, MTDH, SOX2, TAF9B, COMT, ZBTB16, SOX9, POU3F3, TCF4, TCF25, TERF1, ZBTB7A, NACC2, EHMT1, RYBP, ZNF24, STAT3, CDKN1C, ID2, RBPJ, NFIC, NCOR2	755	519	13528	1.89881	0.0180252	0.0008658	0.0118594
GOTERM_BP_FAT	GO:0009890~negative regulation of biosynthetic process	59	6.01427	7.04014e-06	MEF2C, THRB, PDGFA, TGFB3, ZEB2, CBFA2T2, CBX5, ZNF148, ATP8B1, LRRFIP1, OLIG2, KHDRBS1, ZNF281, SATB1, PTPRK, SATB2, CTBP2, ARID5B, ZHX1, MECP2, TTF1, SPEN, FOXN3, PURA, NRIP1, TRIM33, BPTF, HIPK2, ZFPM2, MDM4, CUX2, ST18, CUX1, LCOR, SMARCA4, MTDH, SOX2, TAF9B, ZBTB16, SOX9, PAIP2B, POU3F3, TCF4, TCF25, TNRC6A, TERF1, HHATL, ZBTB7A, NACC2, EHMT1, RYBP, ZNF24, STAT3, CDKN1C, ID2, RBPJ, NFIC, CAC…	755	573	13528	1.84495	0.0190568	0.000874198	0.0125446
GOTERM_BP_FAT	GO:0060541~respiratory system development	20	2.03874	7.2289e-06	RAB3A, LIPA, PDGFA, TMBIM6, DICER1, SOX2, TGFB3, ASCL1, MAN2A1, TNS3, SPRY2, CHD7, SP3, DHCR7, MAPK8IP3, ZFPM2, HHIP, CUX1, FGF1, NFIB	755	108	13528	3.31813	0.0195628	0.000858616	0.012881
GOTERM_BP_FAT	GO:0010558~negative regulation of macromolecule biosynthetic process	57	5.8104	7.27374e-06	MEF2C, THRB, TGFB3, ZEB2, CBFA2T2, CBX5, ZNF148, ATP8B1, LRRFIP1, OLIG2, KHDRBS1, ZNF281, SATB1, PTPRK, SATB2, CTBP2, ARID5B, ZHX1, MECP2, TTF1, SPEN, FOXN3, NRIP1, PURA, TRIM33, BPTF, HIPK2, ZFPM2, MDM4, CUX2, ST18, CUX1, LCOR, SMARCA4, MTDH, SOX2, TAF9B, ZBTB16, SOX9, PAIP2B, POU3F3, TCF4, TNRC6A, TCF25, TERF1, HHATL, ZBTB7A, NACC2, EHMT1, RYBP, ZNF24, STAT3, CDKN1C, ID2, RBPJ, NFIC, NCOR2	755	547	13528	1.86713	0.0196829	0.000827957	0.0129609
GOTERM_BP_FAT	GO:0031327~negative regulation of cellular biosynthetic process	58	5.91233	7.54743e-06	MEF2C, THRB, PDGFA, TGFB3, ZEB2, CBFA2T2, CBX5, ZNF148, ATP8B1, LRRFIP1, OLIG2, KHDRBS1, ZNF281, SATB1, PTPRK, SATB2, CTBP2, ARID5B, ZHX1, MECP2, TTF1, SPEN, FOXN3, NRIP1, PURA, TRIM33, BPTF, HIPK2, ZFPM2, MDM4, CUX2, ST18, CUX1, LCOR, SMARCA4, MTDH, SOX2, TAF9B, ZBTB16, SOX9, PAIP2B, POU3F3, TCF4, TCF25, TNRC6A, TERF1, ZBTB7A, NACC2, EHMT1, RYBP, ZNF24, STAT3, CDKN1C, ID2, RBPJ, NFIC, CACNA1A, N…	755	561	13528	1.85247	0.0204159	0.000824747	0.0134485
GOTERM_BP_FAT	GO:0045892~negative regulation of transcription, DNA-dependent	42	4.28135	7.88651e-06	MEF2C, MTDH, SOX2, TAF9B, ZBTB16, SOX9, CBFA2T2, CBX5, ZNF148, POU3F3, OLIG2, TCF4, TCF25, ZNF281, ZBTB7A, SATB1, SATB2, EHMT1, CTBP2, ARID5B, ZHX1, RYBP, MECP2, SPEN, STAT3, FOXN3, PURA, NRIP1, CDKN1C, BPTF, ID2, HIPK2, ZFPM2, MDM4, CUX2, ST18, RBPJ, NFIC, LCOR, CUX1, NCOR2, SMARCA4	755	356	13528	2.11391	0.0213233	0.000828653	0.0140527
GOTERM_BP_FAT	GO:0045934~negative regulation of nucleobase, nucleoside, nucleotide and nucleic acid metabolic process	54	5.50459	9.38631e-06	MEF2C, THRB, TGFB3, ZEB2, CBFA2T2, CBX5, ZNF148, ATP8B1, LRRFIP1, OLIG2, KHDRBS1, ZNF281, SATB1, PTPRK, SATB2, CTBP2, ARID5B, ZHX1, MECP2, TTF1, SPEN, FOXN3, NRIP1, PURA, TRIM33, BPTF, HIPK2, ZFPM2, MDM4, CUX2, ST18, CUX1, LCOR, SMARCA4, MTDH, SOX2, TAF9B, ZBTB16, SOX9, POU3F3, TCF4, TCF25, TERF1, ZBTB7A, NACC2, EHMT1, RYBP, ZNF24, STAT3, CDKN1C, ID2, RBPJ, NFIC, NCOR2	755	512	13528	1.88978	0.0253267	0.000949657	0.0167249
GOTERM_BP_FAT	GO:0051253~negative regulation of RNA metabolic process	42	4.28135	1.18452e-05	MEF2C, MTDH, SOX2, TAF9B, ZBTB16, SOX9, CBFA2T2, CBX5, ZNF148, POU3F3, OLIG2, TCF4, TCF25, ZNF281, ZBTB7A, SATB1, SATB2, EHMT1, CTBP2, ARID5B, ZHX1, RYBP, MECP2, SPEN, STAT3, FOXN3, PURA, NRIP1, CDKN1C, BPTF, ID2, HIPK2, ZFPM2, MDM4, CUX2, ST18, RBPJ, NFIC, LCOR, CUX1, NCOR2, SMARCA4	755	362	13528	2.07887	0.0318548	0.00115552	0.0211059
GOTERM_BP_FAT	GO:0035295~tube development	30	3.0581	1.38076e-05	GNA13, RAB3A, PDGFA, PGF, LMO4, DICER1, TGFB3, ZEB2, GREM1, ZIC2, MAP3K7, SPRY2, CD44, DHCR7, HHIP, FGF1, LIPA, FLT1, TMBIM6, SHANK3, TNS3, MAN2A1, MIB1, PSEN1, SP3, SALL1, MAPK8IP3, ZFPM2, CUX1, NFIB	755	220	13528	2.44335	0.0370333	0.00130041	0.024602
GOTERM_BP_FAT	GO:0006796~phosphate metabolic process	86	8.76656	1.90983e-05	CDK19, CDK18, SLC20A1, CDC14B, NUAK1, TBK1, SNCA, TGFB3, CLK1, LPAR1, MAP3K7, PDPK1, PAK2, MAP3K9, AAK1, GAB1, PIK3CA, SYNJ2, BRD4, TLK2, INSR, EGFR, SRPK2, PTPRK, TWF1, SGK1, WNK1, PKN2, PIM3, PRKCE, SPAG9, DDR1, MAP4K4, MAST4, MAP4K5, HIPK1, PSEN1, MTMR10, HIPK2, CDK2AP1, KSR1, MAP3K13, NEK7, KALRN, FGFR2, INPP1, NEK3, ERBB3, ENPP2, PTPLAD1, CAMK2G, MKNK2, ADRBK2, MKNK1, PXK, PPM1B, TRIB2, UHMK…	755	973	13528	1.5837	0.0508574	0.00173836	0.0340273
GOTERM_BP_FAT	GO:0006793~phosphorus metabolic process	86	8.76656	1.90983e-05	CDK19, CDK18, SLC20A1, CDC14B, NUAK1, TBK1, SNCA, TGFB3, CLK1, LPAR1, MAP3K7, PDPK1, PAK2, MAP3K9, AAK1, GAB1, PIK3CA, SYNJ2, BRD4, TLK2, INSR, EGFR, SRPK2, PTPRK, TWF1, SGK1, WNK1, PKN2, PIM3, PRKCE, SPAG9, DDR1, MAP4K4, MAST4, MAP4K5, HIPK1, PSEN1, MTMR10, HIPK2, CDK2AP1, KSR1, MAP3K13, NEK7, KALRN, FGFR2, INPP1, NEK3, ERBB3, ENPP2, PTPLAD1, CAMK2G, MKNK2, ADRBK2, MKNK1, PXK, PPM1B, TRIB2, UHMK…	755	973	13528	1.5837	0.0508574	0.00173836	0.0340273
GOTERM_BP_FAT	GO:0010605~negative regulation of macromolecule metabolic process	69	7.03364	2.26732e-05	MEF2C, THRB, DICER1, SNCA, TGFB3, ZEB2, CBFA2T2, CBX5, ZNF148, ATP8B1, OLIG2, LRRFIP1, INSR, DNAJC1, KHDRBS1, ZNF281, SATB1, PTPRK, SATB2, CTBP2, ANAPC5, ARID5B, ZHX1, MECP2, GRIN2A, TTF1, SPEN, FOXN3, PURA, NRIP1, PSEN1, TRIM33, BPTF, HIPK2, ZFPM2, ST18, CUX2, MDM4, CUX1, LCOR, SMARCA4, MTDH, SOX2, TAF9B, ZBTB16, SOX9, PAIP2B, TNRC6C, SET, POU3F3, TNRC6B, TCF4, TCF25, TNRC6A, BUB3, TERF1, HHATL,…	755	734	13528	1.68438	0.0600858	0.00199693	0.0403955
GOTERM_BP_FAT	GO:0007411~axon guidance	19	1.9368	2.36049e-05	KIF5C, NFASC, PAX6, NRXN1, MYCBP2, SEMA6A, EPHA4, UNC5B, UNC5A, ANK3, LHX2, TNR, RAC1, MAPK8IP3, SEMA3B, EFNA5, APBB2, FEZ2, GAP43	755	107	13528	3.18168	0.0624759	0.002014	0.042055
GOTERM_BP_FAT	GO:0031344~regulation of cell projection organization	17	1.73293	2.8525e-05	MAG, PLXNB1, ERMN, MAP1B, TGFB3, CDH2, RUFY3, MBP, PTK2, PSEN1, MAPT, RAC1, NTRK2, SEMA4D, CACNA1A, SPP1, KALRN	755	89	13528	3.42252	0.0749985	0.00235963	0.0508187
GOTERM_BP_FAT	GO:0016310~phosphorylation	73	7.44139	3.32226e-05	CDK19, CDK18, TBK1, NUAK1, SNCA, TGFB3, LPAR1, CLK1, MAP3K7, PDPK1, PAK2, MAP3K9, AAK1, GAB1, PIK3CA, BRD4, TLK2, INSR, EGFR, SRPK2, TWF1, SGK1, WNK1, PKN2, PIM3, PRKCE, SPAG9, DDR1, MAST4, MAP4K4, MAP4K5, HIPK1, PSEN1, HIPK2, CDK2AP1, KSR1, MAP3K13, NEK7, KALRN, FGFR2, NEK3, ERBB3, PTPLAD1, CAMK2G, MKNK2, ADRBK2, MKNK1, PXK, UHMK1, TRIB2, IGF1R, PTK2, SBK1, TTBK2, MAP3K2, TNKS, YES1, STK38L, PIK…	755	800	13528	1.63501	0.0867987	0.00266699	0.0591855
GOTERM_BP_FAT	GO:0007242~intracellular signaling cascade	104	10.6014	3.44895e-05	GNA13, ADCY1, ADCY2, PLEKHM1, TBK1, GNA11, TGFB3, ITPKB, LPAR1, IQGAP1, MAP3K7, PRKAR2A, DIRAS2, MAP3K9, GAB1, PIK3CA, RAPGEF5, H2AFX, TLK2, RAPGEF2, INSR, PAG1, EGFR, PLD1, MYO6, NUDT4, CRYAB, PLXNB1, WNK1, SOCS7, ARID1A, MED13, FOXN3, SPAG9, TNS3, MAP4K4, MAP4K5, RND1, RAB14, ARL8A, KALRN, ERBB3, GNAI1, PTPLAD1, NFKBIA, ARFGEF2, KRAS, RAC1, STK38L, FGD4, KLF9, TAX1BP3, SHANK3, P2RX7, PLCXD2, PR…	755	1256	13528	1.48365	0.0899553	0.00268956	0.0614418
GOTERM_BP_FAT	GO:0045664~regulation of neuron differentiation	21	2.14067	4.57613e-05	MAG, PLXNB1, SOX2, MAP1B, PAX6, CDH2, TTC3, RUFY3, MBP, ASCL1, MIB1, PTK2, PSEN1, MAPT, S1PR5, NTRK2, SEMA4D, NKX2-2, CACNA1A, SPP1, KALRN	755	133	13528	2.82914	0.117563	0.00346809	0.0815142
GOTERM_BP_FAT	GO:0042391~regulation of membrane potential	21	2.14067	5.10365e-05	KLK6, SCN1A, PLP1, CCK, GNA11, SNCA, GRIN2A, MAL, CLDN11, MBP, CD9, P2RX7, SERINC5, PSEN1, PPP3CB, QKI, PLLP, OLIG2, SCN8A, PMP22, CACNA1A	755	134	13528	2.80803	0.130195	0.0037628	0.0909069
GOTERM_BP_FAT	GO:0051056~regulation of small GTPase mediated signal transduction	31	3.16004	7.02201e-05	PREX1, ASAP1, RABGAP1L, ITPKB, LPAR1, CDH2, ARFGEF2, IQGAP1, MCF2L, ADAP1, KRAS, RASGRP3, SOS2, RAC1, TBC1D5, RAPGEF5, RAP1GAP2, RAPGEF2, AGAP1, RASA1, RASA2, FGD4, RALBP1, PSD3, SIPA1L2, RICTOR, RALGDS, ARHGEF10, NOTCH2, RALGAPA2, KALRN	755	252	13528	2.20418	0.174626	0.00503775	0.125057
GOTERM_BP_FAT	GO:0008366~axon ensheathment	11	1.1213	7.86699e-05	KLK6, CD9, SERINC5, PLP1, QKI, PLLP, MAL, OLIG2, CLDN11, PMP22, MBP	755	42	13528	4.69278	0.193469	0.00549799	0.140095
GOTERM_BP_FAT	GO:0007272~ensheathment of neurons	11	1.1213	7.86699e-05	KLK6, CD9, SERINC5, PLP1, QKI, PLLP, MAL, OLIG2, CLDN11, PMP22, MBP	755	42	13528	4.69278	0.193469	0.00549799	0.140095
GOTERM_BP_FAT	GO:0007167~enzyme linked receptor protein signaling pathway	38	3.8736	8.34571e-05	FGFR2, MTSS1, PDGFA, ERBB3, TGFB3, MAP3K7, PHIP, IGF1R, UBE2D3, PTK2, GAB1, PTN, SHC3, FGF1, INSR, PIK3R1, TXNIP, EGFR, PTPRK, IRS2, PTPRD, FLT1, SMAD9, CREB1, ARID5B, LIFR, SOCS7, STAT3, EPHA4, DDR1, ERBB2IP, HIPK2, NTRK2, SORT1, SPTBN1, CACNA1A, PLEKHA1, TOB1	755	342	13528	1.99088	0.203954	0.00568622	0.148615
GOTERM_BP_FAT	GO:0030324~lung development	17	1.73293	0.000108549	RAB3A, LIPA, PDGFA, TMBIM6, DICER1, TGFB3, MAN2A1, SPRY2, TNS3, SP3, DHCR7, MAPK8IP3, ZFPM2, HHIP, FGF1, CUX1, NFIB	755	99	13528	3.07681	0.256719	0.00721	0.193256
GOTERM_BP_FAT	GO:0010975~regulation of neuron projection development	14	1.42712	0.000111948	MAG, PTK2, PSEN1, PLXNB1, MAPT, MAP1B, NTRK2, SEMA4D, CDH2, CACNA1A, RUFY3, MBP, SPP1, KALRN	755	70	13528	3.58358	0.263592	0.00725856	0.199301
GOTERM_BP_FAT	GO:0051129~negative regulation of cellular component organization	21	2.14067	0.000116815	MAG, MAP1B, SNCA, RDX, MID1IP1, TTC3, RUFY3, MBP, PTK2, SET, PSEN1, MAPT, RAC1, MAP4, SPTBN1, CLASP1, CLASP2, TPR, MAP6D1, SPP1, TERF1	755	142	13528	2.64983	0.273324	0.0073975	0.207958
GOTERM_BP_FAT	GO:0007026~negative regulation of microtubule depolymerization	7	0.713558	0.000145272	MAPT, MAP1B, MAP4, CLASP1, CLASP2, MID1IP1, MAP6D1	755	16	13528	7.83907	0.327704	0.00898343	0.258555
GOTERM_BP_FAT	GO:0031114~regulation of microtubule depolymerization	7	0.713558	0.000145272	MAPT, MAP1B, MAP4, CLASP1, CLASP2, MID1IP1, MAP6D1	755	16	13528	7.83907	0.327704	0.00898343	0.258555
GOTERM_BP_FAT	GO:0043406~positive regulation of MAP kinase activity	17	1.73293	0.000155819	EGFR, PTPLAD1, TGFB3, ZEB2, LPAR1, SPAG9, P2RX7, MAP4K5, KRAS, PSEN1, MAP3K2, MAP3K9, GAB1, MAPK8IP3, INSR, FGD4, HTR2A	755	102	13528	2.98631	0.34681	0.00941952	0.277303
GOTERM_BP_FAT	GO:0030323~respiratory tube development	17	1.73293	0.000155819	RAB3A, LIPA, PDGFA, TMBIM6, DICER1, TGFB3, MAN2A1, SPRY2, TNS3, SP3, DHCR7, MAPK8IP3, ZFPM2, HHIP, FGF1, CUX1, NFIB	755	102	13528	2.98631	0.34681	0.00941952	0.277303
GOTERM_BP_FAT	GO:0042552~myelination	10	1.01937	0.000186954	KLK6, CD9, SERINC5, PLP1, QKI, PLLP, MAL, OLIG2, PMP22, MBP	755	38	13528	4.71523	0.400101	0.0110471	0.332625
GOTERM_BP_FAT	GO:0007243~protein kinase cascade	39	3.97554	0.000199001	GNA13, TBK1, ERBB3, PTPLAD1, MKNK2, TGFB3, NFKBIA, MKNK1, ITPKB, LPAR1, MAP3K7, IGF1R, RASGRP3, MAP3K2, MAP3K9, RB1CC1, GAB1, PIK3CA, FGF1, RAPGEF2, STK38L, INSR, PIK3R1, FGD4, EGFR, SRPK2, FLT1, CRYAB, WNK1, SHANK3, STAT3, SPAG9, MAP4K4, MAP4K5, P2RX7, PSEN1, FYN, MAPK8IP3, MAP3K13	755	370	13528	1.88864	0.419534	0.0115061	0.354023
GOTERM_BP_FAT	GO:0031111~negative regulation of microtubule polymerization or depolymerization	7	0.713558	0.000213974	MAPT, MAP1B, MAP4, CLASP1, CLASP2, MID1IP1, MAP6D1	755	17	13528	7.37795	0.442813	0.0121105	0.380612
GOTERM_BP_FAT	GO:0031110~regulation of microtubule polymerization or depolymerization	9	0.917431	0.000224902	MACF1, MAPT, MAP1B, MAP4, CLASP1, CLASP2, MID1IP1, TERF1, MAP6D1	755	31	13528	5.20197	0.459211	0.0124671	0.400014
GOTERM_BP_FAT	GO:0050770~regulation of axonogenesis	12	1.22324	0.000262344	MAG, PTK2, PSEN1, PLXNB1, MAPT, MAP1B, SEMA4D, CDH2, CACNA1A, RUFY3, MBP, SPP1	755	57	13528	3.77219	0.511825	0.0142393	0.466462
GOTERM_BP_FAT	GO:0010769~regulation of cell morphogenesis involved in differentiation	14	1.42712	0.000302433	MAG, PTK2, PSEN1, PLXNB1, MAPT, MAP1B, TGFB3, SEMA4D, CDH2, RUFY3, CACNA1A, TTC3, MBP, SPP1	755	77	13528	3.2578	0.562498	0.0160786	0.537561
GOTERM_BP_FAT	GO:0031644~regulation of neurological system process	21	2.14067	0.000324369	EGFR, TF, RAB3A, STX1A, CCK, GNAI3, MYO6, MAP1B, SNCA, GRIN2A, CDH2, PXK, ATP2B2, GRM3, KRAS, PSEN1, GRIA2, NTRK2, PPP3CB, CACNA1A, HTR2A	755	153	13528	2.45932	0.587964	0.0169063	0.576444
GOTERM_BP_FAT	GO:0050767~regulation of neurogenesis	22	2.24261	0.000365438	MAG, ZNF488, PLXNB1, SOX2, MAP1B, PAX6, CDH2, TTC3, RUFY3, MBP, ASCL1, MIB1, PTK2, PSEN1, MAPT, S1PR5, NTRK2, SEMA4D, NKX2-2, CACNA1A, KALRN, SPP1	755	166	13528	2.37466	0.631724	0.0186711	0.649204
GOTERM_BP_FAT	GO:0016192~vesicle-mediated transport	53	5.40265	0.000386839	COPA, SRCIN1, HIP1R, MARCKSL1, WASF2, SNCA, SORL1, MEGF10, PICALM, VPS13A, SH3GL3, STX1A, MYO6, STXBP3, NPC1, PSEN1, STXBP5, RAB14, SH3KBP1, RIN2, SORT1, VAMP3, VAMP2, CUX1, VAMP1, BIN1, TRAPPC10, KALRN, RAB3A, GNAI3, CDC42SE1, ARFGEF2, PEX5L, KRAS, OSBPL1A, STX16, PLIN3, RAC1, SNAP23, HIP1, RHOBTB3, SH3BP4, P2RX7, FNBP1, TFRC, CADPS2, GRIA2, SYT13, MAPK8IP3, SYTL2, GOSR1, LRP2, CACNA1A	755	576	13528	1.64869	0.652654	0.0193916	0.687101
GOTERM_BP_FAT	GO:0051347~positive regulation of transferase activity	28	2.85423	0.000399713	ADCY1, CCK, ADCY2, PTPLAD1, TGFB3, ZEB2, LPAR1, MAP3K7, PRKAR2A, SERINC5, PDPK1, KRAS, MAP3K2, MAP3K9, GAB1, RAC1, INSR, FGD4, EGFR, FLT1, SPAG9, P2RX7, MAP4K5, PSEN1, MAPK8IP3, MAP3K13, GAP43, HTR2A	755	240	13528	2.09042	0.664668	0.01967	0.709891
GOTERM_BP_FAT	GO:0070507~regulation of microtubule cytoskeleton organization	10	1.01937	0.000418638	XPO1, MACF1, MAPT, MAP1B, MAP4, CLASP1, CLASP2, MID1IP1, TERF1, MAP6D1	755	42	13528	4.26616	0.681578	0.0202279	0.743383
GOTERM_BP_FAT	GO:0000122~negative regulation of transcription from RNA polymerase II promoter	30	3.0581	0.000418693	MEF2C, MTDH, SOX2, TAF9B, ZNF148, POU3F3, OLIG2, TCF4, TCF25, ZNF281, SATB1, ZBTB7A, SATB2, EHMT1, RYBP, MECP2, STAT3, NRIP1, CDKN1C, BPTF, ID2, HIPK2, ZFPM2, ST18, MDM4, CUX1, NFIC, LCOR, NCOR2, SMARCA4	755	266	13528	2.02081	0.681626	0.0198792	0.743481
GOTERM_BP_FAT	GO:0033674~positive regulation of kinase activity	27	2.75229	0.000504421	ADCY1, ADCY2, CCK, PTPLAD1, TGFB3, ZEB2, LPAR1, MAP3K7, PDPK1, PRKAR2A, KRAS, MAP3K2, MAP3K9, RAC1, GAB1, INSR, FGD4, EGFR, FLT1, SPAG9, MAP4K5, P2RX7, PSEN1, MAPK8IP3, MAP3K13, GAP43, HTR2A	755	231	13528	2.0943	0.748152	0.0234943	0.895065
GOTERM_BP_FAT	GO:0051969~regulation of transmission of nerve impulse	20	2.03874	0.000522849	EGFR, TF, RAB3A, STX1A, GNAI3, MYO6, MAP1B, SNCA, GRIN2A, CDH2, PXK, ATP2B2, GRM3, KRAS, PSEN1, GRIA2, NTRK2, PPP3CB, CACNA1A, HTR2A	755	147	13528	2.43781	0.760528	0.0239347	0.927621
GOTERM_BP_FAT	GO:0000165~MAPKKK cascade	23	2.34455	0.000589418	EGFR, FLT1, CRYAB, PTPLAD1, TGFB3, ITPKB, LPAR1, SHANK3, MAP3K7, SPAG9, P2RX7, MAP4K5, PSEN1, RASGRP3, MAP3K2, MAP3K9, RB1CC1, GAB1, MAPK8IP3, RAPGEF2, INSR, MAP3K13, FGD4	755	184	13528	2.23974	0.800383	0.0264985	1.04514
GOTERM_BP_FAT	GO:0045860~positive regulation of protein kinase activity	26	2.65036	0.000680286	ADCY1, ADCY2, CCK, PTPLAD1, TGFB3, ZEB2, LPAR1, MAP3K7, PDPK1, PRKAR2A, KRAS, MAP3K2, MAP3K9, GAB1, INSR, FGD4, EGFR, FLT1, SPAG9, MAP4K5, P2RX7, PSEN1, MAPK8IP3, MAP3K13, GAP43, HTR2A	755	223	13528	2.08908	0.844305	0.0300293	1.20534
GOTERM_BP_FAT	GO:0007169~transmembrane receptor protein tyrosine kinase signaling pathway	26	2.65036	0.000726464	FGFR2, MTSS1, PDGFA, ERBB3, PHIP, IGF1R, PTK2, GAB1, FGF1, SHC3, INSR, PIK3R1, TXNIP, EGFR, IRS2, FLT1, ARID5B, SOCS7, STAT3, DDR1, EPHA4, ERBB2IP, NTRK2, SORT1, CACNA1A, PLEKHA1	755	224	13528	2.07975	0.862777	0.031527	1.28667
GOTERM_BP_FAT	GO:0043405~regulation of MAP kinase activity	19	1.9368	0.000841205	EGFR, PTPLAD1, TGFB3, ZEB2, LPAR1, TRIB2, SPAG9, SPRY2, P2RX7, MAP4K5, KRAS, PSEN1, MAP3K2, MAP3K9, GAB1, MAPK8IP3, INSR, FGD4, HTR2A	755	141	13528	2.41447	0.899739	0.0358493	1.48845
GOTERM_BP_FAT	GO:0006357~regulation of transcription from RNA polymerase II promoter	62	6.32008	0.000855807	MEF2C, THRB, PAX6, TGFB3, CNOT2, FOXO3, CBFB, ZBTB38, TRAK2, ZNF148, LRRFIP1, OLIG2, ZNF281, SATB1, SOX10, SATB2, MYO6, YY1, MECP2, TTF1, SPEN, MED13, NRIP1, ASCL1, BPTF, HIPK2, ZFPM2, ST18, MDM4, CUX1, LCOR, SMARCA4, MTDH, LITAF, SOX2, TAF9B, NFKBIA, ABCA2, SOX9, TCF7L2, SOX8, POU3F3, TCF4, VEZF1, TCF25, NKX2-2, ZBTB7A, KLF6, EHMT1, KLF9, CREB1, RYBP, TEAD1, MED13L, STAT3, CDKN1C, CSRNP3, ID2, Z…	755	727	13528	1.52807	0.903665	0.035901	1.5141
GOTERM_BP_FAT	GO:0033043~regulation of organelle organization	25	2.54842	0.00104465	XPO1, RAB3A, PDGFA, MAP1B, SNCA, RDX, RICTOR, MID1IP1, MYCBP2, P2RX7, SET, MACF1, MAPT, RAC1, MAP4, SPTBN1, CLASP1, TNKS, CLASP2, TLK2, TPR, INSR, RASA1, MAP6D1, TERF1	755	217	13528	2.06427	0.942532	0.0429948	1.84528
GOTERM_BP_FAT	GO:0051960~regulation of nervous system development	23	2.34455	0.00104592	MAG, TF, ZNF488, PLXNB1, SOX2, MAP1B, PAX6, CDH2, RUFY3, TTC3, MBP, ASCL1, MIB1, PTK2, PSEN1, MAPT, S1PR5, NTRK2, SEMA4D, NKX2-2, CACNA1A, KALRN, SPP1	755	192	13528	2.14641	0.942731	0.0424077	1.8475
GOTERM_BP_FAT	GO:0007268~synaptic transmission	31	3.16004	0.00124531	RAB3A, AGTPBP1, SNCA, GABBR2, COMT, MBP, SLC1A2, PTK2, NPTX1, SYPL1, PPP3CB, SHC3, NOVA1, DTNA, PLP1, STX1A, MYO6, KIF5A, GRIN2A, ATP1A2, NRXN1, SLC17A7, GRM3, P2RX7, SLC17A6, GRIA2, PSEN1, RAB14, PMP22, CACNA1A, HTR2A	755	298	13528	1.86394	0.966811	0.0495589	2.19602
GOTERM_BP_FAT	GO:0032886~regulation of microtubule-based process	10	1.01937	0.00136069	XPO1, MACF1, MAPT, MAP1B, MAP4, CLASP1, CLASP2, MID1IP1, TERF1, MAP6D1	755	49	13528	3.65671	0.975798	0.0532546	2.39718
GOTERM_BP_FAT	GO:0050804~regulation of synaptic transmission	18	1.83486	0.00146562	EGFR, RAB3A, STX1A, GNAI3, MYO6, SNCA, MAP1B, GRIN2A, PXK, ATP2B2, GRM3, KRAS, PSEN1, GRIA2, NTRK2, PPP3CB, CACNA1A, HTR2A	755	136	13528	2.37148	0.981839	0.0564386	2.57976
GOTERM_BP_FAT	GO:0051493~regulation of cytoskeleton organization	18	1.83486	0.00146562	XPO1, PDGFA, MAP1B, RDX, RICTOR, MID1IP1, MYCBP2, P2RX7, MACF1, MAPT, RAC1, MAP4, SPTBN1, CLASP1, CLASP2, RASA1, MAP6D1, TERF1	755	136	13528	2.37148	0.981839	0.0564386	2.57976
GOTERM_BP_FAT	GO:0043507~positive regulation of JUN kinase activity	8	0.815494	0.00160665	MAP4K5, MAP3K2, PTPLAD1, MAP3K9, GAB1, MAPK8IP3, ZEB2, FGD4	755	32	13528	4.47947	0.987655	0.0608487	2.82466
GOTERM_BP_FAT	GO:0043242~negative regulation of protein complex disassembly	9	0.917431	0.00166285	MAPT, MAP1B, SPTBN1, MAP4, RDX, CLASP1, CLASP2, MID1IP1, MAP6D1	755	41	13528	3.93319	0.989415	0.0620526	2.92209
GOTERM_BP_FAT	GO:0010639~negative regulation of organelle organization	13	1.32518	0.00187088	SNCA, MAP1B, RDX, MID1IP1, SET, MAPT, MAP4, SPTBN1, CLASP1, CLASP2, TPR, TERF1, MAP6D1	755	82	13528	2.84064	0.994011	0.0686144	3.28192
GOTERM_BP_FAT	GO:0010001~glial cell differentiation	10	1.01937	0.00240631	EGFR, ASCL1, SOX10, ZNF488, PLP1, ERBB3, OLIG2, NKX2-2, GAP43, SMARCA4	755	53	13528	3.38073	0.998618	0.0862488	4.20231
GOTERM_BP_FAT	GO:0060284~regulation of cell development	23	2.34455	0.00243072	MAG, ZNF488, PLXNB1, SOX2, MAP1B, TGFB3, PAX6, CDH2, RUFY3, TTC3, MBP, ASCL1, MIB1, PTK2, PSEN1, MAPT, S1PR5, NTRK2, SEMA4D, NKX2-2, CACNA1A, KALRN, SPP1	755	205	13528	2.0103	0.998708	0.0859606	4.24407
GOTERM_BP_FAT	GO:0016044~membrane organization	36	3.66972	0.00252096	RAB3A, COPA, GNAI3, HIP1R, WASF2, SORL1, SNCA, CDC42SE1, MEGF10, CD9, KRAS, DYSF, PICALM, RAC1, ZMPSTE24, SNAP23, HIP1, SH3GL3, EGFR, HSP90AA1, MYO6, SUN2, MAL, SH3BP4, FNBP1, P2RX7, NPC1, GRIA2, TFRC, SH3KBP1, RIN2, SORT1, VAMP3, VAMP2, LRP2, BIN1	755	381	13528	1.69303	0.998991	0.0878765	4.39832
GOTERM_BP_FAT	GO:0001568~blood vessel development	26	2.65036	0.00252928	GNA13, PGF, PDGFA, DICER1, WASF2, CDH2, TCF7L2, MAP3K7, ZFP36L1, PTK2, CHD7, CD44, DHCR7, QKI, FGF1, VEZF1, PPAP2B, RASA1, FLT1, APOLD1, MIB1, PSEN1, NTRK2, ZFPM2, RBPJ, SMARCA4	755	245	13528	1.90149	0.999013	0.0870457	4.41252
GOTERM_BP_FAT	GO:0046777~protein amino acid autophosphorylation	13	1.32518	0.00255178	EGFR, IGF1R, PTK2, PAK2, FYN, MAP3K9, CAMK2G, NTRK2, CLK1, YES1, MAP3K13, INSR, UHMK1	755	85	13528	2.74038	0.999072	0.0866969	4.45094
GOTERM_BP_FAT	GO:0007257~activation of JUN kinase activity	7	0.713558	0.00258899	MAP4K5, MAP3K2, PTPLAD1, MAP3K9, GAB1, MAPK8IP3, FGD4	755	26	13528	4.82404	0.999162	0.0868289	4.51444
GOTERM_BP_FAT	GO:0006897~endocytosis	24	2.44648	0.00274658	SH3GL3, RAB3A, MYO6, HIP1R, WASF2, SNCA, SORL1, CDC42SE1, MEGF10, SH3BP4, NPC1, P2RX7, FNBP1, KRAS, PICALM, TFRC, GRIA2, RAC1, SH3KBP1, RIN2, SORT1, LRP2, BIN1, HIP1	755	220	13528	1.95468	0.999456	0.0907619	4.78291
GOTERM_BP_FAT	GO:0010324~membrane invagination	24	2.44648	0.00274658	SH3GL3, RAB3A, MYO6, HIP1R, WASF2, SNCA, SORL1, CDC42SE1, MEGF10, SH3BP4, NPC1, P2RX7, FNBP1, KRAS, PICALM, TFRC, GRIA2, RAC1, SH3KBP1, RIN2, SORT1, LRP2, BIN1, HIP1	755	220	13528	1.95468	0.999456	0.0907619	4.78291
GOTERM_BP_FAT	GO:0042063~gliogenesis	11	1.1213	0.00300944	EGFR, ASCL1, SOX10, ZNF488, PLP1, ERBB3, VCAN, OLIG2, NKX2-2, GAP43, SMARCA4	755	65	13528	3.03226	0.999735	0.0978414	5.22916
GOTERM_BP_FAT	GO:0001944~vasculature development	26	2.65036	0.00351939	GNA13, PGF, PDGFA, DICER1, WASF2, CDH2, TCF7L2, MAP3K7, ZFP36L1, PTK2, CHD7, CD44, DHCR7, QKI, FGF1, VEZF1, PPAP2B, RASA1, FLT1, APOLD1, MIB1, PSEN1, NTRK2, ZFPM2, RBPJ, SMARCA4	755	251	13528	1.85604	0.999935	0.112153	6.08925
GOTERM_BP_FAT	GO:0001505~regulation of neurotransmitter levels	11	1.1213	0.00377287	SLC17A7, RAB3A, STX1A, P2RX7, SLC17A6, PSEN1, AGTPBP1, RAB14, ATP1A2, COMT, CACNA1A	755	67	13528	2.94174	0.999967	0.118372	6.51403
GOTERM_BP_FAT	GO:0043506~regulation of JUN kinase activity	8	0.815494	0.00385822	MAP4K5, MAP3K2, PTPLAD1, MAP3K9, GAB1, MAPK8IP3, ZEB2, FGD4	755	37	13528	3.87414	0.999974	0.11952	6.65666
GOTERM_BP_FAT	GO:0007010~cytoskeleton organization	39	3.97554	0.00418843	MTSS1, PREX1, WASF2, ANLN, DAAM1, ITGB1, RHOU, DAAM2, PDPK1, PTK2, NDE1, KRAS, MACF1, PAK2, ANK3, MAPT, RAC1, NEFH, CLASP1, TNKS, WIPF1, PLS3, DLG1, FGD4, FMNL2, ACTN4, CRYAB, MAP1B, ERMN, SUN2, RICTOR, CAPN3, GAS7, SEMA6A, RND1, ERBB2IP, LIMCH1, SYNM, MAP7	755	436	13528	1.60275	0.99999	0.127646	7.20651
GOTERM_BP_FAT	GO:0045165~cell fate commitment	17	1.73293	0.0045908	SOX2, PAX6, MYEF2, SOX9, SOX8, TCF7L2, ITGB1, ASCL1, SPRY2, NOTCH2, PSEN1, SALL1, OLIG2, FGF1, NKX2-2, GAP43, SMARCA4	755	139	13528	2.1914	0.999997	0.137524	7.87238
GOTERM_BP_FAT	GO:0042493~response to drug	23	2.34455	0.00459711	TXNIP, SNX27, ERBB3, PDGFA, PGF, CREB1, MAP1B, SNCA, GRIN2A, ABCA2, COMT, CAPN3, STAT3, ABCG2, P2RX7, SLC1A2, ACSL1, CPOX, GNAS, SRP72, LRP2, AACS, HTR2A	755	216	13528	1.90792	0.999997	0.136213	7.88279
GOTERM_BP_FAT	GO:0080135~regulation of cellular response to stress	14	1.42712	0.0046711	PTPLAD1, ZEB2, MAP3K7, NPC1, MAP4K5, MAP3K2, MAP3K9, HIPK2, GAB1, SEMA4C, MAPK8IP3, H2AFX, FGD4, SPP1	755	103	13528	2.43544	0.999997	0.136776	8.00473
GOTERM_BP_FAT	GO:0070302~regulation of stress-activated protein kinase signaling pathway	11	1.1213	0.00468205	MAP3K7, MAP4K5, MAP3K2, PTPLAD1, MAP3K9, HIPK2, GAB1, SEMA4C, MAPK8IP3, ZEB2, FGD4	755	69	13528	2.85647	0.999997	0.135627	8.02276
GOTERM_BP_FAT	GO:0010033~response to organic substance	58	5.91233	0.00479924	ADCY1, ADCY2, PDGFA, PGF, DICER1, SNCA, TGFB3, AQP1, PDPK1, SLC1A2, PRKAR2A, CD44, GAB1, INSR, EGFR, PLD1, IRS2, HSP90AA1, CRYAB, LIFR, GRIN2A, ADIPOR2, SOCS7, DDR1, SLC25A36, SORT1, GNAS, CA2, TF, ERBB3, TAF9B, NFKBIA, ABCA2, HSPA1A, HSPA1B, NR3C1, COMT, EDEM3, TTC3, HSPA1L, PHIP, IGF1R, KRAS, ACSL1, HSPA2, PPP3CB, PIK3R1, SPP1, TXNIP, FADS1, CREB1, MAP1B, STAT3, P2RX7, TFRC, ID2, FYN, AACS, TJP2	755	721	13528	1.44138	0.999998	0.137335	8.21555
GOTERM_BP_FAT	GO:0021781~glial cell fate commitment	4	0.407747	0.00509656	ASCL1, OLIG2, NKX2-2, SMARCA4	755	7	13528	10.2388	0.999999	0.143723	8.70295
GOTERM_BP_FAT	GO:0051338~regulation of transferase activity	34	3.46585	0.00555841	ADCY1, CCK, ADCY2, PTPLAD1, TGFB3, ZEB2, LPAR1, TRIB2, APLP2, MAP3K7, SPRY2, PDPK1, PRKAR2A, SERINC5, KRAS, PAK2, MAP3K2, MAP3K9, GAB1, RAC1, INSR, TERF1, FGD4, EGFR, FLT1, CDKN1C, SPAG9, P2RX7, MAP4K5, PSEN1, MAPK8IP3, MAP3K13, GAP43, HTR2A	755	372	13528	1.63766	1	0.15414	9.45525
GOTERM_BP_FAT	GO:0000187~activation of MAPK activity	12	1.22324	0.00563539	SPAG9, MAP4K5, P2RX7, MAP3K2, PTPLAD1, MAP3K9, GAB1, TGFB3, MAPK8IP3, LPAR1, INSR, FGD4	755	82	13528	2.62213	1	0.154546	9.58008
GOTERM_BP_FAT	GO:0006814~sodium ion transport	16	1.63099	0.00582246	SLC5A3, ATP1B1, SCN1A, SGK1, SLC38A2, SLC12A2, SLC20A1, ATP1A2, SLC17A7, SLC17A6, SLC6A8, SLC4A8, SCN8A, SLC38A1, TRAPPC10, SLC5A11	755	130	13528	2.20528	1	0.157688	9.88271
GOTERM_BP_FAT	GO:0048709~oligodendrocyte differentiation	6	0.611621	0.00632182	ASCL1, SOX10, ZNF488, PLP1, OLIG2, NKX2-2	755	22	13528	4.88669	1	0.168386	10.6859
GOTERM_BP_FAT	GO:0045893~positive regulation of transcription, DNA-dependent	41	4.17941	0.00648367	MEF2C, THRB, SOX2, PAX6, TGFB3, NFKBIA, RORB, FOXO3, SOX9, TCF7L2, SOX8, CBFB, ZBTB38, ZNF148, POU3F3, TCF4, NKX2-2, KLF6, SOX10, SATB2, MYO6, CREB1, ESRRG, TEAD1, TTF1, CREB5, ARID1A, MED13, AFF1, STAT3, NRIP1, ASCL1, NCOA3, CSRNP3, BPTF, HIPK2, ZFPM2, ZNF462, NFIC, NFIB, SMARCA4	755	477	13528	1.54011	1	0.170666	10.9448
GOTERM_BP_FAT	GO:0007264~small GTPase mediated signal transduction	29	2.95617	0.00651322	GNA13, RAB3A, PTPLAD1, WASF2, RTKN, RHOU, IQGAP1, DIRAS2, KRAS, ARHGAP5, RASGRP3, RAC1, SOS2, RAPGEF5, AGAP1, RAPGEF2, SHC3, RAP2A, PLD1, RALBP1, TAX1BP3, RALGDS, RAB31, RND1, RAB30, RIN2, RAB14, ARL8A, KSR1	755	305	13528	1.70367	1	0.169751	10.992
GOTERM_BP_FAT	GO:0043524~negative regulation of neuron apoptosis	9	0.917431	0.00679206	KRAS, PSEN1, ERBB3, HIPK2, SNCA, TGFB3, PCSK6, RASA1, CACNA1A	755	51	13528	3.16198	1	0.17471	11.4361
GOTERM_BP_FAT	GO:0043244~regulation of protein complex disassembly	9	0.917431	0.00679206	MAPT, MAP1B, SPTBN1, MAP4, RDX, CLASP1, CLASP2, MID1IP1, MAP6D1	755	51	13528	3.16198	1	0.17471	11.4361
GOTERM_BP_FAT	GO:0001708~cell fate specification	9	0.917431	0.00679206	ASCL1, PSEN1, SALL1, SOX2, OLIG2, SOX9, FGF1, ITGB1, NKX2-2	755	51	13528	3.16198	1	0.17471	11.4361
GOTERM_BP_FAT	GO:0032870~cellular response to hormone stimulus	16	1.63099	0.0071726	PHIP, IGF1R, PDPK1, ADCY1, IRS2, PRKAR2A, ADCY2, ERBB3, PGF, GAB1, ADIPOR2, SOCS7, GNAS, INSR, STAT3, PIK3R1	755	133	13528	2.15553	1	0.181882	12.0388
GOTERM_BP_FAT	GO:0051254~positive regulation of RNA metabolic process	41	4.17941	0.00738632	MEF2C, THRB, SOX2, PAX6, TGFB3, NFKBIA, RORB, FOXO3, SOX9, TCF7L2, SOX8, CBFB, ZBTB38, ZNF148, POU3F3, TCF4, NKX2-2, KLF6, SOX10, SATB2, MYO6, CREB1, ESRRG, TEAD1, TTF1, CREB5, ARID1A, MED13, AFF1, STAT3, NRIP1, ASCL1, NCOA3, CSRNP3, BPTF, HIPK2, ZFPM2, ZNF462, NFIC, NFIB, SMARCA4	755	481	13528	1.5273	1	0.185079	12.3756
GOTERM_BP_FAT	GO:0007267~cell-cell signaling	49	4.9949	0.00746331	PGF, PDGFA, AGTPBP1, SNCA, GABBR2, MBP, LNPEP, SPRY2, SLC1A2, SEMA3B, FGF1, SHC3, STX1A, MYO6, KIF5A, NUDT3, GRIN2A, NRXN1, GRM3, PSEN1, ASH1L, RAB14, SH3KBP1, EFNA5, PMP22, RAB3A, CAMK2G, SOX2, COMT, GREM1, PTK2, NPTX1, SYPL1, PPP3CB, NOVA1, DTNA, PLP1, FADS1, ATP1A2, SLC17A7, P2RX7, SLC17A6, CXCL14, GRIA2, SALL1, NTRK2, LRP2, CACNA1A, HTR2A	755	600	13528	1.46329	1	0.185139	12.4967
GOTERM_BP_FAT	GO:0043408~regulation of MAPKKK cascade	14	1.42712	0.00752713	PTPLAD1, ZEB2, LPAR1, MAP3K7, MAP4K5, P2RX7, MAP3K2, MAP3K9, GAB1, HIPK2, SEMA4C, MAPK8IP3, INSR, FGD4	755	109	13528	2.30138	1	0.184905	12.5969
GOTERM_BP_FAT	GO:0030036~actin cytoskeleton organization	23	2.34455	0.00777435	MTSS1, FMNL2, ACTN4, PREX1, ERMN, WASF2, RICTOR, DAAM1, DAAM2, ITGB1, RHOU, CAPN3, GAS7, PDPK1, RND1, KRAS, PAK2, LIMCH1, RAC1, WIPF1, PLS3, FGD4, DLG1	755	226	13528	1.8235	1	0.188703	12.984
GOTERM_BP_FAT	GO:0031098~stress-activated protein kinase signaling pathway	10	1.01937	0.00784084	MAP4K5, MAP3K2, CRYAB, PTPLAD1, MAP3K9, RB1CC1, GAB1, MAPK8IP3, MAP3K13, FGD4	755	63	13528	2.84411	1	0.188498	13.0879
GOTERM_BP_FAT	GO:0001932~regulation of protein amino acid phosphorylation	19	1.9368	0.00791185	EGFR, CCK, PDGFA, PTPLAD1, TGFB3, ZEB2, RICTOR, PRKCE, PRKAR2A, P2RX7, MAP4K5, PSEN1, MAP3K2, MAP3K9, RB1CC1, GAB1, MAPK8IP3, INSR, FGD4	755	173	13528	1.96786	1	0.188395	13.1987
GOTERM_BP_FAT	GO:0006606~protein import into nucleus	12	1.22324	0.00805844	XPO1, IPO7, PPP3CB, TGFB3, NFKBIA, SPTBN1, TNPO2, TPR, KPNA2, KPNB1, TNPO1, TOB1	755	86	13528	2.50017	1	0.189902	13.4269
GOTERM_BP_FAT	GO:0030029~actin filament-based process	24	2.44648	0.00831235	MTSS1, FMNL2, MYO6, ACTN4, PREX1, ERMN, WASF2, RICTOR, DAAM1, DAAM2, ITGB1, RHOU, CAPN3, GAS7, PDPK1, RND1, KRAS, PAK2, LIMCH1, RAC1, WIPF1, PLS3, DLG1, FGD4	755	241	13528	1.78435	1	0.193631	13.821
GOTERM_BP_FAT	GO:0001764~neuron migration	10	1.01937	0.00868583	ASCL1, NDE1, SATB2, PTK2, CCK, PSEN1, FYN, PAX6, CNTN2, APBB2	755	64	13528	2.79967	1	0.199744	14.3975
GOTERM_BP_FAT	GO:0006350~transcription	142	14.475	0.0088809	MEF2C, THRB, LMO4, ZNF827, BBX, CNOT2, RORB, FOXO3, MXI1, CBFB, PNN, GCOM1, MIER1, ZFP90, ZNF302, ZNF397, OLIG2, CCAR1, YY1, ZHX1, MTPAP, MECP2, FOXN2, ARID1A, MED13, FOXN3, ELL2, ASCL1, KDM2A, TRIM33, TCFL5, MGA, ST18, VGLL4, SMARCA4, SUV420H1, TSHZ3, TSHZ1, LITAF, SOX2, TAF9B, MYEF2, SOX9, SOX8, TROVE2, ZNF326, LHX2, VEZF1, TCF4, TCF25, HIP1, KLF6, MAFF, ZMYM2, SMAD9, KLF9, ASXL1, RYBP, ESRRG, …	755	2101	13528	1.21101	1	0.202074	14.6972
GOTERM_BP_FAT	GO:0021779~oligodendrocyte cell fate commitment	3	0.30581	0.00896292	ASCL1, OLIG2, NKX2-2	755	3	13528	17.9179	1	0.202078	14.8229
GOTERM_BP_FAT	GO:0021778~oligodendrocyte cell fate specification	3	0.30581	0.00896292	ASCL1, OLIG2, NKX2-2	755	3	13528	17.9179	1	0.202078	14.8229
GOTERM_BP_FAT	GO:0021529~spinal cord oligodendrocyte cell differentiation	3	0.30581	0.00896292	ASCL1, OLIG2, NKX2-2	755	3	13528	17.9179	1	0.202078	14.8229
GOTERM_BP_FAT	GO:0021530~spinal cord oligodendrocyte cell fate specification	3	0.30581	0.00896292	ASCL1, OLIG2, NKX2-2	755	3	13528	17.9179	1	0.202078	14.8229
GOTERM_BP_FAT	GO:0021780~glial cell fate specification	3	0.30581	0.00896292	ASCL1, OLIG2, NKX2-2	755	3	13528	17.9179	1	0.202078	14.8229
GOTERM_BP_FAT	GO:0045944~positive regulation of transcription from RNA polymerase II promoter	33	3.36391	0.00937411	MEF2C, THRB, SOX2, PAX6, TGFB3, NFKBIA, FOXO3, SOX9, SOX8, TCF7L2, CBFB, ZBTB38, ZNF148, POU3F3, NKX2-2, KLF6, SOX10, SATB2, MYO6, CREB1, TTF1, TEAD1, MED13, STAT3, NRIP1, ASCL1, CSRNP3, HIPK2, ZFPM2, ZNF462, NFIC, NFIB, SMARCA4	755	371	13528	1.59377	1	0.20864	15.4505
GOTERM_BP_FAT	GO:0051170~nuclear import	12	1.22324	0.00953956	XPO1, IPO7, PPP3CB, TGFB3, NFKBIA, SPTBN1, TNPO2, TPR, KPNA2, KPNB1, TNPO1, TOB1	755	88	13528	2.44335	1	0.210225	15.7017
GOTERM_BP_FAT	GO:0008360~regulation of cell shape	9	0.917431	0.00959036	GNA13, PALM2-AKAP2, FYN, ERMN, CDC42SE1, GAS7, RHOU, AKAP2, RASA1, FGD4	755	54	13528	2.98631	1	0.209549	15.7788
GOTERM_BP_FAT	GO:0043549~regulation of kinase activity	32	3.26198	0.00959335	ADCY1, CCK, ADCY2, PTPLAD1, TGFB3, ZEB2, LPAR1, TRIB2, APLP2, MAP3K7, SPRY2, PDPK1, PRKAR2A, KRAS, PAK2, MAP3K2, MAP3K9, GAB1, RAC1, INSR, FGD4, EGFR, FLT1, CDKN1C, SPAG9, P2RX7, MAP4K5, PSEN1, MAPK8IP3, MAP3K13, GAP43, HTR2A	755	357	13528	1.60608	1	0.20796	15.7833
GOTERM_BP_FAT	GO:0046328~regulation of JNK cascade	10	1.01937	0.00959811	MAP3K7, MAP4K5, MAP3K2, PTPLAD1, MAP3K9, HIPK2, GAB1, MAPK8IP3, ZEB2, FGD4	755	65	13528	2.7566	1	0.20643	15.7905
GOTERM_BP_FAT	GO:0021537~telencephalon development	10	1.01937	0.00959811	ASCL1, NDE1, SLC1A2, PSEN1, LHX2, SOX2, RAC1, PAX6, POU3F3, ZEB2	755	65	13528	2.7566	1	0.20643	15.7905
GOTERM_BP_FAT	GO:0010647~positive regulation of cell communication	30	3.0581	0.00983272	LITAF, SLC20A1, ERBB3, TBK1, SOX2, SNCA, TGFB3, TRIM13, ITPKB, ZEB2, LPAR1, MAP3K7, KRAS, MIER1, RAC1, INSR, EGFR, KLK6, FLT1, RICTOR, NCAM1, CDKN1C, NOTCH2, ASCL1, P2RX7, NCOA3, GRIA2, HIPK2, NTRK2, SEMA4C	755	329	13528	1.63385	1	0.209297	16.1453
GOTERM_BP_FAT	GO:0046579~positive regulation of Ras protein signal transduction	5	0.509684	0.0101727	NOTCH2, KRAS, RAC1, ITPKB, LPAR1	755	16	13528	5.59934	1	0.214079	16.6568
GOTERM_BP_FAT	GO:0045859~regulation of protein kinase activity	31	3.16004	0.0104531	ADCY1, CCK, ADCY2, PTPLAD1, TGFB3, ZEB2, LPAR1, TRIB2, APLP2, MAP3K7, SPRY2, PRKAR2A, PDPK1, KRAS, PAK2, MAP3K2, MAP3K9, GAB1, INSR, FGD4, EGFR, FLT1, CDKN1C, SPAG9, P2RX7, MAP4K5, PSEN1, MAPK8IP3, MAP3K13, GAP43, HTR2A	755	345	13528	1.61001	1	0.217654	17.0765
GOTERM_BP_FAT	GO:0030900~forebrain development	17	1.73293	0.0106714	CREB1, SOX2, PAX6, ZEB2, APLP2, ASCL1, NDE1, SLC1A2, PSEN1, FYN, LHX2, RAC1, MAPK8IP3, POU3F3, LRP2, NFIB, SMARCA4	755	152	13528	2.00397	1	0.220022	17.402
GOTERM_BP_FAT	GO:0051494~negative regulation of cytoskeleton organization	9	0.917431	0.0106906	MAPT, MAP1B, SPTBN1, MAP4, RDX, CLASP1, CLASP2, MID1IP1, MAP6D1	755	55	13528	2.93202	1	0.218738	17.4304
GOTERM_BP_FAT	GO:0051173~positive regulation of nitrogen compound metabolic process	51	5.19878	0.0109394	MEF2C, THRB, PDGFA, TGFB3, PAX6, RORB, FOXO3, CBFB, ZBTB38, ZNF148, H2AFX, KDM5A, INSR, EGFR, SOX10, SATB2, MYO6, HSP90AA1, TTF1, ARID1A, MED13, NRIP1, ASCL1, BPTF, NCOA3, HIPK2, ZFPM2, SMARCA4, SOX2, NFKBIA, COMT, SOX9, SOX8, TCF7L2, IGF1R, POU3F3, TNKS, TCF4, NKX2-2, KLF6, SMAD9, CREB1, ESRRG, TEAD1, CREB5, AFF1, STAT3, CSRNP3, ZNF462, NFIC, NFIB	755	644	13528	1.41896	1	0.221603	17.7998
GOTERM_BP_FAT	GO:0050771~negative regulation of axonogenesis	6	0.611621	0.0111104	MAG, PTK2, PSEN1, RUFY3, MBP, SPP1	755	25	13528	4.30029	1	0.22303	18.0527
GOTERM_BP_FAT	GO:0045449~regulation of transcription	171	17.4312	0.0111289	MEF2C, THRB, LMO4, ZNF827, BBX, TGFB3, CNOT2, RORB, FOXO3, MXI1, CBFB, CBX5, PNN, TRAK2, MIER1, ZFP90, ZNF302, ZNF397, OLIG2, INSR, CCAR1, SATB1, PTPRK, SATB2, MYO6, YY1, ZHX1, MECP2, FOXN2, ARID1A, MED13, FOXN3, ELL2, ASCL1, KDM2A, TCFL5, TRIM33, MGA, ST18, VGLL4, SMARCA4, SUV420H1, TSHZ3, TSHZ1, LITAF, SOX2, TAF9B, NFKBIA, ABCA2, SOX9, SOX8, KRAS, ZNF326, LHX2, VEZF1, TCF4, TCF25, NKX2-2, HIP1,…	755	2601	13528	1.17799	1	0.221746	18.0799
GOTERM_BP_FAT	GO:0016477~cell migration	26	2.65036	0.011407	CCK, WASF2, PAX6, ZEB2, CDH2, ITGB1, PTK2, NDE1, CD44, RAC1, POU3F3, CLASP2, PPAP2B, PTPRK, SATB2, FLT1, PLXNB1, ARID5B, ASCL1, TNS3, TNS1, PSEN1, FYN, CNTN2, VCAN, APBB2	755	276	13528	1.68792	1	0.225017	18.4895
GOTERM_BP_FAT	GO:0031334~positive regulation of protein complex assembly	7	0.713558	0.0119281	CCK, GSK3B, MAPT, MAP1B, RAC1, RICTOR, TERF1	755	35	13528	3.58358	1	0.232396	19.2518
GOTERM_BP_FAT	GO:0051130~positive regulation of cellular component organization	19	1.9368	0.0123299	CCK, ACTN4, PLXNB1, MAP1B, SNCA, TGFB3, RICTOR, MIB1, P2RX7, PDPK1, GSK3B, MAPT, RAC1, TNKS, SEMA4D, INSR, PIK3R1, TERF1, HIP1	755	181	13528	1.88088	1	0.237579	19.8349
GOTERM_BP_FAT	GO:0000059~protein import into nucleus, docking	5	0.509684	0.0127266	XPO1, IPO7, TNPO2, KPNB1, TNPO1	755	17	13528	5.26996	1	0.242565	20.4067
GOTERM_BP_FAT	GO:0051057~positive regulation of small GTPase mediated signal transduction	5	0.509684	0.0127266	NOTCH2, KRAS, RAC1, ITPKB, LPAR1	755	17	13528	5.26996	1	0.242565	20.4067
GOTERM_BP_FAT	GO:0021543~pallium development	8	0.815494	0.0130172	ASCL1, NDE1, PSEN1, SOX2, RAC1, PAX6, POU3F3, ZEB2	755	46	13528	3.11615	1	0.245701	20.8232
GOTERM_BP_FAT	GO:0046578~regulation of Ras protein signal transduction	21	2.14067	0.0135395	RALBP1, PREX1, PSD3, RABGAP1L, ASAP1, ITPKB, CDH2, RICTOR, LPAR1, ARFGEF2, ARHGEF10, MCF2L, ADAP1, NOTCH2, KRAS, SOS2, RAC1, TBC1D5, AGAP1, FGD4, KALRN	755	210	13528	1.79179	1	0.252533	21.5666
GOTERM_BP_FAT	GO:0007265~Ras protein signal transduction	13	1.32518	0.013812	GNA13, PLD1, ARHGAP5, KRAS, RASGRP3, PTPLAD1, WASF2, RTKN, SHC3, TAX1BP3, KSR1, RHOU, RALGDS	755	105	13528	2.2184	1	0.255217	21.9517
GOTERM_BP_FAT	GO:0034504~protein localization in nucleus	12	1.22324	0.0152573	XPO1, IPO7, PPP3CB, TGFB3, NFKBIA, SPTBN1, TNPO2, TPR, KPNA2, KPNB1, TNPO1, TOB1	755	94	13528	2.28739	1	0.276192	23.9651
GOTERM_BP_FAT	GO:0008286~insulin receptor signaling pathway	7	0.713558	0.0155537	PHIP, IGF1R, IRS2, GAB1, SOCS7, INSR, PIK3R1	755	37	13528	3.38987	1	0.278946	24.3719
GOTERM_BP_FAT	GO:0015669~gas transport	5	0.509684	0.0156556	IPCEF1, HBA2, CA2, NGB, HBA1, AQP1	755	18	13528	4.97719	1	0.278705	24.5113
GOTERM_BP_FAT	GO:0035116~embryonic hindlimb morphogenesis	5	0.509684	0.0156556	CHD7, DICER1, GNAS, ZBTB16, SMARCA4	755	18	13528	4.97719	1	0.278705	24.5113
GOTERM_BP_FAT	GO:0007254~JNK cascade	9	0.917431	0.0160386	MAP4K5, MAP3K2, PTPLAD1, MAP3K9, RB1CC1, GAB1, MAPK8IP3, MAP3K13, FGD4	755	59	13528	2.73324	1	0.28269	25.033
GOTERM_BP_FAT	GO:0006836~neurotransmitter transport	11	1.1213	0.0167259	SLC17A7, RAB3A, STX1A, P2RX7, SLC17A6, PSEN1, SLC6A8, RAB14, SV2B, ATP1A2, CACNA1A	755	83	13528	2.37466	1	0.291085	25.9607
GOTERM_BP_FAT	GO:0007423~sensory organ development	22	2.24261	0.0171587	EGFR, TSHZ1, MYO6, ERBB3, CRYAB, PDGFA, YY1, SOX2, TGFB3, PAX6, SOBP, RORB, COL5A2, STAT3, DDR1, ASCL1, ATP2B2, SPRY2, CHD7, SP3, NTRK2, CUX1	755	229	13528	1.72137	1	0.295582	26.5392
GOTERM_BP_FAT	GO:0008104~protein localization	65	6.62589	0.0172033	XPO1, COPA, ZMAT3, PAX6, TGFB3, MXI1, KIF13A, VPS13C, TRAK2, ANK3, VPS13A, TPR, AGAP1, KPNB1, KIF13B, EGFR, PTPRK, STX1A, MYO6, ACTN4, GRIN2A, STXBP3, RAB11FIP2, RAB11FIP3, ATG4C, PSEN1, STXBP5, IPO7, RAB14, SORT1, GNAS, SRP72, KPNA2, RAB3A, SNX9, NFKBIA, RDX, AKAP10, RFFL, CHMP2B, MACF1, STX16, PPP3CB, TNKS, SNAP23, TNPO2, TNPO1, TNPO3, SYS1, SNX27, NASP, MAL, RAB31, RAB30, ERBB2IP, CADPS2, GRIA…	755	882	13528	1.32048	1	0.294409	26.5986
GOTERM_BP_FAT	GO:0031345~negative regulation of cell projection organization	6	0.611621	0.0179153	MAG, PTK2, PSEN1, RUFY3, MBP, SPP1	755	28	13528	3.83955	1	0.302764	27.5405
GOTERM_BP_FAT	GO:0007163~establishment or maintenance of cell polarity	8	0.815494	0.0181044	IGF1R, NDE1, MACF1, ERBB2IP, CLASP1, MAP7, CLASP2, DLG1	755	49	13528	2.92537	1	0.3036	27.7886
GOTERM_BP_FAT	GO:0007015~actin filament organization	10	1.01937	0.0181349	RND1, PAK2, ACTN4, PREX1, ERMN, RAC1, WIPF1, GAS7, PLS3, DLG1	755	72	13528	2.48859	1	0.302211	27.8286
GOTERM_BP_FAT	GO:0030001~metal ion transport	38	3.8736	0.0186234	SLC5A3, KCNJ16, TF, SCN1A, ATP1B1, SLC38A2, SLC20A1, CAMK2G, TRIM13, KCNJ10, KCNJ2, KCNJ3, ATP2B2, KCNS1, PPP3CB, SLC4A8, SLC31A2, TRPM3, SGK1, SLC12A2, KCNB1, GRIN2A, ATP1A2, KCTD6, SLC17A7, P2RX7, SLC17A6, KCNJ6, KCNJ9, FYN, SLC6A8, SLC25A37, SCN8A, SLC38A1, SLC5A11, CACNA1A, TRAPPC10, KCTD12	755	465	13528	1.46426	1	0.307178	28.4657
GOTERM_BP_FAT	GO:0008154~actin polymerization or depolymerization	5	0.509684	0.0189753	PAK2, PREX1, RAC1, WIPF1, GAS7	755	19	13528	4.71523	1	0.310186	28.9215
GOTERM_BP_FAT	GO:0051966~regulation of synaptic transmission, glutamatergic	5	0.509684	0.0189753	EGFR, PSEN1, GRIA2, NTRK2, HTR2A	755	19	13528	4.71523	1	0.310186	28.9215
GOTERM_BP_FAT	GO:0042325~regulation of phosphorylation	38	3.8736	0.0192989	ADCY1, CCK, ADCY2, PDGFA, PTPLAD1, TGFB3, ZEB2, LPAR1, APLP2, TRIB2, MAP3K7, SPRY2, PDPK1, PRKAR2A, KRAS, MCM7, PAK2, MAP3K2, MAP3K9, RB1CC1, GAB1, RAC1, INSR, PPP1R14A, FGD4, EGFR, FLT1, RICTOR, PRKCE, CDKN1C, SPAG9, MAP4K5, P2RX7, PSEN1, MAPK8IP3, MAP3K13, GAP43, HTR2A	755	466	13528	1.46111	1	0.312757	29.3381
GOTERM_BP_FAT	GO:0018105~peptidyl-serine phosphorylation	6	0.611621	0.0206825	TTBK2, SBK1, GSK3B, TNKS, CLK1, UHMK1	755	29	13528	3.70715	1	0.329295	31.0937
GOTERM_BP_FAT	GO:0045935~positive regulation of nucleobase, nucleoside, nucleotide and nucleic acid metabolic process	48	4.89297	0.0217073	MEF2C, THRB, PDGFA, SOX2, PAX6, TGFB3, NFKBIA, RORB, FOXO3, SOX9, TCF7L2, SOX8, CBFB, ZBTB38, IGF1R, ZNF148, POU3F3, TNKS, H2AFX, TCF4, KDM5A, INSR, NKX2-2, KLF6, SOX10, SATB2, MYO6, SMAD9, CREB1, ESRRG, TEAD1, TTF1, ARID1A, CREB5, MED13, AFF1, STAT3, NRIP1, ASCL1, NCOA3, CSRNP3, BPTF, HIPK2, ZFPM2, ZNF462, NFIC, NFIB, SMARCA4	755	624	13528	1.3783	1	0.340666	32.3674
GOTERM_BP_FAT	GO:0048598~embryonic morphogenesis	27	2.75229	0.0220446	TSHZ1, LMO4, DICER1, SOX2, TGFB3, SOBP, ZEB2, ZBTB16, GREM1, TCF7L2, ZIC2, MAP3K7, ATP2B2, SPRY2, CHD7, MACF1, FBXW4, PPAP2B, SATB2, MYO6, SHANK3, MIB1, NOTCH2, PSEN1, SP3, GNAS, SMARCA4	755	307	13528	1.57584	1	0.343052	32.7817
GOTERM_BP_FAT	GO:0032940~secretion by cell	20	2.03874	0.0224231	RAB3A, STX1A, MYO6, SRCIN1, CAMK2G, STXBP3, ARFGEF2, PEX5L, P2RX7, PSEN1, CADPS2, STXBP5, NTRK2, RAB14, GNAS, VAMP3, SYTL2, LRP2, PCSK6, CACNA1A	755	207	13528	1.7312	1	0.345915	33.2437
GOTERM_BP_FAT	GO:0046907~intracellular transport	50	5.09684	0.0229176	XPO1, COPA, ENAH, WASF2, TGFB3, NDE1, TRAK2, VPS13A, TPR, KPNB1, KIF13B, PABPN1, STX1A, MYO6, HSP90AA1, KIF5B, NUDT4, NPC1, ATG4C, PSEN1, IPO7, NUDT4P1, RAB14, SORT1, SLC25A37, GNAS, VAMP2, SRP72, CUX1, KPNA2, SNX9, NFKBIA, RFFL, SET, MACF1, KLC1, STX16, PPP3CB, SNAP23, WIPF1, TNPO2, TNPO1, RHOBTB3, ERBB2IP, TOM1L2, GSK3B, SPTBN1, SYTL2, GOSR1, LRP2, TOB1	755	657	13528	1.36361	1	0.350166	33.8429
GOTERM_BP_FAT	GO:0044057~regulation of system process	27	2.75229	0.0237438	RAB3A, TF, CCK, GNAI3, THRB, SNCA, CDH2, PXK, TPM3, ATP2B2, KRAS, PPP3CB, EGFR, STX1A, FLT1, MYO6, MAP1B, GRIN2A, ATP1A2, GRM3, PSEN1, GRIA2, CHRM3, NTRK2, CELF2, CACNA1A, HTR2A	755	309	13528	1.56564	1	0.358373	34.8328
GOTERM_BP_FAT	GO:0009967~positive regulation of signal transduction	26	2.65036	0.0242597	LITAF, SLC20A1, ERBB3, TBK1, SOX2, TGFB3, TRIM13, ITPKB, ZEB2, LPAR1, MAP3K7, KRAS, MIER1, RAC1, INSR, KLK6, FLT1, RICTOR, CDKN1C, NCAM1, ASCL1, NOTCH2, P2RX7, NCOA3, HIPK2, SEMA4C	755	295	13528	1.5792	1	0.362668	35.4437
GOTERM_BP_FAT	GO:0032268~regulation of cellular protein metabolic process	38	3.8736	0.024393	CCK, PDGFA, PTPLAD1, SNCA, MKNK2, EIF5B, TGFB3, NFKBIA, MKNK1, ZEB2, CPEB1, PAIP2B, ZFP36L1, PRKAR2A, SET, TNRC6C, MAP3K2, MAP3K9, RB1CC1, GAB1, QKI, TNRC6B, TNRC6A, INSR, BUB3, SAMD4A, DNAJC1, FGD4, HHATL, EGFR, ANAPC5, RICTOR, PRKCE, EIF4G3, MAP4K5, P2RX7, PSEN1, MAPK8IP3	755	474	13528	1.43645	1	0.362341	35.6007
GOTERM_BP_FAT	GO:0035239~tube morphogenesis	14	1.42712	0.0247189	GNA13, MAP3K7, MIB1, SPRY2, FLT1, PSEN1, CD44, PGF, LMO4, DICER1, ZEB2, GREM1, SHANK3, ZIC2	755	127	13528	1.9752	1	0.364293	35.983
GOTERM_BP_FAT	GO:0021700~developmental maturation	12	1.22324	0.0248117	CDKN1C, RAB3A, SOX10, PLP1, RND1, PSEN1, CD44, MAP1B, FOXO3, SOX8, CACNA1A, CBFB	755	101	13528	2.12886	1	0.363486	36.0915
GOTERM_BP_FAT	GO:0001570~vasculogenesis	7	0.713558	0.0249538	ZFP36L1, PTK2, NTRK2, QKI, ZFPM2, RASA1, SMARCA4	755	41	13528	3.05915	1	0.363263	36.2572
GOTERM_BP_FAT	GO:0008105~asymmetric protein localization	4	0.407747	0.0259963	ERBB2IP, RAB14, RDX, MAL	755	12	13528	5.97263	1	0.373404	37.4608
GOTERM_BP_FAT	GO:0006887~exocytosis	13	1.32518	0.0264747	RAB3A, STX1A, P2RX7, PSEN1, SRCIN1, CADPS2, STXBP5, SYTL2, STXBP3, VAMP3, ARFGEF2, PEX5L, CACNA1A	755	115	13528	2.0255	1	0.376931	38.0059
GOTERM_BP_FAT	GO:0030334~regulation of cell migration	17	1.73293	0.0266369	EGFR, GNA13, PTPRK, PLD1, IRS2, FLT1, ENPP2, PDGFA, PAX6, GREM1, SPAG9, IGF1R, ARHGAP5, GAB1, RAC1, INSR, PIK3R1	755	169	13528	1.80239	1	0.376861	38.1897
GOTERM_BP_FAT	GO:0046928~regulation of neurotransmitter secretion	5	0.509684	0.0268358	RAB3A, STX1A, SNCA, NTRK2, CACNA1A	755	21	13528	4.26616	1	0.3772	38.4144
GOTERM_BP_FAT	GO:0045444~fat cell differentiation	8	0.815494	0.0268625	ALDH6A1, CTBP2, GSK3B, RUNX1T1, SOCS7, AACS, INSR, TCF7L2	755	53	13528	2.70459	1	0.375628	38.4446
GOTERM_BP_FAT	GO:0033189~response to vitamin A	7	0.713558	0.0277882	CD44, TFRC, PDGFA, FADS1, SOX2, MAP1B, LRP2	755	42	13528	2.98631	1	0.383936	39.4797
GOTERM_BP_FAT	GO:0043523~regulation of neuron apoptosis	11	1.1213	0.0278738	SPPL3, KRAS, PSEN1, ERBB3, HIPK2, SNCA, TGFB3, NR3C1, PCSK6, RASA1, CACNA1A	755	90	13528	2.18996	1	0.382997	39.5745
GOTERM_BP_FAT	GO:0051329~interphase of mitotic cell cycle	12	1.22324	0.0282016	KHDRBS1, EGFR, CDKN1C, ANAPC5, CAMK2G, CDK2AP1, PPP3CB, KPNA2, RHOU, ITGB1, FOXN3, TERF1	755	103	13528	2.08752	1	0.384676	39.9366
GOTERM_BP_FAT	GO:0009719~response to endogenous stimulus	33	3.36391	0.0292352	ADCY1, ADCY2, PGF, PDGFA, ERBB3, TGFB3, ABCA2, AQP1, PHIP, IGF1R, PDPK1, SLC1A2, PRKAR2A, KRAS, GAB1, INSR, PIK3R1, SPP1, TXNIP, PLD1, IRS2, CRYAB, FADS1, MAP1B, GRIN2A, ADIPOR2, SOCS7, STAT3, SLC25A36, SORT1, GNAS, CA2, AACS	755	405	13528	1.45998	1	0.39381	41.0648
GOTERM_BP_FAT	GO:0032535~regulation of cellular component size	24	2.44648	0.0293343	FGFR2, CRYAB, CREB1, MAP1B, TAF9B, ADIPOR2, TGFB3, RDX, RICTOR, GREM1, ATP2B2, NOTCH2, ARHGAP5, ERBB2IP, RB1CC1, MAPT, WHSC1L1, RAC1, TMEM123, SPTBN1, APBB2, CACNA1A, RASA1, SPP1	755	271	13528	1.58682	1	0.392985	41.1719
GOTERM_BP_FAT	GO:0033273~response to vitamin	9	0.917431	0.0296444	CD44, TFRC, PDGFA, FADS1, SOX2, MAP1B, LRP2, INSR, SPP1	755	66	13528	2.44335	1	0.394369	41.506
GOTERM_BP_FAT	GO:0007155~cell adhesion	52	5.30071	0.0297251	MTSS1, MEGF10, PNN, CD47, PDPK1, ARHGAP5, CD44, CNTNAP2, DLG1, EGFR, PTPRK, NRXN2, PCDH9, STXBP3, NRXN1, CERCAM, CTNNA3, NCAM1, DDR1, PSEN1, LSAMP, CNTN2, VCAN, SEMA4D, EPDR1, CLDN11, NEO1, CDH2, SOX9, ITGB1, CD9, COL27A1, TNR, RAC1, COL6A1, THBS2, SPP1, FLRT2, MAG, HAPLN4, LPP, CNKSR3, PPFIBP1, NFASC, PCDH17, COL5A3, RAPH1, ERBB2IP, PKP4, CDH19, CDH10, NTM	755	700	13528	1.33104	1	0.393361	41.5926
GOTERM_BP_FAT	GO:0031328~positive regulation of cellular biosynthetic process	51	5.19878	0.0305614	MEF2C, THRB, PDGFA, TGFB3, PAX6, RORB, FOXO3, CBFB, ZBTB38, ZNF148, KDM5A, INSR, SAMD4A, EGFR, SOX10, IRS2, SATB2, MYO6, HSP90AA1, TTF1, ARID1A, MED13, NRIP1, ASCL1, BPTF, NCOA3, HIPK2, ZFPM2, SMARCA4, SOX2, NFKBIA, SOX9, SOX8, TCF7L2, IGF1R, POU3F3, TNKS, TCF4, NKX2-2, KLF6, SMAD9, CREB1, ESRRG, TEAD1, CREB5, AFF1, STAT3, CSRNP3, ZNF462, NFIC, NFIB	755	685	13528	1.33403	1	0.400109	42.4832
GOTERM_BP_FAT	GO:0048863~stem cell differentiation	6	0.611621	0.0306015	SOX10, NOTCH2, DICER1, SOX2, MSI2, TCF7L2	755	32	13528	3.3596	1	0.398678	42.5256
GOTERM_BP_FAT	GO:0060021~palate development	6	0.611621	0.0306015	SATB2, TSHZ1, CHD7, ARID5B, TGFB3, PLEKHA1	755	32	13528	3.3596	1	0.398678	42.5256
GOTERM_BP_FAT	GO:0022610~biological adhesion	52	5.30071	0.0306386	MTSS1, MEGF10, PNN, CD47, PDPK1, ARHGAP5, CD44, CNTNAP2, DLG1, EGFR, PTPRK, NRXN2, PCDH9, STXBP3, NRXN1, CERCAM, CTNNA3, NCAM1, DDR1, PSEN1, LSAMP, CNTN2, VCAN, SEMA4D, EPDR1, CLDN11, NEO1, CDH2, SOX9, ITGB1, CD9, COL27A1, TNR, RAC1, COL6A1, THBS2, SPP1, FLRT2, MAG, HAPLN4, LPP, CNKSR3, PPFIBP1, NFASC, PCDH17, COL5A3, RAPH1, ERBB2IP, PKP4, CDH19, CDH10, NTM	755	701	13528	1.32914	1	0.39723	42.5648
GOTERM_BP_FAT	GO:0010557~positive regulation of macromolecule biosynthetic process	49	4.9949	0.0311283	MEF2C, THRB, PDGFA, SOX2, PAX6, TGFB3, NFKBIA, RORB, FOXO3, SOX9, TCF7L2, SOX8, CBFB, ZBTB38, IGF1R, ZNF148, POU3F3, TNKS, TCF4, KDM5A, INSR, NKX2-2, SAMD4A, KLF6, SOX10, SATB2, IRS2, MYO6, SMAD9, CREB1, ESRRG, TEAD1, TTF1, ARID1A, CREB5, MED13, AFF1, STAT3, NRIP1, ASCL1, NCOA3, CSRNP3, BPTF, HIPK2, ZFPM2, ZNF462, NFIC, NFIB, SMARCA4	755	654	13528	1.34247	1	0.400342	43.0796
GOTERM_BP_FAT	GO:0006633~fatty acid biosynthetic process	10	1.01937	0.0311828	ELOVL1, PLP1, ELOVL5, FA2H, FADS1, SCD, FASN, QKI, ELOVL7, ACSL3	755	79	13528	2.26809	1	0.399079	43.1367
GOTERM_BP_FAT	GO:0007628~adult walking behavior	5	0.509684	0.0313944	EPHA4, SCN1A, CHD7, HIPK2, CACNA1A	755	22	13528	4.07225	1	0.399387	43.3576
GOTERM_BP_FAT	GO:0048286~lung alveolus development	5	0.509684	0.0313944	MAN2A1, TNS3, PDGFA, TGFB3, MAPK8IP3	755	22	13528	4.07225	1	0.399387	43.3576
GOTERM_BP_FAT	GO:0010828~positive regulation of glucose transport	5	0.509684	0.0313944	SLC1A2, IRS2, ERBB3, INSR, PIK3R1	755	22	13528	4.07225	1	0.399387	43.3576
GOTERM_BP_FAT	GO:0046326~positive regulation of glucose import	5	0.509684	0.0313944	SLC1A2, IRS2, ERBB3, INSR, PIK3R1	755	22	13528	4.07225	1	0.399387	43.3576
GOTERM_BP_FAT	GO:0006605~protein targeting	20	2.03874	0.0315961	XPO1, MYO6, TGFB3, NFKBIA, MACF1, TRAK2, ATG4C, ERBB2IP, IPO7, GSK3B, PPP3CB, SPTBN1, SRP72, TNPO2, TPR, KPNA2, TNPO1, KPNB1, TOB1, KIF13B	755	215	13528	1.66678	1	0.399594	43.5674
GOTERM_BP_FAT	GO:0060562~epithelial tube morphogenesis	9	0.917431	0.0320861	MAP3K7, MIB1, CD44, PGF, LMO4, ZEB2, GREM1, SHANK3, ZIC2	755	67	13528	2.40688	1	0.402617	44.074
GOTERM_BP_FAT	GO:0015672~monovalent inorganic cation transport	27	2.75229	0.0322997	SLC5A3, KCNJ16, ATP1B1, SGK1, SCN1A, SLC38A2, SLC20A1, SLC12A2, KCNB1, TRIM13, KCNJ10, ATP1A2, KCNJ2, KCNJ3, KCTD6, SLC17A7, KCNS1, KCNJ6, SLC17A6, KCNJ9, SLC6A8, SLC4A8, SCN8A, SLC38A1, SLC5A11, TRAPPC10, KCTD12	755	318	13528	1.52133	1	0.402919	44.2936
GOTERM_BP_FAT	GO:0006325~chromatin organization	31	3.16004	0.0323022	BMI1, EZH1, SOX2, ARID4B, NAP1L1, NR3C1, CBX5, CHD9, SET, CHD7, H2AFX, TLK2, KDM5A, CHD5, TERF1, SATB1, SATB2, EHMT1, NASP, TTF1, ARID1A, BPTF, KDM2A, PHF1, WHSC1L1, ASH1L, KDM4B, JMJD1C, MPHOSPH8, SMARCA4, SUV420H1	755	378	13528	1.46946	1	0.401181	44.2961
GOTERM_BP_FAT	GO:0050974~detection of mechanical stimulus involved in sensory perception	4	0.407747	0.0324252	ATP2B2, SLC12A2, FYN, SOX2	755	13	13528	5.51319	1	0.400618	44.4222
GOTERM_BP_FAT	GO:0045596~negative regulation of cell differentiation	20	2.03874	0.0329147	MAG, DICER1, SOX2, PAX6, NFKBIA, ZBTB16, SOX9, TCF7L2, ITGB1, TTC3, RUFY3, MBP, NOTCH2, MIB1, PTK2, PSEN1, NKX2-2, TOB2, SPP1, TOB1	755	216	13528	1.65906	1	0.40356	44.9211
GOTERM_BP_FAT	GO:0033365~protein localization in organelle	15	1.52905	0.0332451	XPO1, TGFB3, PAX6, NFKBIA, MACF1, IPO7, PPP3CB, SPTBN1, SRP72, TNPO2, TPR, KPNA2, KPNB1, TNPO1, TOB1	755	146	13528	1.84088	1	0.404956	45.2554
GOTERM_BP_FAT	GO:0019220~regulation of phosphate metabolic process	38	3.8736	0.0334629	ADCY1, CCK, ADCY2, PDGFA, PTPLAD1, TGFB3, ZEB2, LPAR1, APLP2, TRIB2, MAP3K7, SPRY2, PDPK1, PRKAR2A, KRAS, MCM7, PAK2, MAP3K2, MAP3K9, RB1CC1, GAB1, RAC1, INSR, PPP1R14A, FGD4, EGFR, FLT1, RICTOR, PRKCE, CDKN1C, SPAG9, MAP4K5, P2RX7, PSEN1, MAPK8IP3, MAP3K13, GAP43, HTR2A	755	485	13528	1.40388	1	0.405278	45.4748
GOTERM_BP_FAT	GO:0051174~regulation of phosphorus metabolic process	38	3.8736	0.0334629	ADCY1, CCK, ADCY2, PDGFA, PTPLAD1, TGFB3, ZEB2, LPAR1, APLP2, TRIB2, MAP3K7, SPRY2, PDPK1, PRKAR2A, KRAS, MCM7, PAK2, MAP3K2, MAP3K9, RB1CC1, GAB1, RAC1, INSR, PPP1R14A, FGD4, EGFR, FLT1, RICTOR, PRKCE, CDKN1C, SPAG9, MAP4K5, P2RX7, PSEN1, MAPK8IP3, MAP3K13, GAP43, HTR2A	755	485	13528	1.40388	1	0.405278	45.4748
GOTERM_BP_FAT	GO:0051325~interphase	12	1.22324	0.0338919	KHDRBS1, EGFR, CDKN1C, ANAPC5, CAMK2G, CDK2AP1, PPP3CB, KPNA2, RHOU, ITGB1, FOXN3, TERF1	755	106	13528	2.02844	1	0.407565	45.9044
GOTERM_BP_FAT	GO:0045941~positive regulation of transcription	43	4.38328	0.0341913	MEF2C, THRB, SOX2, PAX6, TGFB3, NFKBIA, RORB, FOXO3, SOX9, TCF7L2, SOX8, CBFB, ZBTB38, ZNF148, POU3F3, TCF4, KDM5A, NKX2-2, KLF6, SOX10, SATB2, MYO6, SMAD9, CREB1, ESRRG, TEAD1, TTF1, ARID1A, CREB5, MED13, AFF1, STAT3, NRIP1, ASCL1, NCOA3, CSRNP3, BPTF, HIPK2, ZFPM2, ZNF462, NFIC, NFIB, SMARCA4	755	564	13528	1.36608	1	0.408624	46.2025
GOTERM_BP_FAT	GO:0048489~synaptic vesicle transport	6	0.611621	0.0344692	RAB3A, STX1A, P2RX7, PSEN1, SNCA, BIN1	755	33	13528	3.2578	1	0.409472	46.4776
GOTERM_BP_FAT	GO:0021987~cerebral cortex development	6	0.611621	0.0344692	ASCL1, NDE1, PSEN1, SOX2, RAC1, POU3F3	755	33	13528	3.2578	1	0.409472	46.4776
GOTERM_BP_FAT	GO:0032869~cellular response to insulin stimulus	9	0.917431	0.0346615	PHIP, IGF1R, PDPK1, IRS2, ERBB3, GAB1, SOCS7, INSR, PIK3R1	755	68	13528	2.37148	1	0.409528	46.6672
GOTERM_BP_FAT	GO:0034613~cellular protein localization	33	3.36391	0.034835	XPO1, COPA, SNX9, PAX6, TGFB3, NFKBIA, RFFL, MACF1, TRAK2, STX16, PPP3CB, TNKS, TPR, TNPO2, TNPO1, KPNB1, KIF13B, EGFR, PTPRK, STX1A, MYO6, ERBB2IP, ATG4C, TOM1L2, IPO7, GSK3B, SORT1, SPTBN1, SYTL2, SRP72, GOSR1, KPNA2, TOB1	755	411	13528	1.43866	1	0.409414	46.8378
GOTERM_BP_FAT	GO:0009612~response to mechanical stimulus	8	0.815494	0.0350667	TXNIP, ATP2B2, P2RX7, SLC12A2, FYN, SOX2, MAP1B, STRBP	755	56	13528	2.5597	1	0.409828	47.0648
GOTERM_BP_FAT	GO:0051789~response to protein stimulus	12	1.22324	0.0359569	HSP90AA1, MAP1B, HSPA1A, EDEM3, HSPA1B, NR3C1, TTC3, HSPA1L, DDR1, P2RX7, HSPA2, ID2, INSR	755	107	13528	2.00948	1	0.416124	47.9282
GOTERM_BP_FAT	GO:0009725~response to hormone stimulus	30	3.0581	0.0365201	TXNIP, IRS2, ADCY1, PLD1, ADCY2, PGF, PDGFA, CRYAB, ERBB3, FADS1, MAP1B, ADIPOR2, TGFB3, SOCS7, ABCA2, AQP1, STAT3, PHIP, IGF1R, PDPK1, PRKAR2A, KRAS, SLC25A36, GAB1, SORT1, GNAS, CA2, INSR, PIK3R1, SPP1	755	367	13528	1.46468	1	0.419422	48.4677
GOTERM_BP_FAT	GO:0051674~localization of cell	26	2.65036	0.0367429	CCK, WASF2, PAX6, ZEB2, CDH2, ITGB1, PTK2, NDE1, CD44, RAC1, POU3F3, CLASP2, PPAP2B, PTPRK, SATB2, FLT1, PLXNB1, ARID5B, ASCL1, TNS3, TNS1, PSEN1, FYN, CNTN2, VCAN, APBB2	755	307	13528	1.51748	1	0.419695	48.6797
GOTERM_BP_FAT	GO:0048870~cell motility	26	2.65036	0.0367429	CCK, WASF2, PAX6, ZEB2, CDH2, ITGB1, PTK2, NDE1, CD44, RAC1, POU3F3, CLASP2, PPAP2B, PTPRK, SATB2, FLT1, PLXNB1, ARID5B, ASCL1, TNS3, TNS1, PSEN1, FYN, CNTN2, VCAN, APBB2	755	307	13528	1.51748	1	0.419695	48.6797
GOTERM_BP_FAT	GO:0060341~regulation of cellular localization	22	2.24261	0.0368928	KHDRBS1, RAB3A, STX1A, NUDT4, CRYAB, CREB1, SNCA, TGFB3, NFKBIA, STXBP3, ABCA2, MXI1, TCF7L2, UHMK1, P2RX7, CHD7, GSK3B, NTRK2, NUDT4P1, AACS, DNAJC1, CACNA1A, HTR2A	755	248	13528	1.58949	1	0.419329	48.8218
GOTERM_BP_FAT	GO:0070727~cellular macromolecule localization	33	3.36391	0.0379421	XPO1, COPA, SNX9, PAX6, TGFB3, NFKBIA, RFFL, MACF1, TRAK2, STX16, PPP3CB, TNKS, TPR, TNPO2, TNPO1, KPNB1, KIF13B, EGFR, PTPRK, STX1A, MYO6, ERBB2IP, ATG4C, TOM1L2, IPO7, GSK3B, SORT1, SPTBN1, SYTL2, SRP72, GOSR1, KPNA2, TOB1	755	414	13528	1.42824	1	0.426725	49.8063
GOTERM_BP_FAT	GO:0009891~positive regulation of biosynthetic process	51	5.19878	0.0380681	MEF2C, THRB, PDGFA, TGFB3, PAX6, RORB, FOXO3, CBFB, ZBTB38, ZNF148, KDM5A, INSR, SAMD4A, EGFR, SOX10, IRS2, SATB2, MYO6, HSP90AA1, TTF1, ARID1A, MED13, NRIP1, ASCL1, BPTF, NCOA3, HIPK2, ZFPM2, SMARCA4, SOX2, NFKBIA, SOX9, SOX8, TCF7L2, IGF1R, POU3F3, TNKS, TCF4, NKX2-2, KLF6, SMAD9, CREB1, ESRRG, TEAD1, CREB5, AFF1, STAT3, CSRNP3, ZNF462, NFIC, NFIB	755	695	13528	1.31484	1	0.42613	49.9234
GOTERM_BP_FAT	GO:0010627~regulation of protein kinase cascade	22	2.24261	0.0382733	SLC20A1, LITAF, ERBB3, TBK1, PTPLAD1, TRIM13, ZEB2, RICTOR, LPAR1, MAP3K7, P2RX7, MAP4K5, MIER1, MAP3K2, MAP3K9, HIPK2, GAB1, OTUD7B, SEMA4C, MAPK8IP3, INSR, FGD4	755	249	13528	1.58311	1	0.426212	50.1133
GOTERM_BP_FAT	GO:0043583~ear development	11	1.1213	0.0385411	DDR1, ATP2B2, SPRY2, TSHZ1, CHD7, MYO6, PDGFA, SOX2, TGFB3, SOBP, CUX1	755	95	13528	2.0747	1	0.426823	50.3603
GOTERM_BP_FAT	GO:0009991~response to extracellular stimulus	20	2.03874	0.0386	CCK, ATG12, PDGFA, FADS1, SOX2, MAP1B, ADIPOR2, ENSA, P2RX7, SLC1A2, ACSL1, PSEN1, ATG4C, TFRC, CD44, LRP2, AACS, INSR, TNRC6A, SPP1	755	220	13528	1.6289	1	0.425672	50.4144
GOTERM_BP_FAT	GO:0000060~protein import into nucleus, translocation	6	0.611621	0.0386261	TGFB3, NFKBIA, SPTBN1, KPNB1, TNPO1, TOB1	755	34	13528	3.16198	1	0.424256	50.4385
GOTERM_BP_FAT	GO:0007269~neurotransmitter secretion	6	0.611621	0.0386261	RAB3A, STX1A, P2RX7, PSEN1, RAB14, CACNA1A	755	34	13528	3.16198	1	0.424256	50.4385
GOTERM_BP_FAT	GO:0043062~extracellular structure organization	16	1.63099	0.0386418	MYO6, LGALS3, MAP1B, NFASC, NRXN1, CDH2, COL5A3, COL5A2, APLP2, ATP2B2, PTK2, ANK3, TNR, APBB2, CACNA1A, SMARCA4	755	163	13528	1.75881	1	0.422764	50.4529
GOTERM_BP_FAT	GO:0043066~negative regulation of apoptosis	29	2.95617	0.0390555	MEF2C, ERBB3, SNCA, TAF9B, TGFB3, NFKBIA, HSPA1A, HSPA1B, TCF7L2, MAP3K7, IGF1R, KRAS, RB1CC1, PIK3CA, POU3F3, PCSK6, RASA1, EGFR, CRYAB, TMBIM6, PIM3, NOTCH2, PSEN1, GSK3B, HIPK2, BNIP3L, SORT1, SEMA4D, APBB2, CACNA1A	755	354	13528	1.46785	1	0.424598	50.8315
GOTERM_BP_FAT	GO:0008361~regulation of cell size	19	1.9368	0.0392671	FGFR2, CRYAB, CREB1, MAP1B, TAF9B, ADIPOR2, TGFB3, GREM1, ATP2B2, NOTCH2, ARHGAP5, ERBB2IP, RB1CC1, MAPT, WHSC1L1, TMEM123, APBB2, CACNA1A, SPP1	755	206	13528	1.65262	1	0.42474	51.024
GOTERM_BP_FAT	GO:0040012~regulation of locomotion	18	1.83486	0.0398201	EGFR, GNA13, PTPRK, PLD1, IRS2, FLT1, ENPP2, PDGFA, SNCA, PAX6, GREM1, SPAG9, IGF1R, ARHGAP5, GAB1, RAC1, INSR, PIK3R1	755	192	13528	1.6798	1	0.427683	51.524
GOTERM_BP_FAT	GO:0051270~regulation of cell motion	18	1.83486	0.0415054	EGFR, GNA13, PTPRK, PLD1, IRS2, FLT1, ACTN4, ENPP2, PDGFA, PAX6, GREM1, SPAG9, IGF1R, ARHGAP5, GAB1, RAC1, INSR, PIK3R1	755	193	13528	1.6711	1	0.439697	53.0179
GOTERM_BP_FAT	GO:0032386~regulation of intracellular transport	9	0.917431	0.0432159	KHDRBS1, NUDT4, CRYAB, GSK3B, NUDT4P1, TGFB3, NFKBIA, ABCA2, MXI1, UHMK1	755	71	13528	2.27128	1	0.451563	54.4899
GOTERM_BP_FAT	GO:0007611~learning or memory	12	1.22324	0.0450994	ADCY1, KRAS, PSEN1, S100B, FYN, GRIN2A, PTN, ATP1A2, COMT, SHC3, IL1RAPL1, HTR2A	755	111	13528	1.93707	1	0.4644	56.0601
GOTERM_BP_FAT	GO:0043069~negative regulation of programmed cell death	29	2.95617	0.0452429	MEF2C, ERBB3, SNCA, TAF9B, TGFB3, NFKBIA, HSPA1A, HSPA1B, TCF7L2, MAP3K7, IGF1R, KRAS, RB1CC1, PIK3CA, POU3F3, PCSK6, RASA1, EGFR, CRYAB, TMBIM6, PIM3, NOTCH2, PSEN1, GSK3B, HIPK2, BNIP3L, SORT1, SEMA4D, APBB2, CACNA1A	755	359	13528	1.44741	1	0.463837	56.1776
GOTERM_BP_FAT	GO:0051272~positive regulation of cell motion	11	1.1213	0.0461411	EGFR, IGF1R, SPAG9, IRS2, PLD1, FLT1, ARHGAP5, ACTN4, PDGFA, INSR, PIK3R1	755	98	13528	2.01119	1	0.468935	56.9065
GOTERM_BP_FAT	GO:0060548~negative regulation of cell death	29	2.95617	0.0464605	MEF2C, ERBB3, SNCA, TAF9B, TGFB3, NFKBIA, HSPA1A, HSPA1B, TCF7L2, MAP3K7, IGF1R, KRAS, RB1CC1, PIK3CA, POU3F3, PCSK6, RASA1, EGFR, CRYAB, TMBIM6, PIM3, NOTCH2, PSEN1, GSK3B, HIPK2, BNIP3L, SORT1, SEMA4D, APBB2, CACNA1A	755	360	13528	1.44338	1	0.469666	57.1629
GOTERM_BP_FAT	GO:0045184~establishment of protein localization	55	5.60652	0.0464757	XPO1, COPA, ZMAT3, TGFB3, KIF13A, TRAK2, ANK3, VPS13A, TPR, AGAP1, KPNB1, KIF13B, STX1A, MYO6, ACTN4, STXBP3, RAB11FIP2, RAB11FIP3, ATG4C, PSEN1, STXBP5, IPO7, RAB14, SORT1, GNAS, SRP72, KPNA2, RAB3A, SNX9, NFKBIA, RFFL, CHMP2B, MACF1, STX16, PPP3CB, TNKS, SNAP23, TNPO2, TNPO1, TNPO3, SYS1, SNX27, NASP, RAB31, RAB30, ERBB2IP, CADPS2, GRIA2, TOM1L2, GSK3B, SPTBN1, SYTL2, GOSR1, LRP2, TOB1	755	769	13528	1.28151	1	0.468143	57.1751
GOTERM_BP_FAT	GO:0003001~generation of a signal involved in cell-cell signaling	10	1.01937	0.0466547	RAB3A, STX1A, P2RX7, MYO6, PSEN1, CAMK2G, NTRK2, RAB14, LRP2, CACNA1A	755	85	13528	2.10799	1	0.467839	57.3181
GOTERM_BP_FAT	GO:0014003~oligodendrocyte development	4	0.407747	0.0475071	ASCL1, ZNF488, PLP1, NKX2-2	755	15	13528	4.7781	1	0.47246	57.9931
GOTERM_BP_FAT	GO:0016079~synaptic vesicle exocytosis	4	0.407747	0.0475071	RAB3A, STX1A, P2RX7, PSEN1	755	15	13528	4.7781	1	0.47246	57.9931
GOTERM_BP_FAT	GO:0032273~positive regulation of protein polymerization	5	0.509684	0.0476391	MAPT, MAP1B, RAC1, RICTOR, TERF1	755	25	13528	3.58358	1	0.471801	58.0967
GOTERM_BP_FAT	GO:0048514~blood vessel morphogenesis	19	1.9368	0.0477641	GNA13, FLT1, PDGFA, PGF, DICER1, WASF2, APOLD1, CDH2, ZFP36L1, MAP3K7, PTK2, NTRK2, QKI, ZFPM2, RBPJ, VEZF1, FGF1, RASA1, SMARCA4	755	211	13528	1.61346	1	0.471098	58.1946
GOTERM_BP_FAT	GO:0007422~peripheral nervous system development	6	0.611621	0.0478207	SLC5A3, SOX10, ERBB3, UGT8, PMP22, SOX8	755	36	13528	2.98631	1	0.469907	58.2389
GOTERM_BP_FAT	GO:0031667~response to nutrient levels	18	1.83486	0.0487611	CCK, ATG12, PDGFA, FADS1, SOX2, MAP1B, ADIPOR2, ENSA, ACSL1, PSEN1, ATG4C, TFRC, CD44, LRP2, AACS, INSR, TNRC6A, SPP1	755	197	13528	1.63717	1	0.475047	58.9677
GOTERM_BP_FAT	GO:0035023~regulation of Rho protein signal transduction	11	1.1213	0.0488842	RALBP1, PREX1, SOS2, RAC1, LPAR1, RICTOR, CDH2, MCF2L, ARHGEF10, KALRN, FGD4	755	99	13528	1.99088	1	0.47433	59.0623
GOTERM_BP_FAT	GO:0007610~behavior	36	3.66972	0.0491395	SCN1A, ADCY1, CCK, ENPP2, PDGFA, SNCA, SOBP, COMT, APLP2, ATP2B2, SLC1A2, KRAS, CHD7, RAC1, PTN, STRBP, SEPP1, SHC3, IL1RAPL1, NOVA1, PLD1, MYO6, RALBP1, GRIN2A, ATP1A2, STAT3, EPHA4, S100B, CXCL14, PSEN1, FYN, HIPK2, NTRK2, CMTM4, CACNA1A, HTR2A	755	469	13528	1.37536	1	0.474553	59.2577
GOTERM_BP_FAT	GO:0010721~negative regulation of cell development	7	0.713558	0.0492316	MAG, PTK2, PSEN1, TTC3, RUFY3, MBP, SPP1	755	48	13528	2.61302	1	0.473626	59.3279
GOTERM_BP_FAT	GO:0009791~post-embryonic development	9	0.917431	0.0496313	RAB3A, MUT, PSEN1, DHCR7, ARID5B, MAPK8IP3, GNAS, SEPP1, PLEKHA1	755	73	13528	2.20905	1	0.474861	59.6315
GOTERM_BP_FAT	GO:0040007~growth	17	1.73293	0.0496364	FGFR2, KLK6, SOX10, ARID5B, TGFB3, FOXO3, NOTCH2, SLC1A2, PSEN1, ERBB2IP, DHCR7, WHSC1L1, SEPP1, GAP43, CACNA1A, SMARCA4, PLEKHA1	755	183	13528	1.6645	1	0.473336	59.6354
GOTERM_BP_FAT	GO:0042981~regulation of apoptosis	57	5.8104	0.0497953	MEF2C, PREX1, ZMAT3, SNCA, TGFB3, FOXO3, MCF2L, MAP3K7, CD44, BOK, PIK3CA, EGFR, ACTN4, CRYAB, GRIN2A, MBD4, PIM3, PRKCE, PSEN1, HIPK1, HIPK2, SORT1, SEMA4D, KALRN, CCK, ERBB3, TAF9B, NFKBIA, HSPA1A, HSPA1B, NR3C1, ZBTB16, SOX9, TCF7L2, SERINC3, IGF1R, KRAS, RB1CC1, SOS2, RAC1, POU3F3, PCSK6, RASA1, TERF1, HIP1, FGD4, TXNIP, SPPL3, CREB1, TMBIM6, MAL, NOTCH2, P2RX7, CSRNP3, GSK3B, BNIP3L, APBB2, …	755	804	13528	1.2703	1	0.472891	59.7555
GOTERM_BP_FAT	GO:0010628~positive regulation of gene expression	43	4.38328	0.0508609	MEF2C, THRB, SOX2, PAX6, TGFB3, NFKBIA, RORB, FOXO3, SOX9, TCF7L2, SOX8, CBFB, ZBTB38, ZNF148, POU3F3, TCF4, KDM5A, NKX2-2, KLF6, SOX10, SATB2, MYO6, SMAD9, CREB1, ESRRG, TEAD1, TTF1, ARID1A, CREB5, MED13, AFF1, STAT3, NRIP1, ASCL1, NCOA3, CSRNP3, BPTF, HIPK2, ZFPM2, ZNF462, NFIC, NFIB, SMARCA4	755	581	13528	1.32611	1	0.478698	60.5522
GOTERM_BP_FAT	GO:0032868~response to insulin stimulus	11	1.1213	0.0517344	PHIP, IGF1R, PDPK1, IRS2, ERBB3, FADS1, GAB1, SOCS7, SORT1, INSR, PIK3R1	755	100	13528	1.97097	1	0.483098	61.1941
GOTERM_BP_FAT	GO:0050808~synapse organization	8	0.815494	0.0521275	ATP2B2, MYO6, ANK3, MAP1B, NFASC, NRXN1, CDH2, CACNA1A	755	61	13528	2.34989	1	0.484204	61.4798
GOTERM_BP_FAT	GO:0032147~activation of protein kinase activity	12	1.22324	0.0529208	MAP3K7, EGFR, PDPK1, ADCY1, PRKAR2A, ADCY2, FLT1, CCK, PSEN1, MAP3K13, INSR, GAP43	755	114	13528	1.88609	1	0.487969	62.0502
GOTERM_BP_FAT	GO:0006913~nucleocytoplasmic transport	15	1.52905	0.053135	PABPN1, XPO1, TGFB3, NFKBIA, SET, IPO7, GSK3B, PPP3CB, SPTBN1, TNPO2, TPR, KPNA2, KPNB1, TNPO1, TOB1	755	156	13528	1.72287	1	0.487852	62.203
GOTERM_BP_FAT	GO:0021782~glial cell development	5	0.509684	0.0539117	EGFR, ASCL1, ZNF488, PLP1, NKX2-2	755	26	13528	3.44575	1	0.491437	62.7516
GOTERM_BP_FAT	GO:0006695~cholesterol biosynthetic process	5	0.509684	0.0539117	CYP51A1, DHCR7, LSS, IDI1, FDFT1	755	26	13528	3.44575	1	0.491437	62.7516
GOTERM_BP_FAT	GO:0051588~regulation of neurotransmitter transport	5	0.509684	0.0539117	RAB3A, STX1A, SNCA, NTRK2, CACNA1A	755	26	13528	3.44575	1	0.491437	62.7516
GOTERM_BP_FAT	GO:0048864~stem cell development	5	0.509684	0.0539117	NOTCH2, DICER1, SOX2, MSI2, TCF7L2	755	26	13528	3.44575	1	0.491437	62.7516
GOTERM_BP_FAT	GO:0035137~hindlimb morphogenesis	5	0.509684	0.0539117	CHD7, DICER1, GNAS, ZBTB16, SMARCA4	755	26	13528	3.44575	1	0.491437	62.7516
GOTERM_BP_FAT	GO:0016568~chromatin modification	23	2.34455	0.0539841	BMI1, SATB2, EHMT1, NASP, EZH1, TTF1, ARID1A, NR3C1, CHD9, CHD7, BPTF, KDM2A, PHF1, WHSC1L1, ASH1L, KDM4B, JMJD1C, TLK2, KDM5A, CHD5, SMARCA4, SUV420H1, TERF1	755	274	13528	1.50406	1	0.49038	62.8024
GOTERM_BP_FAT	GO:0014065~phosphoinositide 3-kinase cascade	3	0.30581	0.0540428	IGF1R, ERBB3, PIK3R1	755	7	13528	7.67909	1	0.489241	62.8435
GOTERM_BP_FAT	GO:0007435~salivary gland morphogenesis	3	0.30581	0.0540428	EGFR, PAX6, TGFB3	755	7	13528	7.67909	1	0.489241	62.8435
GOTERM_BP_FAT	GO:0002009~morphogenesis of an epithelium	11	1.1213	0.0546929	MAP3K7, MIB1, NOTCH2, CD44, PGF, LMO4, ZEB2, CA2, GREM1, SHANK3, ZIC2	755	101	13528	1.95145	1	0.49195	63.2959
GOTERM_BP_FAT	GO:0043067~regulation of programmed cell death	57	5.8104	0.055643	MEF2C, PREX1, ZMAT3, SNCA, TGFB3, FOXO3, MCF2L, MAP3K7, CD44, BOK, PIK3CA, EGFR, ACTN4, CRYAB, GRIN2A, MBD4, PIM3, PRKCE, PSEN1, HIPK1, HIPK2, SORT1, SEMA4D, KALRN, CCK, ERBB3, TAF9B, NFKBIA, HSPA1A, HSPA1B, NR3C1, ZBTB16, SOX9, TCF7L2, SERINC3, IGF1R, KRAS, RB1CC1, SOS2, RAC1, POU3F3, PCSK6, RASA1, TERF1, HIP1, FGD4, TXNIP, SPPL3, CREB1, TMBIM6, MAL, NOTCH2, P2RX7, CSRNP3, GSK3B, BNIP3L, APBB2, …	755	812	13528	1.25778	1	0.496544	63.9478
GOTERM_BP_FAT	GO:0006900~membrane budding	4	0.407747	0.0561227	COPA, P2RX7, PICALM, HIP1	755	16	13528	4.47947	1	0.498086	64.2727
GOTERM_BP_FAT	GO:0022612~gland morphogenesis	4	0.407747	0.0561227	EGFR, ERBB3, PAX6, TGFB3	755	16	13528	4.47947	1	0.498086	64.2727
GOTERM_BP_FAT	GO:0050982~detection of mechanical stimulus	4	0.407747	0.0561227	ATP2B2, SLC12A2, FYN, SOX2	755	16	13528	4.47947	1	0.498086	64.2727
GOTERM_BP_FAT	GO:0006812~cation transport	41	4.17941	0.0562626	SLC5A3, KCNJ16, TF, SLC44A1, SCN1A, ATP1B1, SLC38A2, SLC20A1, CAMK2G, TRIM13, KCNJ10, KCNJ2, AQP1, KCNJ3, ATP2B2, KCNS1, PPP3CB, SLC4A8, SLC31A2, TRPM3, SGK1, SLC12A2, KCNB1, GRIN2A, ATP1A2, KCTD6, SLC17A7, P2RX7, SLC17A6, KCNJ6, PSEN1, KCNJ9, FYN, SLC6A8, SLC25A37, SCN8A, SLC38A1, SLC5A11, TRAPPC10, CACNA1A, KCTD12	755	553	13528	1.32845	1	0.497465	64.367
GOTERM_BP_FAT	GO:0051169~nuclear transport	15	1.52905	0.0579253	PABPN1, XPO1, TGFB3, NFKBIA, SET, IPO7, GSK3B, PPP3CB, SPTBN1, TNPO2, TPR, KPNA2, KPNB1, TNPO1, TOB1	755	158	13528	1.70106	1	0.506373	65.4692
GOTERM_BP_FAT	GO:0010941~regulation of cell death	57	5.8104	0.0579615	MEF2C, PREX1, ZMAT3, SNCA, TGFB3, FOXO3, MCF2L, MAP3K7, CD44, BOK, PIK3CA, EGFR, ACTN4, CRYAB, GRIN2A, MBD4, PIM3, PRKCE, PSEN1, HIPK1, HIPK2, SORT1, SEMA4D, KALRN, CCK, ERBB3, TAF9B, NFKBIA, HSPA1A, HSPA1B, NR3C1, ZBTB16, SOX9, TCF7L2, SERINC3, IGF1R, KRAS, RB1CC1, SOS2, RAC1, POU3F3, PCSK6, RASA1, TERF1, HIP1, FGD4, TXNIP, SPPL3, CREB1, TMBIM6, MAL, NOTCH2, P2RX7, CSRNP3, GSK3B, BNIP3L, APBB2, …	755	815	13528	1.25315	1	0.505092	65.4929
GOTERM_BP_FAT	GO:0030335~positive regulation of cell migration	10	1.01937	0.0593991	EGFR, IGF1R, SPAG9, IRS2, PLD1, FLT1, ARHGAP5, PDGFA, INSR, PIK3R1	755	89	13528	2.01325	1	0.512409	66.4193
GOTERM_BP_FAT	GO:0008219~cell death	51	5.19878	0.0609006	MEF2C, ZMAT3, PREX1, FOXO3, MCF2L, UNC5B, PAK2, UNC5A, BOK, LUC7L3, CCAR1, SGK1, KIF5A, FA2H, DDIT4, RNF130, PSEN1, HIPK2, SH3KBP1, MDM4, KALRN, PHLPP1, CCK, LITAF, ERBB3, TAF9B, NFKBIA, RTKN, ZBTB16, RFFL, GREM1, KRAS, TTBK2, RAC1, TMEM123, SOS2, NEFH, FGD4, TERF1, HIP1, PLP1, TMBIM6, RYBP, FXR1, SEMA6A, P2RX7, CSRNP3, BNIP3L, CACNA1A, SLC5A11, HTR2A	755	719	13528	1.27095	1	0.519952	67.3619
GOTERM_BP_FAT	GO:0043254~regulation of protein complex assembly	10	1.01937	0.0629019	CCK, GSK3B, MAPT, MAP1B, RAC1, SPTBN1, RDX, RICTOR, RASA1, TERF1	755	90	13528	1.99088	1	0.53025	68.5793
GOTERM_BP_FAT	GO:0018209~peptidyl-serine modification	6	0.611621	0.0638373	TTBK2, SBK1, GSK3B, TNKS, CLK1, UHMK1	755	39	13528	2.7566	1	0.534163	69.1335
GOTERM_BP_FAT	GO:0031399~regulation of protein modification process	24	2.44648	0.0650125	EGFR, CCK, ANAPC5, PDGFA, PTPLAD1, SNCA, TGFB3, ZEB2, RICTOR, PRKCE, MAP4K5, P2RX7, PRKAR2A, SET, PSEN1, MAP3K2, MAP3K9, RB1CC1, GAB1, MAPK8IP3, INSR, BUB3, HHATL, FGD4	755	295	13528	1.45773	1	0.53938	69.8168
GOTERM_BP_FAT	GO:0045740~positive regulation of DNA replication	5	0.509684	0.0677243	IGF1R, PDGFA, TGFB3, TNKS, INSR	755	28	13528	3.19962	1	0.553036	71.3393
GOTERM_BP_FAT	GO:0030705~cytoskeleton-dependent intracellular transport	7	0.713558	0.0679583	NDE1, MYO6, KIF5B, MACF1, KLC1, WASF2, WIPF1	755	52	13528	2.41202	1	0.552813	71.4672
GOTERM_BP_FAT	GO:0007219~Notch signaling pathway	7	0.713558	0.0679583	MIB1, ASCL1, NOTCH2, PSEN1, NOTCH2NL, SPEN, RBPJ	755	52	13528	2.41202	1	0.552813	71.4672
GOTERM_BP_FAT	GO:0016050~vesicle organization	7	0.713558	0.0679583	RAB3A, COPA, P2RX7, GNAI3, PICALM, SORT1, HIP1	755	52	13528	2.41202	1	0.552813	71.4672
GOTERM_BP_FAT	GO:0006886~intracellular protein transport	29	2.95617	0.0683505	SNX9, XPO1, COPA, TGFB3, NFKBIA, RFFL, MACF1, TRAK2, STX16, PPP3CB, TPR, TNPO2, TNPO1, KPNB1, KIF13B, STX1A, MYO6, ERBB2IP, ATG4C, IPO7, TOM1L2, GSK3B, SORT1, SPTBN1, SYTL2, SRP72, GOSR1, KPNA2, TOB1	755	374	13528	1.38935	1	0.553457	71.6804
GOTERM_BP_FAT	GO:0043623~cellular protein complex assembly	15	1.52905	0.0683665	XPO1, TCP1, HSP90AA1, PREX1, ANLN, GAS7, PTK2, PICALM, IPO7, RAC1, TNPO2, TNPO1, KPNB1, CACNA1A, HIP1	755	162	13528	1.65906	1	0.552048	71.6891
GOTERM_BP_FAT	GO:0016265~death	51	5.19878	0.068596	MEF2C, ZMAT3, PREX1, FOXO3, MCF2L, UNC5B, PAK2, UNC5A, BOK, LUC7L3, CCAR1, SGK1, KIF5A, FA2H, DDIT4, RNF130, PSEN1, HIPK2, SH3KBP1, MDM4, KALRN, PHLPP1, CCK, LITAF, ERBB3, TAF9B, NFKBIA, RTKN, ZBTB16, RFFL, GREM1, KRAS, TTBK2, RAC1, TMEM123, SOS2, NEFH, FGD4, TERF1, HIP1, PLP1, TMBIM6, RYBP, FXR1, SEMA6A, P2RX7, CSRNP3, BNIP3L, CACNA1A, SLC5A11, HTR2A	755	724	13528	1.26217	1	0.551807	71.8131
GOTERM_BP_FAT	GO:0021694~cerebellar Purkinje cell layer formation	3	0.30581	0.0694508	ATP2B2, AGTPBP1, CACNA1A	755	8	13528	6.71921	1	0.554945	72.2705
GOTERM_BP_FAT	GO:0021702~cerebellar Purkinje cell differentiation	3	0.30581	0.0694508	ATP2B2, AGTPBP1, CACNA1A	755	8	13528	6.71921	1	0.554945	72.2705
GOTERM_BP_FAT	GO:0043584~nose development	3	0.30581	0.0694508	ASCL1, CHD7, SOX2	755	8	13528	6.71921	1	0.554945	72.2705
GOTERM_BP_FAT	GO:0016601~Rac protein signal transduction	3	0.30581	0.0694508	PTPLAD1, WASF2, RHOU	755	8	13528	6.71921	1	0.554945	72.2705
GOTERM_BP_FAT	GO:0007184~SMAD protein nuclear translocation	3	0.30581	0.0694508	TGFB3, SPTBN1, TOB1	755	8	13528	6.71921	1	0.554945	72.2705
GOTERM_BP_FAT	GO:0021692~cerebellar Purkinje cell layer morphogenesis	3	0.30581	0.0694508	ATP2B2, AGTPBP1, CACNA1A	755	8	13528	6.71921	1	0.554945	72.2705
GOTERM_BP_FAT	GO:0051252~regulation of RNA metabolic process	116	11.8247	0.071769	MEF2C, THRB, TGFB3, SYNCRIP, CNOT2, RORB, FOXO3, CBFB, CBX5, TRAK2, ZFP90, ZNF302, ZNF397, OLIG2, INSR, SATB1, SATB2, MYO6, YY1, ZHX1, MECP2, FOXN2, ARID1A, MED13, FOXN3, ASCL1, TCFL5, CELF4, MGA, ST18, SMARCA4, TSHZ3, TSHZ1, LITAF, SOX2, TAF9B, NFKBIA, ABCA2, SOX9, SOX8, LHX2, TCF4, VEZF1, TCF25, NKX2-2, KLF6, MAFF, SMAD9, EHMT1, KLF9, RYBP, ESRRG, TEAD1, MED13L, MAFK, CDKN1C, NOTCH2, CSRNP3, RB…	755	1813	13528	1.14643	1	0.565768	73.4761
GOTERM_BP_FAT	GO:0048839~inner ear development	9	0.917431	0.0724363	ATP2B2, SPRY2, CHD7, MYO6, PDGFA, SOX2, TGFB3, SOBP, CUX1	755	79	13528	2.04128	1	0.567769	73.8138
GOTERM_BP_FAT	GO:0042692~muscle cell differentiation	12	1.22324	0.0745591	CAST, KRAS, PPP3CB, SEMA4C, MYEF2, SORT1, QKI, NEO1, BIN1, CAPN3, ITGB1, TCF7L2	755	121	13528	1.77698	1	0.577193	74.8614
GOTERM_BP_FAT	GO:0051101~regulation of DNA binding	12	1.22324	0.0745591	MTDH, KRAS, ID2, NCOA3, HIPK2, RUNX1T1, NFKBIA, TNKS, ZNF462, BRD4, MAP3K13, SMARCA4	755	121	13528	1.77698	1	0.577193	74.8614
GOTERM_BP_FAT	GO:0015031~protein transport	53	5.40265	0.0749745	XPO1, COPA, ZMAT3, TGFB3, KIF13A, TRAK2, VPS13A, TPR, AGAP1, KPNB1, KIF13B, STX1A, MYO6, ACTN4, STXBP3, RAB11FIP2, RAB11FIP3, ATG4C, PSEN1, STXBP5, IPO7, RAB14, SORT1, GNAS, SRP72, KPNA2, RAB3A, SNX9, NFKBIA, RFFL, CHMP2B, MACF1, STX16, PPP3CB, TNKS, SNAP23, TNPO2, TNPO1, TNPO3, SYS1, SNX27, NASP, RAB31, RAB30, ERBB2IP, CADPS2, TOM1L2, GSK3B, SPTBN1, SYTL2, GOSR1, LRP2, TOB1	755	762	13528	1.24626	1	0.577819	75.0617
GOTERM_BP_FAT	GO:0018107~peptidyl-threonine phosphorylation	4	0.407747	0.0753751	PDPK1, SBK1, TNKS, CLK1	755	18	13528	3.98175	1	0.578366	75.2535
GOTERM_BP_FAT	GO:0008344~adult locomotory behavior	7	0.713558	0.0786757	EPHA4, SCN1A, CHD7, HIPK2, SNCA, ATP1A2, CACNA1A	755	54	13528	2.32269	1	0.593187	76.7813
GOTERM_BP_FAT	GO:0032355~response to estradiol stimulus	7	0.713558	0.0786757	TXNIP, PDGFA, CRYAB, SLC25A36, MAP1B, INSR, STAT3	755	54	13528	2.32269	1	0.593187	76.7813
GOTERM_BP_FAT	GO:0044093~positive regulation of molecular function	42	4.28135	0.0794673	GNA13, ADCY1, CCK, ADCY2, MTDH, PTPLAD1, GNA11, TGFB3, ZEB2, LPAR1, MAP3K7, PDPK1, SERINC5, PRKAR2A, KRAS, MAP3K2, MAP3K9, GAB1, RAC1, BRD4, INSR, HIP1, TERF1, FGD4, EGFR, FLT1, ACTN4, ANAPC5, RALBP1, SPAG9, MAP4K5, P2RX7, NCOA3, PSEN1, HIPK2, NTRK2, MAPK8IP3, GNAS, MAP3K13, GAP43, HTR2A, SMARCA4	755	586	13528	1.28422	1	0.595539	77.1342
GOTERM_BP_FAT	GO:0006417~regulation of translation	13	1.32518	0.0803963	EIF5B, MKNK2, MKNK1, CPEB1, PAIP2B, ZFP36L1, EIF4G3, TNRC6C, QKI, TNRC6B, TNRC6A, DNAJC1, SAMD4A	755	137	13528	1.70024	1	0.598516	77.5419
GOTERM_BP_FAT	GO:0033044~regulation of chromosome organization	5	0.509684	0.0831797	SET, SNCA, TNKS, TLK2, TERF1	755	30	13528	2.98631	1	0.610091	78.7229
GOTERM_BP_FAT	GO:0030510~regulation of BMP signaling pathway	5	0.509684	0.0831797	TRIM33, HIPK2, GREM1, PCSK6, TOB1	755	30	13528	2.98631	1	0.610091	78.7229
GOTERM_BP_FAT	GO:0032271~regulation of protein polymerization	8	0.815494	0.0835252	MAPT, MAP1B, RAC1, SPTBN1, RDX, RICTOR, RASA1, TERF1	755	68	13528	2.10799	1	0.610227	78.8653
GOTERM_BP_FAT	GO:0021915~neural tube development	8	0.815494	0.0835252	MAP3K7, MIB1, PSEN1, LMO4, PAX6, ZEB2, TCF7L2, ZIC2	755	68	13528	2.10799	1	0.610227	78.8653
GOTERM_BP_FAT	GO:0048008~platelet-derived growth factor receptor signaling pathway	4	0.407747	0.0859501	TXNIP, PDGFA, ARID5B, PLEKHA1	755	19	13528	3.77219	1	0.619773	79.8399
GOTERM_BP_FAT	GO:0007224~smoothened signaling pathway	4	0.407747	0.0859501	HIPK1, HIPK2, HHIP, NKX2-2	755	19	13528	3.77219	1	0.619773	79.8399
GOTERM_BP_FAT	GO:0045176~apical protein localization	3	0.30581	0.0860805	RAB14, RDX, MAL	755	9	13528	5.97263	1	0.618912	79.8911
GOTERM_BP_FAT	GO:0050910~detection of mechanical stimulus involved in sensory perception of sound	3	0.30581	0.0860805	ATP2B2, SLC12A2, SOX2	755	9	13528	5.97263	1	0.618912	79.8911
GOTERM_BP_FAT	GO:0006895~Golgi to endosome transport	3	0.30581	0.0860805	RAB14, SORT1, VPS13A	755	9	13528	5.97263	1	0.618912	79.8911
GOTERM_BP_FAT	GO:0007565~female pregnancy	11	1.1213	0.0863383	LNPEP, DDR1, FLT1, KLF9, PGF, SP3, TGFB3, ADIPOR2, GNAS, COMT, SPP1	755	110	13528	1.79179	1	0.618624	79.992
GOTERM_BP_FAT	GO:0060627~regulation of vesicle-mediated transport	10	1.01937	0.086637	MIB1, RAB3A, STX1A, ACTN4, SNCA, RAC1, STXBP3, BIN1, CACNA1A, HIP1	755	96	13528	1.86645	1	0.618519	80.1082
GOTERM_BP_FAT	GO:0006397~mRNA processing	25	2.54842	0.0881957	TRA2A, SYNCRIP, CPEB1, PNN, SF3B1, SRRM2, PCBP2, QKI, SRRM1, LUC7L3, NOVA1, SPOP, CCAR1, PRPF40A, KHDRBS1, PABPN1, SRPK2, MTPAP, ELAVL4, PAPOLA, PAPD4, CELF2, LSM11, RNPC3, RBM17	755	321	13528	1.39547	1	0.623957	80.7045
GOTERM_BP_FAT	GO:0043434~response to peptide hormone stimulus	14	1.42712	0.0887052	IRS2, PLD1, ERBB3, FADS1, MAP1B, SOCS7, STAT3, PHIP, IGF1R, PDPK1, GAB1, SORT1, INSR, PIK3R1	755	154	13528	1.6289	1	0.624754	80.8958
GOTERM_BP_FAT	GO:0010720~positive regulation of cell development	8	0.815494	0.0887359	ZNF488, PLXNB1, MAPT, SOX2, MAP1B, PAX6, TGFB3, SEMA4D	755	69	13528	2.07744	1	0.623471	80.9072
GOTERM_BP_FAT	GO:0048592~eye morphogenesis	8	0.815494	0.0887359	YY1, SP3, SOX2, NTRK2, PAX6, RORB, COL5A2, STAT3	755	69	13528	2.07744	1	0.623471	80.9072
GOTERM_BP_FAT	GO:0001838~embryonic epithelial tube formation	6	0.611621	0.0893068	MAP3K7, MIB1, LMO4, ZEB2, SHANK3, ZIC2	755	43	13528	2.50017	1	0.624531	81.1193
GOTERM_BP_FAT	GO:0051899~membrane depolarization	6	0.611621	0.0893068	P2RX7, CCK, SNCA, PPP3CB, GRIN2A, CACNA1A	755	43	13528	2.50017	1	0.624531	81.1193
GOTERM_BP_FAT	GO:0007162~negative regulation of cell adhesion	6	0.611621	0.0893068	RND1, SRCIN1, ERBB3, TNR, RASA1, PIK3R1	755	43	13528	2.50017	1	0.624531	81.1193
GOTERM_BP_FAT	GO:0007584~response to nutrient	13	1.32518	0.0909966	PDGFA, FADS1, MAP1B, SOX2, ADIPOR2, ENSA, ACSL1, CD44, TFRC, LRP2, AACS, INSR, SPP1	755	140	13528	1.6638	1	0.630355	81.7339
GOTERM_BP_FAT	GO:0016071~mRNA metabolic process	28	2.85423	0.0915013	TRA2A, PNPT1, SYNCRIP, HSPA1A, CPEB1, HSPA1B, PNN, ZFP36L1, SF3B1, SRRM2, PCBP2, SRRM1, QKI, LUC7L3, NOVA1, PRPF40A, CCAR1, SPOP, KHDRBS1, PABPN1, SRPK2, MTPAP, ELAVL4, PAPOLA, PAPD4, LSM11, CELF2, RNPC3, RBM17	755	370	13528	1.35595	1	0.631089	81.9138
GOTERM_BP_FAT	GO:0008610~lipid biosynthetic process	25	2.54842	0.0919842	CYP51A1, LSS, FDFT1, ELOVL1, SERINC5, ELOVL5, DHCR7, FASN, QKI, ELOVL7, ACSL3, AGPAT3, PLP1, PLD1, SPTLC2, SCD, FADS1, FA2H, UGCG, CDS1, CERCAM, P2RX7, SEMA6D, ST8SIA5, IDI1	755	323	13528	1.38683	1	0.631726	82.0843
GOTERM_BP_FAT	GO:0007507~heart development	18	1.83486	0.0924492	ERBB3, GNA11, ADIPOR2, TEAD1, SOX9, ITGB1, MIB1, CHD7, PSEN1, ID2, RB1CC1, PPP3CB, ZFPM2, ADAMTS1, RBPJ, INSR, TCF25, SMARCA4	755	215	13528	1.5001	1	0.632282	82.2471
GOTERM_BP_FAT	GO:0045637~regulation of myeloid cell differentiation	8	0.815494	0.0941262	ZBTB7A, ID2, NFKBIA, GNAS, ZBTB16, CA2, FOXO3, TOB2	755	70	13528	2.04776	1	0.637845	82.8227
GOTERM_BP_FAT	GO:0040017~positive regulation of locomotion	10	1.01937	0.0955896	EGFR, IGF1R, SPAG9, IRS2, PLD1, FLT1, ARHGAP5, PDGFA, INSR, PIK3R1	755	98	13528	1.82836	1	0.642431	83.3105
GOTERM_BP_FAT	GO:0035148~tube lumen formation	6	0.611621	0.0963877	MAP3K7, MIB1, LMO4, ZEB2, SHANK3, ZIC2	755	44	13528	2.44335	1	0.644274	83.571
GOTERM_BP_FAT	GO:0007214~gamma-aminobutyric acid signaling pathway	4	0.407747	0.0971121	GABRA1, SLC12A2, GABBR2, CACNA1A	755	20	13528	3.58358	1	0.645802	83.8041
GOTERM_BP_FAT	GO:0008202~steroid metabolic process	17	1.73293	0.099151	LIPA, CYP51A1, OSBPL9, OSBPL6, SORL1, LSS, ABCA2, NR3C1, COMT, FDFT1, NPC1, OSBPL1A, DHCR7, INSIG1, SULT1A3, ATP8B1, SULT1A4, IDI1	755	202	13528	1.50794	1	0.652482	84.4436

## Sheet: Process 5 G5>0.01
Transcripts participating in unbalanced process 5 (only those with G5>0.01*; see Supp. Table 2) were categorized according to GO:
Term	Count	%	PValue	Genes	List Total	Pop Hits	Pop Total	Fold Enrichment	Benjamini
GO:0098609~cell-cell adhesion	55	4.84155	3.14923e-15	HSP90AB1, SEPT2, RPL15, WASF2, EIF5, H1FX, RPS2, PRDX1, RAB1A, EFHD2, PICALM, PCBP1, BAG3, RANBP1, AHNAK, BSG, RAN, PFKP, PI4KA, EEF2, ELMO2, EIF4G1, PRDX6, EEF1G, MAPRE1, EEF1D, ADD1, SEPT9, EPN2, YWHAZ, CNN3, HSPA1A, ABI1, CAPZB, PFN1, HNRNPK, SH3GLB2, MACF1, SH3GLB1, FASN, PCMT1, HSPA5, HSPA8, ENO1, PLEC, S100A11, YWHAE, ANXA2, RPL29, MPRIP, SPTBN1, DNAJB1, TJP2, PUF60, SPTAN1	1006	271	16792	3.38764	1.24469e-11		Note: The complete lists showing the transcripts affected by each of the unbalanced processes are shown in Supp. Table 2. Note that the positive and negative G values show correlations and anti-correlations between transcripts. All transcripts assigned positive G values undergo deviations in expression levels that are opposite from the deviations of the transcripts assigned negative G values. The…
GO:0006413~translational initiation	34	2.99296	3.61303e-12	RPL18, RPL13, EIF5, RPL15, RPL35, RPS15A, RPS2, EIF3C, EIF3CL, EIF3G, RPLP0, EIF3F, RPL8, RPL3, EIF3K, FAU, RPL10, RPL11, RPL10A, PABPC1, RPL12, RPS9, RPS6, RPS5, RPL29, RPS7, EIF4G1, EIF4B, RPS19, RPS16, RPL18A, RPL13A, EIF4A1, EIF2S2	1006	137	16792	4.1425	7.23322e-09
GO:0060333~interferon-gamma-mediated signaling pathway	22	1.93662	5.26655e-10	HLA-DQB1, HLA-DRB1, HLA-DRB3, HLA-A, HLA-C, HLA-B, HLA-E, HLA-G, HLA-F, B2M, NCAM1, CD44, FCGR1B, CAMK2D, HLA-DRB4, HLA-DRB5, IRF3, HLA-DPA1, HLA-DPB1, CAMK2A, IFNGR1, HLA-DRA	1006	71	16792	5.17212	7.02909e-07
GO:0019886~antigen processing and presentation of exogenous peptide antigen via MHC class II	25	2.2007	5.49392e-10	HLA-DQB1, DYNC1LI2, AP1M1, SEC31A, HLA-DRB1, KIF5A, HLA-DRB3, AP2S1, DCTN6, HLA-DMB, CANX, CD74, DCTN1, DCTN2, AP2A2, ARF1, KLC1, ACTR1A, HLA-DRB4, HLA-DRB5, FCER1G, HLA-DPA1, HLA-DPB1, HLA-DRA, AP2M1	1006	92	16792	4.53583	5.49941e-07
GO:0000184~nuclear-transcribed mRNA catabolic process, nonsense-mediated decay	27	2.37676	6.52198e-09	RPL18, RPL13, RPL15, RPL35, RPS15A, RPS2, RBM8A, RPLP0, RPL8, RPL3, RPL10, FAU, RPL11, PABPC1, RPL10A, RPL12, PPP2R1A, RPS9, RPS6, RPS5, RPL29, RPS7, EIF4G1, RPS19, RPS16, RPL18A, RPL13A	1006	119	16792	3.78723	5.22279e-06
GO:0019882~antigen processing and presentation	18	1.58451	1.11326e-08	HLA-DQB1, HLA-DRB1, RAB4A, HLA-DRB3, HLA-A, HLA-C, HLA-B, HLA-DMB, HLA-E, HLA-G, CD74, RAB34, HLA-DRB4, HLA-DRB5, HLA-DPA1, HLA-DPB1, CTSH, HLA-DRA	1006	55	16792	5.46279	7.42915e-06
GO:0008360~regulation of cell shape	29	2.55282	1.37808e-08	PALM, CCL2, FERMT2, GNA12, ITGB2, TPM1, PTK2, EZR, PTK2B, PTN, MSN, CDC42EP4, ARHGDIA, CSF1R, FN1, DLG1, CSNK1A1, PLXNB1, PLXNB2, PLXNB3, ANXA1, SLC9A3R1, S100A13, CORO1A, S100B, FYN, ITGA7, CYFIP1, WDR1	1006	140	16792	3.4576	7.88257e-06
GO:0002479~antigen processing and presentation of exogenous peptide antigen via MHC class I, TAP-dependent	19	1.67254	1.65886e-08	HLA-A, HLA-C, HLA-B, HLA-E, HLA-G, HLA-F, B2M, PSMA1, PSMB4, PSMB1, PSMD11, PSMC3, PSME2, PSMB3, FCGR1B, PSMC1, PSMD3, PSMD4, PSMD8	1006	63	16792	5.03405	8.30256e-06
GO:0006614~SRP-dependent cotranslational protein targeting to membrane	23	2.02465	2.51057e-08	RPL18, RPL13, RPL15, RPL35, RPS15A, RPS9, RPS2, RPS6, RPS5, RPL29, RPS7, RPS19, RPS16, RPL18A, RPL13A, RPLP0, RPL8, RPL3, FAU, RPL10, RPL11, RPL12, RPL10A	1006	94	16792	4.08418	1.11692e-05
GO:0002474~antigen processing and presentation of peptide antigen via MHC class I	13	1.14437	6.26405e-08	HLA-DQB1, SEC31A, HLA-A, HLA-C, HLA-B, CALR, HLA-E, CANX, HLA-G, B2M, BCAP31, HLA-F, TAPBP	1006	30	16792	7.23313	2.50809e-05
GO:0016032~viral process	44	3.87324	7.88651e-08	AP1M1, POLR2E, IL6ST, RAD23A, VIM, WASF2, ABI1, SF3B2, PAAF1, PSMB4, TNFRSF1A, SET, HNRNPK, PSMB1, KLC1, PSMB3, NPM1, RHOA, RANBP1, HSPA8, DLG1, RAN, HLA-A, UBR4, FDPS, ATP6V1H, HLA-C, UBE2I, HLA-B, NXF1, LMBRD1, YWHAE, VDAC1, EIF4G1, C1QBP, FYN, PSMC3, TSC2, MAPK3, EIF4A1, PDGFRA, HSPD1, BIN1, HLA-DRA	1006	299	16792	2.45633	2.87065e-05
GO:0043488~regulation of mRNA stability	23	2.02465	1.44149e-07	ZFP36, YWHAZ, HSPA1A, HSPA1B, EIF4G1, PSMA1, PSMB4, ZFP36L2, SET, PSMB1, PSMD11, PSME2, PSMC3, PSMB3, PSMC1, UBC, PSMD3, HSPB1, PSMD4, PABPC1, PSMD8, SAMD4A, HSPA8	1006	103	16792	3.72731	4.80965e-05
GO:0002576~platelet degranulation	23	2.02465	1.44149e-07	A2M, PSAP, CLU, SERPING1, SPARC, CD63, TIMP3, APLP2, FLNA, TIMP1, VEGFB, CD9, VWF, LGALS3BP, SERPINA3, CALM3, TUBA4A, SERPINA1, WDR1, CALM2, SRGN, FN1, CALM1	1006	103	16792	3.72731	4.80965e-05
GO:0043524~negative regulation of neuron apoptotic process	26	2.28873	2.4653e-07	HSP90AB1, MEF2C, TYRO3, CCL2, CEBPB, SNCB, GABRA5, SNCA, AARS, PINK1, PRKCG, VEGFB, FAM134B, GPI, CORO1A, SET, FYN, APOE, PTK2B, JUN, HIPK2, NTRK2, ILK, DNAJC5, HSPD1, FAIM2	1006	132	16792	3.28779	7.59282e-05
GO:0000398~mRNA splicing, via spliceosome	35	3.08099	4.07097e-07	SRSF1, POLR2E, POLR2L, POLR2J, LSM7, RBM5, YBX1, PNN, SF3B2, HNRNPM, HNRNPK, RBM8A, PCBP1, PRPF8, PCBP2, LSM4, LSM3, PABPC1, HNRNPC, DDX41, HSPA8, DDX39A, SNRPN, DDX39B, PTBP1, SF1, HNRNPR, HNRNPU, SNURF, SRSF3, SRSF2, SRSF5, SRSF7, SRSF9, SNRPB	1006	222	16792	2.6316	0.000116423
GO:0070527~platelet aggregation	14	1.23239	4.28445e-07	ACTB, TYRO3, FIBP, CSRP1, CLIC1, SLC7A11, FLNA, MYL9, ACTG1, ILK, PDGFRA, HSPB1, GNAS, HBB	1006	41	16792	5.69966	0.00011436
GO:0021762~substantia nigra development	15	1.32042	6.49622e-07	ACTB, GLUD1, MAOB, CNP, YWHAE, MBP, YWHAH, RHOA, CALM3, GNB4, HSPA5, NDRG2, S100A1, CALM2, CALM1	1006	49	16792	5.10975	0.000162555
GO:0019083~viral transcription	23	2.02465	6.69713e-07	RPL18, RPL13, RPL15, RPL35, RPS15A, RPS9, RPS2, RPS6, RPS5, RPL29, RPS7, RPS19, RPS16, RPL18A, RPL13A, RPLP0, RPL8, RPL3, FAU, RPL10, RPL11, RPL12, RPL10A	1006	112	16792	3.42779	0.000157725
GO:0050821~protein stabilization	25	2.2007	1.61887e-06	HSP90AB1, HSP90AA1, ATP1B2, HIP1R, PHB, FLOT2, CLU, CHP1, PINK1, CCT2, HSPA1A, HSPA1B, CALR, CDC37, FLNA, ZNF207, LAMP1, PFN1, CDKN1A, BAG6, PPIB, ANK2, BAG3, HSPD1, GAPDH	1006	136	16792	3.06835	0.000360044
GO:0050852~T cell receptor signaling pathway	26	2.28873	2.27005e-06	HLA-DQB1, HLA-DRB1, HLA-DRB3, PSMB4, PSMB1, PSMB3, PDE4B, HLA-DRB4, HLA-DRB5, PSMD3, PSMD4, HLA-DPB1, PAK1, PSMD8, TAB2, THY1, UBE2N, PSMA1, PSMD11, PSME2, PSMC3, FYN, PSMC1, UBC, HLA-DPA1, HLA-DRA	1006	148	16792	2.93235	0.00047827
GO:0007156~homophilic cell adhesion via plasma membrane adhesion molecules	27	2.37676	2.37757e-06	CLSTN2, PCDHGA9, CLSTN1, PCDHGA8, PCDHGC5, PCDHGA7, PCDHGA6, PCDHGC4, PCDHGA5, PCDHGC3, PCDHGA4, PCDHGA3, PCDHGA2, PCDHGA1, PCDHGB1, PCDHGA12, PCDHGA10, PCDHGA11, PLXNB2, PLXNB3, PCDHGB7, PCDHGB6, PCDHGB3, PCDHGB2, PCDHGB5, PCDHGB4, CDH10	1006	158	16792	2.8524	0.000475876
GO:0002504~antigen processing and presentation of peptide or polysaccharide antigen via MHC class II	9	0.792254	2.39569e-06	HLA-DQB1, HLA-DRB1, HLA-DRB3, HLA-DRB4, HLA-DRB5, HLA-DPA1, HLA-DPB1, HLA-DMB, HLA-DRA	1006	17	16792	8.83686	0.000456675
GO:0000165~MAPK cascade	37	3.25704	2.64691e-06	FGFR2, MEF2C, CCL2, NDST1, ITPKB, PEA15, PSMB4, PTK2, PSMB1, PTK2B, PSMB3, CAMK2D, PSMD3, PSMD4, PAK1, FGF1, CAMK2A, PSMD8, ZFP36, MAP2K2, PTPRA, NCAM1, PSMA1, FYN, PSME2, PSMC3, PSMD11, MAPK3, PSMC1, MAPK8IP2, UBC, PDGFRA, SPTBN1, CALM3, CALM2, SPTAN1, CALM1	1006	262	16792	2.35725	0.000481623
GO:0006457~protein folding	29	2.55282	3.08958e-06	HSP90AB1, GNAI2, FKBP5, PDIA6, CCT2, PRKCSH, CALR, CANX, CDC37, BAG3, DNAJA1, GNG2, HSPA8, HSPA9, HSP90AA1, CRYAB, AARS, ERP29, CSNK2B, ST13, PPIF, HSP90B1, GNB2, GNB1, PFDN5, MLEC, DNAJB2, GNB4, DNAJB1	1006	180	16792	2.68924	0.000537712
GO:0002480~antigen processing and presentation of exogenous peptide antigen via MHC class I, TAP-independent	7	0.616197	3.25396e-06	HLA-A, HLA-C, HLA-B, HLA-E, HLA-G, HLA-F, B2M	1006	9	16792	12.9825	0.000542723
GO:0007568~aging	27	2.37676	5.41346e-06	CCL2, ASS1, LITAF, SNCA, ITGB2, CNP, DCN, TIMP2, CANX, TIMP1, FOS, HAMP, CTGF, AGT, JUND, RPN2, CAT, IRAK1, CRYAB, FADS1, TGFBR2, EEF2, SERPING1, CTNNA1, SCAP, SERPINF1, JUN	1006	165	16792	2.73139	0.000866646
GO:0043066~negative regulation of apoptotic process	53	4.66549	5.42544e-06	IL6ST, AIF1, SNCA, YBX3, BNIP3, AQP1, BAG6, CD44, BAG3, TPT1, CAT, CIB1, IRAK1, CRYAB, FLNA, VEGFB, CCND2, UBC, HSPB1, PRNP, MYO18A, CTSH, GSTP1, FAIM2, YWHAZ, SOX9, CD74, TIMP1, MIF, PTK2, HNRNPK, PTK2B, NPM1, DNAJA1, HSPA5, ARHGDIA, HSPA9, ANGPTL4, CSF1R, LAMTOR5, ANXA1, RPS6, CAPN3, PPIF, PRELID1, CDKN1A, HSP90B1, DUSP1, ID1, CD59, ARF4, HSPD1, TIAF1	1006	455	16792	1.94433	0.000835171
GO:0051592~response to calcium ion	15	1.32042	5.88663e-06	TXNIP, S100A16, SEC31A, SPARC, CAPN3, PEF1, DUSP1, PTK2B, ANXA11, CALM3, AHCYL1, RANBP1, PDCD6, CALM2, CALM1	1006	58	16792	4.31686	0.000872587
GO:0042026~protein refolding	8	0.704225	1.13337e-05	HSPA1L, HSP90AA1, DNAJB2, HSPA1A, HSPA1B, HSPD1, HSPA8, B2M	1006	15	16792	8.90232	0.00161942
GO:0010941~regulation of cell death	7	0.616197	1.6124e-05	YWHAZ, CRYAB, JUN, JUND, HSPA1A, HSPA1B, EEF1D	1006	11	16792	10.6221	0.00222377
GO:0007155~cell adhesion	51	4.48944	2.98512e-05	SPG7, ATP1B2, IGFBP7, CLSTN1, BCAN, EDIL3, MOG, PNN, CD44, CTGF, DGCR6, RHOB, TM9SF4, CIB1, TYRO3, PTPRF, FLOT2, ICAM2, CTNNA1, SIRPA, THY1, PCDHGB4, NCAM1, DDR1, CNTN1, VCAN, NCAN, DST, CCL2, CTNND2, ITGB4, PCDHGC4, CLDN10, ITGB2, PCDHGC3, CD9, LGALS3BP, SORBS1, GP1BB, TNR, CD24, GPNMB, FN1, SPP1, APC, COL18A1, CD99, MCAM, VWF, STAB1, ITGA7	1006	459	16792	1.85465	0.00397627
GO:0042493~response to drug	38	3.34507	3.14891e-05	XRCC5, ASS1, ADCYAP1R1, SNCA, GNA12, ABCA2, COMT, AQP1, TIMP2, CALR, ABCA3, HADHA, B2M, FOS, SLC1A3, ACSL1, PTK2B, JUND, PTN, CAT, RPN2, TXNIP, COL18A1, HSP90AA1, LGALS1, TGFBR2, MAOB, ANXA1, CST3, NDUFA10, VEGFB, CDKN1A, NPC1, FYN, JUN, GNAS, HSPD1, MGST1	1006	304	16792	2.08648	0.00405898
GO:0071277~cellular response to calcium ion	13	1.14437	3.57366e-05	MEF2C, CPNE6, ITPKB, CAPN3, PPIF, FOS, CLIC4, ALOX5AP, JUN, JUND, CAMK2D, CPNE3, ASPH	1006	51	16792	4.25479	0.00446164
GO:0006521~regulation of cellular amino acid metabolic process	13	1.14437	3.57366e-05	OAZ2, PSMB4, PSMA1, OAZ1, PSMB1, PSMC3, PSME2, PSMD11, PSMB3, PSMC1, PSMD3, PSMD4, PSMD8	1006	51	16792	4.25479	0.00446164
GO:0010977~negative regulation of neuron projection development	12	1.05634	4.12046e-05	GFAP, CRMP1, LGALS1, VIM, DPYSL3, PAFAH1B1, PMP22, PRKCSH, ITM2C, KANK1, CIB1, B2M	1006	44	16792	4.55232	0.00498712
GO:0006928~movement of cell or subcellular component	17	1.49648	4.41545e-05	ACTB, PALM, ENPP2, VIM, ABI1, TPM1, CAPZB, ACTG1, CD9, CORO1A, TUBB, ARPC2, HSPB1, MSN, ARHGDIA, TUBB4B, ARHGDIB	1006	86	16792	3.29955	0.00518646
GO:0009611~response to wounding	14	1.23239	7.45476e-05	ZFP36, GFAP, CCL2, ITGB4, VWF, ZFP36L2, SRSF5, SLC1A3, SULF2, CTGF, ID3, DST, GAP43, FN1	1006	63	16792	3.7093	0.0084923
GO:0060071~Wnt signaling pathway, planar cell polarity pathway	17	1.49648	0.00010278	AP2S1, PSMA1, PFN1, PSMB4, AP2A2, PSMB1, PSMD11, PSMC3, PSME2, PSMB3, PSMC1, RHOA, UBC, PSMD3, PSMD4, PSMD8, AP2M1	1006	92	16792	3.08436	0.0113669
GO:0042744~hydrogen peroxide catabolic process	8	0.704225	0.000104772	GPX1, PRDX6, GPX3, HBA2, CAT, HBA1, HBB, PRDX1	1006	20	16792	6.67674	0.0112745
GO:1900034~regulation of cellular response to heat	15	1.32042	0.000125744	HSP90AB1, HSP90AA1, CRYAB, HSPA1A, HSPA1B, HSBP1, YWHAE, HSPA1L, BAG3, HSPB8, MAPK3, CAMK2D, DNAJB1, CAMK2A, HSPA8	1006	75	16792	3.33837	0.0131629
GO:0034220~ion transmembrane transport	28	2.46479	0.00014408	S100A6, ATP1B2, ATP6AP1, AQP4, ATP6V1G2, ATP6V1B2, FXYD6, FXYD7, TSC22D3, ATP2B4, TTYH1, ASPH, ATP6V0D1, DLG1, SGK1, GABRA5, ATP6V1H, ATP1A2, ATP6V1D, ATP13A2, ATP6V1C1, GRIA1, ATP6V1E1, RYR1, UBC, CALM3, CALM2, CALM1	1006	210	16792	2.22558	0.0146844
GO:0002223~stimulatory C-type lectin receptor signaling pathway	18	1.58451	0.000157654	ICAM2, TAB2, UBE2N, PSMA1, PSMB4, PSMB1, PSMD11, FYN, PSMC3, PSME2, PSMB3, PSMC1, UBC, PSMD3, FCER1G, PSMD4, PAK1, PSMD8	1006	105	16792	2.86146	0.0156585
GO:0071902~positive regulation of protein serine/threonine kinase activity	10	0.880282	0.000163075	HSP90AB1, ACSL1, MAP2K2, SNCA, RHOA, CALM3, CALM2, CSF1R, CIB1, CALM1	1006	35	16792	4.7691	0.0158008
GO:0050690~regulation of defense response to virus by virus	9	0.792254	0.000169652	AP2A2, AP1M1, ARF1, FYN, AP2S1, HLA-A, ATP6V1H, AP2M1, B2M	1006	28	16792	5.36524	0.0160448
GO:0042542~response to hydrogen peroxide	12	1.05634	0.00017413	TXNIP, GPX1, DUSP1, CRYAB, PTK2B, JUN, HBA2, EEF2, CAT, HSPD1, HBA1, HBB	1006	51	16792	3.92749	0.016085
GO:0031623~receptor internalization	11	0.96831	0.000176591	CD9, RAB31, EZR, PICALM, TFRC, GRIA1, CD81, SNCA, FCER1G, ITGB2, RAMP1	1006	43	16792	4.27001	0.0159427
GO:0006446~regulation of translational initiation	10	0.880282	0.000205996	EIF3C, EIF4G1, EIF4B, EIF3CL, EIF3G, EIF5, EIF3F, EIF4A1, EIF3K, HSPB1	1006	36	16792	4.63662	0.018164
GO:0031396~regulation of protein ubiquitination	7	0.616197	0.000215557	HSP90AB1, HSP90AA1, FBXO2, PINK1, DNAJB2, HSPA1A, HSPA1B	1006	16	16792	7.30268	0.0185899
GO:0016241~regulation of macroautophagy	11	0.96831	0.00021641	ATP6V1C1, CAPNS1, SH3GLB1, ATP6V1E1, ATP6V1H, ATP6V1G2, ATP6V1B2, ATP6V0D1, ATP13A2, GAPDH, ATP6V1D	1006	44	16792	4.17296	0.0182694
GO:0031145~anaphase-promoting complex-dependent catabolic process	15	1.32042	0.000223295	ANAPC5, CDC16, PSMA1, PSMB4, PSMB1, PSMD11, PSMC3, PSME2, PSMB3, PSMC1, UBC, PSMD3, PSMD4, UBE2S, PSMD8	1006	79	16792	3.16934	0.0184562
GO:0030855~epithelial cell differentiation	14	1.23239	0.000229161	FGFR2, COL4A1, LGALS3, CNN3, TOLLIP, ALDOC, VDAC1, ACADVL, CBR1, TAGLN, TPP1, ID3, CTSB, PGK1	1006	70	16792	3.33837	0.0185536
GO:0007010~cytoskeleton organization	23	2.02465	0.000243014	ACTB, PALM, CCL2, TUBB2B, TUBB2A, SOX9, PALLD, TPM1, CAPZB, ELMO2, THY1, MAST3, MACF1, ANK2, APOE, SPTBN1, TUBA4A, MSN, ADD3, DST, TUBB3, TUBB4B, SPTAN1	1006	161	16792	2.38455	0.0192748
GO:0042130~negative regulation of T cell proliferation	10	0.880282	0.0002579	CEBPB, HLA-DRB1, HLA-DRB4, NDFIP1, HLA-DRB5, SDC4, GPNMB, VSIG4, HLA-G, DLG1	1006	37	16792	4.51131	0.0200467
GO:0051436~negative regulation of ubiquitin-protein ligase activity involved in mitotic cell cycle	14	1.23239	0.000265397	ANAPC5, CDC16, PSMB4, PSMA1, PSMB1, PSMD11, PSMC3, PSME2, PSMB3, PSMC1, UBC, PSMD3, PSMD4, PSMD8	1006	71	16792	3.29135	0.0202309
GO:0090263~positive regulation of canonical Wnt signaling pathway	19	1.67254	0.000274771	FGFR2, WLS, GPRC5B, PSMA1, PSMB4, PSMB1, SULF2, PSMD11, PSMC3, PSME2, PSMB3, UBR5, ILK, PSMC1, UBC, PSMD3, PSMD4, PSMD8, RNF146	1006	120	16792	2.64288	0.020547
GO:0048010~vascular endothelial growth factor receptor signaling pathway	14	1.23239	0.000306417	ACTB, HSP90AA1, CCL2, WASF2, ABI1, ELMO2, ACTG1, VEGFB, PTK2, FYN, PTK2B, RHOA, HSPB1, CYFIP1	1006	72	16792	3.24564	0.0224675
GO:0032355~response to estradiol	16	1.40845	0.000308574	TXNIP, ASS1, CRYAB, ADCYAP1R1, ANXA1, CST3, EEF2, CALR, GPI, NCOA1, DUSP1, CTGF, PTN, CAT, NR2F2, GSTP1	1006	91	16792	2.93483	0.0222171
GO:0030100~regulation of endocytosis	9	0.792254	0.000366841	STON2, PICALM, RAB5C, HIP1R, RAB4A, AP2S1, TSC2, RAB5A, BIN1	1006	31	16792	4.84602	0.0258928
GO:1901841~regulation of high voltage-gated calcium channel activity	5	0.440141	0.000385777	SRI, PDE4B, CALM3, CALM2, CALM1	1006	7	16792	11.9227	0.0267403
GO:2000427~positive regulation of apoptotic cell clearance	5	0.440141	0.000385777	CCL2, C4A, C4B_2, C4B, C3	1006	7	16792	11.9227	0.0267403
GO:0008285~negative regulation of cell proliferation	42	3.69718	0.000439214	RARRES3, IFITM1, IGFBP7, RBM5, ABI1, COPS8, TIMP2, FTH1, WARS, CD9, SERPINE2, PTK2B, NPM1, BRD7, MEG3, BCL6, GPNMB, CHD5, APC, CSF1R, CIB1, COL18A1, CTBP2, PHB, WDR6, FBXO2, S100A11, CSNK2B, TAX1BP3, SLC9A3R1, DDR1, SH3BP4, CDKN1A, NME1, JUN, TSC2, HGS, ADAMTS1, DNAJB2, PMP22, FABP7, IGFBP3	1006	396	16792	1.77035	0.0298723
GO:0010467~gene expression	11	0.96831	0.0004589	HNRNPM, HNRNPK, POLR2E, POLR2L, PCBP1, POLR2J, PCBP2, PTBP1, HNRNPC, HNRNPR, HNRNPU	1006	48	16792	3.82522	0.03067
GO:0046034~ATP metabolic process	9	0.792254	0.000463722	VCP, AK1, AK5, HSPA1A, HSPA1B, ATP6V1B2, ATP1A2, GUK1, HSPA8	1006	32	16792	4.69458	0.0304787
GO:0030168~platelet activation	18	1.58451	0.000478291	TYRO3, YWHAZ, GNA12, PRKCG, FLNA, PTPN11, CD9, PLSCR1, VWF, ARRB1, GP1BB, GNB1, FYN, MAPK3, RHOA, RHOB, FCER1G, GNG2	1006	115	16792	2.61264	0.0309143
GO:0038061~NIK/NF-kappaB signaling	13	1.14437	0.000483954	PSMB4, PSMA1, PSMB1, PSMC3, PSME2, PSMD11, PSMB3, UBE2M, PSMC1, UBC, PSMD3, PSMD4, PSMD8	1006	66	16792	3.28779	0.0307781
GO:0006915~apoptotic process	55	4.84155	0.000489355	MEF2C, SEPT4, S100A8, HIP1R, SNCA, S100A9, RBM5, BNIP3, EIF5A, GHITM, RAD21, NISCH, RHOB, PAK1, CIB1, PPP2R1A, SGK1, TFPT, SLC25A6, CST3, ELMO2, RNF130, C1QBP, ARRB1, CLIC4, MAPK3, GADD45A, CTSH, FAIM2, FGFR2, LITAF, TMEM219, RTKN, ITGB2, PEA15, PRUNE2, UBE2D3, CSE1L, PTK2B, SH3GLB1, DDX41, LGALS1, TGFBR2, CHI3L1, CAPN3, VDAC1, PRELID1, PLSCR1, IRF3, TIAF1, ZNF385A, APBB1, IGFBP3, CD14, PUF60	1006	567	16792	1.61914	0.0306299
GO:0045471~response to ethanol	17	1.49648	0.000492382	TUFM, RBP4, CCL2, S100A8, ADCYAP1R1, MAOB, RPL15, EEF2, SPARC, HAMP, FYN, PTK2B, CAT, RPL10A, SDF4, CD14, GSTP1	1006	105	16792	2.70249	0.0303424
GO:0022617~extracellular matrix disassembly	14	1.23239	0.000528898	KLK7, A2M, BSG, CAPNS1, FLOT1, BCAN, DCN, TIMP2, CAPN2, TIMP1, CD44, GSN, SPP1, FN1	1006	76	16792	3.07481	0.0320634
GO:0051437~positive regulation of ubiquitin-protein ligase activity involved in regulation of mitotic cell cycle transition	14	1.23239	0.000528898	ANAPC5, CDC16, PSMB4, PSMA1, PSMB1, PSMD11, PSMC3, PSME2, PSMB3, PSMC1, UBC, PSMD3, PSMD4, PSMD8	1006	76	16792	3.07481	0.0320634
GO:0001934~positive regulation of protein phosphorylation	19	1.67254	0.000555598	C3, AIF1, ERP29, FLOT1, PINK1, IL34, SOX9, ANXA2, PTK2, CCND3, ARRB1, CCND2, NTRK2, MAPK3, CLIP3, PAK1, GPNMB, CIB1, CSF1R	1006	127	16792	2.49721	0.0331536
GO:0051259~protein oligomerization	12	1.05634	0.000567306	IRAK1, MLC1, PFKL, SH3GLB1, NBR1, TRIM28, NPM1, CAMK2D, CHP1, TMED10, GRHPR, AHNAK	1006	58	16792	3.45349	0.0333439
GO:0006412~translation	30	2.64085	0.000595243	RPL18, RPL13, RPL15, RPL35, RPS15A, RPS2, WARS, RPLP0, RPL8, RPL3, FAU, RPL10, RPL11, RPL10A, RPL12, SARS, SLC25A6, RPS9, RPS6, RPS5, RPL29, RPS7, EIF4G1, SLC25A11, RPS19, RPS16, RPL18A, RPL13A, NHP2, SLC25A18	1006	253	16792	1.97927	0.0344522
GO:0051493~regulation of cytoskeleton organization	7	0.616197	0.000625417	PTK2, S100A8, CLIC4, PLXNB1, MAPK3, S100A9, CAPN2	1006	19	16792	6.14963	0.0356526
GO:0010881~regulation of cardiac muscle contraction by regulation of the release of sequestered calcium ion	7	0.616197	0.000625417	ANK2, CAMK2D, CALM3, ASPH, ATP1A2, CALM2, CALM1	1006	19	16792	6.14963	0.0356526
GO:0061621~canonical glycolysis	8	0.704225	0.000648126	GPI, TPI1, PFKL, ALDOC, PFKP, PGK1, GAPDH, ENO1	1006	26	16792	5.13595	0.0364056
GO:0030198~extracellular matrix organization	25	2.2007	0.00067504	GFAP, ITGB4, DAG1, BCAN, ITGB2, DCN, SOX9, TTR, PTK2, CD44, TNR, SPP1, FN1, COL18A1, BSG, COL4A2, COL4A1, ICAM2, SPARC, CSGALNACT1, VWF, DDR1, ITGA7, VCAN, NCAN	1006	196	16792	2.12906	0.0373653
GO:0007566~embryo implantation	10	0.880282	0.000706054	DDR1, BSG, IGFBP7, TRIM28, TGFBR2, CST3, H3F3A, H3F3B, SPP1, RPL29	1006	42	16792	3.97425	0.0385169
GO:0009725~response to hormone	10	0.880282	0.000706054	TUB, SNRPN, PTK2B, HCLS1, H3F3A, H3F3B, TIMP2, ACAT1, SNURF, TIMP1	1006	42	16792	3.97425	0.0385169
GO:0006986~response to unfolded protein	10	0.880282	0.000706054	HSPA1L, HSP90AB1, HSP90AA1, DNAJA1, HSPB1, DNAJB2, HSPD1, DNAJB1, UBXN4, HSPA8	1006	42	16792	3.97425	0.0385169
GO:0032872~regulation of stress-activated MAPK cascade	5	0.440141	0.000734977	MAP2K2, NBR1, MAPK3, PRDX1, GSTP1	1006	8	16792	10.4324	0.0395255
GO:1901844~regulation of cell communication by electrical coupling involved in cardiac conduction	5	0.440141	0.000734977	SRI, CAMK2D, CALM3, CALM2, CALM1	1006	8	16792	10.4324	0.0395255
GO:0030036~actin cytoskeleton organization	19	1.67254	0.000736735	ABR, RAN, WASF2, TMSB10, SLC9A3R1, PALLD, CAPZB, DAAM2, ARPC1A, CORO1C, PFN1, CORO1A, NISCH, RHOA, FLII, BCL6, PAFAH1B1, CAP1, ADD1	1006	130	16792	2.43958	0.0390934
GO:0016192~vesicle-mediated transport	21	1.84859	0.000746269	GDI2, AP1M1, STX1A, CLTB, MLC1, KIF5A, AP2S1, CPNE6, RAB1A, ERGIC3, AP2A2, PICALM, VAMP8, ACTR1A, TSC2, AP3B2, RAB14, SYTL2, VAMP3, CPNE3, AP2M1	1006	152	16792	2.30611	0.0390719
GO:0070374~positive regulation of ERK1 and ERK2 cascade	23	2.02465	0.000779577	FGFR2, HMGB1, CCL2, MAP2K2, ATP6AP1, PHB, CHI3L1, CD74, MIF, PTPN11, VEGFB, CD44, ARRB1, CTGF, PTK2B, JUN, MAPK3, CAMK2D, PDGFRA, FGF1, GPNMB, CIB1, CSF1R	1006	175	16792	2.19379	0.0402548
GO:0010976~positive regulation of neuron projection development	15	1.32042	0.000785715	PLXNB2, ENC1, PLXNB3, DPYSL3, SNX3, GPRC5B, SERPINF1, FYN, PTK2B, NME1, NTRK2, CNTN1, PTN, RANBP1, APBB1	1006	89	16792	2.81323	0.0400492
GO:0045429~positive regulation of nitric oxide biosynthetic process	10	0.880282	0.000846206	HSP90AB1, HSP90AA1, ASS1, AIF1, PTK2B, AGT, CLU, ITGB2, KLF2, HBB	1006	43	16792	3.88183	0.0425263
GO:0072583~clathrin-mediated endocytosis	7	0.616197	0.000848551	AP2A2, CLTB, PICALM, HIP1R, AP2S1, CANX, AP2M1	1006	20	16792	5.84215	0.0421134
GO:0001525~angiogenesis	27	2.37676	0.000867916	FGFR2, CCL2, WASF2, WARS, PTK2, PTK2B, CTGF, RHOB, FGF1, RAMP1, ANGPTL4, CIB1, FN1, COL18A1, SRPK2, COL4A2, EPAS1, MCAM, PNPLA6, ANXA2, THY1, VEGFB, GPI, CLIC4, ID1, JUN, PDCD6	1006	223	16792	2.02099	0.0425273
GO:0033572~transferrin transport	9	0.792254	0.000884466	ATP6V1C1, TFRC, ATP6AP1, ATP6V1E1, ATP6V1H, ATP6V1G2, ATP6V1B2, ATP6V0D1, ATP6V1D	1006	35	16792	4.29219	0.0427975
GO:0008380~RNA splicing	22	1.93662	0.000935992	SRPK2, PPP2R1A, LGALS3, SNRPN, DDX39B, PTBP1, RBM5, SAP18, WBP11, MBNL2, SNURF, SF3B2, SRSF2, SRSF7, C1QBP, RBM8A, PRPF8, SNRPB, LSM4, HNRNPC, RBM39, PUF60	1006	166	16792	2.21217	0.0446956
GO:0043388~positive regulation of DNA binding	8	0.704225	0.00105042	HMGB1, NME1, TRIM28, HIPK2, CALM3, EDF1, CALM2, CALM1	1006	28	16792	4.7691	0.049436

[truncated: 5 more sheets: Process 5 G5<-0.01, Process 6 G6>0.01, Process 6 G6<-0.01, Process 7 G7>0.01, Process 7 G7<-0.01]
