# Supplementary material for: Exploring Alzheimer’s Disease Molecular Variability via Calculation of Personalized Transcriptional Signatures
Source: Biomolecules. 2020 Mar 26;10(4):503. doi: 10.3390/biom10040503 (PMC7226317; doi:10.3390/biom10040503)
Supplement: Supplementary file 1 [file biomolecules-10-00503-s001.zip › suppl/Supp Table 3.xlsx]

## Sheet: amplitudes for each process
sample	Source name	Neuropathological category	Brain Region	age	Subject ID	steady state	unbalanced process 1	unbalanced process 2	unbalanced process 3	unbalanced process 4	unbalanced process 5	unbalanced process 6	unbalanced process 7		legend for amplitude values
1	GSM2233622	neuropathological category: Normal	brain region: Frontal Pole	60	subject id: 1018	567.328	28.9316	17.2247	16.1619	7.38365	4.95027	5.6699	-4.83014			l(k)>24
2	GSM2233682	neuropathological category: Normal	brain region: Frontal Pole	62	subject id: 990	563.884	25.9527	12.7244	18.8154	10.2821	0.503072	-2.36965	4.7323			l(k)>-24
3	GSM2233669	neuropathological category: Normal	brain region: Frontal Pole	66	subject id: 843	555.335	-11.9476	-33.9347	11.0388	5.52167	12.1785	-8.12827	-7.99935
4	GSM2233648	neuropathological category: Normal	brain region: Frontal Pole	69	subject id: 495	560.488	10.0111	-45.237	3.58984	7.91731	3.259	0.644896	-2.73757
5	GSM2233676	neuropathological category: Normal	brain region: Frontal Pole	69	subject id: 923	562.929	13.5535	-9.33981	7.45456	3.90137	3.73329	-1.56388	-2.46742
6	GSM2233628	neuropathological category: Normal	brain region: Frontal Pole	70	subject id: 2010	563.499	14.4694	-19.9124	0.260269	2.28851	8.61419	12.4352	0.00331086
7	GSM2233649	neuropathological category: Normal	brain region: Frontal Pole	82	subject id: 523	567.389	28.5395	20.0319	16.6551	-0.810446	-5.14197	5.45289	6.08565
8	GSM2233668	neuropathological category: Normal	brain region: Frontal Pole	83	subject id: 842	567.175	13.3545	9.17957	6.19196	-2.14837	6.24511	-5.96735	-2.11694
9	GSM2233625	neuropathological category: Normal	brain region: Frontal Pole	85	subject id: 1039	562.273	7.1999	21.935	14.5929	0.982727	4.71051	-0.231029	1.54321
10	GSM2233650	neuropathological category: Normal	brain region: Frontal Pole	85	subject id: 551	571.046	43.9494	-11.0502	-3.64426	11.7429	6.99411	-5.51305	0.212893
11	GSM2233665	neuropathological category: Normal	brain region: Frontal Pole	86	subject id: 82	566.554	32.5153	4.63404	8.18995	7.91018	-2.45496	1.36155	6.18616
12	GSM2233664	neuropathological category: Normal	brain region: Frontal Pole	89	subject id: 800	565.282	20.7123	-24.6676	-8.81539	5.34422	7.27952	-13.3559	5.39737
13	GSM2233661	neuropathological category: Normal	brain region: Frontal Pole	95	subject id: 776	556.524	2.91093	-40.7437	8.40783	8.56651	4.90146	-7.28209	-0.829654
14	GSM2233630	neuropathological category: Normal	brain region: Frontal Pole	96	subject id: 230	562.086	24.6836	-29.0973	8.34361	8.93538	1.30779	-5.35391	-23.8328
15	GSM2233656	neuropathological category: Normal	brain region: Frontal Pole	102	subject id: 625	562.237	2.49417	-13.2117	8.30799	1.85455	12.7752	0.88758	-6.81884
16	GSM2233667	neuropathological category: Possible AD	brain region: Frontal Pole	64	subject id: 836	563.343	35.558	-28.3084	4.9411	15.5536	2.95742	-2.31248	1.39293
17	GSM2233670	neuropathological category: Possible AD	brain region: Frontal Pole	79	subject id: 865	562.136	11.8042	8.54804	19.5715	0.795605	-2.52094	1.0507	3.33105
18	GSM2233654	neuropathological category: Possible AD	brain region: Frontal Pole	82	subject id: 618	569.199	41.0396	-27.76	-16.8249	5.50203	-18.4485	-11.5696	15.0513
19	GSM2233677	neuropathological category: Possible AD	brain region: Frontal Pole	83	subject id: 940	554.33	-10.1918	5.18539	21.236	-4.12298	-1.88353	11.6374	-9.35675
20	GSM2233657	neuropathological category: Possible AD	brain region: Frontal Pole	86	subject id: 639	560.581	14.7372	-40.1127	-4.48018	5.06511	-6.10404	-6.67601	0.0224417
21	GSM2233678	neuropathological category: Possible AD	brain region: Frontal Pole	88	subject id: 941	557.457	3.26748	7.38575	25.4338	3.77423	-0.584599	-2.53165	-0.389001
22	GSM2233675	neuropathological category: Possible AD	brain region: Frontal Pole	89	subject id: 914	565.862	24.3314	3.57321	12.4977	-1.79402	2.58331	1.49509	-10.0099
23	GSM2233666	neuropathological category: Possible AD	brain region: Frontal Pole	90	subject id: 83	575.108	53.6356	3.57447	-6.75745	6.50439	2.22877	-5.53434	5.94342
24	GSM2233674	neuropathological category: Possible AD	brain region: Frontal Pole	90	subject id: 892	566.215	18.3651	39.4535	23.0608	-8.60239	-16.3871	-3.58504	6.87003
25	GSM2233646	neuropathological category: Possible AD	brain region: Frontal Pole	91	subject id: 480	566.562	31.4993	-34.1481	-2.9145	7.40752	-4.62475	3.39126	-1.75611
26	GSM2233653	neuropathological category: Possible AD	brain region: Frontal Pole	91	subject id: 616	551.59	4.28759	-42.4495	13.679	15.4417	0.630666	-16.091	12.6195
27	GSM2233621	neuropathological category: Possible AD	brain region: Frontal Pole	98	subject id: 1006	567.358	14.5841	12.4	10.9733	0.342225	10.8325	-1.01143	-9.67382
28	GSM2233631	neuropathological category: Possible AD	brain region: Frontal Pole	99	subject id: 234	574.169	31.7151	22.5662	0.731607	3.28557	19.1563	14.88	-9.52531
29	GSM2233681	neuropathological category: Probable AD	brain region: Frontal Pole	79	subject id: 988	569.335	24.196	22.0641	6.5013	-0.763773	2.56512	4.15433	-4.10519
30	GSM2233624	neuropathological category: Probable AD	brain region: Frontal Pole	80	subject id: 1027	565.388	15.0513	21.7576	22.0334	-4.74218	11.5667	-1.03564	-17.692
31	GSM2233636	neuropathological category: Probable AD	brain region: Frontal Pole	83	subject id: 340	564.665	0.636936	19.7699	17.7076	-10.4076	5.95452	-2.67914	-18.6137
32	GSM2233659	neuropathological category: Probable AD	brain region: Frontal Pole	84	subject id: 752	544.547	-17.93	-61.9704	19.539	10.1299	-4.8452	-6.87991	-1.4022
33	GSM2233627	neuropathological category: Probable AD	brain region: Frontal Pole	86	subject id: 184	573.05	31.7138	2.95379	-0.524092	-5.80069	5.16501	3.03049	-21.5285
34	GSM2233673	neuropathological category: Probable AD	brain region: Frontal Pole	90	subject id: 882	549.656	3.67194	-57.0613	17.9571	16.529	-1.17609	-1.79233	0.443827
35	GSM2233679	neuropathological category: Probable AD	brain region: Frontal Pole	90	subject id: 963	558.143	7.20316	-6.24022	27.894	5.50051	1.02474	0.94623	-11.0865
36	GSM2233626	neuropathological category: Probable AD	brain region: Frontal Pole	93	subject id: 111	561.52	19.3946	1.82099	34.4016	2.84991	-3.35352	1.25939	-9.4379
37	GSM2233639	neuropathological category: Probable AD	brain region: Frontal Pole	93	subject id: 367	555.476	-12.0616	-42.2846	5.30464	-2.95156	-3.74999	0.361548	-6.61937
38	GSM2233671	neuropathological category: Probable AD	brain region: Frontal Pole	93	subject id: 869	564.407	4.21409	-2.74342	-4.7646	-1.42294	2.45309	-21.4559	4.56152
39	GSM2233652	neuropathological category: Probable AD	brain region: Frontal Pole	95	subject id: 592	567.063	15.5814	11.0255	12.1146	5.7681	16.9218	17.7347	6.05678
40	GSM2233634	neuropathological category: definite AD	brain region: Frontal Pole	64	subject id: 316	554.294	-12.1584	-47.1452	5.79808	5.77919	2.98692	1.75398	-4.21193
41	GSM2233663	neuropathological category: definite AD	brain region: Frontal Pole	73	subject id: 790	541.478	-63.4982	-10.2676	27.8874	-4.84568	3.21128	-25.9819	-9.52148
42	GSM2233642	neuropathological category: definite AD	brain region: Frontal Pole	80	subject id: 427	570.726	42.0048	17.3345	5.53134	16.458	15.9382	5.4615	5.24307
43	GSM2233643	neuropathological category: definite AD	brain region: Frontal Pole	83	subject id: 451	560.787	1.99262	16.5003	20.4094	1.01309	8.0726	4.29484	-6.03253
44	GSM2233637	neuropathological category: definite AD	brain region: Frontal Pole	84	subject id: 347	569.004	33.1395	-20.0844	-2.30195	11.9625	8.44618	-10.1684	-7.08169
45	GSM2233638	neuropathological category: definite AD	brain region: Frontal Pole	84	subject id: 364	564.29	8.76839	-12.6914	4.6623	6.16816	9.50475	-11.8278	-1.95478
46	GSM2233644	neuropathological category: definite AD	brain region: Frontal Pole	84	subject id: 457	556.258	16.9653	-45.4602	7.90143	15.4298	-14.0146	2.03158	12.185
47	GSM2233655	neuropathological category: definite AD	brain region: Frontal Pole	85	subject id: 623	568.683	30.1282	-50.1406	-27.1338	3.39716	-5.78285	-21.8048	-2.15563
48	GSM2233672	neuropathological category: definite AD	brain region: Frontal Pole	85	subject id: 870	558.353	26.5475	-47.9306	1.61001	12.398	-9.77122	1.62791	2.37617
49	GSM2233641	neuropathological category: definite AD	brain region: Frontal Pole	87	subject id: 375	565.786	18.7838	-6.51526	2.1221	5.89399	13.8932	0.168376	-2.82728
50	GSM2233645	neuropathological category: definite AD	brain region: Frontal Pole	87	subject id: 462	559.511	11.2606	-29.8297	7.23441	14.6642	2.99998	-8.95914	5.11923
51	GSM2233647	neuropathological category: definite AD	brain region: Frontal Pole	87	subject id: 488	562.132	8.03505	-7.67459	17.2037	6.32862	19.9718	15.3314	-7.39555
52	GSM2233660	neuropathological category: definite AD	brain region: Frontal Pole	87	subject id: 755	564.142	22.6856	-12.0734	4.57828	6.15488	12.0684	2.97121	-4.71415
53	GSM2233683	neuropathological category: definite AD	brain region: Frontal Pole	88	subject id: 992	552.936	-27.591	-3.92057	14.0629	-2.8724	6.82771	-2.00026	-4.18076
54	GSM2233651	neuropathological category: definite AD	brain region: Frontal Pole	89	subject id: 571	570.932	26.3036	-1.12591	-14.4617	3.2484	9.71763	2.19494	6.95054
55	GSM2233658	neuropathological category: definite AD	brain region: Frontal Pole	89	subject id: 66	565.416	13.2873	-24.6865	-22.0951	3.60645	5.04158	11.8499	4.02413
56	GSM2233680	neuropathological category: definite AD	brain region: Frontal Pole	90	subject id: 975	550.831	-28.1109	-5.8299	19.0598	4.35478	13.1943	-8.36134	-8.99597
57	GSM2233629	neuropathological category: definite AD	brain region: Frontal Pole	91	subject id: 215	566.546	9.47677	5.40571	-4.36201	0.0901313	8.06237	2.50423	1.30253
58	GSM2233623	neuropathological category: definite AD	brain region: Frontal Pole	92	subject id: 1023	566.193	6.04821	16.1425	11.2033	-5.09736	6.18829	-0.155116	-9.93291
59	GSM2233633	neuropathological category: definite AD	brain region: Frontal Pole	92	subject id: 273	564.012	14.4386	-12.8298	11.2895	6.88831	8.18697	0.696169	-5.87785
60	GSM2233635	neuropathological category: definite AD	brain region: Frontal Pole	94	subject id: 332	575.804	40.8603	8.57301	-14.0522	7.99614	10.0169	0.534726	9.38237
61	GSM2233662	neuropathological category: definite AD	brain region: Frontal Pole	95	subject id: 786	561.06	9.39143	-42.0317	-4.94872	2.13367	7.91366	3.54921	0.931948
62	GSM2233632	neuropathological category: definite AD	brain region: Frontal Pole	99	subject id: 256	571.961	25.9851	15.2339	3.04588	-9.10687	-2.90841	-9.20894	-10.7252
63	GSM2233640	neuropathological category: definite AD	brain region: Frontal Pole	100	subject id: 370	562.236	-4.51002	15.1041	20.5303	-9.77071	5.21488	-8.50016	-14.9796
64	GSM2233723	neuropathological category: Normal	brain region: Occipital Visual Cortex	66	subject id: 843	540.696	-14.8473	-59.4325	14.4725	2.12451	-16.3924	5.02694	2.91132
65	GSM2233698	neuropathological category: Normal	brain region: Occipital Visual Cortex	69	subject id: 495	556.072	-2.45005	-22.6182	-11.352	-10.7875	-9.19773	8.19292	-11.9338
66	GSM2233731	neuropathological category: Normal	brain region: Occipital Visual Cortex	69	subject id: 923	553.979	6.78292	-16.7822	9.02269	-4.46878	-15.2875	3.34523	-3.72961
67	GSM2233688	neuropathological category: Normal	brain region: Occipital Visual Cortex	70	subject id: 2010	564.361	22.5304	-18.328	-7.46845	0.700224	7.45353	9.86066	-17.3478
68	GSM2233734	neuropathological category: Normal	brain region: Occipital Visual Cortex	74	subject id: 972	548.103	3.34478	-44.6537	7.01771	-1.47681	-19.7171	0.798473	-10.4392
69	GSM2233701	neuropathological category: Normal	brain region: Occipital Visual Cortex	82	subject id: 523	551.151	-0.63599	-23.2283	16.0746	-5.2149	-15.6767	14.3029	-1.90432
70	GSM2233722	neuropathological category: Normal	brain region: Occipital Visual Cortex	83	subject id: 842	551.251	6.01509	-30.9593	10.5434	-0.603271	-13.8175	-2.29692	-8.6947
71	GSM2233711	neuropathological category: Normal	brain region: Occipital Visual Cortex	84	subject id: 684	542.122	-35.3146	-25.1959	8.86178	1.14591	-6.95576	-7.18986	15.3549
72	GSM2233702	neuropathological category: Normal	brain region: Occipital Visual Cortex	85	subject id: 551	552.755	14.1064	-20.9336	19.4809	1.35956	-17.7595	3.22153	-6.38963
73	GSM2233718	neuropathological category: Normal	brain region: Occipital Visual Cortex	86	subject id: 82	562.413	23.5348	-10.1914	-9.63442	-5.51849	-15.6394	3.11292	-5.30289
74	GSM2233716	neuropathological category: Normal	brain region: Occipital Visual Cortex	89	subject id: 800	556.509	20.4379	-40.365	-8.02025	4.04658	-9.48228	-3.79766	-1.11374
75	GSM2233715	neuropathological category: Normal	brain region: Occipital Visual Cortex	95	subject id: 776	556.502	-1.02783	-20.508	0.531061	-12.1154	-10.5258	1.72876	-9.56937
76	GSM2233706	neuropathological category: Normal	brain region: Occipital Visual Cortex	102	subject id: 625	531.812	-42.8403	-28.7679	37.9394	7.87222	-7.35577	9.43333	8.93553
77	GSM2233721	neuropathological category: Possible AD	brain region: Occipital Visual Cortex	64	subject id: 836	554.717	12.0753	-37.4297	-4.09432	-8.63464	-18.0472	2.44236	-7.29108
78	GSM2233724	neuropathological category: Possible AD	brain region: Occipital Visual Cortex	79	subject id: 865	563.43	24.1929	-1.9533	0.610765	-20.3747	-25.5396	0.159093	-11.8995
79	GSM2233705	neuropathological category: Possible AD	brain region: Occipital Visual Cortex	82	subject id: 618	554.538	13.2363	8.52085	27.4317	-8.41392	-27.0177	2.17652	-4.8779
80	GSM2233717	neuropathological category: Possible AD	brain region: Occipital Visual Cortex	82	subject id: 804	556.401	9.76554	7.25731	17.0538	-12.35	-26.86	-1.99115	-4.47339
81	GSM2233708	neuropathological category: Possible AD	brain region: Occipital Visual Cortex	86	subject id: 639	552.698	2.15021	-19.4745	5.61724	1.4612	-0.168881	8.96988	-11.8826
82	GSM2233732	neuropathological category: Possible AD	brain region: Occipital Visual Cortex	88	subject id: 941	544.607	-31.7217	-10.9632	24.046	-10.5179	-7.49493	2.88538	0.0931388
83	GSM2233730	neuropathological category: Possible AD	brain region: Occipital Visual Cortex	89	subject id: 914	562.995	25.2063	-4.09461	9.03301	-6.12443	-11.5112	3.03362	-15.9992
84	GSM2233719	neuropathological category: Possible AD	brain region: Occipital Visual Cortex	90	subject id: 83	558.637	10.822	-16.9613	1.171	-5.05697	-1.38345	7.94399	-23.0241
85	GSM2233729	neuropathological category: Possible AD	brain region: Occipital Visual Cortex	90	subject id: 892	558.867	18.7175	21.5985	17.7414	-7.69898	-25.7855	4.57479	10.3061
86	GSM2233697	neuropathological category: Possible AD	brain region: Occipital Visual Cortex	91	subject id: 480	555.177	24.362	-34.669	12.6776	8.58887	-9.47475	9.74853	-9.34438
87	GSM2233727	neuropathological category: Possible AD	brain region: Occipital Visual Cortex	91	subject id: 879	552.602	17.5419	-12.7837	17.7775	-2.91063	-26.2682	2.56112	-1.71068
88	GSM2233735	neuropathological category: Possible AD	brain region: Occipital Visual Cortex	96	subject id: 973	557.472	11.0566	-21.8525	1.59597	-11.3842	-10.3209	3.30888	-9.32071
89	GSM2233684	neuropathological category: Possible AD	brain region: Occipital Visual Cortex	98	subject id: 1006	561.74	16.3284	10.8472	6.62963	-17.0756	-16.0896	-3.37771	-19.9376
90	GSM2233690	neuropathological category: Possible AD	brain region: Occipital Visual Cortex	99	subject id: 234	561.644	38.5739	-16.9244	-3.11779	-1.3881	-26.3249	1.4941	3.62973
91	GSM2233736	neuropathological category: Probable AD	brain region: Occipital Visual Cortex	79	subject id: 988	557.332	18.0318	14.8149	19.5193	0.185909	-15.6194	7.50845	8.81977
92	GSM2233714	neuropathological category: Probable AD	brain region: Occipital Visual Cortex	84	subject id: 750	560.383	25.1485	21.5139	18.2022	-10.1045	-28.4412	4.40495	1.6229
93	GSM2233699	neuropathological category: Probable AD	brain region: Occipital Visual Cortex	85	subject id: 504	551.551	13.2896	1.82149	24.7044	-3.10372	-28.9752	-11.1845	2.61762
94	GSM2233687	neuropathological category: Probable AD	brain region: Occipital Visual Cortex	86	subject id: 184	554.025	4.52483	-37.9336	-5.31178	-9.88679	-14.1979	11.6495	-8.57902
95	GSM2233720	neuropathological category: Probable AD	brain region: Occipital Visual Cortex	88	subject id: 831	539.591	-33.8773	-41.2016	10.3311	0.470867	-5.95903	5.86609	2.12709
96	GSM2233728	neuropathological category: Probable AD	brain region: Occipital Visual Cortex	90	subject id: 882	561.411	23.9159	-25.213	-7.24218	-4.73828	-8.19237	-4.67657	-12.5658
97	GSM2233710	neuropathological category: Probable AD	brain region: Occipital Visual Cortex	92	subject id: 665	551.92	-2.74094	10.6203	33.1331	-19.7947	-32.937	-0.277011	-8.5663
98	GSM2233725	neuropathological category: Probable AD	brain region: Occipital Visual Cortex	93	subject id: 869	544.453	-24.332	-37.857	9.22866	-3.63083	-7.32983	-4.03756	-7.65677
99	GSM2233733	neuropathological category: Probable AD	brain region: Occipital Visual Cortex	93	subject id: 956	557.906	20.8774	7.37335	17.6981	-4.18833	-23.47	4.55719	6.67648
100	GSM2233713	neuropathological category: Probable AD	brain region: Occipital Visual Cortex	94	subject id: 709	558.409	5.46917	12.1835	23.2041	-20.8368	-27.4656	-5.36684	-18.0583
101	GSM2233704	neuropathological category: Probable AD	brain region: Occipital Visual Cortex	95	subject id: 592	546.501	4.51497	-50.7357	11.1645	2.67535	-25.4302	7.34806	-3.45305
102	GSM2233712	neuropathological category: Probable AD	brain region: Occipital Visual Cortex	100	subject id: 697	549.53	-34.4767	-2.7927	14.5338	-17.5471	-13.0218	6.62892	-3.31169
103	GSM2233693	neuropathological category: definite AD	brain region: Occipital Visual Cortex	80	subject id: 427	549.159	14.5843	-53.2285	10.4751	11.9576	-16.5355	8.05573	3.94896
104	GSM2233694	neuropathological category: definite AD	brain region: Occipital Visual Cortex	83	subject id: 451	556.367	0.228923	11.3904	6.2809	-3.99121	-6.73886	7.26324	6.37957
105	GSM2233695	neuropathological category: definite AD	brain region: Occipital Visual Cortex	84	subject id: 457	561.139	26.8266	7.21992	4.58464	-0.385339	-18.4232	3.53369	10.7417
106	GSM2233726	neuropathological category: definite AD	brain region: Occipital Visual Cortex	85	subject id: 870	555.282	-8.98099	-19.786	-7.78173	-11.7659	-6.443	5.47912	-8.95058
107	GSM2233692	neuropathological category: definite AD	brain region: Occipital Visual Cortex	87	subject id: 375	537.711	-6.91476	-62.6774	26.1452	14.3576	-19.4508	7.45537	6.54977
108	GSM2233696	neuropathological category: definite AD	brain region: Occipital Visual Cortex	87	subject id: 462	559.687	24.5163	-10.1188	3.74186	1.22384	-13.1057	-0.832565	1.47621
109	GSM2233707	neuropathological category: definite AD	brain region: Occipital Visual Cortex	88	subject id: 626	536.123	-54.8756	-6.45143	38.7487	-16.7053	-23.5835	0.341332	2.10933
110	GSM2233703	neuropathological category: definite AD	brain region: Occipital Visual Cortex	89	subject id: 571	541.263	-5.92058	-56.0155	19.3024	12.1533	-12.8366	2.51108	23.0857
111	GSM2233709	neuropathological category: definite AD	brain region: Occipital Visual Cortex	89	subject id: 66	558.055	19.5019	-25.0419	4.7586	-3.94769	-10.3716	11.1809	-17.7445
112	GSM2233689	neuropathological category: definite AD	brain region: Occipital Visual Cortex	91	subject id: 215	549.83	0.609669	-33.1762	7.50049	3.9736	-9.36261	6.8606	-5.33797
113	GSM2233685	neuropathological category: definite AD	brain region: Occipital Visual Cortex	92	subject id: 1023	562.053	6.45003	16.1171	5.38058	-30.5535	-23.0208	-6.43764	-19.6903
114	GSM2233686	neuropathological category: definite AD	brain region: Occipital Visual Cortex	94	subject id: 13	569.292	49.4234	-2.33675	-13.3484	-2.61983	-10.7297	13.0855	-2.13782
115	GSM2233691	neuropathological category: definite AD	brain region: Occipital Visual Cortex	94	subject id: 332	563.01	42.3845	-30.9933	-11.6861	3.92565	-12.7526	-2.59645	-7.89242
116	GSM2233700	neuropathological category: definite AD	brain region: Occipital Visual Cortex	94	subject id: 505	565.643	39.3728	-6.10851	-6.70738	0.846929	-13.2002	9.30795	5.07564
117	GSM2233739	neuropathological category: Normal	brain region: Inferior Temporal Gyrus	60	subject id: 1018	561.537	7.75192	2.14305	15.3003	4.42076	13.7955	2.92013	-9.38939
118	GSM2233794	neuropathological category: Normal	brain region: Inferior Temporal Gyrus	62	subject id: 990	558.28	4.04474	11.7774	24.5747	6.45363	7.39946	5.57126	3.51923
119	GSM2233779	neuropathological category: Normal	brain region: Inferior Temporal Gyrus	66	subject id: 843	559.158	5.70009	-36.3191	-1.09554	5.04138	9.31999	-8.22582	-5.20467
120	GSM2233762	neuropathological category: Normal	brain region: Inferior Temporal Gyrus	69	subject id: 495	558.007	-1.9908	-48.3118	1.81949	3.26575	4.71828	0.0939021	0.731667
121	GSM2233787	neuropathological category: Normal	brain region: Inferior Temporal Gyrus	69	subject id: 923	559.995	-4.67559	-9.39982	3.63449	-2.97822	10.5224	1.91534	-0.318481
122	GSM2233763	neuropathological category: Normal	brain region: Inferior Temporal Gyrus	82	subject id: 523	549.173	-4.87544	-53.0728	13.0638	12.8591	-3.24733	7.7768	12.8112
123	GSM2233778	neuropathological category: Normal	brain region: Inferior Temporal Gyrus	83	subject id: 842	557.293	-16.1849	-16.5226	8.60042	-2.03423	20.2644	4.70865	16.438
124	GSM2233742	neuropathological category: Normal	brain region: Inferior Temporal Gyrus	85	subject id: 1039	547.857	-17.7716	3.7731	31.3983	10.1716	23.1645	4.39831	17.6701
125	GSM2233764	neuropathological category: Normal	brain region: Inferior Temporal Gyrus	85	subject id: 551	565.379	18.1362	-3.86699	3.77011	0.640901	11.0036	-4.24554	-4.07479
126	GSM2233775	neuropathological category: Normal	brain region: Inferior Temporal Gyrus	86	subject id: 82	565.036	20.3557	3.87854	9.78805	4.22996	3.55628	9.63603	-3.04861
127	GSM2233774	neuropathological category: Normal	brain region: Inferior Temporal Gyrus	89	subject id: 800	537.488	-29.2454	-51.0129	33.5994	15.6524	-6.59555	-6.30002	6.57851
128	GSM2233772	neuropathological category: Normal	brain region: Inferior Temporal Gyrus	95	subject id: 776	543.869	-27.6068	-45.6015	21.2643	2.09579	-0.295902	-1.44052	-9.16914
129	GSM2233748	neuropathological category: Normal	brain region: Inferior Temporal Gyrus	96	subject id: 230	565.735	26.4687	-16.6601	1.361	6.98164	5.6994	-9.33216	-17.6427
130	GSM2233769	neuropathological category: Normal	brain region: Inferior Temporal Gyrus	102	subject id: 625	546.734	-33.2775	-26.2163	19.334	8.19864	13.9589	-1.5676	10.5279
131	GSM2233777	neuropathological category: Possible AD	brain region: Inferior Temporal Gyrus	64	subject id: 836	565.24	31.0529	-34.38	-12.205	3.89732	4.07845	-0.799625	-0.420684
132	GSM2233780	neuropathological category: Possible AD	brain region: Inferior Temporal Gyrus	79	subject id: 865	570.252	-0.859889	8.70669	-14.8169	-8.83573	18.1587	-4.0931	2.89293
133	GSM2233755	neuropathological category: Possible AD	brain region: Inferior Temporal Gyrus	82	subject id: 360	559.495	-22.3299	4.74342	9.5348	-9.80232	11.0471	-16.9185	-11.3536
134	GSM2233768	neuropathological category: Possible AD	brain region: Inferior Temporal Gyrus	82	subject id: 618	567.938	-4.67618	11.5314	-4.20302	-7.699	30.3033	19.5981	-5.73969
135	GSM2233788	neuropathological category: Possible AD	brain region: Inferior Temporal Gyrus	83	subject id: 940	549.696	-29.432	2.81303	28.6083	-8.48179	4.14242	14.541	-3.53133
136	GSM2233770	neuropathological category: Possible AD	brain region: Inferior Temporal Gyrus	86	subject id: 639	561.443	-10.052	-16.5345	-6.74146	-7.44487	17.6322	-2.68746	-4.14681
137	GSM2233789	neuropathological category: Possible AD	brain region: Inferior Temporal Gyrus	88	subject id: 941	566.763	1.27514	8.67731	-5.10577	-10.2543	13.1413	-1.8905	1.24634
138	GSM2233786	neuropathological category: Possible AD	brain region: Inferior Temporal Gyrus	89	subject id: 914	563.365	-12.2209	-6.32153	-5.78991	-14.1777	18.196	-4.42276	-7.55224
139	GSM2233776	neuropathological category: Possible AD	brain region: Inferior Temporal Gyrus	90	subject id: 83	566.921	16.93	-22.1217	-7.83488	1.03634	9.74754	-8.13951	-1.58172
140	GSM2233785	neuropathological category: Possible AD	brain region: Inferior Temporal Gyrus	90	subject id: 892	564.08	-7.85034	21.8423	8.32787	-26.2925	-18.8593	-3.65764	6.84413
141	GSM2233767	neuropathological category: Possible AD	brain region: Inferior Temporal Gyrus	91	subject id: 616	559.407	-22.9266	1.42401	2.72371	-8.92102	11.6874	-7.77562	2.44262
142	GSM2233783	neuropathological category: Possible AD	brain region: Inferior Temporal Gyrus	91	subject id: 879	560.917	2.62191	0.315933	4.64136	-6.18595	-3.64509	-0.7656	10.4478
143	GSM2233737	neuropathological category: Possible AD	brain region: Inferior Temporal Gyrus	98	subject id: 1006	557.766	-8.34638	2.95336	19.462	-0.737967	14.8664	7.58123	0.66211
144	GSM2233749	neuropathological category: Possible AD	brain region: Inferior Temporal Gyrus	99	subject id: 234	570.43	25.176	23.3364	7.76169	4.29664	24.1403	20.3344	-12.2741
145	GSM2233792	neuropathological category: Probable AD	brain region: Inferior Temporal Gyrus	79	subject id: 988	576.122	18.2556	26.8019	-13.9953	-8.05223	21.3407	5.27121	8.53218
146	GSM2233741	neuropathological category: Probable AD	brain region: Inferior Temporal Gyrus	80	subject id: 1027	556.501	-20.6064	4.83922	13.9422	-13.2157	7.56667	4.92028	-8.56003
147	GSM2233773	neuropathological category: Probable AD	brain region: Inferior Temporal Gyrus	81	subject id: 798	544.452	-48.2431	-4.03857	24.9198	-7.5065	5.88156	6.0307	3.7637
148	GSM2233746	neuropathological category: Probable AD	brain region: Inferior Temporal Gyrus	86	subject id: 184	555.554	0.166267	-37.6094	2.0253	-9.95324	-5.96532	12.2201	-12.0082
149	GSM2233784	neuropathological category: Probable AD	brain region: Inferior Temporal Gyrus	90	subject id: 882	561.431	6.80147	-41.8546	-11.4658	-1.18304	8.31481	-8.2013	-2.44127
150	GSM2233791	neuropathological category: Probable AD	brain region: Inferior Temporal Gyrus	90	subject id: 963	561.268	6.82639	5.79867	17.6162	2.29661	8.06371	-7.74796	-3.74647
151	GSM2233743	neuropathological category: Probable AD	brain region: Inferior Temporal Gyrus	93	subject id: 111	564.384	2.52442	18.6571	20.7044	-4.29988	9.45298	-3.8411	-9.44459
152	GSM2233781	neuropathological category: Probable AD	brain region: Inferior Temporal Gyrus	93	subject id: 869	554.532	-39.5185	-32.3558	-12.2301	-16.0165	13.9922	5.10802	2.36637
153	GSM2233790	neuropathological category: Probable AD	brain region: Inferior Temporal Gyrus	93	subject id: 956	561.186	7.15067	11.6719	17.5744	0.629762	-0.455454	-1.12363	15.4729
154	GSM2233766	neuropathological category: Probable AD	brain region: Inferior Temporal Gyrus	95	subject id: 592	567.134	14.6216	-12.407	-10.0445	-1.28569	10.6895	3.78477	7.47951
155	GSM2233738	neuropathological category: Probable AD	brain region: Inferior Temporal Gyrus	98	subject id: 1012	560.99	-21.4566	14.1272	4.21546	-16.7537	15.5986	18.6223	-1.66965
156	GSM2233752	neuropathological category: definite AD	brain region: Inferior Temporal Gyrus	64	subject id: 316	558.777	-23.2959	-31.5343	-8.17504	-1.86731	17.576	-1.90729	-2.53654
157	GSM2233745	neuropathological category: definite AD	brain region: Inferior Temporal Gyrus	72	subject id: 176	556.966	-54.6009	4.95416	-6.231	-25.2945	16.8087	11.266	4.87491
158	GSM2233793	neuropathological category: definite AD	brain region: Inferior Temporal Gyrus	73	subject id: 989	550.179	-36.1736	-16.3824	12.4075	-5.46645	18.8732	7.51369	-3.89771
159	GSM2233757	neuropathological category: definite AD	brain region: Inferior Temporal Gyrus	80	subject id: 427	571.23	15.3054	6.32446	-25.0127	-5.82997	15.0961	12.1159	9.63751
160	GSM2233758	neuropathological category: definite AD	brain region: Inferior Temporal Gyrus	83	subject id: 451	564.641	6.31803	0.853129	2.4242	-9.772	-3.07357	-4.82584	-10.221
161	GSM2233754	neuropathological category: definite AD	brain region: Inferior Temporal Gyrus	84	subject id: 347	565.316	-1.45044	-2.91494	-9.38089	-5.69564	13.363	-1.16454	4.16595
162	GSM2233759	neuropathological category: definite AD	brain region: Inferior Temporal Gyrus	84	subject id: 457	563.984	3.44101	8.32677	11.7863	4.37819	26.2596	21.7801	-3.16628
163	GSM2233782	neuropathological category: definite AD	brain region: Inferior Temporal Gyrus	85	subject id: 870	556.783	0.153333	-41.3921	-12.3314	-4.64249	4.86042	2.39665	-2.25095
164	GSM2233756	neuropathological category: definite AD	brain region: Inferior Temporal Gyrus	87	subject id: 375	565.028	-8.28965	-6.51601	-12.9977	-9.5518	17.2245	6.23884	7.02104
165	GSM2233760	neuropathological category: definite AD	brain region: Inferior Temporal Gyrus	87	subject id: 462	570.998	11.875	-4.82656	-20.3696	-0.574335	22.6183	-7.98946	-3.39748
166	GSM2233761	neuropathological category: definite AD	brain region: Inferior Temporal Gyrus	87	subject id: 488	555.96	-20.08	-48.1985	-4.15173	-4.27923	18.3334	6.52666	-16.9593
167	GSM2233765	neuropathological category: definite AD	brain region: Inferior Temporal Gyrus	89	subject id: 571	541.496	-22.5034	-37.0133	11.4691	10.2238	11.7618	17.4996	4.91719
168	GSM2233771	neuropathological category: definite AD	brain region: Inferior Temporal Gyrus	89	subject id: 66	563.62	13.8981	12.7511	15.3299	-0.0742101	4.7803	9.93667	12.3552
169	GSM2233747	neuropathological category: definite AD	brain region: Inferior Temporal Gyrus	91	subject id: 215	559.851	-9.73406	-25.9248	-7.41613	-8.94673	7.90887	3.25826	-1.40928
170	GSM2233740	neuropathological category: definite AD	brain region: Inferior Temporal Gyrus	92	subject id: 1023	565.309	-5.54038	19.3136	4.98439	-10.5624	15.4865	-6.3099	-10.1307
171	GSM2233751	neuropathological category: definite AD	brain region: Inferior Temporal Gyrus	92	subject id: 273	549.527	-32.6901	-15.1764	15.7389	1.52334	16.0779	1.80059	4.63715
172	GSM2233744	neuropathological category: definite AD	brain region: Inferior Temporal Gyrus	94	subject id: 13	563.233	25.4359	-36.1529	-9.64726	-1.78365	-1.04244	11.8494	-1.16222
173	GSM2233753	neuropathological category: definite AD	brain region: Inferior Temporal Gyrus	94	subject id: 332	566.964	37.3085	-24.8859	-12.2751	16.6774	12.2939	-12.9649	3.4749
174	GSM2233750	neuropathological category: definite AD	brain region: Inferior Temporal Gyrus	99	subject id: 256	567.062	-2.27413	18.0003	0.610976	-11.255	12.7129	-17.7869	-11.5332
175	GSM2233797	neuropathological category: Normal	brain region: Middle Temporal Gyrus	60	subject id: 1018	565.967	32.3362	9.18729	14.466	8.81266	16.8973	-2.17793	-2.07854
176	GSM2233852	neuropathological category: Normal	brain region: Middle Temporal Gyrus	62	subject id: 990	564.696	26.1043	17.6784	8.12513	5.13989	8.72429	4.39668	13.7043
177	GSM2233817	neuropathological category: Normal	brain region: Middle Temporal Gyrus	69	subject id: 495	557.954	11.0977	-43.0155	3.0923	3.24441	-0.875663	-2.07148	2.50375
178	GSM2233845	neuropathological category: Normal	brain region: Middle Temporal Gyrus	69	subject id: 923	561.516	6.00244	-9.90469	1.52801	-2.70534	8.43811	-0.608202	1.36594
179	GSM2233801	neuropathological category: Normal	brain region: Middle Temporal Gyrus	70	subject id: 2010	573.509	26.9451	3.15589	-25.7425	-10.5309	6.17477	15.2162	10.529
180	GSM2233819	neuropathological category: Normal	brain region: Middle Temporal Gyrus	82	subject id: 523	563.38	28.8092	-25.7078	-5.13174	5.52195	11.4671	2.85776	7.46365
181	GSM2233839	neuropathological category: Normal	brain region: Middle Temporal Gyrus	83	subject id: 842	544.81	-22.5899	-53.9511	18.718	0.331901	2.53075	16.9244	-6.5396
182	GSM2233799	neuropathological category: Normal	brain region: Middle Temporal Gyrus	85	subject id: 1039	562.32	3.79502	23.8519	14.1932	-4.48343	16.068	-3.59168	-1.06087
183	GSM2233820	neuropathological category: Normal	brain region: Middle Temporal Gyrus	85	subject id: 551	557.399	9.50991	-34.2626	2.85975	7.47524	0.804116	-1.03828	0.996617
184	GSM2233835	neuropathological category: Normal	brain region: Middle Temporal Gyrus	86	subject id: 82	568.693	24.1637	1.7299	-5.21951	-3.20474	17.4508	17.1202	0.902893
185	GSM2233834	neuropathological category: Normal	brain region: Middle Temporal Gyrus	89	subject id: 800	542.857	-14.273	-56.0944	24.702	14.8799	1.20772	-4.31149	4.5199
186	GSM2233832	neuropathological category: Normal	brain region: Middle Temporal Gyrus	95	subject id: 776	561.694	7.31455	-20.7761	-3.29108	-6.02186	2.59914	-12.5328	1.38063
187	GSM2233803	neuropathological category: Normal	brain region: Middle Temporal Gyrus	96	subject id: 230	566.127	21.5821	6.00453	1.45675	2.02998	14.4691	-2.23183	-3.27872
188	GSM2233826	neuropathological category: Normal	brain region: Middle Temporal Gyrus	102	subject id: 625	551.621	-24.873	-41.6879	-0.764945	1.14588	15.2408	-9.86871	-0.553169
189	GSM2233838	neuropathological category: Possible AD	brain region: Middle Temporal Gyrus	64	subject id: 836	553.955	14.7245	-47.9082	-2.79476	4.44353	-8.66232	3.09232	0.75306
190	GSM2233840	neuropathological category: Possible AD	brain region: Middle Temporal Gyrus	79	subject id: 865	568.406	9.39709	11.712	-7.42816	-5.83713	14.6608	-6.54831	3.49838
191	GSM2233824	neuropathological category: Possible AD	brain region: Middle Temporal Gyrus	82	subject id: 618	573.61	43.2726	-20.5763	-27.0055	0.961348	-4.84355	-20.3195	13.8085
192	GSM2233846	neuropathological category: Possible AD	brain region: Middle Temporal Gyrus	83	subject id: 940	559.023	-3.2235	9.13948	19.3442	-6.92852	6.42678	4.36344	-8.08174
193	GSM2233827	neuropathological category: Possible AD	brain region: Middle Temporal Gyrus	86	subject id: 639	556.004	-7.93452	-4.77594	16.5446	2.64992	14.1381	-1.2691	7.81096
194	GSM2233847	neuropathological category: Possible AD	brain region: Middle Temporal Gyrus	88	subject id: 941	565.06	-1.31409	17.1183	4.43109	-12.4248	12.8264	2.23816	2.26229
195	GSM2233844	neuropathological category: Possible AD	brain region: Middle Temporal Gyrus	89	subject id: 914	563.628	-0.985722	9.68817	4.14971	-14.5299	7.78293	1.63737	-2.3849
196	GSM2233836	neuropathological category: Possible AD	brain region: Middle Temporal Gyrus	90	subject id: 83	571.319	30.921	-3.37487	-10.5084	0.486063	8.24298	-7.74389	5.91722
197	GSM2233843	neuropathological category: Possible AD	brain region: Middle Temporal Gyrus	90	subject id: 892	564.28	4.66742	16.3595	9.57939	-15.6883	-3.0907	-2.80675	11.2702
198	GSM2233815	neuropathological category: Possible AD	brain region: Middle Temporal Gyrus	91	subject id: 480	567.234	35.1229	-15.1695	0.357349	8.80463	3.97663	3.27106	-1.73281
199	GSM2233823	neuropathological category: Possible AD	brain region: Middle Temporal Gyrus	91	subject id: 616	560.053	-1.30558	-45.0267	-25.6021	-5.01425	-2.80208	-30.5812	12.9092
200	GSM2233795	neuropathological category: Possible AD	brain region: Middle Temporal Gyrus	98	subject id: 1006	563.872	4.5191	18.9205	11.151	-11.1183	8.40627	2.24488	-2.36633
201	GSM2233804	neuropathological category: Possible AD	brain region: Middle Temporal Gyrus	99	subject id: 234	570.205	35.5817	5.81441	-1.07055	11.271	23.9248	10.1976	-1.26508
202	GSM2233850	neuropathological category: Probable AD	brain region: Middle Temporal Gyrus	79	subject id: 988	561.339	4.69032	0.96668	6.3471	0.611185	14.2771	11.3164	1.35124
203	GSM2233830	neuropathological category: Probable AD	brain region: Middle Temporal Gyrus	84	subject id: 750	558.91	-8.56999	9.75872	15.2624	-23.1591	-24.2642	-11.0784	7.76227
204	GSM2233818	neuropathological category: Probable AD	brain region: Middle Temporal Gyrus	85	subject id: 504	565.826	2.88141	22.8493	6.25589	-3.28586	17.4709	-13.4265	-5.46893
205	GSM2233837	neuropathological category: Probable AD	brain region: Middle Temporal Gyrus	88	subject id: 831	541.803	-35.0958	-52.3999	4.67313	0.749271	1.90617	0.597729	11.5023
206	GSM2233842	neuropathological category: Probable AD	brain region: Middle Temporal Gyrus	90	subject id: 882	566.186	1.73434	0.949743	-16.7705	-14.0979	12.211	-8.90561	-0.337845
207	GSM2233849	neuropathological category: Probable AD	brain region: Middle Temporal Gyrus	90	subject id: 963	559.427	7.83114	1.2038	17.6905	1.90941	7.34151	-3.43861	-2.84356
208	GSM2233829	neuropathological category: Probable AD	brain region: Middle Temporal Gyrus	92	subject id: 665	562.708	-18.1661	5.50346	-6.51047	-19.0891	12.2742	-18.7279	1.90398
209	GSM2233800	neuropathological category: Probable AD	brain region: Middle Temporal Gyrus	93	subject id: 111	564.403	2.5698	19.4902	17.556	-7.08781	14.5108	4.85792	-3.47783
210	GSM2233848	neuropathological category: Probable AD	brain region: Middle Temporal Gyrus	93	subject id: 956	566.154	14.6657	27.3838	12.7978	-22.2719	-19.1526	-12.6784	6.22319
211	GSM2233822	neuropathological category: Probable AD	brain region: Middle Temporal Gyrus	95	subject id: 592	567.638	6.14723	10.8762	-3.61635	-6.08665	12.9082	10.6211	10.0981
212	GSM2233796	neuropathological category: Probable AD	brain region: Middle Temporal Gyrus	98	subject id: 1012	565.485	17.0651	5.58313	6.85243	-7.15928	10.1069	2.74316	-0.452998
213	GSM2233807	neuropathological category: definite AD	brain region: Middle Temporal Gyrus	64	subject id: 316	543.317	-46.8444	-14.7197	19.0954	-5.48481	22.2832	22.1879	-13.7142
214	GSM2233851	neuropathological category: definite AD	brain region: Middle Temporal Gyrus	73	subject id: 989	548.255	-30.5957	-4.64938	22.4929	-7.62773	11.6298	12.4428	-4.72356
215	GSM2233811	neuropathological category: definite AD	brain region: Middle Temporal Gyrus	80	subject id: 427	555.287	16.2978	-41.0712	5.29502	12.7048	-7.04345	0.311982	17.2603
216	GSM2233812	neuropathological category: definite AD	brain region: Middle Temporal Gyrus	83	subject id: 451	565.277	-1.29118	19.1713	-0.0731694	-8.73985	21.8342	3.40286	-2.02459
217	GSM2233809	neuropathological category: definite AD	brain region: Middle Temporal Gyrus	84	subject id: 347	564.738	13.6937	0.790867	5.42778	-0.605907	18.3035	2.34157	-5.92544
218	GSM2233813	neuropathological category: definite AD	brain region: Middle Temporal Gyrus	84	subject id: 457	567.288	38.076	-26.4495	-10.7531	5.7071	-0.258728	-1.00653	1.40135
219	GSM2233825	neuropathological category: definite AD	brain region: Middle Temporal Gyrus	85	subject id: 623	555.321	-10.1575	-49.4935	-6.21986	-1.11798	-0.315282	-15.6611	6.01031
220	GSM2233841	neuropathological category: definite AD	brain region: Middle Temporal Gyrus	85	subject id: 870	561.427	-0.42205	-16.1796	-4.89713	-5.11953	21.221	10.1905	8.45473
221	GSM2233810	neuropathological category: definite AD	brain region: Middle Temporal Gyrus	87	subject id: 375	551.07	-4.97887	-57.7326	9.4251	9.33683	0.95382	1.31545	5.29412
222	GSM2233814	neuropathological category: definite AD	brain region: Middle Temporal Gyrus	87	subject id: 462	551.537	-14.1538	-33.2479	15.1832	6.9974	10.7232	0.902093	1.61938
223	GSM2233816	neuropathological category: definite AD	brain region: Middle Temporal Gyrus	87	subject id: 488	569.869	19.967	-24.4676	-16.702	-3.23344	18.0108	-1.06887	-11.6692
224	GSM2233831	neuropathological category: definite AD	brain region: Middle Temporal Gyrus	87	subject id: 755	570.303	19.1722	-17.6991	-17.7302	-6.3103	20.6116	-3.75379	-3.61849
225	GSM2233821	neuropathological category: definite AD	brain region: Middle Temporal Gyrus	89	subject id: 571	564.614	22.2004	-21.8476	-18.0217	-1.84896	7.6338	2.77251	3.9421
226	GSM2233828	neuropathological category: definite AD	brain region: Middle Temporal Gyrus	89	subject id: 66	573.078	34.5359	23.8413	-0.868799	-6.68364	11.3917	8.84735	-2.3216
227	GSM2233802	neuropathological category: definite AD	brain region: Middle Temporal Gyrus	91	subject id: 215	562.412	2.29026	-15.2364	-5.08277	-6.19711	16.6726	5.25956	-10.3083
228	GSM2233798	neuropathological category: definite AD	brain region: Middle Temporal Gyrus	92	subject id: 1023	560.426	-15.1693	12.8546	7.87963	-14.4876	13.1799	-3.4868	-12.2058
229	GSM2233806	neuropathological category: definite AD	brain region: Middle Temporal Gyrus	92	subject id: 273	562.258	1.36248	-30.5669	-1.32635	-0.166183	14.6449	-3.85605	-6.43384
230	GSM2233808	neuropathological category: definite AD	brain region: Middle Temporal Gyrus	94	subject id: 332	571.663	42.2692	-14.3245	-18.102	11.474	14.0982	-6.78623	4.8301
231	GSM2233833	neuropathological category: definite AD	brain region: Middle Temporal Gyrus	95	subject id: 786	544.602	-32.7079	-52.1539	3.76039	0.655241	3.71977	6.40616	16.84
232	GSM2233805	neuropathological category: definite AD	brain region: Middle Temporal Gyrus	99	subject id: 256	566.124	-0.523541	8.41569	-0.834854	-15.9051	8.34278	-13.7769	-11.9977
233	GSM2233854	neuropathological category: Normal	brain region: Superior Temporal Gyrus	60	subject id: 1018	559.192	31.0667	22.8588	7.47079	5.26428	5.93652	3.45457	-3.79893
234	GSM2233912	neuropathological category: Normal	brain region: Superior Temporal Gyrus	62	subject id: 990	555.321	30.0934	19.2281	13.377	10.6971	4.47632	5.96832	0.0457249
235	GSM2233906	neuropathological category: Normal	brain region: Superior Temporal Gyrus	69	subject id: 923	552.314	6.20722	0.675953	1.82042	1.50673	5.87252	-2.23593	-2.82766
236	GSM2233860	neuropathological category: Normal	brain region: Superior Temporal Gyrus	70	subject id: 2010	563.076	22.8465	-2.21558	-27.6915	-6.58842	3.5886	5.12402	5.58722
237	GSM2233881	neuropathological category: Normal	brain region: Superior Temporal Gyrus	82	subject id: 523	566.707	37.4237	10.1208	-27.3027	-1.85155	7.83333	2.77325	1.86245
238	GSM2233901	neuropathological category: Normal	brain region: Superior Temporal Gyrus	83	subject id: 842	553.716	-2.47035	-4.53846	0.967239	-10.4725	1.72426	-5.30985	-4.77413
239	GSM2233855	neuropathological category: Normal	brain region: Superior Temporal Gyrus	85	subject id: 1039	547.067	-8.95617	13.2429	21.7705	5.61219	6.3088	1.0659	1.61755
240	GSM2233882	neuropathological category: Normal	brain region: Superior Temporal Gyrus	85	subject id: 551	564.768	32.215	13.2567	-18.5845	1.48858	3.23863	-2.37122	11.0601
241	GSM2233898	neuropathological category: Normal	brain region: Superior Temporal Gyrus	86	subject id: 82	558.362	2.4327	5.63622	-25.1109	-16.3908	2.89168	17.6853	6.60227
242	GSM2233897	neuropathological category: Normal	brain region: Superior Temporal Gyrus	89	subject id: 800	559.141	13.0849	11.1952	-11.7228	-5.38443	3.55983	-19.5758	-0.929658
243	GSM2233865	neuropathological category: Normal	brain region: Superior Temporal Gyrus	90	subject id: 25	553.154	1.15466	-2.78566	3.99869	-3.32082	-0.232779	7.27461	-8.53141
244	GSM2233895	neuropathological category: Normal	brain region: Superior Temporal Gyrus	95	subject id: 776	553.922	6.22473	-15.4189	-11.634	-5.35903	0.0180422	-13.9321	-10.7242
245	GSM2233862	neuropathological category: Normal	brain region: Superior Temporal Gyrus	96	subject id: 230	554.707	23.6591	-12.9406	1.51638	2.02056	-3.73504	-5.7876	-17.9206
246	GSM2233888	neuropathological category: Normal	brain region: Superior Temporal Gyrus	102	subject id: 625	555.808	5.24124	4.21133	-7.11766	-0.526186	15.0428	-14.6074	4.57454
247	GSM2233900	neuropathological category: Possible AD	brain region: Superior Temporal Gyrus	64	subject id: 836	557.197	31.6813	0.0699206	-5.0036	1.29568	-3.2444	-0.912165	-5.57147
248	GSM2233902	neuropathological category: Possible AD	brain region: Superior Temporal Gyrus	79	subject id: 865	554.788	5.49852	6.29406	1.30498	-2.89282	6.59937	-6.21203	-0.526869
249	GSM2233871	neuropathological category: Possible AD	brain region: Superior Temporal Gyrus	82	subject id: 360	553.024	-7.86559	16.0019	11.2507	-5.46179	8.61574	-17.3659	-10.9039
250	GSM2233874	neuropathological category: Possible AD	brain region: Superior Temporal Gyrus	83	subject id: 386	551.428	2.87399	5.66884	3.04726	0.501415	6.65823	-6.1958	2.6885
251	GSM2233907	neuropathological category: Possible AD	brain region: Superior Temporal Gyrus	83	subject id: 940	537.643	-12.9701	-1.34413	33.928	10.4867	0.494619	-5.61484	4.89593
252	GSM2233890	neuropathological category: Possible AD	brain region: Superior Temporal Gyrus	86	subject id: 639	550.369	3.73257	12.7432	16.1199	9.62155	16.6677	-6.52849	-6.49009
253	GSM2233908	neuropathological category: Possible AD	brain region: Superior Temporal Gyrus	88	subject id: 941	560.663	18.5935	25.392	12.0898	-10.4285	1.47655	-11.6166	-11.0199
254	GSM2233905	neuropathological category: Possible AD	brain region: Superior Temporal Gyrus	89	subject id: 914	546.585	-4.92209	-4.48364	14.7347	-3.21675	5.83868	-0.085833	-7.83687
255	GSM2233875	neuropathological category: Possible AD	brain region: Superior Temporal Gyrus	90	subject id: 417	558.574	23.816	3.38495	-5.30405	0.558355	1.941	-2.67042	-3.63075
256	GSM2233884	neuropathological category: Possible AD	brain region: Superior Temporal Gyrus	90	subject id: 589	552.125	20.5949	3.62713	7.86805	5.64922	2.02388	-4.45219	14.5608
257	GSM2233899	neuropathological category: Possible AD	brain region: Superior Temporal Gyrus	90	subject id: 83	564.242	31.5043	15.8125	-27.6325	21.2847	4.65231	-24.4162	-4.36765
258	GSM2233879	neuropathological category: Possible AD	brain region: Superior Temporal Gyrus	91	subject id: 480	558.606	35.6659	14.4429	-6.07927	15.1071	5.1414	-5.98058	6.89819
259	GSM2233887	neuropathological category: Possible AD	brain region: Superior Temporal Gyrus	91	subject id: 616	553.582	-6.8577	1.33574	-3.94011	-4.6053	11.0956	-18.3175	-3.71046
260	GSM2233910	neuropathological category: Possible AD	brain region: Superior Temporal Gyrus	96	subject id: 973	538.177	-3.49104	-41.7577	18.8421	16.5182	4.01869	15.7652	-15.7467
261	GSM2233864	neuropathological category: Possible AD	brain region: Superior Temporal Gyrus	99	subject id: 234	555.172	18.0788	-1.79383	-2.71737	6.12428	5.46521	11.0575	-2.2533
262	GSM2233911	neuropathological category: Probable AD	brain region: Superior Temporal Gyrus	79	subject id: 988	550.706	6.18971	16.7708	15.2748	8.37248	11.727	9.46027	5.06884
263	GSM2233893	neuropathological category: Probable AD	brain region: Superior Temporal Gyrus	84	subject id: 752	554.611	-10.866	-34.503	-25.6414	-17.0637	-0.50153	-12.7245	-6.67391
264	GSM2233859	neuropathological category: Probable AD	brain region: Superior Temporal Gyrus	86	subject id: 184	558.522	13.7442	6.1875	-2.64751	-8.52755	-1.6185	5.18718	-5.41746
265	GSM2233904	neuropathological category: Probable AD	brain region: Superior Temporal Gyrus	90	subject id: 882	553.213	9.23606	-15.9383	-9.49718	-1.78251	1.24068	-7.07471	4.79535
266	GSM2233856	neuropathological category: Probable AD	brain region: Superior Temporal Gyrus	93	subject id: 111	551.397	8.5999	18.2498	28.8465	3.53768	5.52557	2.31633	-7.32512
267	GSM2233909	neuropathological category: Probable AD	brain region: Superior Temporal Gyrus	93	subject id: 95	553.261	-6.16846	-8.97707	-11.7827	-6.82127	3.02527	-8.47896	5.72018
268	GSM2233885	neuropathological category: Probable AD	brain region: Superior Temporal Gyrus	95	subject id: 592	557.981	24.5098	8.1862	-0.955679	9.04078	8.61742	-1.09773	-1.20712
269	GSM2233853	neuropathological category: Probable AD	brain region: Superior Temporal Gyrus	98	subject id: 1012	557.079	7.29214	20.8135	10.9482	-14.4158	-0.992384	1.11438	-14.3569
270	GSM2233863	neuropathological category: Probable AD	brain region: Superior Temporal Gyrus	100	subject id: 233	554.868	11.3294	17.801	8.86963	-1.49297	5.97667	0.927816	-7.20012
271	GSM2233868	neuropathological category: definite AD	brain region: Superior Temporal Gyrus	64	subject id: 316	538.529	-44.4533	-34.8724	-7.90395	-9.91729	4.93377	2.84879	-5.04245
272	GSM2233858	neuropathological category: definite AD	brain region: Superior Temporal Gyrus	72	subject id: 176	542.254	-45.1089	4.50744	8.35933	-15.4158	5.67412	12.1605	0.272905
273	GSM2233876	neuropathological category: definite AD	brain region: Superior Temporal Gyrus	83	subject id: 451	545.401	-16.3182	9.96431	19.7823	8.68698	9.60095	-4.59227	0.01766
274	GSM2233870	neuropathological category: definite AD	brain region: Superior Temporal Gyrus	84	subject id: 347	558.618	19.7153	5.04645	-5.97808	2.62946	15.6047	-0.090558	-15.2772
275	GSM2233872	neuropathological category: definite AD	brain region: Superior Temporal Gyrus	84	subject id: 364	549.134	-23.2669	-3.016	-5.42686	-11.2492	6.17799	-2.17708	-0.223605
276	GSM2233903	neuropathological category: definite AD	brain region: Superior Temporal Gyrus	85	subject id: 870	556.585	12.8965	-10.7914	-12.0877	-9.38336	-6.08601	0.775168	-6.6293
277	GSM2233873	neuropathological category: definite AD	brain region: Superior Temporal Gyrus	87	subject id: 375	553.216	20.0956	5.48746	-0.0975699	10.4714	5.34105	0.803505	2.66363
278	GSM2233877	neuropathological category: definite AD	brain region: Superior Temporal Gyrus	87	subject id: 462	554.481	11.3258	9.77021	-2.01577	9.198	23.5717	-8.78088	1.98675
279	GSM2233894	neuropathological category: definite AD	brain region: Superior Temporal Gyrus	87	subject id: 755	559.806	15.7618	6.14441	-11.1581	-3.5938	-0.375787	-12.3289	2.46038
280	GSM2233883	neuropathological category: definite AD	brain region: Superior Temporal Gyrus	89	subject id: 571	559.626	26.8419	-2.46062	-16.5148	0.782832	1.94425	-3.10041	3.83589
281	GSM2233892	neuropathological category: definite AD	brain region: Superior Temporal Gyrus	89	subject id: 66	553.676	20.2188	8.15733	6.41005	4.55743	15.1166	11.2372	3.26121
282	GSM2233878	neuropathological category: definite AD	brain region: Superior Temporal Gyrus	90	subject id: 468	528.161	-26.8648	-28.1995	37.9579	7.7579	1.57836	7.26869	-5.71409
283	GSM2233861	neuropathological category: definite AD	brain region: Superior Temporal Gyrus	91	subject id: 215	546.408	-5.88739	-11.244	0.568874	7.5885	13.5769	-1.10793	-9.77408
284	GSM2233867	neuropathological category: definite AD	brain region: Superior Temporal Gyrus	92	subject id: 273	534.755	-13.5048	-34.9815	19.7285	19.3532	3.53887	1.60136	-12.7058
285	GSM2233896	neuropathological category: definite AD	brain region: Superior Temporal Gyrus	92	subject id: 782	542.119	-19.363	-38.587	2.49027	-1.17532	-10.0204	-11.5419	-5.9735
286	GSM2233857	neuropathological category: definite AD	brain region: Superior Temporal Gyrus	94	subject id: 13	558.499	40.4397	13.8051	3.10406	6.96811	-4.01183	13.8212	13.6662
287	GSM2233869	neuropathological category: definite AD	brain region: Superior Temporal Gyrus	94	subject id: 332	540.034	8.07509	-1.30647	28.2335	23.553	8.33279	2.97274	7.04737
288	GSM2233880	neuropathological category: definite AD	brain region: Superior Temporal Gyrus	94	subject id: 505	561.896	44.9601	-1.13692	-10.1948	16.5208	23.8406	19.1935	-0.777286
289	GSM2233889	neuropathological category: definite AD	brain region: Superior Temporal Gyrus	94	subject id: 630	542.621	-19.6642	-1.01219	19.591	4.5572	17.7039	-10.709	-14.0602
290	GSM2233891	neuropathological category: definite AD	brain region: Superior Temporal Gyrus	94	subject id: 640	537.235	-31.7363	-14.9669	14.3928	10.2966	19.0251	-13.378	-15.1993
291	GSM2233866	neuropathological category: definite AD	brain region: Superior Temporal Gyrus	99	subject id: 256	554.212	3.20105	24.5581	11.3056	-0.989322	11.1007	-18.3696	-19.5672
292	GSM2233886	neuropathological category: definite AD	brain region: Superior Temporal Gyrus	103	subject id: 607	540.486	-24.9536	-10.8197	4.99856	1.12137	19.2145	-6.27201	-6.16008
293	GSM2233959	neuropathological category: Normal	brain region: Posterior Cingulate Cortex	66	subject id: 843	546.806	-19.0407	-5.50378	-13.5643	-20.6694	19.254	11.5964	-13.5163
294	GSM2233938	neuropathological category: Normal	brain region: Posterior Cingulate Cortex	69	subject id: 495	545.908	10.5436	-44.5492	-20.1898	-8.79804	-4.99435	2.48895	-5.22776
295	GSM2233919	neuropathological category: Normal	brain region: Posterior Cingulate Cortex	70	subject id: 2010	543.869	-14.4201	-18.6662	-20.9643	4.84057	5.37685	2.0852	-19.0071
296	GSM2233966	neuropathological category: Normal	brain region: Posterior Cingulate Cortex	74	subject id: 972	539.791	-5.27023	-26.9999	-1.35571	-8.11999	-10.0574	3.37845	5.13954
297	GSM2233939	neuropathological category: Normal	brain region: Posterior Cingulate Cortex	82	subject id: 523	547.904	12.3418	-30.1265	-17.4837	-12.3184	-4.68672	15.6631	3.67736
298	GSM2233958	neuropathological category: Normal	brain region: Posterior Cingulate Cortex	83	subject id: 842	545.989	-1.74099	-8.22305	-3.96528	-19.3402	-2.90323	-9.83442	-9.92169
299	GSM2233940	neuropathological category: Normal	brain region: Posterior Cingulate Cortex	85	subject id: 551	550.037	27.6522	-21.1461	-10.0284	-6.5786	-3.58588	0.0585401	-4.04298
300	GSM2233955	neuropathological category: Normal	brain region: Posterior Cingulate Cortex	86	subject id: 82	547.785	-14.1294	-1.54379	-16.8603	-14.9594	13.0705	15.7422	11.7799
301	GSM2233953	neuropathological category: Normal	brain region: Posterior Cingulate Cortex	89	subject id: 800	548.844	10.7825	-21.6569	-17.5149	-9.9226	-2.95767	-7.2283	-2.61036
302	GSM2233951	neuropathological category: Normal	brain region: Posterior Cingulate Cortex	95	subject id: 776	546.384	-4.53393	-24.751	-22.8509	-14.6008	6.0376	-4.52297	-3.67956
303	GSM2233921	neuropathological category: Normal	brain region: Posterior Cingulate Cortex	96	subject id: 230	548.988	9.50566	4.50663	-11.8406	-15.8843	-2.39142	-1.8567	-3.22178
304	GSM2233946	neuropathological category: Normal	brain region: Posterior Cingulate Cortex	102	subject id: 625	541.788	-13.5316	-31.679	-9.92218	-10.5323	6.20669	8.58909	3.99332
305	GSM2233957	neuropathological category: Possible AD	brain region: Posterior Cingulate Cortex	64	subject id: 836	533.77	3.70585	-53.1102	4.38663	5.97003	-20.5354	6.00278	8.88812
306	GSM2233960	neuropathological category: Possible AD	brain region: Posterior Cingulate Cortex	79	subject id: 865	545.987	12.115	7.64156	1.77092	-12.5926	-8.32148	5.04275	7.33821
307	GSM2233927	neuropathological category: Possible AD	brain region: Posterior Cingulate Cortex	82	subject id: 360	545.207	-7.83857	11.3877	1.3492	-13.362	0.177677	-12.6553	-3.96902
308	GSM2233944	neuropathological category: Possible AD	brain region: Posterior Cingulate Cortex	82	subject id: 618	554.206	31.5849	-9.74876	-19.7841	-12.1396	-10.9612	1.45118	3.07899
309	GSM2233954	neuropathological category: Possible AD	brain region: Posterior Cingulate Cortex	82	subject id: 804	548.331	-2.44788	12.2592	-1.75273	-27.5022	-13.6536	-7.82173	0.707325
310	GSM2233948	neuropathological category: Possible AD	brain region: Posterior Cingulate Cortex	86	subject id: 639	529.274	-12.1688	-49.5805	15.7678	3.1613	-11.073	2.086	-0.73826
311	GSM2233964	neuropathological category: Possible AD	brain region: Posterior Cingulate Cortex	88	subject id: 941	539.808	-18.806	7.01679	18.4662	-4.88275	9.08475	-6.9408	-3.7104
312	GSM2233963	neuropathological category: Possible AD	brain region: Posterior Cingulate Cortex	89	subject id: 914	539.767	5.48189	-12.2417	14.6064	-4.6073	-1.0927	8.18512	-16.2263
313	GSM2233956	neuropathological category: Possible AD	brain region: Posterior Cingulate Cortex	90	subject id: 83	545.96	-7.70825	-19.8866	-17.4574	-9.23068	5.96839	-12.5146	-4.6579
314	GSM2233962	neuropathological category: Possible AD	brain region: Posterior Cingulate Cortex	90	subject id: 892	546.443	9.24726	30.9735	17.9294	-19.6935	-21.1096	4.10942	8.65016
315	GSM2233936	neuropathological category: Possible AD	brain region: Posterior Cingulate Cortex	91	subject id: 480	552.383	25.7523	14.9379	-1.25823	-8.68863	4.98815	12.8194	-1.08151
316	GSM2233943	neuropathological category: Possible AD	brain region: Posterior Cingulate Cortex	91	subject id: 616	547.799	-6.68036	-32.815	-32.3834	-16.6236	-1.59193	-21.2155	8.77174
317	GSM2233967	neuropathological category: Possible AD	brain region: Posterior Cingulate Cortex	96	subject id: 973	546.612	13.7322	-9.17294	0.192839	-10.7042	-0.255517	1.26469	-3.25594
318	GSM2233913	neuropathological category: Possible AD	brain region: Posterior Cingulate Cortex	98	subject id: 1006	545.36	3.40725	-1.43915	-2.08661	-8.60829	-1.36789	-1.82618	-8.20478
319	GSM2233923	neuropathological category: Possible AD	brain region: Posterior Cingulate Cortex	99	subject id: 234	547.372	-5.38666	4.95574	0.193415	-3.79218	17.6995	23.7741	9.17406
320	GSM2233969	neuropathological category: Probable AD	brain region: Posterior Cingulate Cortex	79	subject id: 988	547.641	9.10184	15.002	8.99627	-8.6675	1.45379	7.19754	-2.45891
321	GSM2233915	neuropathological category: Probable AD	brain region: Posterior Cingulate Cortex	80	subject id: 1027	534.866	-32.4217	-0.528914	20.4184	-18.2637	4.55083	9.11709	-6.62243
322	GSM2233918	neuropathological category: Probable AD	brain region: Posterior Cingulate Cortex	86	subject id: 184	543.939	9.81213	-36.7118	-6.02797	-11.3689	-13.7192	7.45741	-3.99074
323	GSM2233916	neuropathological category: Probable AD	brain region: Posterior Cingulate Cortex	93	subject id: 111	549.033	9.37788	14.7409	11.9646	-14.2879	-1.69981	3.97219	-11.1629
324	GSM2233929	neuropathological category: Probable AD	brain region: Posterior Cingulate Cortex	93	subject id: 367	533.001	-13.8439	-51.8282	-1.04513	-4.86648	-12.3668	3.24951	6.7433
325	GSM2233965	neuropathological category: Probable AD	brain region: Posterior Cingulate Cortex	93	subject id: 956	547.517	15.1757	20.8409	11.8021	-22.987	-26.6982	-14.1574	0.640125
326	GSM2233942	neuropathological category: Probable AD	brain region: Posterior Cingulate Cortex	95	subject id: 592	548.254	20.323	-33.3182	-18.7822	-4.44439	-6.39691	-0.325162	2.51236
327	GSM2233922	neuropathological category: Probable AD	brain region: Posterior Cingulate Cortex	100	subject id: 233	539.989	-30.1993	-22.8624	-6.3957	-23.4672	-8.1561	-2.9309	-12.559
328	GSM2233917	neuropathological category: definite AD	brain region: Posterior Cingulate Cortex	72	subject id: 176	538.87	-27.4725	0.680921	12.1069	-20.7746	-3.72803	11.2323	-5.81487
329	GSM2233970	neuropathological category: definite AD	brain region: Posterior Cingulate Cortex	73	subject id: 989	535.347	-21.1994	3.5593	19.3557	-15.6303	2.4692	12.2231	-1.8411
330	GSM2233932	neuropathological category: definite AD	brain region: Posterior Cingulate Cortex	80	subject id: 427	544.473	7.92671	-28.1756	-9.41279	0.480374	1.99923	8.35169	6.90783
331	GSM2233933	neuropathological category: definite AD	brain region: Posterior Cingulate Cortex	83	subject id: 451	542.224	-2.7372	0.822277	-0.860637	-9.29953	2.42533	4.88293	2.7296
332	GSM2233926	neuropathological category: definite AD	brain region: Posterior Cingulate Cortex	84	subject id: 347	545.07	14.8858	-19.734	-4.29368	-3.78277	2.49576	-1.98095	-7.61328
333	GSM2233928	neuropathological category: definite AD	brain region: Posterior Cingulate Cortex	84	subject id: 364	539.5	-26.1423	-14.8544	-11.284	-6.55192	9.96345	-6.22037	-2.89579
334	GSM2233934	neuropathological category: definite AD	brain region: Posterior Cingulate Cortex	84	subject id: 457	546.751	21.1484	-30.0681	-12.9382	-3.15898	-6.3722	5.84774	0.619241
335	GSM2233945	neuropathological category: definite AD	brain region: Posterior Cingulate Cortex	85	subject id: 623	551.692	18.116	-29.028	-21.2762	-12.7764	-3.73931	-13.9285	10.041
336	GSM2233961	neuropathological category: definite AD	brain region: Posterior Cingulate Cortex	85	subject id: 870	545.675	-25.1135	2.56889	-21.8504	-23.5675	2.51522	10.1798	19.05
337	GSM2233931	neuropathological category: definite AD	brain region: Posterior Cingulate Cortex	87	subject id: 375	537.082	-17.9153	-26.6933	3.49638	0.574951	15.7681	21.2733	-4.63733
338	GSM2233935	neuropathological category: definite AD	brain region: Posterior Cingulate Cortex	87	subject id: 462	550.079	-1.05296	-14.666	-24.8315	-11.366	17.0017	-2.43257	1.18442
339	GSM2233937	neuropathological category: definite AD	brain region: Posterior Cingulate Cortex	87	subject id: 488	547.335	9.4803	-11.8197	-6.48396	-11.6757	2.29104	7.8335	4.53311
340	GSM2233950	neuropathological category: definite AD	brain region: Posterior Cingulate Cortex	87	subject id: 755	553.252	24.6395	-12.563	-23.7167	-7.12113	2.17813	0.178565	1.3264
341	GSM2233947	neuropathological category: definite AD	brain region: Posterior Cingulate Cortex	88	subject id: 626	536.144	1.4056	-37.514	7.27736	-4.40101	-21.5998	-9.38451	13.7459
342	GSM2233941	neuropathological category: definite AD	brain region: Posterior Cingulate Cortex	89	subject id: 571	546.437	-1.43582	-17.8579	-13.0336	-4.4153	5.47448	12.6884	21.2698
343	GSM2233949	neuropathological category: definite AD	brain region: Posterior Cingulate Cortex	89	subject id: 66	550.17	23.6195	-25.3196	-21.2685	-7.7387	-4.60207	6.82114	1.63256
344	GSM2233968	neuropathological category: definite AD	brain region: Posterior Cingulate Cortex	90	subject id: 975	530.275	-40.8554	-4.94749	10.2933	-4.46988	7.05278	5.70782	8.25678
345	GSM2233920	neuropathological category: definite AD	brain region: Posterior Cingulate Cortex	91	subject id: 215	547.881	2.49652	-0.797707	-10.0499	-3.59844	8.24878	-5.85972	1.10651
346	GSM2233914	neuropathological category: definite AD	brain region: Posterior Cingulate Cortex	92	subject id: 1023	538.866	-23.3334	0.0556162	11.2059	-18.0526	7.09793	0.42229	-16.1661
347	GSM2233925	neuropathological category: definite AD	brain region: Posterior Cingulate Cortex	94	subject id: 332	563.261	45.9044	5.2045	-35.6142	-6.72125	-1.1369	-7.03343	3.33698
348	GSM2233952	neuropathological category: definite AD	brain region: Posterior Cingulate Cortex	95	subject id: 786	546.028	-3.35726	-36.0225	-25.6004	-15.524	-2.6431	7.58665	4.03559
349	GSM2233924	neuropathological category: definite AD	brain region: Posterior Cingulate Cortex	99	subject id: 256	544.004	-10.1592	4.28103	5.44263	-17.2551	0.913981	-4.16085	-18.3409
350	GSM2233930	neuropathological category: definite AD	brain region: Posterior Cingulate Cortex	100	subject id: 370	540.082	-11.9014	6.23567	24.9394	-11.4815	3.02395	1.2955	-3.00786
351	GSM2233971	neuropathological category: Normal	brain region: Anterior Cingulate	60	subject id: 1018	575.993	3.86457	7.01113	12.501	-2.12522	8.51728	4.66306	0.175618
352	GSM2234029	neuropathological category: Normal	brain region: Anterior Cingulate	62	subject id: 990	581.388	33.8809	12.5105	19.0857	7.67039	1.64073	3.38611	-6.56812
353	GSM2233998	neuropathological category: Normal	brain region: Anterior Cingulate	69	subject id: 495	576.286	13.5138	-40.129	-7.08903	-2.34717	-7.89301	2.32529	-9.62672
354	GSM2233977	neuropathological category: Normal	brain region: Anterior Cingulate	70	subject id: 2010	587.222	7.42641	-2.82807	-30.1072	-20.2782	8.31955	16.2059	-5.7024
355	GSM2234027	neuropathological category: Normal	brain region: Anterior Cingulate	74	subject id: 972	575.195	8.04485	-3.49061	11.5947	0.88071	0.712934	-3.07389	-8.02851
356	GSM2234020	neuropathological category: Normal	brain region: Anterior Cingulate	75	subject id: 872	567.072	-34.1356	-8.2556	6.61792	-16.3684	10.5789	11.228	3.18012
357	GSM2233999	neuropathological category: Normal	brain region: Anterior Cingulate	82	subject id: 523	582.052	24.968	21.7325	9.99706	0.758571	2.61616	17.2434	1.17202
358	GSM2234017	neuropathological category: Normal	brain region: Anterior Cingulate	83	subject id: 842	577.267	-4.60527	15.6558	12.3209	-9.07987	8.95867	5.16476	-9.85431
359	GSM2233974	neuropathological category: Normal	brain region: Anterior Cingulate	85	subject id: 1039	577.591	6.40005	22.3934	12.4553	-2.71598	11.291	9.59928	1.82883
360	GSM2234001	neuropathological category: Normal	brain region: Anterior Cingulate	85	subject id: 551	574.831	11.8475	-33.4763	-1.09191	-0.545441	-6.02209	5.92504	-6.23587
361	GSM2234014	neuropathological category: Normal	brain region: Anterior Cingulate	86	subject id: 82	574.509	22.6155	-36.5418	-3.72871	1.95345	-10.8165	7.50139	-9.41453
362	GSM2234013	neuropathological category: Normal	brain region: Anterior Cingulate	89	subject id: 800	585.995	12.442	-8.30206	-26.1532	-9.42069	9.64794	-11.0206	-1.72708
363	GSM2234000	neuropathological category: Normal	brain region: Anterior Cingulate	92	subject id: 532	575.301	-30.2281	19.0358	-3.67253	-12.1066	5.69104	-15.1231	17.8241
364	GSM2234011	neuropathological category: Normal	brain region: Anterior Cingulate	95	subject id: 776	582.598	-5.43642	-6.71024	-27.8831	-20.6021	4.09691	3.88985	2.06417
365	GSM2233979	neuropathological category: Normal	brain region: Anterior Cingulate	96	subject id: 230	585.408	23.6616	14.2181	-9.6712	-3.6124	3.09181	-0.186921	-0.401771
366	GSM2234005	neuropathological category: Normal	brain region: Anterior Cingulate	102	subject id: 625	571.209	-33.5204	3.16902	4.39452	-10.6178	17.1363	13.1112	-4.9227
367	GSM2234016	neuropathological category: Possible AD	brain region: Anterior Cingulate	64	subject id: 836	584.001	32.7969	-24.6439	-19.3763	0.875894	-9.08917	-1.60903	4.87966
368	GSM2234018	neuropathological category: Possible AD	brain region: Anterior Cingulate	79	subject id: 865	580.937	16.2161	10.1873	3.32284	-3.82292	1.92272	4.84514	0.796704
369	GSM2234004	neuropathological category: Possible AD	brain region: Anterior Cingulate	82	subject id: 618	582.336	9.72016	34.7722	8.45886	-17.65	-14.1247	2.52379	5.1008
370	GSM2234025	neuropathological category: Possible AD	brain region: Anterior Cingulate	83	subject id: 940	573.272	-21.6716	-3.38803	7.06257	-9.77361	6.34431	15.6196	-2.30562
371	GSM2234006	neuropathological category: Possible AD	brain region: Anterior Cingulate	86	subject id: 639	582.937	8.6295	-5.62294	-14.9122	-14.2498	2.04748	5.08576	-7.89935
372	GSM2234026	neuropathological category: Possible AD	brain region: Anterior Cingulate	88	subject id: 941	574.754	-4.98134	16.1725	16.5774	-7.46746	6.52874	-3.54571	-14.006
373	GSM2234024	neuropathological category: Possible AD	brain region: Anterior Cingulate	89	subject id: 914	582.939	21.0278	8.64002	0.108721	-5.04902	8.22141	4.96648	-13.6559
374	GSM2234015	neuropathological category: Possible AD	brain region: Anterior Cingulate	90	subject id: 83	588.519	48.4636	9.98858	-3.49877	6.78788	5.83696	-8.58536	-7.20298
375	GSM2233996	neuropathological category: Possible AD	brain region: Anterior Cingulate	91	subject id: 480	586.587	39.1914	10.02	-3.29394	9.86103	9.77337	2.28406	4.85192
376	GSM2234021	neuropathological category: Possible AD	brain region: Anterior Cingulate	91	subject id: 879	585.919	8.18113	10.1417	-18.1642	-11.7846	-0.79675	-9.70198	1.94831
377	GSM2233981	neuropathological category: Possible AD	brain region: Anterior Cingulate	99	subject id: 234	584.246	15.4765	-9.0757	-26.0227	-14.1592	-3.08583	13.1563	3.02232
378	GSM2234028	neuropathological category: Probable AD	brain region: Anterior Cingulate	79	subject id: 988	583.681	25.3328	12.6228	4.5418	0.214831	3.95739	4.3416	-0.164102
379	GSM2233973	neuropathological category: Probable AD	brain region: Anterior Cingulate	80	subject id: 1027	581.202	3.51392	24.2192	10.7917	-13.2082	4.16236	4.0666	-8.28697
380	GSM2233986	neuropathological category: Probable AD	brain region: Anterior Cingulate	83	subject id: 340	572.658	-14.2012	12.7705	22.652	-11.7993	-2.98434	-7.96936	-14.9796
381	GSM2234023	neuropathological category: Probable AD	brain region: Anterior Cingulate	85	subject id: 902	575.756	-53.8927	7.76323	-16.2321	-32.4895	7.1045	-1.62809	4.53918
382	GSM2234022	neuropathological category: Probable AD	brain region: Anterior Cingulate	90	subject id: 882	581.918	27.6043	-11.1982	-5.45469	4.19089	4.54591	-12.2235	-2.99494
383	GSM2234008	neuropathological category: Probable AD	brain region: Anterior Cingulate	92	subject id: 665	579.268	-10.7047	21.3712	6.74174	-27.6142	-10.0427	-4.96795	3.8934
384	GSM2233975	neuropathological category: Probable AD	brain region: Anterior Cingulate	93	subject id: 111	580.322	15.0464	22.0887	15.7455	-14.4908	-8.27373	5.07796	-12.2282
385	GSM2233989	neuropathological category: Probable AD	brain region: Anterior Cingulate	93	subject id: 367	574.347	-16.6807	-11.6402	3.00479	-10.4408	15.964	12.379	-12.7613
386	GSM2234019	neuropathological category: Probable AD	brain region: Anterior Cingulate	93	subject id: 869	554.496	-31.1917	-52.5684	21.4139	10.7226	-4.83231	1.25828	4.17618
387	GSM2234009	neuropathological category: Probable AD	brain region: Anterior Cingulate	94	subject id: 709	582.155	2.19196	27.7184	4.40131	-18.1538	-11.0744	-2.77565	10.5559
388	GSM2234003	neuropathological category: Probable AD	brain region: Anterior Cingulate	95	subject id: 592	590.35	24.4277	19.7924	-17.479	-17.7841	0.46191	7.93097	-0.152948
389	GSM2233980	neuropathological category: Probable AD	brain region: Anterior Cingulate	100	subject id: 233	586.413	17.1685	6.80046	-8.37518	-19.4372	-7.1793	2.96729	-9.46945
390	GSM2233984	neuropathological category: definite AD	brain region: Anterior Cingulate	64	subject id: 316	577.587	-20.826	1.85058	-3.31345	-17.6197	4.97799	2.30939	-0.218604
391	GSM2233991	neuropathological category: definite AD	brain region: Anterior Cingulate	80	subject id: 427	576.568	22.9327	-34.283	-6.65065	10.0012	-1.98714	12.779	8.76738
392	GSM2233992	neuropathological category: definite AD	brain region: Anterior Cingulate	83	subject id: 451	581.851	11.7906	24.6308	1.4001	-3.54101	4.51482	-1.05522	-1.2329
393	GSM2233987	neuropathological category: definite AD	brain region: Anterior Cingulate	84	subject id: 347	576.867	17.3506	7.28498	9.01803	9.15453	8.10927	-0.900604	-4.9579
394	GSM2233988	neuropathological category: definite AD	brain region: Anterior Cingulate	84	subject id: 364	582.16	-4.68828	-5.43985	-23.6298	-7.74821	19.3934	-3.6591	-0.783383
395	GSM2233993	neuropathological category: definite AD	brain region: Anterior Cingulate	84	subject id: 457	586.78	33.9217	5.3229	-16.7261	0.105561	6.80661	5.6706	3.60087
396	GSM2233990	neuropathological category: definite AD	brain region: Anterior Cingulate	87	subject id: 375	582.156	25.2924	-6.55418	-9.52542	3.56882	4.33935	-4.7504	3.92045
397	GSM2233994	neuropathological category: definite AD	brain region: Anterior Cingulate	87	subject id: 462	584.568	19.3914	-13.8528	-21.3072	0.54632	13.6173	-10.0697	0.727104
398	GSM2233997	neuropathological category: definite AD	brain region: Anterior Cingulate	87	subject id: 488	582.434	18.9458	-1.11215	-1.86708	-3.66802	6.90011	-0.434289	-4.80227
399	GSM2234010	neuropathological category: definite AD	brain region: Anterior Cingulate	87	subject id: 755	585.002	25.6496	-10.9143	-23.3588	-1.73899	3.77593	-0.831792	3.99319
400	GSM2234002	neuropathological category: definite AD	brain region: Anterior Cingulate	89	subject id: 571	589.08	40.5316	13.5514	-14.3267	6.12754	9.89063	-0.962329	4.96828
401	GSM2234007	neuropathological category: definite AD	brain region: Anterior Cingulate	89	subject id: 66	584.661	26.0424	-6.90039	-13.0945	0.515711	11.2183	4.36173	2.68539
402	GSM2233995	neuropathological category: definite AD	brain region: Anterior Cingulate	90	subject id: 468	567.824	-17.1947	-30.1553	12.1693	-7.4095	-0.185184	-2.22398	-4.39806
403	GSM2233978	neuropathological category: definite AD	brain region: Anterior Cingulate	91	subject id: 215	581.526	11.0577	-20.2644	-18.0578	-5.83552	-0.994292	-2.41125	0.677417
404	GSM2233972	neuropathological category: definite AD	brain region: Anterior Cingulate	92	subject id: 1023	579.763	-8.99783	20.4845	8.95298	-15.2946	5.65862	-1.98152	-6.49389
405	GSM2233983	neuropathological category: definite AD	brain region: Anterior Cingulate	92	subject id: 273	588.77	22.0046	14.4637	-14.7306	-8.76574	6.9486	-3.62376	-4.91105
406	GSM2233976	neuropathological category: definite AD	brain region: Anterior Cingulate	94	subject id: 13	585.908	46.8484	-32.0923	-26.9074	-0.198486	-12.5369	-5.24406	-7.08149
407	GSM2233985	neuropathological category: definite AD	brain region: Anterior Cingulate	94	subject id: 332	594.345	47.611	18.5066	-23.4651	3.56283	11.6519	6.08068	-3.86969
408	GSM2234012	neuropathological category: definite AD	brain region: Anterior Cingulate	95	subject id: 786	578.784	-4.46199	-22.5489	-18.9936	-16.5048	-0.326911	9.24062	-0.994669
409	GSM2233982	neuropathological category: definite AD	brain region: Anterior Cingulate	99	subject id: 256	583.421	13.9042	12.7298	1.81226	-13.608	-2.30579	-5.19699	-11.542
410	GSM2234089	neuropathological category: Normal	brain region: Parahippocampal Gyrus	62	subject id: 990	548.242	12.1863	1.49457	22.4442	17.4193	15.6476	0.61979	3.71954
411	GSM2234078	neuropathological category: Normal	brain region: Parahippocampal Gyrus	66	subject id: 843	544.458	-19.5626	-21.445	3.95601	0.341779	8.97428	-13.2183	-1.51309
412	GSM2234057	neuropathological category: Normal	brain region: Parahippocampal Gyrus	69	subject id: 495	551.304	6.56749	-9.44965	-2.34537	8.04615	12.2238	-12.2449	3.03112
413	GSM2234084	neuropathological category: Normal	brain region: Parahippocampal Gyrus	69	subject id: 923	549.749	-2.48959	-0.219338	4.53461	3.2446	7.3211	-6.42579	2.78902
414	GSM2234033	neuropathological category: Normal	brain region: Parahippocampal Gyrus	70	subject id: 2010	550.31	4.9538	-12.9583	-4.39553	5.30268	4.89438	2.45263	7.73483
415	GSM2234081	neuropathological category: Normal	brain region: Parahippocampal Gyrus	75	subject id: 872	529.343	-52.2939	-25.2101	26.0103	0.536549	9.46976	-14.2533	-6.00816
416	GSM2234059	neuropathological category: Normal	brain region: Parahippocampal Gyrus	82	subject id: 523	559.309	26.0009	15.4891	-11.6382	1.48463	8.28509	-8.36627	0.988415
417	GSM2234077	neuropathological category: Normal	brain region: Parahippocampal Gyrus	83	subject id: 842	539.771	-28.8492	-5.31953	26.2365	-7.99294	3.76529	2.48964	-10.256
418	GSM2234030	neuropathological category: Normal	brain region: Parahippocampal Gyrus	85	subject id: 1039	550.053	12.1064	14.6009	23.8983	1.83298	2.08185	6.77866	3.48495
419	GSM2234060	neuropathological category: Normal	brain region: Parahippocampal Gyrus	85	subject id: 551	557.465	15.79	11.7971	0.452268	9.59139	13.2849	-21.7662	4.05855
420	GSM2234040	neuropathological category: Normal	brain region: Parahippocampal Gyrus	88	subject id: 305	549.973	4.81315	11.094	14.5132	10.0794	10.8147	-7.85534	6.05179
421	GSM2234074	neuropathological category: Normal	brain region: Parahippocampal Gyrus	89	subject id: 800	549.725	-2.83699	-23.0461	-4.94348	-1.37187	9.23403	-11.228	-1.17058
422	GSM2234038	neuropathological category: Normal	brain region: Parahippocampal Gyrus	90	subject id: 25	553.722	1.52901	2.03745	-3.1299	-4.96947	4.16762	6.52199	-1.82666
423	GSM2234072	neuropathological category: Normal	brain region: Parahippocampal Gyrus	95	subject id: 776	547.557	-6.79182	-21.1827	0.882974	-0.799932	4.6723	-6.55957	-4.99541
424	GSM2234035	neuropathological category: Normal	brain region: Parahippocampal Gyrus	96	subject id: 230	554.413	20.4771	2.92908	3.57136	11.1409	7.28022	-9.11404	0.168116
425	GSM2234076	neuropathological category: Possible AD	brain region: Parahippocampal Gyrus	64	subject id: 836	558.974	31.2327	-6.51388	-9.89351	6.39709	8.64515	-3.85957	2.31462
426	GSM2234079	neuropathological category: Possible AD	brain region: Parahippocampal Gyrus	79	subject id: 865	556.372	11.9168	13.9346	4.18739	-1.21436	2.36581	-3.27796	-4.32417
427	GSM2234044	neuropathological category: Possible AD	brain region: Parahippocampal Gyrus	82	subject id: 360	548.288	-34.2533	15.9137	-2.47876	-6.06037	5.56847	-26.1593	19.0778
428	GSM2234047	neuropathological category: Possible AD	brain region: Parahippocampal Gyrus	83	subject id: 386	544.271	-10.5454	-9.91851	-3.73007	-4.22793	1.09137	-23.4819	-3.23267
429	GSM2234067	neuropathological category: Possible AD	brain region: Parahippocampal Gyrus	86	subject id: 639	545.047	-2.68759	-3.22302	22.2171	5.33191	9.17934	7.93914	-11.1047
430	GSM2234085	neuropathological category: Possible AD	brain region: Parahippocampal Gyrus	88	subject id: 941	541.538	-22.8507	-0.417144	33.1826	-1.00096	10.3065	-6.0064	-10.4259
431	GSM2234083	neuropathological category: Possible AD	brain region: Parahippocampal Gyrus	89	subject id: 914	553.071	-5.79864	4.38879	0.0877402	-12.4734	5.07651	0.0201137	-7.35604
432	GSM2234049	neuropathological category: Possible AD	brain region: Parahippocampal Gyrus	90	subject id: 417	542.453	-8.0545	-5.49301	12.7452	7.63655	10.6736	3.79776	4.12199
433	GSM2234075	neuropathological category: Possible AD	brain region: Parahippocampal Gyrus	90	subject id: 83	558.885	36.6224	-15.0463	-4.2308	8.06488	-5.44932	-11.1401	0.899594
434	GSM2234055	neuropathological category: Possible AD	brain region: Parahippocampal Gyrus	91	subject id: 480	562.324	26.4677	25.208	-12.138	9.2367	13.9207	-16.4585	9.45369
435	GSM2234065	neuropathological category: Possible AD	brain region: Parahippocampal Gyrus	91	subject id: 616	544.383	-30.7589	14.4995	21.1839	-6.04941	0.286814	-14.5245	10.679
436	GSM2234087	neuropathological category: Possible AD	brain region: Parahippocampal Gyrus	96	subject id: 973	552.157	19.8462	-13.7876	1.50287	1.06512	-2.18923	1.23612	-1.90538
437	GSM2234037	neuropathological category: Possible AD	brain region: Parahippocampal Gyrus	99	subject id: 234	552.806	20.1622	12.9698	20.7038	12.2786	5.02341	11.5108	-1.9831
438	GSM2234088	neuropathological category: Probable AD	brain region: Parahippocampal Gyrus	79	subject id: 988	551.942	1.81263	20.7441	8.18625	7.28913	9.9699	-6.292	10.5734
439	GSM2234042	neuropathological category: Probable AD	brain region: Parahippocampal Gyrus	83	subject id: 340	546.037	-17.2891	13.6221	21.1822	-10.835	-10.9223	-15.2275	9.61199
440	GSM2234032	neuropathological category: Probable AD	brain region: Parahippocampal Gyrus	86	subject id: 184	534.992	-11.1209	-38.2549	27.8044	4.6668	-24.4344	-0.345653	1.68284
441	GSM2234082	neuropathological category: Probable AD	brain region: Parahippocampal Gyrus	90	subject id: 882	557.679	5.56847	-13.7424	-26.3215	-1.46903	11.4361	-13.7651	4.20711
442	GSM2234086	neuropathological category: Probable AD	brain region: Parahippocampal Gyrus	90	subject id: 963	547.987	8.10253	-0.902927	22.5233	14.8978	7.17378	-6.46726	-2.67692
443	GSM2234069	neuropathological category: Probable AD	brain region: Parahippocampal Gyrus	92	subject id: 665	551.966	-29.1425	29.4836	2.46903	-12.5746	-6.23975	-32.4696	-1.67853
444	GSM2234070	neuropathological category: Probable AD	brain region: Parahippocampal Gyrus	94	subject id: 709	554.271	2.9184	27.4495	9.69927	0.0391013	-6.0128	-18.0181	14.2366
445	GSM2234062	neuropathological category: Probable AD	brain region: Parahippocampal Gyrus	95	subject id: 592	556.185	6.211	10.7857	-3.92471	-4.66321	13.3181	-14.5298	4.07607
446	GSM2234036	neuropathological category: Probable AD	brain region: Parahippocampal Gyrus	100	subject id: 233	548.222	-12.8793	3.9109	10.438	-6.42128	-1.03089	3.05049	-1.51234
447	GSM2234050	neuropathological category: definite AD	brain region: Parahippocampal Gyrus	80	subject id: 427	556.443	17.6303	8.30834	-6.51213	11.4428	3.6963	-8.0067	2.77139
448	GSM2234051	neuropathological category: definite AD	brain region: Parahippocampal Gyrus	83	subject id: 451	547.955	-9.26265	10.4301	4.72133	5.87784	3.03033	-12.7792	10.9355
449	GSM2234043	neuropathological category: definite AD	brain region: Parahippocampal Gyrus	84	subject id: 347	557.319	5.17308	7.43882	-9.37315	9.69583	24.0988	-10.8564	-0.0250591
450	GSM2234045	neuropathological category: definite AD	brain region: Parahippocampal Gyrus	84	subject id: 364	536.473	-36.4554	-9.93489	22.1842	5.56024	4.17785	-9.29807	6.26281
451	GSM2234052	neuropathological category: definite AD	brain region: Parahippocampal Gyrus	84	subject id: 457	559.52	27.2949	18.5572	0.507958	14.7801	17.7434	-0.132627	11.0143
452	GSM2234080	neuropathological category: definite AD	brain region: Parahippocampal Gyrus	85	subject id: 870	554.849	-9.58451	-8.22445	-19.872	-9.10845	12.3002	-1.23593	0.32385
453	GSM2234046	neuropathological category: definite AD	brain region: Parahippocampal Gyrus	87	subject id: 375	553.054	-4.31279	-0.745064	-7.79879	2.53035	5.9635	-15.3792	7.76016
454	GSM2234053	neuropathological category: definite AD	brain region: Parahippocampal Gyrus	87	subject id: 462	549.907	-1.34705	4.53154	8.19195	13.4726	24.5346	-9.48415	3.96759
455	GSM2234056	neuropathological category: definite AD	brain region: Parahippocampal Gyrus	87	subject id: 488	531.732	-42.519	-23.3477	19.761	9.09825	20.2136	-3.71274	3.64743
456	GSM2234064	neuropathological category: definite AD	brain region: Parahippocampal Gyrus	87	subject id: 611	539.608	-2.1258	-30.8095	13.0629	11.4601	5.46638	0.515508	11.4556
457	GSM2234071	neuropathological category: definite AD	brain region: Parahippocampal Gyrus	87	subject id: 755	553.679	-19.0517	-0.762326	-16.5077	-7.62572	19.7651	-8.40426	0.1326
458	GSM2234061	neuropathological category: definite AD	brain region: Parahippocampal Gyrus	89	subject id: 571	558.873	18.3588	7.44541	-16.7806	4.57492	12.4479	-1.86784	20.0058
459	GSM2234068	neuropathological category: definite AD	brain region: Parahippocampal Gyrus	89	subject id: 66	548.836	19.3429	3.01286	17.2151	12.2809	16.5631	12.5486	-3.57912
460	GSM2234054	neuropathological category: definite AD	brain region: Parahippocampal Gyrus	90	subject id: 468	537.019	-34.4872	-13.8261	17.7396	10.1865	17.9622	-10.1376	-7.58815
461	GSM2234034	neuropathological category: definite AD	brain region: Parahippocampal Gyrus	91	subject id: 215	552.821	0.0298993	-7.70936	-13.6068	1.91668	8.16397	-8.10441	7.1047
462	GSM2234031	neuropathological category: definite AD	brain region: Parahippocampal Gyrus	94	subject id: 13	556.893	25.4164	-3.61371	-3.6885	13.2543	3.83371	-9.17174	11.9113
463	GSM2234041	neuropathological category: definite AD	brain region: Parahippocampal Gyrus	94	subject id: 332	554.486	9.49068	7.73548	3.11097	5.22817	16.0035	1.9136	1.28032
464	GSM2234058	neuropathological category: definite AD	brain region: Parahippocampal Gyrus	94	subject id: 505	562.059	41.8783	8.29682	-1.21043	13.2243	17.0328	15.8898	9.2872
465	GSM2234066	neuropathological category: definite AD	brain region: Parahippocampal Gyrus	94	subject id: 630	546.069	3.97223	-8.87925	14.843	5.90315	6.90544	4.31432	-9.40471
466	GSM2234073	neuropathological category: definite AD	brain region: Parahippocampal Gyrus	95	subject id: 786	546.525	-37.2092	-27.8723	-15.3527	-7.24189	9.68762	7.35933	14.4778
467	GSM2234048	neuropathological category: definite AD	brain region: Parahippocampal Gyrus	96	subject id: 399	549.44	-30.5323	15.1524	-10.0917	0.691218	-5.96997	-15.9503	15.5751
468	GSM2234039	neuropathological category: definite AD	brain region: Parahippocampal Gyrus	99	subject id: 256	559.387	-9.27893	33.9048	-9.21468	-8.35204	2.70941	-21.4063	-9.1454
469	GSM2234063	neuropathological category: definite AD	brain region: Parahippocampal Gyrus	103	subject id: 607	526.772	-58.8767	-28.4715	25.3048	12.0256	13.0626	-5.523	8.17863
470	GSM2234147	neuropathological category: Normal	brain region: Temporal Pole	62	subject id: 990	567.359	7.36902	11.6005	33.076	18.6122	-8.2131	0.298374	8.30567
471	GSM2234133	neuropathological category: Normal	brain region: Temporal Pole	66	subject id: 843	561.153	-40.1694	-3.45101	31.3782	10.3766	9.94393	-0.770035	-1.08375
472	GSM2234114	neuropathological category: Normal	brain region: Temporal Pole	69	subject id: 495	572.785	-4.08381	12.7866	20.6429	15.548	8.11056	-2.23793	-0.212143
473	GSM2234140	neuropathological category: Normal	brain region: Temporal Pole	69	subject id: 923	572.836	-5.06838	15.7398	20.4063	10.7431	4.3417	-8.17627	1.38301
474	GSM2234096	neuropathological category: Normal	brain region: Temporal Pole	70	subject id: 2010	573.088	-5.47135	18.3178	18.5757	10.9778	10.0401	12.7415	7.13556
475	GSM2234115	neuropathological category: Normal	brain region: Temporal Pole	82	subject id: 523	580.527	25.4332	27.6289	12.3268	15.3196	7.99523	-1.78043	-0.298228
476	GSM2234132	neuropathological category: Normal	brain region: Temporal Pole	83	subject id: 842	571.258	-7.76526	7.34546	29.0427	14.4876	8.82052	-8.12311	-7.80163
477	GSM2234093	neuropathological category: Normal	brain region: Temporal Pole	85	subject id: 1039	577.283	5.9662	26.2199	10.6337	6.76542	0.650053	-17.2498	0.171825
478	GSM2234117	neuropathological category: Normal	brain region: Temporal Pole	85	subject id: 551	574.815	15.7152	21.3341	26.097	24.5336	8.96153	-4.89007	5.26651
479	GSM2234129	neuropathological category: Normal	brain region: Temporal Pole	86	subject id: 82	572.292	2.40326	12.3107	29.9643	15.2961	4.99244	5.48085	-2.77628
480	GSM2234128	neuropathological category: Normal	brain region: Temporal Pole	89	subject id: 800	568.377	-22.5113	-2.52653	21.0441	13.6722	14.3685	-14.9913	-5.51431
481	GSM2234116	neuropathological category: Normal	brain region: Temporal Pole	92	subject id: 532	572.161	-24.9639	17.873	11.0569	0.881022	0.800764	-20.4766	6.50145
482	GSM2234126	neuropathological category: Normal	brain region: Temporal Pole	95	subject id: 776	566.523	-18.931	8.40953	35.3842	13.8035	5.16721	-10.9694	-3.38543
483	GSM2234098	neuropathological category: Normal	brain region: Temporal Pole	96	subject id: 230	581.203	8.89651	31.8027	3.41536	2.62799	-2.88427	-15.6712	2.07042
484	GSM2234131	neuropathological category: Possible AD	brain region: Temporal Pole	64	subject id: 836	575.854	27.301	22.8229	28.8555	27.9687	4.422	0.793387	4.39072
485	GSM2234134	neuropathological category: Possible AD	brain region: Temporal Pole	79	subject id: 865	581.87	5.84455	11.6939	-0.689304	2.89124	2.58162	-16.5704	-4.15933
486	GSM2234105	neuropathological category: Possible AD	brain region: Temporal Pole	82	subject id: 360	562.966	-34.3243	10.1549	29.7676	1.6443	-11.71	-16.5139	13.6823
487	GSM2234121	neuropathological category: Possible AD	brain region: Temporal Pole	82	subject id: 618	575.907	-7.29491	22.6013	13.0087	-1.15807	-12.1174	-23.6564	8.17106
488	GSM2234141	neuropathological category: Possible AD	brain region: Temporal Pole	83	subject id: 940	562.456	-14.655	5.15848	37.4768	19.945	5.92891	4.37025	3.36875
489	GSM2234122	neuropathological category: Possible AD	brain region: Temporal Pole	86	subject id: 639	567.515	-12.9716	8.21085	29.29	12.739	11.707	0.537108	7.82218
490	GSM2234142	neuropathological category: Possible AD	brain region: Temporal Pole	88	subject id: 941	570.189	-2.90671	6.37262	33.3948	24.1535	16.6608	-2.68806	-5.7947
491	GSM2234139	neuropathological category: Possible AD	brain region: Temporal Pole	89	subject id: 914	568.094	-14.2932	7.92378	32.4352	16.5703	12.6207	-13.6432	-1.45608
492	GSM2234130	neuropathological category: Possible AD	brain region: Temporal Pole	90	subject id: 83	580.333	19.4091	23.0408	19.313	12.3662	7.19862	-2.45018	-2.99026
493	GSM2234112	neuropathological category: Possible AD	brain region: Temporal Pole	91	subject id: 480	571.349	6.40983	16.576	31.4952	23.9517	9.02883	2.29002	-1.34458
494	GSM2234120	neuropathological category: Possible AD	brain region: Temporal Pole	91	subject id: 616	574.565	-16.7287	19.7503	10.8805	0.362154	-2.65736	-25.3348	5.63676
495	GSM2234137	neuropathological category: Possible AD	brain region: Temporal Pole	91	subject id: 879	577.754	9.36866	28.9323	18.5392	8.45041	-5.13432	-15.1752	6.48478
496	GSM2234143	neuropathological category: Possible AD	brain region: Temporal Pole	96	subject id: 973	574.769	-4.99578	16.8186	16.2889	3.62644	5.60181	-4.03665	-0.504378
497	GSM2234090	neuropathological category: Possible AD	brain region: Temporal Pole	98	subject id: 1006	579.229	-2.28793	26.4314	13.3741	4.39572	14.4861	-8.12368	-6.858
498	GSM2234100	neuropathological category: Possible AD	brain region: Temporal Pole	99	subject id: 234	577.088	20.7363	27.4785	25.2207	17.9104	-0.514641	-4.08659	10.8415
499	GSM2234145	neuropathological category: Probable AD	brain region: Temporal Pole	79	subject id: 988	579.148	8.79427	23.0701	5.4283	7.68278	3.51619	-5.38313	6.15145
500	GSM2234092	neuropathological category: Probable AD	brain region: Temporal Pole	80	subject id: 1027	580.083	7.7628	18.9771	13.2774	5.29868	6.27197	-10.0994	-9.43379
501	GSM2234103	neuropathological category: Probable AD	brain region: Temporal Pole	83	subject id: 340	567.377	-14.7274	18.1073	36.0434	2.49115	-15.7066	-20.702	-2.03805
502	GSM2234095	neuropathological category: Probable AD	brain region: Temporal Pole	86	subject id: 184	564.733	-23.8689	-7.93934	37.8287	15.2168	11.6068	4.36699	-11.9258
503	GSM2234138	neuropathological category: Probable AD	brain region: Temporal Pole	90	subject id: 882	569.399	-10.4929	1.78176	19.174	17.6094	12.3968	-11.6922	4.06737
504	GSM2234124	neuropathological category: Probable AD	brain region: Temporal Pole	92	subject id: 665	568.433	-30.4586	17.0724	20.014	-6.45907	-14.0642	-26.1032	8.39664
505	GSM2234094	neuropathological category: Probable AD	brain region: Temporal Pole	93	subject id: 111	582.106	12.9217	24.4771	6.85291	3.0332	6.3632	-7.03251	-7.52014
506	GSM2234135	neuropathological category: Probable AD	brain region: Temporal Pole	93	subject id: 869	564.904	-42.0823	5.2193	20.2843	5.58123	8.84644	-13.2984	-5.41269
507	GSM2234119	neuropathological category: Probable AD	brain region: Temporal Pole	95	subject id: 592	585.847	29.3298	43.3049	4.17798	9.24251	-3.40495	-9.62568	8.80047
508	GSM2234091	neuropathological category: Probable AD	brain region: Temporal Pole	98	subject id: 1012	585.944	7.33888	29.286	0.416892	-3.36865	6.86545	-1.55796	-8.10982
509	GSM2234099	neuropathological category: Probable AD	brain region: Temporal Pole	100	subject id: 233	572.818	-6.75116	20.96	21.3561	4.86973	-5.21062	-14.3225	-2.31645
510	GSM2234102	neuropathological category: definite AD	brain region: Temporal Pole	64	subject id: 316	581.395	9.03538	25.968	9.50513	5.65172	5.43175	-22.4288	-17.1257
511	GSM2234146	neuropathological category: definite AD	brain region: Temporal Pole	73	subject id: 989	564.966	-21.0113	7.61787	31.2345	17.502	9.93173	-7.16627	-2.0022
512	GSM2234108	neuropathological category: definite AD	brain region: Temporal Pole	83	subject id: 451	574.18	-12.1909	27.8812	15.0812	3.05009	0.0187767	-20.5993	4.49484
513	GSM2234104	neuropathological category: definite AD	brain region: Temporal Pole	84	subject id: 347	568.681	0.685416	15.3723	36.1142	22.636	5.80004	-3.02676	-3.42397
514	GSM2234109	neuropathological category: definite AD	brain region: Temporal Pole	84	subject id: 457	583.615	28.4778	39.3681	12.8515	17.0099	2.09734	-10.626	1.28749
515	GSM2234136	neuropathological category: definite AD	brain region: Temporal Pole	85	subject id: 870	573.9	-1.62434	18.6222	21.5334	16.5459	11.3677	-6.03591	5.09944
516	GSM2234106	neuropathological category: definite AD	brain region: Temporal Pole	87	subject id: 375	564.284	-14.617	8.89791	42.4141	20.7014	2.80244	2.25952	-1.14826
517	GSM2234110	neuropathological category: definite AD	brain region: Temporal Pole	87	subject id: 462	574.677	4.23856	16.2066	14.3918	20.7631	16.2036	-6.90689	4.31834
518	GSM2234113	neuropathological category: definite AD	brain region: Temporal Pole	87	subject id: 488	574.812	-6.87484	12.1133	15.1519	10.9616	14.8149	-13.8922	-6.53787
519	GSM2234125	neuropathological category: definite AD	brain region: Temporal Pole	87	subject id: 755	569.966	-19.9248	8.9338	17.8525	8.95015	13.4682	-6.20719	3.82962
520	GSM2234118	neuropathological category: definite AD	brain region: Temporal Pole	89	subject id: 571	572.996	0.87057	23.957	23.8651	13.8295	6.12997	-3.24748	6.87245
521	GSM2234123	neuropathological category: definite AD	brain region: Temporal Pole	89	subject id: 66	580.661	19.1109	21.5654	11.9363	8.88729	8.75582	7.204	1.73162
522	GSM2234111	neuropathological category: definite AD	brain region: Temporal Pole	90	subject id: 463	558.041	-29.32	-5.35916	39.929	7.85316	-13.0193	-16.9795	-4.53333
523	GSM2234144	neuropathological category: definite AD	brain region: Temporal Pole	90	subject id: 975	567.019	-35.6532	10.4895	14.7177	8.9819	12.0383	-18.2812	7.35497
524	GSM2234097	neuropathological category: definite AD	brain region: Temporal Pole	91	subject id: 215	574.742	-10.544	5.26569	2.50734	6.96319	10.0905	-5.57619	10.3074
525	GSM2234101	neuropathological category: definite AD	brain region: Temporal Pole	92	subject id: 273	570.634	-10.8204	11.3543	16.9915	12.8974	2.43051	-16.8773	10.4624
526	GSM2234127	neuropathological category: definite AD	brain region: Temporal Pole	95	subject id: 786	563.193	-39.8869	-1.64579	21.8122	9.80883	6.31037	0.0702754	10.2507
527	GSM2234107	neuropathological category: definite AD	brain region: Temporal Pole	96	subject id: 399	574.322	-7.1138	12.6252	9.12542	-0.550531	-11.5325	0.647051	21.2639
528	GSM2234172	neuropathological category: Normal	brain region: Precentral Gyrus	69	subject id: 495	579.148	-3.31938	6.74891	8.67355	-9.05605	-15.5941	9.304	1.41098
529	GSM2234151	neuropathological category: Normal	brain region: Precentral Gyrus	85	subject id: 1039	583.8	7.1955	14.5557	8.52271	-3.70835	-4.14805	9.21743	1.58316
530	GSM2234186	neuropathological category: Normal	brain region: Precentral Gyrus	86	subject id: 82	582.338	15.285	21.9051	13.2463	3.46368	-7.88278	16.0209	3.85855
531	GSM2234184	neuropathological category: Normal	brain region: Precentral Gyrus	89	subject id: 800	581.213	2.7922	17.2884	6.7329	3.69129	5.08942	-1.06829	4.83557
532	GSM2234157	neuropathological category: Normal	brain region: Precentral Gyrus	96	subject id: 230	576.294	-5.51796	-0.375353	14.5922	2.37035	-8.46991	-2.00655	7.34955
533	GSM2234188	neuropathological category: Possible AD	brain region: Precentral Gyrus	64	subject id: 836	582.752	11.4464	21.598	14.6909	0.278227	-1.01834	16.0391	-5.00351
534	GSM2234189	neuropathological category: Possible AD	brain region: Precentral Gyrus	79	subject id: 865	581.661	14.1406	23.9089	11.0401	-0.724313	-10.3741	8.63955	6.62537
535	GSM2234163	neuropathological category: Possible AD	brain region: Precentral Gyrus	82	subject id: 360	577.867	-10.6424	26.0789	15.2614	-0.737332	-13.4354	-15.5834	13.889
536	GSM2234177	neuropathological category: Possible AD	brain region: Precentral Gyrus	82	subject id: 618	578.977	18.1373	30.4253	20.0284	-2.56341	-25.6883	9.25382	4.31076
537	GSM2234185	neuropathological category: Possible AD	brain region: Precentral Gyrus	82	subject id: 804	584.268	5.94087	26.2958	1.80496	-11.2159	-20.7022	-4.36546	5.92041
538	GSM2234194	neuropathological category: Possible AD	brain region: Precentral Gyrus	83	subject id: 940	586.887	25.4989	8.13313	-1.70363	2.80906	-10.6691	13.6017	9.91538
539	GSM2234195	neuropathological category: Possible AD	brain region: Precentral Gyrus	88	subject id: 941	568.501	-38.0386	4.48302	22.0923	-4.84767	2.2697	7.56692	1.55854
540	GSM2234193	neuropathological category: Possible AD	brain region: Precentral Gyrus	89	subject id: 914	578.236	7.67068	10.1122	19.3782	1.19666	-4.40603	3.2577	-9.33209
541	GSM2234187	neuropathological category: Possible AD	brain region: Precentral Gyrus	90	subject id: 83	581.877	23.5763	22.7691	11.8542	8.85184	-3.96862	-0.129334	7.68472
542	GSM2234170	neuropathological category: Possible AD	brain region: Precentral Gyrus	91	subject id: 480	577.559	14.2047	19.7867	26.6366	16.7848	-0.665814	20.6777	10.3772
543	GSM2234176	neuropathological category: Possible AD	brain region: Precentral Gyrus	91	subject id: 616	576.075	-22.354	13.6505	3.23955	-14.0267	-10.5646	-2.47458	3.08701
544	GSM2234148	neuropathological category: Possible AD	brain region: Precentral Gyrus	98	subject id: 1006	582.646	2.63647	24.3682	4.9767	-4.24021	-4.4683	3.9849	1.97674
545	GSM2234159	neuropathological category: Possible AD	brain region: Precentral Gyrus	99	subject id: 234	583.946	25.3869	35.9847	9.36848	0.732485	-14.2606	-1.20761	12.8471
546	GSM2234196	neuropathological category: Probable AD	brain region: Precentral Gyrus	79	subject id: 988	578.413	1.63788	16.8802	13.6625	-0.0681982	-7.77621	6.72938	5.16266
547	GSM2234181	neuropathological category: Probable AD	brain region: Precentral Gyrus	84	subject id: 750	578.736	16.9695	21.1962	23.7025	-8.57797	-34.7506	0.293015	1.1289
548	GSM2234173	neuropathological category: Probable AD	brain region: Precentral Gyrus	85	subject id: 504	585.976	19.0598	33.7058	3.62089	-1.98303	-14.3653	-5.42982	8.89212
549	GSM2234155	neuropathological category: Probable AD	brain region: Precentral Gyrus	86	subject id: 184	587.969	20.8353	17.7046	0.26667	-7.28034	-11.6626	14.4985	-1.49968
550	GSM2234192	neuropathological category: Probable AD	brain region: Precentral Gyrus	90	subject id: 882	574.228	0.149546	11.1887	27.3939	8.00851	-1.82676	14.1105	1.837
551	GSM2234179	neuropathological category: Probable AD	brain region: Precentral Gyrus	92	subject id: 665	576.969	-7.20597	15.4669	18.2163	-14.8334	-21.0747	2.65398	2.55991
552	GSM2234152	neuropathological category: Probable AD	brain region: Precentral Gyrus	93	subject id: 111	581.333	8.43759	19.0534	6.8937	-8.08761	-15.4002	6.41554	-0.282655
553	GSM2234190	neuropathological category: Probable AD	brain region: Precentral Gyrus	93	subject id: 869	561.713	-55.4519	3.82597	20.408	-3.2094	-1.4568	7.4872	12.8177
554	GSM2234180	neuropathological category: Probable AD	brain region: Precentral Gyrus	94	subject id: 709	580.346	-2.96582	28.2858	8.7371	-7.3252	-13.8184	-1.86883	8.28924
555	GSM2234175	neuropathological category: Probable AD	brain region: Precentral Gyrus	95	subject id: 592	579.458	14.9168	18.8574	21.5632	11.1003	-0.791465	13.9816	-3.59957
556	GSM2234149	neuropathological category: Probable AD	brain region: Precentral Gyrus	98	subject id: 1012	585.978	3.84233	9.88291	-9.79577	-7.45797	3.94984	13.7198	-1.45697
557	GSM2234158	neuropathological category: Probable AD	brain region: Precentral Gyrus	100	subject id: 233	574.949	-3.56007	19.5422	24.8789	4.82686	-10.5073	9.53506	8.31376
558	GSM2234154	neuropathological category: definite AD	brain region: Precentral Gyrus	72	subject id: 176	573.51	-33.8701	17.7834	10.917	-21.055	-22.6161	3.4188	9.8463
559	GSM2234166	neuropathological category: definite AD	brain region: Precentral Gyrus	80	subject id: 427	576.255	5.86146	21.7883	23.8526	11.713	-0.617121	18.9123	12.3608
560	GSM2234167	neuropathological category: definite AD	brain region: Precentral Gyrus	83	subject id: 451	579.8	1.91544	21.9773	6.21117	-4.23269	-11.9601	0.919745	0.279229
561	GSM2234162	neuropathological category: definite AD	brain region: Precentral Gyrus	84	subject id: 347	583.47	22.4101	30.9221	10.0671	1.65875	-8.74646	-5.22676	5.46824
562	GSM2234191	neuropathological category: definite AD	brain region: Precentral Gyrus	85	subject id: 870	576.063	-1.97773	16.7463	18.6548	-0.712455	-7.52047	19.5155	-0.424857
563	GSM2234164	neuropathological category: definite AD	brain region: Precentral Gyrus	87	subject id: 375	570.897	-8.16724	10.718	25.1097	8.35477	-2.61058	16.489	5.93313
564	GSM2234168	neuropathological category: definite AD	brain region: Precentral Gyrus	87	subject id: 462	580.748	11.3815	11.5546	6.59957	6.60231	4.24989	0.402353	10.3276
565	GSM2234171	neuropathological category: definite AD	brain region: Precentral Gyrus	87	subject id: 488	569.826	-4.629	5.55671	34.3454	14.3432	-0.485866	18.387	-0.309498
566	GSM2234182	neuropathological category: definite AD	brain region: Precentral Gyrus	87	subject id: 755	559.336	-31.5508	-8.11155	31.9201	11.6705	-6.14514	11.032	16.2603
567	GSM2234174	neuropathological category: definite AD	brain region: Precentral Gyrus	89	subject id: 571	575.382	3.34644	20.1403	26.3492	9.16232	2.28676	14.081	22.3167
568	GSM2234178	neuropathological category: definite AD	brain region: Precentral Gyrus	89	subject id: 66	584.137	17.0913	24.8314	10.6381	1.37657	-3.57331	16.9373	4.36865
569	GSM2234169	neuropathological category: definite AD	brain region: Precentral Gyrus	90	subject id: 463	566.148	-14.9566	4.00424	30.842	1.94613	-23.4841	5.7542	12.5687
570	GSM2234156	neuropathological category: definite AD	brain region: Precentral Gyrus	91	subject id: 215	577.145	-4.22498	4.98996	8.20275	5.24658	0.573928	5.44823	8.18244
571	GSM2234150	neuropathological category: definite AD	brain region: Precentral Gyrus	92	subject id: 1023	583.274	3.15264	21.5067	7.95467	-11.8211	-7.06602	4.90038	-7.75447
572	GSM2234160	neuropathological category: definite AD	brain region: Precentral Gyrus	92	subject id: 273	572.901	-13.1803	1.84503	21.8013	4.33932	-0.537074	2.34236	-2.71759
573	GSM2234153	neuropathological category: definite AD	brain region: Precentral Gyrus	94	subject id: 13	587.111	8.03375	24.8982	-11.6559	-6.45994	-1.45888	-0.525107	3.37786
574	GSM2234161	neuropathological category: definite AD	brain region: Precentral Gyrus	94	subject id: 332	576.858	11.1736	15.1537	20.3644	11.1519	-7.47701	11.3175	3.80533
575	GSM2234183	neuropathological category: definite AD	brain region: Precentral Gyrus	95	subject id: 786	578.085	-13.2476	12.8916	6.48732	-1.46927	5.62839	10.7	11.299
576	GSM2234165	neuropathological category: definite AD	brain region: Precentral Gyrus	96	subject id: 399	581.186	10.9898	24.6248	10.8188	0.672389	-11.0375	2.07914	12.7259
577	GSM2234222	neuropathological category: Normal	brain region: Inferior Frontal Gyrus	69	subject id: 495	577.976	28.3769	-10.9807	-4.07323	1.18089	6.09875	-7.09234	-1.38385
578	GSM2234202	neuropathological category: Normal	brain region: Inferior Frontal Gyrus	70	subject id: 2010	574.914	26.7961	-23.2373	-14.2219	3.0468	1.56125	4.74619	1.58414
579	GSM2234246	neuropathological category: Normal	brain region: Inferior Frontal Gyrus	74	subject id: 972	570.47	11.3541	10.4155	17.4245	1.67907	0.618067	-2.90719	4.98406
580	GSM2234223	neuropathological category: Normal	brain region: Inferior Frontal Gyrus	82	subject id: 523	575.173	21.4873	-4.54928	-9.22993	-3.98553	-1.65769	9.93229	1.73749
581	GSM2234240	neuropathological category: Normal	brain region: Inferior Frontal Gyrus	83	subject id: 842	569.702	-8.59345	3.84342	-0.833408	-11.1923	7.36014	-3.80934	7.54853
582	GSM2234224	neuropathological category: Normal	brain region: Inferior Frontal Gyrus	85	subject id: 551	581.168	28.8984	20.0431	-6.70723	-12.6652	-10.8493	-7.96661	8.30853
583	GSM2234237	neuropathological category: Normal	brain region: Inferior Frontal Gyrus	86	subject id: 82	579.292	35.0176	22.5528	3.14546	-3.66323	-7.54397	-0.864404	7.77771
584	GSM2234235	neuropathological category: Normal	brain region: Inferior Frontal Gyrus	89	subject id: 800	577.332	16.9498	-12.3067	-14.4072	-4.16479	5.13805	-5.71039	2.89069
585	GSM2234234	neuropathological category: Normal	brain region: Inferior Frontal Gyrus	95	subject id: 776	573.489	8.06717	-20.0337	-14.0337	-9.81081	-3.19574	-5.44571	-1.56283
586	GSM2234204	neuropathological category: Normal	brain region: Inferior Frontal Gyrus	96	subject id: 230	577.314	32.1605	2.22068	4.35438	1.06202	-0.273951	-4.44361	-2.30636
587	GSM2234229	neuropathological category: Normal	brain region: Inferior Frontal Gyrus	102	subject id: 625	571.186	1.42693	-1.34091	1.83412	-10.2912	0.32379	-9.95902	6.67348
588	GSM2234239	neuropathological category: Possible AD	brain region: Inferior Frontal Gyrus	64	subject id: 836	571.401	40.9599	-28.9402	-3.25982	10.9393	-17.6811	-9.64244	5.83845
589	GSM2234241	neuropathological category: Possible AD	brain region: Inferior Frontal Gyrus	79	subject id: 865	571.881	5.88544	9.62634	14.1109	-4.86669	3.39493	11.5567	0.103711
590	GSM2234212	neuropathological category: Possible AD	brain region: Inferior Frontal Gyrus	82	subject id: 360	565.21	-25.1949	16.1141	15.1039	-13.5821	-10.0216	-15.998	13.2455
591	GSM2234228	neuropathological category: Possible AD	brain region: Inferior Frontal Gyrus	82	subject id: 618	571.843	18.624	29.5463	23.6427	-1.07546	-12.735	-3.38207	6.4487
592	GSM2234236	neuropathological category: Possible AD	brain region: Inferior Frontal Gyrus	82	subject id: 804	569.029	-3.3899	12.5714	20.6847	-15.4176	-11.2092	-5.8339	-3.40244
593	GSM2234230	neuropathological category: Possible AD	brain region: Inferior Frontal Gyrus	86	subject id: 639	576.669	28.233	-16.4196	-6.26756	-2.11135	-1.3112	-4.69102	-6.71543
594	GSM2234245	neuropathological category: Possible AD	brain region: Inferior Frontal Gyrus	89	subject id: 914	574.506	15.7248	1.97754	3.38707	-6.02618	2.79334	0.443764	-8.78941
595	GSM2234238	neuropathological category: Possible AD	brain region: Inferior Frontal Gyrus	90	subject id: 83	569.978	29.7326	-22.6789	11.1811	11.178	-5.71387	-9.64943	-4.32607
596	GSM2234244	neuropathological category: Possible AD	brain region: Inferior Frontal Gyrus	90	subject id: 892	573.607	18.5073	33.3273	20.4504	-5.79551	-13.4434	-1.56618	2.95924
597	GSM2234220	neuropathological category: Possible AD	brain region: Inferior Frontal Gyrus	91	subject id: 480	578.053	40.1654	-11.2192	0.735402	11.5168	7.96952	5.09681	-0.0901075
598	GSM2234227	neuropathological category: Possible AD	brain region: Inferior Frontal Gyrus	91	subject id: 616	557.16	-35.0347	9.14988	37.2921	-6.85942	-4.2284	-7.4613	3.39087
599	GSM2234243	neuropathological category: Possible AD	brain region: Inferior Frontal Gyrus	91	subject id: 879	573.215	14.4624	7.5092	6.09259	-0.522708	-3.61525	-7.87443	5.88689
600	GSM2234247	neuropathological category: Possible AD	brain region: Inferior Frontal Gyrus	96	subject id: 973	576.55	24.911	4.77547	-0.804381	-7.35683	-5.13321	5.00116	2.30796
601	GSM2234197	neuropathological category: Possible AD	brain region: Inferior Frontal Gyrus	98	subject id: 1006	574.375	8.89005	11.0181	3.92376	-8.20644	1.61565	0.206314	7.7137
602	GSM2234206	neuropathological category: Possible AD	brain region: Inferior Frontal Gyrus	99	subject id: 234	572.717	31.2824	29.2007	26.1165	9.1116	-7.51987	3.22786	9.07576
603	GSM2234249	neuropathological category: Probable AD	brain region: Inferior Frontal Gyrus	79	subject id: 988	575.478	22.6521	14.9545	7.2147	0.0559217	0.756215	6.79046	6.67205
604	GSM2234199	neuropathological category: Probable AD	brain region: Inferior Frontal Gyrus	80	subject id: 1027	572.889	-7.27489	16.1178	4.36163	-15.0873	5.8985	7.45923	12.1517
605	GSM2234210	neuropathological category: Probable AD	brain region: Inferior Frontal Gyrus	83	subject id: 340	558.02	-18.7356	15.5248	46.7385	-3.79796	-10.8139	-15.4614	0.17937
606	GSM2234232	neuropathological category: Probable AD	brain region: Inferior Frontal Gyrus	84	subject id: 750	575.241	16.4265	20.2755	11.373	-11.8493	-13.302	1.74904	4.21687
607	GSM2234200	neuropathological category: Probable AD	brain region: Inferior Frontal Gyrus	93	subject id: 111	577.829	29.9392	18.6846	5.68132	-2.40295	-5.43429	-8.96537	-0.81791
608	GSM2234213	neuropathological category: Probable AD	brain region: Inferior Frontal Gyrus	93	subject id: 367	569.912	-5.60782	-21.8618	-8.20491	-11.5178	1.41978	4.39245	-1.08958
609	GSM2234226	neuropathological category: Probable AD	brain region: Inferior Frontal Gyrus	95	subject id: 592	581.801	30.7968	5.47003	-21.0217	-4.40605	5.40419	7.1103	6.31319
610	GSM2234205	neuropathological category: Probable AD	brain region: Inferior Frontal Gyrus	100	subject id: 233	572.52	12.4597	12.3612	16.1932	-1.07142	-6.41556	-4.11225	12.3026
611	GSM2234208	neuropathological category: definite AD	brain region: Inferior Frontal Gyrus	64	subject id: 316	569.807	-30.8858	-11.5126	-2.56479	-10.1234	33.7994	26.019	-8.79781
612	GSM2234215	neuropathological category: definite AD	brain region: Inferior Frontal Gyrus	80	subject id: 427	570.78	29.2386	-11.6992	1.56836	11.2443	1.78407	8.50432	9.80697
613	GSM2234216	neuropathological category: definite AD	brain region: Inferior Frontal Gyrus	83	subject id: 451	574.504	11.2896	14.9867	8.51443	-2.48041	-1.2379	-2.95465	7.21053
614	GSM2234211	neuropathological category: definite AD	brain region: Inferior Frontal Gyrus	84	subject id: 347	573.61	26.3323	-10.6692	-1.24652	13.1139	6.71709	-7.07167	-4.53678
615	GSM2234217	neuropathological category: definite AD	brain region: Inferior Frontal Gyrus	84	subject id: 457	576.848	30.1566	5.76076	12.7187	12.1321	17.9883	13.8069	3.90623
616	GSM2234242	neuropathological category: definite AD	brain region: Inferior Frontal Gyrus	85	subject id: 870	571.753	19.7848	-20.7031	7.71476	3.8215	0.912899	6.22324	0.470148
617	GSM2234214	neuropathological category: definite AD	brain region: Inferior Frontal Gyrus	87	subject id: 375	572.79	25.8408	-20.3735	-6.13436	3.24304	2.45098	3.91745	5.36761
618	GSM2234218	neuropathological category: definite AD	brain region: Inferior Frontal Gyrus	87	subject id: 462	574.445	7.19733	-15.6857	-14.9837	0.951981	10.7023	-2.63538	11.3398
619	GSM2234221	neuropathological category: definite AD	brain region: Inferior Frontal Gyrus	87	subject id: 488	571.977	10.9058	-5.15132	6.9739	-4.71969	2.28365	-1.22005	-4.58832
620	GSM2234233	neuropathological category: definite AD	brain region: Inferior Frontal Gyrus	87	subject id: 755	584.724	39.5541	21.7977	-13.8031	-3.66772	3.09069	-0.717198	3.55643
621	GSM2234225	neuropathological category: definite AD	brain region: Inferior Frontal Gyrus	89	subject id: 571	580.688	23.7367	-0.436293	-15.4303	-2.40542	9.44387	-0.658541	5.8577
622	GSM2234231	neuropathological category: definite AD	brain region: Inferior Frontal Gyrus	89	subject id: 66	582.434	44.7123	-3.73788	-19.8823	-4.85726	-2.95113	2.57676	2.91837
623	GSM2234219	neuropathological category: definite AD	brain region: Inferior Frontal Gyrus	90	subject id: 468	568.159	0.601506	-15.4853	16.7729	-8.77253	-2.90349	-1.07438	-6.5159
624	GSM2234248	neuropathological category: definite AD	brain region: Inferior Frontal Gyrus	90	subject id: 975	551.923	-51.4058	-7.82344	23.9705	-6.25041	0.738773	5.82555	8.81313
625	GSM2234203	neuropathological category: definite AD	brain region: Inferior Frontal Gyrus	91	subject id: 215	563.188	11.4303	-12.9631	-5.82434	9.13082	-13.0064	-0.680694	8.66407
626	GSM2234198	neuropathological category: definite AD	brain region: Inferior Frontal Gyrus	92	subject id: 1023	576.656	-4.38152	16.5919	-2.43954	-17.8616	4.9987	-1.58929	2.84716
627	GSM2234201	neuropathological category: definite AD	brain region: Inferior Frontal Gyrus	94	subject id: 13	579.433	34.6036	7.68153	-10.4929	-1.72215	-3.42839	3.94223	10.426
628	GSM2234209	neuropathological category: definite AD	brain region: Inferior Frontal Gyrus	94	subject id: 332	573.848	35.4722	1.8779	1.71341	10.254	-3.73757	0.106997	6.35573
629	GSM2234207	neuropathological category: definite AD	brain region: Inferior Frontal Gyrus	99	subject id: 256	571.261	-17.2438	8.10651	2.24203	-15.7482	1.92143	-4.79987	5.38629
630	GSM2234252	neuropathological category: Normal	brain region: Dorsolateral Prefrontal Cortex	60	subject id: 1018	582.684	27.884	11.1386	17.4746	7.33138	-6.81106	4.39162	-5.04133
631	GSM2234306	neuropathological category: Normal	brain region: Dorsolateral Prefrontal Cortex	62	subject id: 990	580.855	17.5653	8.16631	15.8166	1.58709	-5.43705	15.2023	1.37601
632	GSM2234274	neuropathological category: Normal	brain region: Dorsolateral Prefrontal Cortex	69	subject id: 495	584.856	14.4429	-12.2545	-14.1213	-0.519953	-1.46488	-5.03601	3.55515
633	GSM2234299	neuropathological category: Normal	brain region: Dorsolateral Prefrontal Cortex	69	subject id: 923	583.006	12.0973	-1.52676	1.50268	-3.26582	-5.68133	3.30134	-0.185319
634	GSM2234258	neuropathological category: Normal	brain region: Dorsolateral Prefrontal Cortex	70	subject id: 2010	591.219	26.4709	-0.893049	-17.4798	-6.6295	-1.47691	4.66196	1.70551
635	GSM2234303	neuropathological category: Normal	brain region: Dorsolateral Prefrontal Cortex	74	subject id: 972	582.817	11.2543	-2.33276	9.05061	-8.72228	-9.58474	-0.0435123	-5.3336
636	GSM2234275	neuropathological category: Normal	brain region: Dorsolateral Prefrontal Cortex	82	subject id: 523	567.677	10.6644	-39.1546	29.2752	17.1818	-20.6155	11.4128	-0.103497
637	GSM2234292	neuropathological category: Normal	brain region: Dorsolateral Prefrontal Cortex	83	subject id: 842	591.947	17.3948	18.0457	-13.5272	-12.3163	-3.46206	-9.02885	-1.2254
638	GSM2234282	neuropathological category: Normal	brain region: Dorsolateral Prefrontal Cortex	84	subject id: 684	573.993	-19.2691	-3.35439	-2.03996	1.90404	-1.8929	-16.395	16.0535
639	GSM2234254	neuropathological category: Normal	brain region: Dorsolateral Prefrontal Cortex	85	subject id: 1039	578.28	-10.4017	9.61463	13.6703	-6.0264	-1.13962	11.2904	1.06894
640	GSM2234276	neuropathological category: Normal	brain region: Dorsolateral Prefrontal Cortex	85	subject id: 551	582.391	18.5401	6.62544	7.444	-3.43289	-11.4043	2.38406	6.93853
641	GSM2234289	neuropathological category: Normal	brain region: Dorsolateral Prefrontal Cortex	86	subject id: 82	584.421	15.5348	1.93844	-2.26905	-5.48187	-12.7481	1.5705	6.72813
642	GSM2234287	neuropathological category: Normal	brain region: Dorsolateral Prefrontal Cortex	89	subject id: 800	582.919	-3.91076	23.3927	12.3392	-11.2482	3.82819	0.81846	-7.62532
643	GSM2234284	neuropathological category: Normal	brain region: Dorsolateral Prefrontal Cortex	95	subject id: 776	582.638	12.7493	-18.6038	-10.3593	0.864252	-7.10149	-4.67277	3.34295
644	GSM2234260	neuropathological category: Normal	brain region: Dorsolateral Prefrontal Cortex	96	subject id: 230	590.401	27.7737	15.4304	-11.0132	-3.6511	-6.7162	-7.2436	3.28068
645	GSM2234279	neuropathological category: Normal	brain region: Dorsolateral Prefrontal Cortex	102	subject id: 625	592.755	32.0475	16.4264	-9.84652	-4.26794	-7.2193	-0.0322038	11.3695
646	GSM2234291	neuropathological category: Possible AD	brain region: Dorsolateral Prefrontal Cortex	64	subject id: 836	587.253	37.1277	-27.2143	-14.0413	7.03461	-4.2223	4.85106	1.09396
647	GSM2234293	neuropathological category: Possible AD	brain region: Dorsolateral Prefrontal Cortex	79	subject id: 865	585.22	21.8925	13.2919	6.63014	-3.82793	-8.53399	6.72017	1.87569
648	GSM2234278	neuropathological category: Possible AD	brain region: Dorsolateral Prefrontal Cortex	82	subject id: 618	584.496	19.0487	22.5851	18.3211	-4.98115	-21.4735	-1.54253	4.48476
649	GSM2234288	neuropathological category: Possible AD	brain region: Dorsolateral Prefrontal Cortex	82	subject id: 804	583.321	10.0293	1.93828	9.42124	-11.3012	-10.543	-0.905186	-8.05078
650	GSM2234300	neuropathological category: Possible AD	brain region: Dorsolateral Prefrontal Cortex	83	subject id: 940	579.647	-11.2703	16.9568	16.207	-13.7829	-3.71371	8.67302	-4.51184
651	GSM2234280	neuropathological category: Possible AD	brain region: Dorsolateral Prefrontal Cortex	86	subject id: 639	581.659	11.8609	7.84691	14.7649	-1.79136	-7.33485	-4.45395	-1.54633
652	GSM2234301	neuropathological category: Possible AD	brain region: Dorsolateral Prefrontal Cortex	88	subject id: 941	583.305	7.34633	8.5097	11.746	-1.83269	0.280393	1.37481	-0.804667
653	GSM2234298	neuropathological category: Possible AD	brain region: Dorsolateral Prefrontal Cortex	89	subject id: 914	579.257	4.02167	-2.32818	12.0408	-1.77884	-2.40062	7.63506	-1.87889
654	GSM2234290	neuropathological category: Possible AD	brain region: Dorsolateral Prefrontal Cortex	90	subject id: 83	586.406	37.4193	-13.9071	-2.82277	5.7922	-15.1063	-4.93291	1.25328
655	GSM2234297	neuropathological category: Possible AD	brain region: Dorsolateral Prefrontal Cortex	90	subject id: 892	584.766	20.6639	18.6912	15.1775	-5.74232	-14.1649	8.22578	1.99917
656	GSM2234272	neuropathological category: Possible AD	brain region: Dorsolateral Prefrontal Cortex	91	subject id: 480	577.426	15.9892	-31.8605	10.4242	5.66477	-16.7591	9.6237	-6.8475
657	GSM2234250	neuropathological category: Possible AD	brain region: Dorsolateral Prefrontal Cortex	98	subject id: 1006	582.934	3.16134	7.55662	3.72603	-5.65128	1.95069	1.75367	-7.32824
658	GSM2234262	neuropathological category: Possible AD	brain region: Dorsolateral Prefrontal Cortex	99	subject id: 234	594.822	40.328	26.5746	-6.50418	0.674343	2.9675	15.9428	-2.54293
659	GSM2234304	neuropathological category: Probable AD	brain region: Dorsolateral Prefrontal Cortex	79	subject id: 988	583.563	12.2882	16.3563	5.81674	-1.93945	-0.357778	14.6203	1.43469
660	GSM2234286	neuropathological category: Probable AD	brain region: Dorsolateral Prefrontal Cortex	81	subject id: 798	584.362	5.87733	-4.60445	-5.04204	-6.42669	10.3909	5.77652	-18.4977
661	GSM2234257	neuropathological category: Probable AD	brain region: Dorsolateral Prefrontal Cortex	86	subject id: 184	569.465	5.4114	-48.8989	11.0267	6.80788	-17.595	10.4826	1.86337
662	GSM2234296	neuropathological category: Probable AD	brain region: Dorsolateral Prefrontal Cortex	90	subject id: 882	584.492	8.71534	17.5674	7.10348	-0.185772	5.96572	-0.127474	1.7613
663	GSM2234302	neuropathological category: Probable AD	brain region: Dorsolateral Prefrontal Cortex	90	subject id: 963	579.524	6.89831	-3.8678	14.713	-2.20919	-5.97524	0.355225	-11.3656
664	GSM2234255	neuropathological category: Probable AD	brain region: Dorsolateral Prefrontal Cortex	93	subject id: 111	589.211	30.4147	16.9479	8.11939	-9.55617	-15.1829	-4.78722	-0.538371
665	GSM2234267	neuropathological category: Probable AD	brain region: Dorsolateral Prefrontal Cortex	93	subject id: 367	574.467	-4.13756	-11.4527	9.42124	-7.64188	-6.31825	4.78104	-14.8093
666	GSM2234294	neuropathological category: Probable AD	brain region: Dorsolateral Prefrontal Cortex	93	subject id: 869	584.161	-3.65934	-11.2373	-12.2028	-14.5116	-7.98096	-18.993	0.0862263
667	GSM2234277	neuropathological category: Probable AD	brain region: Dorsolateral Prefrontal Cortex	95	subject id: 592	576.174	23.3348	-35.4334	7.69666	9.04986	-17.5322	5.15608	-12.8457
668	GSM2234251	neuropathological category: Probable AD	brain region: Dorsolateral Prefrontal Cortex	98	subject id: 1012	585.601	-3.78582	21.0322	1.74593	-16.8513	0.566482	15.8736	-5.53275
669	GSM2234261	neuropathological category: Probable AD	brain region: Dorsolateral Prefrontal Cortex	100	subject id: 233	581.471	12.7172	12.2128	10.9567	-4.11463	-12.343	1.29768	9.29406
670	GSM2234264	neuropathological category: definite AD	brain region: Dorsolateral Prefrontal Cortex	64	subject id: 316	569.587	-36.453	-16.0216	-22.7561	-15.8268	-8.94318	4.32239	11.098
671	GSM2234305	neuropathological category: definite AD	brain region: Dorsolateral Prefrontal Cortex	73	subject id: 989	585.042	8.10735	4.38005	8.05022	-9.85811	2.93305	6.93755	-18.5856
672	GSM2234266	neuropathological category: definite AD	brain region: Dorsolateral Prefrontal Cortex	84	subject id: 347	589.671	15.0119	6.93424	-1.73085	0.98758	22.8572	17.8337	-15.8785
673	GSM2234269	neuropathological category: definite AD	brain region: Dorsolateral Prefrontal Cortex	84	subject id: 457	576.248	16.4189	-23.1218	16.4928	10.1943	-8.77203	5.97706	0.622031
674	GSM2234295	neuropathological category: definite AD	brain region: Dorsolateral Prefrontal Cortex	85	subject id: 870	586.784	23.7901	-14.8166	-19.5338	-8.00428	-17.226	-0.193509	9.09353
675	GSM2234268	neuropathological category: definite AD	brain region: Dorsolateral Prefrontal Cortex	87	subject id: 375	591.682	24.1133	0.935217	-22.8216	-3.12754	-5.25144	0.779335	11.8812
676	GSM2234270	neuropathological category: definite AD	brain region: Dorsolateral Prefrontal Cortex	87	subject id: 462	571.095	5.25273	-46.4377	12.1904	12.298	-9.36984	-0.527657	0.0658704
677	GSM2234273	neuropathological category: definite AD	brain region: Dorsolateral Prefrontal Cortex	87	subject id: 488	575.196	5.47464	-43.4075	3.00586	1.8652	-14.9235	5.53759	-2.27086
678	GSM2234283	neuropathological category: definite AD	brain region: Dorsolateral Prefrontal Cortex	87	subject id: 755	587.133	27.5221	1.33769	-9.77045	1.33998	-1.85294	2.96853	5.32557
679	GSM2234281	neuropathological category: definite AD	brain region: Dorsolateral Prefrontal Cortex	89	subject id: 66	589.608	12.5118	21.1343	-2.53096	-9.68106	4.03356	16.525	1.11106
680	GSM2234271	neuropathological category: definite AD	brain region: Dorsolateral Prefrontal Cortex	90	subject id: 468	560.855	-19.231	-38.9106	39.4539	5.93093	-7.10412	0.451011	6.39427
681	GSM2234259	neuropathological category: definite AD	brain region: Dorsolateral Prefrontal Cortex	91	subject id: 215	580.942	6.13101	-40.9183	-21.335	-1.71479	-6.81485	5.21113	-1.21174
682	GSM2234253	neuropathological category: definite AD	brain region: Dorsolateral Prefrontal Cortex	92	subject id: 1023	586.995	3.31906	19.1369	4.59537	-13.1469	5.0141	-1.74571	-10.4214
683	GSM2234256	neuropathological category: definite AD	brain region: Dorsolateral Prefrontal Cortex	94	subject id: 13	594.3	12.945	-9.50214	-46.7593	-22.3907	-2.30831	18.3212	9.94682
684	GSM2234265	neuropathological category: definite AD	brain region: Dorsolateral Prefrontal Cortex	94	subject id: 332	597.688	39.3765	23.275	-24.4165	-1.84835	0.100654	1.15526	5.8087
685	GSM2234285	neuropathological category: definite AD	brain region: Dorsolateral Prefrontal Cortex	95	subject id: 786	584.744	13.2383	-6.34846	-9.69334	-7.09915	-9.73755	-3.14126	0.829088
686	GSM2234263	neuropathological category: definite AD	brain region: Dorsolateral Prefrontal Cortex	99	subject id: 256	587.925	9.48521	25.4037	2.84921	-10.274	-2.12787	7.78229	11.6786
687	GSM2234345	neuropathological category: Normal	brain region: Superior Parietal Lobule	66	subject id: 843	558.066	9.63431	-10.6799	5.39706	-5.1195	-10.1165	5.0625	1.6975
688	GSM2234325	neuropathological category: Normal	brain region: Superior Parietal Lobule	69	subject id: 495	565.716	15.9208	-8.68074	-14.7377	-15.5314	-16.1684	-3.60333	-0.856321
689	GSM2234351	neuropathological category: Normal	brain region: Superior Parietal Lobule	69	subject id: 923	558.382	11.3032	-6.76596	8.30634	-3.28974	-6.95128	1.0546	0.420419
690	GSM2234310	neuropathological category: Normal	brain region: Superior Parietal Lobule	70	subject id: 2010	563.916	16.4198	-4.00541	-0.160918	-4.27274	2.28828	3.39962	-6.24756
691	GSM2234354	neuropathological category: Normal	brain region: Superior Parietal Lobule	74	subject id: 972	554.477	9.75507	-17.7546	4.61025	-5.38104	-11.4817	-6.45537	-7.78904
692	GSM2234344	neuropathological category: Normal	brain region: Superior Parietal Lobule	83	subject id: 842	560.481	7.30273	-23.3752	-5.27165	-5.66857	-1.41561	-11.2441	-3.27485
693	GSM2234327	neuropathological category: Normal	brain region: Superior Parietal Lobule	85	subject id: 551	568.615	36.3651	-14.1435	-15.0641	-1.52203	-7.38559	-0.445146	10.5987
694	GSM2234341	neuropathological category: Normal	brain region: Superior Parietal Lobule	86	subject id: 82	562.036	6.59573	-30.2999	-23.212	-14.3997	-16.0554	4.45113	5.77081
695	GSM2234339	neuropathological category: Normal	brain region: Superior Parietal Lobule	89	subject id: 800	561.813	21.6704	-19.5222	-2.29834	5.58846	6.51681	-14.8034	-2.91726
696	GSM2234326	neuropathological category: Normal	brain region: Superior Parietal Lobule	92	subject id: 532	551.215	-39.2317	3.60449	2.80114	-10.9864	-1.42148	-12.2429	12.1734
697	GSM2234337	neuropathological category: Normal	brain region: Superior Parietal Lobule	95	subject id: 776	558.496	6.73093	-26.5014	-3.1657	-5.95035	-9.08096	-1.64331	-2.3787
698	GSM2234312	neuropathological category: Normal	brain region: Superior Parietal Lobule	96	subject id: 230	552.857	15.818	-9.75029	14.464	7.93134	-5.69899	1.57759	-7.0056
699	GSM2234332	neuropathological category: Normal	brain region: Superior Parietal Lobule	102	subject id: 625	553.144	-19.742	-11.1023	7.61807	-7.70933	-3.97979	-0.381894	7.92793
700	GSM2234343	neuropathological category: Possible AD	brain region: Superior Parietal Lobule	64	subject id: 836	569.569	52.9517	-21.2787	-9.84416	3.98582	-5.92451	-2.92969	-3.82186
701	GSM2234346	neuropathological category: Possible AD	brain region: Superior Parietal Lobule	79	subject id: 865	564.839	18.7148	18.3355	1.54895	-8.49228	-7.70456	-1.31428	6.9737
702	GSM2234331	neuropathological category: Possible AD	brain region: Superior Parietal Lobule	82	subject id: 618	562.568	19.0588	17.0488	16.9295	-4.99992	-12.2535	7.28952	10.3942
703	GSM2234340	neuropathological category: Possible AD	brain region: Superior Parietal Lobule	82	subject id: 804	555.634	5.01115	-0.616943	18.2724	4.56545	-2.87244	5.9366	10.0041
704	GSM2234333	neuropathological category: Possible AD	brain region: Superior Parietal Lobule	86	subject id: 639	561.276	10.2841	-11.5937	0.040505	-1.56957	7.43949	15.0759	-1.56241
705	GSM2234352	neuropathological category: Possible AD	brain region: Superior Parietal Lobule	88	subject id: 941	561.521	0.284937	7.0374	11.3338	-16.4493	-6.25748	-15.8694	-8.81553
706	GSM2234350	neuropathological category: Possible AD	brain region: Superior Parietal Lobule	89	subject id: 914	567.054	22.3805	-1.21645	-1.26632	-10.2034	-0.90598	1.08704	-2.3064
707	GSM2234319	neuropathological category: Possible AD	brain region: Superior Parietal Lobule	90	subject id: 417	565.578	20.0971	-7.19162	-1.00643	-14.6253	-6.63827	3.02095	-8.76186
708	GSM2234342	neuropathological category: Possible AD	brain region: Superior Parietal Lobule	90	subject id: 83	564.563	40.2543	-5.51214	-6.74008	1.38943	-9.20372	0.907906	-2.24808
709	GSM2234349	neuropathological category: Possible AD	brain region: Superior Parietal Lobule	90	subject id: 892	562.975	29.8341	23.4768	17.4395	2.18132	-12.3899	3.32941	14.5704
710	GSM2234323	neuropathological category: Possible AD	brain region: Superior Parietal Lobule	91	subject id: 480	562.418	30.3545	18.9083	13.5265	9.77028	-4.2011	3.39389	12.8147
711	GSM2234330	neuropathological category: Possible AD	brain region: Superior Parietal Lobule	91	subject id: 616	552.271	-23.2799	9.53839	26.3484	-14.5638	-8.5591	-8.86331	-8.59193
712	GSM2234355	neuropathological category: Possible AD	brain region: Superior Parietal Lobule	96	subject id: 973	556.711	18.8293	-21.4675	10.138	-3.30271	-12.6845	0.434332	-4.07544
713	GSM2234307	neuropathological category: Possible AD	brain region: Superior Parietal Lobule	98	subject id: 1006	561.807	9.0582	8.30225	18.2128	-14.2453	-9.24749	-6.49318	-21.71
714	GSM2234314	neuropathological category: Possible AD	brain region: Superior Parietal Lobule	99	subject id: 234	568.882	40.4815	-8.20863	-14.1485	1.13266	-3.52902	3.28392	4.62102
715	GSM2234356	neuropathological category: Probable AD	brain region: Superior Parietal Lobule	79	subject id: 988	562.174	17.4235	23.9582	23.4745	1.46219	-0.291136	11.2625	11.429
716	GSM2234316	neuropathological category: Probable AD	brain region: Superior Parietal Lobule	83	subject id: 340	539.047	-33.0972	-10.7012	45.8326	-3.69234	-16.9101	-2.75482	-3.5905
717	GSM2234309	neuropathological category: Probable AD	brain region: Superior Parietal Lobule	86	subject id: 184	541.326	5.85173	-22.408	35.4299	1.95519	-16.9481	11.4536	-13.9456
718	GSM2234348	neuropathological category: Probable AD	brain region: Superior Parietal Lobule	90	subject id: 882	562.493	20.9391	-29.8626	-14.4899	-4.18129	-7.58648	-4.03765	-3.10223
719	GSM2234334	neuropathological category: Probable AD	brain region: Superior Parietal Lobule	92	subject id: 665	544.969	-26.9976	-0.952158	36.7002	-10.6859	-19.7337	0.293812	-3.43716
720	GSM2234353	neuropathological category: Probable AD	brain region: Superior Parietal Lobule	93	subject id: 956	562.965	18.5775	20.6291	18.8335	-17.4061	-26.4443	-0.923825	3.92471
721	GSM2234335	neuropathological category: Probable AD	brain region: Superior Parietal Lobule	94	subject id: 709	559.191	-4.74382	13.6625	13.7599	-19.1608	-13.802	-7.9448	-4.68962
722	GSM2234329	neuropathological category: Probable AD	brain region: Superior Parietal Lobule	95	subject id: 592	562.228	13.6793	20.3249	20.3357	-6.27979	-7.59733	5.86597	6.14852
723	GSM2234313	neuropathological category: Probable AD	brain region: Superior Parietal Lobule	100	subject id: 233	556.256	7.17753	7.946	20.71	-5.13553	-13.7813	0.840902	2.35634
724	GSM2234320	neuropathological category: definite AD	brain region: Superior Parietal Lobule	62	subject id: 425	550.343	-8.21364	-17.8259	9.66177	3.54367	0.569037	-4.4353	1.1786
725	GSM2234321	neuropathological category: definite AD	brain region: Superior Parietal Lobule	80	subject id: 427	567.902	22.5279	-7.3987	-5.68349	-8.89637	1.90225	13.9496	-3.96824
726	GSM2234317	neuropathological category: definite AD	brain region: Superior Parietal Lobule	84	subject id: 347	563.462	23.9626	12.4599	8.73659	-7.91728	-17.4795	-7.7708	4.49221
727	GSM2234347	neuropathological category: definite AD	brain region: Superior Parietal Lobule	85	subject id: 870	559.646	9.07363	-33.4516	-6.80193	-7.52393	-1.56751	6.97244	-10.7815
728	GSM2234318	neuropathological category: definite AD	brain region: Superior Parietal Lobule	87	subject id: 375	556.353	15.7724	-23.1384	3.20928	2.10624	-0.749676	5.47232	2.33353
729	GSM2234322	neuropathological category: definite AD	brain region: Superior Parietal Lobule	87	subject id: 462	545.733	-1.26977	-15.0118	35.1572	13.8825	-0.105639	10.7905	7.72298
730	GSM2234324	neuropathological category: definite AD	brain region: Superior Parietal Lobule	87	subject id: 488	550.806	7.90548	-32.3835	19.8994	-0.552047	-19.854	4.61315	-4.79454
731	GSM2234336	neuropathological category: definite AD	brain region: Superior Parietal Lobule	87	subject id: 755	559.769	23.9984	-8.59693	-6.44696	-7.21178	-5.46752	3.75245	-1.79384
732	GSM2234328	neuropathological category: definite AD	brain region: Superior Parietal Lobule	89	subject id: 571	544.273	12.475	-60.606	13.6221	15.2585	-12.5833	5.14315	-2.64231
733	GSM2234311	neuropathological category: definite AD	brain region: Superior Parietal Lobule	91	subject id: 215	553.506	-4.78197	-1.21891	15.1855	2.07006	1.45166	2.42216	9.63107
734	GSM2234308	neuropathological category: definite AD	brain region: Superior Parietal Lobule	94	subject id: 13	559.069	30.9544	4.12605	19.2273	10.4863	-3.56922	7.90902	12.3442
735	GSM2234315	neuropathological category: definite AD	brain region: Superior Parietal Lobule	94	subject id: 332	557.715	32.2144	-13.8673	16.8221	16.6309	3.98898	6.21489	-1.27879
736	GSM2234338	neuropathological category: definite AD	brain region: Superior Parietal Lobule	95	subject id: 786	553	-11.1284	-10.5665	12.0704	-1.50149	4.87767	10.6251	7.87993
737	GSM2234402	neuropathological category: Normal	brain region: Prefrontal Cortex	66	subject id: 843	561.322	46.5628	-28.9862	-12.5512	3.1365	-14.4415	-0.543801	-2.52249
738	GSM2234386	neuropathological category: Normal	brain region: Prefrontal Cortex	69	subject id: 495	564.986	19.7848	-0.680389	-12.5283	-7.28701	0.645587	-5.57806	-0.583909
739	GSM2234406	neuropathological category: Normal	brain region: Prefrontal Cortex	69	subject id: 923	559.607	8.88213	-2.46996	-4.47472	-5.36458	0.567135	-3.4122	0.613804
740	GSM2234363	neuropathological category: Normal	brain region: Prefrontal Cortex	70	subject id: 2010	556.056	0.380272	-22.8558	-2.58119	-3.20706	5.11469	3.54346	-3.99819
741	GSM2234366	neuropathological category: Normal	brain region: Prefrontal Cortex	74	subject id: 232	560.03	21.3951	-15.0956	-8.52041	-8.79801	-4.81074	-10.5395	-11.6537
742	GSM2234401	neuropathological category: Normal	brain region: Prefrontal Cortex	83	subject id: 842	559.259	10.9605	-27.1841	-17.7989	-4.99961	-2.2789	-11.0259	0.673159
743	GSM2234398	neuropathological category: Normal	brain region: Prefrontal Cortex	86	subject id: 82	559.536	13.8673	-3.67603	4.73217	1.2888	2.32548	2.38868	7.64211
744	GSM2234397	neuropathological category: Normal	brain region: Prefrontal Cortex	89	subject id: 800	563.443	8.55762	-15.9701	-25.4228	-5.70762	11.9186	-12.1376	1.70296
745	GSM2234395	neuropathological category: Normal	brain region: Prefrontal Cortex	95	subject id: 776	561.349	8.342	-9.98617	-13.2442	-4.83403	3.99508	-10.422	-1.07358
746	GSM2234365	neuropathological category: Normal	brain region: Prefrontal Cortex	96	subject id: 230	545.453	-3.8975	-6.87168	18.0179	6.67936	-1.26512	2.28288	-7.34256
747	GSM2234392	neuropathological category: Normal	brain region: Prefrontal Cortex	102	subject id: 625	552.717	-2.93535	-3.50827	-4.25162	-0.526531	4.70584	-12.9301	-7.71496
748	GSM2234400	neuropathological category: Possible AD	brain region: Prefrontal Cortex	64	subject id: 836	560.669	42.866	-40.4146	-20.1357	10.4808	-9.00543	-10.9092	2.80056
749	GSM2234391	neuropathological category: Possible AD	brain region: Prefrontal Cortex	82	subject id: 618	561.119	9.84777	26.8732	12.3141	-12.935	-16.4721	-1.09054	2.47123
750	GSM2234377	neuropathological category: Possible AD	brain region: Prefrontal Cortex	83	subject id: 386	563.423	12.1631	-3.52622	-16.7197	-8.81393	5.15238	-12.2519	-0.0665703
751	GSM2234393	neuropathological category: Possible AD	brain region: Prefrontal Cortex	86	subject id: 639	562.534	10.6036	4.61403	-11.5677	-6.11484	1.63042	-12.0784	3.11889
752	GSM2234407	neuropathological category: Possible AD	brain region: Prefrontal Cortex	88	subject id: 941	560.041	11.2518	8.30525	8.567	-6.92508	1.02902	-10.9488	-7.89442
753	GSM2234388	neuropathological category: Possible AD	brain region: Prefrontal Cortex	90	subject id: 589	566.369	30.3939	7.56729	-13.9733	-5.21058	2.79588	7.28489	11.4627
754	GSM2234399	neuropathological category: Possible AD	brain region: Prefrontal Cortex	90	subject id: 83	571.181	45.2869	-0.841677	-21.5357	-4.76198	-2.91346	-3.0668	-0.072229
755	GSM2234384	neuropathological category: Possible AD	brain region: Prefrontal Cortex	91	subject id: 480	565.831	27.1771	20.0149	-8.35568	1.46878	0.183324	-3.98947	11.0454
756	GSM2234390	neuropathological category: Possible AD	brain region: Prefrontal Cortex	91	subject id: 616	551.261	-36.8859	15.6034	17.2291	-21.6478	-4.49734	-8.21202	-3.77347
757	GSM2234410	neuropathological category: Possible AD	brain region: Prefrontal Cortex	96	subject id: 973	556.637	4.61675	-17.9519	-2.22671	-5.87854	-0.990734	-8.43795	-9.32575
758	GSM2234357	neuropathological category: Possible AD	brain region: Prefrontal Cortex	98	subject id: 1006	562.327	1.40203	3.30906	6.50098	-19.9184	-3.56026	-11.552	-16.6428
759	GSM2234367	neuropathological category: Possible AD	brain region: Prefrontal Cortex	99	subject id: 234	566.73	34.6649	12.4905	-12.5465	-1.29241	1.26568	5.94849	7.45757
760	GSM2234411	neuropathological category: Probable AD	brain region: Prefrontal Cortex	79	subject id: 988	557.442	-3.09071	17.6719	8.34048	-2.46169	2.51707	10.7248	14.5687
761	GSM2234359	neuropathological category: Probable AD	brain region: Prefrontal Cortex	80	subject id: 1027	558.422	8.09071	-0.890981	-3.47046	-13.3956	-10.346	-1.70549	2.07851
762	GSM2234371	neuropathological category: Probable AD	brain region: Prefrontal Cortex	83	subject id: 340	541.7	-32.7653	3.99938	36.9023	-6.30919	-9.34694	-12.1262	-3.97066
763	GSM2234362	neuropathological category: Probable AD	brain region: Prefrontal Cortex	86	subject id: 184	566.444	26.5235	-7.28611	-23.5654	-11.8195	-2.15337	7.77757	-8.55441
764	GSM2234405	neuropathological category: Probable AD	brain region: Prefrontal Cortex	90	subject id: 882	560.84	19.3962	-29.7329	-17.4098	0.177232	1.30839	-9.86343	-1.1955
765	GSM2234360	neuropathological category: Probable AD	brain region: Prefrontal Cortex	93	subject id: 111	565.045	23.7089	13.6229	1.12287	-8.06825	-0.629397	-0.670134	-6.56968
766	GSM2234374	neuropathological category: Probable AD	brain region: Prefrontal Cortex	93	subject id: 367	559.769	-3.01259	-17.2837	-16.2248	-15.209	1.3208	-9.89046	-7.40651
767	GSM2234403	neuropathological category: Probable AD	brain region: Prefrontal Cortex	93	subject id: 869	553.642	-11.9411	-35.4766	-6.55025	-4.85191	0.511945	-11.2572	-0.93586
768	GSM2234408	neuropathological category: Probable AD	brain region: Prefrontal Cortex	93	subject id: 95	560.091	1.42537	-12.725	-10.7571	-9.42952	4.6193	-5.31612	-2.09324
769	GSM2234409	neuropathological category: Probable AD	brain region: Prefrontal Cortex	93	subject id: 956	559.504	8.37413	24.6661	18.1045	-15.019	-15.8686	-5.13879	3.22554
770	GSM2234389	neuropathological category: Probable AD	brain region: Prefrontal Cortex	95	subject id: 592	559.941	17.653	-3.03045	3.82045	2.49284	6.35714	7.80926	11.222
771	GSM2234358	neuropathological category: Probable AD	brain region: Prefrontal Cortex	98	subject id: 1012	556.951	-2.98431	13.3045	13.3287	-16.4684	-6.80151	-7.00188	-7.49549
772	GSM2234378	neuropathological category: definite AD	brain region: Prefrontal Cortex	62	subject id: 425	551.266	-2.88881	-11.8049	8.27933	3.35242	6.81281	4.24349	-2.83573
773	GSM2234369	neuropathological category: definite AD	brain region: Prefrontal Cortex	64	subject id: 316	548.664	-32.536	-18.5752	-7.22115	-10.015	1.36865	-10.3159	18.6045
774	GSM2234383	neuropathological category: definite AD	brain region: Prefrontal Cortex	74	subject id: 479	567.457	11.1245	6.61266	-23.8065	-13.4643	6.3885	-12.1306	1.18025
775	GSM2234379	neuropathological category: definite AD	brain region: Prefrontal Cortex	80	subject id: 427	566.203	25.1476	21.6345	-6.70411	2.63459	17.1005	15.3634	6.84561
776	GSM2234375	neuropathological category: definite AD	brain region: Prefrontal Cortex	83	subject id: 372	537.69	-30.7281	-29.9289	20.8742	15.27	5.57121	2.08261	13.7377
777	GSM2234380	neuropathological category: definite AD	brain region: Prefrontal Cortex	83	subject id: 451	560.326	-2.73884	18.0573	0.112394	-12.2736	-1.61249	-0.173449	5.86275
778	GSM2234372	neuropathological category: definite AD	brain region: Prefrontal Cortex	84	subject id: 347	547.722	-2.39813	-2.09342	28.4864	15.0803	10.8152	1.8059	4.43035
779	GSM2234373	neuropathological category: definite AD	brain region: Prefrontal Cortex	84	subject id: 364	560.895	-5.66295	-8.12889	-17.0493	-6.90549	7.61142	-8.72603	5.26873
780	GSM2234381	neuropathological category: definite AD	brain region: Prefrontal Cortex	84	subject id: 457	565.026	21.6378	15.7945	-2.39373	1.01288	12.6101	12.8824	4.70486
781	GSM2234404	neuropathological category: definite AD	brain region: Prefrontal Cortex	85	subject id: 870	565.112	21.4411	-17.7564	-23.4003	-7.19268	1.93901	1.95215	-7.08721
782	GSM2234376	neuropathological category: definite AD	brain region: Prefrontal Cortex	87	subject id: 375	562.724	17.8632	-10.2166	-13.1316	-3.15136	4.76269	-4.21997	3.27033
783	GSM2234382	neuropathological category: definite AD	brain region: Prefrontal Cortex	87	subject id: 462	564.42	10.6343	9.22915	-10.6281	0.0086313	20.4206	-1.99522	2.93703
784	GSM2234385	neuropathological category: definite AD	brain region: Prefrontal Cortex	87	subject id: 488	566.026	8.30923	10.6763	-18.2572	-19.1134	-2.3382	-6.53167	1.7813
785	GSM2234394	neuropathological category: definite AD	brain region: Prefrontal Cortex	87	subject id: 755	569.71	19.0103	-0.0364631	-24.8996	-14.8004	7.42323	0.193689	-10.0806
786	GSM2234412	neuropathological category: definite AD	brain region: Prefrontal Cortex	88	subject id: 992	549.053	-26.0078	-2.16984	9.82796	-11.9961	0.42568	-7.64395	-7.29478
787	GSM2234387	neuropathological category: definite AD	brain region: Prefrontal Cortex	89	subject id: 571	557.737	27.4771	-7.35101	-12.0335	9.92985	1.93761	0.373891	5.5718
788	GSM2234364	neuropathological category: definite AD	brain region: Prefrontal Cortex	91	subject id: 215	549.541	-10.4955	-17.9381	4.23183	0.513066	1.22968	0.67637	6.20463
789	GSM2234361	neuropathological category: definite AD	brain region: Prefrontal Cortex	94	subject id: 13	564.619	23.8653	21.3834	-0.660018	-5.78169	-7.12709	-2.98827	9.78151
790	GSM2234370	neuropathological category: definite AD	brain region: Prefrontal Cortex	94	subject id: 332	567.625	30.4735	1.36199	-15.7193	-10.3462	-14.6565	-4.43089	5.15745
791	GSM2234396	neuropathological category: definite AD	brain region: Prefrontal Cortex	95	subject id: 786	565.709	13.3993	4.7589	-18.0535	-11.5621	0.86281	-4.70722	2.38913
792	GSM2234368	neuropathological category: definite AD	brain region: Prefrontal Cortex	99	subject id: 256	558.79	3.80662	12.5754	8.99327	-10.0851	-2.36808	-2.45815	-5.25373
793	GSM2234450	neuropathological category: Normal	brain region: Caudate Nucleus	66	subject id: 843	582.829	-45.1344	-8.21104	-24.2439	11.774	-13.7637	-1.28482	9.67568
794	GSM2234431	neuropathological category: Normal	brain region: Caudate Nucleus	69	subject id: 495	596.774	-17.1493	13.0435	-45.5268	6.76641	-10.1422	-2.38782	7.51911
795	GSM2234458	neuropathological category: Normal	brain region: Caudate Nucleus	69	subject id: 923	589.113	-32.6503	15.6979	-24.2155	18.2332	-10.8799	0.0501289	-3.17431
796	GSM2234432	neuropathological category: Normal	brain region: Caudate Nucleus	82	subject id: 523	598.751	-8.5879	27.6808	-37.7905	16.8039	-18.2412	9.16462	-6.27019
797	GSM2234449	neuropathological category: Normal	brain region: Caudate Nucleus	83	subject id: 842	586.945	-40.3559	-2.60492	-30.1155	13.7033	-12.4704	-4.15836	-5.35186
798	GSM2234434	neuropathological category: Normal	brain region: Caudate Nucleus	85	subject id: 551	601.844	-6.41604	29.3887	-37.9353	17.158	-12.4516	-20.1541	-16.7706
799	GSM2234447	neuropathological category: Normal	brain region: Caudate Nucleus	86	subject id: 82	590.913	-51.078	16.7021	-50.4788	-7.02525	-2.6986	23.7439	13.9907
800	GSM2234445	neuropathological category: Normal	brain region: Caudate Nucleus	89	subject id: 800	592.767	-26.8268	12.7616	-34.3216	20.3078	1.90277	-17.2123	-8.12529
801	GSM2234433	neuropathological category: Normal	brain region: Caudate Nucleus	92	subject id: 532	584.789	-62.7079	25.5777	-21.8711	4.87662	-7.39383	-4.6917	8.03828
802	GSM2234443	neuropathological category: Normal	brain region: Caudate Nucleus	95	subject id: 776	594.081	-22.2732	13.6314	-40.2888	19.8978	-12.9787	-18.7432	-6.27561
803	GSM2234438	neuropathological category: Normal	brain region: Caudate Nucleus	102	subject id: 625	577.236	-46.5207	-0.102915	-5.62759	32.1159	2.81313	-10.6966	-0.635053
804	GSM2234451	neuropathological category: Possible AD	brain region: Caudate Nucleus	79	subject id: 865	588.355	-21.9661	27.0013	-6.82492	18.7054	-11.576	11.9889	-12.7164
805	GSM2234437	neuropathological category: Possible AD	brain region: Caudate Nucleus	82	subject id: 618	583.224	-26.4367	21.8603	-1.0566	38.1823	-16.3955	8.85128	-2.39666
806	GSM2234459	neuropathological category: Possible AD	brain region: Caudate Nucleus	83	subject id: 940	578.79	-56.2851	24.7325	-12.076	10.2682	-11.7925	18.4844	-4.755
807	GSM2234439	neuropathological category: Possible AD	brain region: Caudate Nucleus	86	subject id: 639	596.332	-16.1781	22.2805	-31.9	33.4009	-8.27192	-3.63152	-15.042
808	GSM2234460	neuropathological category: Possible AD	brain region: Caudate Nucleus	88	subject id: 941	589.553	-50.4839	22.9559	-23.29	8.73846	-6.55222	-14.2238	-6.46521
809	GSM2234457	neuropathological category: Possible AD	brain region: Caudate Nucleus	89	subject id: 914	590.986	-30.3422	9.6443	-29.6662	16.3766	-13.1052	-1.95991	-13.4571
810	GSM2234448	neuropathological category: Possible AD	brain region: Caudate Nucleus	90	subject id: 83	590.704	-19.396	10.8781	-25.8617	33.8655	-21.1923	-9.59636	-5.93547
811	GSM2234456	neuropathological category: Possible AD	brain region: Caudate Nucleus	90	subject id: 892	586.781	-22.9388	20.5693	-4.72514	23.861	-28.8743	2.7717	-13.3722
812	GSM2234429	neuropathological category: Possible AD	brain region: Caudate Nucleus	91	subject id: 480	598.465	9.7029	32.6657	-25.6758	33.0136	-10.7818	-0.237297	-5.37575
813	GSM2234436	neuropathological category: Possible AD	brain region: Caudate Nucleus	91	subject id: 616	584.265	-54.3858	25.8753	0.685831	3.53392	-11.5951	-12.426	-9.95638
814	GSM2234454	neuropathological category: Possible AD	brain region: Caudate Nucleus	91	subject id: 879	594.819	-25.2505	30.7715	-34.2411	22.2641	-13.0186	-4.1995	-3.97777
815	GSM2234462	neuropathological category: Possible AD	brain region: Caudate Nucleus	96	subject id: 973	594.395	-37.2731	15.7531	-42.7066	8.76958	-11.7577	6.58	4.95525
816	GSM2234463	neuropathological category: Probable AD	brain region: Caudate Nucleus	79	subject id: 988	584.145	-43.0273	17.7645	-8.14227	16.5686	-8.7811	18.8435	-0.0730046
817	GSM2234421	neuropathological category: Probable AD	brain region: Caudate Nucleus	83	subject id: 340	575.312	-63.6747	12.8273	5.33533	7.8892	-21.0644	1.65137	-0.849081
818	GSM2234441	neuropathological category: Probable AD	brain region: Caudate Nucleus	84	subject id: 752	587.866	-40.8632	-0.0135692	-28.7745	18.3561	-10.6152	-14.4938	6.56702
819	GSM2234416	neuropathological category: Probable AD	brain region: Caudate Nucleus	86	subject id: 184	593.342	-16.0524	4.5368	-21.0852	-1.23615	-10.8968	1.5561	-7.3012
820	GSM2234455	neuropathological category: Probable AD	brain region: Caudate Nucleus	90	subject id: 882	592.085	-25.0849	23.27	-36.7641	27.5938	-9.18845	-7.66795	-7.75071
821	GSM2234461	neuropathological category: Probable AD	brain region: Caudate Nucleus	90	subject id: 963	583.901	-55.1306	15.6656	-12.2378	14.8714	-9.61013	2.70229	-6.6427
822	GSM2234423	neuropathological category: Probable AD	brain region: Caudate Nucleus	93	subject id: 367	583.992	-46.5898	-3.58805	-17.0023	11.6323	-13.8068	-2.79127	7.08627
823	GSM2234452	neuropathological category: Probable AD	brain region: Caudate Nucleus	93	subject id: 869	580.187	-53.8484	-0.381782	-14.5713	14.8345	-7.96414	-8.75711	8.6517
824	GSM2234435	neuropathological category: Probable AD	brain region: Caudate Nucleus	95	subject id: 592	594.924	-2.68281	21.566	-28.7713	39.7423	-12.1379	-3.15169	-0.724504
825	GSM2234413	neuropathological category: Probable AD	brain region: Caudate Nucleus	98	subject id: 1012	574.645	-61.5342	-0.153279	-1.43244	4.27555	5.74585	20.785	25.0019
826	GSM2234417	neuropathological category: Probable AD	brain region: Caudate Nucleus	100	subject id: 233	583.933	-34.7858	13.1137	-11.4846	23.7182	-17.8433	-4.72545	-6.37717
827	GSM2234419	neuropathological category: definite AD	brain region: Caudate Nucleus	64	subject id: 316	598.627	-28.6003	16.9227	-53.3776	10.8882	-7.26099	-7.86632	-3.84217
828	GSM2234415	neuropathological category: definite AD	brain region: Caudate Nucleus	72	subject id: 176	582.848	-50.4736	18.3034	-1.69743	-5.67267	-21.7061	17.8782	9.38181
829	GSM2234464	neuropathological category: definite AD	brain region: Caudate Nucleus	73	subject id: 989	586.479	-36.2374	13.3694	-13.7791	17.5499	-7.45436	-10.3045	-16.5946
830	GSM2234446	neuropathological category: definite AD	brain region: Caudate Nucleus	74	subject id: 801	583.803	-47.4684	5.18027	-15.9258	14.1684	-6.62784	5.89344	3.4586
831	GSM2234425	neuropathological category: definite AD	brain region: Caudate Nucleus	80	subject id: 427	588.069	-11.0991	6.02727	-26.1541	43.6007	-10.5464	5.33645	-5.57875
832	GSM2234426	neuropathological category: definite AD	brain region: Caudate Nucleus	83	subject id: 451	590.487	-36.204	26.3168	-23.8106	19.0634	-4.34056	4.67685	4.95266
833	GSM2234422	neuropathological category: definite AD	brain region: Caudate Nucleus	84	subject id: 347	595.598	-20.1531	21.6892	-39.1272	19.2504	-12.5932	1.4113	-13.2674
834	GSM2234427	neuropathological category: definite AD	brain region: Caudate Nucleus	84	subject id: 457	594.467	-8.12088	23.3882	-32.0083	39.6605	-15.4199	0.538747	-6.38758
835	GSM2234453	neuropathological category: definite AD	brain region: Caudate Nucleus	85	subject id: 870	591.77	-27.1021	10.5901	-39.377	23.5625	-11.6507	-1.51762	3.71148
836	GSM2234424	neuropathological category: definite AD	brain region: Caudate Nucleus	87	subject id: 375	590.603	-24.761	20.8119	-35.3988	28.0078	-9.80691	4.59994	-5.23986
837	GSM2234430	neuropathological category: definite AD	brain region: Caudate Nucleus	87	subject id: 488	590.772	-29.1968	-1.3982	-42.8592	19.0611	-10.1342	6.32994	12.4003
838	GSM2234442	neuropathological category: definite AD	brain region: Caudate Nucleus	87	subject id: 755	599.53	-14.3311	36.9997	-40.7393	19.4023	-9.55506	2.06744	1.98555
839	GSM2234440	neuropathological category: definite AD	brain region: Caudate Nucleus	89	subject id: 66	592.034	-35.0725	18.2785	-31.435	13.4822	3.23719	24.2637	-16.6575
840	GSM2234428	neuropathological category: definite AD	brain region: Caudate Nucleus	90	subject id: 468	582.357	-60.3116	-4.1236	-13.4411	7.55714	-5.92202	1.88278	-9.71544
841	GSM2234414	neuropathological category: definite AD	brain region: Caudate Nucleus	92	subject id: 1023	582.471	-58.1781	18.326	-11.3622	6.92583	-11.9805	8.71507	-17.4205
842	GSM2234420	neuropathological category: definite AD	brain region: Caudate Nucleus	94	subject id: 332	599.006	6.16472	31.4901	-34.7601	35.8063	-11.5269	-7.65427	-9.61484
843	GSM2234444	neuropathological category: definite AD	brain region: Caudate Nucleus	95	subject id: 786	589.201	-42.013	20.0833	-29.4861	13.874	-16.27	-5.39943	-4.0721
844	GSM2234418	neuropathological category: definite AD	brain region: Caudate Nucleus	99	subject id: 256	588.714	-20.4474	20.8782	-9.78463	38.0993	-18.8181	-8.22765	-14.2782
845	GSM2234507	neuropathological category: Normal	brain region: Hippocampus	66	subject id: 843	550.264	-63.9887	-17.762	16.611	6.09196	-0.41754	2.34212	27.5909
846	GSM2234487	neuropathological category: Normal	brain region: Hippocampus	69	subject id: 495	583.445	-3.27051	-7.82021	-31.4462	-2.5628	20.3591	1.07866	0.842972
847	GSM2234513	neuropathological category: Normal	brain region: Hippocampus	69	subject id: 923	574.98	-19.2133	4.03041	-10.8878	-5.78035	6.41729	-2.32246	6.23938
848	GSM2234471	neuropathological category: Normal	brain region: Hippocampus	70	subject id: 2010	586.859	20.8265	26.7691	-13.0942	-9.82895	-0.835783	3.06622	-8.20337
849	GSM2234517	neuropathological category: Normal	brain region: Hippocampus	74	subject id: 972	567.918	-49.7987	-3.01321	-7.47515	-9.16689	10.4002	-7.78755	11.7399
850	GSM2234488	neuropathological category: Normal	brain region: Hippocampus	82	subject id: 523	579.827	-25.7105	2.65351	-30.0524	-16.3753	8.51461	23.8218	7.05265
851	GSM2234489	neuropathological category: Normal	brain region: Hippocampus	85	subject id: 551	579.024	-2.79752	19.5124	-8.00276	-5.15683	1.44324	-16.4753	6.07576
852	GSM2234503	neuropathological category: Normal	brain region: Hippocampus	89	subject id: 800	565.139	-48.4505	-5.02868	4.11809	-1.72531	12.4902	-12.4252	8.89994
853	GSM2234500	neuropathological category: Normal	brain region: Hippocampus	95	subject id: 776	577.7	-8.35102	-0.272992	-14.3873	-2.8477	6.17357	-8.65384	4.64533
854	GSM2234472	neuropathological category: Normal	brain region: Hippocampus	96	subject id: 230	575.404	-0.128957	2.87598	3.58634	-3.85269	-7.05478	-5.60667	4.4366
855	GSM2234494	neuropathological category: Normal	brain region: Hippocampus	102	subject id: 625	575.8	-36.4345	6.92697	-23.1188	-12.2036	22.1185	4.37498	12.1766
856	GSM2234506	neuropathological category: Possible AD	brain region: Hippocampus	64	subject id: 836	581.188	12.1632	11.329	-11.1567	5.94747	9.86349	0.70419	4.41543
857	GSM2234508	neuropathological category: Possible AD	brain region: Hippocampus	79	subject id: 865	577.543	-18.552	28.9339	-12.0521	-4.8174	11.5466	-2.83579	6.60554
858	GSM2234492	neuropathological category: Possible AD	brain region: Hippocampus	82	subject id: 618	583.721	3.76963	-16.0396	-39.5237	-4.71972	-0.798093	-14.7111	8.51915
859	GSM2234480	neuropathological category: Possible AD	brain region: Hippocampus	83	subject id: 386	568.929	-47.8194	-5.62949	-21.968	-15.3343	0.729674	-1.67787	16.3481
860	GSM2234514	neuropathological category: Possible AD	brain region: Hippocampus	83	subject id: 940	569.451	-43.226	10.0659	-1.97823	-9.74528	7.35929	5.05485	5.42601
861	GSM2234496	neuropathological category: Possible AD	brain region: Hippocampus	86	subject id: 639	575.456	-29.3361	5.98136	-15.2999	-1.12614	15.3123	-10.2333	7.78966
862	GSM2234515	neuropathological category: Possible AD	brain region: Hippocampus	88	subject id: 941	569.237	-42.6959	12.9127	2.84582	-12.9536	1.98488	-3.47033	3.88211
863	GSM2234512	neuropathological category: Possible AD	brain region: Hippocampus	89	subject id: 914	572.328	-10.812	3.74422	2.62111	-0.998617	-0.453059	-12.3048	3.99591
864	GSM2234504	neuropathological category: Possible AD	brain region: Hippocampus	90	subject id: 83	585.801	15.9885	12.6453	-21.6215	-5.35586	-2.45417	-6.67248	10.1074
865	GSM2234485	neuropathological category: Possible AD	brain region: Hippocampus	91	subject id: 480	581.582	0.648521	17.9224	-13.4472	-1.80888	14.3985	8.07537	4.20532
866	GSM2234491	neuropathological category: Possible AD	brain region: Hippocampus	91	subject id: 616	558.12	-40.0429	-47.7152	9.01748	5.02464	-13.5659	-19.9227	16.8985
867	GSM2234518	neuropathological category: Possible AD	brain region: Hippocampus	96	subject id: 973	579.462	29.9514	14.3747	4.91039	1.71993	-10.8951	13.4569	7.23907
868	GSM2234465	neuropathological category: Possible AD	brain region: Hippocampus	98	subject id: 1006	575.604	-17.8303	7.04247	-5.92799	-4.55928	15.8143	-4.21376	6.94265
869	GSM2234474	neuropathological category: Possible AD	brain region: Hippocampus	99	subject id: 234	579.896	6.34002	18.6692	-1.90164	0.561849	7.24505	4.91434	-0.0460633
870	GSM2234519	neuropathological category: Probable AD	brain region: Hippocampus	79	subject id: 988	579.321	0.509672	15.3774	-10.8009	-5.32647	2.67813	9.47401	2.33289
871	GSM2234468	neuropathological category: Probable AD	brain region: Hippocampus	80	subject id: 1027	562.497	-53.4612	-0.0833783	14.2112	-12.6026	6.90104	5.52126	-9.91847
872	GSM2234502	neuropathological category: Probable AD	brain region: Hippocampus	81	subject id: 798	571.024	-34.6977	7.42133	-5.95295	-6.47347	6.43416	-8.45321	9.71105
873	GSM2234470	neuropathological category: Probable AD	brain region: Hippocampus	86	subject id: 184	575.605	-20.7803	-10.9249	-24.2507	-12.485	11.1834	18.4456	5.17278
874	GSM2234505	neuropathological category: Probable AD	brain region: Hippocampus	88	subject id: 831	562.441	-32.7136	-13.2093	3.44493	7.08237	-1.51343	-6.1105	19.1854
875	GSM2234511	neuropathological category: Probable AD	brain region: Hippocampus	90	subject id: 882	582.88	-11.0778	10.4044	-22.4456	-7.00202	10.7189	-14.6784	-9.96146
876	GSM2234516	neuropathological category: Probable AD	brain region: Hippocampus	90	subject id: 963	573.17	-15.7717	1.18725	4.32961	-1.1171	3.81607	-7.16795	-4.0855
877	GSM2234469	neuropathological category: Probable AD	brain region: Hippocampus	93	subject id: 111	578.048	-16.4906	12.6798	-5.86651	-7.51588	12.8462	-2.52619	-6.75213
878	GSM2234509	neuropathological category: Probable AD	brain region: Hippocampus	93	subject id: 869	565.742	-47.902	-8.77203	-5.97702	-9.31779	9.86028	-2.40832	7.03628
879	GSM2234490	neuropathological category: Probable AD	brain region: Hippocampus	95	subject id: 592	581.761	-2.17289	10.5128	-16.9056	8.66061	28.0415	-0.541414	8.29926
880	GSM2234466	neuropathological category: Probable AD	brain region: Hippocampus	98	subject id: 1012	574.097	-37.2406	10.5703	-8.94758	-18.4786	11.4338	9.40027	-0.0167555
881	GSM2234473	neuropathological category: Probable AD	brain region: Hippocampus	100	subject id: 233	574.054	-15.2114	10.3214	-2.72411	-4.32873	8.38386	0.679943	0.836135
882	GSM2234476	neuropathological category: definite AD	brain region: Hippocampus	64	subject id: 316	571.26	-46.9803	0.289047	-14.655	-19.5581	3.73635	4.65616	14.7254
883	GSM2234481	neuropathological category: definite AD	brain region: Hippocampus	80	subject id: 427	586.451	10.3725	24.4442	-25.0289	-0.440329	15.5287	1.34569	6.80768
884	GSM2234482	neuropathological category: definite AD	brain region: Hippocampus	83	subject id: 451	574.583	-17.8133	17.7798	-1.29491	-9.28674	6.56277	3.74707	2.40451
885	GSM2234478	neuropathological category: definite AD	brain region: Hippocampus	84	subject id: 347	578.377	-5.07815	8.75078	-17.4969	-5.98455	0.538677	-13.7192	2.68302
886	GSM2234483	neuropathological category: definite AD	brain region: Hippocampus	84	subject id: 457	584.803	17.4723	21.6321	-24.6814	-2.45433	-3.19227	7.26003	16.0935
887	GSM2234493	neuropathological category: definite AD	brain region: Hippocampus	85	subject id: 623	567.883	-30.5283	-26.6082	-9.72197	-1.33038	-3.04415	-6.20168	15.0672
888	GSM2234510	neuropathological category: definite AD	brain region: Hippocampus	85	subject id: 870	576.362	-41.955	-4.33972	-43.6388	-15.6442	10.0478	8.65654	35.5612
889	GSM2234479	neuropathological category: definite AD	brain region: Hippocampus	87	subject id: 375	576.207	-43.1306	1.69311	-41.7735	-23.0221	-5.22982	6.31614	23.545
890	GSM2234484	neuropathological category: definite AD	brain region: Hippocampus	87	subject id: 462	581.127	-18.1654	14.365	-19.7796	-9.36032	16.5694	-9.36477	-3.34818
891	GSM2234486	neuropathological category: definite AD	brain region: Hippocampus	87	subject id: 488	584.657	-6.01292	7.26876	-24.9044	-11.1138	22.5318	-1.40616	-6.66422
892	GSM2234498	neuropathological category: definite AD	brain region: Hippocampus	87	subject id: 671	564.072	-41.1139	-6.77856	8.44654	-0.729816	6.68606	-13.9293	3.23728
893	GSM2234499	neuropathological category: definite AD	brain region: Hippocampus	87	subject id: 755	571.688	-27.769	7.14212	-5.85308	1.08949	12.9401	-10.9165	10.8152
894	GSM2234495	neuropathological category: definite AD	brain region: Hippocampus	88	subject id: 626	575.746	-23.2558	-29.4044	-35.085	-9.3118	-4.6143	-28.2875	9.10378
895	GSM2234497	neuropathological category: definite AD	brain region: Hippocampus	89	subject id: 66	583.852	8.27705	21.0552	-14.456	-10.9565	-3.24745	1.48504	9.84437
896	GSM2234467	neuropathological category: definite AD	brain region: Hippocampus	92	subject id: 1023	565.206	-38.6465	-0.964405	18.5108	-7.87389	5.71805	-4.59546	-9.64443
897	GSM2234477	neuropathological category: definite AD	brain region: Hippocampus	94	subject id: 332	588.888	28.6482	13.8226	-20.3997	-2.054	8.05077	-3.20388	-5.69474
898	GSM2234501	neuropathological category: definite AD	brain region: Hippocampus	95	subject id: 786	563.644	-53.4774	-3.91919	-10.8708	-3.13619	8.36147	-3.17331	20.138
899	GSM2234475	neuropathological category: definite AD	brain region: Hippocampus	99	subject id: 256	573.754	-21.796	6.85127	5.37071	-6.27353	8.52669	-5.61565	-7.17374
900	GSM2234558	neuropathological category: Normal	brain region: Putamen	66	subject id: 843	576.235	-43.3803	-0.875061	-27.2506	-7.87622	-2.56968	12.4034	3.28662
901	GSM2234540	neuropathological category: Normal	brain region: Putamen	69	subject id: 495	586.034	7.55305	18.6374	-28.7554	15.2124	-12.7097	-4.56416	-7.12917
902	GSM2234524	neuropathological category: Normal	brain region: Putamen	70	subject id: 2010	576.682	-38.8162	8.19941	-26.2365	6.05769	7.29789	1.55368	5.19607
903	GSM2234541	neuropathological category: Normal	brain region: Putamen	82	subject id: 523	593.593	24.5993	27.5329	-28.1259	1.03324	-8.80735	7.75933	-10.9691
904	GSM2234543	neuropathological category: Normal	brain region: Putamen	85	subject id: 551	591.322	-9.00738	32.095	-40.9846	3.05354	-8.82761	-3.40186	-9.9591
905	GSM2234554	neuropathological category: Normal	brain region: Putamen	89	subject id: 800	580.822	-27.0534	18.199	-26.9695	9.14635	2.00416	-9.41773	-3.32825
906	GSM2234542	neuropathological category: Normal	brain region: Putamen	92	subject id: 532	573.05	-55.4978	22.4278	-19.2283	5.13705	-6.92024	-3.36886	1.23219
907	GSM2234526	neuropathological category: Normal	brain region: Putamen	96	subject id: 230	577.102	-19.5243	2.64477	-13.2939	34.1961	-7.60057	-0.808596	-20.5412
908	GSM2234548	neuropathological category: Normal	brain region: Putamen	102	subject id: 625	587.735	-25.9982	13.0654	-45.3104	0.757615	-4.8821	-5.6511	-18.5228
909	GSM2234557	neuropathological category: Possible AD	brain region: Putamen	64	subject id: 836	583.064	-27.8459	17.2853	-36.6204	7.63628	-16.7725	8.01954	-2.53015
910	GSM2234559	neuropathological category: Possible AD	brain region: Putamen	79	subject id: 865	579.478	-11.4004	16.6429	-9.5014	15.7751	-6.25951	15.8592	-17.8032
911	GSM2234547	neuropathological category: Possible AD	brain region: Putamen	82	subject id: 618	579.686	-17.1308	30.4294	-7.98555	22.0381	-18.1874	0.44217	-1.1331
912	GSM2234565	neuropathological category: Possible AD	brain region: Putamen	83	subject id: 940	577.428	-42.9331	22.5884	-18.1715	5.86556	-17.9532	13.629	-3.13882
913	GSM2234549	neuropathological category: Possible AD	brain region: Putamen	86	subject id: 639	586.692	-9.58544	14.4739	-34.8008	13.9117	-6.4577	-1.76669	-5.43419
914	GSM2234566	neuropathological category: Possible AD	brain region: Putamen	88	subject id: 941	573.029	-47.0384	16.6049	-9.96039	7.28816	-9.57655	2.15734	-16.5639
915	GSM2234555	neuropathological category: Possible AD	brain region: Putamen	90	subject id: 83	591.276	1.48052	30.9181	-43.332	24.1569	-13.1647	-0.594332	-14.5955
916	GSM2234538	neuropathological category: Possible AD	brain region: Putamen	91	subject id: 480	580.391	-29.6617	12.0388	-21.7629	18.2658	-3.64171	24.6588	-13.0618
917	GSM2234546	neuropathological category: Possible AD	brain region: Putamen	91	subject id: 616	543.444	-83.5929	8.04952	15.2137	1.74696	-23.3719	10.0245	-22.4964
918	GSM2234562	neuropathological category: Possible AD	brain region: Putamen	91	subject id: 879	581.412	-29.6337	21.1471	-30.7564	14.4403	-17.3117	8.37297	-4.18368
919	GSM2234520	neuropathological category: Possible AD	brain region: Putamen	98	subject id: 1006	573.096	-65.4159	13.5145	-26.8388	-13.4831	5.27917	27.8517	6.70809
920	GSM2234527	neuropathological category: Possible AD	brain region: Putamen	99	subject id: 234	580.847	-22.5781	9.49979	-27.3273	14.7859	-12.1994	22.4333	-0.172802
921	GSM2234569	neuropathological category: Probable AD	brain region: Putamen	79	subject id: 988	578.779	-31.7709	12.9535	-25.8831	9.99621	-7.48524	7.24384	-5.66708
922	GSM2234522	neuropathological category: Probable AD	brain region: Putamen	80	subject id: 1027	575.128	-52.4754	16.5777	-15.5877	-2.14661	-5.32457	20.7454	-12.1326
923	GSM2234551	neuropathological category: Probable AD	brain region: Putamen	84	subject id: 752	573.878	-37.1227	-4.03955	-22.8506	24.0802	-16.7301	-7.67097	0.971787
924	GSM2234564	neuropathological category: Probable AD	brain region: Putamen	85	subject id: 902	576.624	-59.5159	5.48445	-32.928	0.634912	6.51741	-6.13538	0.397665
925	GSM2234523	neuropathological category: Probable AD	brain region: Putamen	86	subject id: 184	573.149	-46.3187	-13.3886	-22.6054	5.85526	-12.9041	21.7115	-1.22593
926	GSM2234556	neuropathological category: Probable AD	brain region: Putamen	88	subject id: 831	572.2	-46.3596	-10.4502	-20.3126	16.2338	0.926505	2.28644	2.91917
927	GSM2234563	neuropathological category: Probable AD	brain region: Putamen	90	subject id: 882	584.471	-21.1328	10.3644	-41.4854	23.5896	-4.07836	-4.38507	-4.29419
928	GSM2234567	neuropathological category: Probable AD	brain region: Putamen	90	subject id: 963	573.706	-50.8429	13.7564	-18.8202	6.37167	-7.27171	9.60437	-11.4265
929	GSM2234560	neuropathological category: Probable AD	brain region: Putamen	93	subject id: 869	561.156	-58.2641	-18.4877	-8.41063	13.1246	-4.59256	9.87393	30.3583
930	GSM2234545	neuropathological category: Probable AD	brain region: Putamen	95	subject id: 592	585.657	-15.2792	30.8495	-28.074	6.90428	-3.73348	17.0918	-5.45557
931	GSM2234521	neuropathological category: Probable AD	brain region: Putamen	98	subject id: 1012	571.329	-53.415	14.1112	-7.10426	0.698882	-7.27839	22.248	-13.8135
932	GSM2234530	neuropathological category: definite AD	brain region: Putamen	64	subject id: 316	574.028	-40.6189	0.41193	-18.8931	15.2782	-13.5179	5.12168	-8.57434
933	GSM2234570	neuropathological category: definite AD	brain region: Putamen	73	subject id: 989	568.142	-56.2411	3.41395	-11.7848	4.60584	-8.28874	9.43824	-10.0454
934	GSM2234534	neuropathological category: definite AD	brain region: Putamen	80	subject id: 427	584.496	-3.87637	20.3838	-37.9147	29.0652	-16.1932	5.0286	-0.716567
935	GSM2234532	neuropathological category: definite AD	brain region: Putamen	84	subject id: 364	579.519	-32.7843	5.66338	-23.1671	13.8183	-2.30013	-3.13424	-16.7675
936	GSM2234535	neuropathological category: definite AD	brain region: Putamen	84	subject id: 457	591.017	-4.84413	29.4295	-46.1679	22.2052	-7.93507	2.10215	-10.0283
937	GSM2234561	neuropathological category: definite AD	brain region: Putamen	85	subject id: 870	577.486	-39.5751	7.61093	-30.9549	11.2714	-15.6286	15.3936	1.25796
938	GSM2234533	neuropathological category: definite AD	brain region: Putamen	87	subject id: 375	579.262	-22.33	8.37728	-31.8386	22.0218	-19.7593	4.03277	-16.1644
939	GSM2234536	neuropathological category: definite AD	brain region: Putamen	87	subject id: 462	582.701	-34.1937	11.1465	-34.2555	13.1555	2.98046	1.76633	-26.1864
940	GSM2234539	neuropathological category: definite AD	brain region: Putamen	87	subject id: 488	585.563	-15.7439	8.62678	-42.6891	14.0781	-5.29871	6.70807	-0.619567
941	GSM2234552	neuropathological category: definite AD	brain region: Putamen	87	subject id: 755	584.364	-34.1954	23.6154	-46.2199	-2.17617	-6.44147	16.0225	7.46476
942	GSM2234571	neuropathological category: definite AD	brain region: Putamen	88	subject id: 992	570.791	-59.016	8.49692	-20.31	-8.89768	-1.82075	30.4934	-5.06498
943	GSM2234544	neuropathological category: definite AD	brain region: Putamen	89	subject id: 571	588.805	-4.03801	25.6346	-38.9575	25.3526	-11.5009	7.78285	-12.6179
944	GSM2234550	neuropathological category: definite AD	brain region: Putamen	89	subject id: 66	573.312	-37.766	4.58385	-21.3097	20.8491	-1.17477	30.8669	3.57206
945	GSM2234537	neuropathological category: definite AD	brain region: Putamen	90	subject id: 468	570.076	-55.609	-5.08839	-6.78701	1.1226	-4.4399	-4.6152	0.312279
946	GSM2234568	neuropathological category: definite AD	brain region: Putamen	90	subject id: 975	561.037	-63.8197	0.663877	1.28419	11.2023	-1.32557	0.855027	-4.61999
947	GSM2234525	neuropathological category: definite AD	brain region: Putamen	91	subject id: 215	578.126	-42.8253	18.5736	-22.4577	-5.99956	-4.93257	18.4341	6.05996
948	GSM2234529	neuropathological category: definite AD	brain region: Putamen	92	subject id: 273	586	-18.7673	10.9347	-39.5893	10.9595	-4.31518	-7.58792	-13.847
949	GSM2234531	neuropathological category: definite AD	brain region: Putamen	94	subject id: 332	591.758	16.5855	23.9921	-41.9442	10.3876	-8.04561	8.15747	-5.74439
950	GSM2234553	neuropathological category: definite AD	brain region: Putamen	95	subject id: 786	586.929	-27.7906	21.8025	-52.3683	-0.0523457	-2.06813	0.72979	4.36311
951	GSM2234528	neuropathological category: definite AD	brain region: Putamen	99	subject id: 256	584.586	-29.6791	32.4593	-27.536	7.06735	-12.6394	10.8778	-12.2128
