# Supplementary material for: Exploring Alzheimer’s Disease Molecular Variability via Calculation of Personalized Transcriptional Signatures
Source: Biomolecules. 2020 Mar 26;10(4):503. doi: 10.3390/biom10040503 (PMC7226317; doi:10.3390/biom10040503)
Supplement: Supplementary file 1 [file biomolecules-10-00503-s001.zip › suppl/Supp Table 4.xlsx]

## Sheet: List of 52 barcodes
Barcode ID	Barcode	Specificity (Red = AD-specific; green = non AD-specific; gray = Non-specific)	Is this barcode rare? (i.e. appears in 2 samples or less)	% of AD samples out of total samples harboring this barcode	% of normal samples out of total samples harboring this barcode	Number of normal samples characterized by this barcode	Number of definite AD samples characterized by this barcode	Number of probable AD samples characterized by this barcode	Number of possible AD samples characterized by this barcode	Total number of samples characterized by this barcode
1	[ 0. 0. 0. 0. 0. 0. 0.]	Non-specific	No	75	25	99	123	77	97	396
2	[-1. 0. 0. 0. 0. 0. 0.]	Non-specific	No	89.0244	10.9756	9	40	21	12	82
3	[-1. 0. 0. 0. 0. 0. 1.]	Non-specific	No	66.6667	33.3333	1	0	2	0	3
4	[-1. 0. 0. 1. 0. 0. 0.]	Non-specific	No	66.6667	33.3333	1	0	1	1	3
5	[-1. 0. -1. 0. 0. 1. 0.]	AD	Yes	100	0	0	1	0	1	2
6	[-1. 1. 0. 0. 0. -1. 0.]	AD	Yes	100	0	0	0	1	0	1
7	[ 0. 0. 0. 0. -1. 0. 0.]	AD	No	100	0	0	0	5	4	9
8	[ 0. 1. -1. 0. 0. 0. 0.]	Non-specific	No	57.1429	42.8571	3	3	1	0	7
9	[-1. 0. 0. 0. 1. 1. 0.]	AD	Yes	100	0	0	1	0	0	1
10	[ 1. 0. 0. 0. 0. 0. 0.]	Non-specific	No	75.7009	24.2991	26	40	10	31	107
11	[-1. 0. 1. 0. 0. -1. 0.]	AD	Yes	100	0	0	1	0	0	1
12	[ 1. 0. -1. 0. 0. 0. 0.]	Non-specific	No	60	40	2	2	0	1	5
13	[-1. 0. -1. 1. 0. 0. 0.]	AD	Yes	100	0	0	1	1	0	2
14	[-1. 0. 0. -1. 0. 0. 0.]	AD	Yes	100	0	0	1	1	0	2
15	[-1. -1. 1. 0. 0. 0. 0.]	Non-specific	No	40	60	3	2	0	0	5
16	[ 0. -1. 1. 0. -1. 0. 0.]	AD	Yes	100	0	0	0	1	0	1
17	[-1. 0. 0. 0. 0. 1. 0.]	AD	No	100	0	0	2	0	1	3
18	[ 0. -1. 0. 0. -1. 0. 0.]	AD	Yes	100	0	0	0	1	0	1
19	[ 0. 0. -1. 0. 0. 0. 0.]	Non-specific	No	64.2857	35.7143	10	11	3	4	28
20	[ 0. 0. 1. 1. 0. 0. 0.]	Non-specific	Yes	50	50	1	0	0	1	2
21	[ 1. 1. 1. 0. 0. 0. 0.]	AD	Yes	100	0	0	0	0	1	1
22	[ 0. 1. 1. 0. 0. 0. 0.]	AD	Yes	100	0	0	0	0	1	1
23	[ 0. 0. 1. 0. -1. 0. 0.]	AD	No	100	0	0	0	2	1	3
24	[ 0. 0. 0. 1. 0. 0. 0.]	Non-specific	Yes	50	50	1	1	0	0	2
25	[ 0. 1. 0. 0. 0. 0. 0.]	Non-specific	No	92.1053	7.89474	3	10	10	15	38
26	[ 0. 0. -1. 1. 0. 0. 0.]	AD	No	100	0	0	3	1	2	6
27	[ 1. -1. 0. 0. 0. 0. 0.]	Non-specific	No	82.3529	17.6471	3	5	0	9	17
28	[ 0. 0. 0. -1. 0. 0. 0.]	AD	No	100	0	0	1	1	2	4
29	[ 0. -1. 1. 0. 0. 0. 0.]	Non-specific	No	50	50	2	2	0	0	4
30	[-1. 0. 1. 0. 0. 0. 0.]	Non-specific	No	84.6154	15.3846	2	3	4	4	13
31	[ 1. 0. -1. 0. 0. -1. 0.]	AD	Yes	100	0	0	0	0	1	1
32	[ 0. 1. -1. 1. 0. 0. 0.]	AD	No	100	0	0	2	0	2	4
33	[ 0. 0. 0. 0. 1. 0. 0.]	AD	No	100	0	0	3	1	1	5
34	[ 1. 0. 0. 0. -1. 0. 0.]	AD	No	100	0	0	0	1	2	3
35	[ 1. 0. 1. 1. 0. 0. 0.]	AD	Yes	100	0	0	0	0	1	1
36	[-1. 0. 0. 0. 0. -1. 0.]	AD	Yes	100	0	0	0	1	1	2
37	[ 1. -1. -1. 0. 0. 0. 0.]	AD	Yes	100	0	0	2	0	0	2
38	[-1. -1. 0. 0. 0. 0. 0.]	Non-specific	No	73.3333	26.6667	4	5	5	1	15
39	[ 0. -1. -1. 0. 0. -1. 0.]	AD	Yes	100	0	0	1	0	1	2
40	[-1. 0. -1. 0. 0. 0. 0.]	Non-specific	No	60	40	10	8	3	4	25
41	[-1. 1. 0. 0. 0. 0. 0.]	Non-specific	No	75	25	1	1	0	2	4
42	[ 1. 1. -1. 0. 0. 0. 0.]	Normal	Yes	0	100	1	0	0	0	1
43	[-1. 0. -1. 0. 0. 0. 1.]	AD	Yes	100	0	0	1	0	0	1
44	[ 0. -1. -1. 0. 0. 0. 0.]	AD	No	100	0	0	1	1	1	3
45	[-1. 0. -1. 0. 0. 0. -1.]	AD	Yes	100	0	0	1	0	0	1
46	[ 1. 1. 0. 0. 0. 0. 0.]	Non-specific	No	83.3333	16.6667	1	1	1	3	6
47	[-1. 1. -1. 0. 0. 0. 0.]	AD	Yes	100	0	0	1	0	1	2
48	[ 1. 0. 0. 0. 1. 0. 0.]	AD	Yes	100	0	0	0	0	1	1
49	[ 0. 1. 0. 0. -1. 0. 0.]	AD	Yes	100	0	0	0	0	1	1
50	[ 0. 0. 1. 0. 0. 0. 0.]	Non-specific	No	82.8571	17.1429	6	11	9	9	35
51	[ 0. 0. 0. 0. 0. -1. 0.]	AD	Yes	100	0	0	0	0	1	1
52	[ 0. -1. 0. 0. 0. 0. 0.]	Non-specific	No	70.5882	29.4118	25	37	15	8	85

## Sheet: Sample-specific barcodes
Sample #	Subject ID	Barcode	Barcode ID	Age	Neuropathological category	Brain Region
1	1018	[ 1. 0. 0. 0. 0. 0. 0.]	10	60	Normal	Frontal Pole
2	990	[ 1. 0. 0. 0. 0. 0. 0.]	10	62	Normal	Frontal Pole
3	843	[ 0. -1. 0. 0. 0. 0. 0.]	52	66	Normal	Frontal Pole
4	495	[ 0. -1. 0. 0. 0. 0. 0.]	52	69	Normal	Frontal Pole
5	923	[ 0. 0. 0. 0. 0. 0. 0.]	1	69	Normal	Frontal Pole
6	2010	[ 0. 0. 0. 0. 0. 0. 0.]	1	70	Normal	Frontal Pole
7	523	[ 1. 0. 0. 0. 0. 0. 0.]	10	82	Normal	Frontal Pole
8	842	[ 0. 0. 0. 0. 0. 0. 0.]	1	83	Normal	Frontal Pole
9	1039	[ 0. 0. 0. 0. 0. 0. 0.]	1	85	Normal	Frontal Pole
10	551	[ 1. 0. 0. 0. 0. 0. 0.]	10	85	Normal	Frontal Pole
11	82	[ 1. 0. 0. 0. 0. 0. 0.]	10	86	Normal	Frontal Pole
12	800	[ 0. -1. 0. 0. 0. 0. 0.]	52	89	Normal	Frontal Pole
13	776	[ 0. -1. 0. 0. 0. 0. 0.]	52	95	Normal	Frontal Pole
14	230	[ 1. -1. 0. 0. 0. 0. 0.]	27	96	Normal	Frontal Pole
15	625	[ 0. 0. 0. 0. 0. 0. 0.]	1	102	Normal	Frontal Pole
16	836	[ 1. -1. 0. 0. 0. 0. 0.]	27	64	Possible AD	Frontal Pole
17	865	[ 0. 0. 0. 0. 0. 0. 0.]	1	79	Possible AD	Frontal Pole
18	618	[ 1. -1. 0. 0. 0. 0. 0.]	27	82	Possible AD	Frontal Pole
19	940	[ 0. 0. 0. 0. 0. 0. 0.]	1	83	Possible AD	Frontal Pole
20	639	[ 0. -1. 0. 0. 0. 0. 0.]	52	86	Possible AD	Frontal Pole
21	941	[ 0. 0. 1. 0. 0. 0. 0.]	50	88	Possible AD	Frontal Pole
22	914	[ 1. 0. 0. 0. 0. 0. 0.]	10	89	Possible AD	Frontal Pole
23	83	[ 1. 0. 0. 0. 0. 0. 0.]	10	90	Possible AD	Frontal Pole
24	892	[ 0. 1. 0. 0. 0. 0. 0.]	25	90	Possible AD	Frontal Pole
25	480	[ 1. -1. 0. 0. 0. 0. 0.]	27	91	Possible AD	Frontal Pole
26	616	[ 0. -1. 0. 0. 0. 0. 0.]	52	91	Possible AD	Frontal Pole
27	1006	[ 0. 0. 0. 0. 0. 0. 0.]	1	98	Possible AD	Frontal Pole
28	234	[ 1. 0. 0. 0. 0. 0. 0.]	10	99	Possible AD	Frontal Pole
29	988	[ 1. 0. 0. 0. 0. 0. 0.]	10	79	Probable AD	Frontal Pole
30	1027	[ 0. 0. 0. 0. 0. 0. 0.]	1	80	Probable AD	Frontal Pole
31	340	[ 0. 0. 0. 0. 0. 0. 0.]	1	83	Probable AD	Frontal Pole
32	752	[ 0. -1. 0. 0. 0. 0. 0.]	52	84	Probable AD	Frontal Pole
33	184	[ 1. 0. 0. 0. 0. 0. 0.]	10	86	Probable AD	Frontal Pole
34	882	[ 0. -1. 0. 0. 0. 0. 0.]	52	90	Probable AD	Frontal Pole
35	963	[ 0. 0. 1. 0. 0. 0. 0.]	50	90	Probable AD	Frontal Pole
36	111	[ 0. 0. 1. 0. 0. 0. 0.]	50	93	Probable AD	Frontal Pole
37	367	[ 0. -1. 0. 0. 0. 0. 0.]	52	93	Probable AD	Frontal Pole
38	869	[ 0. 0. 0. 0. 0. 0. 0.]	1	93	Probable AD	Frontal Pole
39	592	[ 0. 0. 0. 0. 0. 0. 0.]	1	95	Probable AD	Frontal Pole
40	316	[ 0. -1. 0. 0. 0. 0. 0.]	52	64	definite AD	Frontal Pole
41	790	[-1. 0. 1. 0. 0. -1. 0.]	11	73	definite AD	Frontal Pole
42	427	[ 1. 0. 0. 0. 0. 0. 0.]	10	80	definite AD	Frontal Pole
43	451	[ 0. 0. 0. 0. 0. 0. 0.]	1	83	definite AD	Frontal Pole
44	347	[ 1. 0. 0. 0. 0. 0. 0.]	10	84	definite AD	Frontal Pole
45	364	[ 0. 0. 0. 0. 0. 0. 0.]	1	84	definite AD	Frontal Pole
46	457	[ 0. -1. 0. 0. 0. 0. 0.]	52	84	definite AD	Frontal Pole
47	623	[ 1. -1. -1. 0. 0. 0. 0.]	37	85	definite AD	Frontal Pole
48	870	[ 1. -1. 0. 0. 0. 0. 0.]	27	85	definite AD	Frontal Pole
49	375	[ 0. 0. 0. 0. 0. 0. 0.]	1	87	definite AD	Frontal Pole
50	462	[ 0. -1. 0. 0. 0. 0. 0.]	52	87	definite AD	Frontal Pole
51	488	[ 0. 0. 0. 0. 0. 0. 0.]	1	87	definite AD	Frontal Pole
52	755	[ 0. 0. 0. 0. 0. 0. 0.]	1	87	definite AD	Frontal Pole
53	992	[-1. 0. 0. 0. 0. 0. 0.]	2	88	definite AD	Frontal Pole
54	571	[ 1. 0. 0. 0. 0. 0. 0.]	10	89	definite AD	Frontal Pole
55	66	[ 0. -1. 0. 0. 0. 0. 0.]	52	89	definite AD	Frontal Pole
56	975	[-1. 0. 0. 0. 0. 0. 0.]	2	90	definite AD	Frontal Pole
57	215	[ 0. 0. 0. 0. 0. 0. 0.]	1	91	definite AD	Frontal Pole
58	1023	[ 0. 0. 0. 0. 0. 0. 0.]	1	92	definite AD	Frontal Pole
59	273	[ 0. 0. 0. 0. 0. 0. 0.]	1	92	definite AD	Frontal Pole
60	332	[ 1. 0. 0. 0. 0. 0. 0.]	10	94	definite AD	Frontal Pole
61	786	[ 0. -1. 0. 0. 0. 0. 0.]	52	95	definite AD	Frontal Pole
62	256	[ 1. 0. 0. 0. 0. 0. 0.]	10	99	definite AD	Frontal Pole
63	370	[ 0. 0. 0. 0. 0. 0. 0.]	1	100	definite AD	Frontal Pole
64	843	[ 0. -1. 0. 0. 0. 0. 0.]	52	66	Normal	Occipital Visual Cortex
65	495	[ 0. 0. 0. 0. 0. 0. 0.]	1	69	Normal	Occipital Visual Cortex
66	923	[ 0. 0. 0. 0. 0. 0. 0.]	1	69	Normal	Occipital Visual Cortex
67	2010	[ 0. 0. 0. 0. 0. 0. 0.]	1	70	Normal	Occipital Visual Cortex
68	972	[ 0. -1. 0. 0. 0. 0. 0.]	52	74	Normal	Occipital Visual Cortex
69	523	[ 0. 0. 0. 0. 0. 0. 0.]	1	82	Normal	Occipital Visual Cortex
70	842	[ 0. -1. 0. 0. 0. 0. 0.]	52	83	Normal	Occipital Visual Cortex
71	684	[-1. -1. 0. 0. 0. 0. 0.]	38	84	Normal	Occipital Visual Cortex
72	551	[ 0. 0. 0. 0. 0. 0. 0.]	1	85	Normal	Occipital Visual Cortex
73	82	[ 0. 0. 0. 0. 0. 0. 0.]	1	86	Normal	Occipital Visual Cortex
74	800	[ 0. -1. 0. 0. 0. 0. 0.]	52	89	Normal	Occipital Visual Cortex
75	776	[ 0. 0. 0. 0. 0. 0. 0.]	1	95	Normal	Occipital Visual Cortex
76	625	[-1. -1. 1. 0. 0. 0. 0.]	15	102	Normal	Occipital Visual Cortex
77	836	[ 0. -1. 0. 0. 0. 0. 0.]	52	64	Possible AD	Occipital Visual Cortex
78	865	[ 1. 0. 0. 0. -1. 0. 0.]	34	79	Possible AD	Occipital Visual Cortex
79	618	[ 0. 0. 1. 0. -1. 0. 0.]	23	82	Possible AD	Occipital Visual Cortex
80	804	[ 0. 0. 0. 0. -1. 0. 0.]	7	82	Possible AD	Occipital Visual Cortex
81	639	[ 0. 0. 0. 0. 0. 0. 0.]	1	86	Possible AD	Occipital Visual Cortex
82	941	[-1. 0. 1. 0. 0. 0. 0.]	30	88	Possible AD	Occipital Visual Cortex
83	914	[ 1. 0. 0. 0. 0. 0. 0.]	10	89	Possible AD	Occipital Visual Cortex
84	83	[ 0. 0. 0. 0. 0. 0. 0.]	1	90	Possible AD	Occipital Visual Cortex
85	892	[ 0. 0. 0. 0. -1. 0. 0.]	7	90	Possible AD	Occipital Visual Cortex
86	480	[ 1. -1. 0. 0. 0. 0. 0.]	27	91	Possible AD	Occipital Visual Cortex
87	879	[ 0. 0. 0. 0. -1. 0. 0.]	7	91	Possible AD	Occipital Visual Cortex
88	973	[ 0. 0. 0. 0. 0. 0. 0.]	1	96	Possible AD	Occipital Visual Cortex
89	1006	[ 0. 0. 0. 0. 0. 0. 0.]	1	98	Possible AD	Occipital Visual Cortex
90	234	[ 1. 0. 0. 0. -1. 0. 0.]	34	99	Possible AD	Occipital Visual Cortex
91	988	[ 0. 0. 0. 0. 0. 0. 0.]	1	79	Probable AD	Occipital Visual Cortex
92	750	[ 1. 0. 0. 0. -1. 0. 0.]	34	84	Probable AD	Occipital Visual Cortex
93	504	[ 0. 0. 1. 0. -1. 0. 0.]	23	85	Probable AD	Occipital Visual Cortex
94	184	[ 0. -1. 0. 0. 0. 0. 0.]	52	86	Probable AD	Occipital Visual Cortex
95	831	[-1. -1. 0. 0. 0. 0. 0.]	38	88	Probable AD	Occipital Visual Cortex
96	882	[ 0. -1. 0. 0. 0. 0. 0.]	52	90	Probable AD	Occipital Visual Cortex
97	665	[ 0. 0. 1. 0. -1. 0. 0.]	23	92	Probable AD	Occipital Visual Cortex
98	869	[-1. -1. 0. 0. 0. 0. 0.]	38	93	Probable AD	Occipital Visual Cortex
99	956	[ 0. 0. 0. 0. 0. 0. 0.]	1	93	Probable AD	Occipital Visual Cortex
100	709	[ 0. 0. 0. 0. -1. 0. 0.]	7	94	Probable AD	Occipital Visual Cortex
101	592	[ 0. -1. 0. 0. -1. 0. 0.]	18	95	Probable AD	Occipital Visual Cortex
102	697	[-1. 0. 0. 0. 0. 0. 0.]	2	100	Probable AD	Occipital Visual Cortex
103	427	[ 0. -1. 0. 0. 0. 0. 0.]	52	80	definite AD	Occipital Visual Cortex
104	451	[ 0. 0. 0. 0. 0. 0. 0.]	1	83	definite AD	Occipital Visual Cortex
105	457	[ 1. 0. 0. 0. 0. 0. 0.]	10	84	definite AD	Occipital Visual Cortex
106	870	[ 0. 0. 0. 0. 0. 0. 0.]	1	85	definite AD	Occipital Visual Cortex
107	375	[ 0. -1. 1. 0. 0. 0. 0.]	29	87	definite AD	Occipital Visual Cortex
108	462	[ 1. 0. 0. 0. 0. 0. 0.]	10	87	definite AD	Occipital Visual Cortex
109	626	[-1. 0. 1. 0. 0. 0. 0.]	30	88	definite AD	Occipital Visual Cortex
110	571	[ 0. -1. 0. 0. 0. 0. 0.]	52	89	definite AD	Occipital Visual Cortex
111	66	[ 0. -1. 0. 0. 0. 0. 0.]	52	89	definite AD	Occipital Visual Cortex
112	215	[ 0. -1. 0. 0. 0. 0. 0.]	52	91	definite AD	Occipital Visual Cortex
113	1023	[ 0. 0. 0. -1. 0. 0. 0.]	28	92	definite AD	Occipital Visual Cortex
114	13	[ 1. 0. 0. 0. 0. 0. 0.]	10	94	definite AD	Occipital Visual Cortex
115	332	[ 1. -1. 0. 0. 0. 0. 0.]	27	94	definite AD	Occipital Visual Cortex
116	505	[ 1. 0. 0. 0. 0. 0. 0.]	10	94	definite AD	Occipital Visual Cortex
117	1018	[ 0. 0. 0. 0. 0. 0. 0.]	1	60	Normal	Inferior Temporal Gyrus
118	990	[ 0. 0. 1. 0. 0. 0. 0.]	50	62	Normal	Inferior Temporal Gyrus
119	843	[ 0. -1. 0. 0. 0. 0. 0.]	52	66	Normal	Inferior Temporal Gyrus
120	495	[ 0. -1. 0. 0. 0. 0. 0.]	52	69	Normal	Inferior Temporal Gyrus
121	923	[ 0. 0. 0. 0. 0. 0. 0.]	1	69	Normal	Inferior Temporal Gyrus
122	523	[ 0. -1. 0. 0. 0. 0. 0.]	52	82	Normal	Inferior Temporal Gyrus
123	842	[ 0. 0. 0. 0. 0. 0. 0.]	1	83	Normal	Inferior Temporal Gyrus
124	1039	[ 0. 0. 1. 0. 0. 0. 0.]	50	85	Normal	Inferior Temporal Gyrus
125	551	[ 0. 0. 0. 0. 0. 0. 0.]	1	85	Normal	Inferior Temporal Gyrus
126	82	[ 0. 0. 0. 0. 0. 0. 0.]	1	86	Normal	Inferior Temporal Gyrus
127	800	[-1. -1. 1. 0. 0. 0. 0.]	15	89	Normal	Inferior Temporal Gyrus
128	776	[-1. -1. 0. 0. 0. 0. 0.]	38	95	Normal	Inferior Temporal Gyrus
129	230	[ 1. 0. 0. 0. 0. 0. 0.]	10	96	Normal	Inferior Temporal Gyrus
130	625	[-1. -1. 0. 0. 0. 0. 0.]	38	102	Normal	Inferior Temporal Gyrus
131	836	[ 1. -1. 0. 0. 0. 0. 0.]	27	64	Possible AD	Inferior Temporal Gyrus
132	865	[ 0. 0. 0. 0. 0. 0. 0.]	1	79	Possible AD	Inferior Temporal Gyrus
133	360	[ 0. 0. 0. 0. 0. 0. 0.]	1	82	Possible AD	Inferior Temporal Gyrus
134	618	[ 0. 0. 0. 0. 1. 0. 0.]	33	82	Possible AD	Inferior Temporal Gyrus
135	940	[-1. 0. 1. 0. 0. 0. 0.]	30	83	Possible AD	Inferior Temporal Gyrus
136	639	[ 0. 0. 0. 0. 0. 0. 0.]	1	86	Possible AD	Inferior Temporal Gyrus
137	941	[ 0. 0. 0. 0. 0. 0. 0.]	1	88	Possible AD	Inferior Temporal Gyrus
138	914	[ 0. 0. 0. 0. 0. 0. 0.]	1	89	Possible AD	Inferior Temporal Gyrus
139	83	[ 0. 0. 0. 0. 0. 0. 0.]	1	90	Possible AD	Inferior Temporal Gyrus
140	892	[ 0. 0. 0. -1. 0. 0. 0.]	28	90	Possible AD	Inferior Temporal Gyrus
141	616	[ 0. 0. 0. 0. 0. 0. 0.]	1	91	Possible AD	Inferior Temporal Gyrus
142	879	[ 0. 0. 0. 0. 0. 0. 0.]	1	91	Possible AD	Inferior Temporal Gyrus
143	1006	[ 0. 0. 0. 0. 0. 0. 0.]	1	98	Possible AD	Inferior Temporal Gyrus
144	234	[ 1. 0. 0. 0. 1. 0. 0.]	48	99	Possible AD	Inferior Temporal Gyrus
145	988	[ 0. 1. 0. 0. 0. 0. 0.]	25	79	Probable AD	Inferior Temporal Gyrus
146	1027	[ 0. 0. 0. 0. 0. 0. 0.]	1	80	Probable AD	Inferior Temporal Gyrus
147	798	[-1. 0. 1. 0. 0. 0. 0.]	30	81	Probable AD	Inferior Temporal Gyrus
148	184	[ 0. -1. 0. 0. 0. 0. 0.]	52	86	Probable AD	Inferior Temporal Gyrus
149	882	[ 0. -1. 0. 0. 0. 0. 0.]	52	90	Probable AD	Inferior Temporal Gyrus
150	963	[ 0. 0. 0. 0. 0. 0. 0.]	1	90	Probable AD	Inferior Temporal Gyrus
151	111	[ 0. 0. 0. 0. 0. 0. 0.]	1	93	Probable AD	Inferior Temporal Gyrus
152	869	[-1. -1. 0. 0. 0. 0. 0.]	38	93	Probable AD	Inferior Temporal Gyrus
153	956	[ 0. 0. 0. 0. 0. 0. 0.]	1	93	Probable AD	Inferior Temporal Gyrus
154	592	[ 0. 0. 0. 0. 0. 0. 0.]	1	95	Probable AD	Inferior Temporal Gyrus
155	1012	[ 0. 0. 0. 0. 0. 0. 0.]	1	98	Probable AD	Inferior Temporal Gyrus
156	316	[ 0. -1. 0. 0. 0. 0. 0.]	52	64	definite AD	Inferior Temporal Gyrus
157	176	[-1. 0. 0. -1. 0. 0. 0.]	14	72	definite AD	Inferior Temporal Gyrus
158	989	[-1. 0. 0. 0. 0. 0. 0.]	2	73	definite AD	Inferior Temporal Gyrus
159	427	[ 0. 0. -1. 0. 0. 0. 0.]	19	80	definite AD	Inferior Temporal Gyrus
160	451	[ 0. 0. 0. 0. 0. 0. 0.]	1	83	definite AD	Inferior Temporal Gyrus
161	347	[ 0. 0. 0. 0. 0. 0. 0.]	1	84	definite AD	Inferior Temporal Gyrus
162	457	[ 0. 0. 0. 0. 1. 0. 0.]	33	84	definite AD	Inferior Temporal Gyrus
163	870	[ 0. -1. 0. 0. 0. 0. 0.]	52	85	definite AD	Inferior Temporal Gyrus
164	375	[ 0. 0. 0. 0. 0. 0. 0.]	1	87	definite AD	Inferior Temporal Gyrus
165	462	[ 0. 0. 0. 0. 0. 0. 0.]	1	87	definite AD	Inferior Temporal Gyrus
166	488	[ 0. -1. 0. 0. 0. 0. 0.]	52	87	definite AD	Inferior Temporal Gyrus
167	571	[ 0. -1. 0. 0. 0. 0. 0.]	52	89	definite AD	Inferior Temporal Gyrus
168	66	[ 0. 0. 0. 0. 0. 0. 0.]	1	89	definite AD	Inferior Temporal Gyrus
169	215	[ 0. -1. 0. 0. 0. 0. 0.]	52	91	definite AD	Inferior Temporal Gyrus
170	1023	[ 0. 0. 0. 0. 0. 0. 0.]	1	92	definite AD	Inferior Temporal Gyrus
171	273	[-1. 0. 0. 0. 0. 0. 0.]	2	92	definite AD	Inferior Temporal Gyrus
172	13	[ 1. -1. 0. 0. 0. 0. 0.]	27	94	definite AD	Inferior Temporal Gyrus
173	332	[ 1. -1. 0. 0. 0. 0. 0.]	27	94	definite AD	Inferior Temporal Gyrus
174	256	[ 0. 0. 0. 0. 0. 0. 0.]	1	99	definite AD	Inferior Temporal Gyrus
175	1018	[ 1. 0. 0. 0. 0. 0. 0.]	10	60	Normal	Middle Temporal Gyrus
176	990	[ 1. 0. 0. 0. 0. 0. 0.]	10	62	Normal	Middle Temporal Gyrus
177	495	[ 0. -1. 0. 0. 0. 0. 0.]	52	69	Normal	Middle Temporal Gyrus
178	923	[ 0. 0. 0. 0. 0. 0. 0.]	1	69	Normal	Middle Temporal Gyrus
179	2010	[ 1. 0. -1. 0. 0. 0. 0.]	12	70	Normal	Middle Temporal Gyrus
180	523	[ 1. -1. 0. 0. 0. 0. 0.]	27	82	Normal	Middle Temporal Gyrus
181	842	[ 0. -1. 0. 0. 0. 0. 0.]	52	83	Normal	Middle Temporal Gyrus
182	1039	[ 0. 0. 0. 0. 0. 0. 0.]	1	85	Normal	Middle Temporal Gyrus
183	551	[ 0. -1. 0. 0. 0. 0. 0.]	52	85	Normal	Middle Temporal Gyrus
184	82	[ 1. 0. 0. 0. 0. 0. 0.]	10	86	Normal	Middle Temporal Gyrus
185	800	[ 0. -1. 1. 0. 0. 0. 0.]	29	89	Normal	Middle Temporal Gyrus
186	776	[ 0. 0. 0. 0. 0. 0. 0.]	1	95	Normal	Middle Temporal Gyrus
187	230	[ 0. 0. 0. 0. 0. 0. 0.]	1	96	Normal	Middle Temporal Gyrus
188	625	[-1. -1. 0. 0. 0. 0. 0.]	38	102	Normal	Middle Temporal Gyrus
189	836	[ 0. -1. 0. 0. 0. 0. 0.]	52	64	Possible AD	Middle Temporal Gyrus
190	865	[ 0. 0. 0. 0. 0. 0. 0.]	1	79	Possible AD	Middle Temporal Gyrus
191	618	[ 1. 0. -1. 0. 0. 0. 0.]	12	82	Possible AD	Middle Temporal Gyrus
192	940	[ 0. 0. 0. 0. 0. 0. 0.]	1	83	Possible AD	Middle Temporal Gyrus
193	639	[ 0. 0. 0. 0. 0. 0. 0.]	1	86	Possible AD	Middle Temporal Gyrus
194	941	[ 0. 0. 0. 0. 0. 0. 0.]	1	88	Possible AD	Middle Temporal Gyrus
195	914	[ 0. 0. 0. 0. 0. 0. 0.]	1	89	Possible AD	Middle Temporal Gyrus
196	83	[ 1. 0. 0. 0. 0. 0. 0.]	10	90	Possible AD	Middle Temporal Gyrus
197	892	[ 0. 0. 0. 0. 0. 0. 0.]	1	90	Possible AD	Middle Temporal Gyrus
198	480	[ 1. 0. 0. 0. 0. 0. 0.]	10	91	Possible AD	Middle Temporal Gyrus
199	616	[ 0. -1. -1. 0. 0. -1. 0.]	39	91	Possible AD	Middle Temporal Gyrus
200	1006	[ 0. 0. 0. 0. 0. 0. 0.]	1	98	Possible AD	Middle Temporal Gyrus
201	234	[ 1. 0. 0. 0. 0. 0. 0.]	10	99	Possible AD	Middle Temporal Gyrus
202	988	[ 0. 0. 0. 0. 0. 0. 0.]	1	79	Probable AD	Middle Temporal Gyrus
203	750	[ 0. 0. 0. 0. -1. 0. 0.]	7	84	Probable AD	Middle Temporal Gyrus
204	504	[ 0. 0. 0. 0. 0. 0. 0.]	1	85	Probable AD	Middle Temporal Gyrus
205	831	[-1. -1. 0. 0. 0. 0. 0.]	38	88	Probable AD	Middle Temporal Gyrus
206	882	[ 0. 0. 0. 0. 0. 0. 0.]	1	90	Probable AD	Middle Temporal Gyrus
207	963	[ 0. 0. 0. 0. 0. 0. 0.]	1	90	Probable AD	Middle Temporal Gyrus
208	665	[ 0. 0. 0. 0. 0. 0. 0.]	1	92	Probable AD	Middle Temporal Gyrus
209	111	[ 0. 0. 0. 0. 0. 0. 0.]	1	93	Probable AD	Middle Temporal Gyrus
210	956	[ 0. 1. 0. 0. 0. 0. 0.]	25	93	Probable AD	Middle Temporal Gyrus
211	592	[ 0. 0. 0. 0. 0. 0. 0.]	1	95	Probable AD	Middle Temporal Gyrus
212	1012	[ 0. 0. 0. 0. 0. 0. 0.]	1	98	Probable AD	Middle Temporal Gyrus
213	316	[-1. 0. 0. 0. 0. 0. 0.]	2	64	definite AD	Middle Temporal Gyrus
214	989	[-1. 0. 0. 0. 0. 0. 0.]	2	73	definite AD	Middle Temporal Gyrus
215	427	[ 0. -1. 0. 0. 0. 0. 0.]	52	80	definite AD	Middle Temporal Gyrus
216	451	[ 0. 0. 0. 0. 0. 0. 0.]	1	83	definite AD	Middle Temporal Gyrus
217	347	[ 0. 0. 0. 0. 0. 0. 0.]	1	84	definite AD	Middle Temporal Gyrus
218	457	[ 1. -1. 0. 0. 0. 0. 0.]	27	84	definite AD	Middle Temporal Gyrus
219	623	[ 0. -1. 0. 0. 0. 0. 0.]	52	85	definite AD	Middle Temporal Gyrus
220	870	[ 0. 0. 0. 0. 0. 0. 0.]	1	85	definite AD	Middle Temporal Gyrus
221	375	[ 0. -1. 0. 0. 0. 0. 0.]	52	87	definite AD	Middle Temporal Gyrus
222	462	[ 0. -1. 0. 0. 0. 0. 0.]	52	87	definite AD	Middle Temporal Gyrus
223	488	[ 0. -1. 0. 0. 0. 0. 0.]	52	87	definite AD	Middle Temporal Gyrus
224	755	[ 0. 0. 0. 0. 0. 0. 0.]	1	87	definite AD	Middle Temporal Gyrus
225	571	[ 0. 0. 0. 0. 0. 0. 0.]	1	89	definite AD	Middle Temporal Gyrus
226	66	[ 1. 0. 0. 0. 0. 0. 0.]	10	89	definite AD	Middle Temporal Gyrus
227	215	[ 0. 0. 0. 0. 0. 0. 0.]	1	91	definite AD	Middle Temporal Gyrus
228	1023	[ 0. 0. 0. 0. 0. 0. 0.]	1	92	definite AD	Middle Temporal Gyrus
229	273	[ 0. -1. 0. 0. 0. 0. 0.]	52	92	definite AD	Middle Temporal Gyrus
230	332	[ 1. 0. 0. 0. 0. 0. 0.]	10	94	definite AD	Middle Temporal Gyrus
231	786	[-1. -1. 0. 0. 0. 0. 0.]	38	95	definite AD	Middle Temporal Gyrus
232	256	[ 0. 0. 0. 0. 0. 0. 0.]	1	99	definite AD	Middle Temporal Gyrus
233	1018	[ 1. 0. 0. 0. 0. 0. 0.]	10	60	Normal	Superior Temporal Gyrus
234	990	[ 1. 0. 0. 0. 0. 0. 0.]	10	62	Normal	Superior Temporal Gyrus
235	923	[ 0. 0. 0. 0. 0. 0. 0.]	1	69	Normal	Superior Temporal Gyrus
236	2010	[ 0. 0. -1. 0. 0. 0. 0.]	19	70	Normal	Superior Temporal Gyrus
237	523	[ 1. 0. -1. 0. 0. 0. 0.]	12	82	Normal	Superior Temporal Gyrus
238	842	[ 0. 0. 0. 0. 0. 0. 0.]	1	83	Normal	Superior Temporal Gyrus
239	1039	[ 0. 0. 0. 0. 0. 0. 0.]	1	85	Normal	Superior Temporal Gyrus
240	551	[ 1. 0. 0. 0. 0. 0. 0.]	10	85	Normal	Superior Temporal Gyrus
241	82	[ 0. 0. -1. 0. 0. 0. 0.]	19	86	Normal	Superior Temporal Gyrus
242	800	[ 0. 0. 0. 0. 0. 0. 0.]	1	89	Normal	Superior Temporal Gyrus
243	25	[ 0. 0. 0. 0. 0. 0. 0.]	1	90	Normal	Superior Temporal Gyrus
244	776	[ 0. 0. 0. 0. 0. 0. 0.]	1	95	Normal	Superior Temporal Gyrus
245	230	[ 0. 0. 0. 0. 0. 0. 0.]	1	96	Normal	Superior Temporal Gyrus
246	625	[ 0. 0. 0. 0. 0. 0. 0.]	1	102	Normal	Superior Temporal Gyrus
247	836	[ 1. 0. 0. 0. 0. 0. 0.]	10	64	Possible AD	Superior Temporal Gyrus
248	865	[ 0. 0. 0. 0. 0. 0. 0.]	1	79	Possible AD	Superior Temporal Gyrus
249	360	[ 0. 0. 0. 0. 0. 0. 0.]	1	82	Possible AD	Superior Temporal Gyrus
250	386	[ 0. 0. 0. 0. 0. 0. 0.]	1	83	Possible AD	Superior Temporal Gyrus
251	940	[ 0. 0. 1. 0. 0. 0. 0.]	50	83	Possible AD	Superior Temporal Gyrus
252	639	[ 0. 0. 0. 0. 0. 0. 0.]	1	86	Possible AD	Superior Temporal Gyrus
253	941	[ 0. 1. 0. 0. 0. 0. 0.]	25	88	Possible AD	Superior Temporal Gyrus
254	914	[ 0. 0. 0. 0. 0. 0. 0.]	1	89	Possible AD	Superior Temporal Gyrus
255	417	[ 0. 0. 0. 0. 0. 0. 0.]	1	90	Possible AD	Superior Temporal Gyrus
256	589	[ 0. 0. 0. 0. 0. 0. 0.]	1	90	Possible AD	Superior Temporal Gyrus
257	83	[ 1. 0. -1. 0. 0. -1. 0.]	31	90	Possible AD	Superior Temporal Gyrus
258	480	[ 1. 0. 0. 0. 0. 0. 0.]	10	91	Possible AD	Superior Temporal Gyrus
259	616	[ 0. 0. 0. 0. 0. 0. 0.]	1	91	Possible AD	Superior Temporal Gyrus
260	973	[ 0. -1. 0. 0. 0. 0. 0.]	52	96	Possible AD	Superior Temporal Gyrus
261	234	[ 0. 0. 0. 0. 0. 0. 0.]	1	99	Possible AD	Superior Temporal Gyrus
262	988	[ 0. 0. 0. 0. 0. 0. 0.]	1	79	Probable AD	Superior Temporal Gyrus
263	752	[ 0. -1. -1. 0. 0. 0. 0.]	44	84	Probable AD	Superior Temporal Gyrus
264	184	[ 0. 0. 0. 0. 0. 0. 0.]	1	86	Probable AD	Superior Temporal Gyrus
265	882	[ 0. 0. 0. 0. 0. 0. 0.]	1	90	Probable AD	Superior Temporal Gyrus
266	111	[ 0. 0. 1. 0. 0. 0. 0.]	50	93	Probable AD	Superior Temporal Gyrus
267	95	[ 0. 0. 0. 0. 0. 0. 0.]	1	93	Probable AD	Superior Temporal Gyrus
268	592	[ 1. 0. 0. 0. 0. 0. 0.]	10	95	Probable AD	Superior Temporal Gyrus
269	1012	[ 0. 0. 0. 0. 0. 0. 0.]	1	98	Probable AD	Superior Temporal Gyrus
270	233	[ 0. 0. 0. 0. 0. 0. 0.]	1	100	Probable AD	Superior Temporal Gyrus
271	316	[-1. -1. 0. 0. 0. 0. 0.]	38	64	definite AD	Superior Temporal Gyrus
272	176	[-1. 0. 0. 0. 0. 0. 0.]	2	72	definite AD	Superior Temporal Gyrus
273	451	[ 0. 0. 0. 0. 0. 0. 0.]	1	83	definite AD	Superior Temporal Gyrus
274	347	[ 0. 0. 0. 0. 0. 0. 0.]	1	84	definite AD	Superior Temporal Gyrus
275	364	[ 0. 0. 0. 0. 0. 0. 0.]	1	84	definite AD	Superior Temporal Gyrus
276	870	[ 0. 0. 0. 0. 0. 0. 0.]	1	85	definite AD	Superior Temporal Gyrus
277	375	[ 0. 0. 0. 0. 0. 0. 0.]	1	87	definite AD	Superior Temporal Gyrus
278	462	[ 0. 0. 0. 0. 0. 0. 0.]	1	87	definite AD	Superior Temporal Gyrus
279	755	[ 0. 0. 0. 0. 0. 0. 0.]	1	87	definite AD	Superior Temporal Gyrus
280	571	[ 1. 0. 0. 0. 0. 0. 0.]	10	89	definite AD	Superior Temporal Gyrus
281	66	[ 0. 0. 0. 0. 0. 0. 0.]	1	89	definite AD	Superior Temporal Gyrus
282	468	[-1. -1. 1. 0. 0. 0. 0.]	15	90	definite AD	Superior Temporal Gyrus
283	215	[ 0. 0. 0. 0. 0. 0. 0.]	1	91	definite AD	Superior Temporal Gyrus
284	273	[ 0. -1. 0. 0. 0. 0. 0.]	52	92	definite AD	Superior Temporal Gyrus
285	782	[ 0. -1. 0. 0. 0. 0. 0.]	52	92	definite AD	Superior Temporal Gyrus
286	13	[ 1. 0. 0. 0. 0. 0. 0.]	10	94	definite AD	Superior Temporal Gyrus
287	332	[ 0. 0. 1. 0. 0. 0. 0.]	50	94	definite AD	Superior Temporal Gyrus
288	505	[ 1. 0. 0. 0. 0. 0. 0.]	10	94	definite AD	Superior Temporal Gyrus
289	630	[ 0. 0. 0. 0. 0. 0. 0.]	1	94	definite AD	Superior Temporal Gyrus
290	640	[-1. 0. 0. 0. 0. 0. 0.]	2	94	definite AD	Superior Temporal Gyrus
291	256	[ 0. 1. 0. 0. 0. 0. 0.]	25	99	definite AD	Superior Temporal Gyrus
292	607	[-1. 0. 0. 0. 0. 0. 0.]	2	103	definite AD	Superior Temporal Gyrus
293	843	[ 0. 0. 0. 0. 0. 0. 0.]	1	66	Normal	Posterior Cingulate Cortex
294	495	[ 0. -1. 0. 0. 0. 0. 0.]	52	69	Normal	Posterior Cingulate Cortex
295	2010	[ 0. 0. 0. 0. 0. 0. 0.]	1	70	Normal	Posterior Cingulate Cortex
296	972	[ 0. -1. 0. 0. 0. 0. 0.]	52	74	Normal	Posterior Cingulate Cortex
297	523	[ 0. -1. 0. 0. 0. 0. 0.]	52	82	Normal	Posterior Cingulate Cortex
298	842	[ 0. 0. 0. 0. 0. 0. 0.]	1	83	Normal	Posterior Cingulate Cortex
299	551	[ 1. 0. 0. 0. 0. 0. 0.]	10	85	Normal	Posterior Cingulate Cortex
300	82	[ 0. 0. 0. 0. 0. 0. 0.]	1	86	Normal	Posterior Cingulate Cortex
301	800	[ 0. 0. 0. 0. 0. 0. 0.]	1	89	Normal	Posterior Cingulate Cortex
302	776	[ 0. -1. 0. 0. 0. 0. 0.]	52	95	Normal	Posterior Cingulate Cortex
303	230	[ 0. 0. 0. 0. 0. 0. 0.]	1	96	Normal	Posterior Cingulate Cortex
304	625	[ 0. -1. 0. 0. 0. 0. 0.]	52	102	Normal	Posterior Cingulate Cortex
305	836	[ 0. -1. 0. 0. 0. 0. 0.]	52	64	Possible AD	Posterior Cingulate Cortex
306	865	[ 0. 0. 0. 0. 0. 0. 0.]	1	79	Possible AD	Posterior Cingulate Cortex
307	360	[ 0. 0. 0. 0. 0. 0. 0.]	1	82	Possible AD	Posterior Cingulate Cortex
308	618	[ 1. 0. 0. 0. 0. 0. 0.]	10	82	Possible AD	Posterior Cingulate Cortex
309	804	[ 0. 0. 0. -1. 0. 0. 0.]	28	82	Possible AD	Posterior Cingulate Cortex
310	639	[ 0. -1. 0. 0. 0. 0. 0.]	52	86	Possible AD	Posterior Cingulate Cortex
311	941	[ 0. 0. 0. 0. 0. 0. 0.]	1	88	Possible AD	Posterior Cingulate Cortex
312	914	[ 0. 0. 0. 0. 0. 0. 0.]	1	89	Possible AD	Posterior Cingulate Cortex
313	83	[ 0. 0. 0. 0. 0. 0. 0.]	1	90	Possible AD	Posterior Cingulate Cortex
314	892	[ 0. 1. 0. 0. 0. 0. 0.]	25	90	Possible AD	Posterior Cingulate Cortex
315	480	[ 1. 0. 0. 0. 0. 0. 0.]	10	91	Possible AD	Posterior Cingulate Cortex
316	616	[ 0. -1. -1. 0. 0. 0. 0.]	44	91	Possible AD	Posterior Cingulate Cortex
317	973	[ 0. 0. 0. 0. 0. 0. 0.]	1	96	Possible AD	Posterior Cingulate Cortex
318	1006	[ 0. 0. 0. 0. 0. 0. 0.]	1	98	Possible AD	Posterior Cingulate Cortex
319	234	[ 0. 0. 0. 0. 0. 0. 0.]	1	99	Possible AD	Posterior Cingulate Cortex
320	988	[ 0. 0. 0. 0. 0. 0. 0.]	1	79	Probable AD	Posterior Cingulate Cortex
321	1027	[-1. 0. 0. 0. 0. 0. 0.]	2	80	Probable AD	Posterior Cingulate Cortex
322	184	[ 0. -1. 0. 0. 0. 0. 0.]	52	86	Probable AD	Posterior Cingulate Cortex
323	111	[ 0. 0. 0. 0. 0. 0. 0.]	1	93	Probable AD	Posterior Cingulate Cortex
324	367	[ 0. -1. 0. 0. 0. 0. 0.]	52	93	Probable AD	Posterior Cingulate Cortex
325	956	[ 0. 0. 0. 0. -1. 0. 0.]	7	93	Probable AD	Posterior Cingulate Cortex
326	592	[ 0. -1. 0. 0. 0. 0. 0.]	52	95	Probable AD	Posterior Cingulate Cortex
327	233	[-1. 0. 0. 0. 0. 0. 0.]	2	100	Probable AD	Posterior Cingulate Cortex
328	176	[-1. 0. 0. 0. 0. 0. 0.]	2	72	definite AD	Posterior Cingulate Cortex
329	989	[ 0. 0. 0. 0. 0. 0. 0.]	1	73	definite AD	Posterior Cingulate Cortex
330	427	[ 0. -1. 0. 0. 0. 0. 0.]	52	80	definite AD	Posterior Cingulate Cortex
331	451	[ 0. 0. 0. 0. 0. 0. 0.]	1	83	definite AD	Posterior Cingulate Cortex
332	347	[ 0. 0. 0. 0. 0. 0. 0.]	1	84	definite AD	Posterior Cingulate Cortex
333	364	[-1. 0. 0. 0. 0. 0. 0.]	2	84	definite AD	Posterior Cingulate Cortex
334	457	[ 0. -1. 0. 0. 0. 0. 0.]	52	84	definite AD	Posterior Cingulate Cortex
335	623	[ 0. -1. 0. 0. 0. 0. 0.]	52	85	definite AD	Posterior Cingulate Cortex
336	870	[-1. 0. 0. 0. 0. 0. 0.]	2	85	definite AD	Posterior Cingulate Cortex
337	375	[ 0. -1. 0. 0. 0. 0. 0.]	52	87	definite AD	Posterior Cingulate Cortex
338	462	[ 0. 0. -1. 0. 0. 0. 0.]	19	87	definite AD	Posterior Cingulate Cortex
339	488	[ 0. 0. 0. 0. 0. 0. 0.]	1	87	definite AD	Posterior Cingulate Cortex
340	755	[ 1. 0. 0. 0. 0. 0. 0.]	10	87	definite AD	Posterior Cingulate Cortex
341	626	[ 0. -1. 0. 0. 0. 0. 0.]	52	88	definite AD	Posterior Cingulate Cortex
342	571	[ 0. 0. 0. 0. 0. 0. 0.]	1	89	definite AD	Posterior Cingulate Cortex
343	66	[ 0. -1. 0. 0. 0. 0. 0.]	52	89	definite AD	Posterior Cingulate Cortex
344	975	[-1. 0. 0. 0. 0. 0. 0.]	2	90	definite AD	Posterior Cingulate Cortex
345	215	[ 0. 0. 0. 0. 0. 0. 0.]	1	91	definite AD	Posterior Cingulate Cortex
346	1023	[ 0. 0. 0. 0. 0. 0. 0.]	1	92	definite AD	Posterior Cingulate Cortex
347	332	[ 1. 0. -1. 0. 0. 0. 0.]	12	94	definite AD	Posterior Cingulate Cortex
348	786	[ 0. -1. -1. 0. 0. 0. 0.]	44	95	definite AD	Posterior Cingulate Cortex
349	256	[ 0. 0. 0. 0. 0. 0. 0.]	1	99	definite AD	Posterior Cingulate Cortex
350	370	[ 0. 0. 1. 0. 0. 0. 0.]	50	100	definite AD	Posterior Cingulate Cortex
351	1018	[ 0. 0. 0. 0. 0. 0. 0.]	1	60	Normal	Anterior Cingulate
352	990	[ 1. 0. 0. 0. 0. 0. 0.]	10	62	Normal	Anterior Cingulate
353	495	[ 0. -1. 0. 0. 0. 0. 0.]	52	69	Normal	Anterior Cingulate
354	2010	[ 0. 0. -1. 0. 0. 0. 0.]	19	70	Normal	Anterior Cingulate
355	972	[ 0. 0. 0. 0. 0. 0. 0.]	1	74	Normal	Anterior Cingulate
356	872	[-1. 0. 0. 0. 0. 0. 0.]	2	75	Normal	Anterior Cingulate
357	523	[ 1. 0. 0. 0. 0. 0. 0.]	10	82	Normal	Anterior Cingulate
358	842	[ 0. 0. 0. 0. 0. 0. 0.]	1	83	Normal	Anterior Cingulate
359	1039	[ 0. 0. 0. 0. 0. 0. 0.]	1	85	Normal	Anterior Cingulate
360	551	[ 0. -1. 0. 0. 0. 0. 0.]	52	85	Normal	Anterior Cingulate
361	82	[ 0. -1. 0. 0. 0. 0. 0.]	52	86	Normal	Anterior Cingulate
362	800	[ 0. 0. -1. 0. 0. 0. 0.]	19	89	Normal	Anterior Cingulate
363	532	[-1. 0. 0. 0. 0. 0. 0.]	2	92	Normal	Anterior Cingulate
364	776	[ 0. 0. -1. 0. 0. 0. 0.]	19	95	Normal	Anterior Cingulate
365	230	[ 0. 0. 0. 0. 0. 0. 0.]	1	96	Normal	Anterior Cingulate
366	625	[-1. 0. 0. 0. 0. 0. 0.]	2	102	Normal	Anterior Cingulate
367	836	[ 1. -1. 0. 0. 0. 0. 0.]	27	64	Possible AD	Anterior Cingulate
368	865	[ 0. 0. 0. 0. 0. 0. 0.]	1	79	Possible AD	Anterior Cingulate
369	618	[ 0. 1. 0. 0. 0. 0. 0.]	25	82	Possible AD	Anterior Cingulate
370	940	[ 0. 0. 0. 0. 0. 0. 0.]	1	83	Possible AD	Anterior Cingulate
371	639	[ 0. 0. 0. 0. 0. 0. 0.]	1	86	Possible AD	Anterior Cingulate
372	941	[ 0. 0. 0. 0. 0. 0. 0.]	1	88	Possible AD	Anterior Cingulate
373	914	[ 0. 0. 0. 0. 0. 0. 0.]	1	89	Possible AD	Anterior Cingulate
374	83	[ 1. 0. 0. 0. 0. 0. 0.]	10	90	Possible AD	Anterior Cingulate
375	480	[ 1. 0. 0. 0. 0. 0. 0.]	10	91	Possible AD	Anterior Cingulate
376	879	[ 0. 0. 0. 0. 0. 0. 0.]	1	91	Possible AD	Anterior Cingulate
377	234	[ 0. 0. -1. 0. 0. 0. 0.]	19	99	Possible AD	Anterior Cingulate
378	988	[ 1. 0. 0. 0. 0. 0. 0.]	10	79	Probable AD	Anterior Cingulate
379	1027	[ 0. 1. 0. 0. 0. 0. 0.]	25	80	Probable AD	Anterior Cingulate
380	340	[ 0. 0. 0. 0. 0. 0. 0.]	1	83	Probable AD	Anterior Cingulate
381	902	[-1. 0. 0. -1. 0. 0. 0.]	14	85	Probable AD	Anterior Cingulate
382	882	[ 1. 0. 0. 0. 0. 0. 0.]	10	90	Probable AD	Anterior Cingulate
383	665	[ 0. 0. 0. -1. 0. 0. 0.]	28	92	Probable AD	Anterior Cingulate
384	111	[ 0. 0. 0. 0. 0. 0. 0.]	1	93	Probable AD	Anterior Cingulate
385	367	[ 0. 0. 0. 0. 0. 0. 0.]	1	93	Probable AD	Anterior Cingulate
386	869	[-1. -1. 0. 0. 0. 0. 0.]	38	93	Probable AD	Anterior Cingulate
387	709	[ 0. 1. 0. 0. 0. 0. 0.]	25	94	Probable AD	Anterior Cingulate
388	592	[ 1. 0. 0. 0. 0. 0. 0.]	10	95	Probable AD	Anterior Cingulate
389	233	[ 0. 0. 0. 0. 0. 0. 0.]	1	100	Probable AD	Anterior Cingulate
390	316	[ 0. 0. 0. 0. 0. 0. 0.]	1	64	definite AD	Anterior Cingulate
391	427	[ 0. -1. 0. 0. 0. 0. 0.]	52	80	definite AD	Anterior Cingulate
392	451	[ 0. 1. 0. 0. 0. 0. 0.]	25	83	definite AD	Anterior Cingulate
393	347	[ 0. 0. 0. 0. 0. 0. 0.]	1	84	definite AD	Anterior Cingulate
394	364	[ 0. 0. 0. 0. 0. 0. 0.]	1	84	definite AD	Anterior Cingulate
395	457	[ 1. 0. 0. 0. 0. 0. 0.]	10	84	definite AD	Anterior Cingulate
396	375	[ 1. 0. 0. 0. 0. 0. 0.]	10	87	definite AD	Anterior Cingulate
397	462	[ 0. 0. 0. 0. 0. 0. 0.]	1	87	definite AD	Anterior Cingulate
398	488	[ 0. 0. 0. 0. 0. 0. 0.]	1	87	definite AD	Anterior Cingulate
399	755	[ 1. 0. 0. 0. 0. 0. 0.]	10	87	definite AD	Anterior Cingulate
400	571	[ 1. 0. 0. 0. 0. 0. 0.]	10	89	definite AD	Anterior Cingulate
401	66	[ 1. 0. 0. 0. 0. 0. 0.]	10	89	definite AD	Anterior Cingulate
402	468	[ 0. -1. 0. 0. 0. 0. 0.]	52	90	definite AD	Anterior Cingulate
403	215	[ 0. 0. 0. 0. 0. 0. 0.]	1	91	definite AD	Anterior Cingulate
404	1023	[ 0. 0. 0. 0. 0. 0. 0.]	1	92	definite AD	Anterior Cingulate
405	273	[ 0. 0. 0. 0. 0. 0. 0.]	1	92	definite AD	Anterior Cingulate
406	13	[ 1. -1. -1. 0. 0. 0. 0.]	37	94	definite AD	Anterior Cingulate
407	332	[ 1. 0. 0. 0. 0. 0. 0.]	10	94	definite AD	Anterior Cingulate
408	786	[ 0. 0. 0. 0. 0. 0. 0.]	1	95	definite AD	Anterior Cingulate
409	256	[ 0. 0. 0. 0. 0. 0. 0.]	1	99	definite AD	Anterior Cingulate
410	990	[ 0. 0. 0. 0. 0. 0. 0.]	1	62	Normal	Parahippocampal Gyrus
411	843	[ 0. 0. 0. 0. 0. 0. 0.]	1	66	Normal	Parahippocampal Gyrus
412	495	[ 0. 0. 0. 0. 0. 0. 0.]	1	69	Normal	Parahippocampal Gyrus
413	923	[ 0. 0. 0. 0. 0. 0. 0.]	1	69	Normal	Parahippocampal Gyrus
414	2010	[ 0. 0. 0. 0. 0. 0. 0.]	1	70	Normal	Parahippocampal Gyrus
415	872	[-1. -1. 1. 0. 0. 0. 0.]	15	75	Normal	Parahippocampal Gyrus
416	523	[ 1. 0. 0. 0. 0. 0. 0.]	10	82	Normal	Parahippocampal Gyrus
417	842	[-1. 0. 1. 0. 0. 0. 0.]	30	83	Normal	Parahippocampal Gyrus
418	1039	[ 0. 0. 0. 0. 0. 0. 0.]	1	85	Normal	Parahippocampal Gyrus
419	551	[ 0. 0. 0. 0. 0. 0. 0.]	1	85	Normal	Parahippocampal Gyrus
420	305	[ 0. 0. 0. 0. 0. 0. 0.]	1	88	Normal	Parahippocampal Gyrus
421	800	[ 0. 0. 0. 0. 0. 0. 0.]	1	89	Normal	Parahippocampal Gyrus
422	25	[ 0. 0. 0. 0. 0. 0. 0.]	1	90	Normal	Parahippocampal Gyrus
423	776	[ 0. 0. 0. 0. 0. 0. 0.]	1	95	Normal	Parahippocampal Gyrus
424	230	[ 0. 0. 0. 0. 0. 0. 0.]	1	96	Normal	Parahippocampal Gyrus
425	836	[ 1. 0. 0. 0. 0. 0. 0.]	10	64	Possible AD	Parahippocampal Gyrus
426	865	[ 0. 0. 0. 0. 0. 0. 0.]	1	79	Possible AD	Parahippocampal Gyrus
427	360	[-1. 0. 0. 0. 0. -1. 0.]	36	82	Possible AD	Parahippocampal Gyrus
428	386	[ 0. 0. 0. 0. 0. 0. 0.]	1	83	Possible AD	Parahippocampal Gyrus
429	639	[ 0. 0. 0. 0. 0. 0. 0.]	1	86	Possible AD	Parahippocampal Gyrus
430	941	[ 0. 0. 1. 0. 0. 0. 0.]	50	88	Possible AD	Parahippocampal Gyrus
431	914	[ 0. 0. 0. 0. 0. 0. 0.]	1	89	Possible AD	Parahippocampal Gyrus
432	417	[ 0. 0. 0. 0. 0. 0. 0.]	1	90	Possible AD	Parahippocampal Gyrus
433	83	[ 1. 0. 0. 0. 0. 0. 0.]	10	90	Possible AD	Parahippocampal Gyrus
434	480	[ 1. 1. 0. 0. 0. 0. 0.]	46	91	Possible AD	Parahippocampal Gyrus
435	616	[-1. 0. 0. 0. 0. 0. 0.]	2	91	Possible AD	Parahippocampal Gyrus
436	973	[ 0. 0. 0. 0. 0. 0. 0.]	1	96	Possible AD	Parahippocampal Gyrus
437	234	[ 0. 0. 0. 0. 0. 0. 0.]	1	99	Possible AD	Parahippocampal Gyrus
438	988	[ 0. 0. 0. 0. 0. 0. 0.]	1	79	Probable AD	Parahippocampal Gyrus
439	340	[ 0. 0. 0. 0. 0. 0. 0.]	1	83	Probable AD	Parahippocampal Gyrus
440	184	[ 0. -1. 1. 0. -1. 0. 0.]	16	86	Probable AD	Parahippocampal Gyrus
441	882	[ 0. 0. -1. 0. 0. 0. 0.]	19	90	Probable AD	Parahippocampal Gyrus
442	963	[ 0. 0. 0. 0. 0. 0. 0.]	1	90	Probable AD	Parahippocampal Gyrus
443	665	[-1. 1. 0. 0. 0. -1. 0.]	6	92	Probable AD	Parahippocampal Gyrus
444	709	[ 0. 1. 0. 0. 0. 0. 0.]	25	94	Probable AD	Parahippocampal Gyrus
445	592	[ 0. 0. 0. 0. 0. 0. 0.]	1	95	Probable AD	Parahippocampal Gyrus
446	233	[ 0. 0. 0. 0. 0. 0. 0.]	1	100	Probable AD	Parahippocampal Gyrus
447	427	[ 0. 0. 0. 0. 0. 0. 0.]	1	80	definite AD	Parahippocampal Gyrus
448	451	[ 0. 0. 0. 0. 0. 0. 0.]	1	83	definite AD	Parahippocampal Gyrus
449	347	[ 0. 0. 0. 0. 1. 0. 0.]	33	84	definite AD	Parahippocampal Gyrus
450	364	[-1. 0. 0. 0. 0. 0. 0.]	2	84	definite AD	Parahippocampal Gyrus
451	457	[ 1. 0. 0. 0. 0. 0. 0.]	10	84	definite AD	Parahippocampal Gyrus
452	870	[ 0. 0. 0. 0. 0. 0. 0.]	1	85	definite AD	Parahippocampal Gyrus
453	375	[ 0. 0. 0. 0. 0. 0. 0.]	1	87	definite AD	Parahippocampal Gyrus
454	462	[ 0. 0. 0. 0. 1. 0. 0.]	33	87	definite AD	Parahippocampal Gyrus
455	488	[-1. 0. 0. 0. 0. 0. 0.]	2	87	definite AD	Parahippocampal Gyrus
456	611	[ 0. -1. 0. 0. 0. 0. 0.]	52	87	definite AD	Parahippocampal Gyrus
457	755	[ 0. 0. 0. 0. 0. 0. 0.]	1	87	definite AD	Parahippocampal Gyrus
458	571	[ 0. 0. 0. 0. 0. 0. 0.]	1	89	definite AD	Parahippocampal Gyrus
459	66	[ 0. 0. 0. 0. 0. 0. 0.]	1	89	definite AD	Parahippocampal Gyrus
460	468	[-1. 0. 0. 0. 0. 0. 0.]	2	90	definite AD	Parahippocampal Gyrus
461	215	[ 0. 0. 0. 0. 0. 0. 0.]	1	91	definite AD	Parahippocampal Gyrus
462	13	[ 1. 0. 0. 0. 0. 0. 0.]	10	94	definite AD	Parahippocampal Gyrus
463	332	[ 0. 0. 0. 0. 0. 0. 0.]	1	94	definite AD	Parahippocampal Gyrus
464	505	[ 1. 0. 0. 0. 0. 0. 0.]	10	94	definite AD	Parahippocampal Gyrus
465	630	[ 0. 0. 0. 0. 0. 0. 0.]	1	94	definite AD	Parahippocampal Gyrus
466	786	[-1. -1. 0. 0. 0. 0. 0.]	38	95	definite AD	Parahippocampal Gyrus
467	399	[-1. 0. 0. 0. 0. 0. 0.]	2	96	definite AD	Parahippocampal Gyrus
468	256	[ 0. 1. 0. 0. 0. 0. 0.]	25	99	definite AD	Parahippocampal Gyrus
469	607	[-1. -1. 1. 0. 0. 0. 0.]	15	103	definite AD	Parahippocampal Gyrus
470	990	[ 0. 0. 1. 0. 0. 0. 0.]	50	62	Normal	Temporal Pole
471	843	[-1. 0. 1. 0. 0. 0. 0.]	30	66	Normal	Temporal Pole
472	495	[ 0. 0. 0. 0. 0. 0. 0.]	1	69	Normal	Temporal Pole
473	923	[ 0. 0. 0. 0. 0. 0. 0.]	1	69	Normal	Temporal Pole
474	2010	[ 0. 0. 0. 0. 0. 0. 0.]	1	70	Normal	Temporal Pole
475	523	[ 1. 1. 0. 0. 0. 0. 0.]	46	82	Normal	Temporal Pole
476	842	[ 0. 0. 1. 0. 0. 0. 0.]	50	83	Normal	Temporal Pole
477	1039	[ 0. 1. 0. 0. 0. 0. 0.]	25	85	Normal	Temporal Pole
478	551	[ 0. 0. 1. 1. 0. 0. 0.]	20	85	Normal	Temporal Pole
479	82	[ 0. 0. 1. 0. 0. 0. 0.]	50	86	Normal	Temporal Pole
480	800	[ 0. 0. 0. 0. 0. 0. 0.]	1	89	Normal	Temporal Pole
481	532	[-1. 0. 0. 0. 0. 0. 0.]	2	92	Normal	Temporal Pole
482	776	[ 0. 0. 1. 0. 0. 0. 0.]	50	95	Normal	Temporal Pole
483	230	[ 0. 1. 0. 0. 0. 0. 0.]	25	96	Normal	Temporal Pole
484	836	[ 1. 0. 1. 1. 0. 0. 0.]	35	64	Possible AD	Temporal Pole
485	865	[ 0. 0. 0. 0. 0. 0. 0.]	1	79	Possible AD	Temporal Pole
486	360	[-1. 0. 1. 0. 0. 0. 0.]	30	82	Possible AD	Temporal Pole
487	618	[ 0. 0. 0. 0. 0. 0. 0.]	1	82	Possible AD	Temporal Pole
488	940	[ 0. 0. 1. 0. 0. 0. 0.]	50	83	Possible AD	Temporal Pole
489	639	[ 0. 0. 1. 0. 0. 0. 0.]	50	86	Possible AD	Temporal Pole
490	941	[ 0. 0. 1. 1. 0. 0. 0.]	20	88	Possible AD	Temporal Pole
491	914	[ 0. 0. 1. 0. 0. 0. 0.]	50	89	Possible AD	Temporal Pole
492	83	[ 0. 0. 0. 0. 0. 0. 0.]	1	90	Possible AD	Temporal Pole
493	480	[ 0. 0. 1. 0. 0. 0. 0.]	50	91	Possible AD	Temporal Pole
494	616	[ 0. 0. 0. 0. 0. -1. 0.]	51	91	Possible AD	Temporal Pole
495	879	[ 0. 1. 0. 0. 0. 0. 0.]	25	91	Possible AD	Temporal Pole
496	973	[ 0. 0. 0. 0. 0. 0. 0.]	1	96	Possible AD	Temporal Pole
497	1006	[ 0. 1. 0. 0. 0. 0. 0.]	25	98	Possible AD	Temporal Pole
498	234	[ 0. 1. 1. 0. 0. 0. 0.]	22	99	Possible AD	Temporal Pole
499	988	[ 0. 0. 0. 0. 0. 0. 0.]	1	79	Probable AD	Temporal Pole
500	1027	[ 0. 0. 0. 0. 0. 0. 0.]	1	80	Probable AD	Temporal Pole
501	340	[ 0. 0. 1. 0. 0. 0. 0.]	50	83	Probable AD	Temporal Pole
502	184	[ 0. 0. 1. 0. 0. 0. 0.]	50	86	Probable AD	Temporal Pole
503	882	[ 0. 0. 0. 0. 0. 0. 0.]	1	90	Probable AD	Temporal Pole
504	665	[-1. 0. 0. 0. 0. -1. 0.]	36	92	Probable AD	Temporal Pole
505	111	[ 0. 1. 0. 0. 0. 0. 0.]	25	93	Probable AD	Temporal Pole
506	869	[-1. 0. 0. 0. 0. 0. 0.]	2	93	Probable AD	Temporal Pole
507	592	[ 1. 1. 0. 0. 0. 0. 0.]	46	95	Probable AD	Temporal Pole
508	1012	[ 0. 1. 0. 0. 0. 0. 0.]	25	98	Probable AD	Temporal Pole
509	233	[ 0. 0. 0. 0. 0. 0. 0.]	1	100	Probable AD	Temporal Pole
510	316	[ 0. 1. 0. 0. 0. 0. 0.]	25	64	definite AD	Temporal Pole
511	989	[ 0. 0. 1. 0. 0. 0. 0.]	50	73	definite AD	Temporal Pole
512	451	[ 0. 1. 0. 0. 0. 0. 0.]	25	83	definite AD	Temporal Pole
513	347	[ 0. 0. 1. 0. 0. 0. 0.]	50	84	definite AD	Temporal Pole
514	457	[ 1. 1. 0. 0. 0. 0. 0.]	46	84	definite AD	Temporal Pole
515	870	[ 0. 0. 0. 0. 0. 0. 0.]	1	85	definite AD	Temporal Pole
516	375	[ 0. 0. 1. 0. 0. 0. 0.]	50	87	definite AD	Temporal Pole
517	462	[ 0. 0. 0. 0. 0. 0. 0.]	1	87	definite AD	Temporal Pole
518	488	[ 0. 0. 0. 0. 0. 0. 0.]	1	87	definite AD	Temporal Pole
519	755	[ 0. 0. 0. 0. 0. 0. 0.]	1	87	definite AD	Temporal Pole
520	571	[ 0. 0. 0. 0. 0. 0. 0.]	1	89	definite AD	Temporal Pole
521	66	[ 0. 0. 0. 0. 0. 0. 0.]	1	89	definite AD	Temporal Pole
522	463	[-1. 0. 1. 0. 0. 0. 0.]	30	90	definite AD	Temporal Pole
523	975	[-1. 0. 0. 0. 0. 0. 0.]	2	90	definite AD	Temporal Pole
524	215	[ 0. 0. 0. 0. 0. 0. 0.]	1	91	definite AD	Temporal Pole
525	273	[ 0. 0. 0. 0. 0. 0. 0.]	1	92	definite AD	Temporal Pole
526	786	[-1. 0. 0. 0. 0. 0. 0.]	2	95	definite AD	Temporal Pole
527	399	[ 0. 0. 0. 0. 0. 0. 0.]	1	96	definite AD	Temporal Pole
528	495	[ 0. 0. 0. 0. 0. 0. 0.]	1	69	Normal	Precentral Gyrus
529	1039	[ 0. 0. 0. 0. 0. 0. 0.]	1	85	Normal	Precentral Gyrus
530	82	[ 0. 0. 0. 0. 0. 0. 0.]	1	86	Normal	Precentral Gyrus
531	800	[ 0. 0. 0. 0. 0. 0. 0.]	1	89	Normal	Precentral Gyrus
532	230	[ 0. 0. 0. 0. 0. 0. 0.]	1	96	Normal	Precentral Gyrus
533	836	[ 0. 0. 0. 0. 0. 0. 0.]	1	64	Possible AD	Precentral Gyrus
534	865	[ 0. 0. 0. 0. 0. 0. 0.]	1	79	Possible AD	Precentral Gyrus
535	360	[ 0. 1. 0. 0. 0. 0. 0.]	25	82	Possible AD	Precentral Gyrus
536	618	[ 0. 1. 0. 0. -1. 0. 0.]	49	82	Possible AD	Precentral Gyrus
537	804	[ 0. 1. 0. 0. 0. 0. 0.]	25	82	Possible AD	Precentral Gyrus
538	940	[ 1. 0. 0. 0. 0. 0. 0.]	10	83	Possible AD	Precentral Gyrus
539	941	[-1. 0. 0. 0. 0. 0. 0.]	2	88	Possible AD	Precentral Gyrus
540	914	[ 0. 0. 0. 0. 0. 0. 0.]	1	89	Possible AD	Precentral Gyrus
541	83	[ 0. 0. 0. 0. 0. 0. 0.]	1	90	Possible AD	Precentral Gyrus
542	480	[ 0. 0. 1. 0. 0. 0. 0.]	50	91	Possible AD	Precentral Gyrus
543	616	[ 0. 0. 0. 0. 0. 0. 0.]	1	91	Possible AD	Precentral Gyrus
544	1006	[ 0. 1. 0. 0. 0. 0. 0.]	25	98	Possible AD	Precentral Gyrus
545	234	[ 1. 1. 0. 0. 0. 0. 0.]	46	99	Possible AD	Precentral Gyrus
546	988	[ 0. 0. 0. 0. 0. 0. 0.]	1	79	Probable AD	Precentral Gyrus
547	750	[ 0. 0. 0. 0. -1. 0. 0.]	7	84	Probable AD	Precentral Gyrus
548	504	[ 0. 1. 0. 0. 0. 0. 0.]	25	85	Probable AD	Precentral Gyrus
549	184	[ 0. 0. 0. 0. 0. 0. 0.]	1	86	Probable AD	Precentral Gyrus
550	882	[ 0. 0. 1. 0. 0. 0. 0.]	50	90	Probable AD	Precentral Gyrus
551	665	[ 0. 0. 0. 0. 0. 0. 0.]	1	92	Probable AD	Precentral Gyrus
552	111	[ 0. 0. 0. 0. 0. 0. 0.]	1	93	Probable AD	Precentral Gyrus
553	869	[-1. 0. 0. 0. 0. 0. 0.]	2	93	Probable AD	Precentral Gyrus
554	709	[ 0. 1. 0. 0. 0. 0. 0.]	25	94	Probable AD	Precentral Gyrus
555	592	[ 0. 0. 0. 0. 0. 0. 0.]	1	95	Probable AD	Precentral Gyrus
556	1012	[ 0. 0. 0. 0. 0. 0. 0.]	1	98	Probable AD	Precentral Gyrus
557	233	[ 0. 0. 1. 0. 0. 0. 0.]	50	100	Probable AD	Precentral Gyrus
558	176	[-1. 0. 0. 0. 0. 0. 0.]	2	72	definite AD	Precentral Gyrus
559	427	[ 0. 0. 0. 0. 0. 0. 0.]	1	80	definite AD	Precentral Gyrus
560	451	[ 0. 0. 0. 0. 0. 0. 0.]	1	83	definite AD	Precentral Gyrus
561	347	[ 0. 1. 0. 0. 0. 0. 0.]	25	84	definite AD	Precentral Gyrus
562	870	[ 0. 0. 0. 0. 0. 0. 0.]	1	85	definite AD	Precentral Gyrus
563	375	[ 0. 0. 1. 0. 0. 0. 0.]	50	87	definite AD	Precentral Gyrus
564	462	[ 0. 0. 0. 0. 0. 0. 0.]	1	87	definite AD	Precentral Gyrus
565	488	[ 0. 0. 1. 0. 0. 0. 0.]	50	87	definite AD	Precentral Gyrus
566	755	[-1. 0. 1. 0. 0. 0. 0.]	30	87	definite AD	Precentral Gyrus
567	571	[ 0. 0. 1. 0. 0. 0. 0.]	50	89	definite AD	Precentral Gyrus
568	66	[ 0. 1. 0. 0. 0. 0. 0.]	25	89	definite AD	Precentral Gyrus
569	463	[ 0. 0. 1. 0. 0. 0. 0.]	50	90	definite AD	Precentral Gyrus
570	215	[ 0. 0. 0. 0. 0. 0. 0.]	1	91	definite AD	Precentral Gyrus
571	1023	[ 0. 0. 0. 0. 0. 0. 0.]	1	92	definite AD	Precentral Gyrus
572	273	[ 0. 0. 0. 0. 0. 0. 0.]	1	92	definite AD	Precentral Gyrus
573	13	[ 0. 1. 0. 0. 0. 0. 0.]	25	94	definite AD	Precentral Gyrus
574	332	[ 0. 0. 0. 0. 0. 0. 0.]	1	94	definite AD	Precentral Gyrus
575	786	[ 0. 0. 0. 0. 0. 0. 0.]	1	95	definite AD	Precentral Gyrus
576	399	[ 0. 1. 0. 0. 0. 0. 0.]	25	96	definite AD	Precentral Gyrus
577	495	[ 1. 0. 0. 0. 0. 0. 0.]	10	69	Normal	Inferior Frontal Gyrus
578	2010	[ 1. 0. 0. 0. 0. 0. 0.]	10	70	Normal	Inferior Frontal Gyrus
579	972	[ 0. 0. 0. 0. 0. 0. 0.]	1	74	Normal	Inferior Frontal Gyrus
580	523	[ 0. 0. 0. 0. 0. 0. 0.]	1	82	Normal	Inferior Frontal Gyrus
581	842	[ 0. 0. 0. 0. 0. 0. 0.]	1	83	Normal	Inferior Frontal Gyrus
582	551	[ 1. 0. 0. 0. 0. 0. 0.]	10	85	Normal	Inferior Frontal Gyrus
583	82	[ 1. 0. 0. 0. 0. 0. 0.]	10	86	Normal	Inferior Frontal Gyrus
584	800	[ 0. 0. 0. 0. 0. 0. 0.]	1	89	Normal	Inferior Frontal Gyrus
585	776	[ 0. 0. 0. 0. 0. 0. 0.]	1	95	Normal	Inferior Frontal Gyrus
586	230	[ 1. 0. 0. 0. 0. 0. 0.]	10	96	Normal	Inferior Frontal Gyrus
587	625	[ 0. 0. 0. 0. 0. 0. 0.]	1	102	Normal	Inferior Frontal Gyrus
588	836	[ 1. -1. 0. 0. 0. 0. 0.]	27	64	Possible AD	Inferior Frontal Gyrus
589	865	[ 0. 0. 0. 0. 0. 0. 0.]	1	79	Possible AD	Inferior Frontal Gyrus
590	360	[-1. 0. 0. 0. 0. 0. 0.]	2	82	Possible AD	Inferior Frontal Gyrus
591	618	[ 0. 1. 0. 0. 0. 0. 0.]	25	82	Possible AD	Inferior Frontal Gyrus
592	804	[ 0. 0. 0. 0. 0. 0. 0.]	1	82	Possible AD	Inferior Frontal Gyrus
593	639	[ 1. 0. 0. 0. 0. 0. 0.]	10	86	Possible AD	Inferior Frontal Gyrus
594	914	[ 0. 0. 0. 0. 0. 0. 0.]	1	89	Possible AD	Inferior Frontal Gyrus
595	83	[ 1. 0. 0. 0. 0. 0. 0.]	10	90	Possible AD	Inferior Frontal Gyrus
596	892	[ 0. 1. 0. 0. 0. 0. 0.]	25	90	Possible AD	Inferior Frontal Gyrus
597	480	[ 1. 0. 0. 0. 0. 0. 0.]	10	91	Possible AD	Inferior Frontal Gyrus
598	616	[-1. 0. 1. 0. 0. 0. 0.]	30	91	Possible AD	Inferior Frontal Gyrus
599	879	[ 0. 0. 0. 0. 0. 0. 0.]	1	91	Possible AD	Inferior Frontal Gyrus
600	973	[ 1. 0. 0. 0. 0. 0. 0.]	10	96	Possible AD	Inferior Frontal Gyrus
601	1006	[ 0. 0. 0. 0. 0. 0. 0.]	1	98	Possible AD	Inferior Frontal Gyrus
602	234	[ 1. 1. 1. 0. 0. 0. 0.]	21	99	Possible AD	Inferior Frontal Gyrus
603	988	[ 0. 0. 0. 0. 0. 0. 0.]	1	79	Probable AD	Inferior Frontal Gyrus
604	1027	[ 0. 0. 0. 0. 0. 0. 0.]	1	80	Probable AD	Inferior Frontal Gyrus
605	340	[ 0. 0. 1. 0. 0. 0. 0.]	50	83	Probable AD	Inferior Frontal Gyrus
606	750	[ 0. 0. 0. 0. 0. 0. 0.]	1	84	Probable AD	Inferior Frontal Gyrus
607	111	[ 1. 0. 0. 0. 0. 0. 0.]	10	93	Probable AD	Inferior Frontal Gyrus
608	367	[ 0. 0. 0. 0. 0. 0. 0.]	1	93	Probable AD	Inferior Frontal Gyrus
609	592	[ 1. 0. 0. 0. 0. 0. 0.]	10	95	Probable AD	Inferior Frontal Gyrus
610	233	[ 0. 0. 0. 0. 0. 0. 0.]	1	100	Probable AD	Inferior Frontal Gyrus
611	316	[-1. 0. 0. 0. 1. 1. 0.]	9	64	definite AD	Inferior Frontal Gyrus
612	427	[ 1. 0. 0. 0. 0. 0. 0.]	10	80	definite AD	Inferior Frontal Gyrus
613	451	[ 0. 0. 0. 0. 0. 0. 0.]	1	83	definite AD	Inferior Frontal Gyrus
614	347	[ 1. 0. 0. 0. 0. 0. 0.]	10	84	definite AD	Inferior Frontal Gyrus
615	457	[ 1. 0. 0. 0. 0. 0. 0.]	10	84	definite AD	Inferior Frontal Gyrus
616	870	[ 0. 0. 0. 0. 0. 0. 0.]	1	85	definite AD	Inferior Frontal Gyrus
617	375	[ 1. 0. 0. 0. 0. 0. 0.]	10	87	definite AD	Inferior Frontal Gyrus
618	462	[ 0. 0. 0. 0. 0. 0. 0.]	1	87	definite AD	Inferior Frontal Gyrus
619	488	[ 0. 0. 0. 0. 0. 0. 0.]	1	87	definite AD	Inferior Frontal Gyrus
620	755	[ 1. 0. 0. 0. 0. 0. 0.]	10	87	definite AD	Inferior Frontal Gyrus
621	571	[ 0. 0. 0. 0. 0. 0. 0.]	1	89	definite AD	Inferior Frontal Gyrus
622	66	[ 1. 0. 0. 0. 0. 0. 0.]	10	89	definite AD	Inferior Frontal Gyrus
623	468	[ 0. 0. 0. 0. 0. 0. 0.]	1	90	definite AD	Inferior Frontal Gyrus
624	975	[-1. 0. 0. 0. 0. 0. 0.]	2	90	definite AD	Inferior Frontal Gyrus
625	215	[ 0. 0. 0. 0. 0. 0. 0.]	1	91	definite AD	Inferior Frontal Gyrus
626	1023	[ 0. 0. 0. 0. 0. 0. 0.]	1	92	definite AD	Inferior Frontal Gyrus
627	13	[ 1. 0. 0. 0. 0. 0. 0.]	10	94	definite AD	Inferior Frontal Gyrus
628	332	[ 1. 0. 0. 0. 0. 0. 0.]	10	94	definite AD	Inferior Frontal Gyrus
629	256	[ 0. 0. 0. 0. 0. 0. 0.]	1	99	definite AD	Inferior Frontal Gyrus
630	1018	[ 1. 0. 0. 0. 0. 0. 0.]	10	60	Normal	Dorsolateral Prefrontal Cortex
631	990	[ 0. 0. 0. 0. 0. 0. 0.]	1	62	Normal	Dorsolateral Prefrontal Cortex
632	495	[ 0. 0. 0. 0. 0. 0. 0.]	1	69	Normal	Dorsolateral Prefrontal Cortex
633	923	[ 0. 0. 0. 0. 0. 0. 0.]	1	69	Normal	Dorsolateral Prefrontal Cortex
634	2010	[ 1. 0. 0. 0. 0. 0. 0.]	10	70	Normal	Dorsolateral Prefrontal Cortex
635	972	[ 0. 0. 0. 0. 0. 0. 0.]	1	74	Normal	Dorsolateral Prefrontal Cortex
636	523	[ 0. -1. 1. 0. 0. 0. 0.]	29	82	Normal	Dorsolateral Prefrontal Cortex
637	842	[ 0. 0. 0. 0. 0. 0. 0.]	1	83	Normal	Dorsolateral Prefrontal Cortex
638	684	[ 0. 0. 0. 0. 0. 0. 0.]	1	84	Normal	Dorsolateral Prefrontal Cortex
639	1039	[ 0. 0. 0. 0. 0. 0. 0.]	1	85	Normal	Dorsolateral Prefrontal Cortex
640	551	[ 0. 0. 0. 0. 0. 0. 0.]	1	85	Normal	Dorsolateral Prefrontal Cortex
641	82	[ 0. 0. 0. 0. 0. 0. 0.]	1	86	Normal	Dorsolateral Prefrontal Cortex
642	800	[ 0. 0. 0. 0. 0. 0. 0.]	1	89	Normal	Dorsolateral Prefrontal Cortex
643	776	[ 0. 0. 0. 0. 0. 0. 0.]	1	95	Normal	Dorsolateral Prefrontal Cortex
644	230	[ 1. 0. 0. 0. 0. 0. 0.]	10	96	Normal	Dorsolateral Prefrontal Cortex
645	625	[ 1. 0. 0. 0. 0. 0. 0.]	10	102	Normal	Dorsolateral Prefrontal Cortex
646	836	[ 1. -1. 0. 0. 0. 0. 0.]	27	64	Possible AD	Dorsolateral Prefrontal Cortex
647	865	[ 0. 0. 0. 0. 0. 0. 0.]	1	79	Possible AD	Dorsolateral Prefrontal Cortex
648	618	[ 0. 0. 0. 0. 0. 0. 0.]	1	82	Possible AD	Dorsolateral Prefrontal Cortex
649	804	[ 0. 0. 0. 0. 0. 0. 0.]	1	82	Possible AD	Dorsolateral Prefrontal Cortex
650	940	[ 0. 0. 0. 0. 0. 0. 0.]	1	83	Possible AD	Dorsolateral Prefrontal Cortex
651	639	[ 0. 0. 0. 0. 0. 0. 0.]	1	86	Possible AD	Dorsolateral Prefrontal Cortex
652	941	[ 0. 0. 0. 0. 0. 0. 0.]	1	88	Possible AD	Dorsolateral Prefrontal Cortex
653	914	[ 0. 0. 0. 0. 0. 0. 0.]	1	89	Possible AD	Dorsolateral Prefrontal Cortex
654	83	[ 1. 0. 0. 0. 0. 0. 0.]	10	90	Possible AD	Dorsolateral Prefrontal Cortex
655	892	[ 0. 0. 0. 0. 0. 0. 0.]	1	90	Possible AD	Dorsolateral Prefrontal Cortex
656	480	[ 0. -1. 0. 0. 0. 0. 0.]	52	91	Possible AD	Dorsolateral Prefrontal Cortex
657	1006	[ 0. 0. 0. 0. 0. 0. 0.]	1	98	Possible AD	Dorsolateral Prefrontal Cortex
658	234	[ 1. 1. 0. 0. 0. 0. 0.]	46	99	Possible AD	Dorsolateral Prefrontal Cortex
659	988	[ 0. 0. 0. 0. 0. 0. 0.]	1	79	Probable AD	Dorsolateral Prefrontal Cortex
660	798	[ 0. 0. 0. 0. 0. 0. 0.]	1	81	Probable AD	Dorsolateral Prefrontal Cortex
661	184	[ 0. -1. 0. 0. 0. 0. 0.]	52	86	Probable AD	Dorsolateral Prefrontal Cortex
662	882	[ 0. 0. 0. 0. 0. 0. 0.]	1	90	Probable AD	Dorsolateral Prefrontal Cortex
663	963	[ 0. 0. 0. 0. 0. 0. 0.]	1	90	Probable AD	Dorsolateral Prefrontal Cortex
664	111	[ 1. 0. 0. 0. 0. 0. 0.]	10	93	Probable AD	Dorsolateral Prefrontal Cortex
665	367	[ 0. 0. 0. 0. 0. 0. 0.]	1	93	Probable AD	Dorsolateral Prefrontal Cortex
666	869	[ 0. 0. 0. 0. 0. 0. 0.]	1	93	Probable AD	Dorsolateral Prefrontal Cortex
667	592	[ 0. -1. 0. 0. 0. 0. 0.]	52	95	Probable AD	Dorsolateral Prefrontal Cortex
668	1012	[ 0. 0. 0. 0. 0. 0. 0.]	1	98	Probable AD	Dorsolateral Prefrontal Cortex
669	233	[ 0. 0. 0. 0. 0. 0. 0.]	1	100	Probable AD	Dorsolateral Prefrontal Cortex
670	316	[-1. 0. 0. 0. 0. 0. 0.]	2	64	definite AD	Dorsolateral Prefrontal Cortex
671	989	[ 0. 0. 0. 0. 0. 0. 0.]	1	73	definite AD	Dorsolateral Prefrontal Cortex
672	347	[ 0. 0. 0. 0. 0. 0. 0.]	1	84	definite AD	Dorsolateral Prefrontal Cortex
673	457	[ 0. 0. 0. 0. 0. 0. 0.]	1	84	definite AD	Dorsolateral Prefrontal Cortex
674	870	[ 0. 0. 0. 0. 0. 0. 0.]	1	85	definite AD	Dorsolateral Prefrontal Cortex
675	375	[ 1. 0. 0. 0. 0. 0. 0.]	10	87	definite AD	Dorsolateral Prefrontal Cortex
676	462	[ 0. -1. 0. 0. 0. 0. 0.]	52	87	definite AD	Dorsolateral Prefrontal Cortex
677	488	[ 0. -1. 0. 0. 0. 0. 0.]	52	87	definite AD	Dorsolateral Prefrontal Cortex
678	755	[ 1. 0. 0. 0. 0. 0. 0.]	10	87	definite AD	Dorsolateral Prefrontal Cortex
679	66	[ 0. 0. 0. 0. 0. 0. 0.]	1	89	definite AD	Dorsolateral Prefrontal Cortex
680	468	[ 0. -1. 1. 0. 0. 0. 0.]	29	90	definite AD	Dorsolateral Prefrontal Cortex
681	215	[ 0. -1. 0. 0. 0. 0. 0.]	52	91	definite AD	Dorsolateral Prefrontal Cortex
682	1023	[ 0. 0. 0. 0. 0. 0. 0.]	1	92	definite AD	Dorsolateral Prefrontal Cortex
683	13	[ 0. 0. -1. 0. 0. 0. 0.]	19	94	definite AD	Dorsolateral Prefrontal Cortex
684	332	[ 1. 0. -1. 0. 0. 0. 0.]	12	94	definite AD	Dorsolateral Prefrontal Cortex
685	786	[ 0. 0. 0. 0. 0. 0. 0.]	1	95	definite AD	Dorsolateral Prefrontal Cortex
686	256	[ 0. 1. 0. 0. 0. 0. 0.]	25	99	definite AD	Dorsolateral Prefrontal Cortex
687	843	[ 0. 0. 0. 0. 0. 0. 0.]	1	66	Normal	Superior Parietal Lobule
688	495	[ 0. 0. 0. 0. 0. 0. 0.]	1	69	Normal	Superior Parietal Lobule
689	923	[ 0. 0. 0. 0. 0. 0. 0.]	1	69	Normal	Superior Parietal Lobule
690	2010	[ 0. 0. 0. 0. 0. 0. 0.]	1	70	Normal	Superior Parietal Lobule
691	972	[ 0. 0. 0. 0. 0. 0. 0.]	1	74	Normal	Superior Parietal Lobule
692	842	[ 0. 0. 0. 0. 0. 0. 0.]	1	83	Normal	Superior Parietal Lobule
693	551	[ 1. 0. 0. 0. 0. 0. 0.]	10	85	Normal	Superior Parietal Lobule
694	82	[ 0. -1. 0. 0. 0. 0. 0.]	52	86	Normal	Superior Parietal Lobule
695	800	[ 0. 0. 0. 0. 0. 0. 0.]	1	89	Normal	Superior Parietal Lobule
696	532	[-1. 0. 0. 0. 0. 0. 0.]	2	92	Normal	Superior Parietal Lobule
697	776	[ 0. -1. 0. 0. 0. 0. 0.]	52	95	Normal	Superior Parietal Lobule
698	230	[ 0. 0. 0. 0. 0. 0. 0.]	1	96	Normal	Superior Parietal Lobule
699	625	[ 0. 0. 0. 0. 0. 0. 0.]	1	102	Normal	Superior Parietal Lobule
700	836	[ 1. 0. 0. 0. 0. 0. 0.]	10	64	Possible AD	Superior Parietal Lobule
701	865	[ 0. 0. 0. 0. 0. 0. 0.]	1	79	Possible AD	Superior Parietal Lobule
702	618	[ 0. 0. 0. 0. 0. 0. 0.]	1	82	Possible AD	Superior Parietal Lobule
703	804	[ 0. 0. 0. 0. 0. 0. 0.]	1	82	Possible AD	Superior Parietal Lobule
704	639	[ 0. 0. 0. 0. 0. 0. 0.]	1	86	Possible AD	Superior Parietal Lobule
705	941	[ 0. 0. 0. 0. 0. 0. 0.]	1	88	Possible AD	Superior Parietal Lobule
706	914	[ 0. 0. 0. 0. 0. 0. 0.]	1	89	Possible AD	Superior Parietal Lobule
707	417	[ 0. 0. 0. 0. 0. 0. 0.]	1	90	Possible AD	Superior Parietal Lobule
708	83	[ 1. 0. 0. 0. 0. 0. 0.]	10	90	Possible AD	Superior Parietal Lobule
709	892	[ 1. 0. 0. 0. 0. 0. 0.]	10	90	Possible AD	Superior Parietal Lobule
710	480	[ 1. 0. 0. 0. 0. 0. 0.]	10	91	Possible AD	Superior Parietal Lobule
711	616	[ 0. 0. 1. 0. 0. 0. 0.]	50	91	Possible AD	Superior Parietal Lobule
712	973	[ 0. 0. 0. 0. 0. 0. 0.]	1	96	Possible AD	Superior Parietal Lobule
713	1006	[ 0. 0. 0. 0. 0. 0. 0.]	1	98	Possible AD	Superior Parietal Lobule
714	234	[ 1. 0. 0. 0. 0. 0. 0.]	10	99	Possible AD	Superior Parietal Lobule
715	988	[ 0. 0. 0. 0. 0. 0. 0.]	1	79	Probable AD	Superior Parietal Lobule
716	340	[-1. 0. 1. 0. 0. 0. 0.]	30	83	Probable AD	Superior Parietal Lobule
717	184	[ 0. 0. 1. 0. 0. 0. 0.]	50	86	Probable AD	Superior Parietal Lobule
718	882	[ 0. -1. 0. 0. 0. 0. 0.]	52	90	Probable AD	Superior Parietal Lobule
719	665	[-1. 0. 1. 0. 0. 0. 0.]	30	92	Probable AD	Superior Parietal Lobule
720	956	[ 0. 0. 0. 0. -1. 0. 0.]	7	93	Probable AD	Superior Parietal Lobule
721	709	[ 0. 0. 0. 0. 0. 0. 0.]	1	94	Probable AD	Superior Parietal Lobule
722	592	[ 0. 0. 0. 0. 0. 0. 0.]	1	95	Probable AD	Superior Parietal Lobule
723	233	[ 0. 0. 0. 0. 0. 0. 0.]	1	100	Probable AD	Superior Parietal Lobule
724	425	[ 0. 0. 0. 0. 0. 0. 0.]	1	62	definite AD	Superior Parietal Lobule
725	427	[ 0. 0. 0. 0. 0. 0. 0.]	1	80	definite AD	Superior Parietal Lobule
726	347	[ 0. 0. 0. 0. 0. 0. 0.]	1	84	definite AD	Superior Parietal Lobule
727	870	[ 0. -1. 0. 0. 0. 0. 0.]	52	85	definite AD	Superior Parietal Lobule
728	375	[ 0. 0. 0. 0. 0. 0. 0.]	1	87	definite AD	Superior Parietal Lobule
729	462	[ 0. 0. 1. 0. 0. 0. 0.]	50	87	definite AD	Superior Parietal Lobule
730	488	[ 0. -1. 0. 0. 0. 0. 0.]	52	87	definite AD	Superior Parietal Lobule
731	755	[ 0. 0. 0. 0. 0. 0. 0.]	1	87	definite AD	Superior Parietal Lobule
732	571	[ 0. -1. 0. 0. 0. 0. 0.]	52	89	definite AD	Superior Parietal Lobule
733	215	[ 0. 0. 0. 0. 0. 0. 0.]	1	91	definite AD	Superior Parietal Lobule
734	13	[ 1. 0. 0. 0. 0. 0. 0.]	10	94	definite AD	Superior Parietal Lobule
735	332	[ 1. 0. 0. 0. 0. 0. 0.]	10	94	definite AD	Superior Parietal Lobule
736	786	[ 0. 0. 0. 0. 0. 0. 0.]	1	95	definite AD	Superior Parietal Lobule
737	843	[ 1. -1. 0. 0. 0. 0. 0.]	27	66	Normal	Prefrontal Cortex
738	495	[ 0. 0. 0. 0. 0. 0. 0.]	1	69	Normal	Prefrontal Cortex
739	923	[ 0. 0. 0. 0. 0. 0. 0.]	1	69	Normal	Prefrontal Cortex
740	2010	[ 0. 0. 0. 0. 0. 0. 0.]	1	70	Normal	Prefrontal Cortex
741	232	[ 0. 0. 0. 0. 0. 0. 0.]	1	74	Normal	Prefrontal Cortex
742	842	[ 0. -1. 0. 0. 0. 0. 0.]	52	83	Normal	Prefrontal Cortex
743	82	[ 0. 0. 0. 0. 0. 0. 0.]	1	86	Normal	Prefrontal Cortex
744	800	[ 0. 0. -1. 0. 0. 0. 0.]	19	89	Normal	Prefrontal Cortex
745	776	[ 0. 0. 0. 0. 0. 0. 0.]	1	95	Normal	Prefrontal Cortex
746	230	[ 0. 0. 0. 0. 0. 0. 0.]	1	96	Normal	Prefrontal Cortex
747	625	[ 0. 0. 0. 0. 0. 0. 0.]	1	102	Normal	Prefrontal Cortex
748	836	[ 1. -1. 0. 0. 0. 0. 0.]	27	64	Possible AD	Prefrontal Cortex
749	618	[ 0. 1. 0. 0. 0. 0. 0.]	25	82	Possible AD	Prefrontal Cortex
750	386	[ 0. 0. 0. 0. 0. 0. 0.]	1	83	Possible AD	Prefrontal Cortex
751	639	[ 0. 0. 0. 0. 0. 0. 0.]	1	86	Possible AD	Prefrontal Cortex
752	941	[ 0. 0. 0. 0. 0. 0. 0.]	1	88	Possible AD	Prefrontal Cortex
753	589	[ 1. 0. 0. 0. 0. 0. 0.]	10	90	Possible AD	Prefrontal Cortex
754	83	[ 1. 0. 0. 0. 0. 0. 0.]	10	90	Possible AD	Prefrontal Cortex
755	480	[ 1. 0. 0. 0. 0. 0. 0.]	10	91	Possible AD	Prefrontal Cortex
756	616	[-1. 0. 0. 0. 0. 0. 0.]	2	91	Possible AD	Prefrontal Cortex
757	973	[ 0. 0. 0. 0. 0. 0. 0.]	1	96	Possible AD	Prefrontal Cortex
758	1006	[ 0. 0. 0. 0. 0. 0. 0.]	1	98	Possible AD	Prefrontal Cortex
759	234	[ 1. 0. 0. 0. 0. 0. 0.]	10	99	Possible AD	Prefrontal Cortex
760	988	[ 0. 0. 0. 0. 0. 0. 0.]	1	79	Probable AD	Prefrontal Cortex
761	1027	[ 0. 0. 0. 0. 0. 0. 0.]	1	80	Probable AD	Prefrontal Cortex
762	340	[-1. 0. 1. 0. 0. 0. 0.]	30	83	Probable AD	Prefrontal Cortex
763	184	[ 1. 0. 0. 0. 0. 0. 0.]	10	86	Probable AD	Prefrontal Cortex
764	882	[ 0. -1. 0. 0. 0. 0. 0.]	52	90	Probable AD	Prefrontal Cortex
765	111	[ 0. 0. 0. 0. 0. 0. 0.]	1	93	Probable AD	Prefrontal Cortex
766	367	[ 0. 0. 0. 0. 0. 0. 0.]	1	93	Probable AD	Prefrontal Cortex
767	869	[ 0. -1. 0. 0. 0. 0. 0.]	52	93	Probable AD	Prefrontal Cortex
768	95	[ 0. 0. 0. 0. 0. 0. 0.]	1	93	Probable AD	Prefrontal Cortex
769	956	[ 0. 1. 0. 0. 0. 0. 0.]	25	93	Probable AD	Prefrontal Cortex
770	592	[ 0. 0. 0. 0. 0. 0. 0.]	1	95	Probable AD	Prefrontal Cortex
771	1012	[ 0. 0. 0. 0. 0. 0. 0.]	1	98	Probable AD	Prefrontal Cortex
772	425	[ 0. 0. 0. 0. 0. 0. 0.]	1	62	definite AD	Prefrontal Cortex
773	316	[-1. 0. 0. 0. 0. 0. 0.]	2	64	definite AD	Prefrontal Cortex
774	479	[ 0. 0. 0. 0. 0. 0. 0.]	1	74	definite AD	Prefrontal Cortex
775	427	[ 1. 0. 0. 0. 0. 0. 0.]	10	80	definite AD	Prefrontal Cortex
776	372	[-1. -1. 0. 0. 0. 0. 0.]	38	83	definite AD	Prefrontal Cortex
777	451	[ 0. 0. 0. 0. 0. 0. 0.]	1	83	definite AD	Prefrontal Cortex
778	347	[ 0. 0. 1. 0. 0. 0. 0.]	50	84	definite AD	Prefrontal Cortex
779	364	[ 0. 0. 0. 0. 0. 0. 0.]	1	84	definite AD	Prefrontal Cortex
780	457	[ 0. 0. 0. 0. 0. 0. 0.]	1	84	definite AD	Prefrontal Cortex
781	870	[ 0. 0. 0. 0. 0. 0. 0.]	1	85	definite AD	Prefrontal Cortex
782	375	[ 0. 0. 0. 0. 0. 0. 0.]	1	87	definite AD	Prefrontal Cortex
783	462	[ 0. 0. 0. 0. 0. 0. 0.]	1	87	definite AD	Prefrontal Cortex
784	488	[ 0. 0. 0. 0. 0. 0. 0.]	1	87	definite AD	Prefrontal Cortex
785	755	[ 0. 0. -1. 0. 0. 0. 0.]	19	87	definite AD	Prefrontal Cortex
786	992	[-1. 0. 0. 0. 0. 0. 0.]	2	88	definite AD	Prefrontal Cortex
787	571	[ 1. 0. 0. 0. 0. 0. 0.]	10	89	definite AD	Prefrontal Cortex
788	215	[ 0. 0. 0. 0. 0. 0. 0.]	1	91	definite AD	Prefrontal Cortex
789	13	[ 0. 0. 0. 0. 0. 0. 0.]	1	94	definite AD	Prefrontal Cortex
790	332	[ 1. 0. 0. 0. 0. 0. 0.]	10	94	definite AD	Prefrontal Cortex
791	786	[ 0. 0. 0. 0. 0. 0. 0.]	1	95	definite AD	Prefrontal Cortex
792	256	[ 0. 0. 0. 0. 0. 0. 0.]	1	99	definite AD	Prefrontal Cortex
793	843	[-1. 0. -1. 0. 0. 0. 0.]	40	66	Normal	Caudate Nucleus
794	495	[ 0. 0. -1. 0. 0. 0. 0.]	19	69	Normal	Caudate Nucleus
795	923	[-1. 0. -1. 0. 0. 0. 0.]	40	69	Normal	Caudate Nucleus
796	523	[ 0. 1. -1. 0. 0. 0. 0.]	8	82	Normal	Caudate Nucleus
797	842	[-1. 0. -1. 0. 0. 0. 0.]	40	83	Normal	Caudate Nucleus
798	551	[ 0. 1. -1. 0. 0. 0. 0.]	8	85	Normal	Caudate Nucleus
799	82	[-1. 0. -1. 0. 0. 0. 0.]	40	86	Normal	Caudate Nucleus
800	800	[-1. 0. -1. 0. 0. 0. 0.]	40	89	Normal	Caudate Nucleus
801	532	[-1. 1. 0. 0. 0. 0. 0.]	41	92	Normal	Caudate Nucleus
802	776	[ 0. 0. -1. 0. 0. 0. 0.]	19	95	Normal	Caudate Nucleus
803	625	[-1. 0. 0. 1. 0. 0. 0.]	4	102	Normal	Caudate Nucleus
804	865	[ 0. 1. 0. 0. 0. 0. 0.]	25	79	Possible AD	Caudate Nucleus
805	618	[-1. 0. 0. 1. 0. 0. 0.]	4	82	Possible AD	Caudate Nucleus
806	940	[-1. 1. 0. 0. 0. 0. 0.]	41	83	Possible AD	Caudate Nucleus
807	639	[ 0. 0. -1. 1. 0. 0. 0.]	26	86	Possible AD	Caudate Nucleus
808	941	[-1. 0. 0. 0. 0. 0. 0.]	2	88	Possible AD	Caudate Nucleus
809	914	[-1. 0. -1. 0. 0. 0. 0.]	40	89	Possible AD	Caudate Nucleus
810	83	[ 0. 0. -1. 1. 0. 0. 0.]	26	90	Possible AD	Caudate Nucleus
811	892	[ 0. 0. 0. 0. -1. 0. 0.]	7	90	Possible AD	Caudate Nucleus
812	480	[ 0. 1. -1. 1. 0. 0. 0.]	32	91	Possible AD	Caudate Nucleus
813	616	[-1. 1. 0. 0. 0. 0. 0.]	41	91	Possible AD	Caudate Nucleus
814	879	[-1. 1. -1. 0. 0. 0. 0.]	47	91	Possible AD	Caudate Nucleus
815	973	[-1. 0. -1. 0. 0. 0. 0.]	40	96	Possible AD	Caudate Nucleus
816	988	[-1. 0. 0. 0. 0. 0. 0.]	2	79	Probable AD	Caudate Nucleus
817	340	[-1. 0. 0. 0. 0. 0. 0.]	2	83	Probable AD	Caudate Nucleus
818	752	[-1. 0. -1. 0. 0. 0. 0.]	40	84	Probable AD	Caudate Nucleus
819	184	[ 0. 0. 0. 0. 0. 0. 0.]	1	86	Probable AD	Caudate Nucleus
820	882	[-1. 0. -1. 1. 0. 0. 0.]	13	90	Probable AD	Caudate Nucleus
821	963	[-1. 0. 0. 0. 0. 0. 0.]	2	90	Probable AD	Caudate Nucleus
822	367	[-1. 0. 0. 0. 0. 0. 0.]	2	93	Probable AD	Caudate Nucleus
823	869	[-1. 0. 0. 0. 0. 0. 0.]	2	93	Probable AD	Caudate Nucleus
824	592	[ 0. 0. -1. 1. 0. 0. 0.]	26	95	Probable AD	Caudate Nucleus
825	1012	[-1. 0. 0. 0. 0. 0. 1.]	3	98	Probable AD	Caudate Nucleus
826	233	[-1. 0. 0. 0. 0. 0. 0.]	2	100	Probable AD	Caudate Nucleus
827	316	[-1. 0. -1. 0. 0. 0. 0.]	40	64	definite AD	Caudate Nucleus
828	176	[-1. 0. 0. 0. 0. 0. 0.]	2	72	definite AD	Caudate Nucleus
829	989	[-1. 0. 0. 0. 0. 0. 0.]	2	73	definite AD	Caudate Nucleus
830	801	[-1. 0. 0. 0. 0. 0. 0.]	2	74	definite AD	Caudate Nucleus
831	427	[ 0. 0. -1. 1. 0. 0. 0.]	26	80	definite AD	Caudate Nucleus
832	451	[-1. 1. 0. 0. 0. 0. 0.]	41	83	definite AD	Caudate Nucleus
833	347	[ 0. 0. -1. 0. 0. 0. 0.]	19	84	definite AD	Caudate Nucleus
834	457	[ 0. 0. -1. 1. 0. 0. 0.]	26	84	definite AD	Caudate Nucleus
835	870	[-1. 0. -1. 0. 0. 0. 0.]	40	85	definite AD	Caudate Nucleus
836	375	[-1. 0. -1. 1. 0. 0. 0.]	13	87	definite AD	Caudate Nucleus
837	488	[-1. 0. -1. 0. 0. 0. 0.]	40	87	definite AD	Caudate Nucleus
838	755	[ 0. 1. -1. 0. 0. 0. 0.]	8	87	definite AD	Caudate Nucleus
839	66	[-1. 0. -1. 0. 0. 1. 0.]	5	89	definite AD	Caudate Nucleus
840	468	[-1. 0. 0. 0. 0. 0. 0.]	2	90	definite AD	Caudate Nucleus
841	1023	[-1. 0. 0. 0. 0. 0. 0.]	2	92	definite AD	Caudate Nucleus
842	332	[ 0. 1. -1. 1. 0. 0. 0.]	32	94	definite AD	Caudate Nucleus
843	786	[-1. 0. -1. 0. 0. 0. 0.]	40	95	definite AD	Caudate Nucleus
844	256	[ 0. 0. 0. 1. 0. 0. 0.]	24	99	definite AD	Caudate Nucleus
845	843	[-1. 0. 0. 0. 0. 0. 1.]	3	66	Normal	Hippocampus
846	495	[ 0. 0. -1. 0. 0. 0. 0.]	19	69	Normal	Hippocampus
847	923	[ 0. 0. 0. 0. 0. 0. 0.]	1	69	Normal	Hippocampus
848	2010	[ 0. 1. 0. 0. 0. 0. 0.]	25	70	Normal	Hippocampus
849	972	[-1. 0. 0. 0. 0. 0. 0.]	2	74	Normal	Hippocampus
850	523	[-1. 0. -1. 0. 0. 0. 0.]	40	82	Normal	Hippocampus
851	551	[ 0. 0. 0. 0. 0. 0. 0.]	1	85	Normal	Hippocampus
852	800	[-1. 0. 0. 0. 0. 0. 0.]	2	89	Normal	Hippocampus
853	776	[ 0. 0. 0. 0. 0. 0. 0.]	1	95	Normal	Hippocampus
854	230	[ 0. 0. 0. 0. 0. 0. 0.]	1	96	Normal	Hippocampus
855	625	[-1. 0. 0. 0. 0. 0. 0.]	2	102	Normal	Hippocampus
856	836	[ 0. 0. 0. 0. 0. 0. 0.]	1	64	Possible AD	Hippocampus
857	865	[ 0. 1. 0. 0. 0. 0. 0.]	25	79	Possible AD	Hippocampus
858	618	[ 0. 0. -1. 0. 0. 0. 0.]	19	82	Possible AD	Hippocampus
859	386	[-1. 0. 0. 0. 0. 0. 0.]	2	83	Possible AD	Hippocampus
860	940	[-1. 0. 0. 0. 0. 0. 0.]	2	83	Possible AD	Hippocampus
861	639	[-1. 0. 0. 0. 0. 0. 0.]	2	86	Possible AD	Hippocampus
862	941	[-1. 0. 0. 0. 0. 0. 0.]	2	88	Possible AD	Hippocampus
863	914	[ 0. 0. 0. 0. 0. 0. 0.]	1	89	Possible AD	Hippocampus
864	83	[ 0. 0. 0. 0. 0. 0. 0.]	1	90	Possible AD	Hippocampus
865	480	[ 0. 0. 0. 0. 0. 0. 0.]	1	91	Possible AD	Hippocampus
866	616	[-1. -1. 0. 0. 0. 0. 0.]	38	91	Possible AD	Hippocampus
867	973	[ 1. 0. 0. 0. 0. 0. 0.]	10	96	Possible AD	Hippocampus
868	1006	[ 0. 0. 0. 0. 0. 0. 0.]	1	98	Possible AD	Hippocampus
869	234	[ 0. 0. 0. 0. 0. 0. 0.]	1	99	Possible AD	Hippocampus
870	988	[ 0. 0. 0. 0. 0. 0. 0.]	1	79	Probable AD	Hippocampus
871	1027	[-1. 0. 0. 0. 0. 0. 0.]	2	80	Probable AD	Hippocampus
872	798	[-1. 0. 0. 0. 0. 0. 0.]	2	81	Probable AD	Hippocampus
873	184	[ 0. 0. -1. 0. 0. 0. 0.]	19	86	Probable AD	Hippocampus
874	831	[-1. 0. 0. 0. 0. 0. 0.]	2	88	Probable AD	Hippocampus
875	882	[ 0. 0. 0. 0. 0. 0. 0.]	1	90	Probable AD	Hippocampus
876	963	[ 0. 0. 0. 0. 0. 0. 0.]	1	90	Probable AD	Hippocampus
877	111	[ 0. 0. 0. 0. 0. 0. 0.]	1	93	Probable AD	Hippocampus
878	869	[-1. 0. 0. 0. 0. 0. 0.]	2	93	Probable AD	Hippocampus
879	592	[ 0. 0. 0. 0. 1. 0. 0.]	33	95	Probable AD	Hippocampus
880	1012	[-1. 0. 0. 0. 0. 0. 0.]	2	98	Probable AD	Hippocampus
881	233	[ 0. 0. 0. 0. 0. 0. 0.]	1	100	Probable AD	Hippocampus
882	316	[-1. 0. 0. 0. 0. 0. 0.]	2	64	definite AD	Hippocampus
883	427	[ 0. 1. -1. 0. 0. 0. 0.]	8	80	definite AD	Hippocampus
884	451	[ 0. 0. 0. 0. 0. 0. 0.]	1	83	definite AD	Hippocampus
885	347	[ 0. 0. 0. 0. 0. 0. 0.]	1	84	definite AD	Hippocampus
886	457	[ 0. 0. -1. 0. 0. 0. 0.]	19	84	definite AD	Hippocampus
887	623	[-1. -1. 0. 0. 0. 0. 0.]	38	85	definite AD	Hippocampus
888	870	[-1. 0. -1. 0. 0. 0. 1.]	43	85	definite AD	Hippocampus
889	375	[-1. 0. -1. 0. 0. 0. 0.]	40	87	definite AD	Hippocampus
890	462	[ 0. 0. 0. 0. 0. 0. 0.]	1	87	definite AD	Hippocampus
891	488	[ 0. 0. -1. 0. 0. 0. 0.]	19	87	definite AD	Hippocampus
892	671	[-1. 0. 0. 0. 0. 0. 0.]	2	87	definite AD	Hippocampus
893	755	[-1. 0. 0. 0. 0. 0. 0.]	2	87	definite AD	Hippocampus
894	626	[ 0. -1. -1. 0. 0. -1. 0.]	39	88	definite AD	Hippocampus
895	66	[ 0. 0. 0. 0. 0. 0. 0.]	1	89	definite AD	Hippocampus
896	1023	[-1. 0. 0. 0. 0. 0. 0.]	2	92	definite AD	Hippocampus
897	332	[ 1. 0. 0. 0. 0. 0. 0.]	10	94	definite AD	Hippocampus
898	786	[-1. 0. 0. 0. 0. 0. 0.]	2	95	definite AD	Hippocampus
899	256	[ 0. 0. 0. 0. 0. 0. 0.]	1	99	definite AD	Hippocampus
900	843	[-1. 0. -1. 0. 0. 0. 0.]	40	66	Normal	Putamen
901	495	[ 0. 0. -1. 0. 0. 0. 0.]	19	69	Normal	Putamen
902	2010	[-1. 0. -1. 0. 0. 0. 0.]	40	70	Normal	Putamen
903	523	[ 1. 1. -1. 0. 0. 0. 0.]	42	82	Normal	Putamen
904	551	[ 0. 1. -1. 0. 0. 0. 0.]	8	85	Normal	Putamen
905	800	[-1. 0. -1. 0. 0. 0. 0.]	40	89	Normal	Putamen
906	532	[-1. 0. 0. 0. 0. 0. 0.]	2	92	Normal	Putamen
907	230	[ 0. 0. 0. 1. 0. 0. 0.]	24	96	Normal	Putamen
908	625	[-1. 0. -1. 0. 0. 0. 0.]	40	102	Normal	Putamen
909	836	[-1. 0. -1. 0. 0. 0. 0.]	40	64	Possible AD	Putamen
910	865	[ 0. 0. 0. 0. 0. 0. 0.]	1	79	Possible AD	Putamen
911	618	[ 0. 1. 0. 0. 0. 0. 0.]	25	82	Possible AD	Putamen
912	940	[-1. 0. 0. 0. 0. 0. 0.]	2	83	Possible AD	Putamen
913	639	[ 0. 0. -1. 0. 0. 0. 0.]	19	86	Possible AD	Putamen
914	941	[-1. 0. 0. 0. 0. 0. 0.]	2	88	Possible AD	Putamen
915	83	[ 0. 1. -1. 1. 0. 0. 0.]	32	90	Possible AD	Putamen
916	480	[-1. 0. 0. 0. 0. 1. 0.]	17	91	Possible AD	Putamen
917	616	[-1. 0. 0. 0. 0. 0. 0.]	2	91	Possible AD	Putamen
918	879	[-1. 0. -1. 0. 0. 0. 0.]	40	91	Possible AD	Putamen
919	1006	[-1. 0. -1. 0. 0. 1. 0.]	5	98	Possible AD	Putamen
920	234	[ 0. 0. -1. 0. 0. 0. 0.]	19	99	Possible AD	Putamen
921	988	[-1. 0. -1. 0. 0. 0. 0.]	40	79	Probable AD	Putamen
922	1027	[-1. 0. 0. 0. 0. 0. 0.]	2	80	Probable AD	Putamen
923	752	[-1. 0. 0. 1. 0. 0. 0.]	4	84	Probable AD	Putamen
924	902	[-1. 0. -1. 0. 0. 0. 0.]	40	85	Probable AD	Putamen
925	184	[-1. 0. 0. 0. 0. 0. 0.]	2	86	Probable AD	Putamen
926	831	[-1. 0. 0. 0. 0. 0. 0.]	2	88	Probable AD	Putamen
927	882	[ 0. 0. -1. 0. 0. 0. 0.]	19	90	Probable AD	Putamen
928	963	[-1. 0. 0. 0. 0. 0. 0.]	2	90	Probable AD	Putamen
929	869	[-1. 0. 0. 0. 0. 0. 1.]	3	93	Probable AD	Putamen
930	592	[ 0. 1. -1. 0. 0. 0. 0.]	8	95	Probable AD	Putamen
931	1012	[-1. 0. 0. 0. 0. 0. 0.]	2	98	Probable AD	Putamen
932	316	[-1. 0. 0. 0. 0. 0. 0.]	2	64	definite AD	Putamen
933	989	[-1. 0. 0. 0. 0. 0. 0.]	2	73	definite AD	Putamen
934	427	[ 0. 0. -1. 1. 0. 0. 0.]	26	80	definite AD	Putamen
935	364	[-1. 0. 0. 0. 0. 0. 0.]	2	84	definite AD	Putamen
936	457	[ 0. 1. -1. 0. 0. 0. 0.]	8	84	definite AD	Putamen
937	870	[-1. 0. -1. 0. 0. 0. 0.]	40	85	definite AD	Putamen
938	375	[ 0. 0. -1. 0. 0. 0. 0.]	19	87	definite AD	Putamen
939	462	[-1. 0. -1. 0. 0. 0. -1.]	45	87	definite AD	Putamen
940	488	[ 0. 0. -1. 0. 0. 0. 0.]	19	87	definite AD	Putamen
941	755	[-1. 0. -1. 0. 0. 0. 0.]	40	87	definite AD	Putamen
942	992	[-1. 0. 0. 0. 0. 1. 0.]	17	88	definite AD	Putamen
943	571	[ 0. 1. -1. 1. 0. 0. 0.]	32	89	definite AD	Putamen
944	66	[-1. 0. 0. 0. 0. 1. 0.]	17	89	definite AD	Putamen
945	468	[-1. 0. 0. 0. 0. 0. 0.]	2	90	definite AD	Putamen
946	975	[-1. 0. 0. 0. 0. 0. 0.]	2	90	definite AD	Putamen
947	215	[-1. 0. 0. 0. 0. 0. 0.]	2	91	definite AD	Putamen
948	273	[ 0. 0. -1. 0. 0. 0. 0.]	19	92	definite AD	Putamen
949	332	[ 0. 0. -1. 0. 0. 0. 0.]	19	94	definite AD	Putamen
950	786	[-1. 0. -1. 0. 0. 0. 0.]	40	95	definite AD	Putamen
951	256	[-1. 1. -1. 0. 0. 0. 0.]	47	99	definite AD	Putamen
